# Supplementary material for: Multi-Platform Proteomic Analysis of Alzheimer’s Disease Cerebrospinal Fluid and Plasma Reveals Network Biomarkers Associated with Proteostasis and the Matrisome
Source: bioRxiv or medRxiv preprint supplement (doi:10.1101/2022.06.20.494087), 2022-11-15

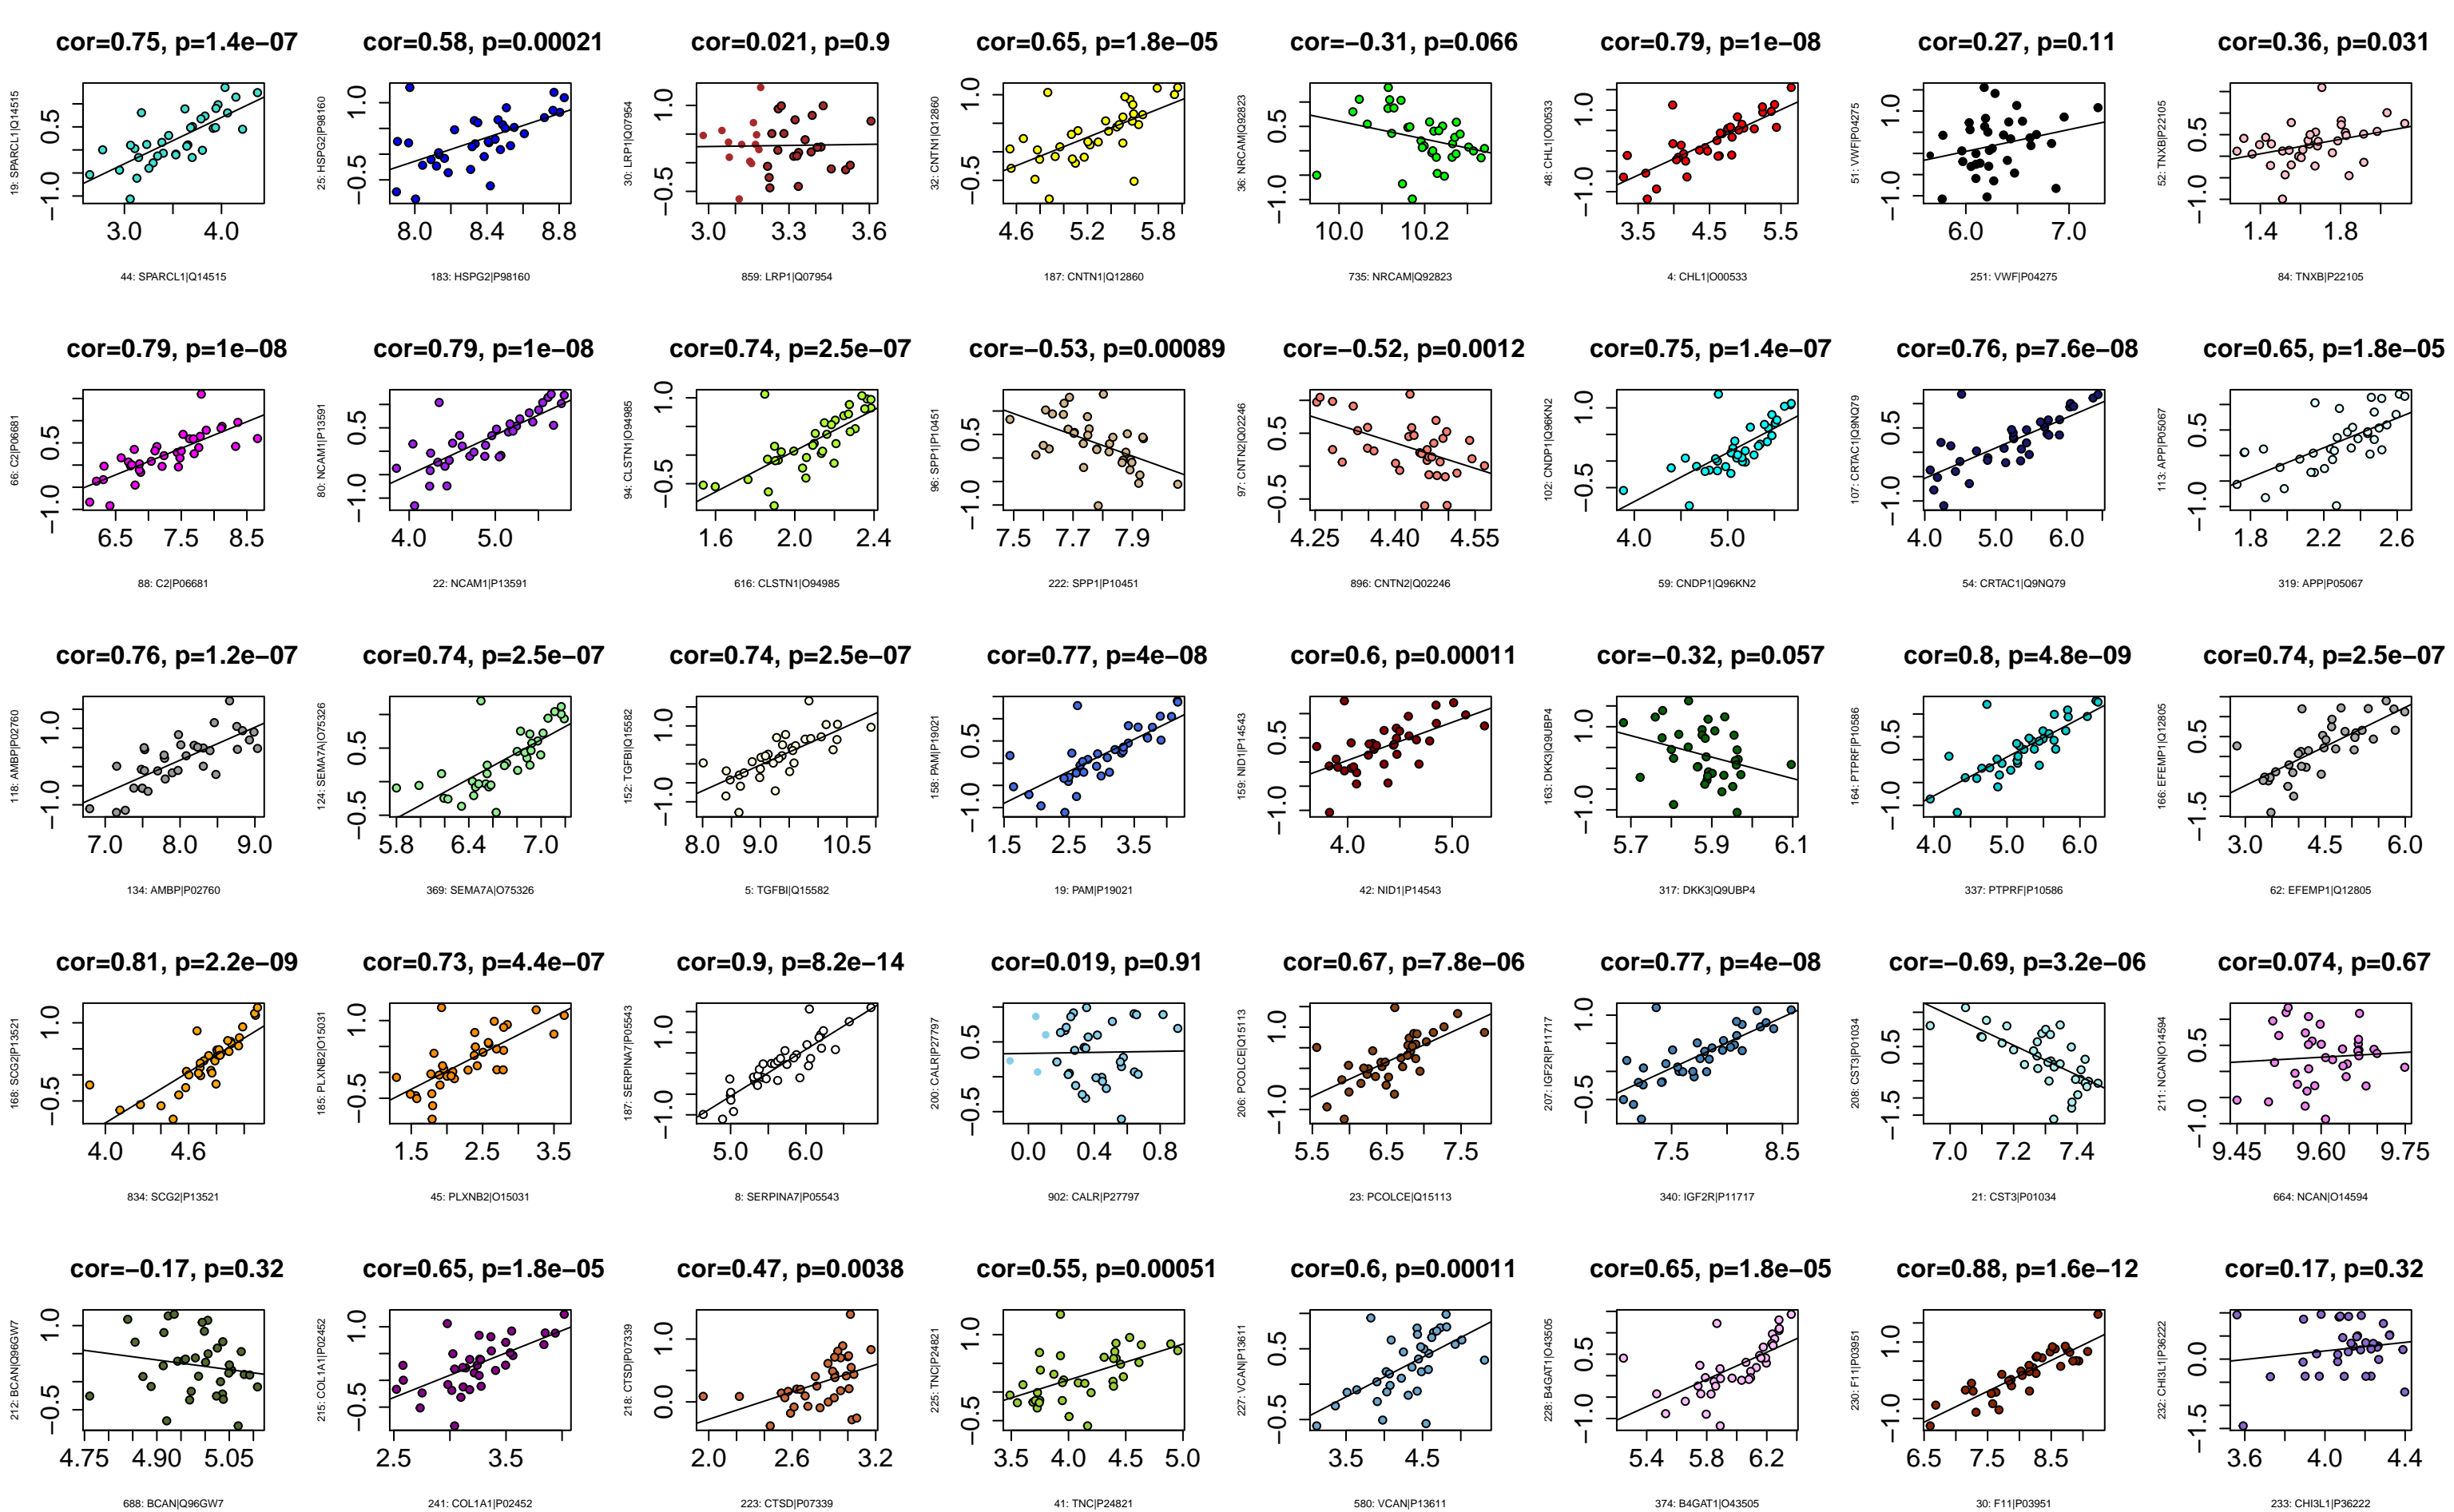

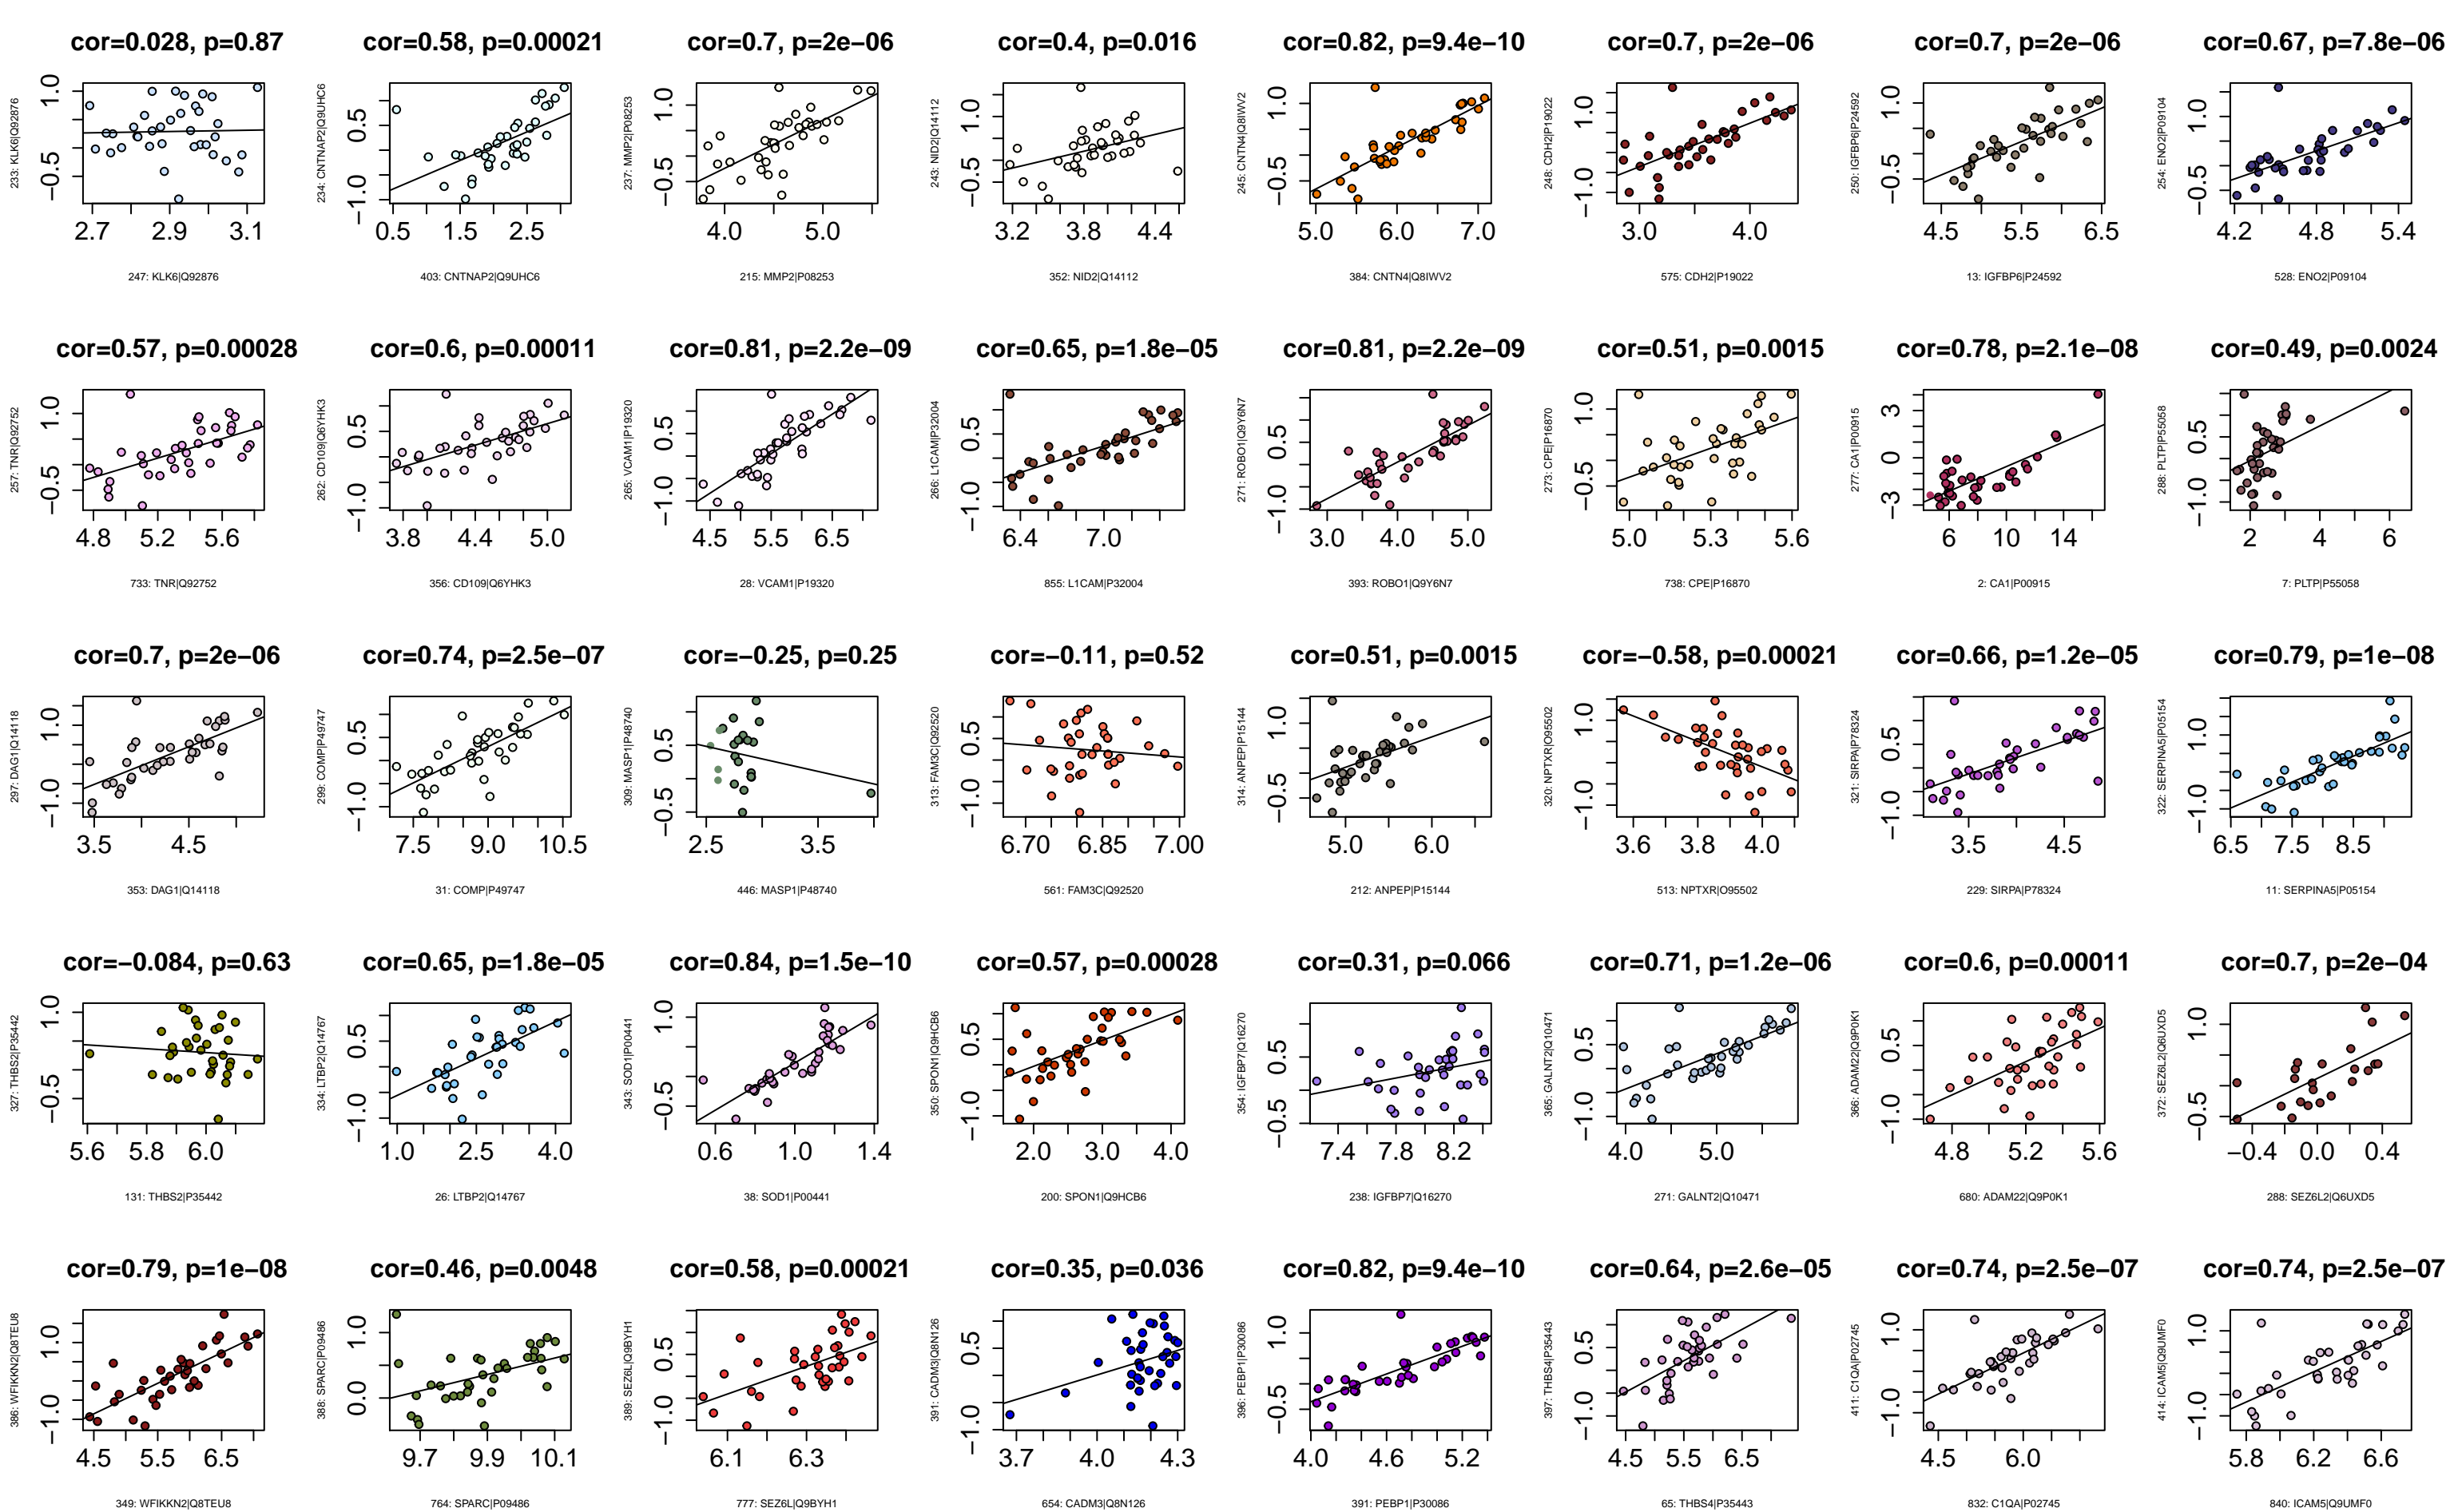

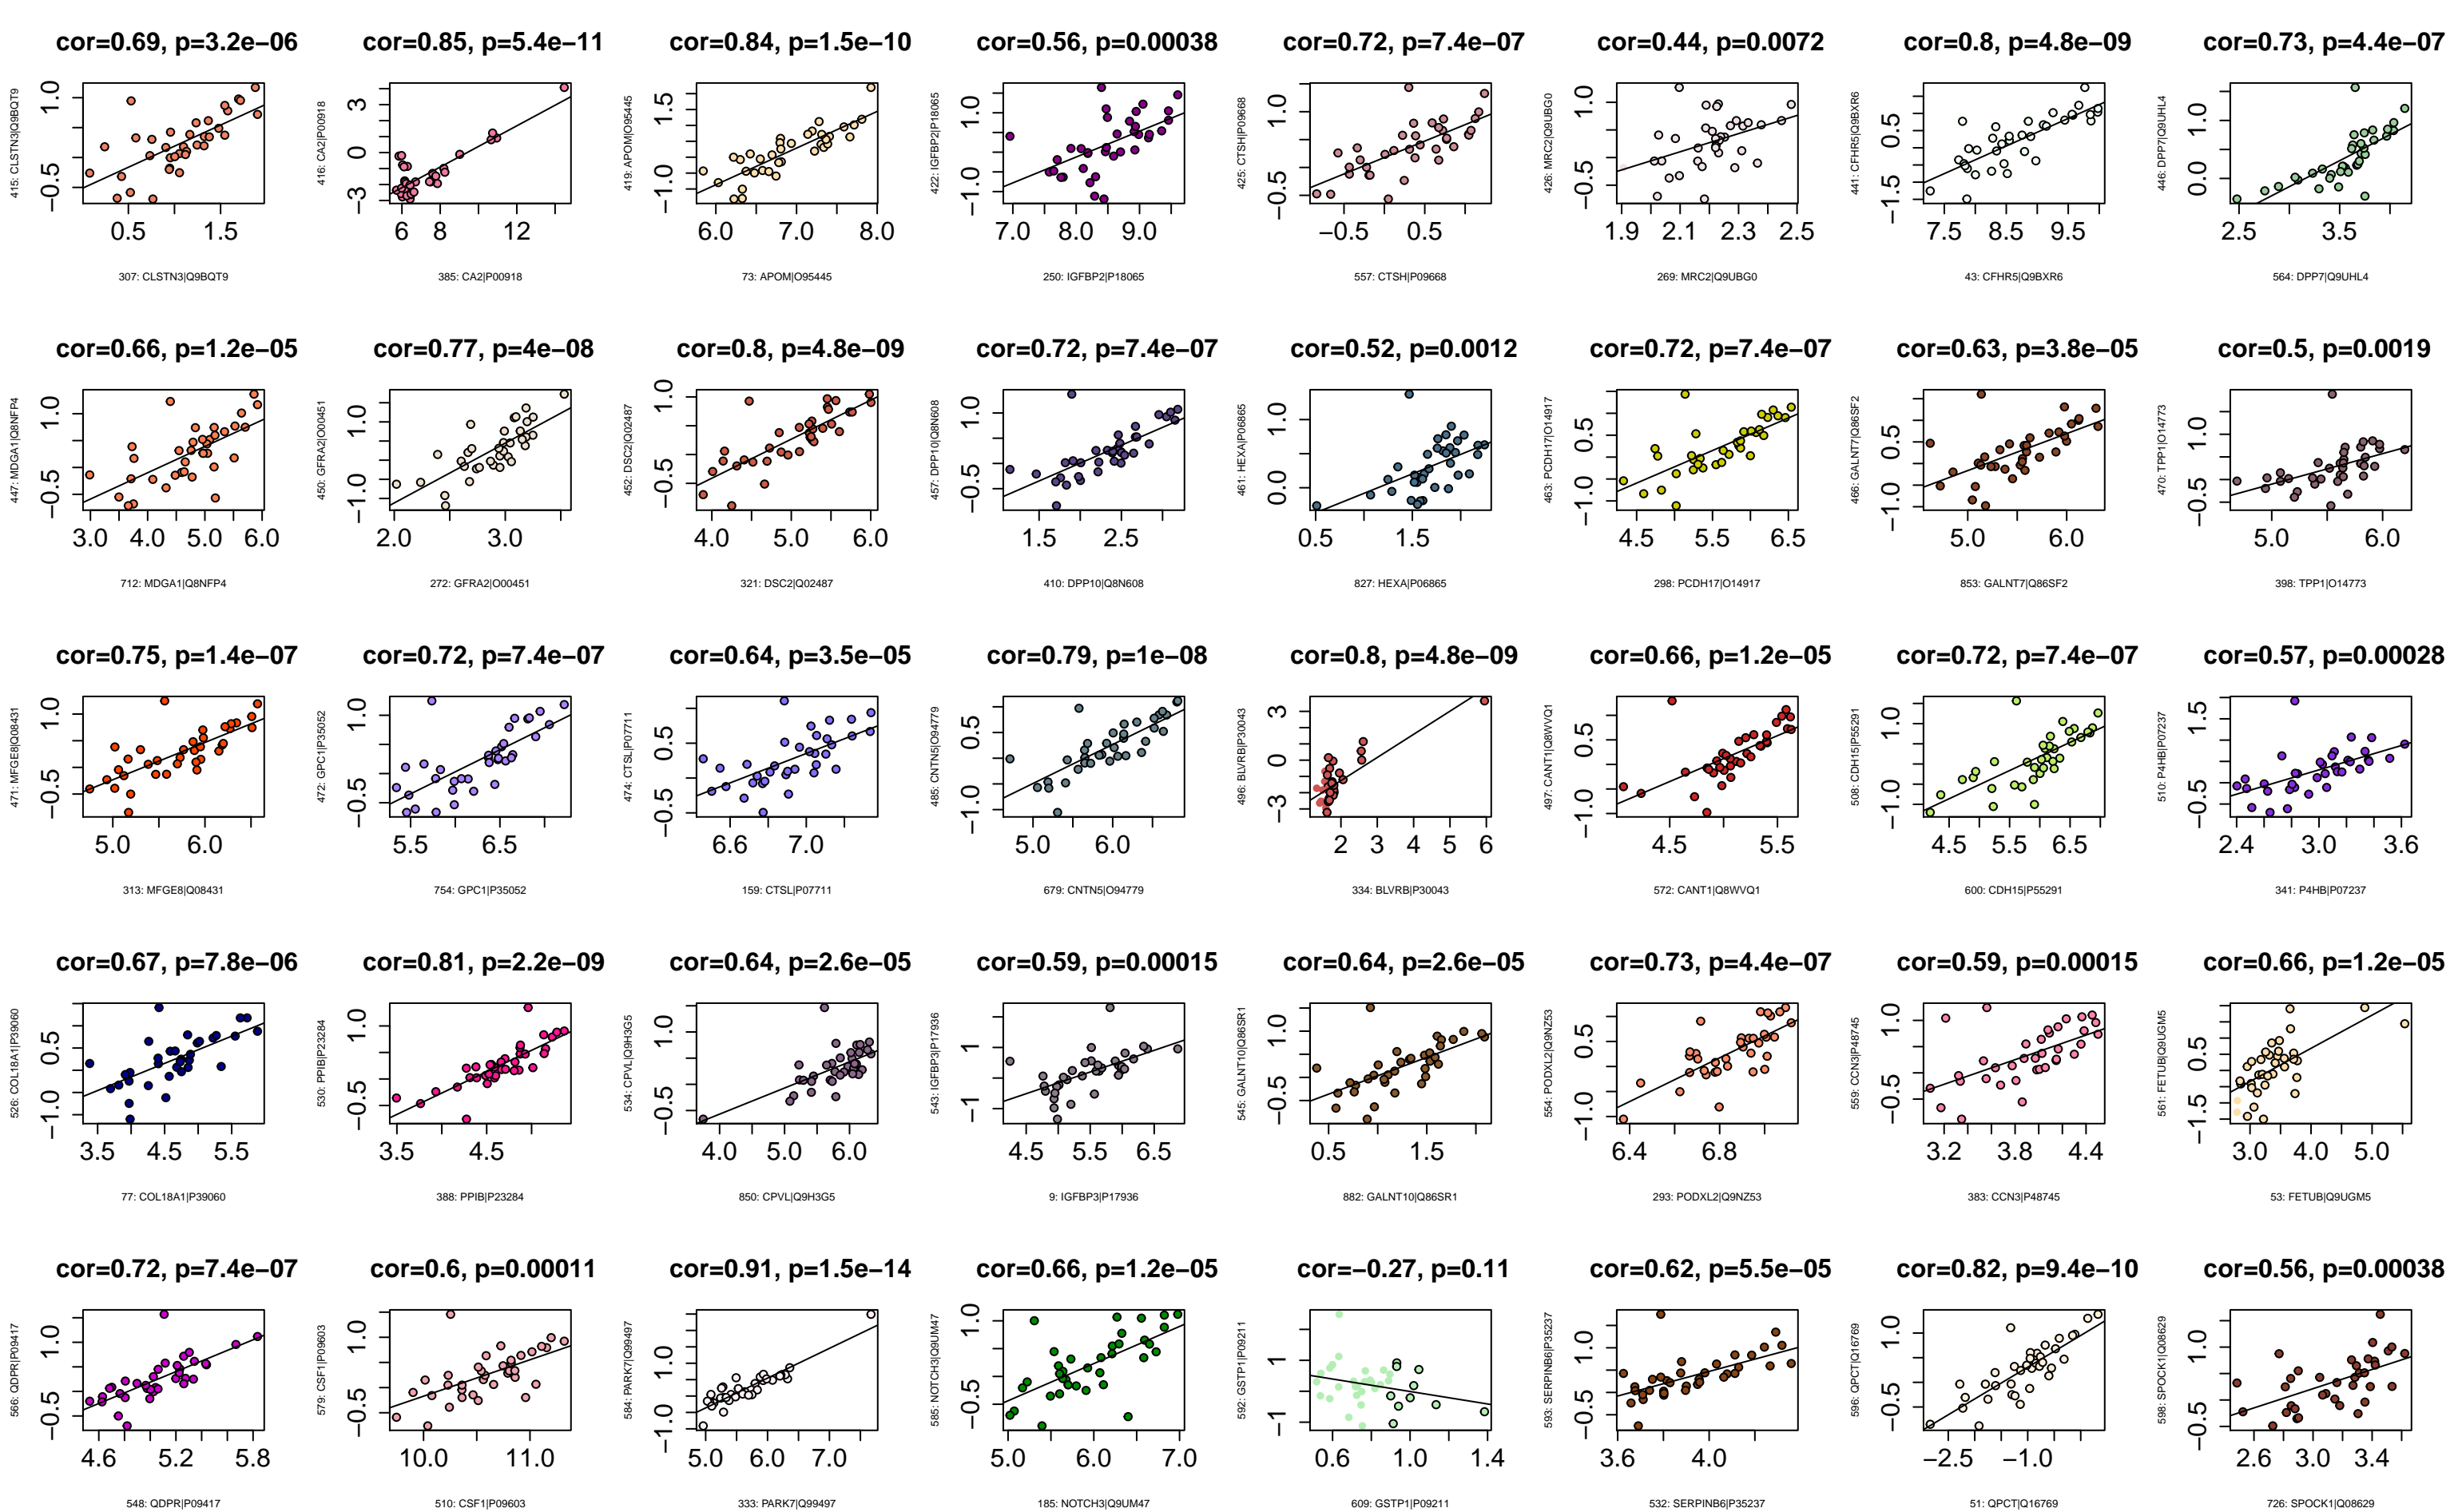

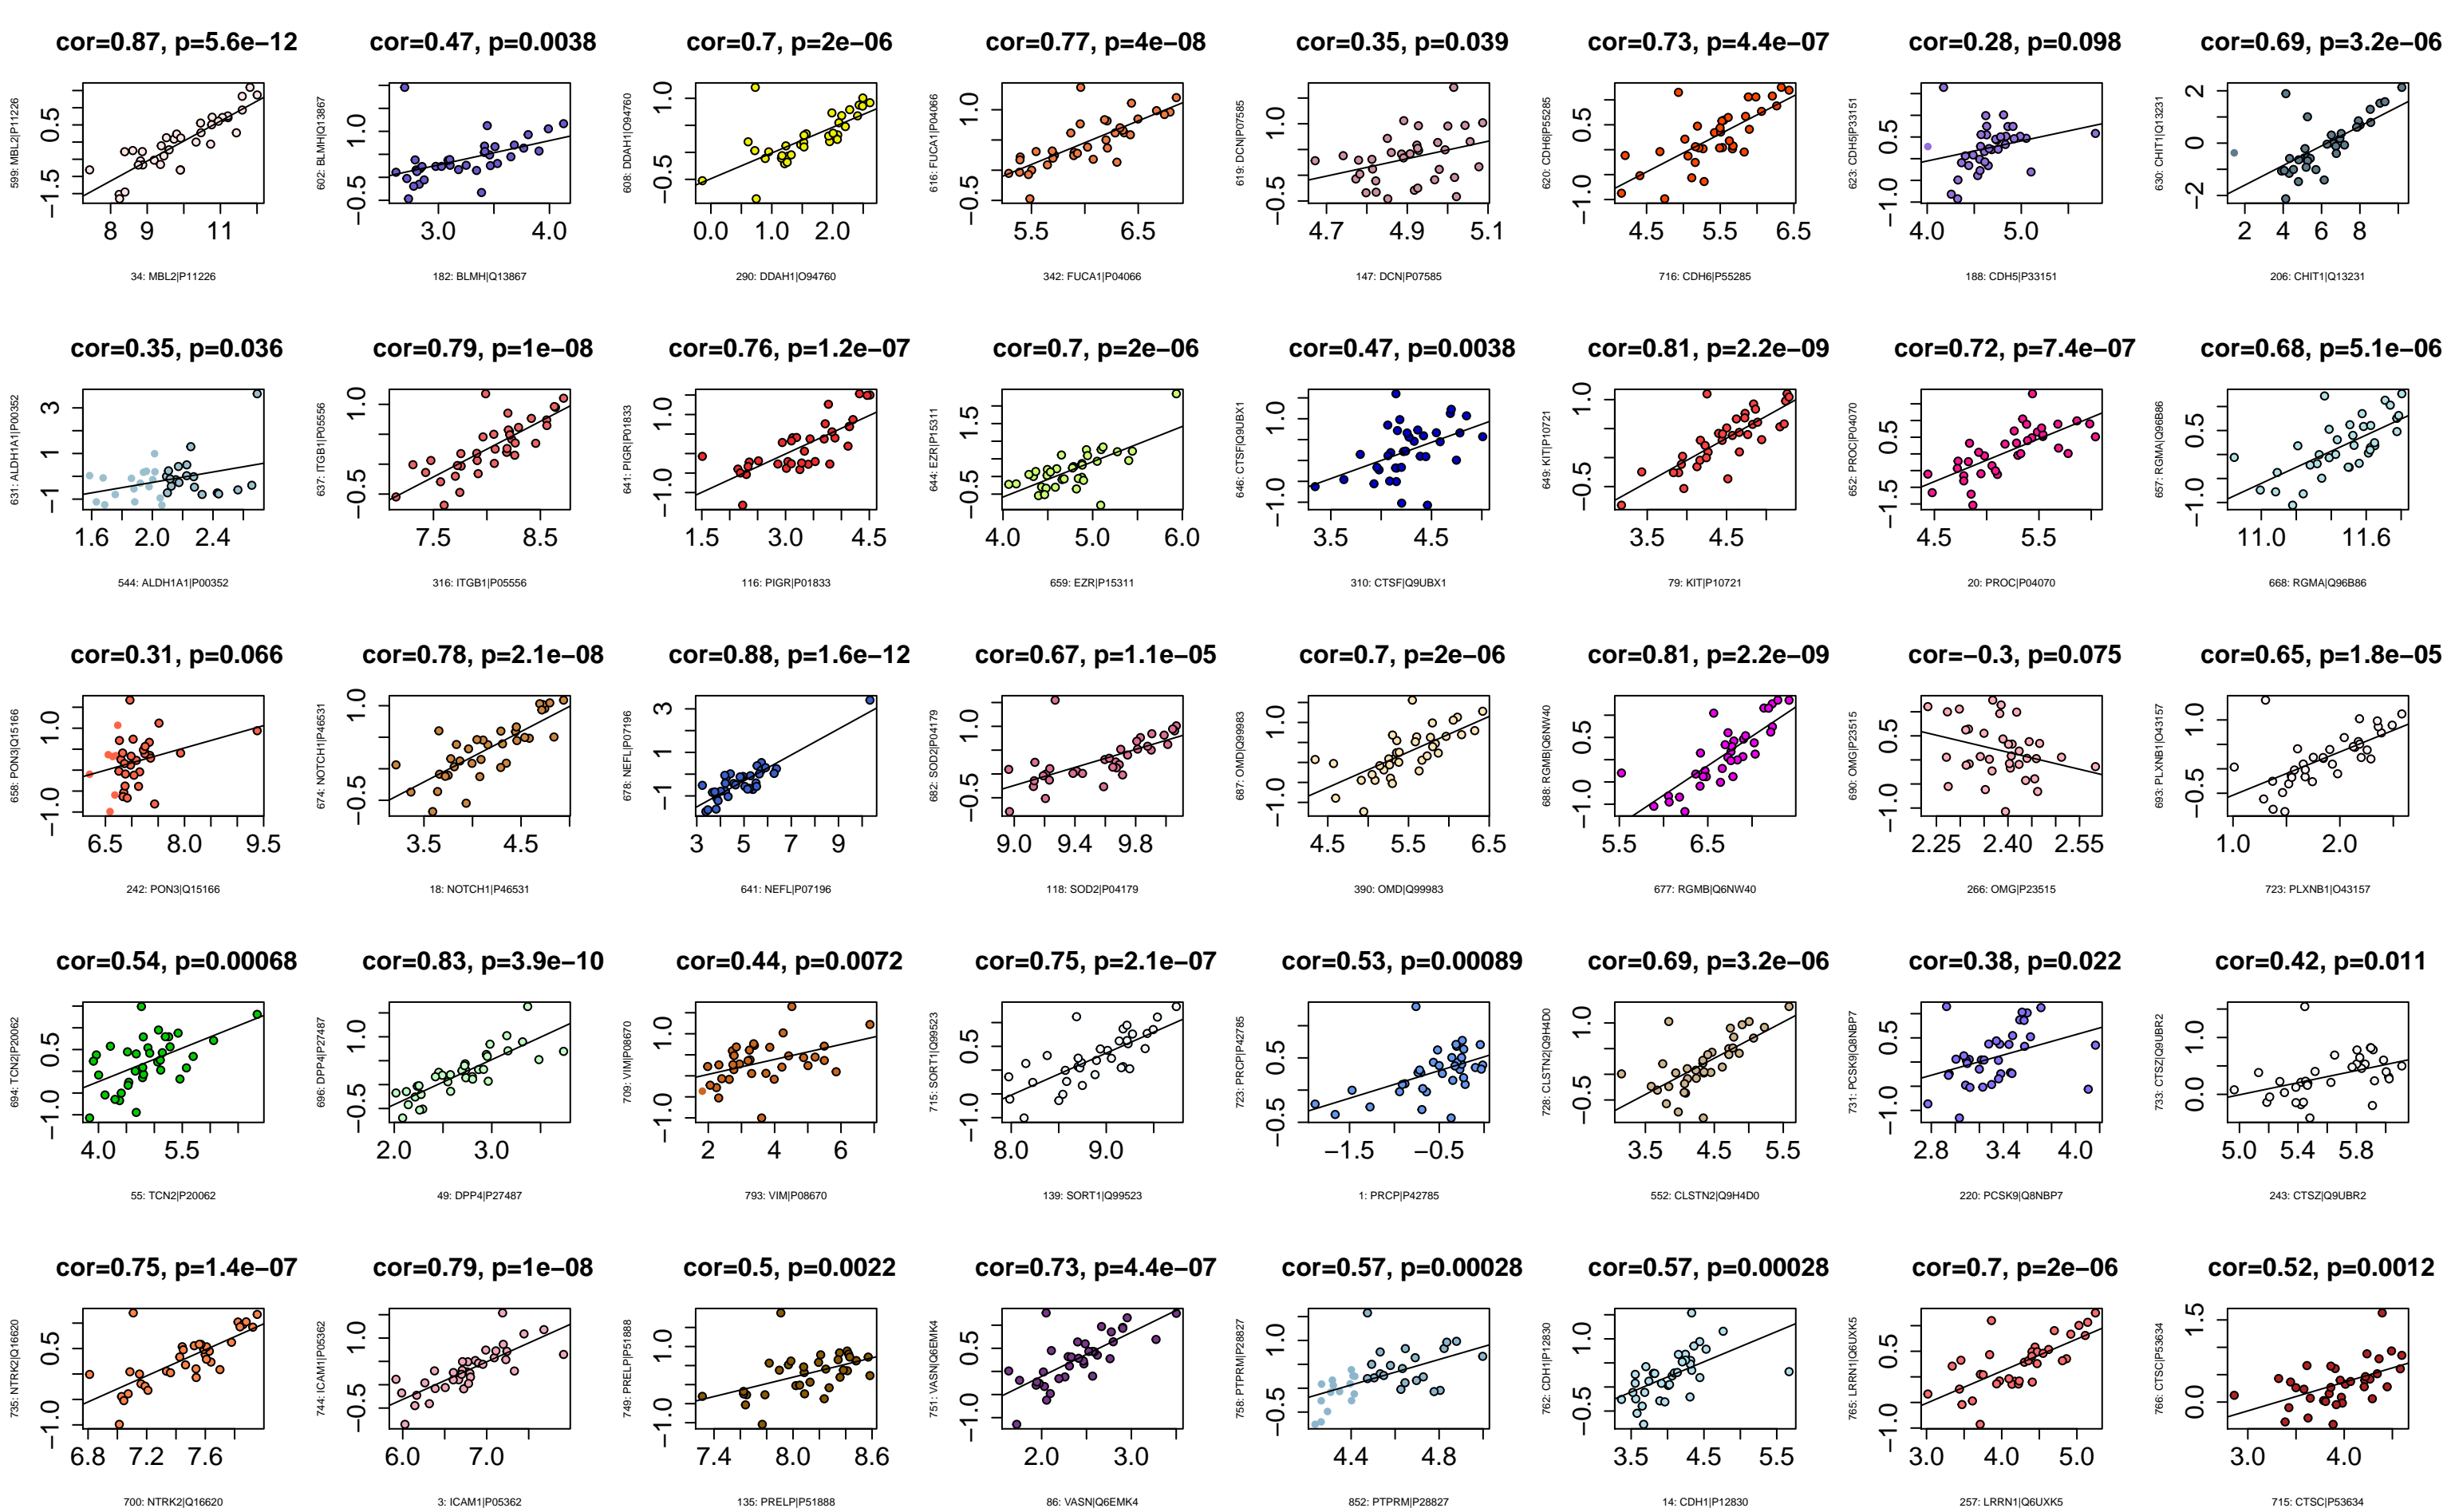

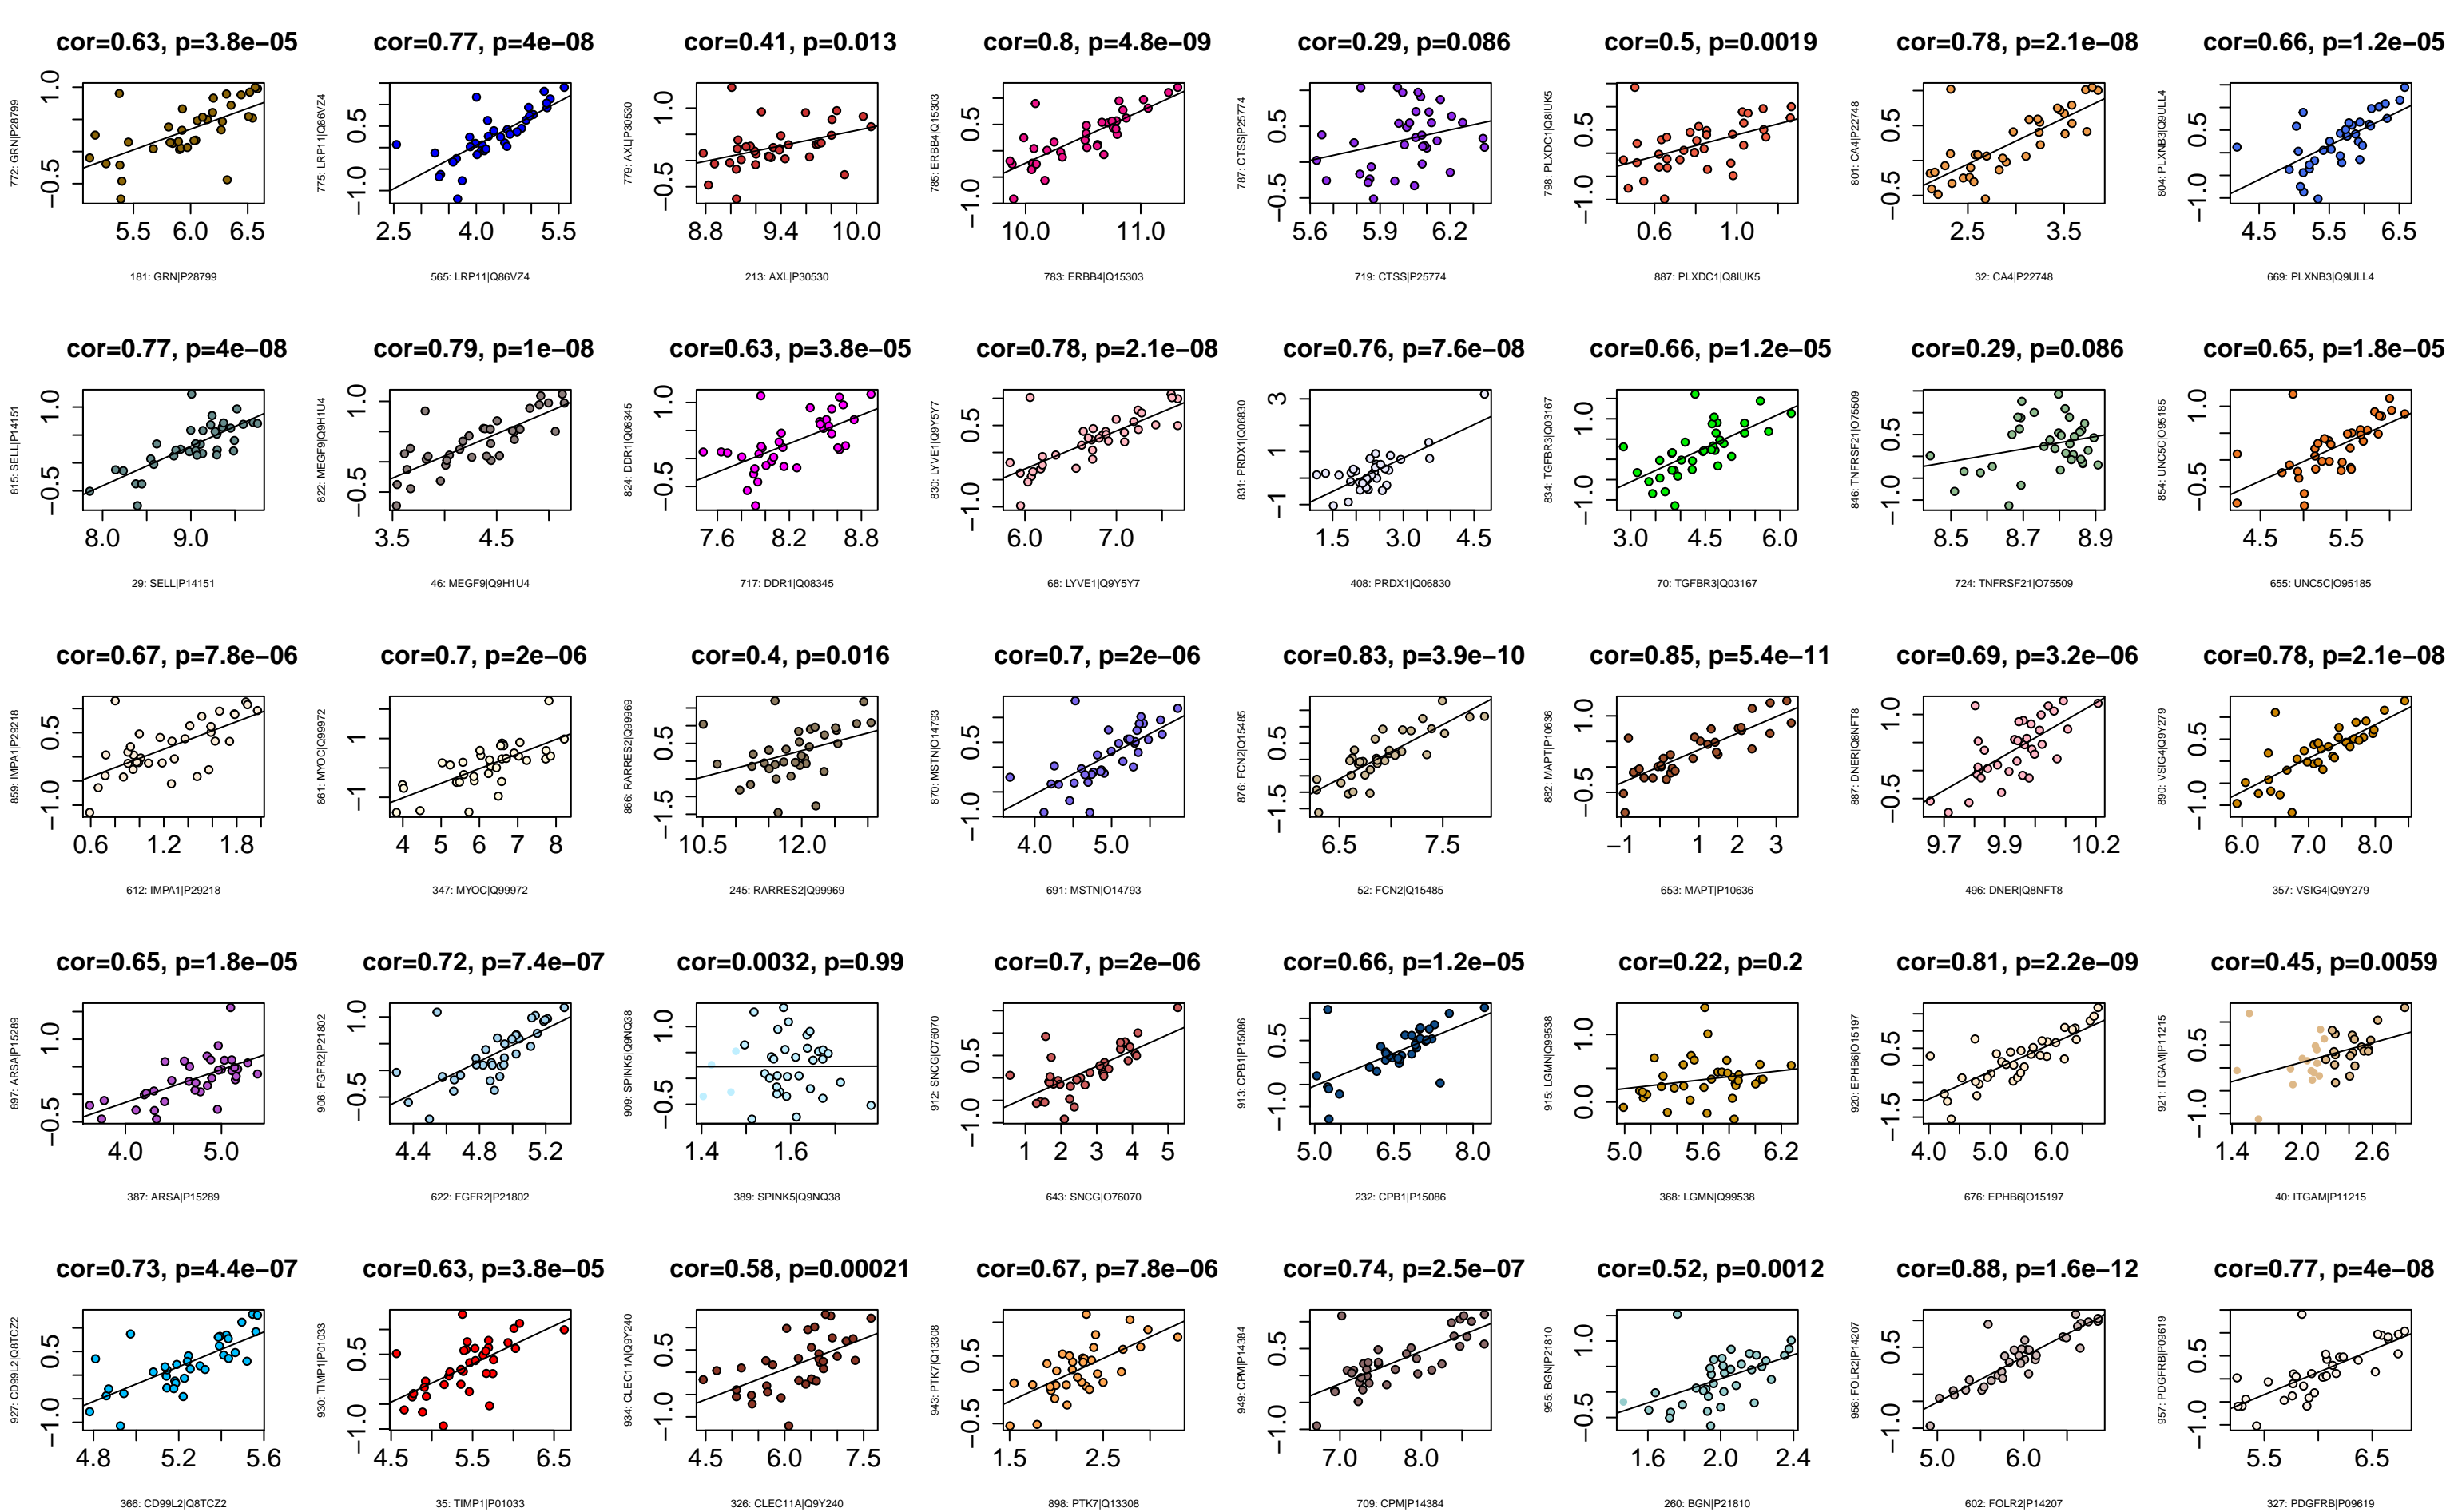

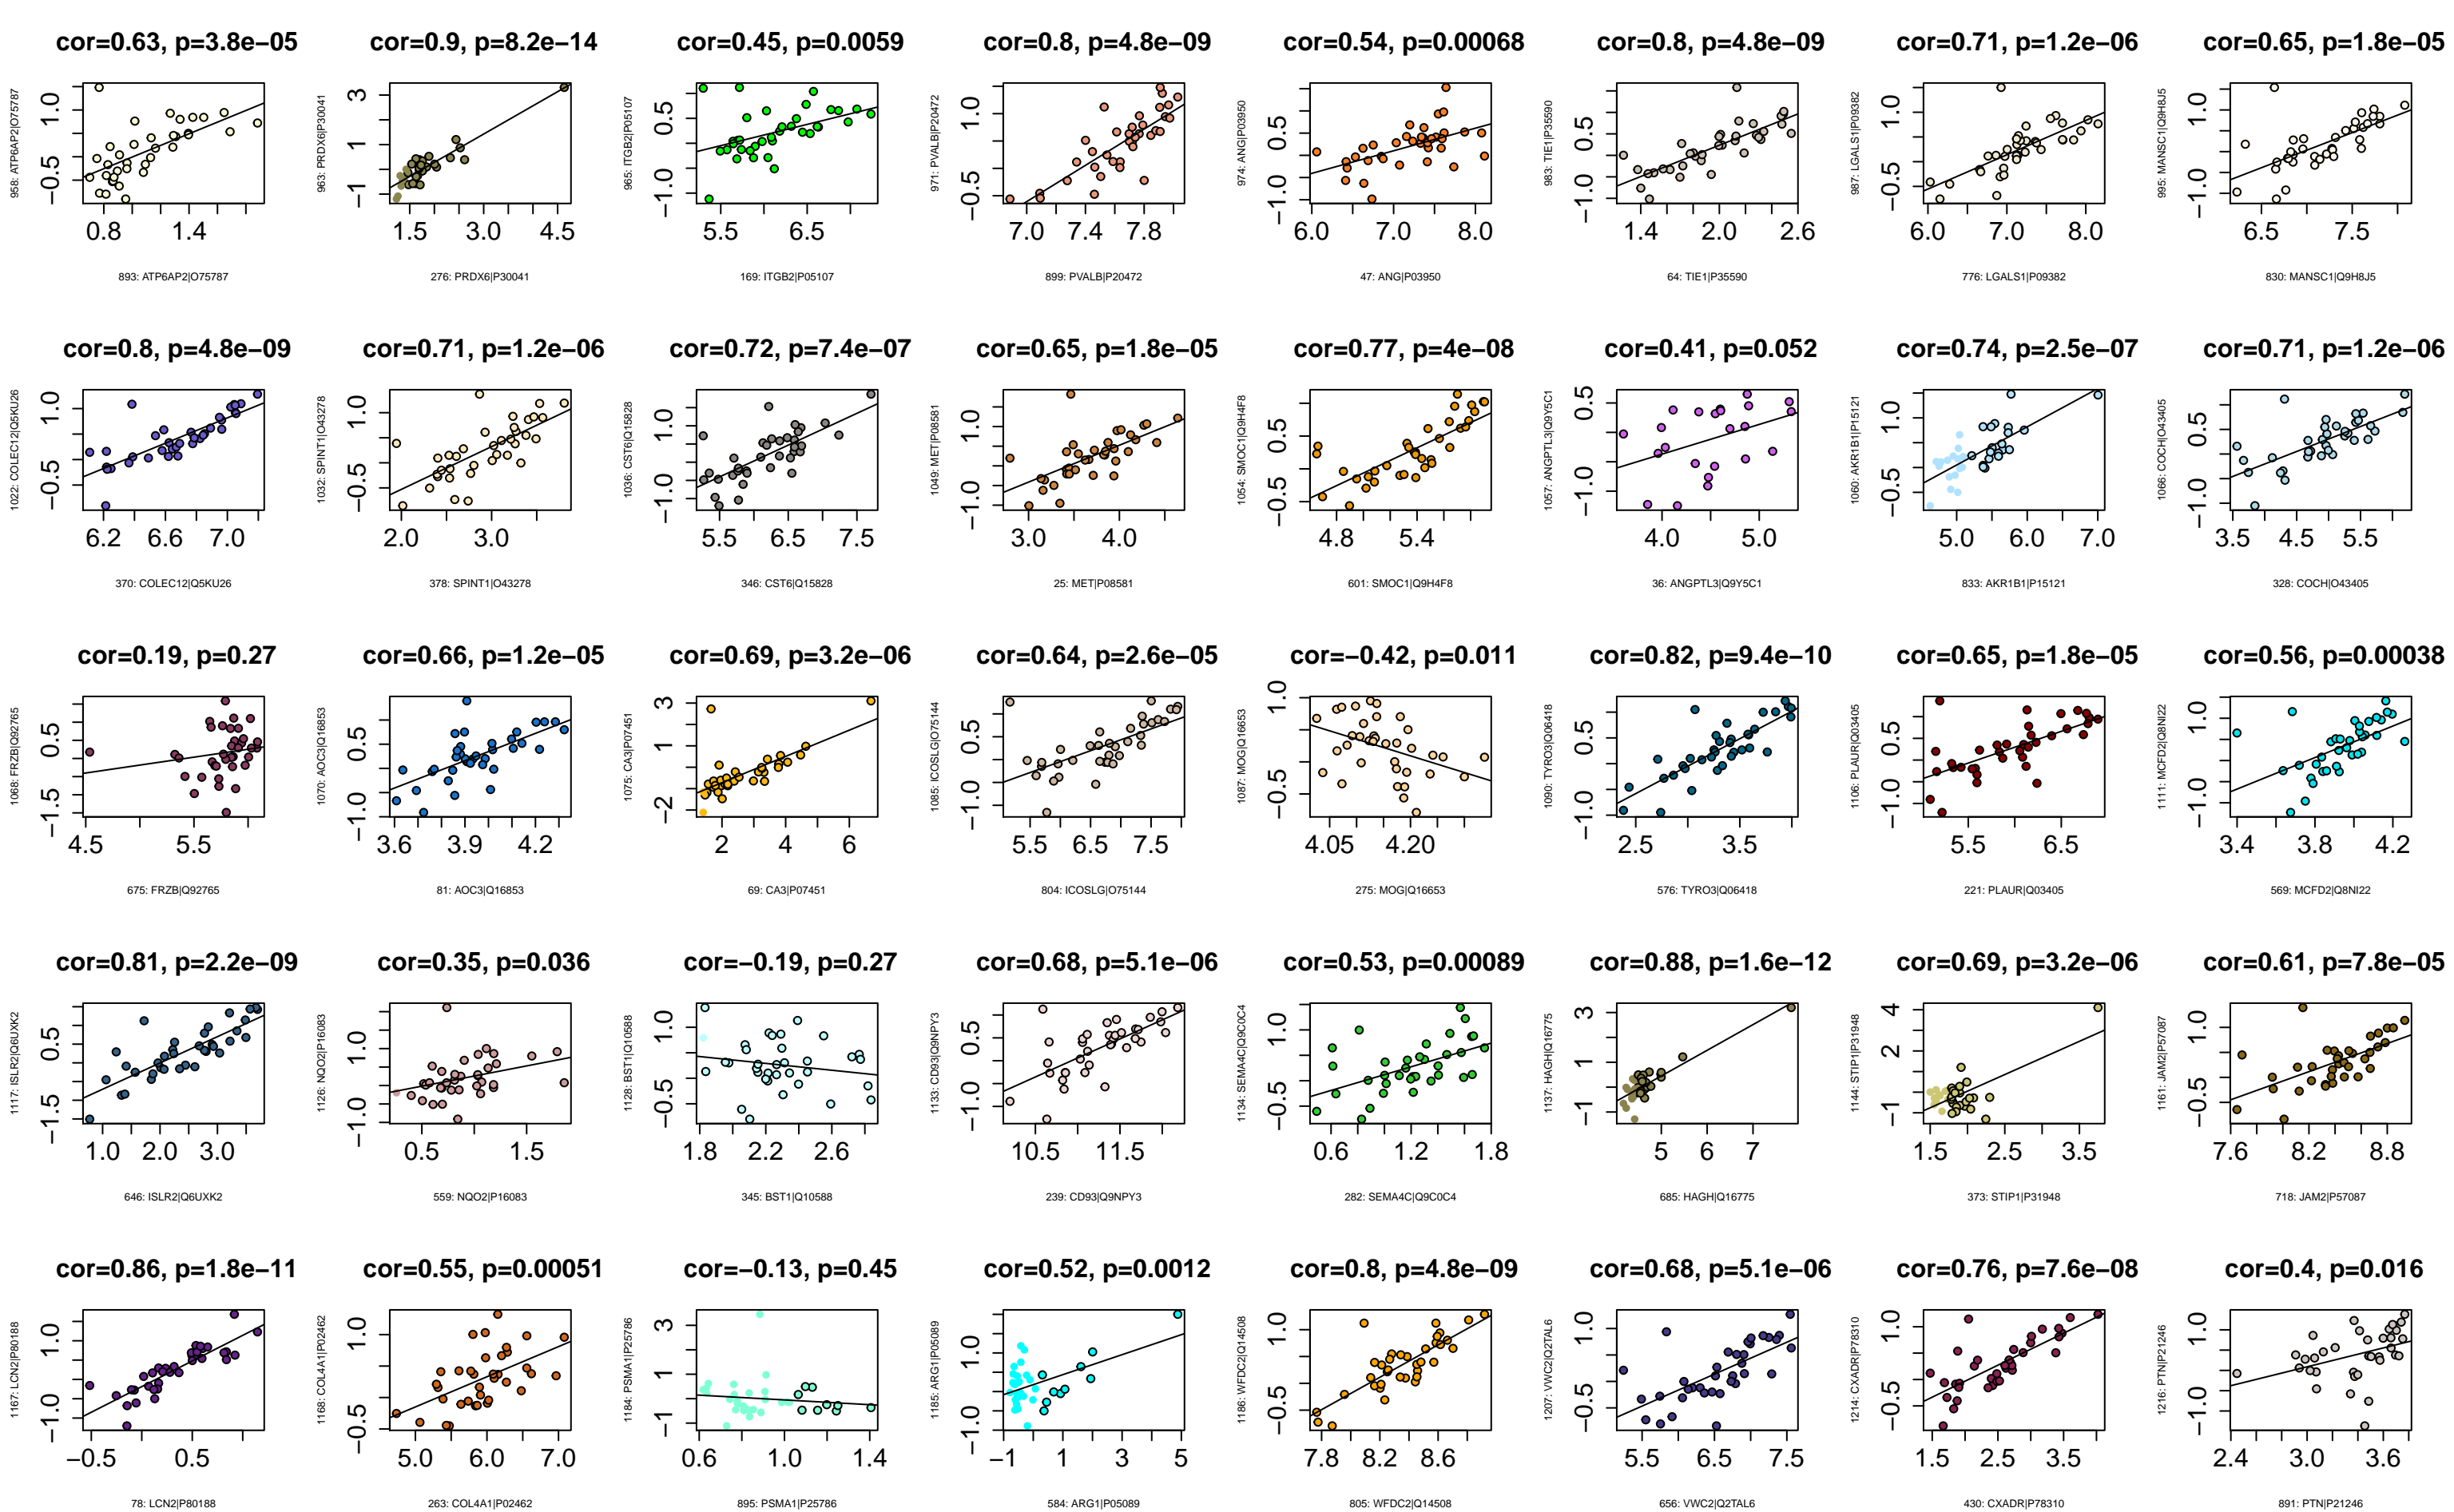

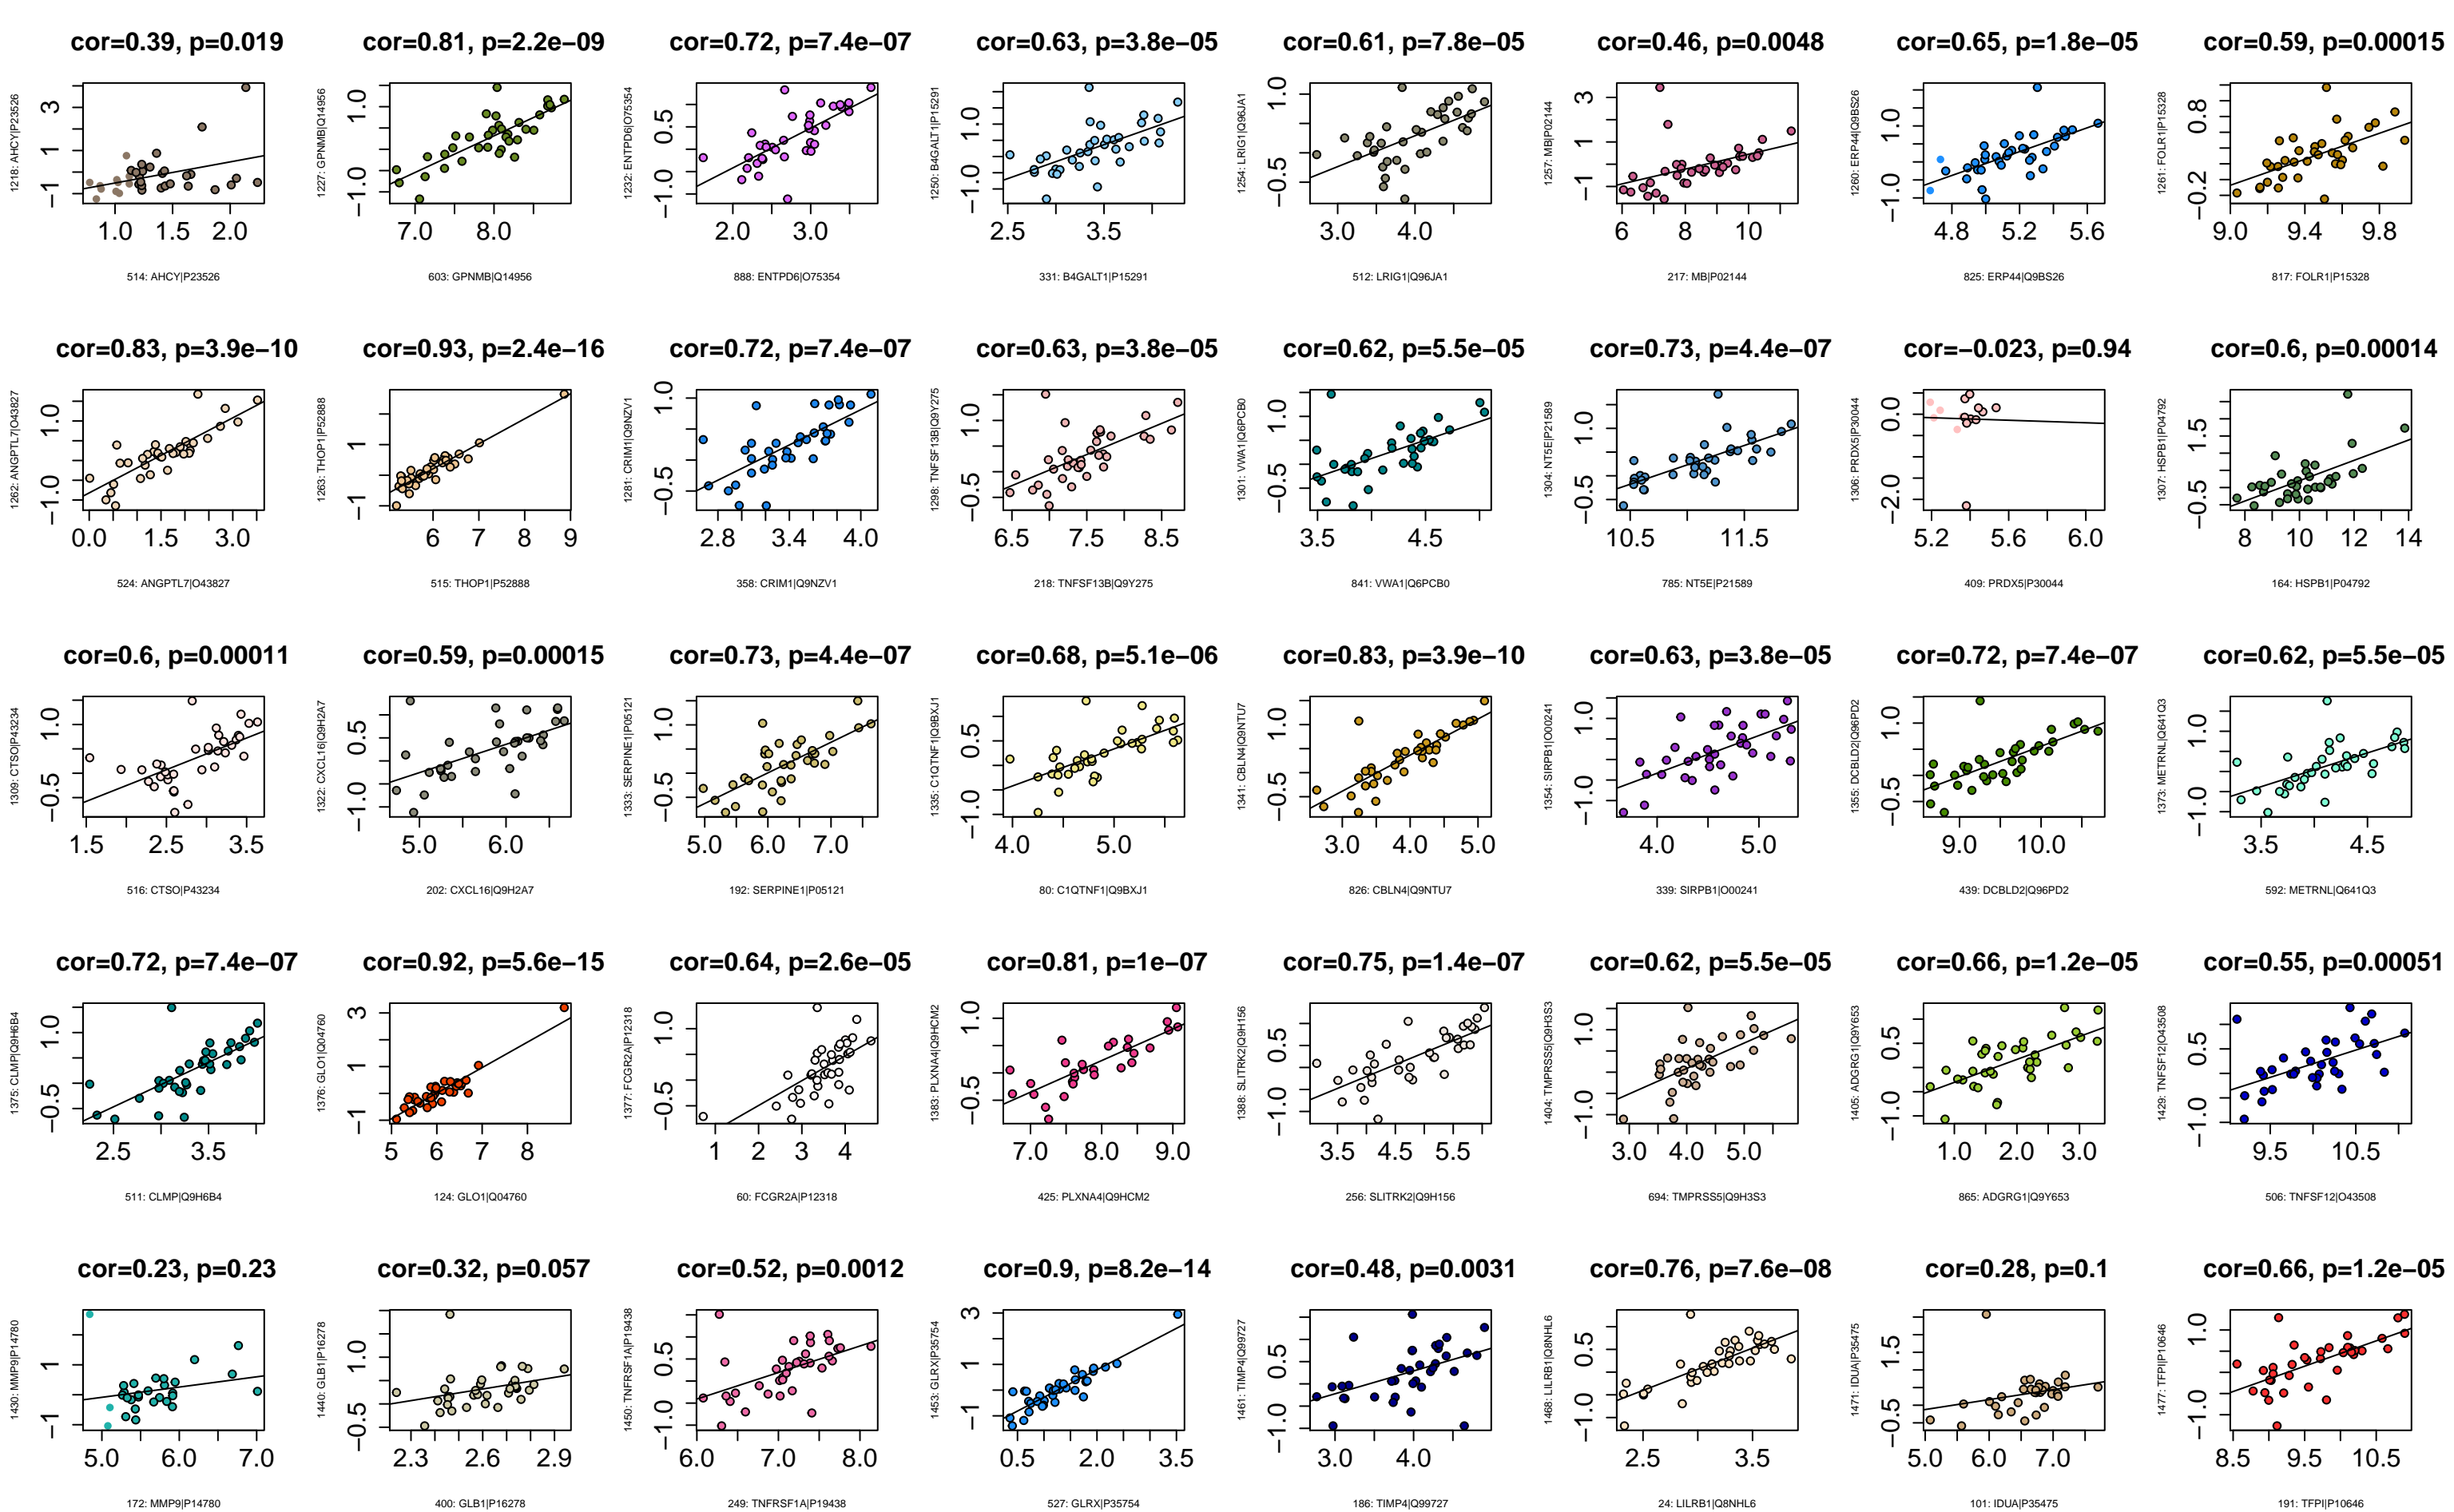

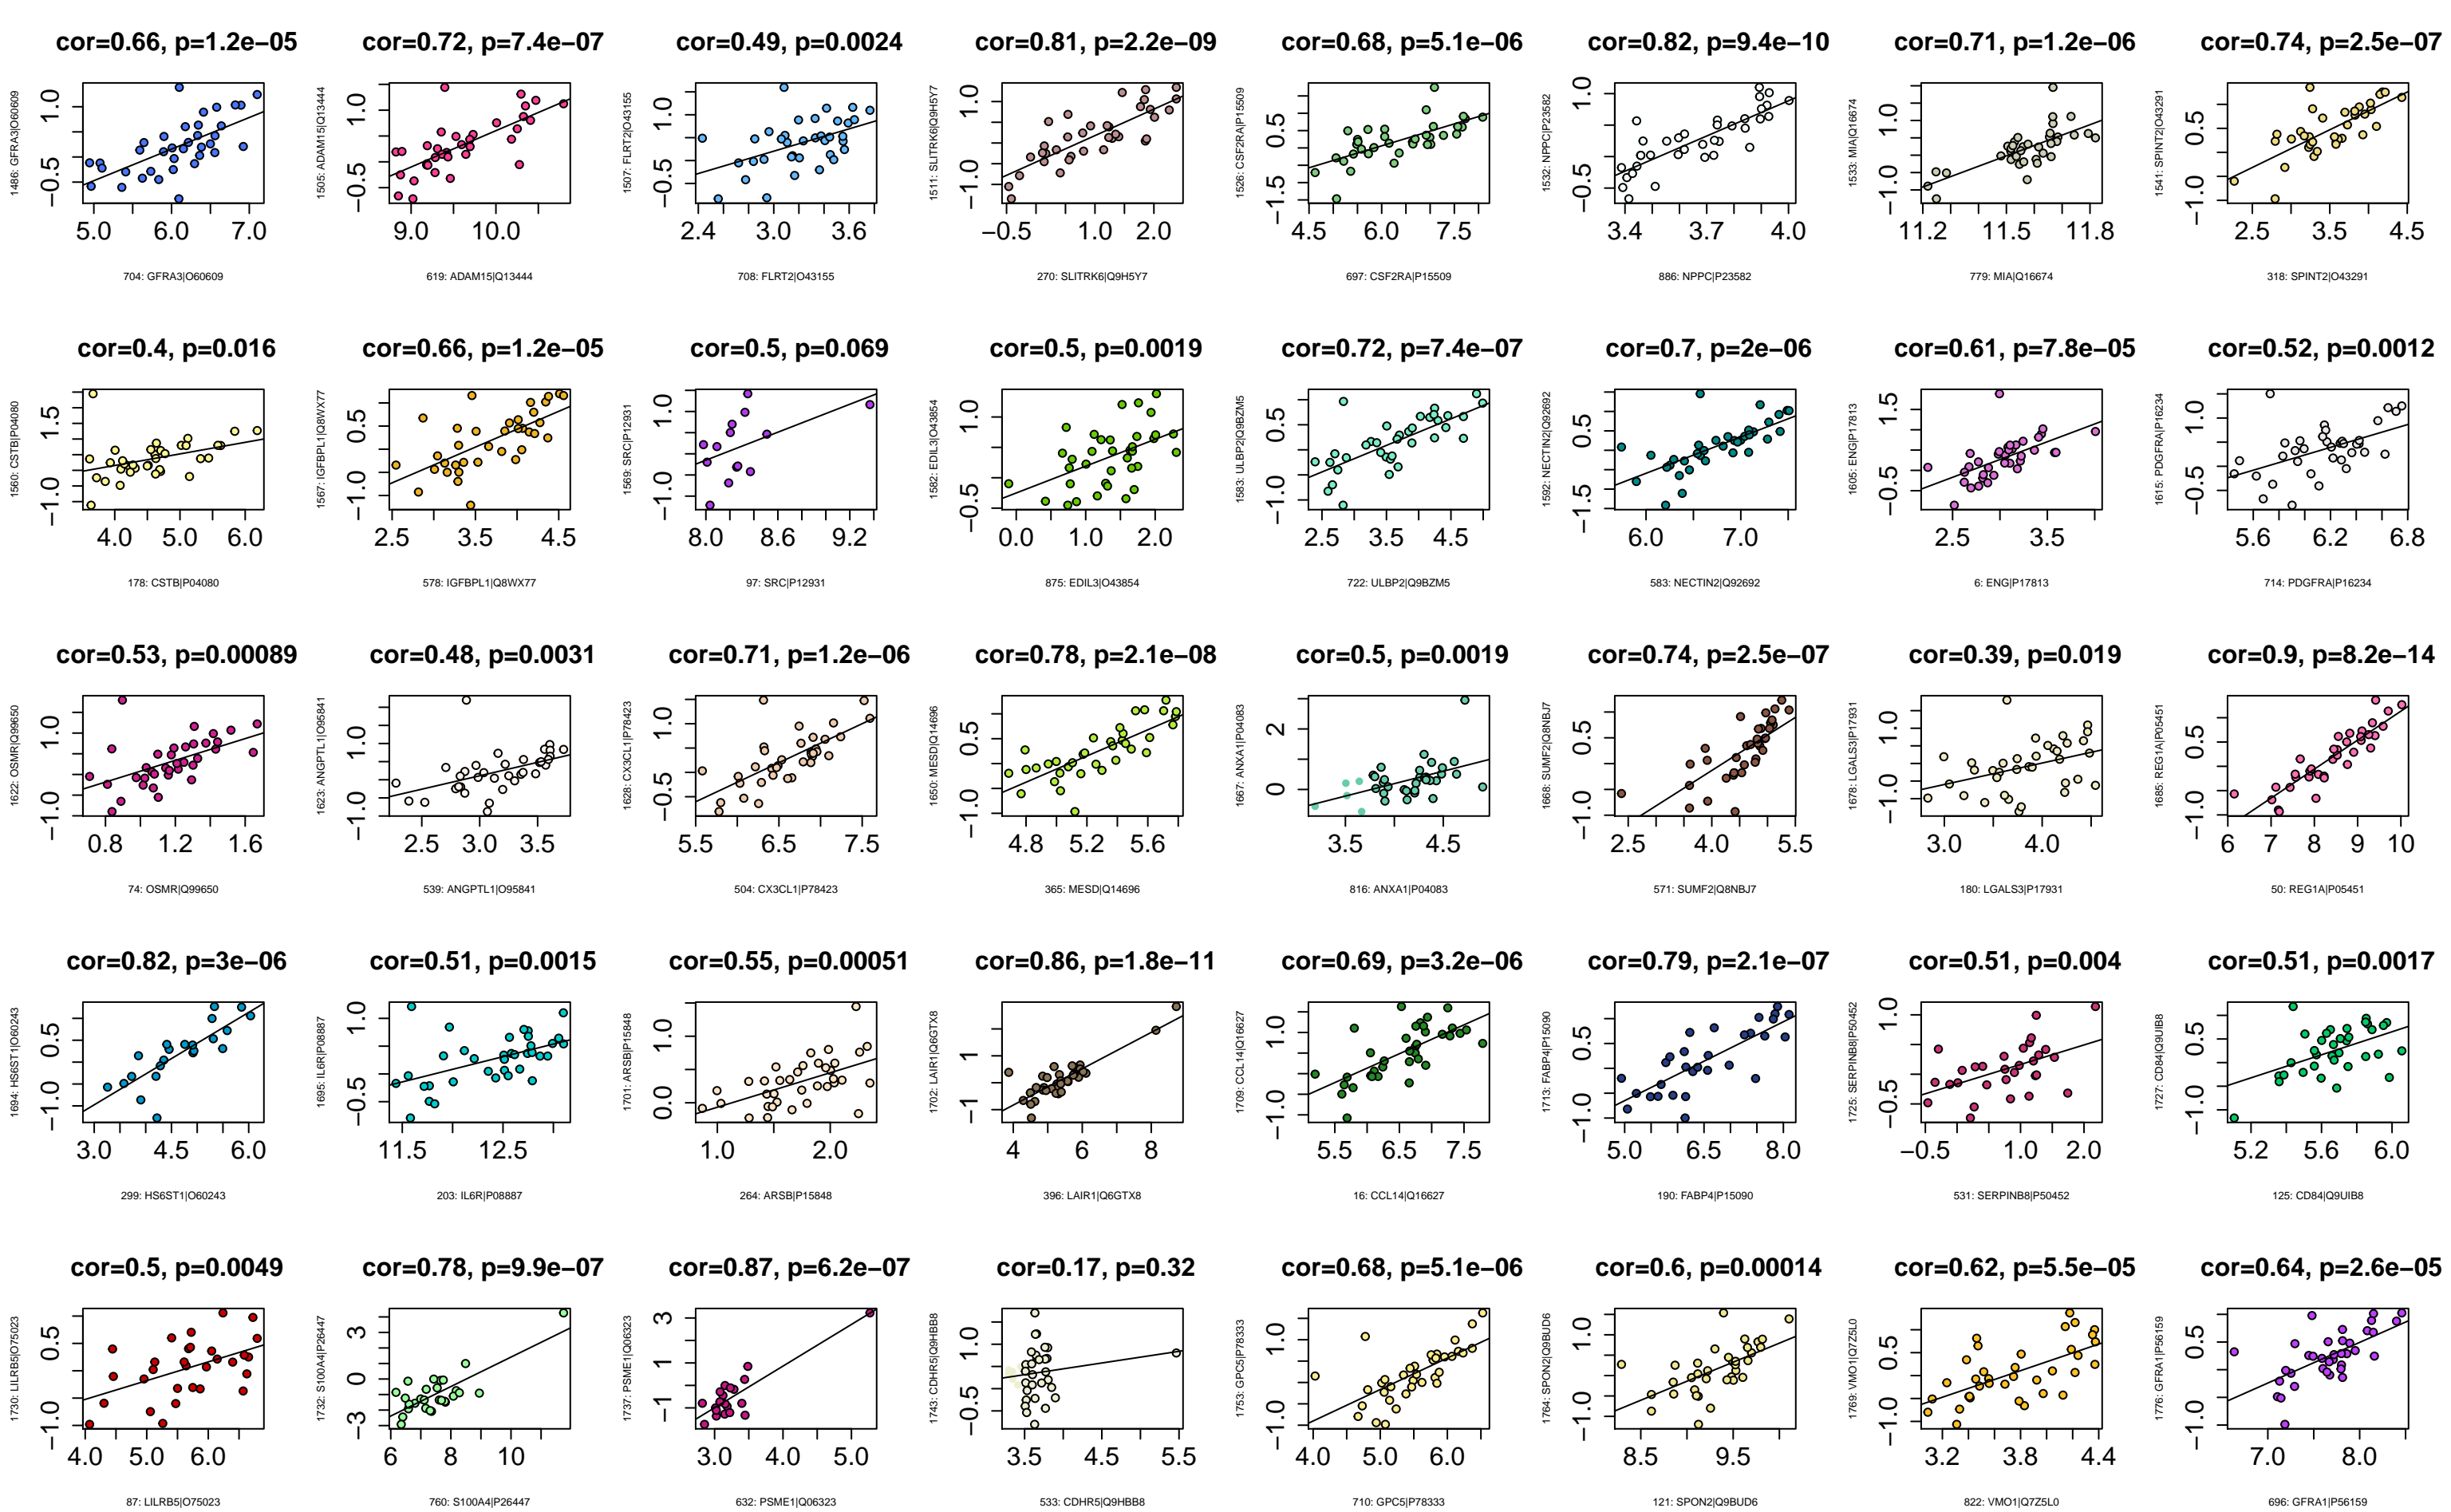



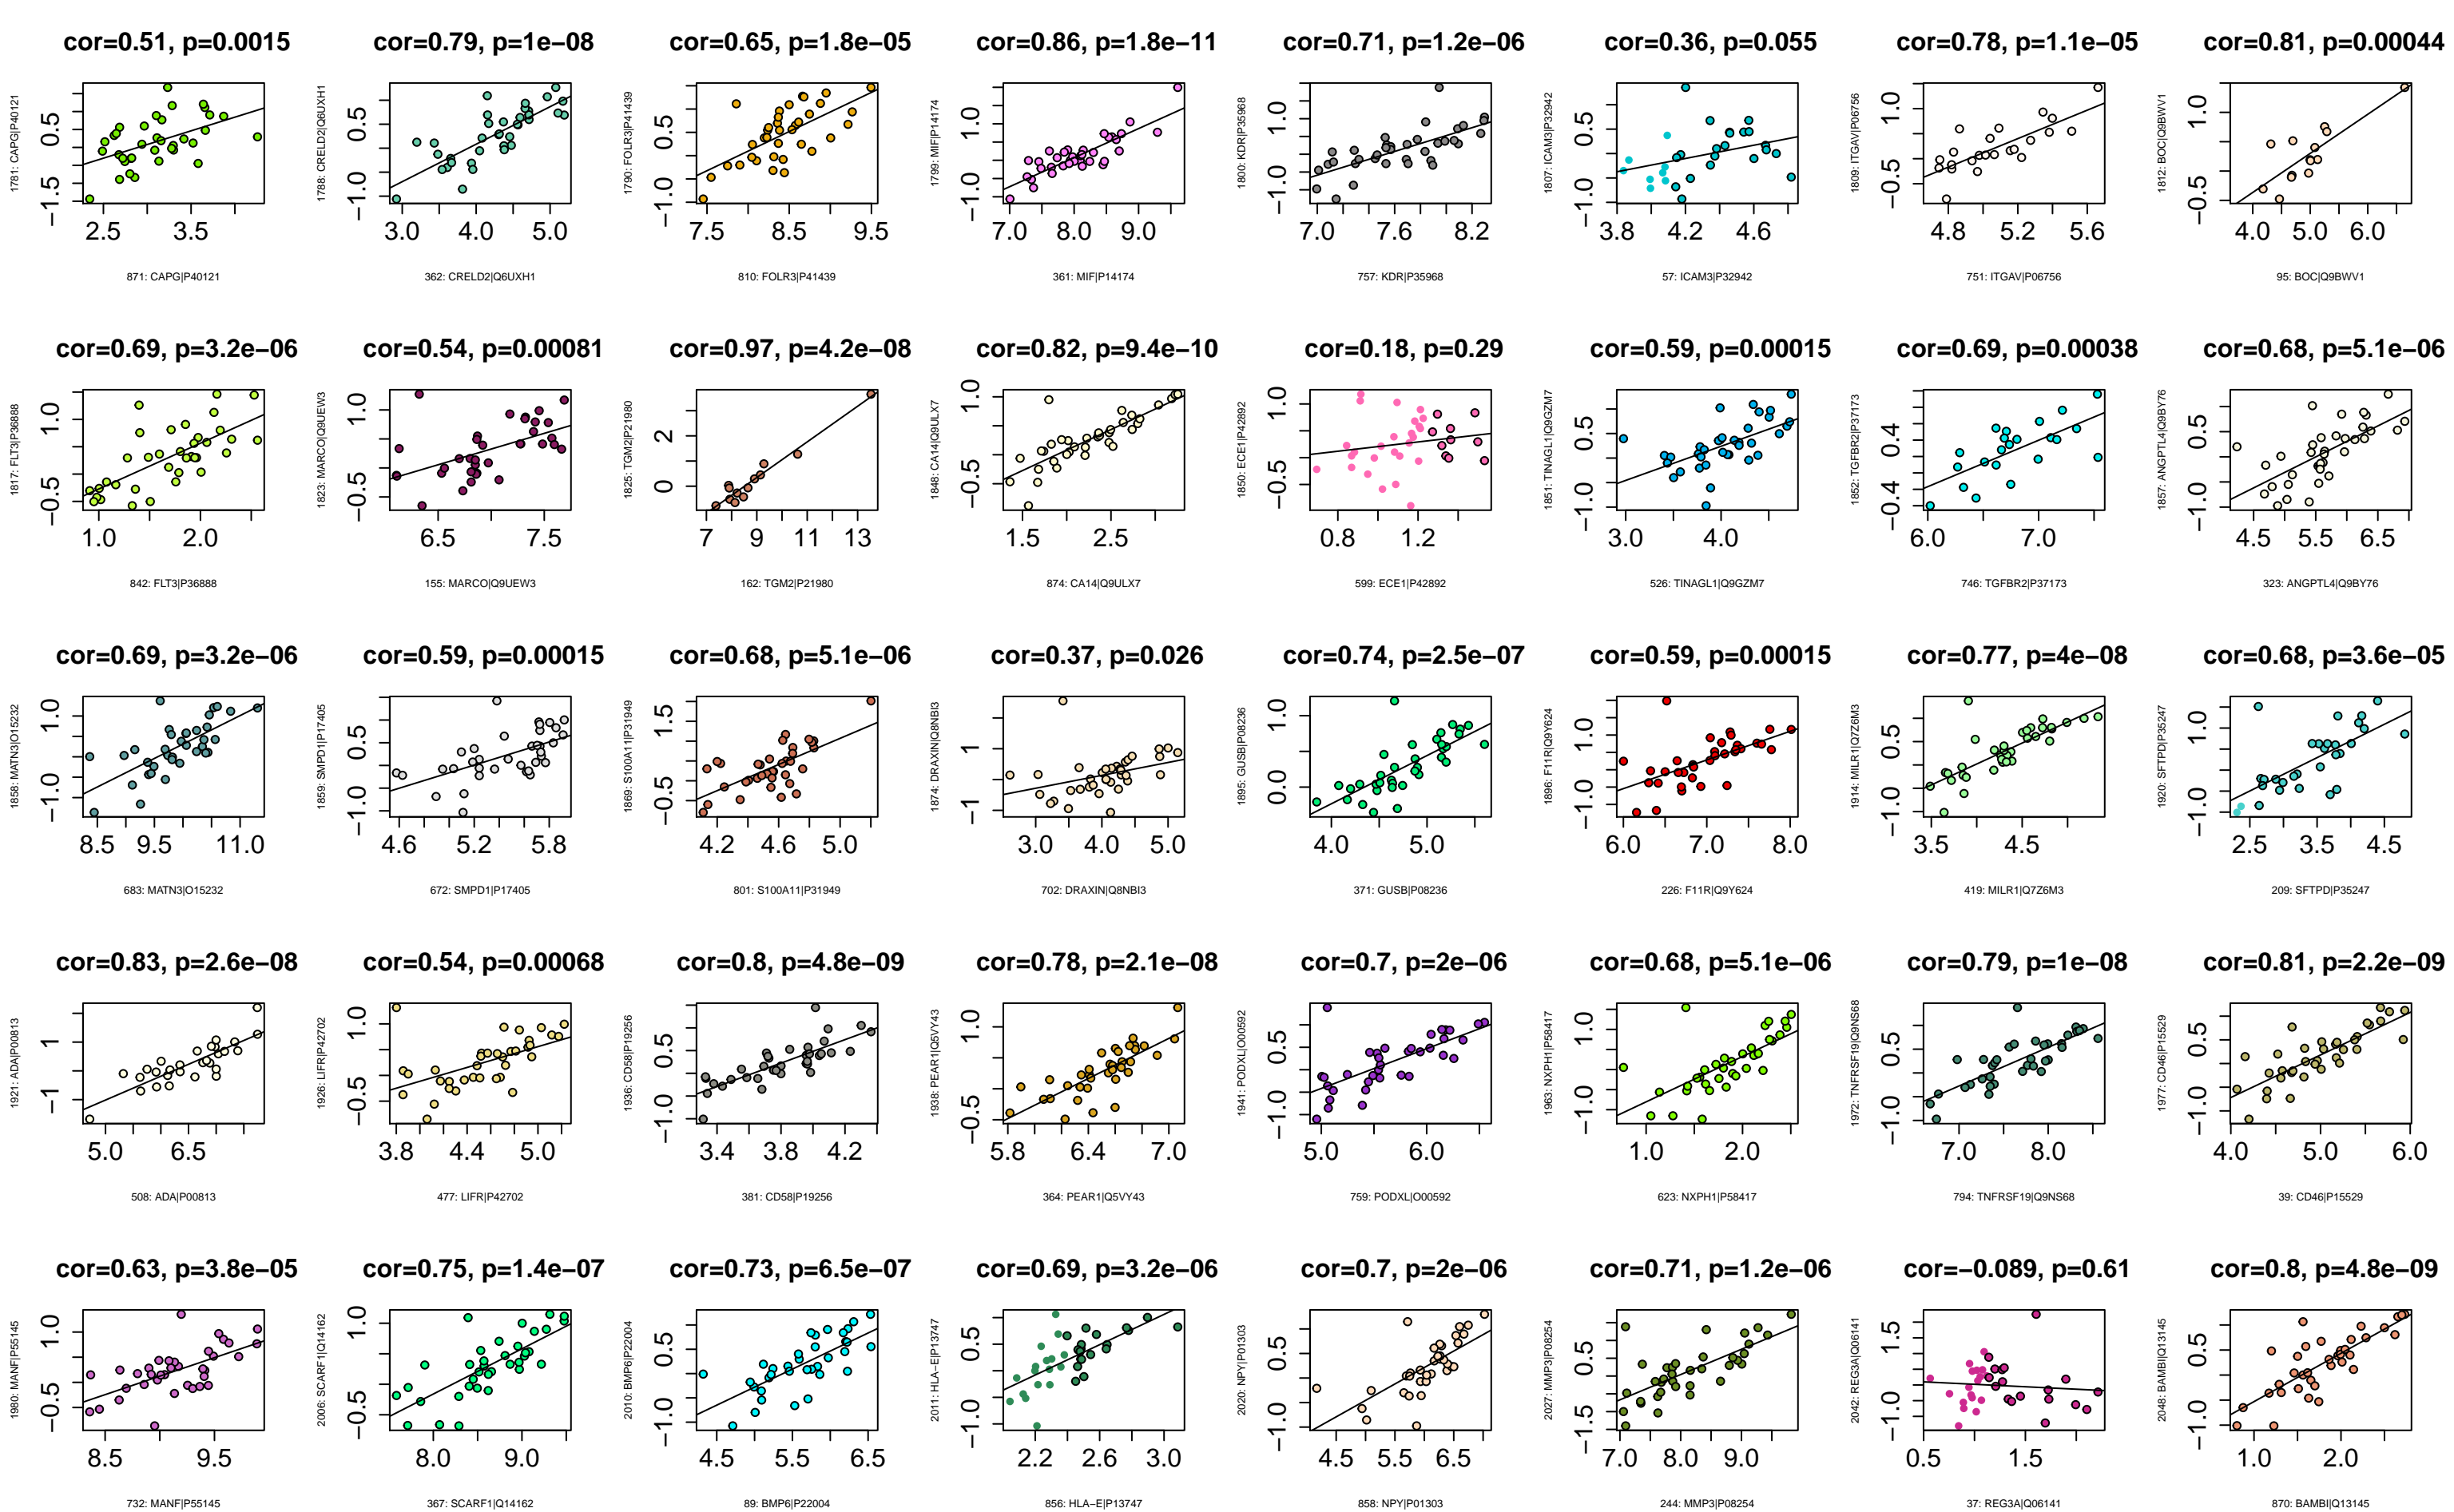

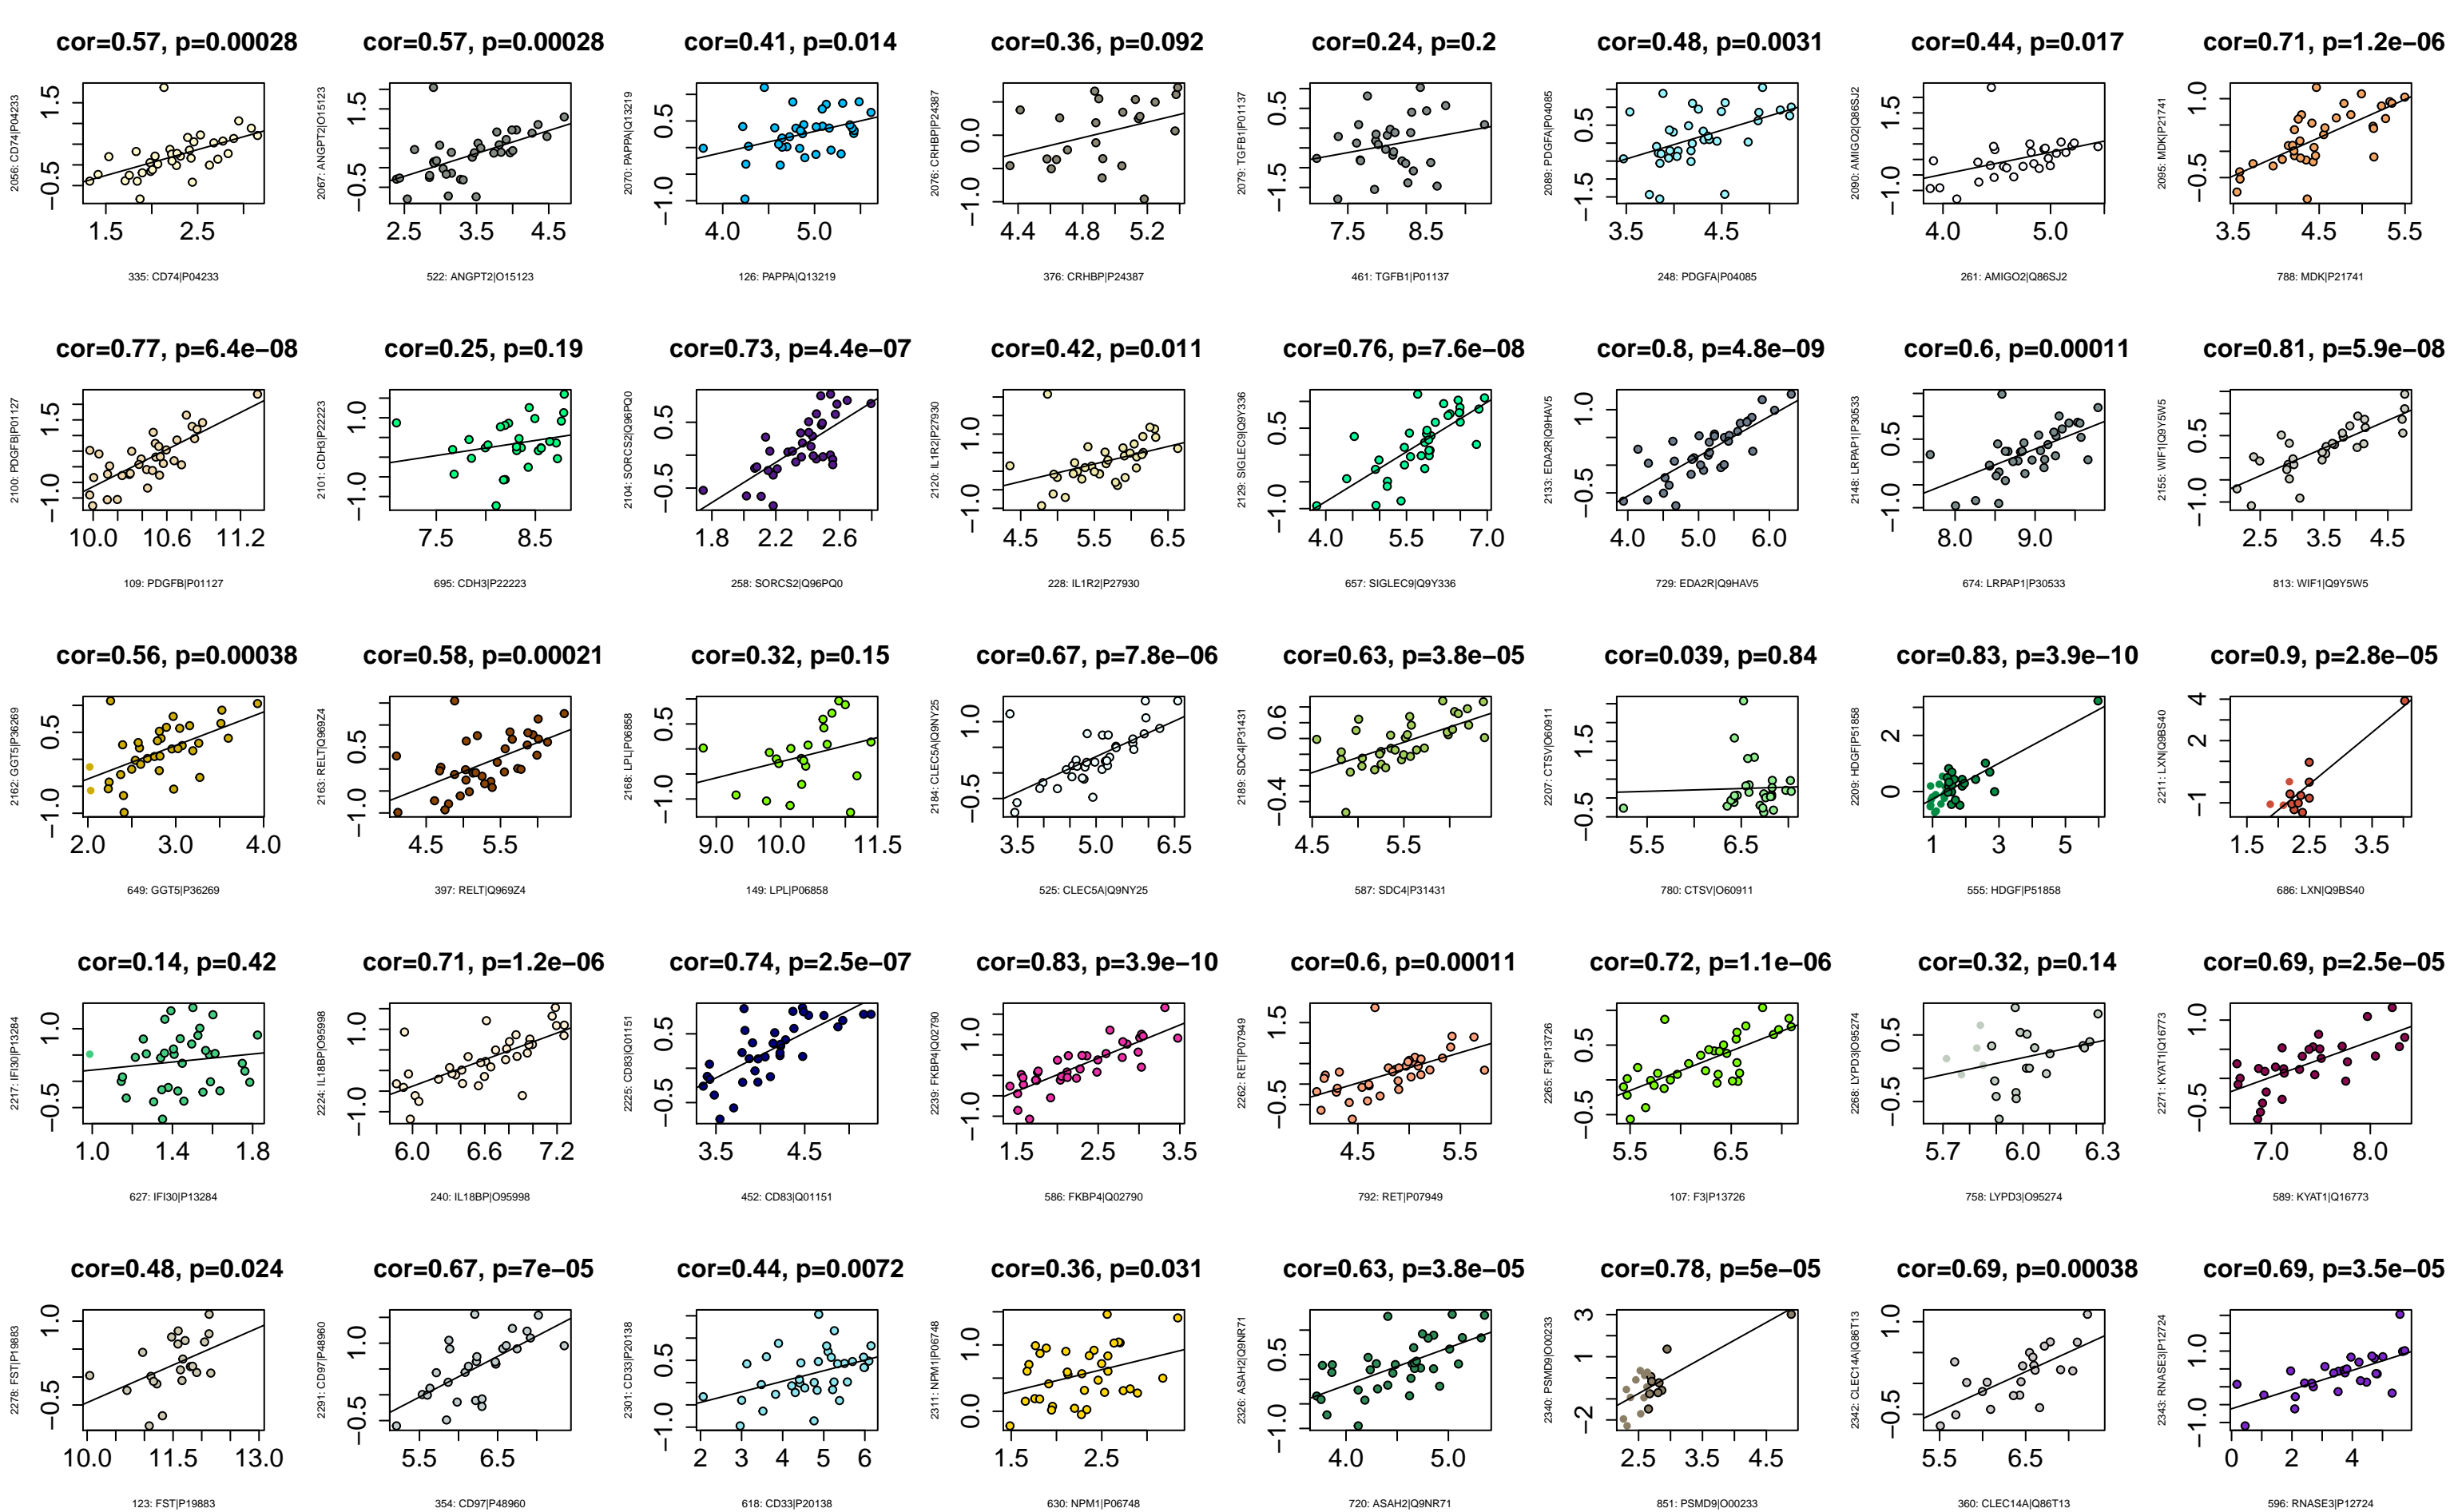

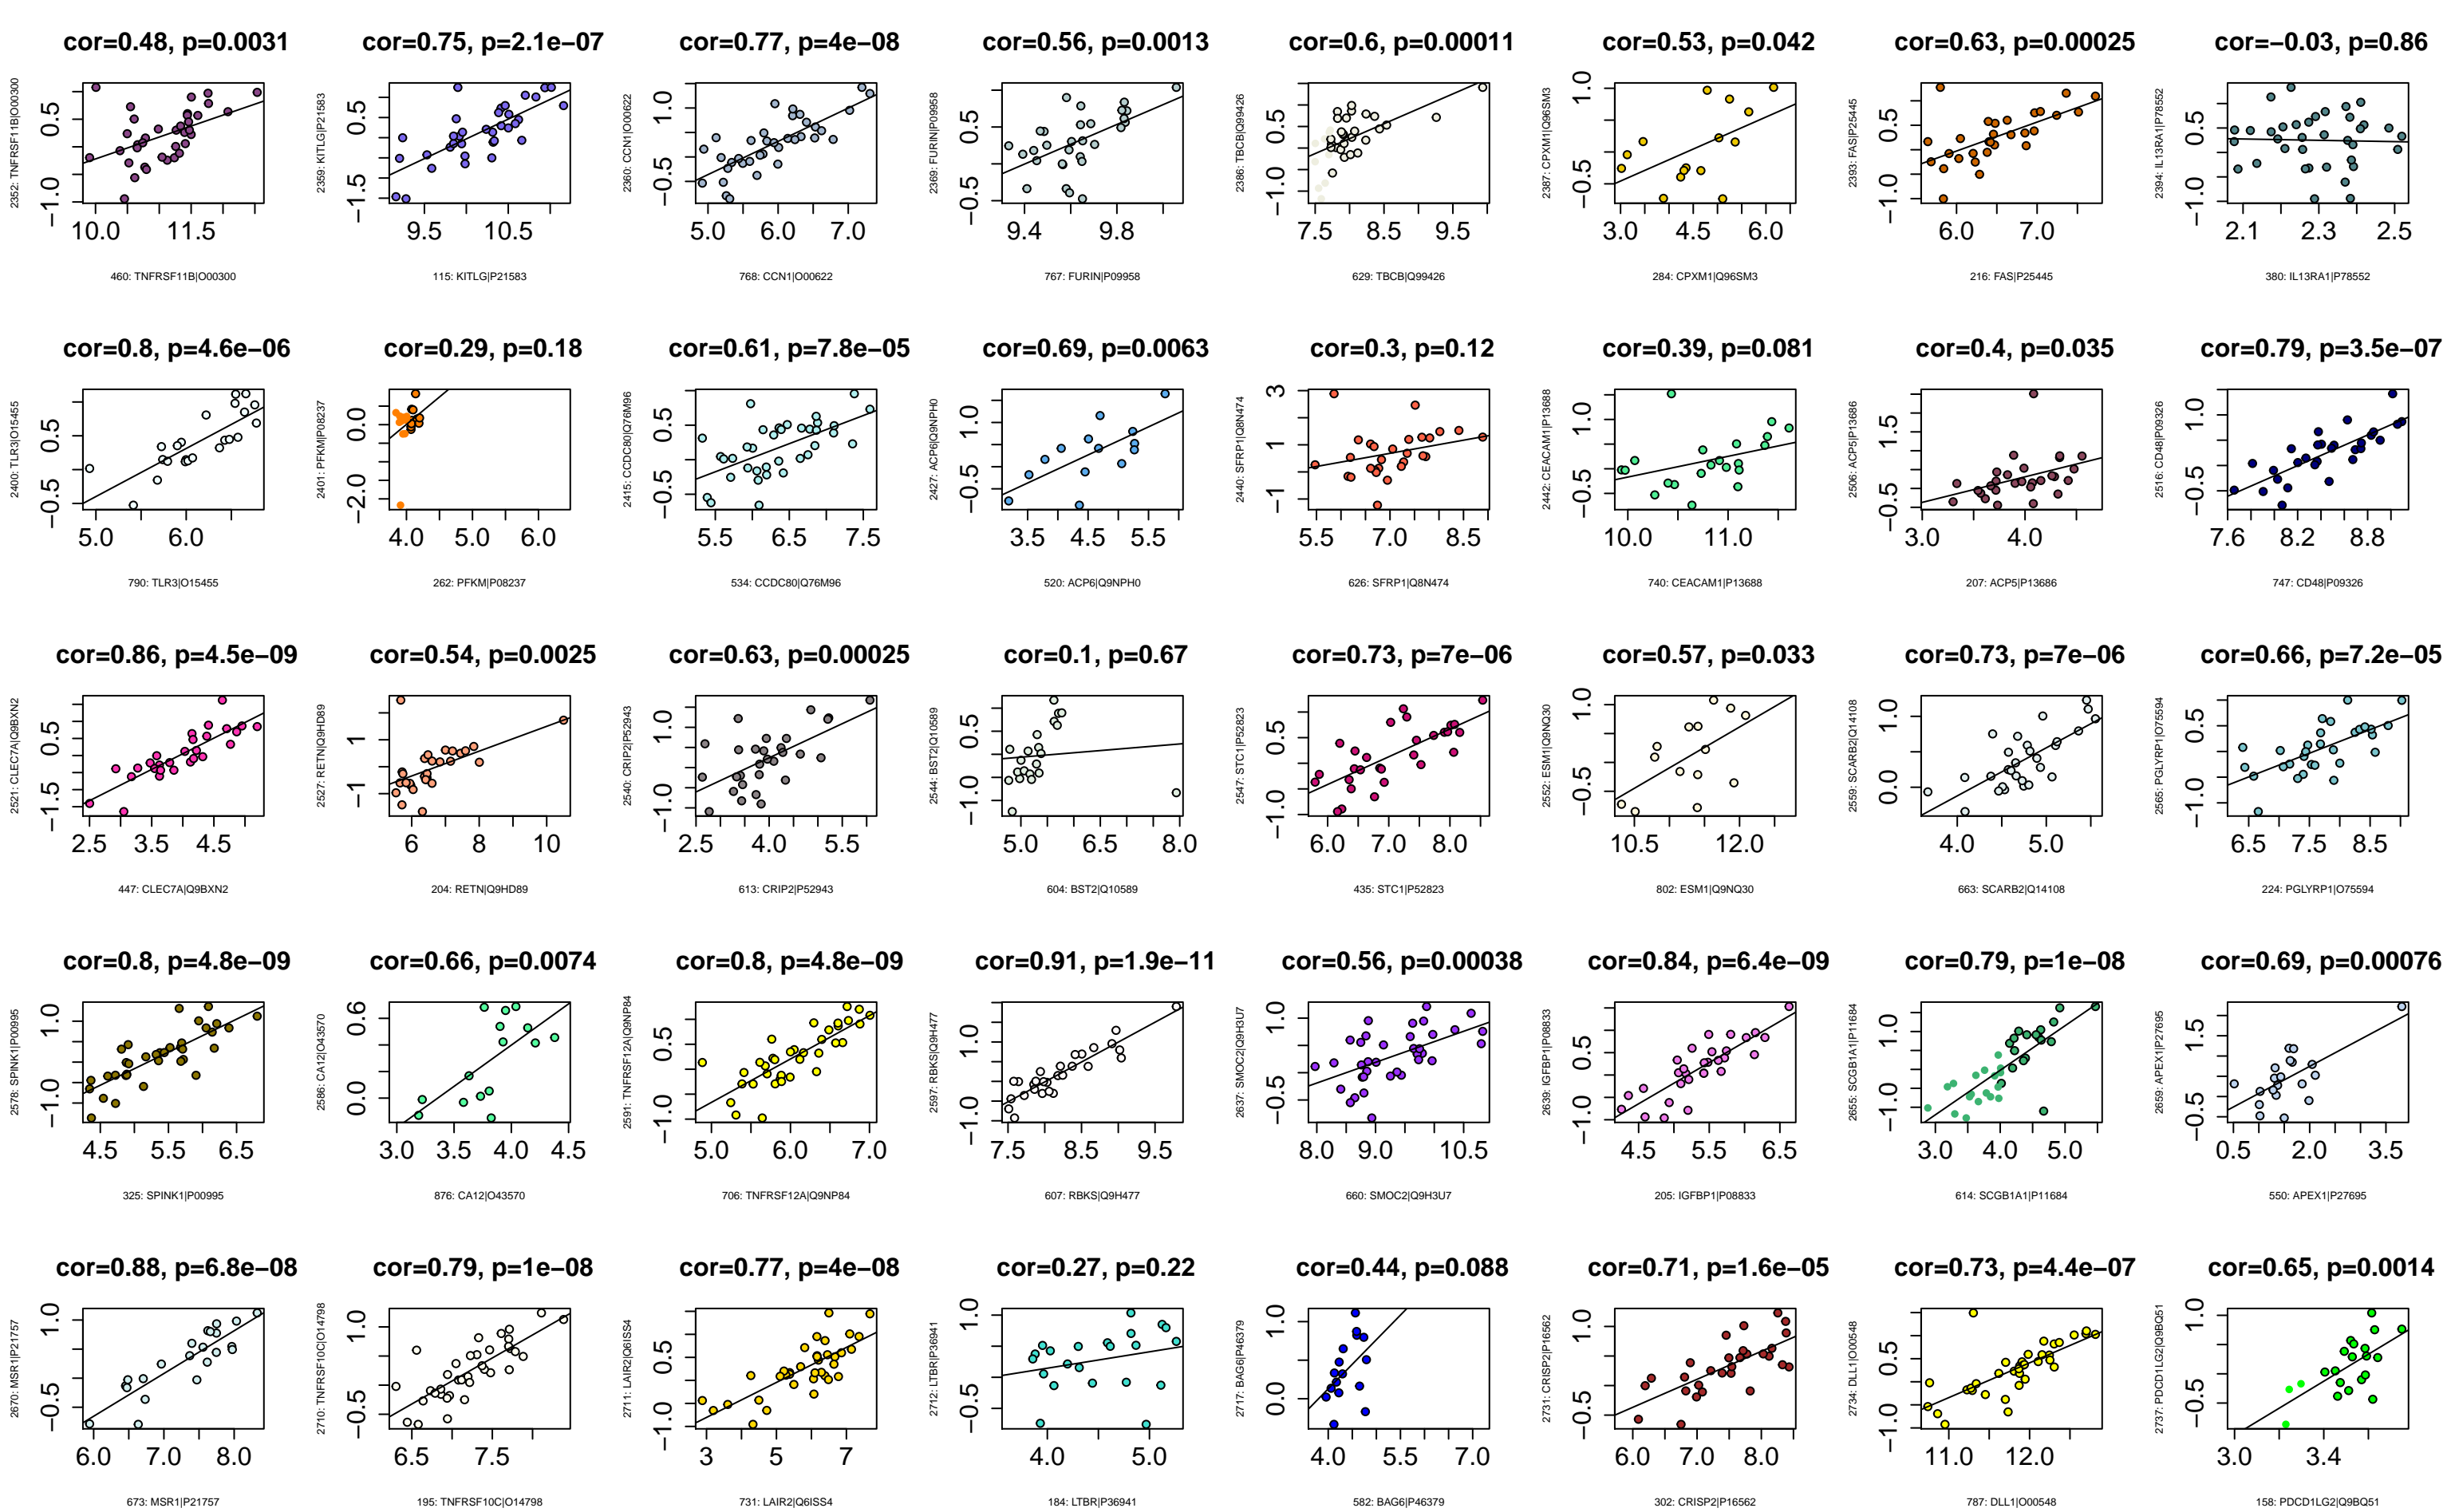

**cor=0.55, p=0.051**

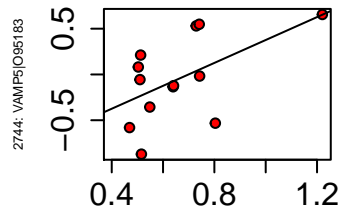

294: VAMP5|Q95183

**cor=0.5, p=0.0019**

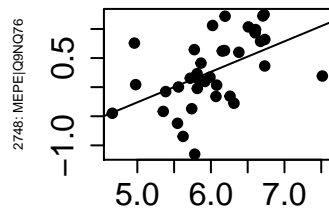

253: MEPE|Q9NQ76

**cor=0.56, p=0.03**

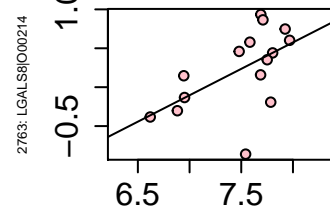

687: LGALS8|O00214

**cor=0.66, p=7.2e-05**

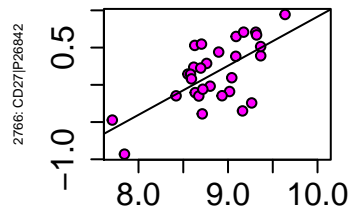

781: CD27|P26842

**cor=0.58, p=0.0012**

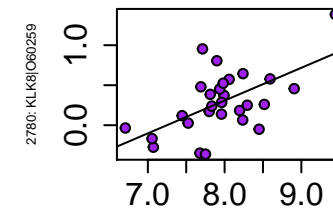

756: KLK8|O60259

**cor=0.71, p=0.003**

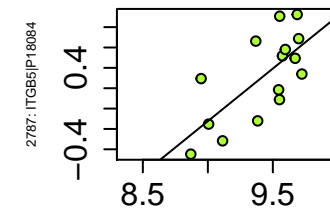

775: ITGB5|P18084

**cor=0.84, p=8.9e-05**

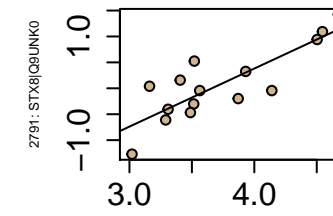

880: STX8|Q9UNK0

**cor=0.55, p=0.0016**

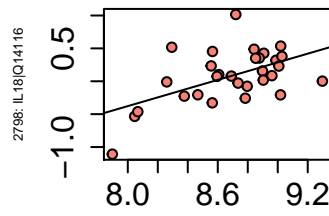

472: IL18|Q14116

**cor=0.45, p=0.041**

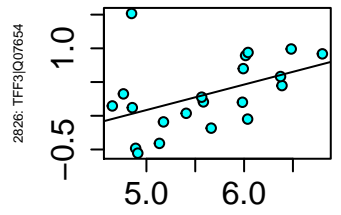

176: TFF3|Q07654

**cor=0.79, p=0.00077**

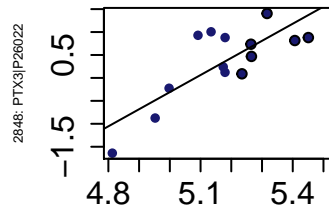

141: PTX3|P26022

**cor=0.74, p=8.3e-05**

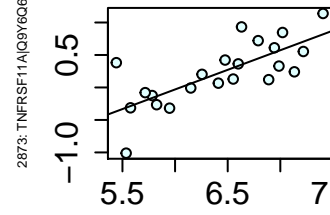

102: TNFRSF11A|Q9Y6Q6

**cor=0.58, p=0.00097**

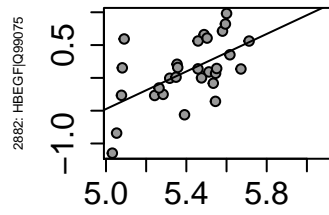

152: HBEGF|Q99075

**cor=0.76, p=4.1e-05**

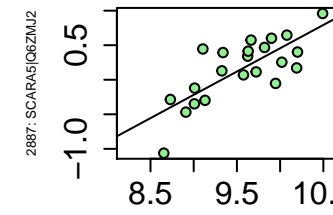

698: SCARA5|Q6ZMJ2

**cor=0.87, p=1.2e-05**

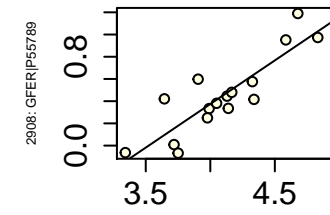

831: GFER|P55789

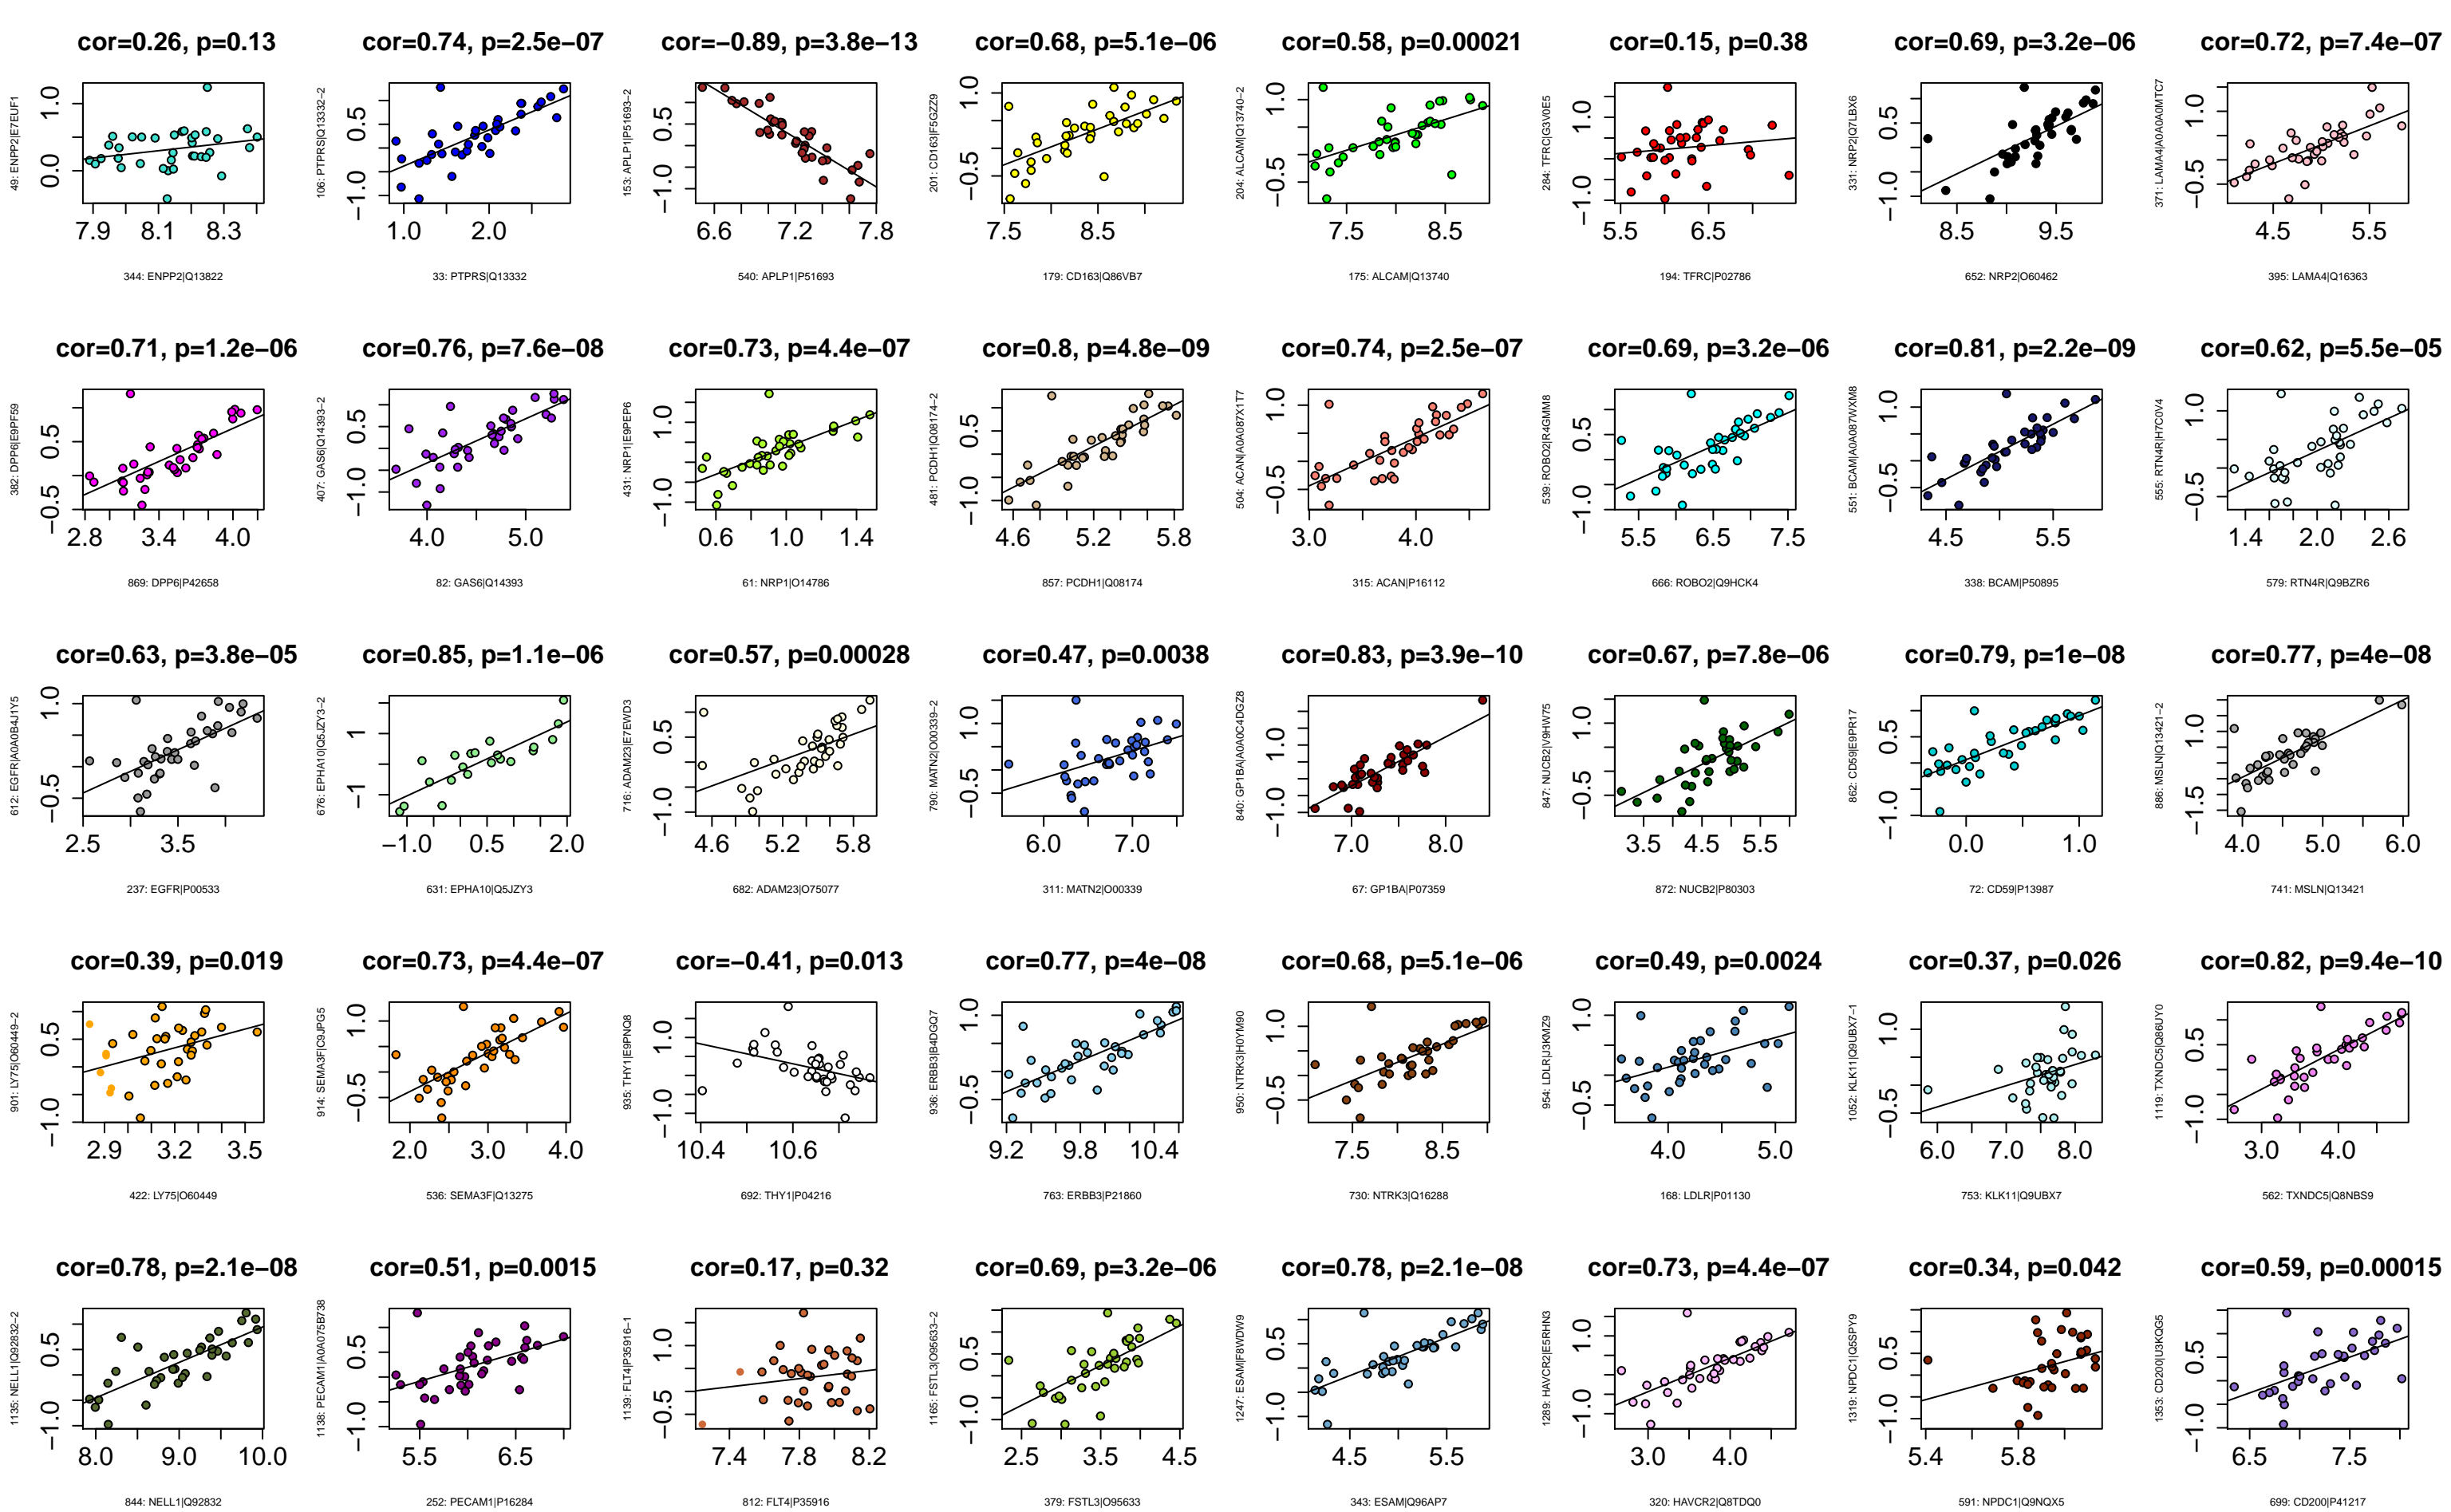

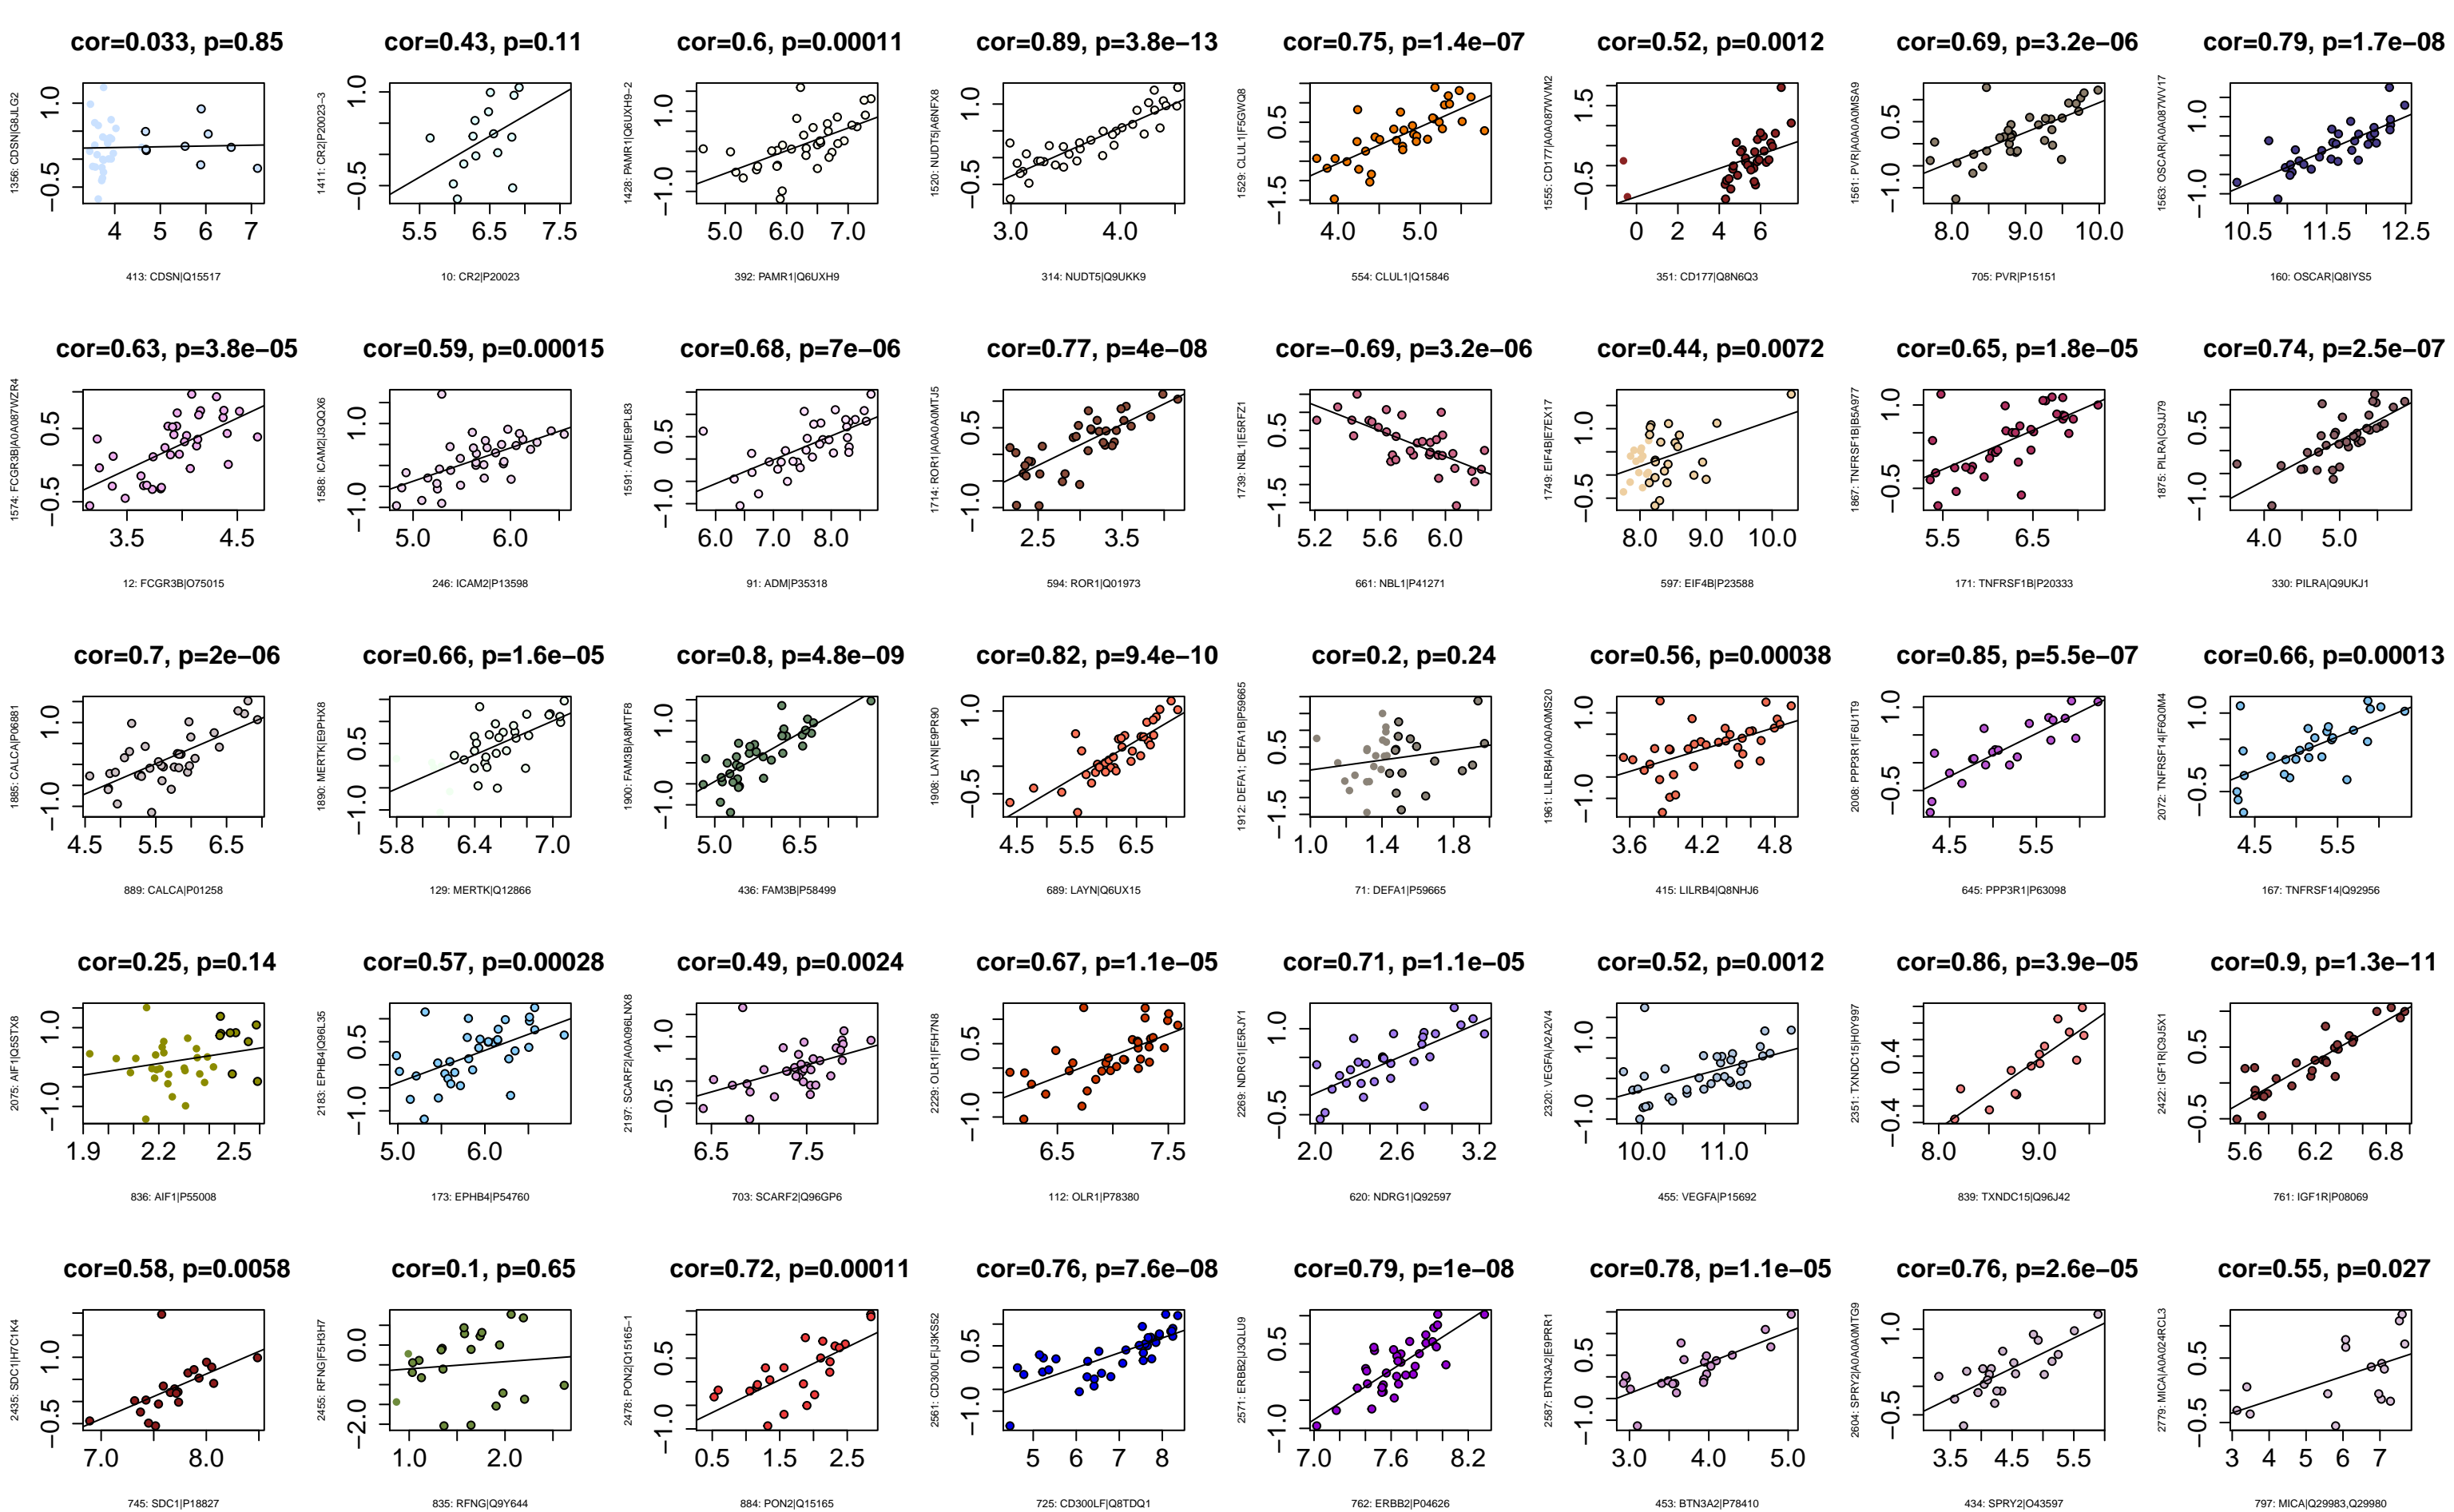

**cor=0.72, p=0.00016**

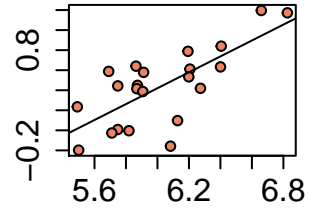

650: CD63|P08962

**cor=0.71, p=0.003**

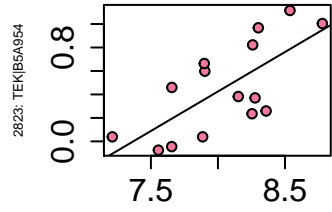

106: TEK|Q02763

**cor=0.73, p=4.4e-07**

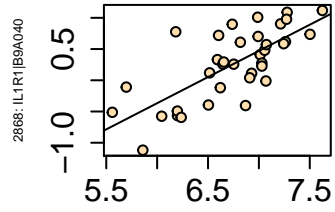

214: IL1R1|P14778

**cor=0.69, p=4.9e-05**

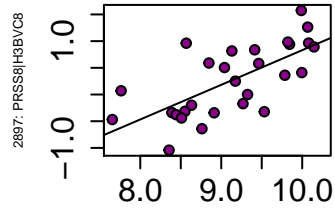

150: PRSS8|Q16651

**cor=0.89, p=8.8e-06**

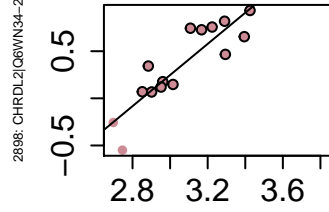

556: CHRDL2|Q6WN34

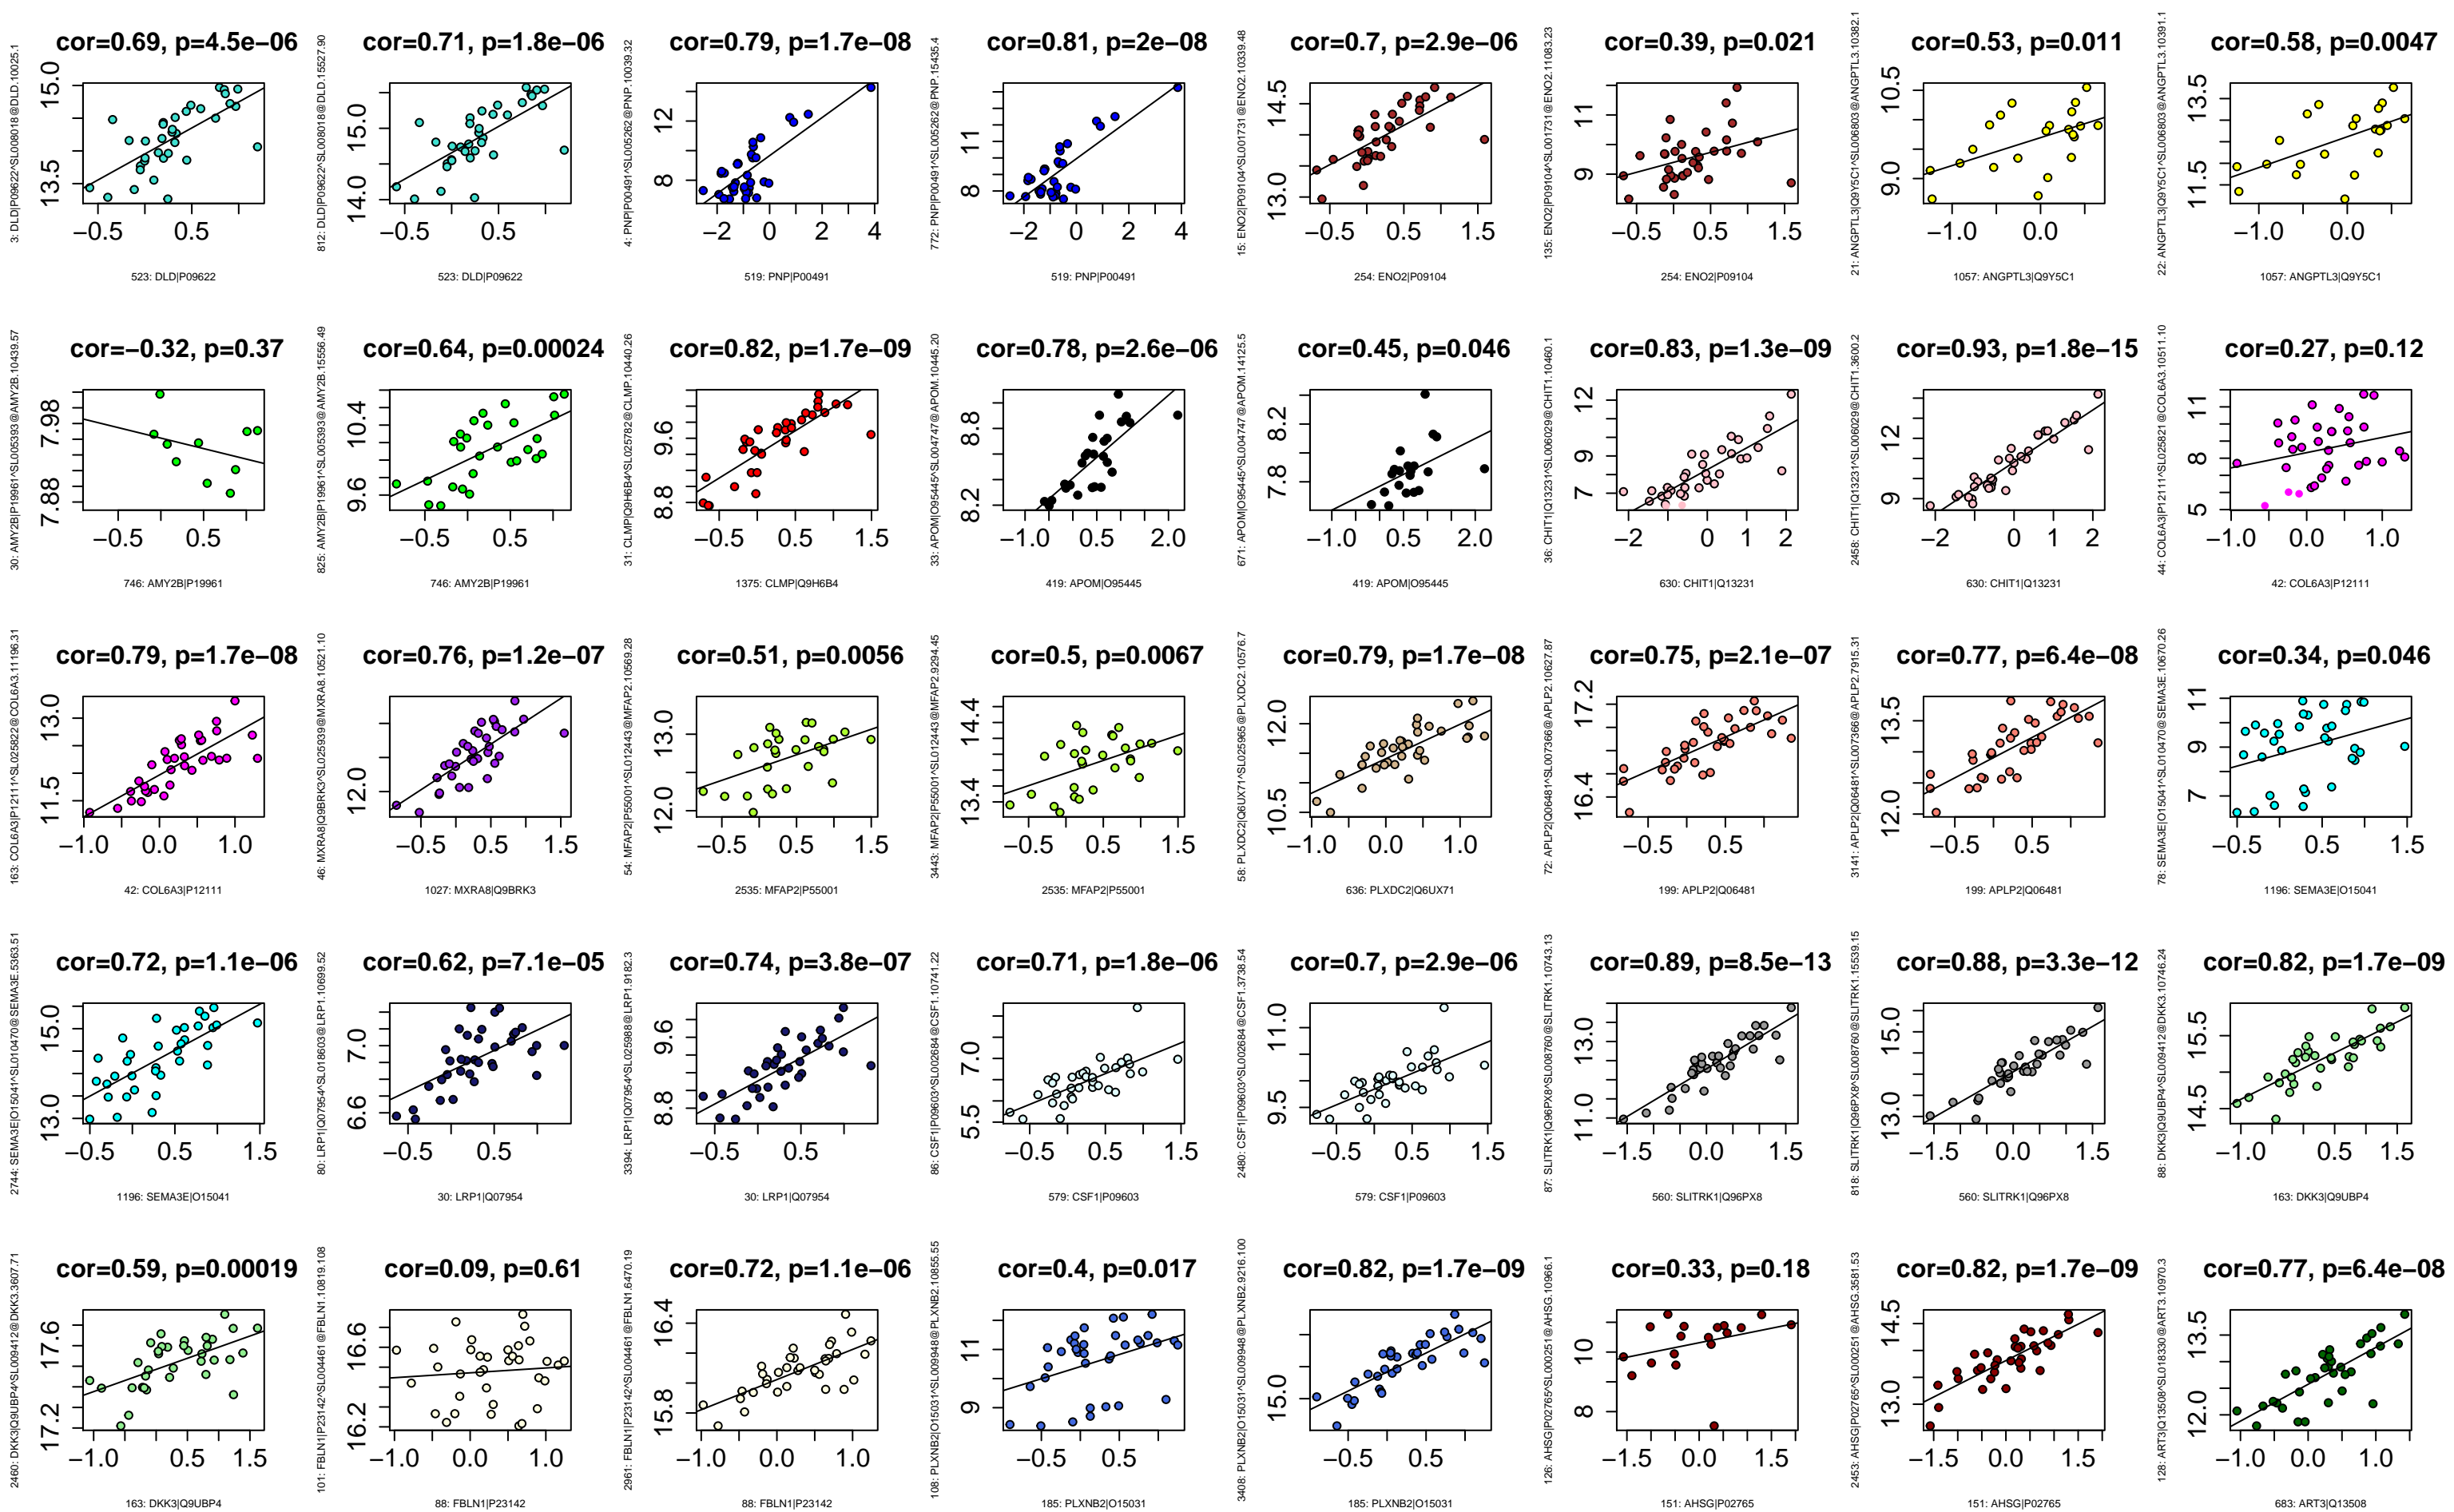



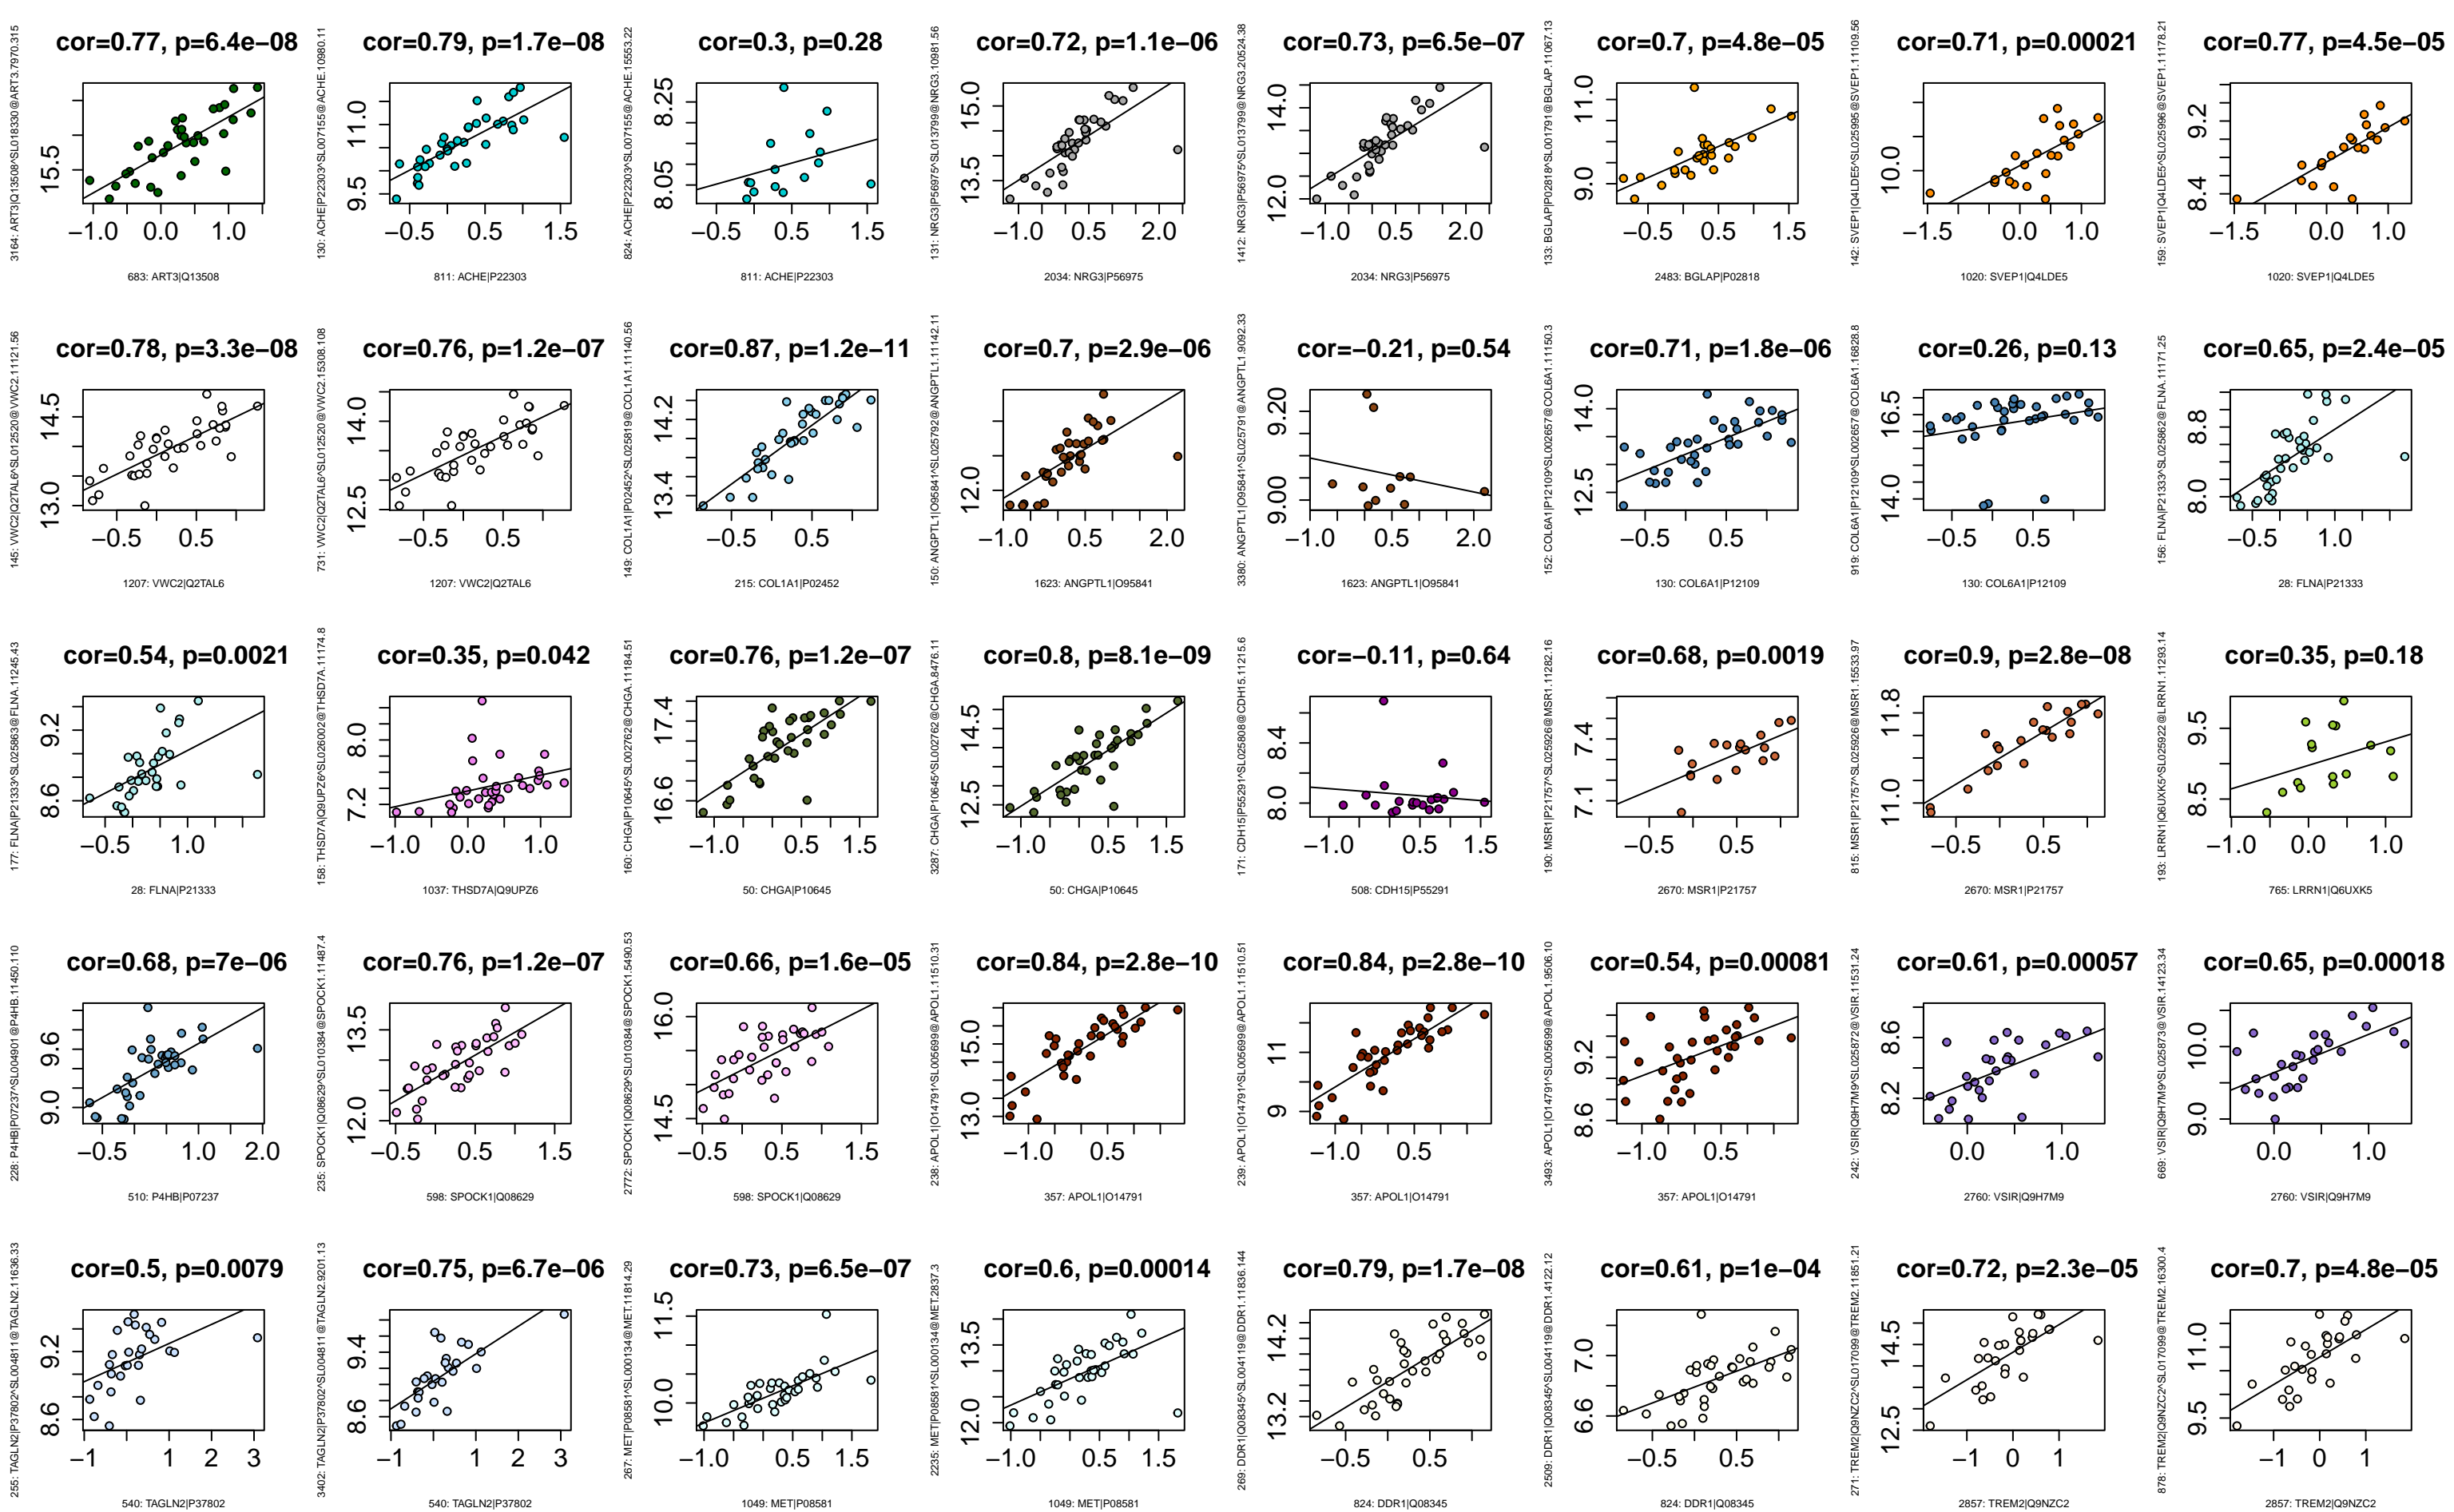

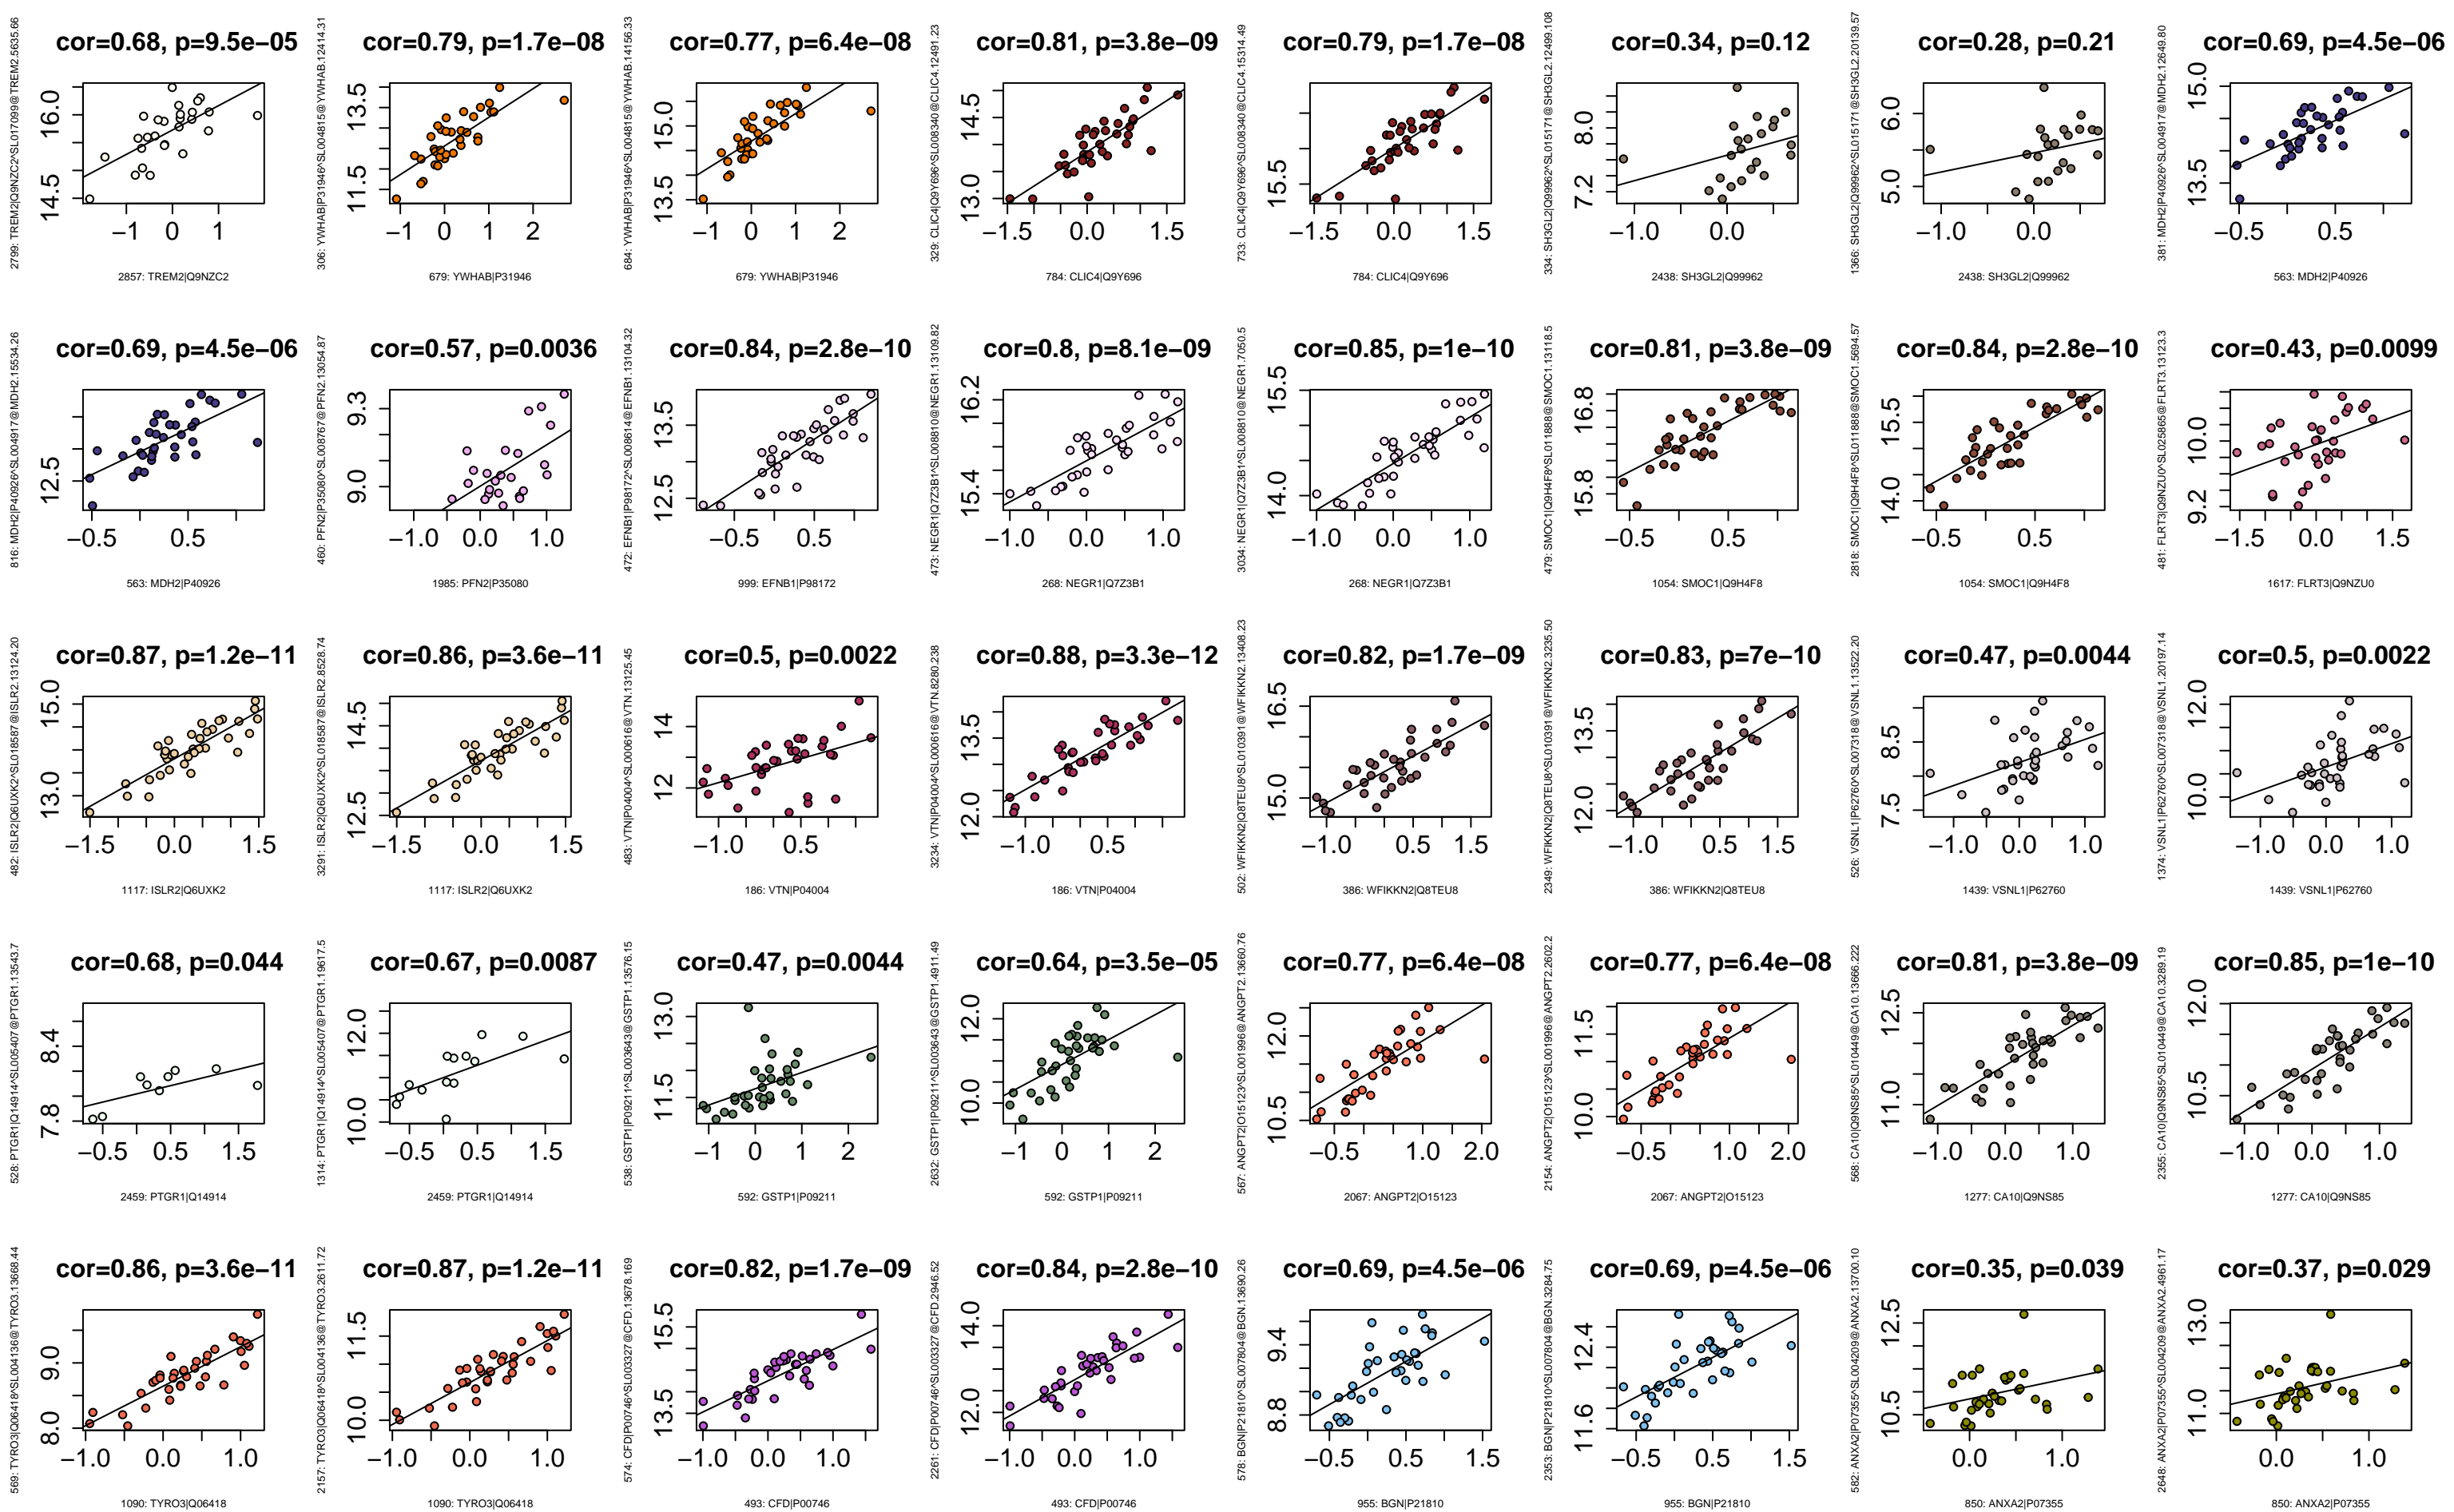

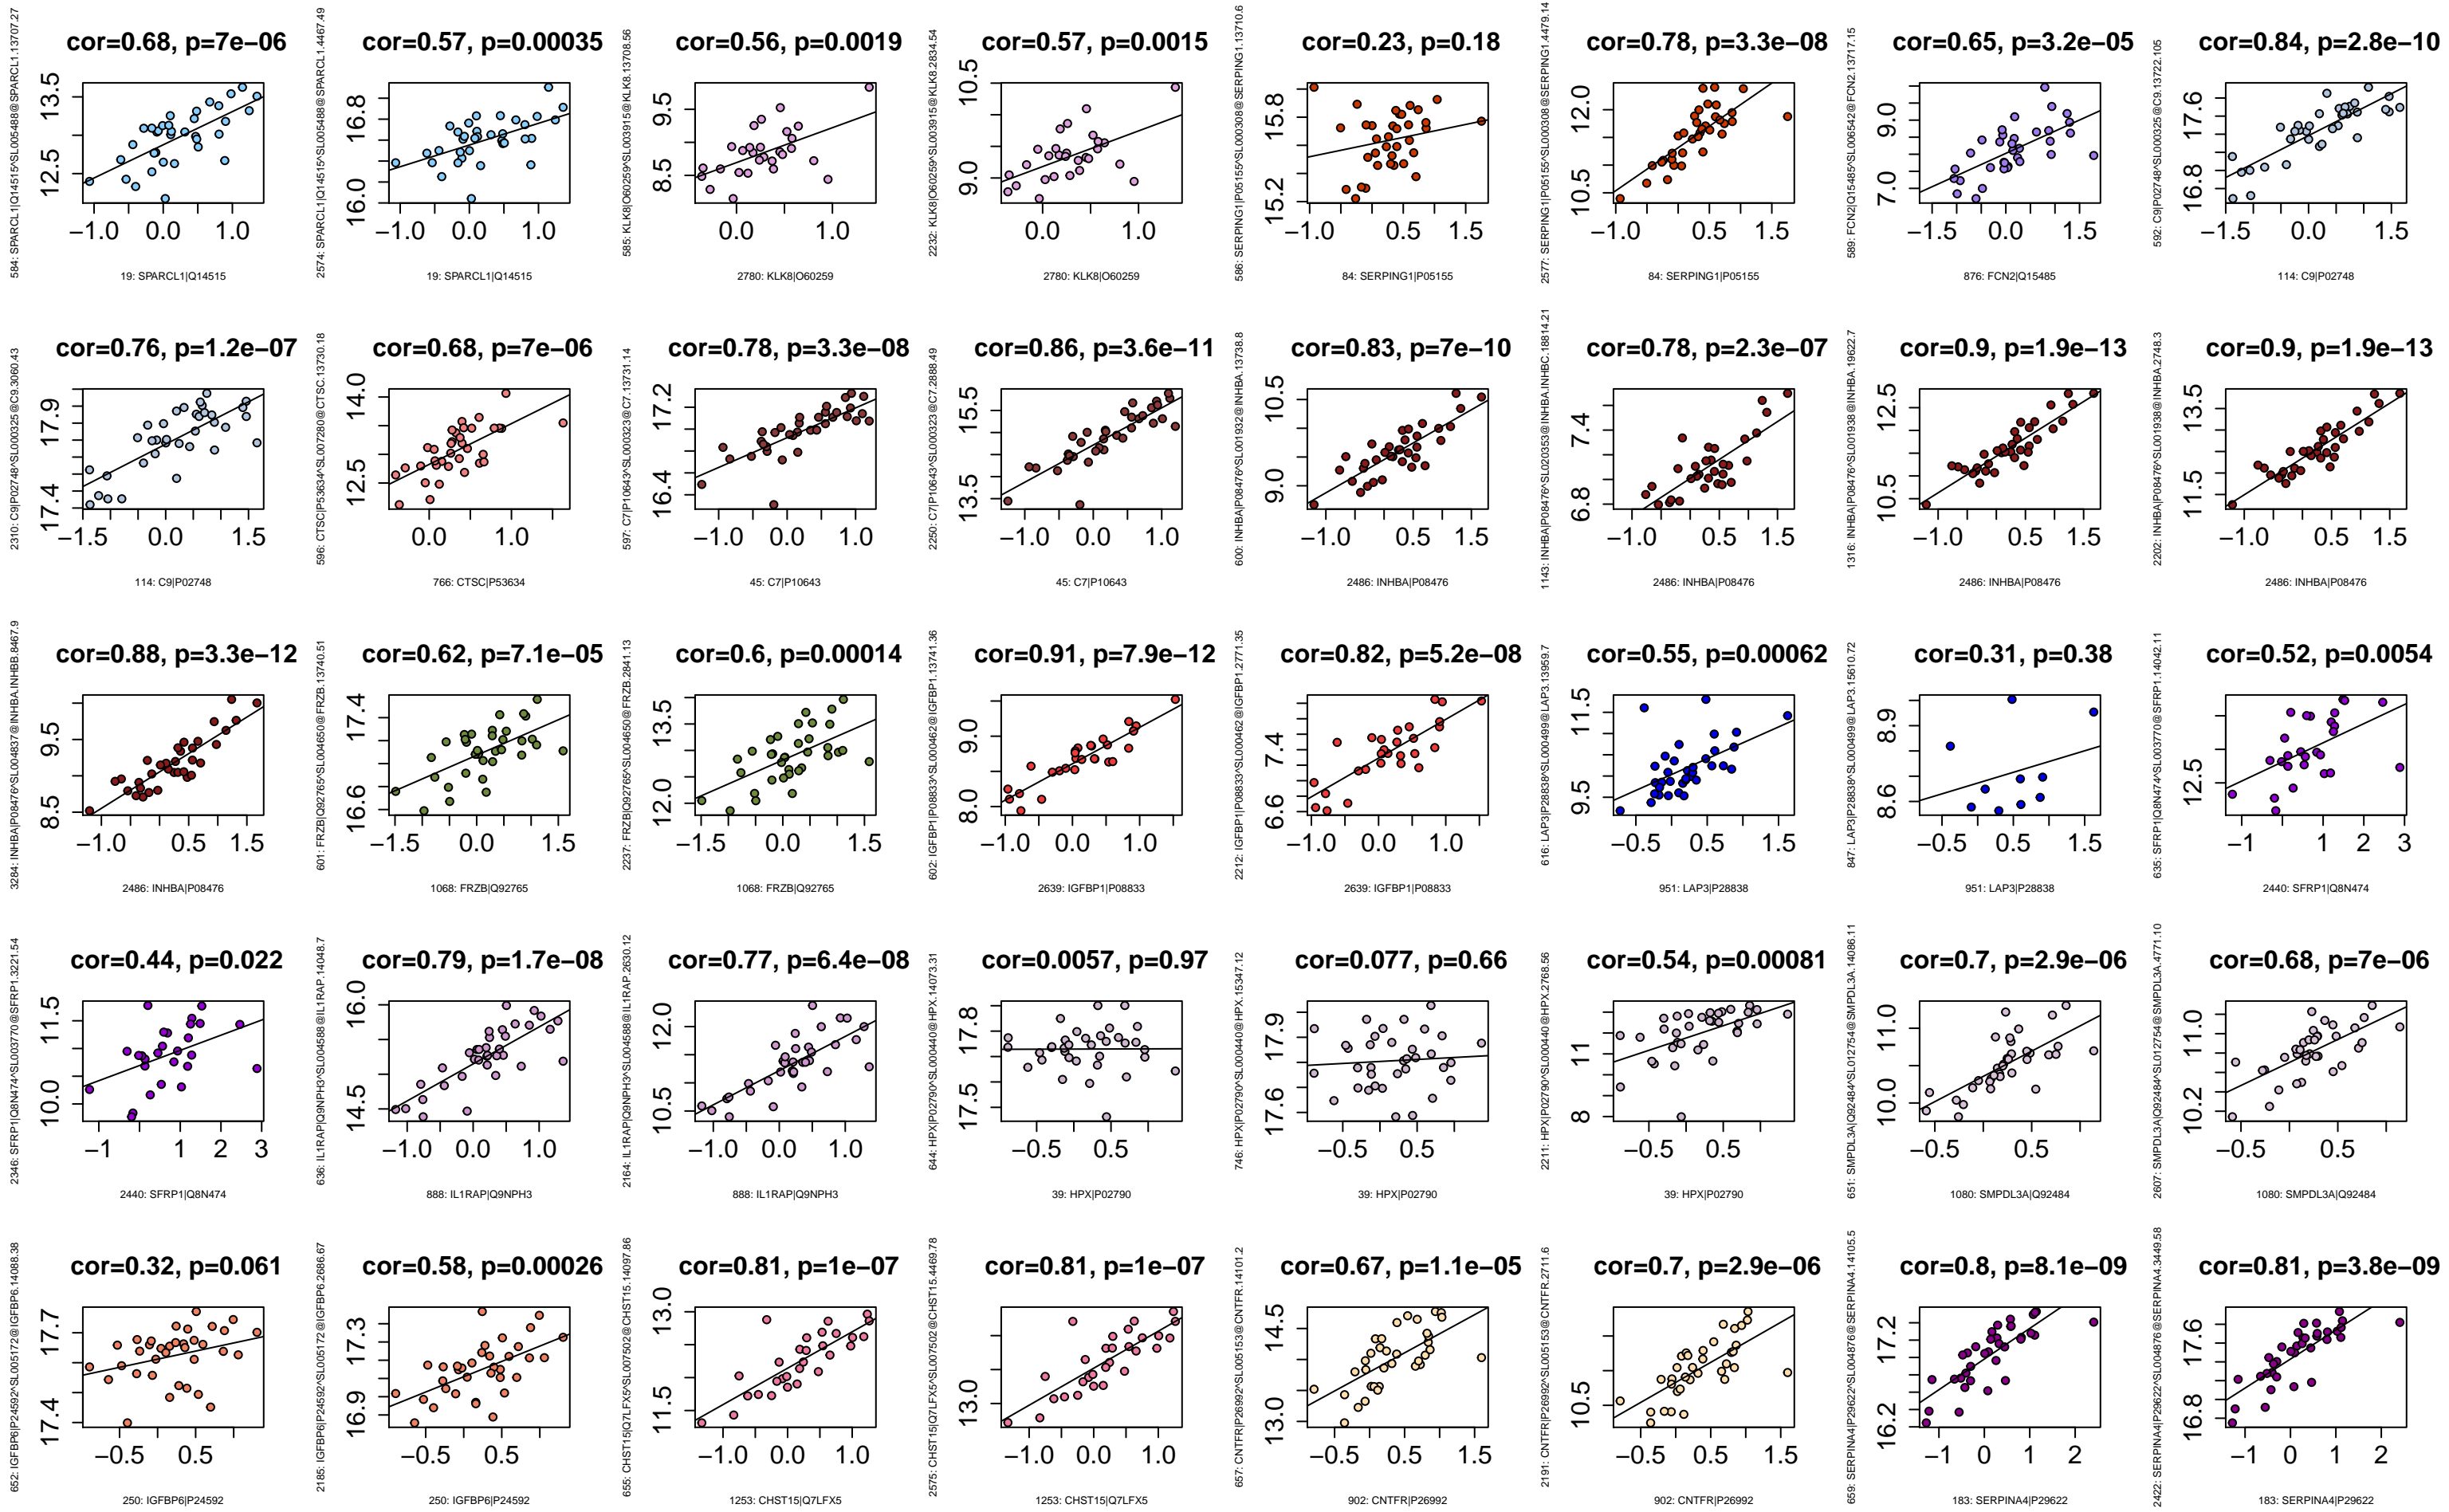

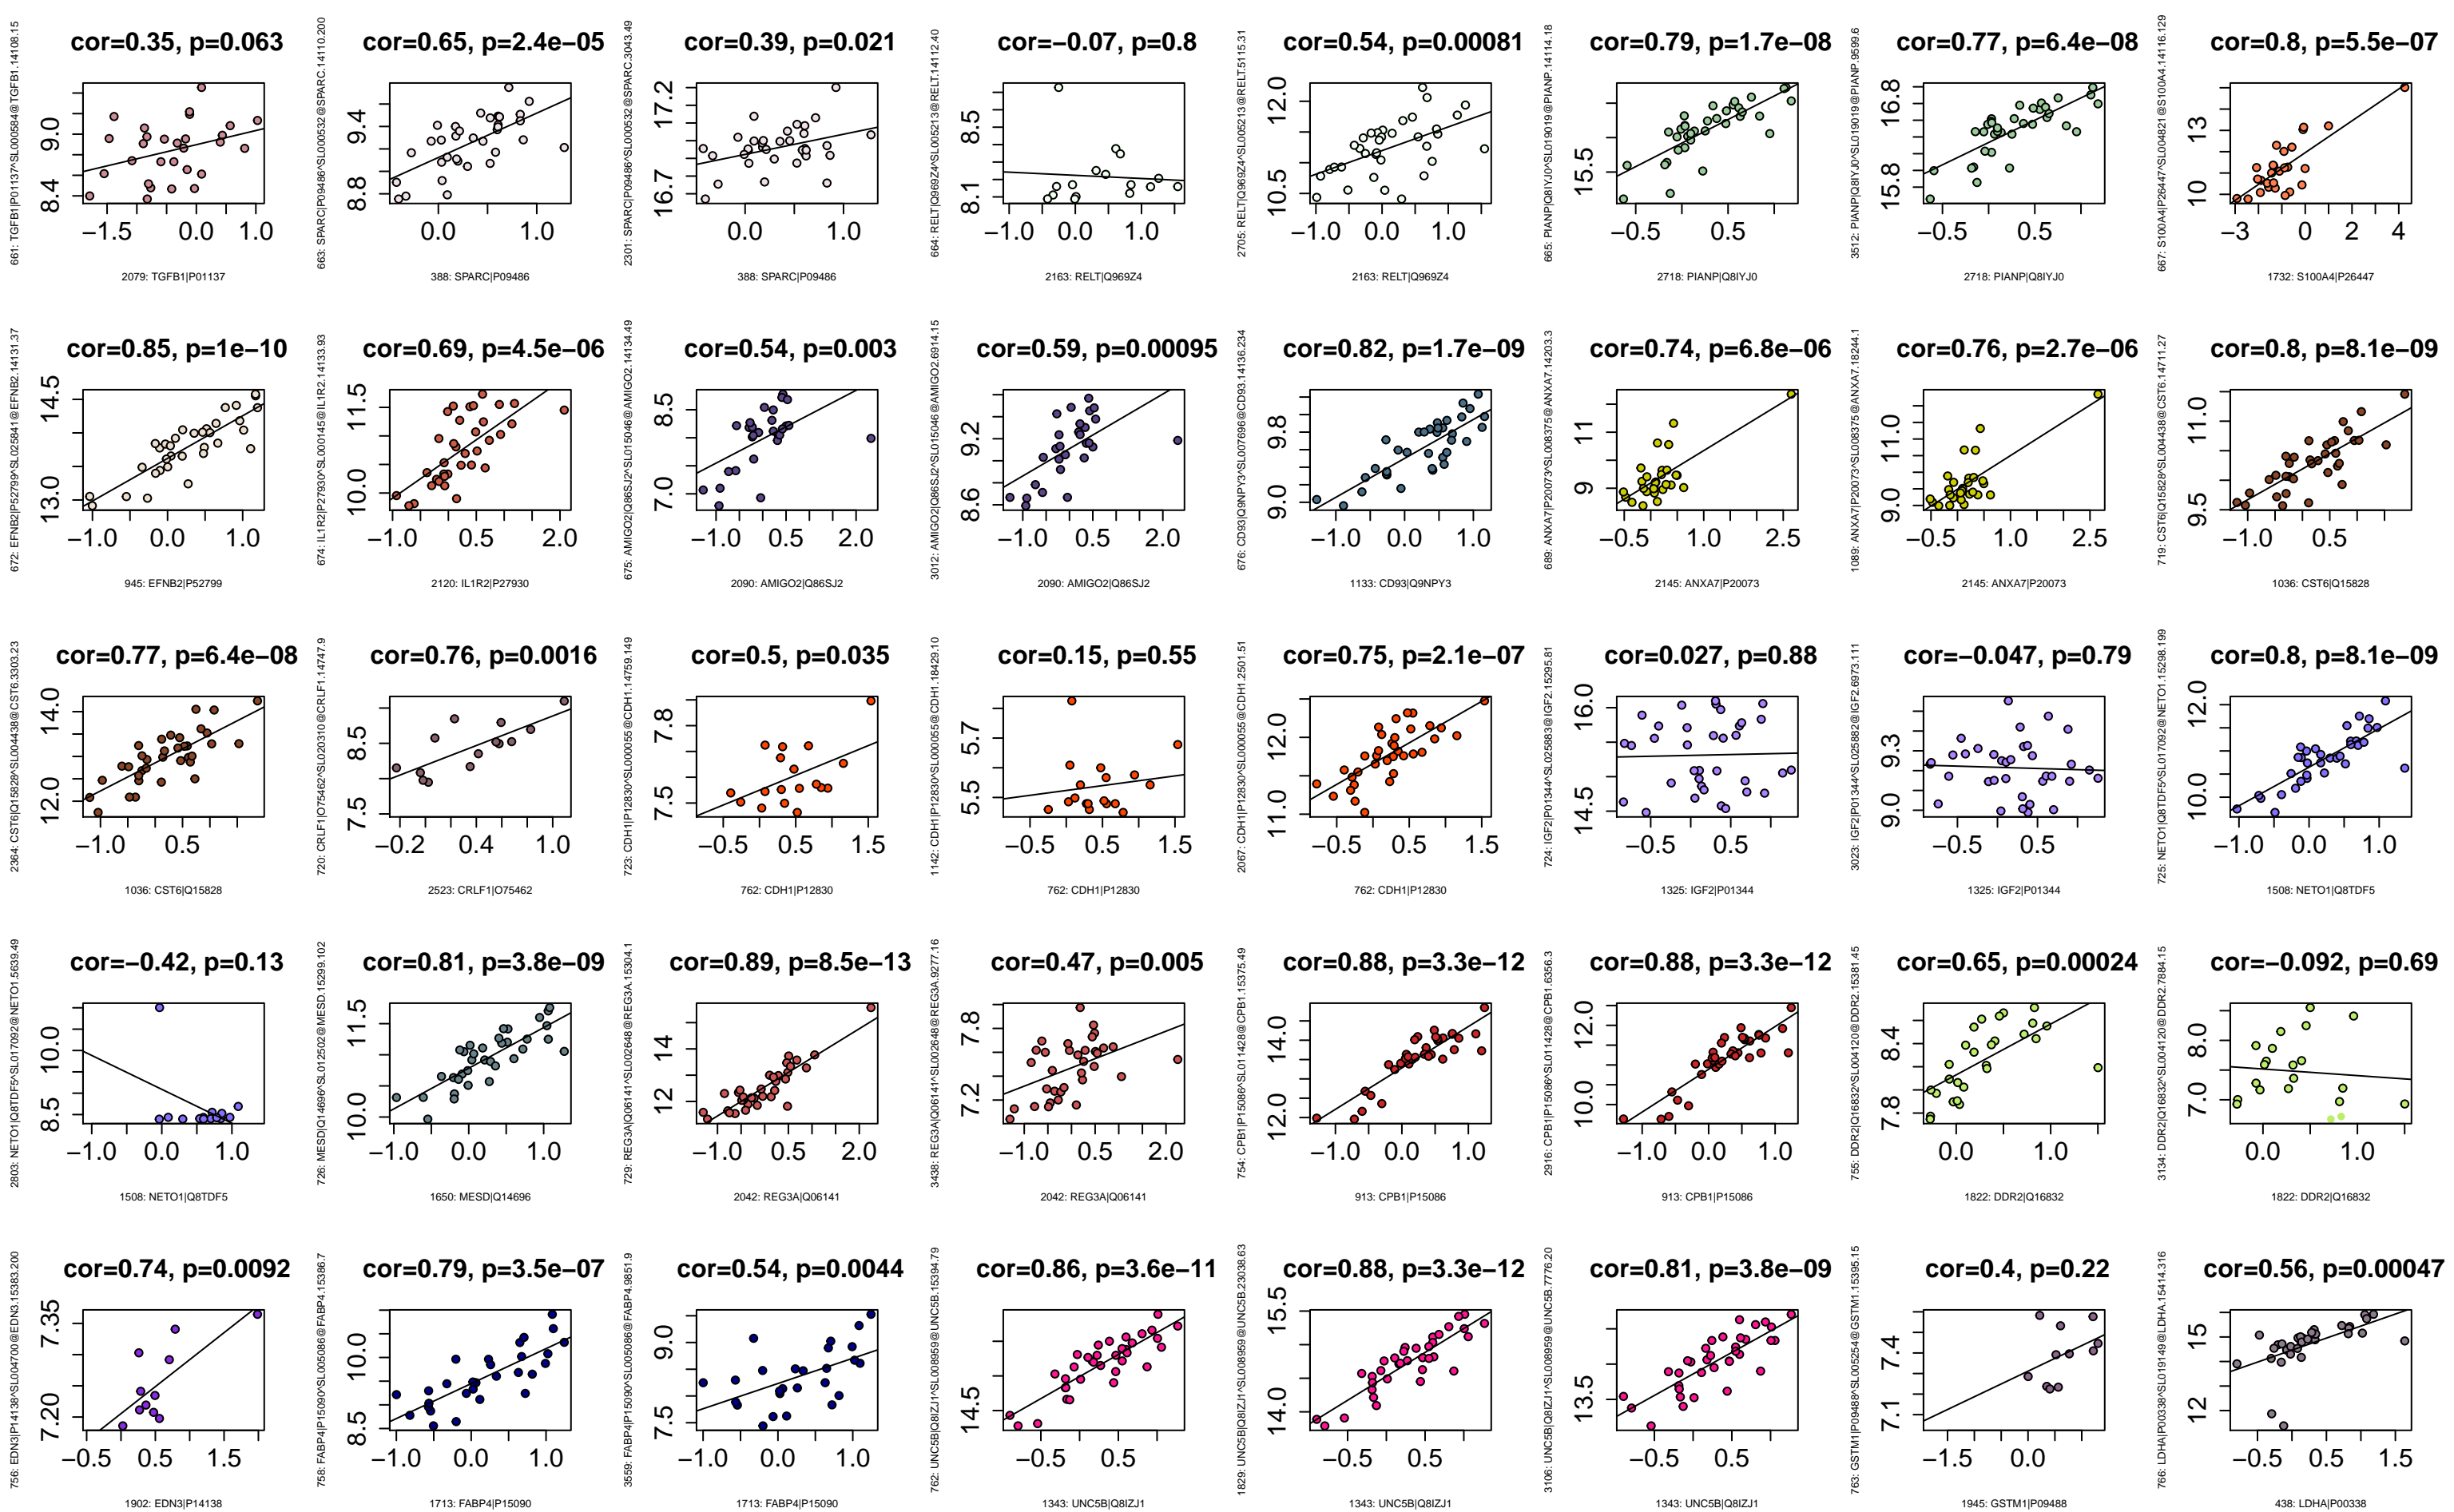

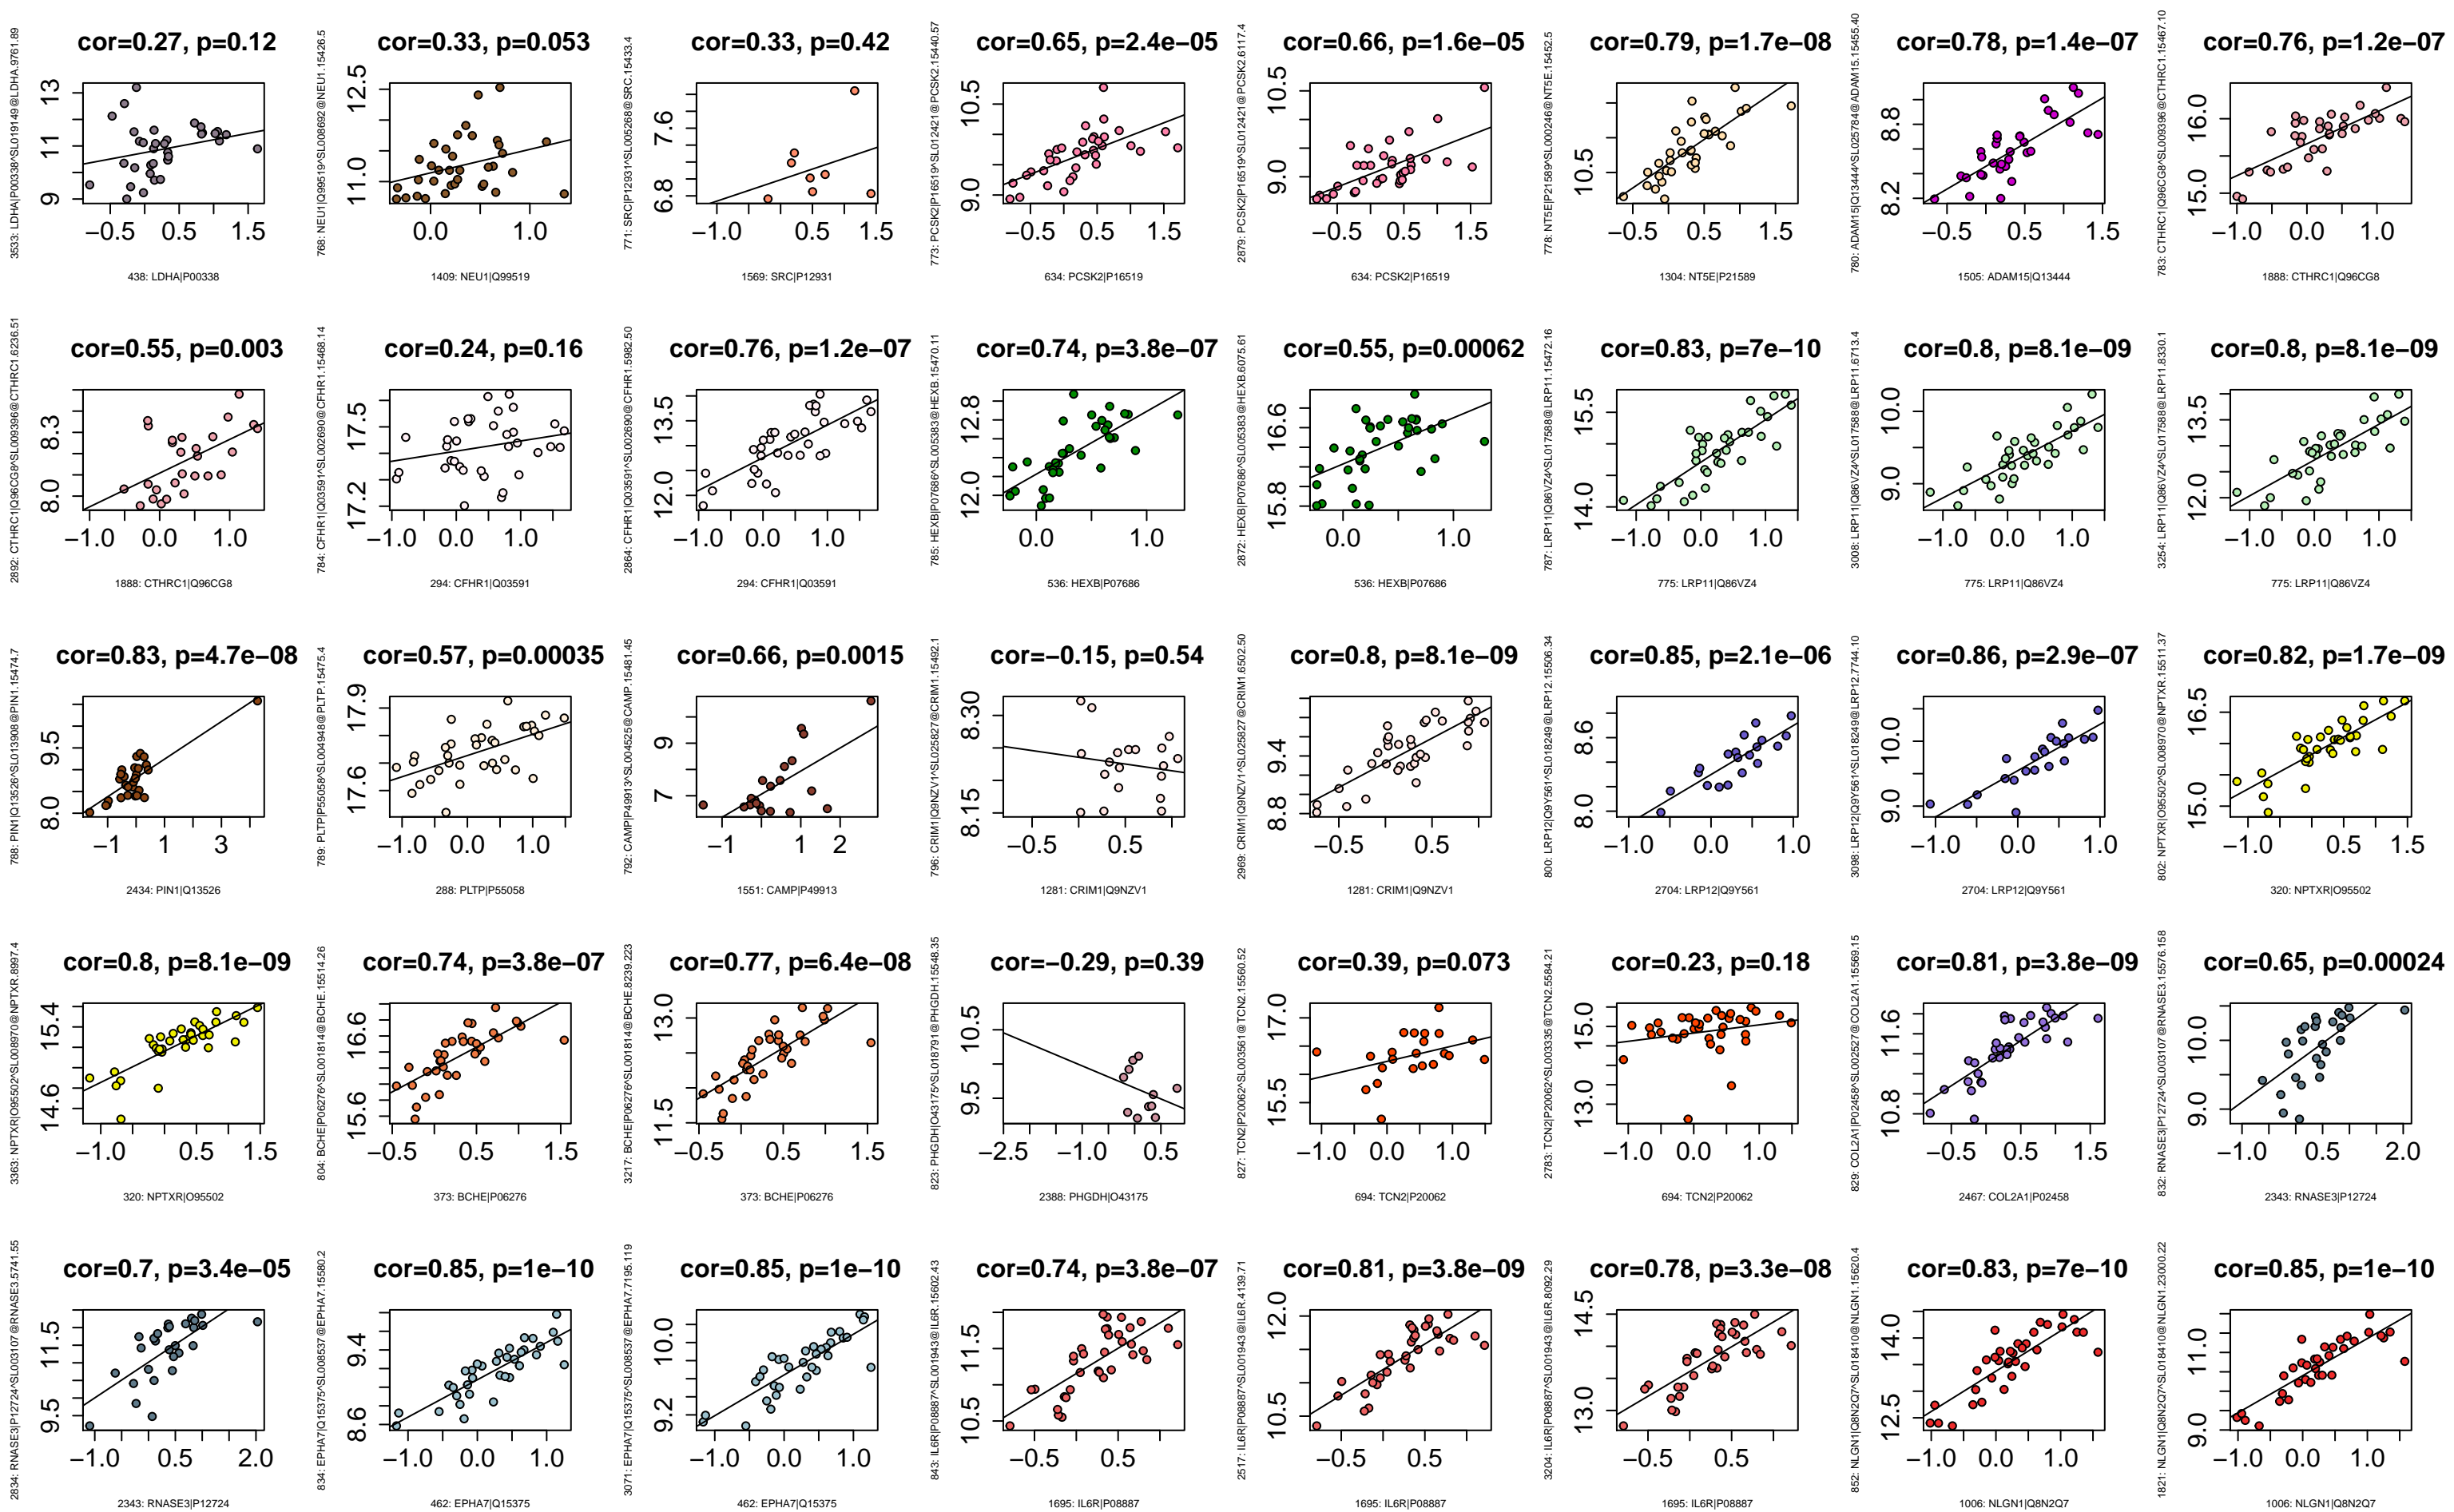

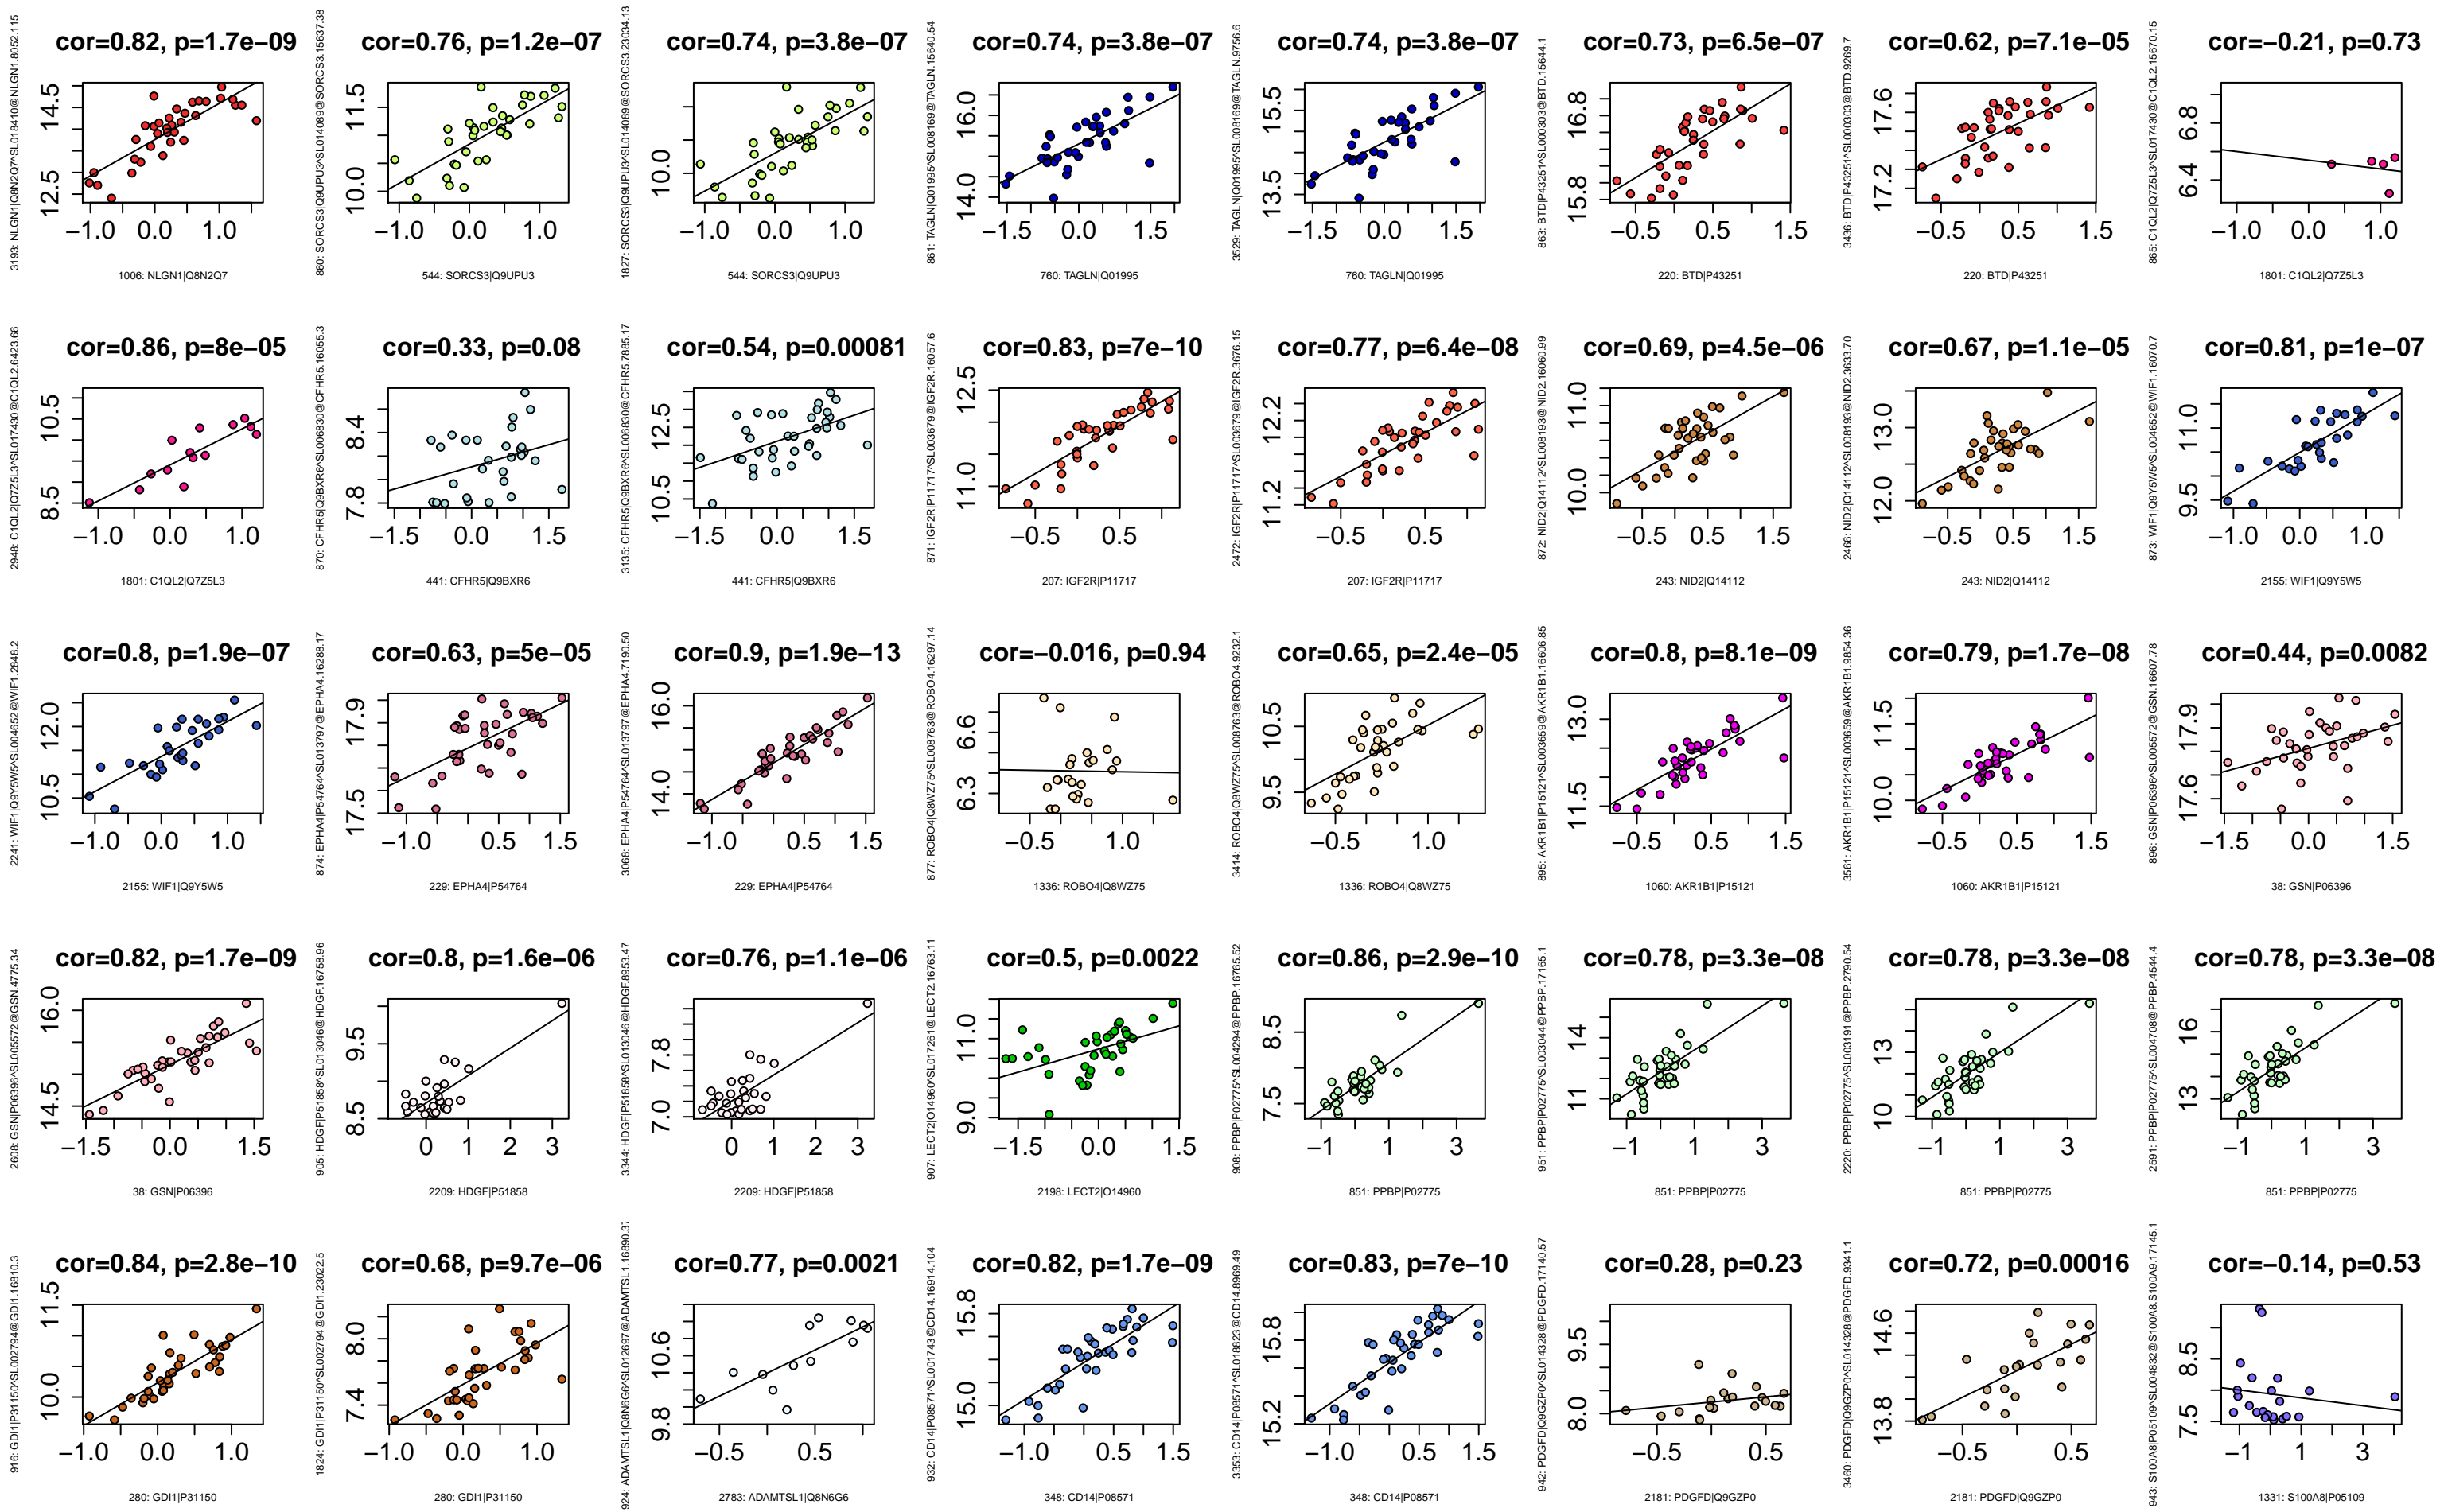

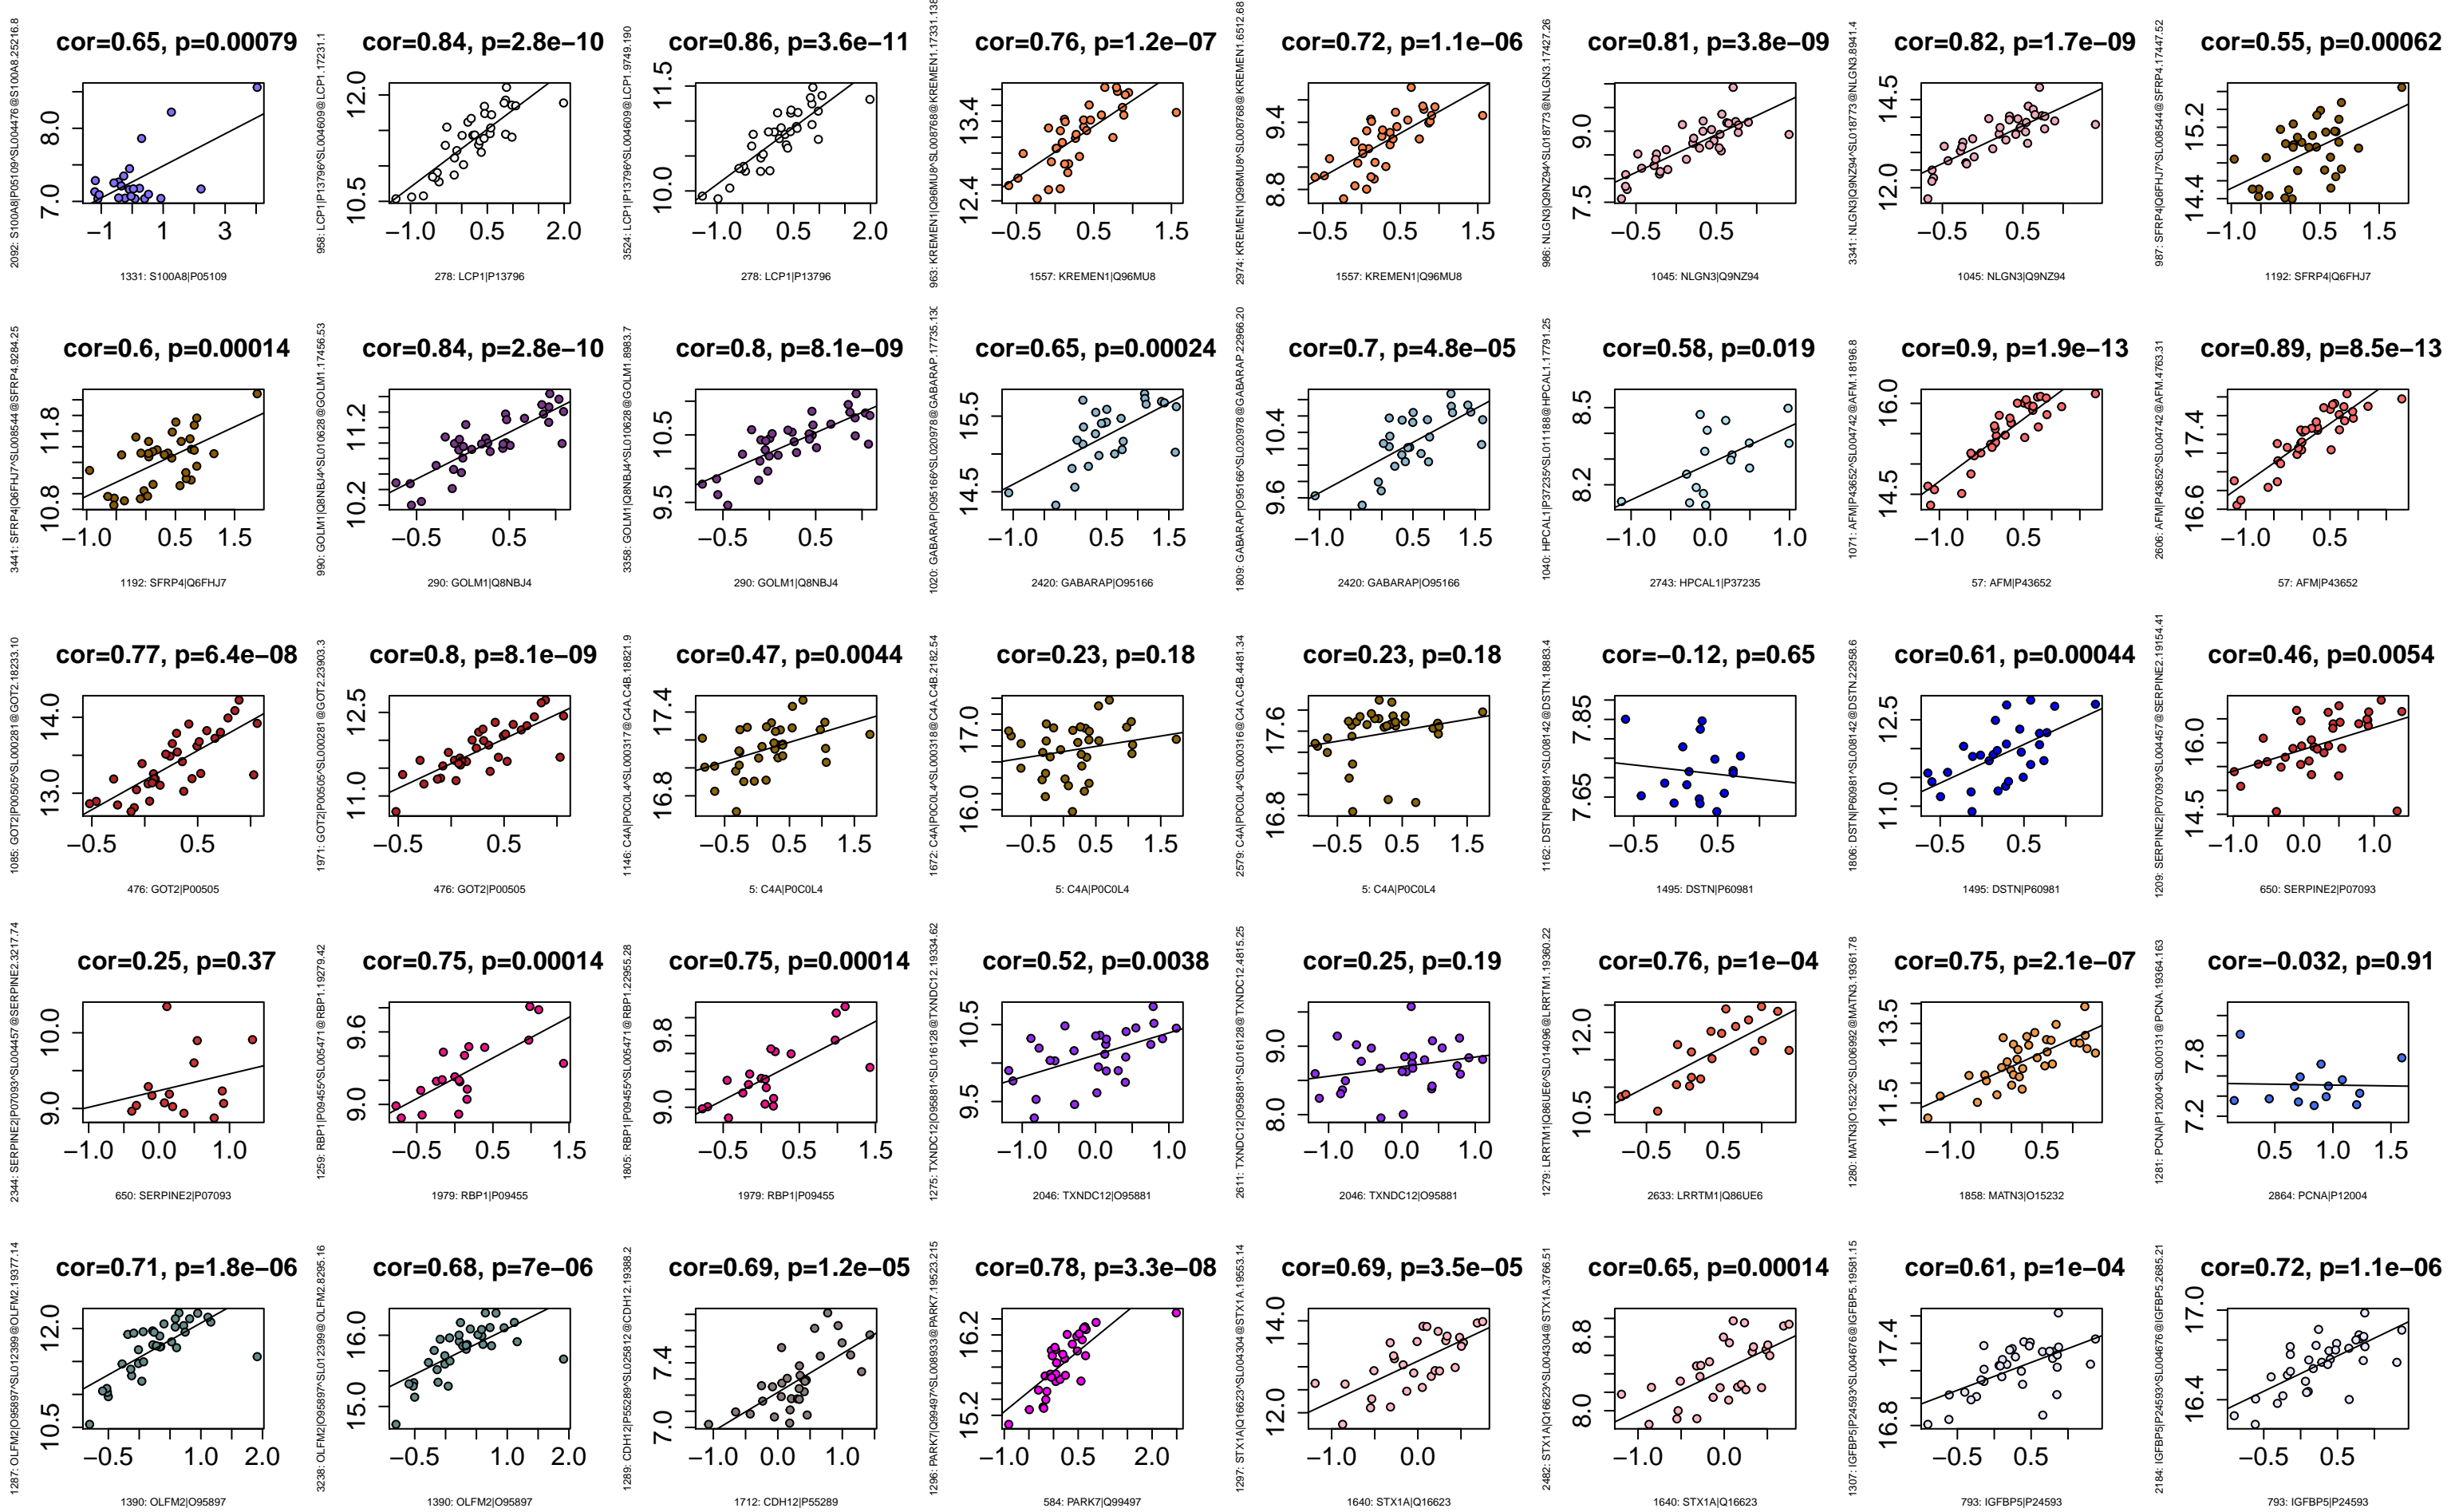

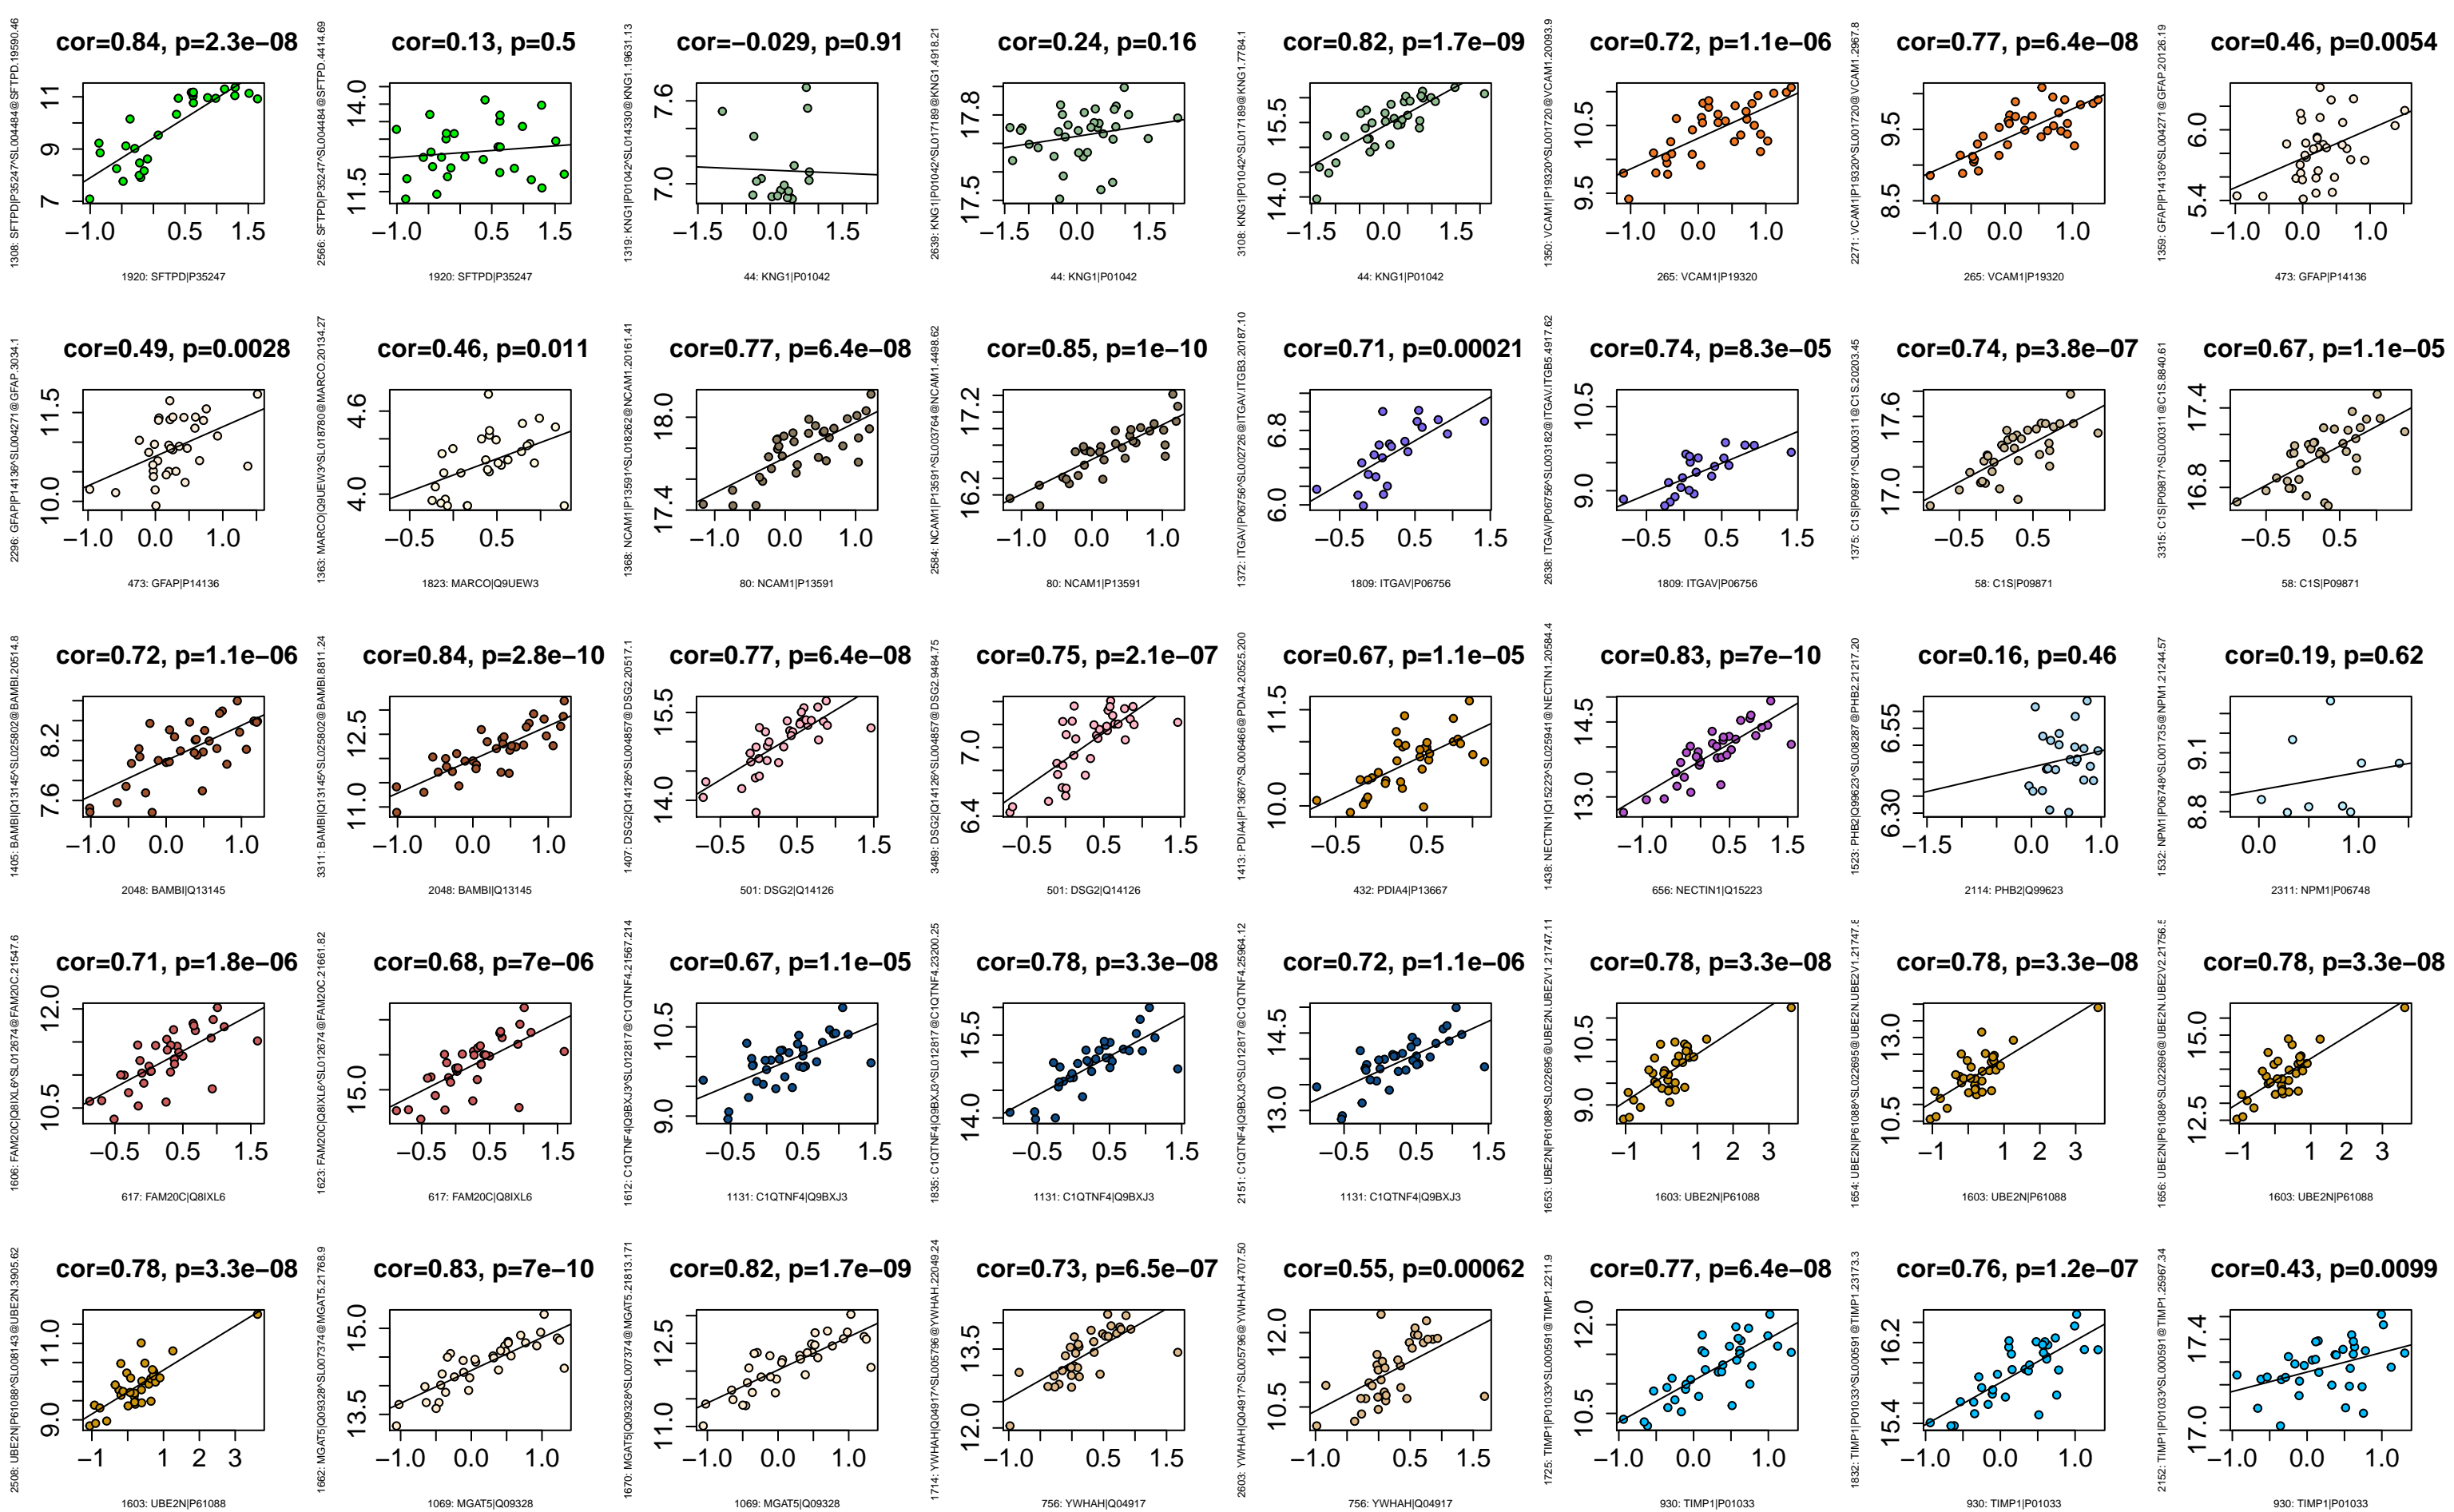



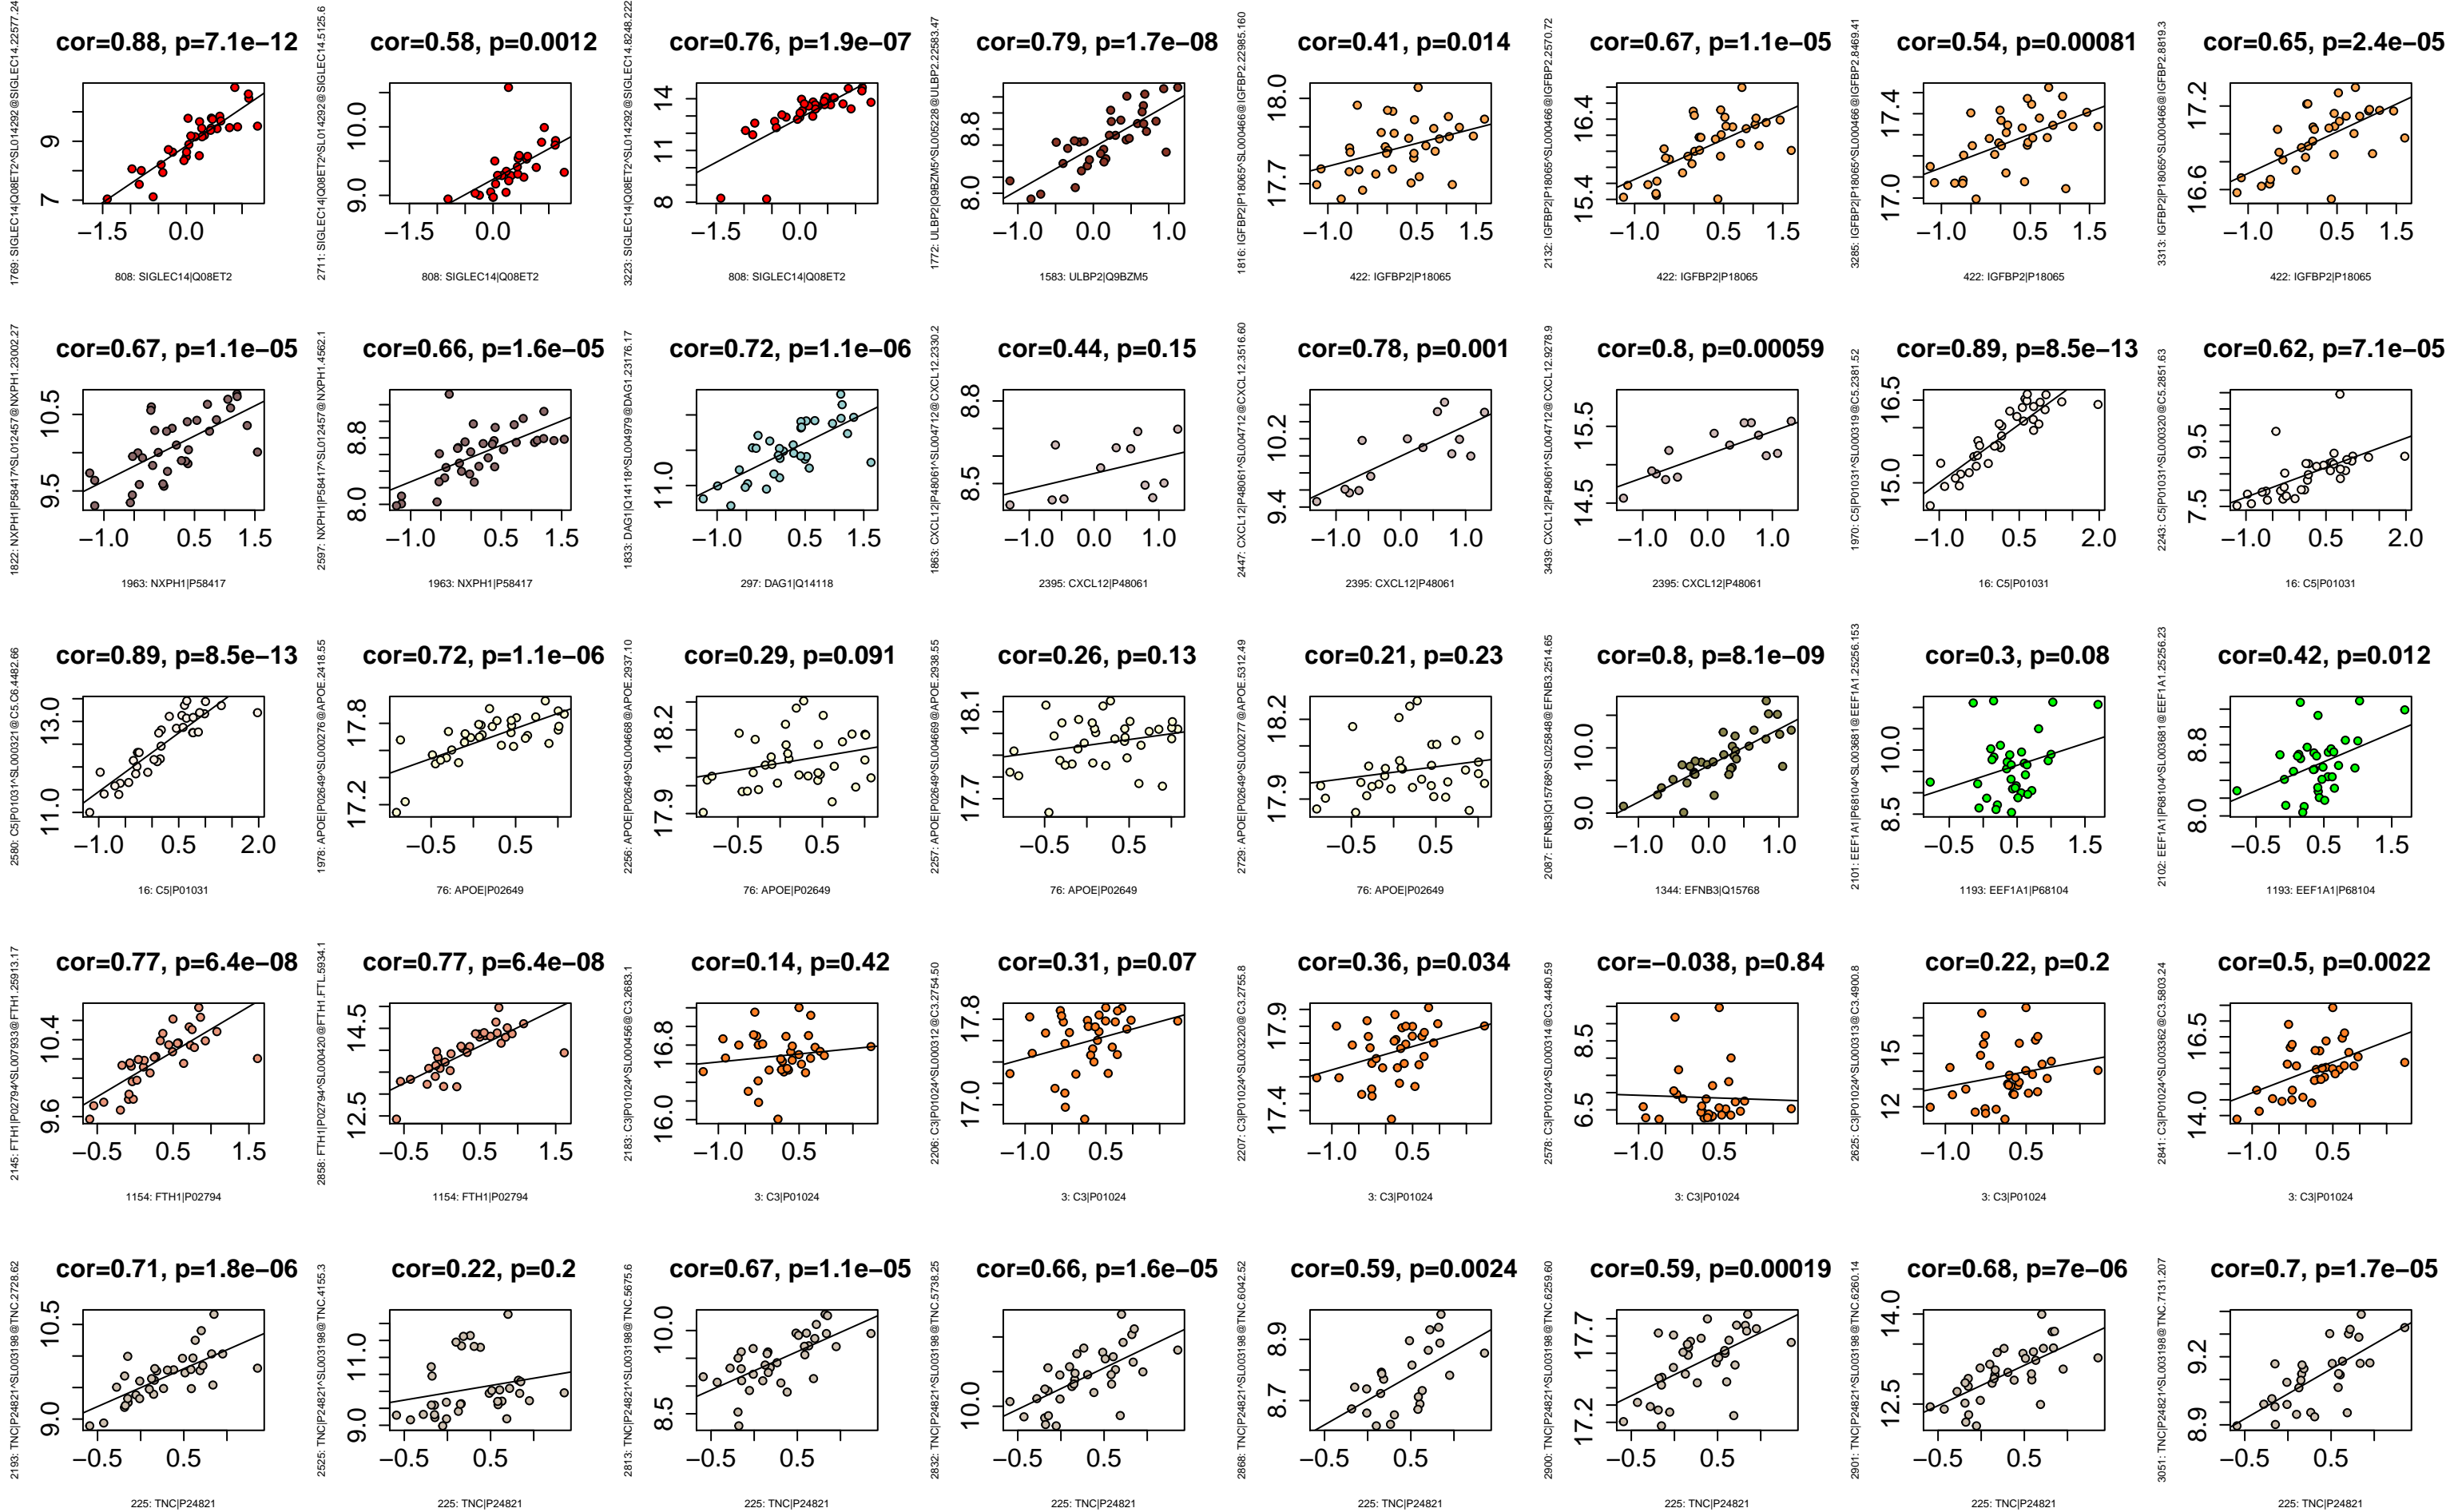

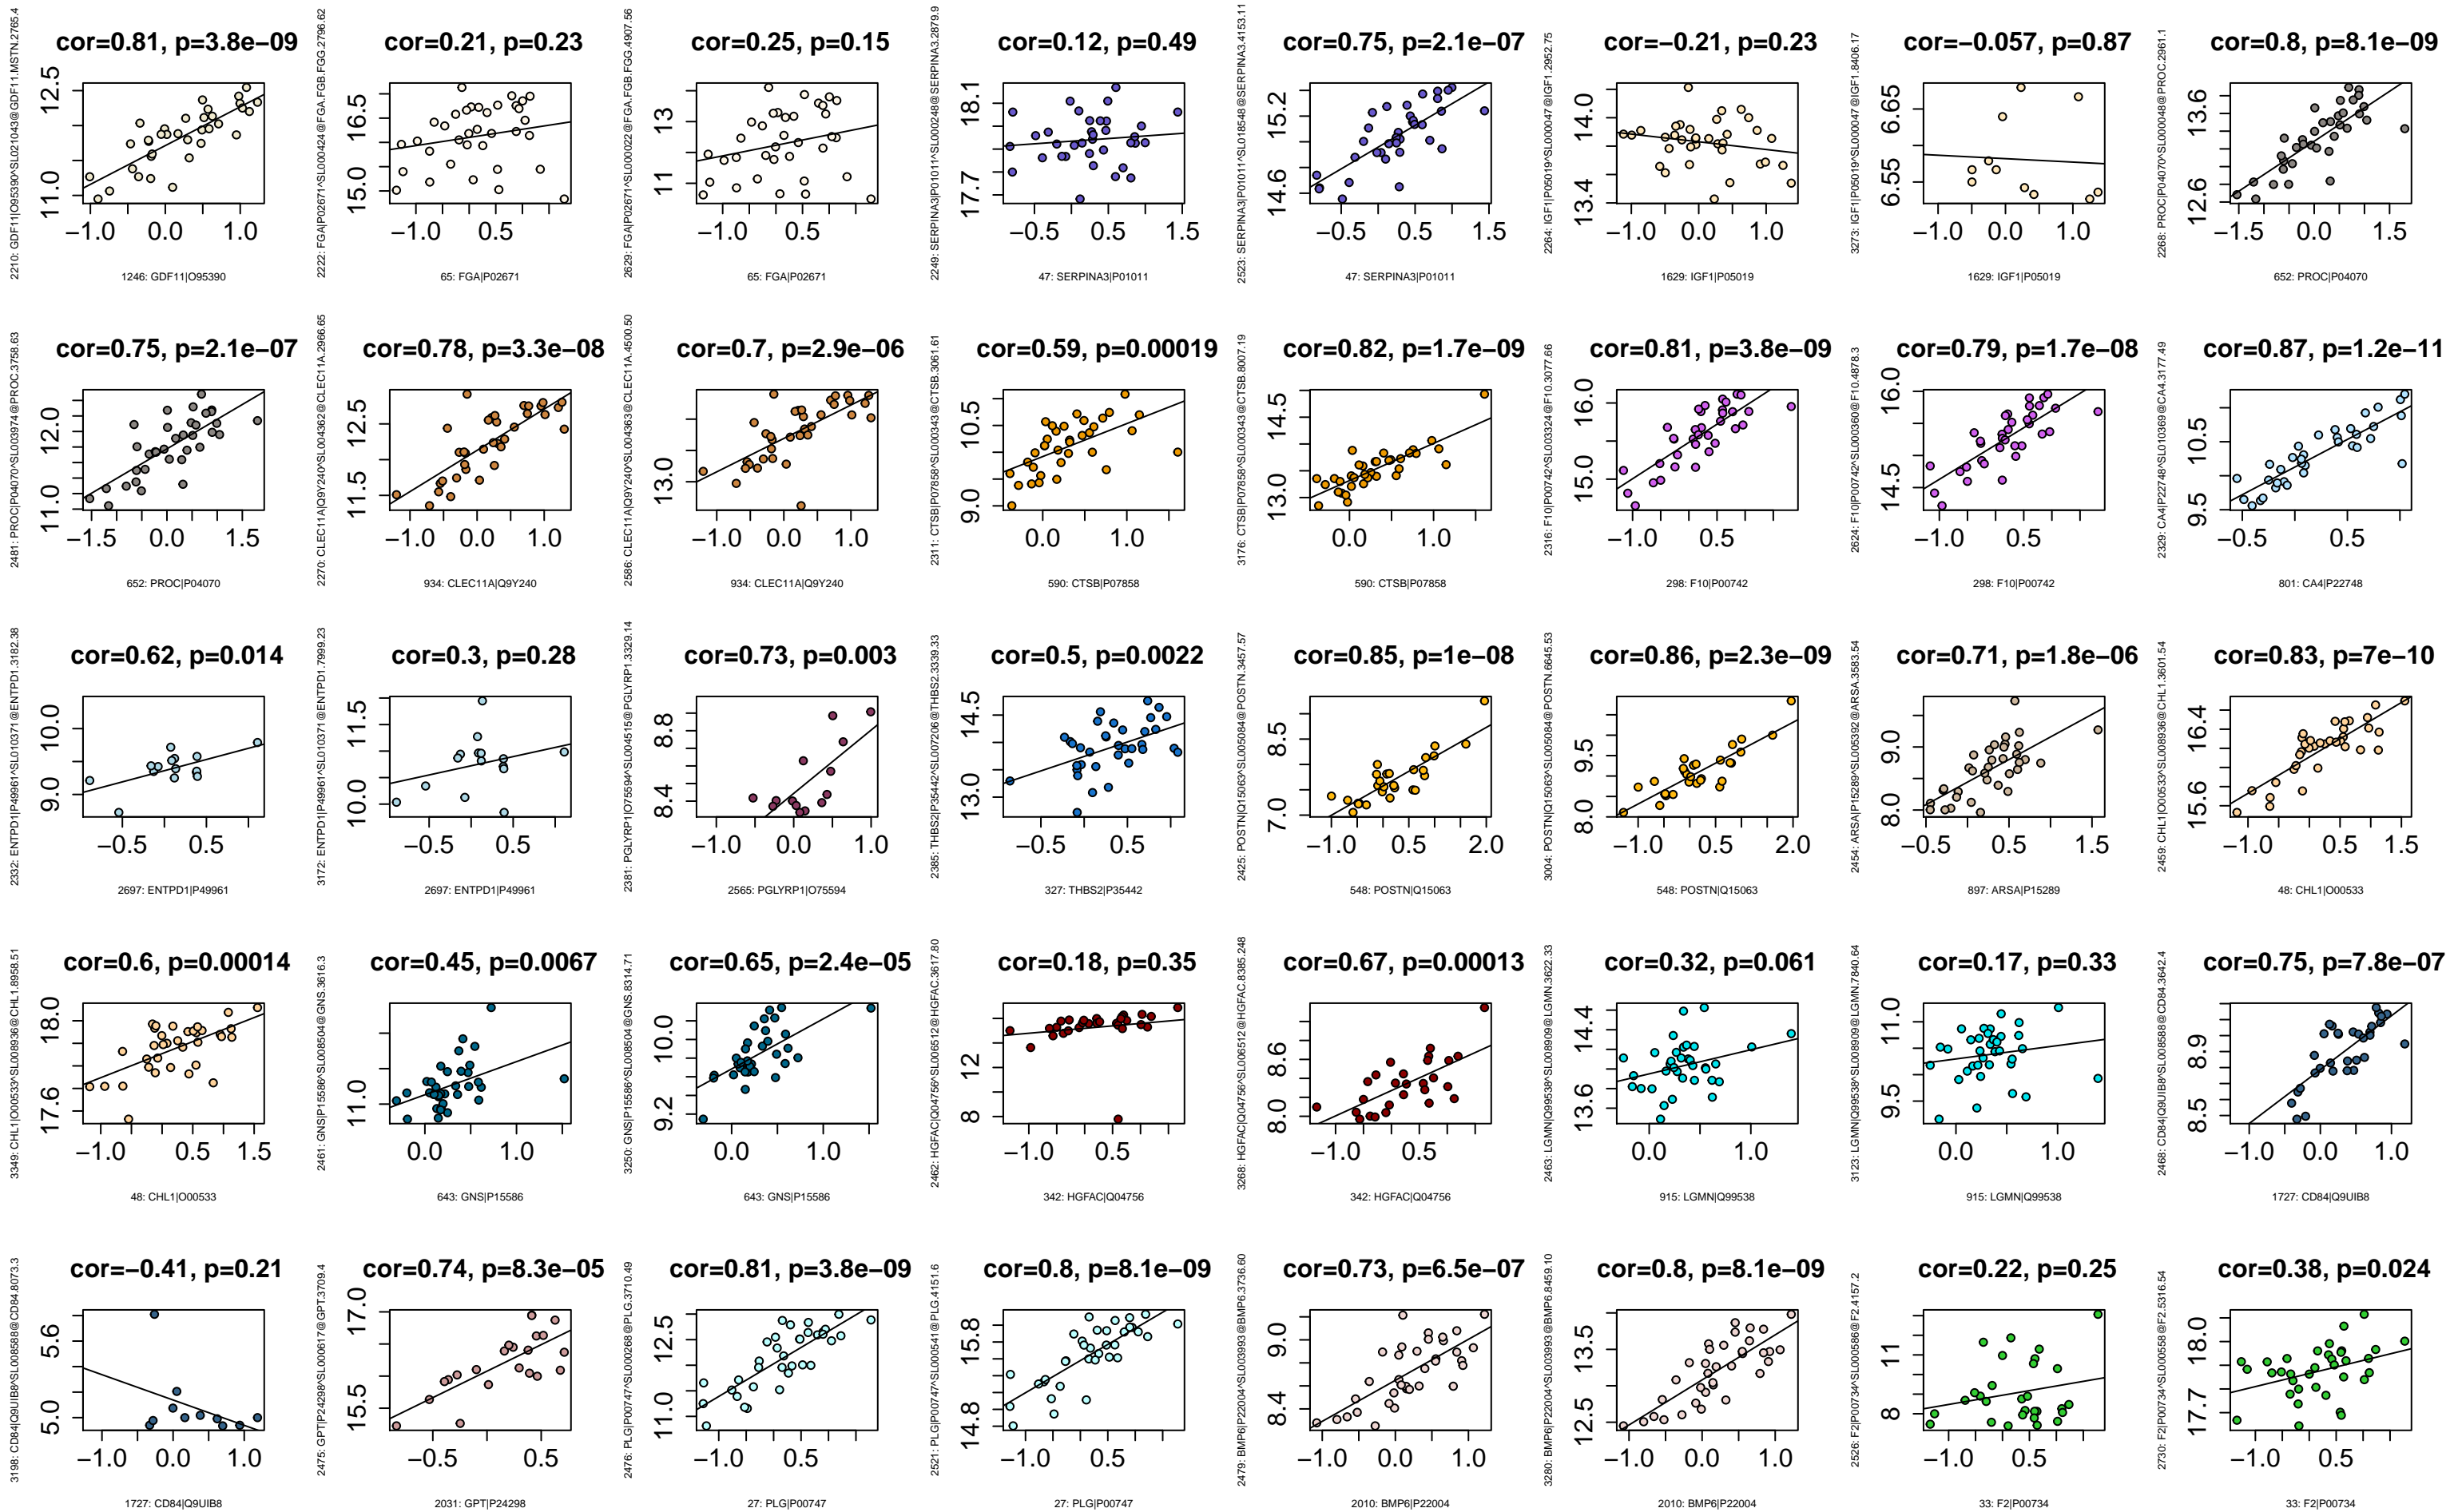

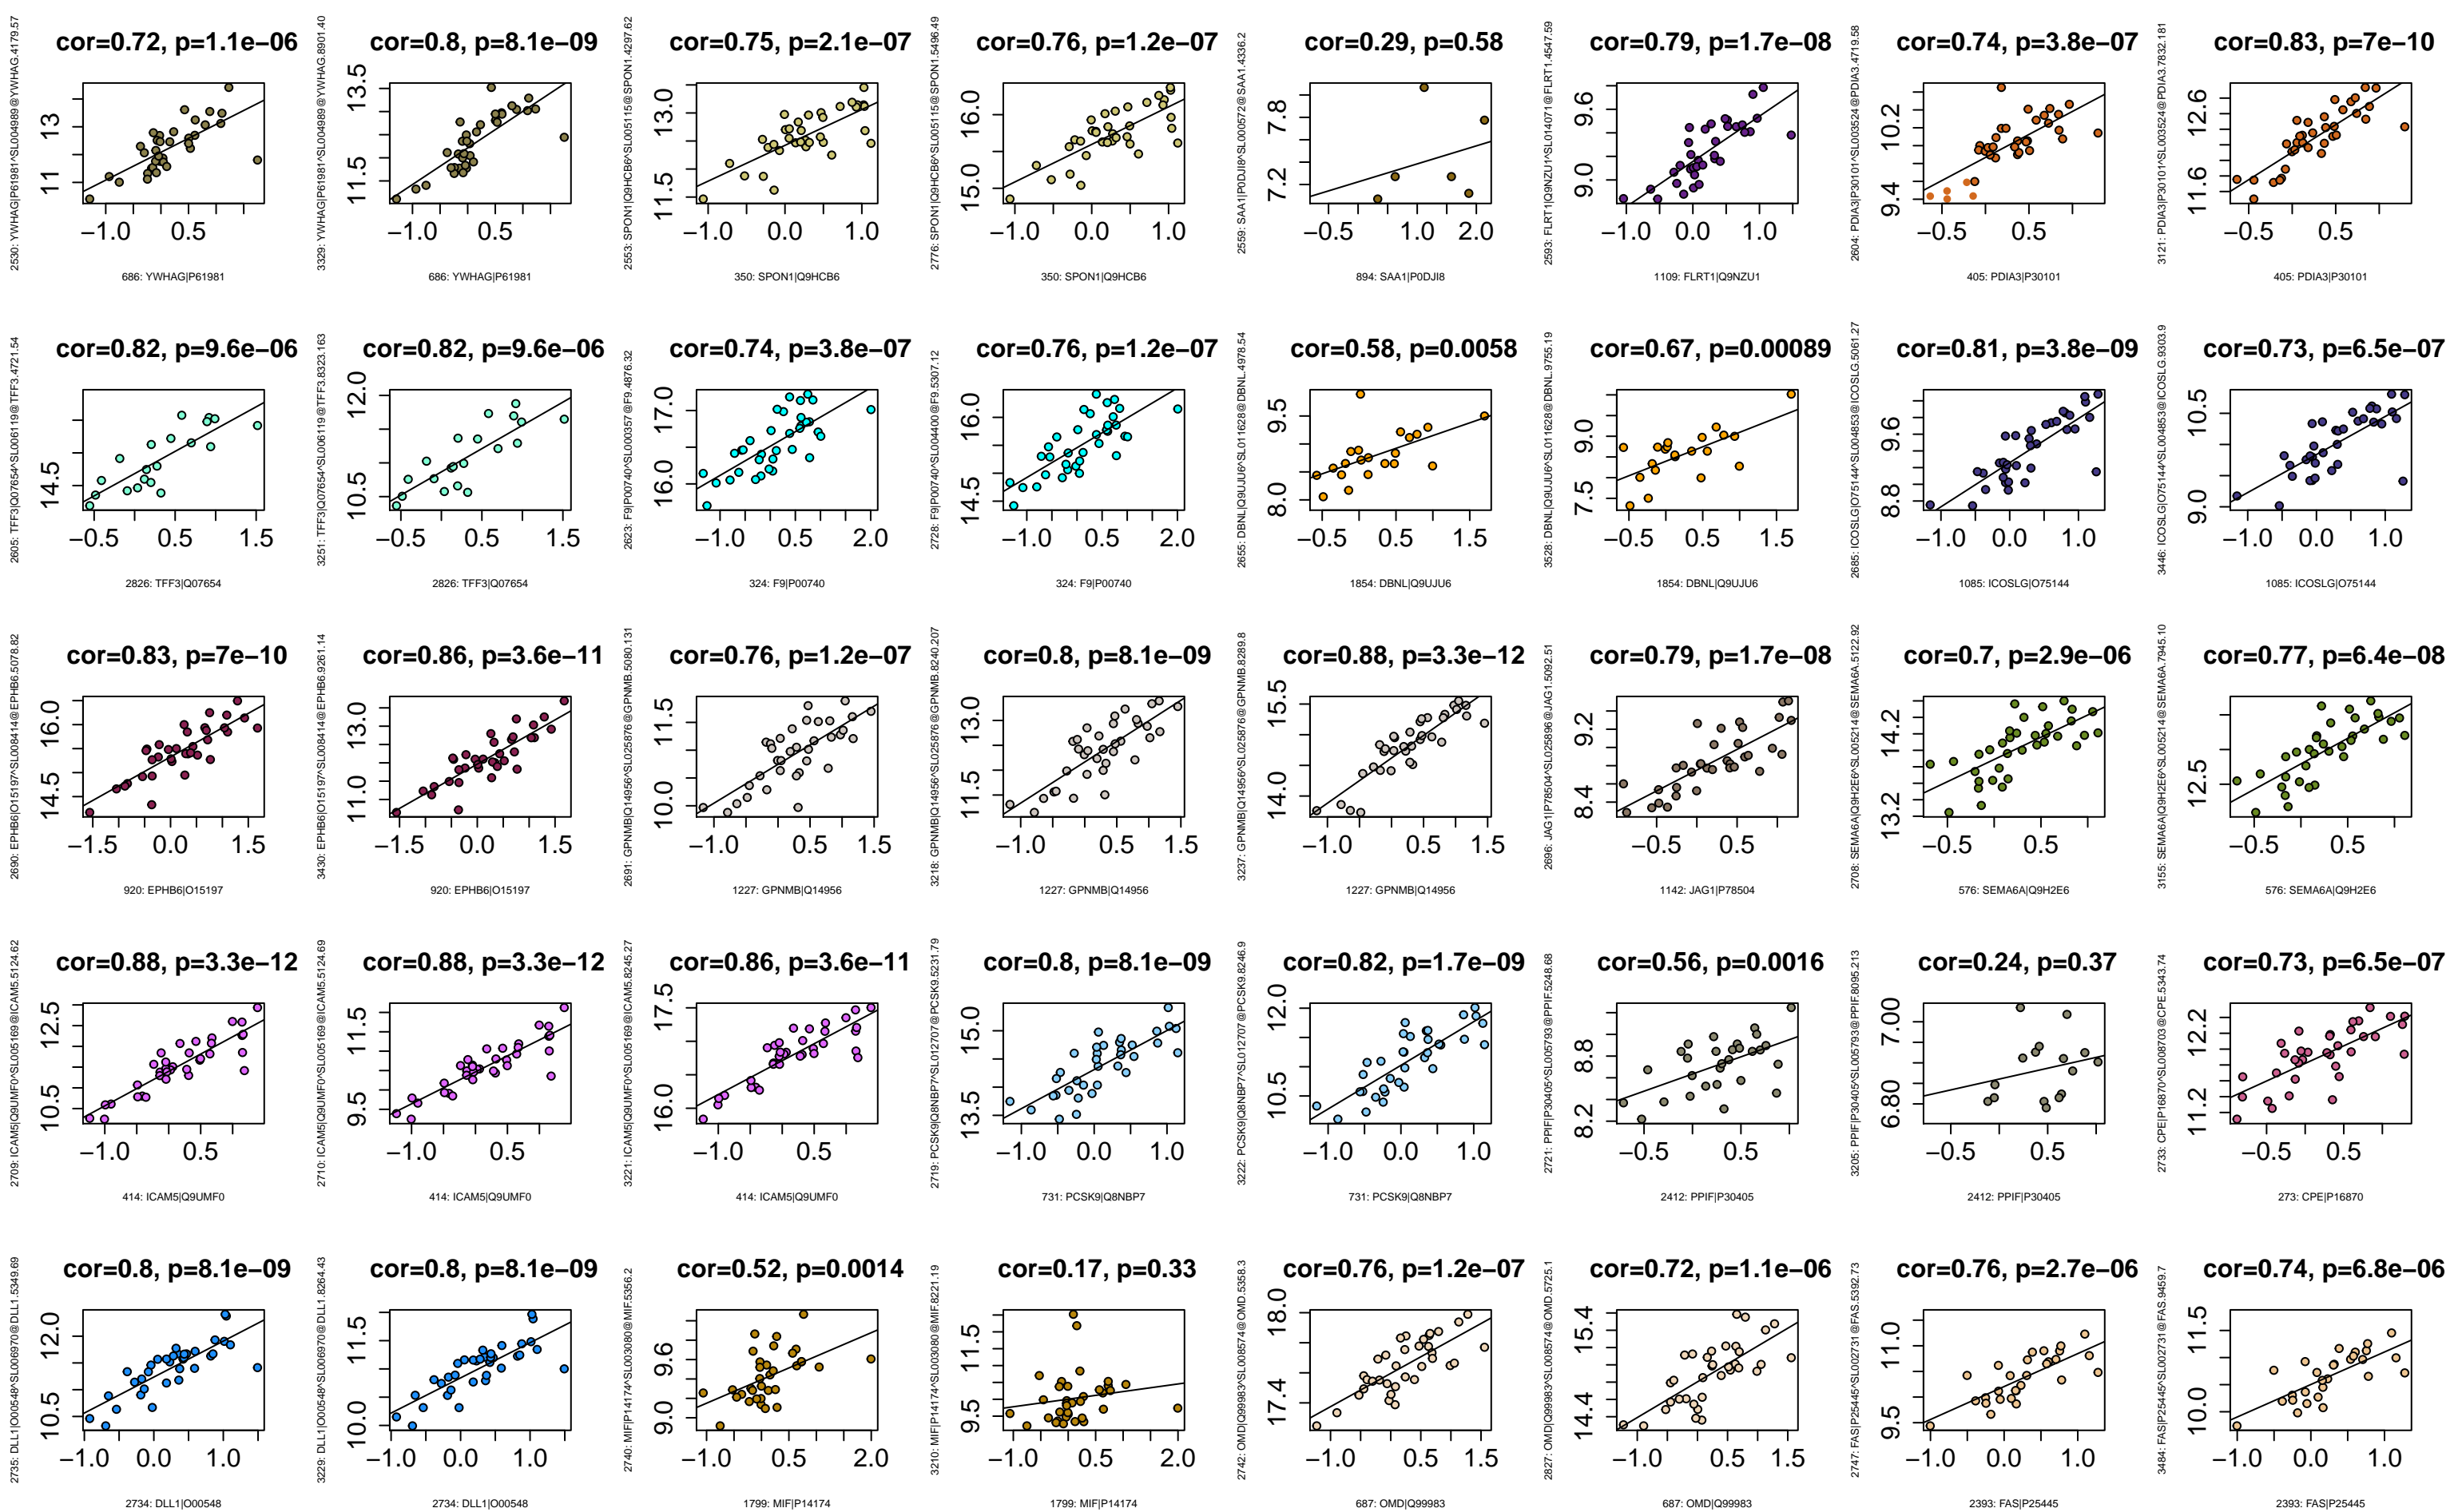

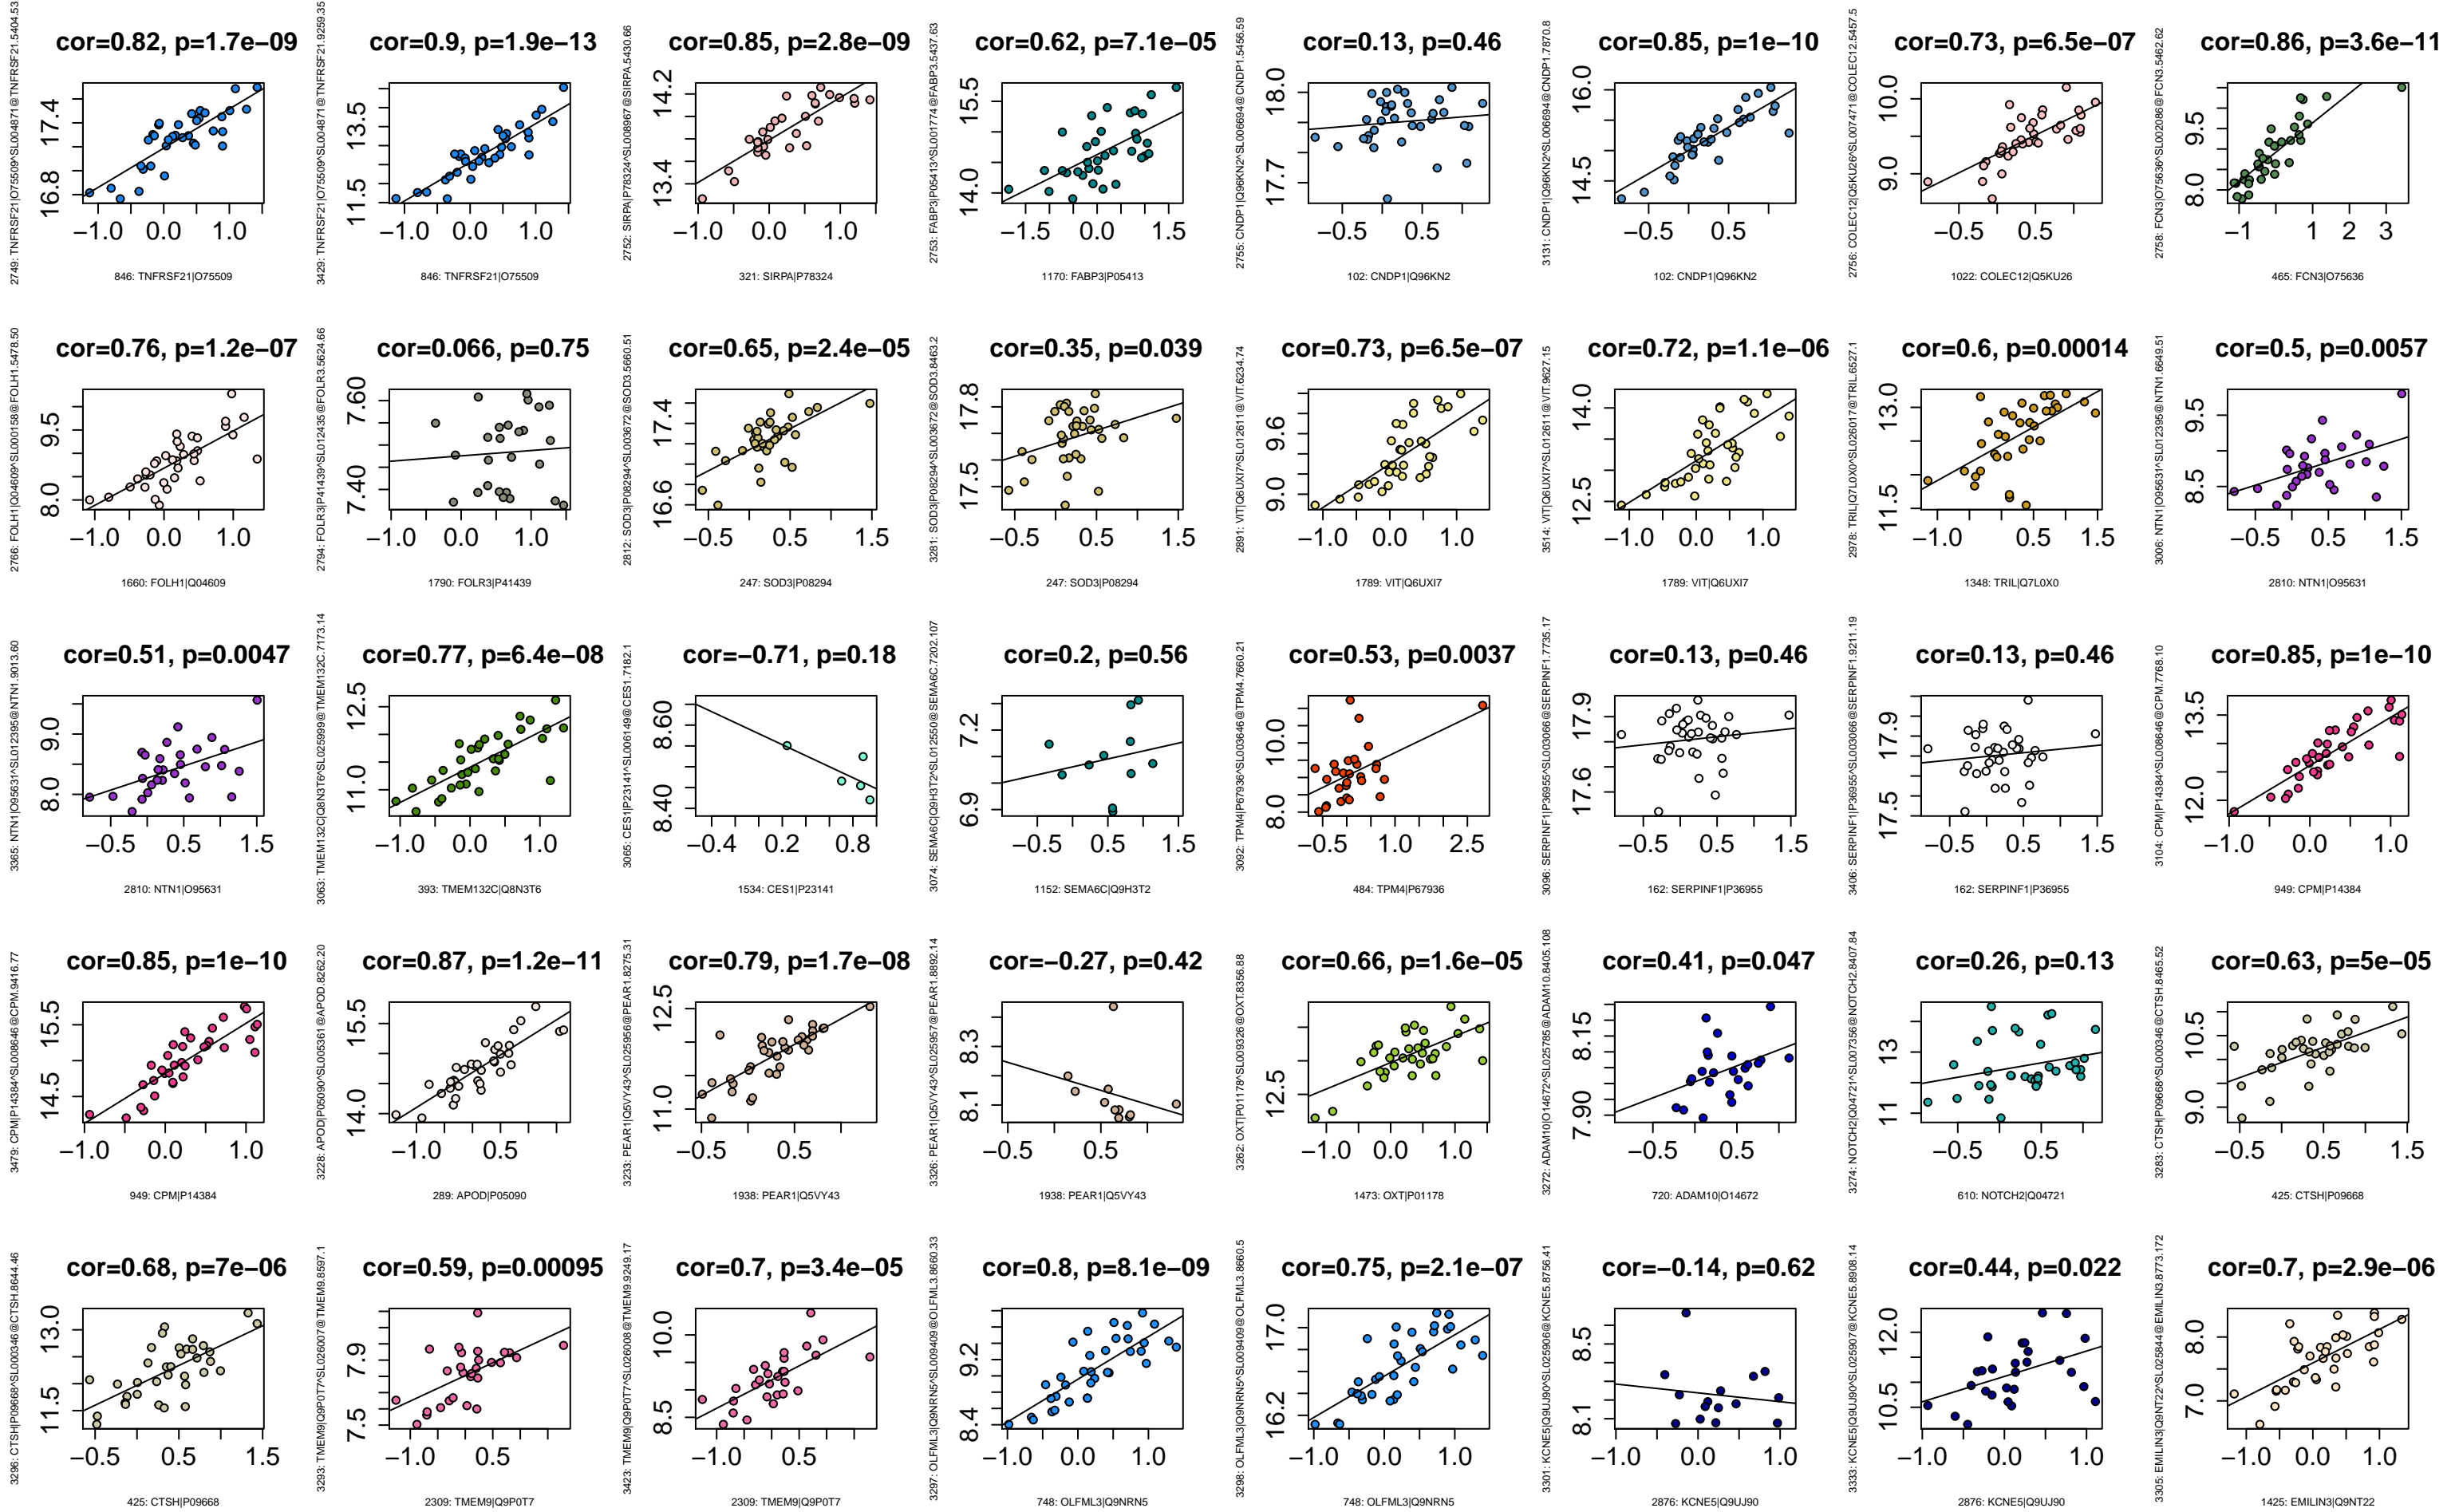

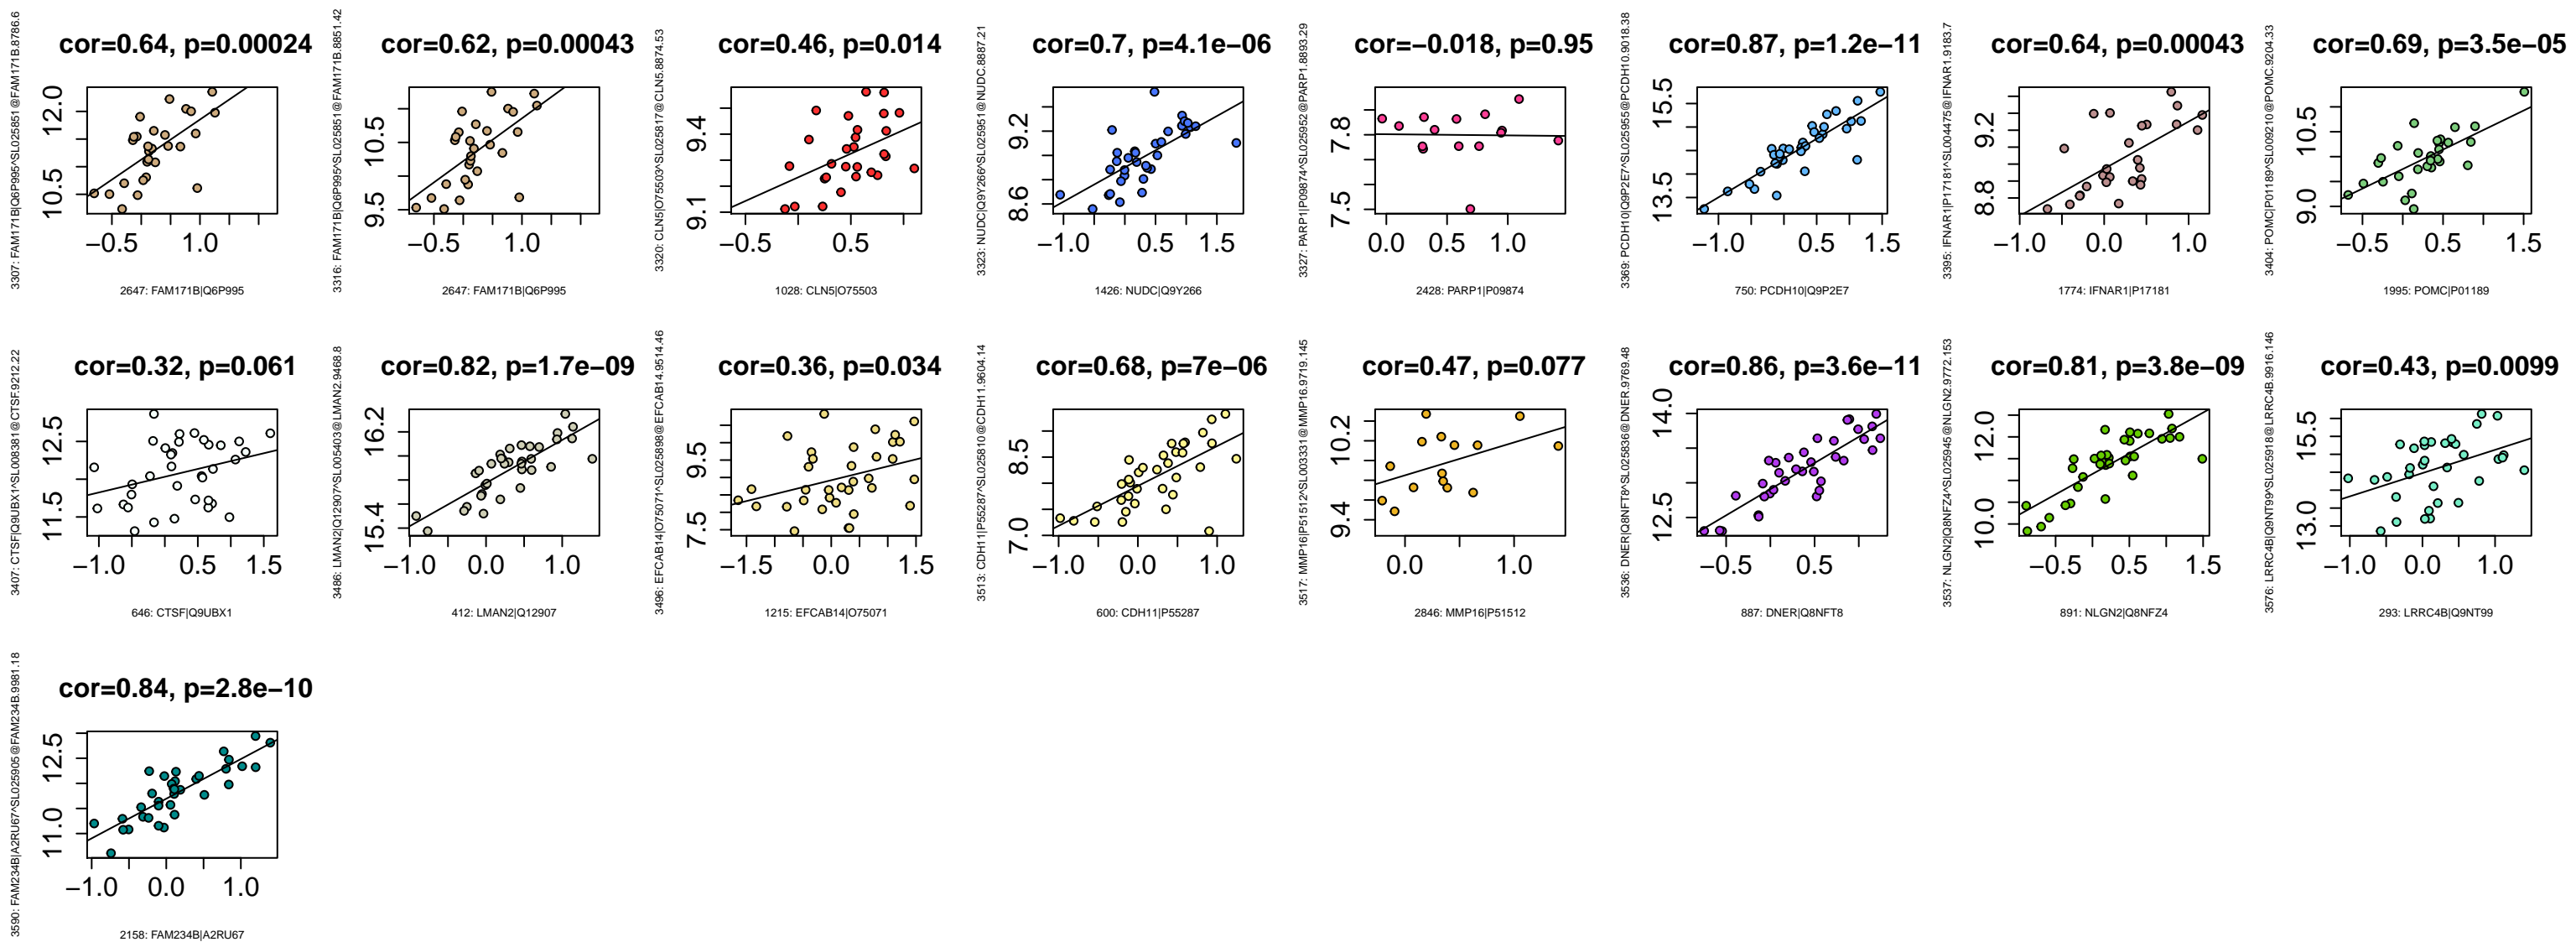

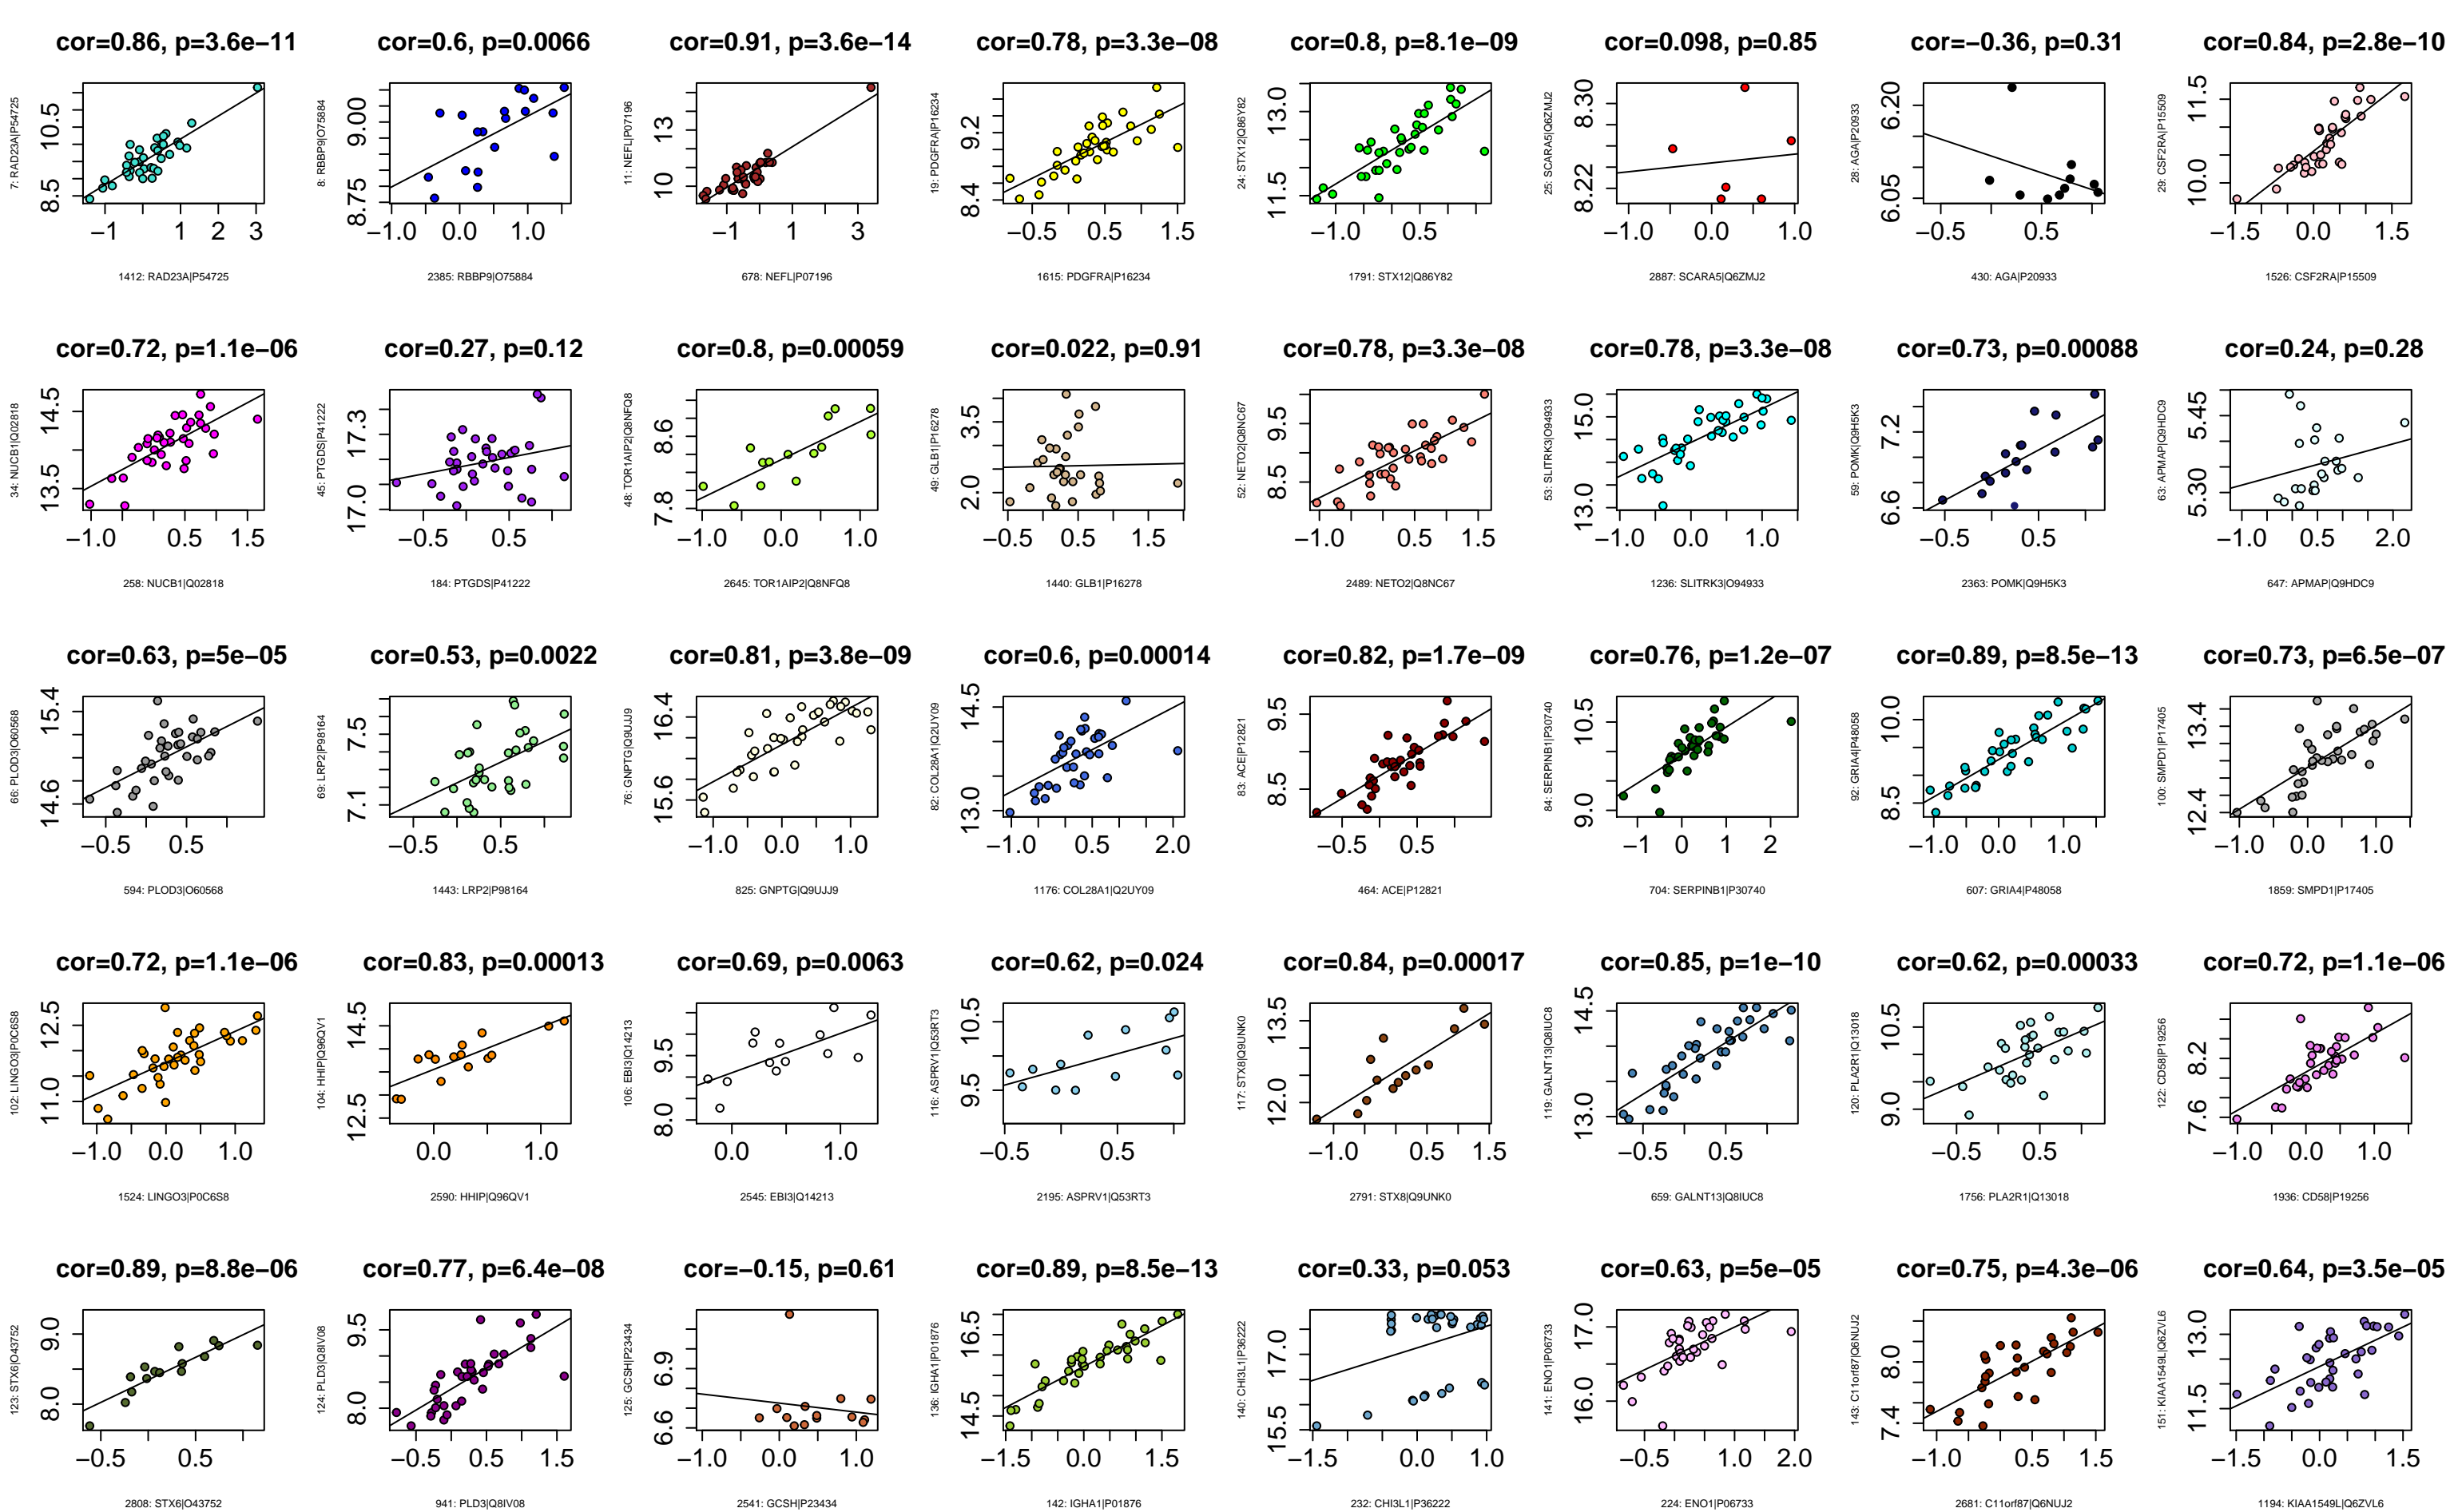

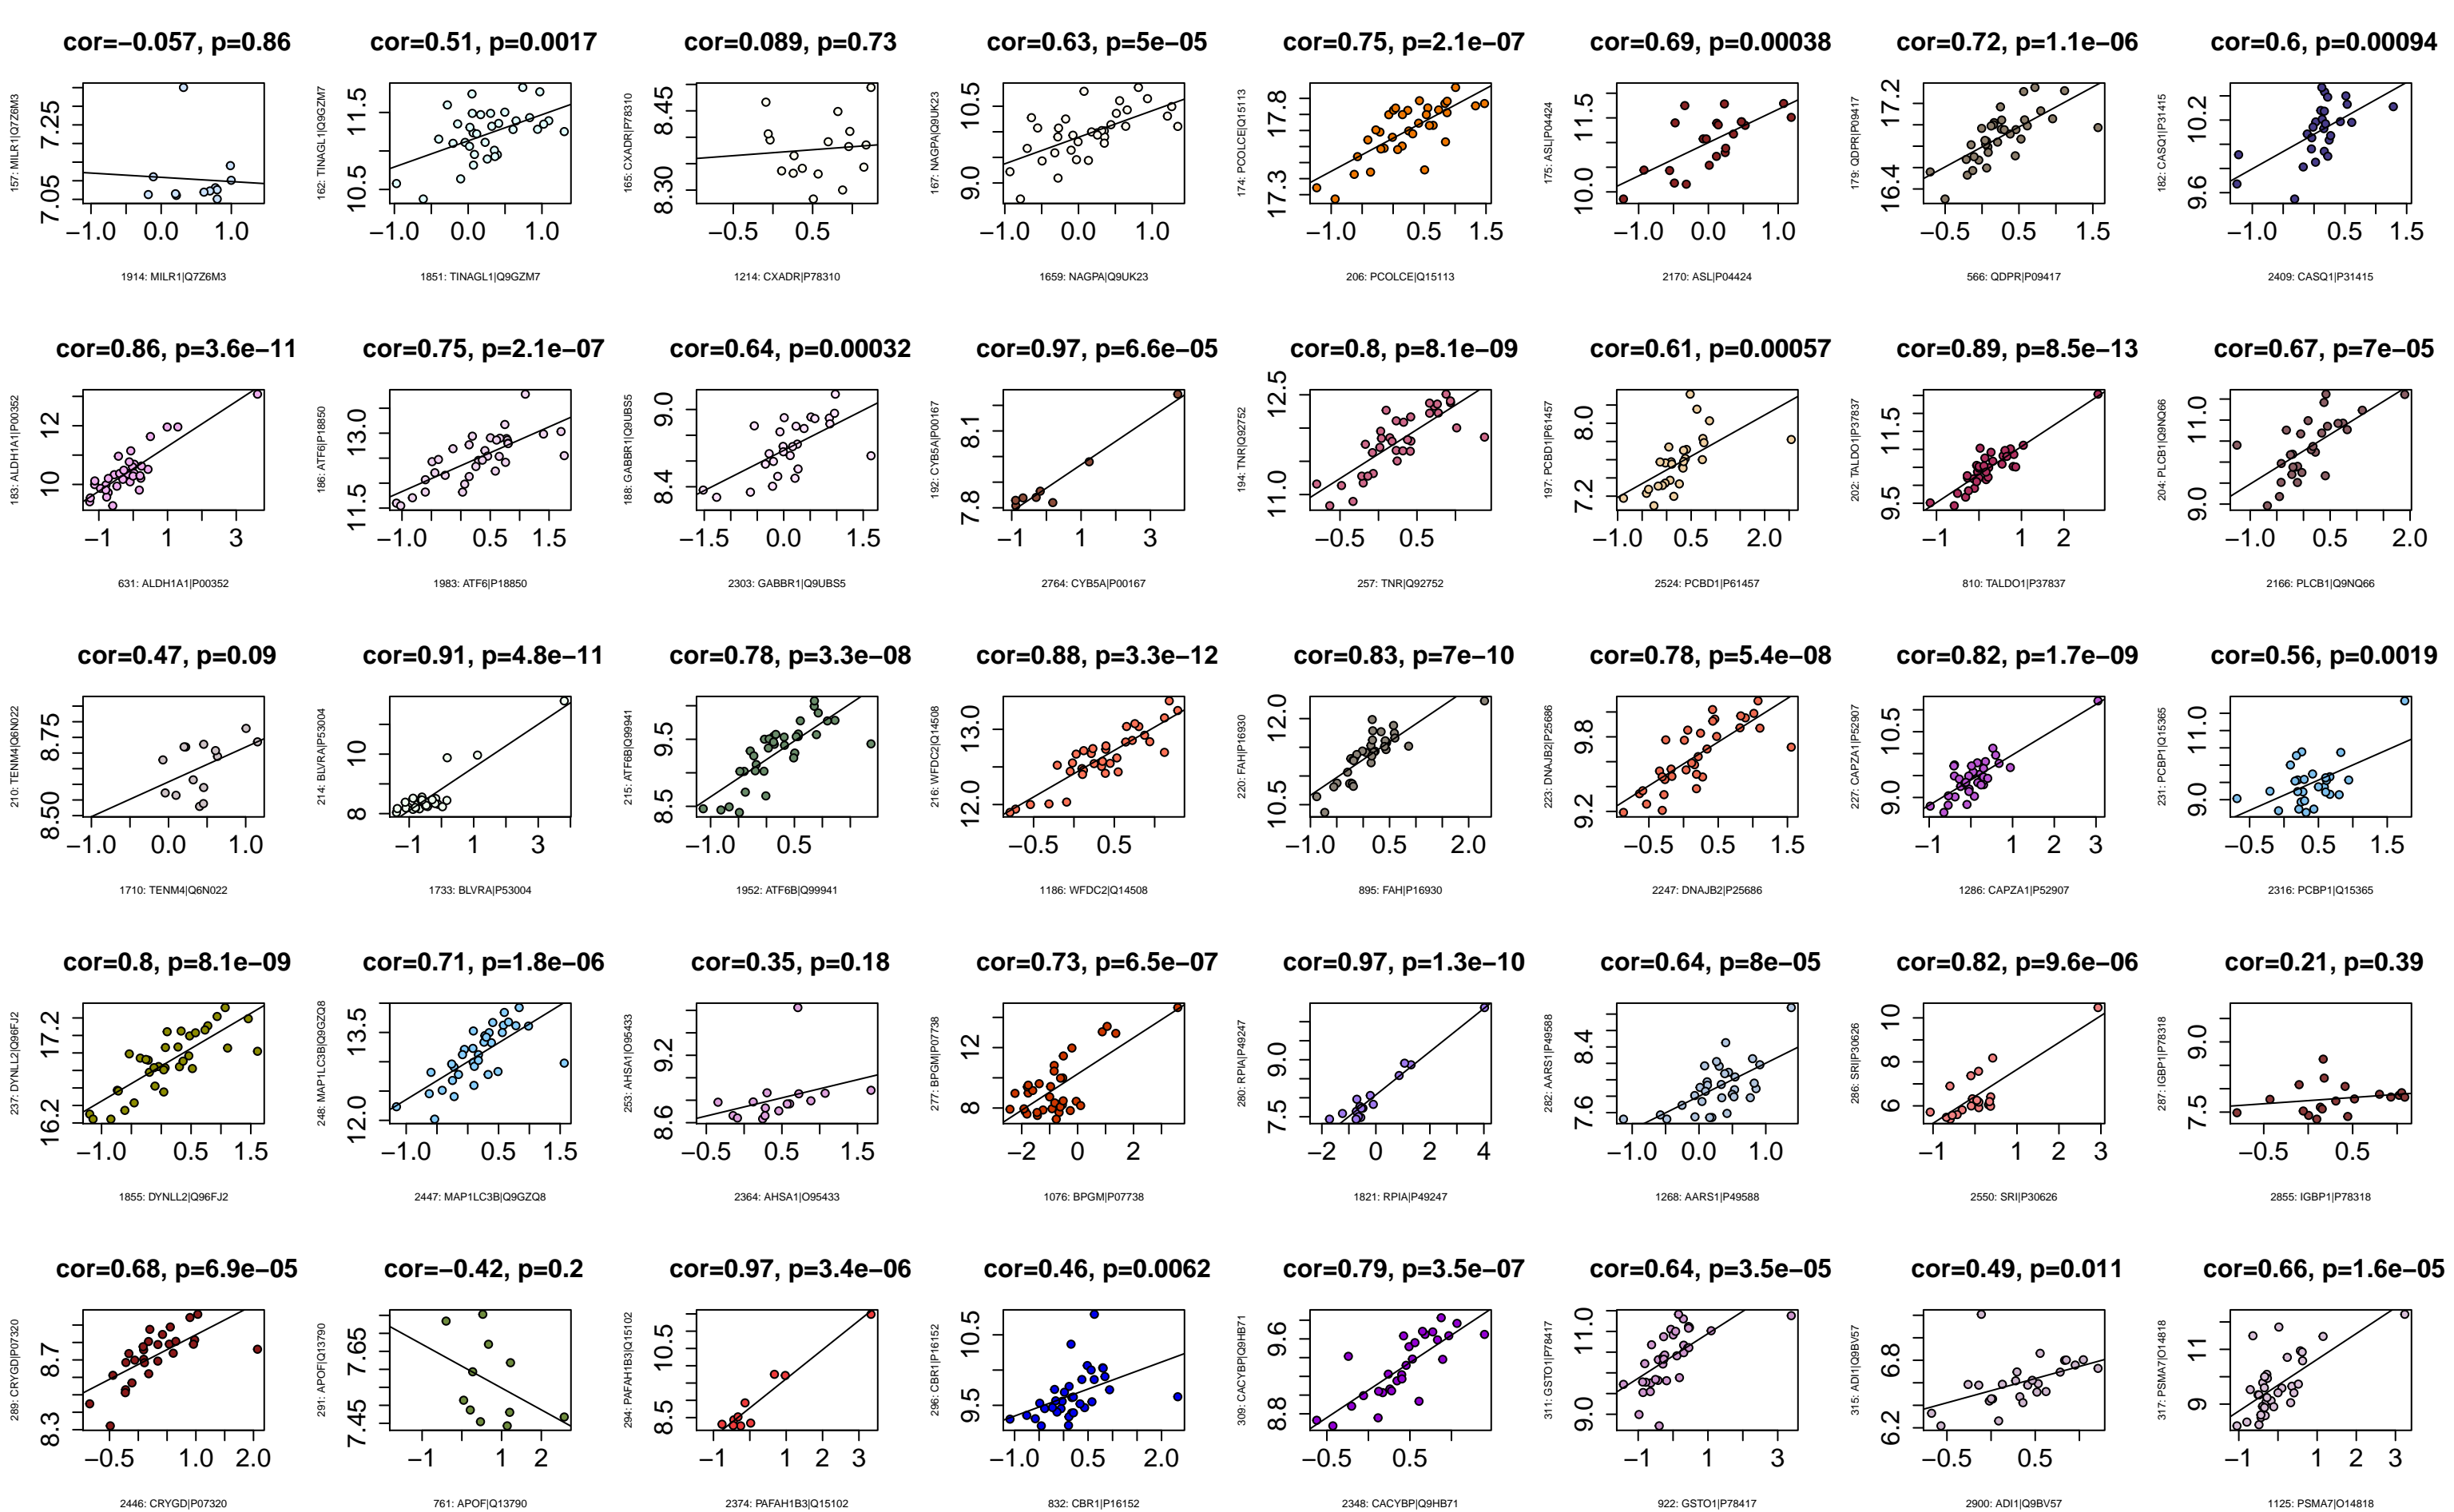

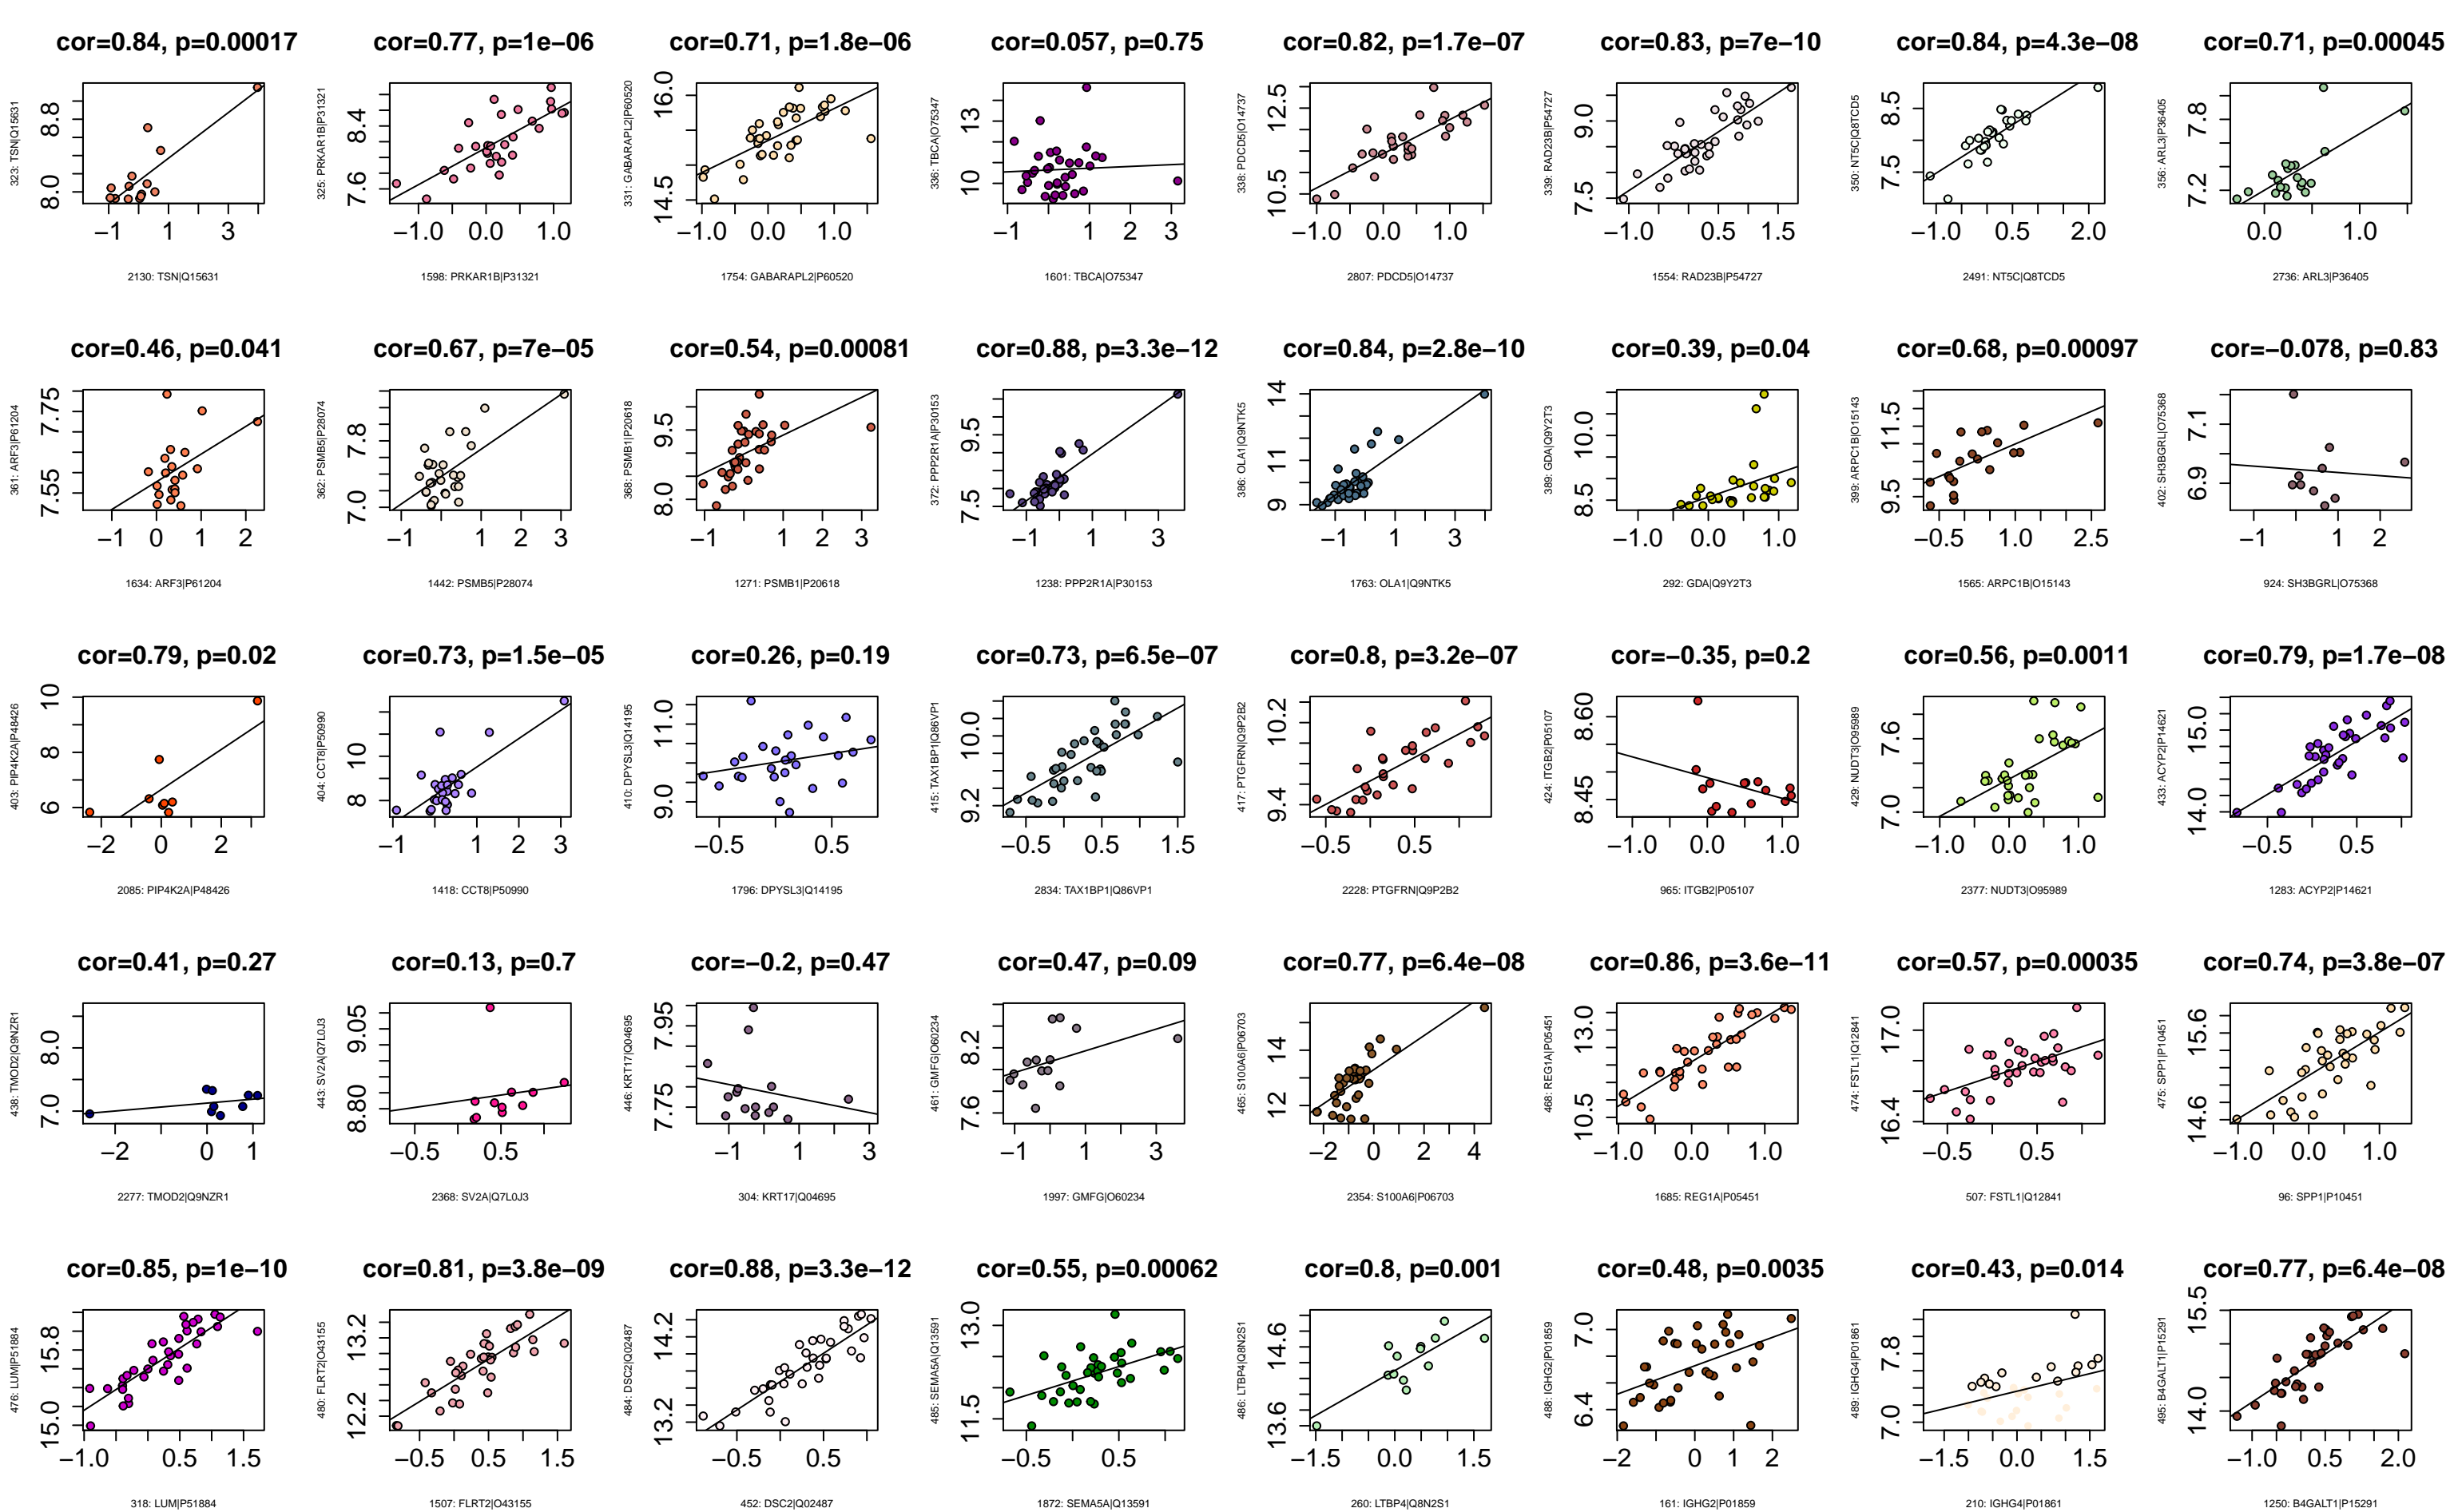



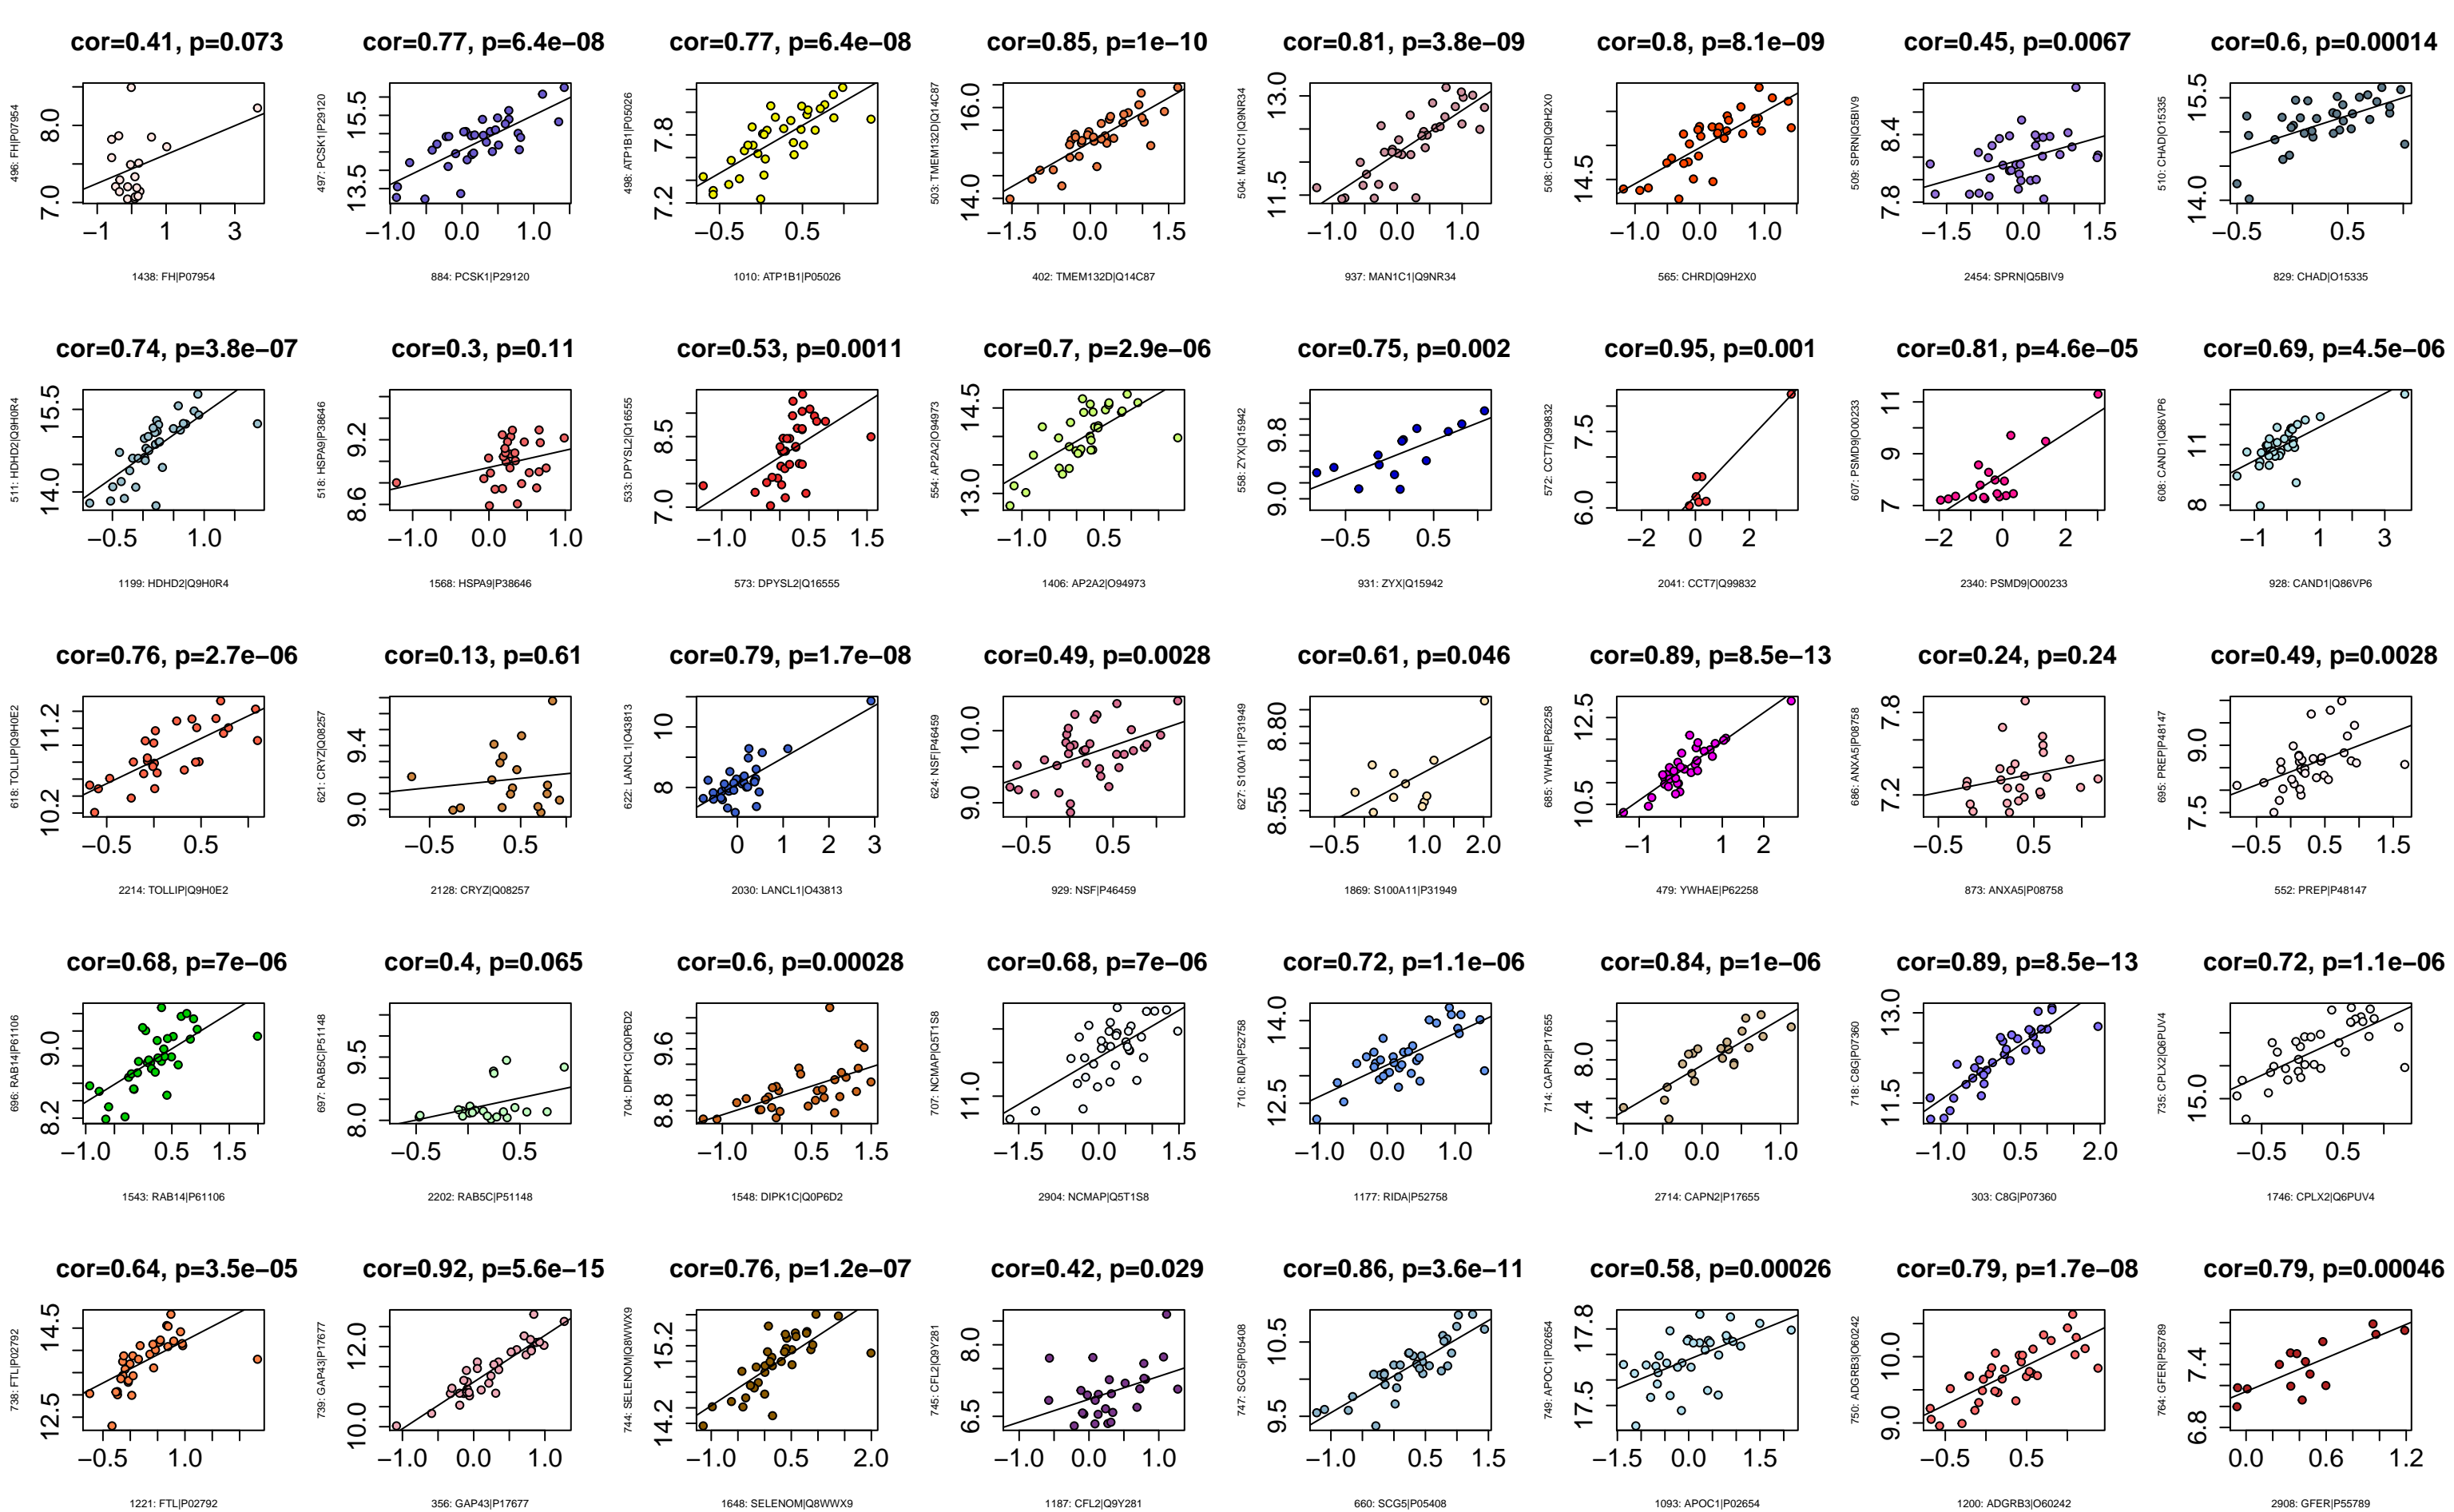

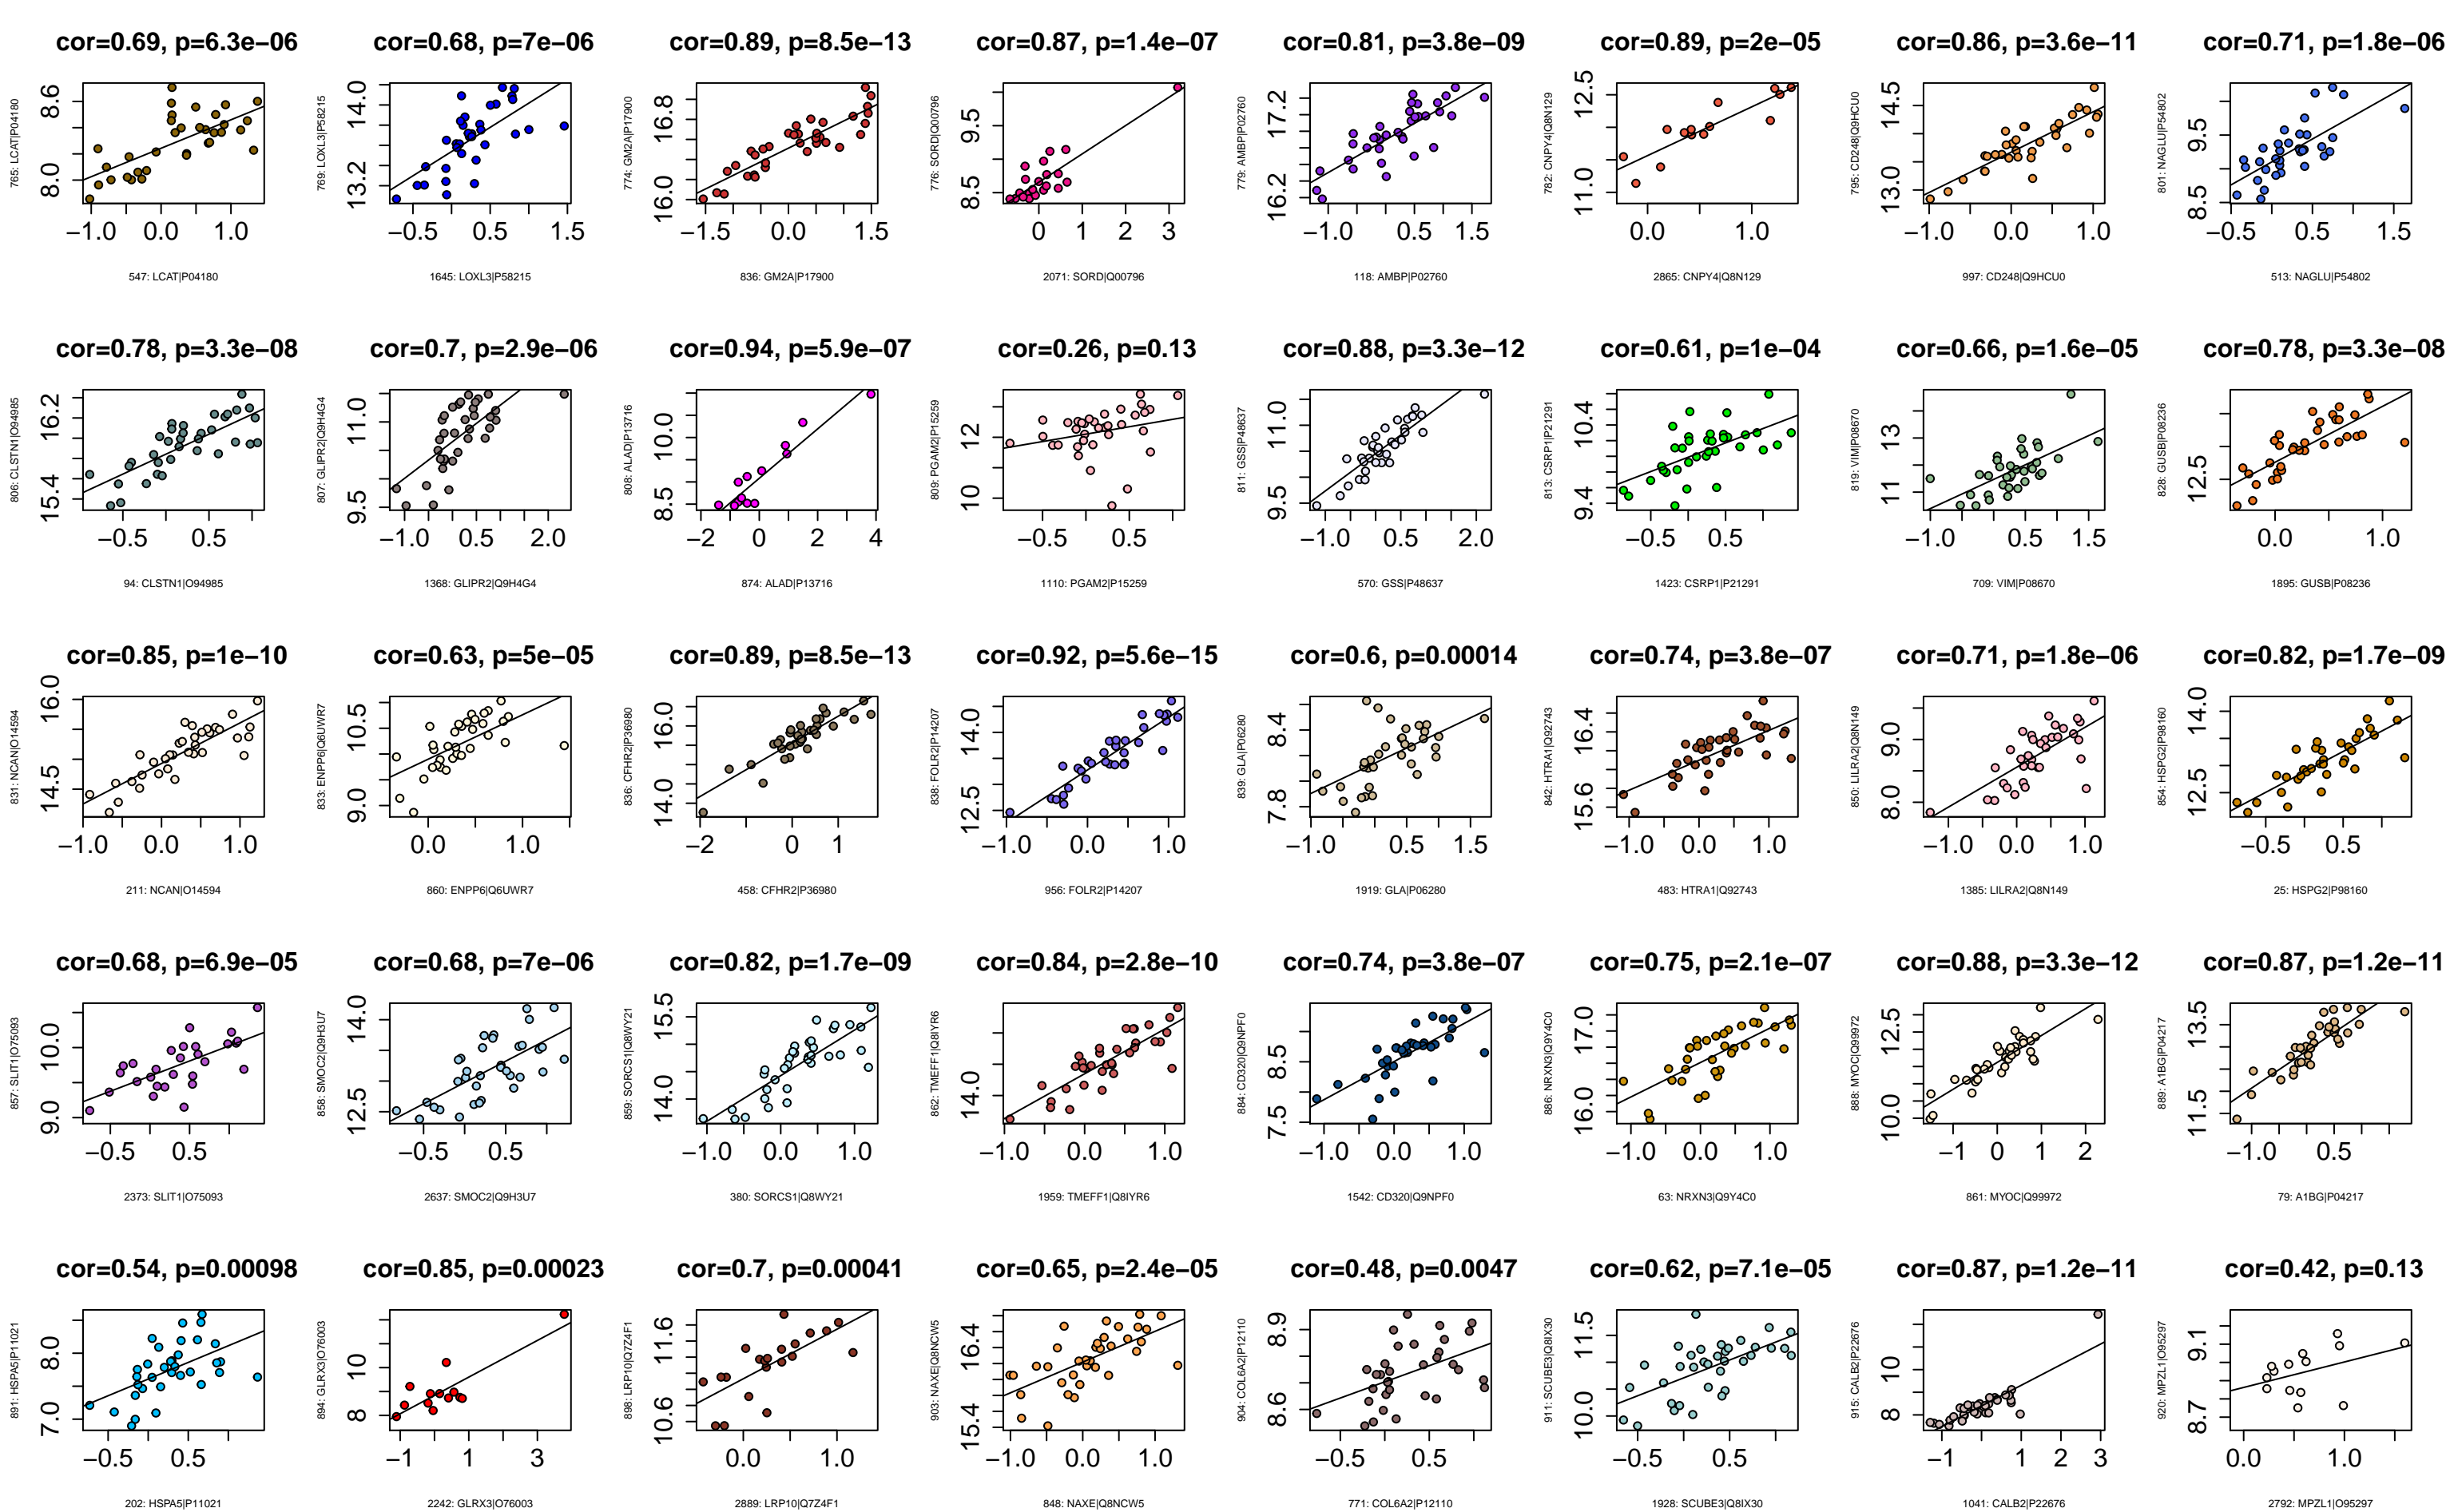

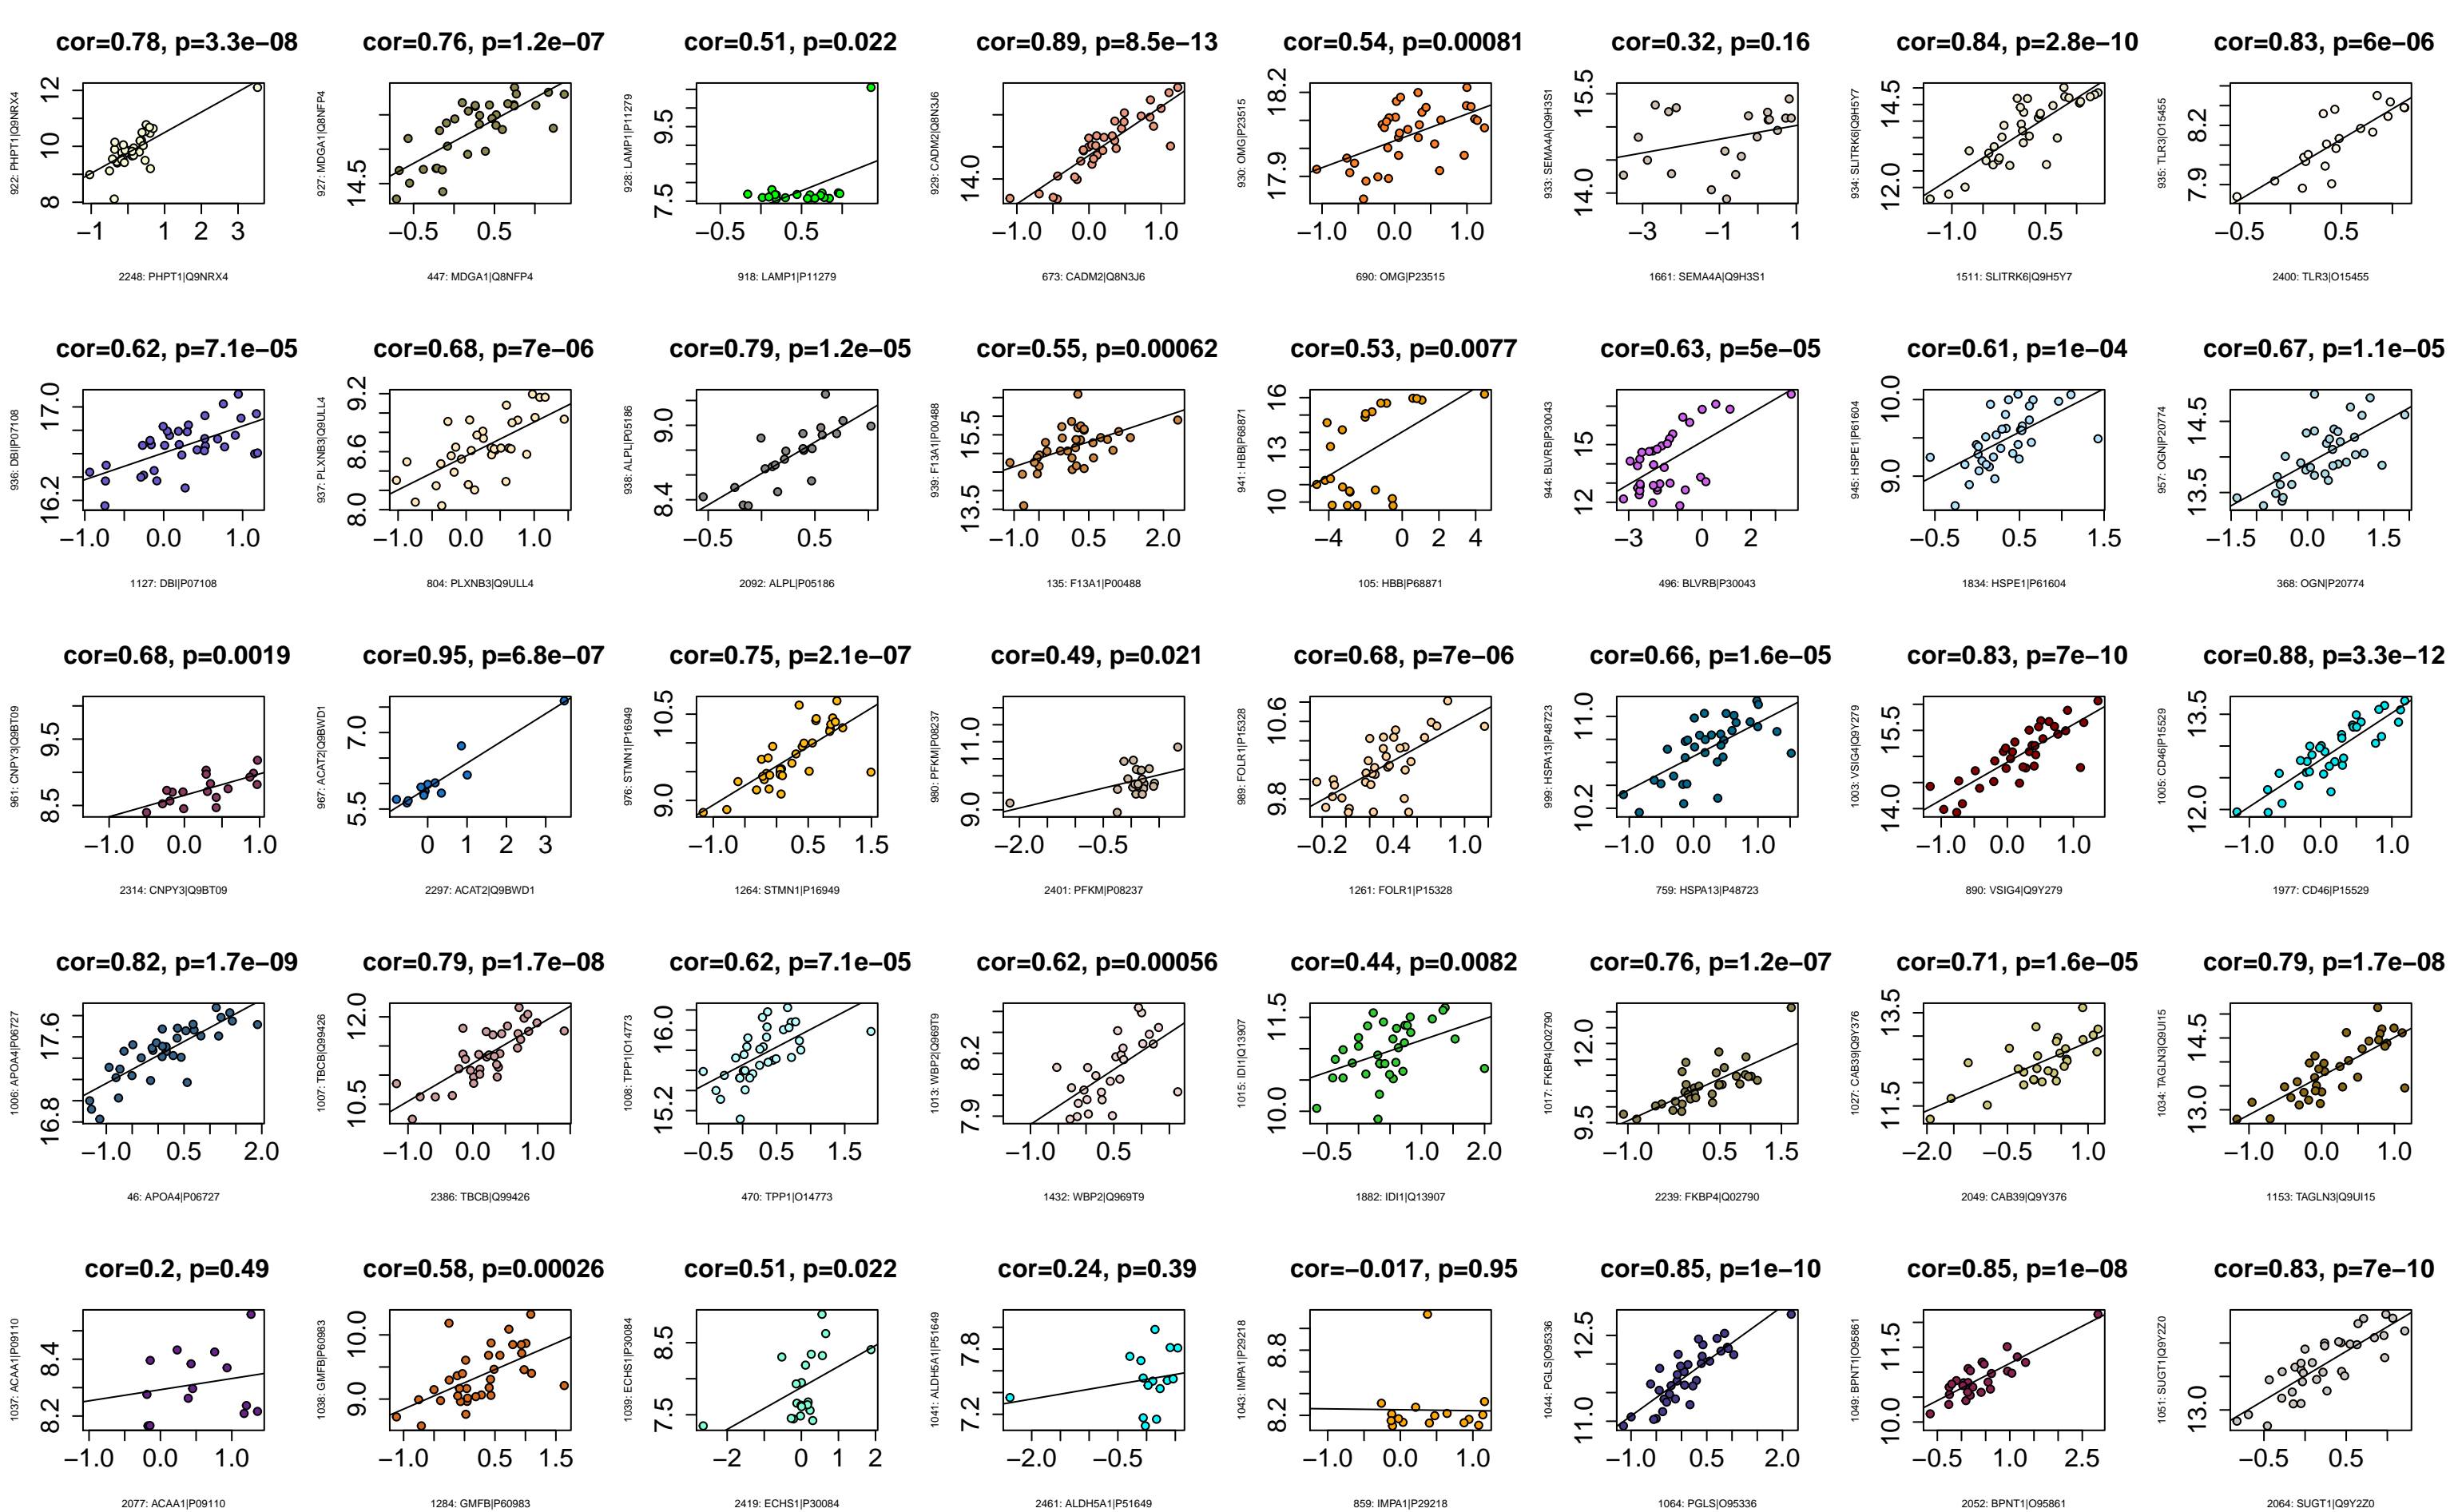

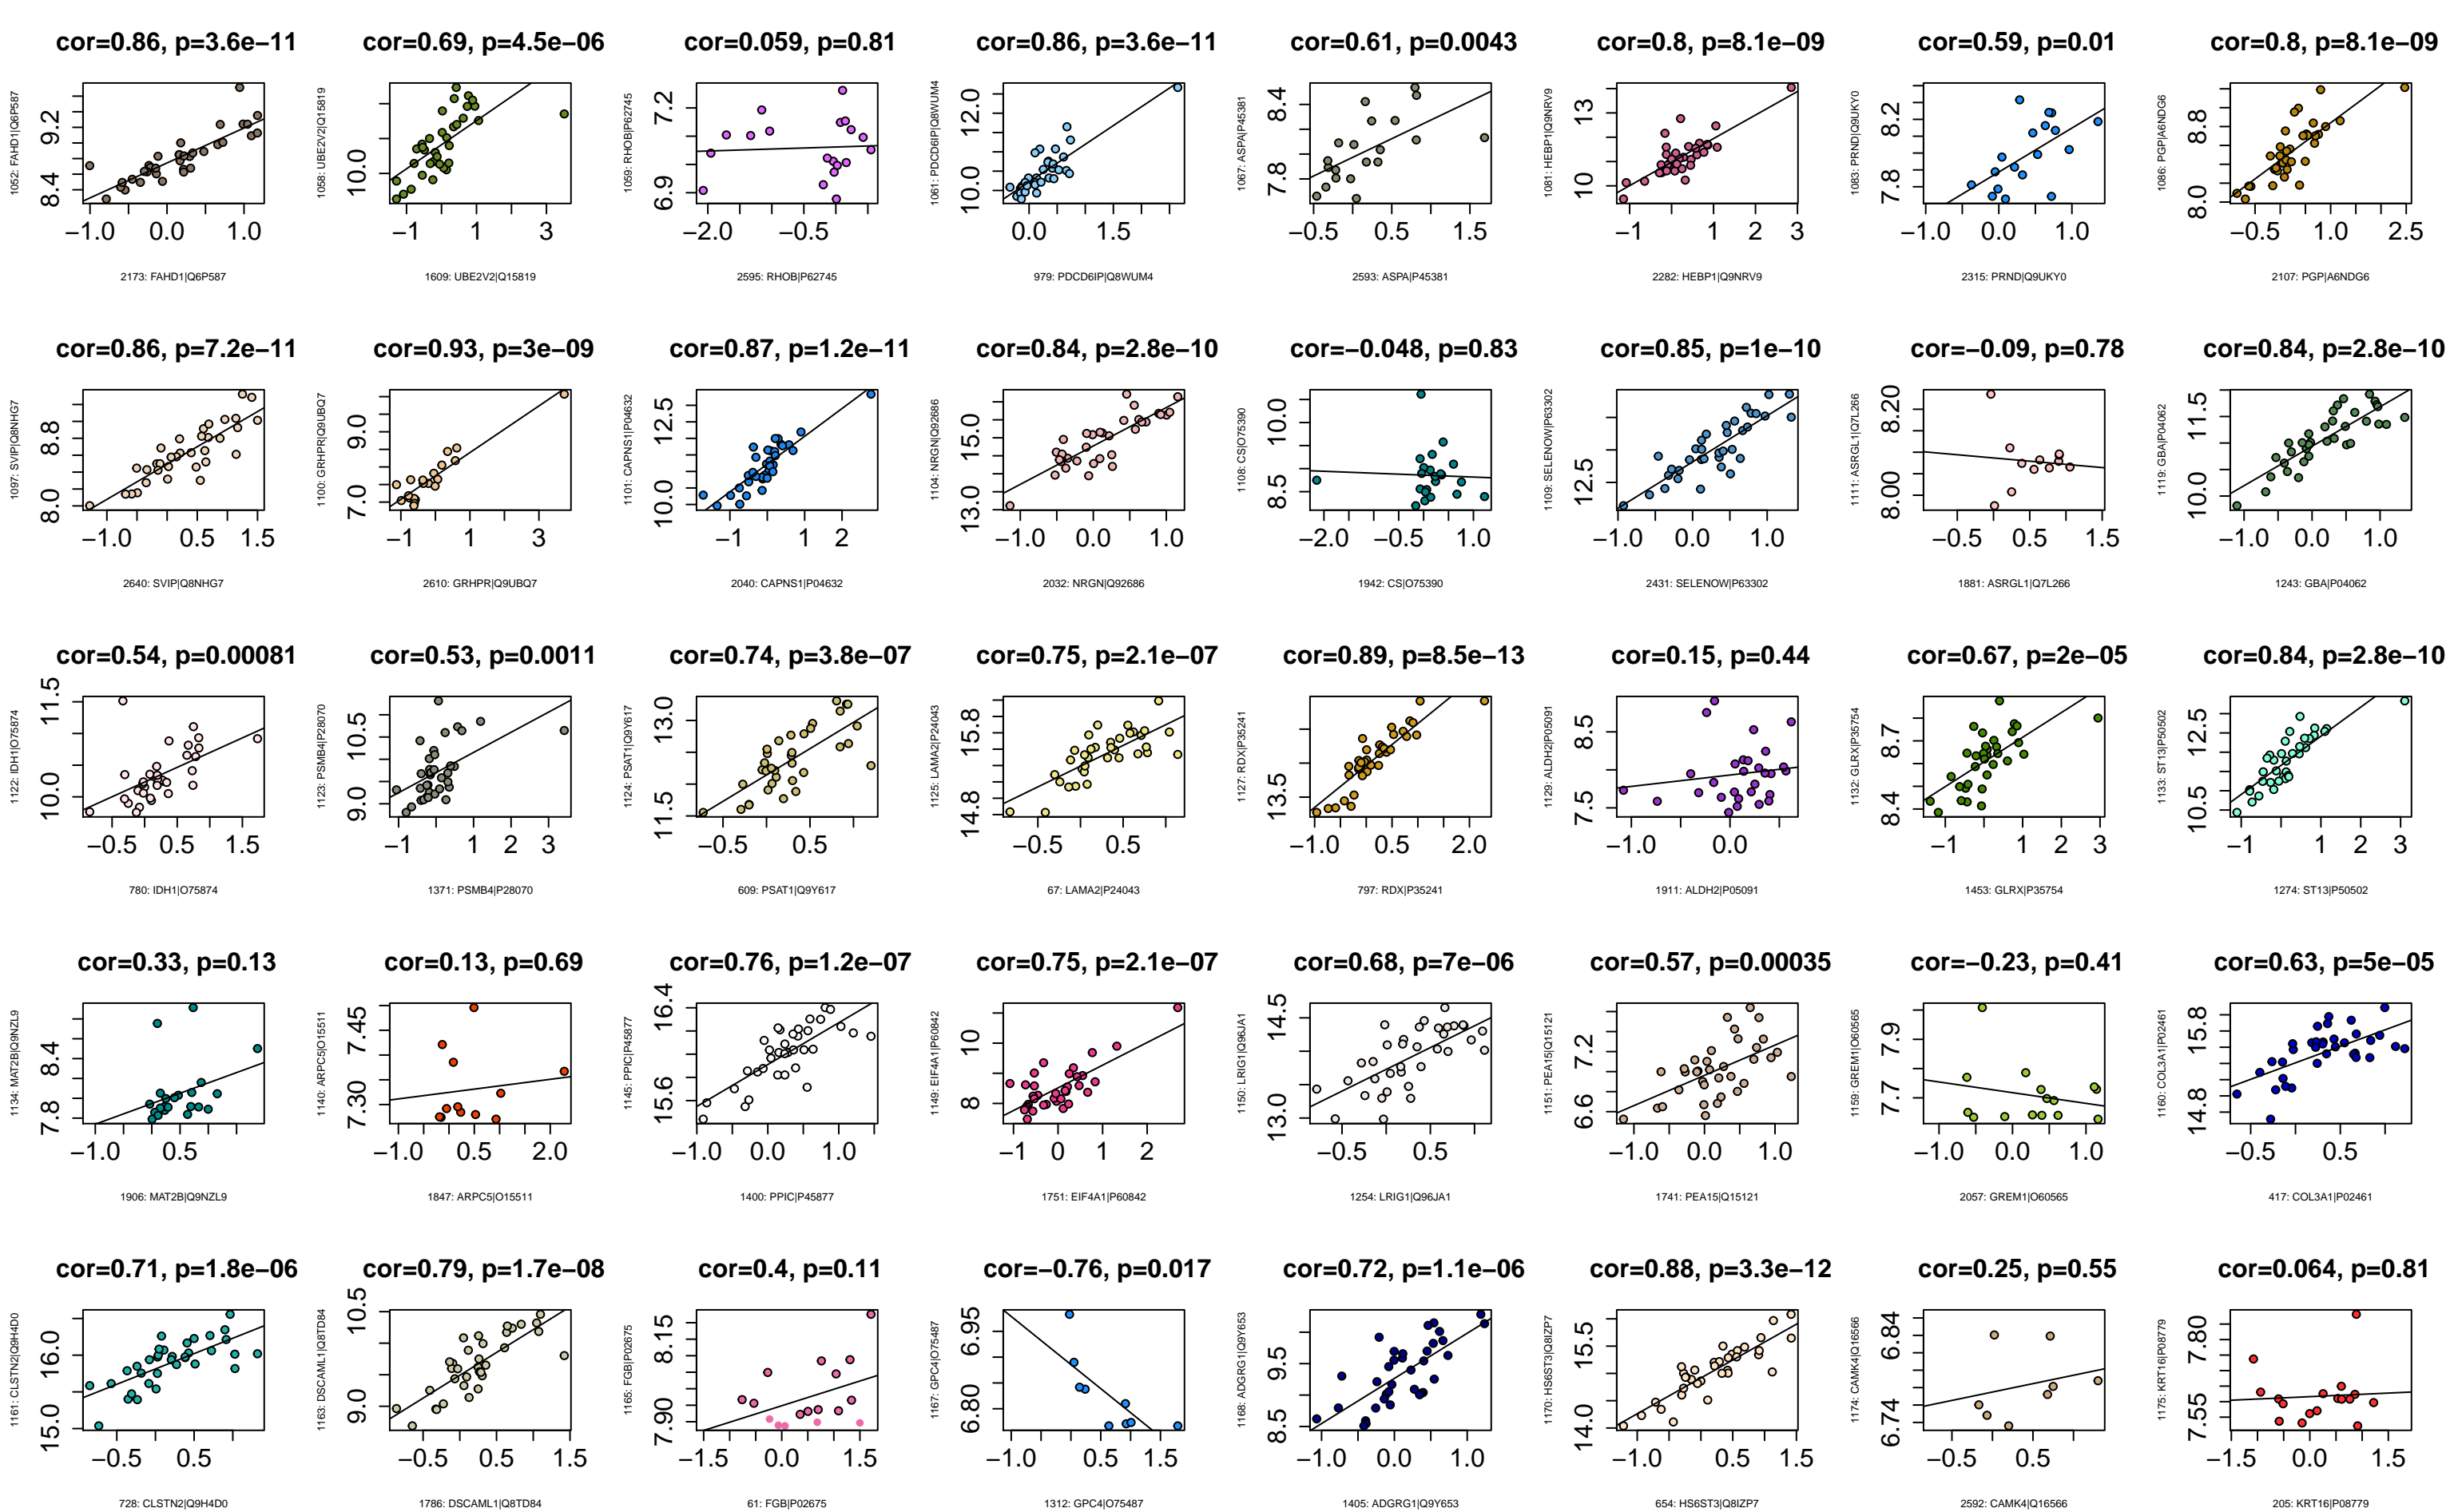

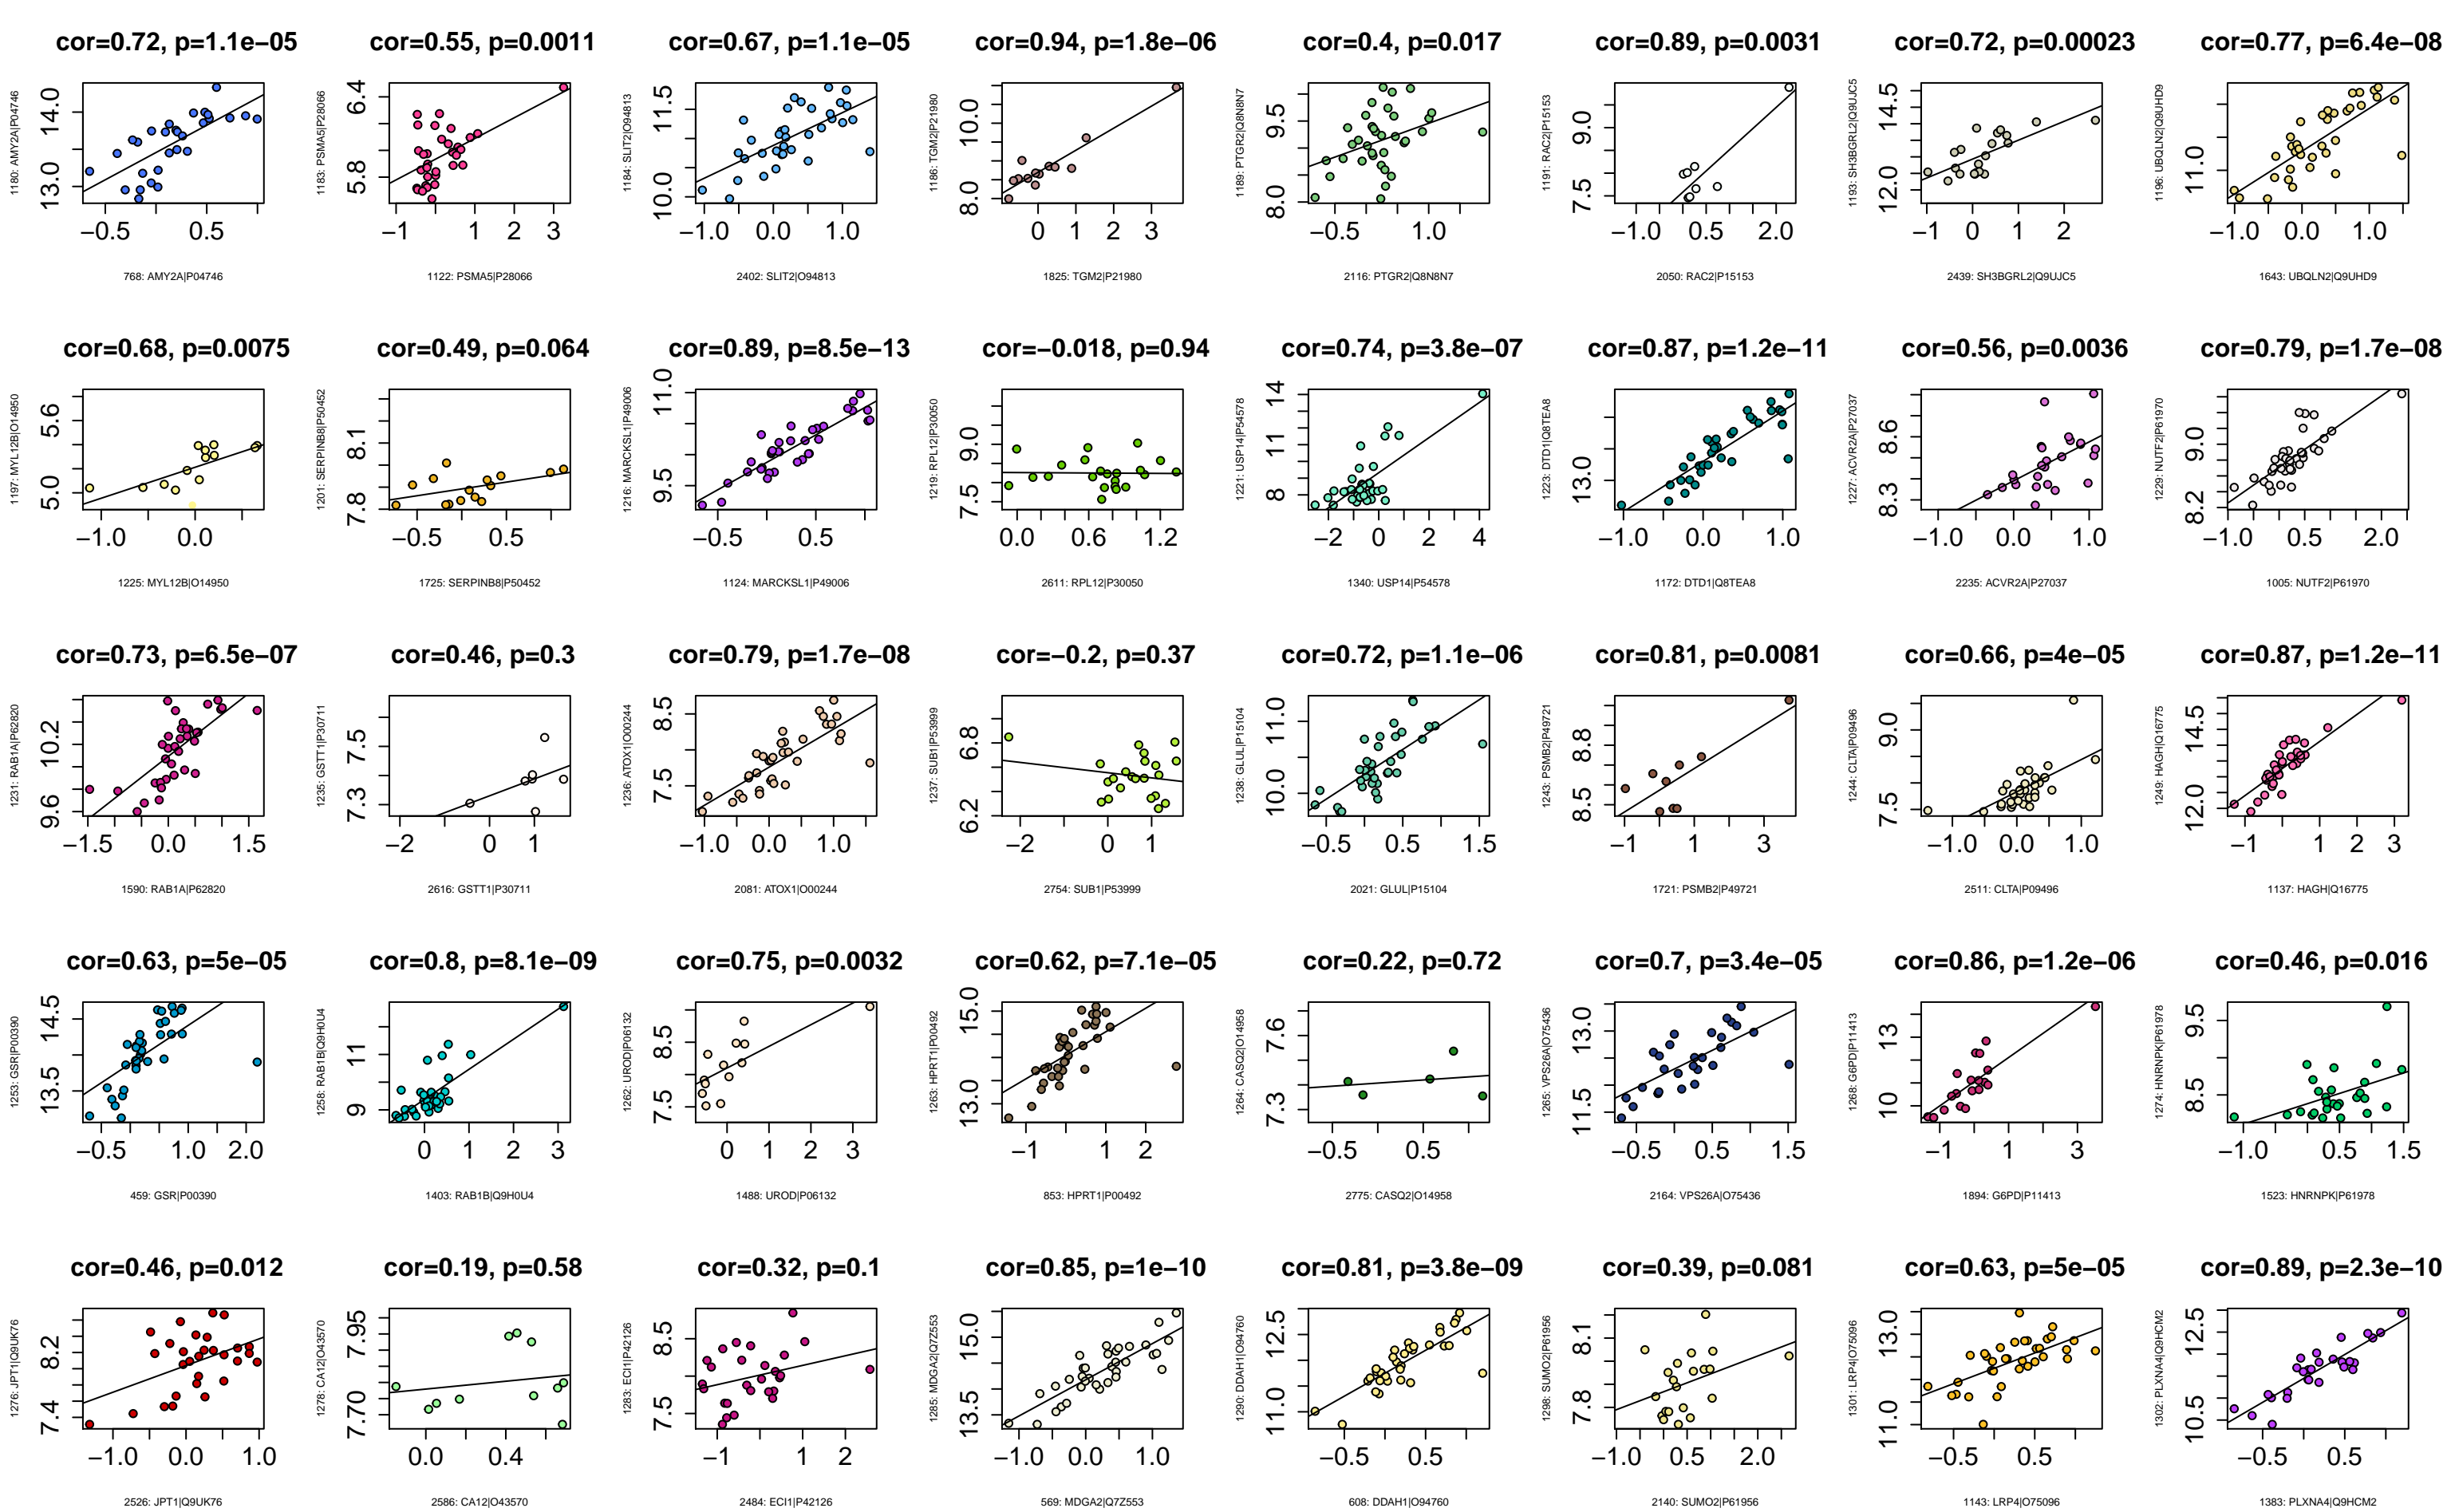

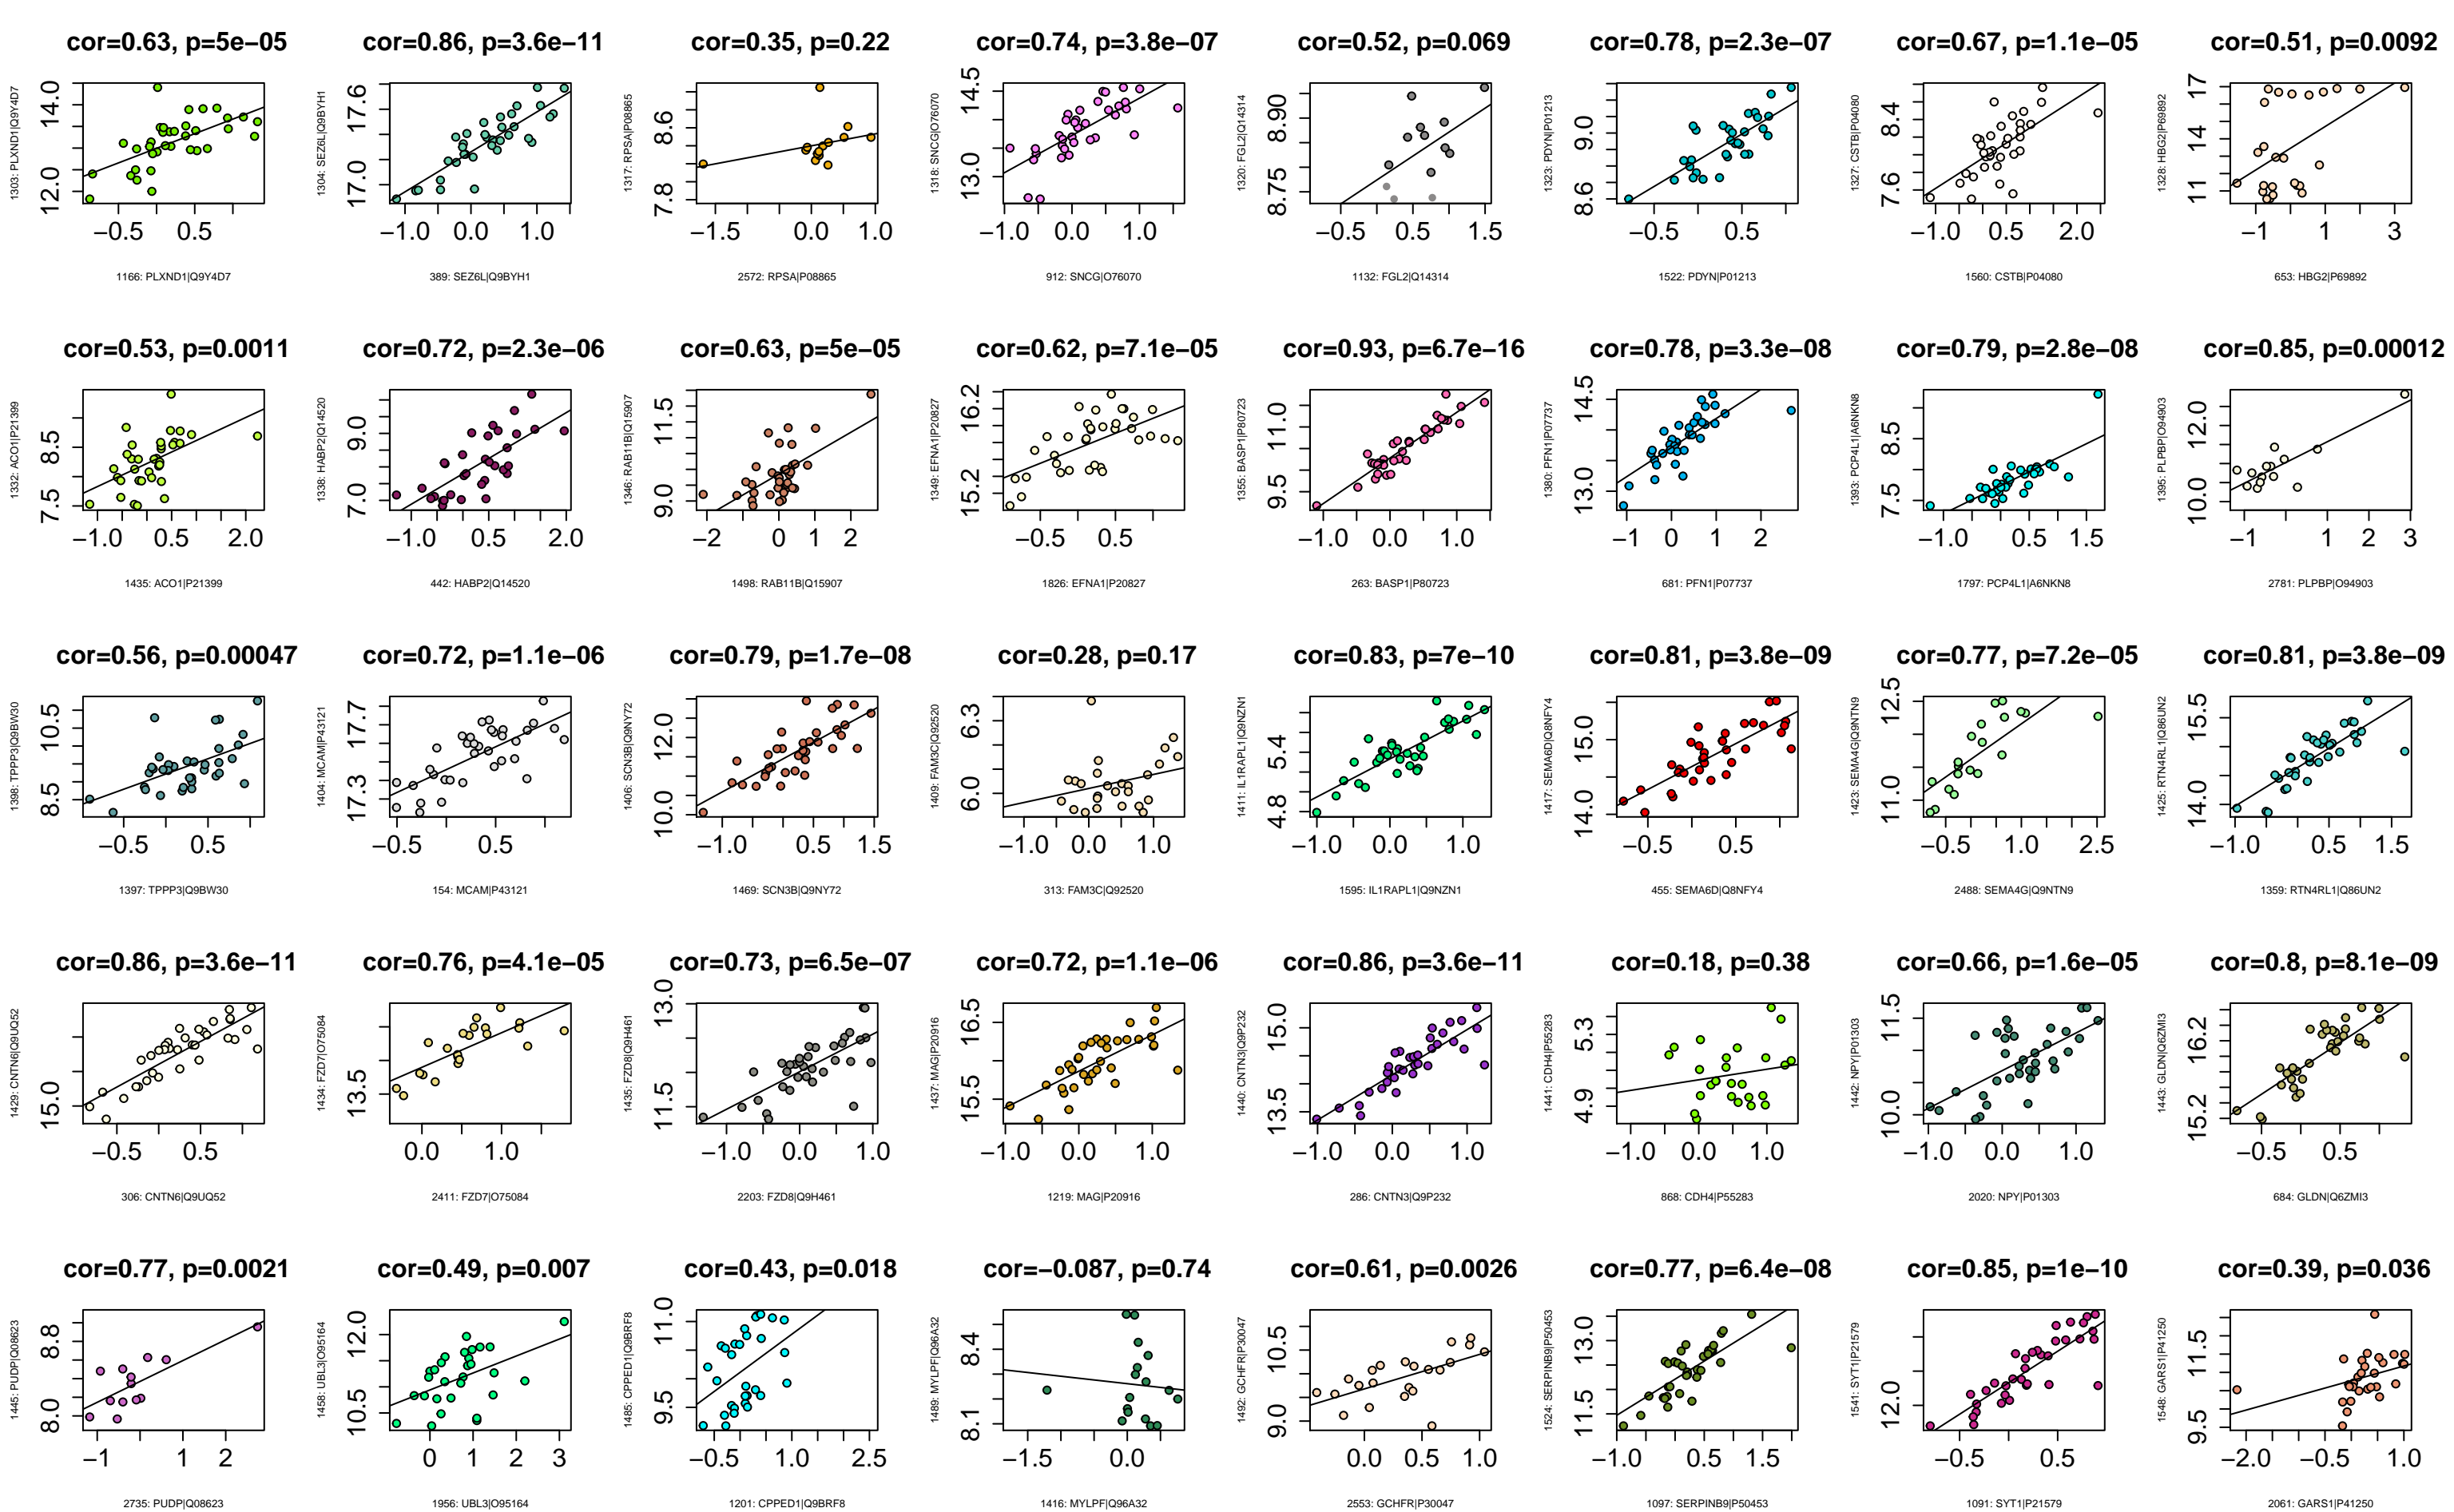

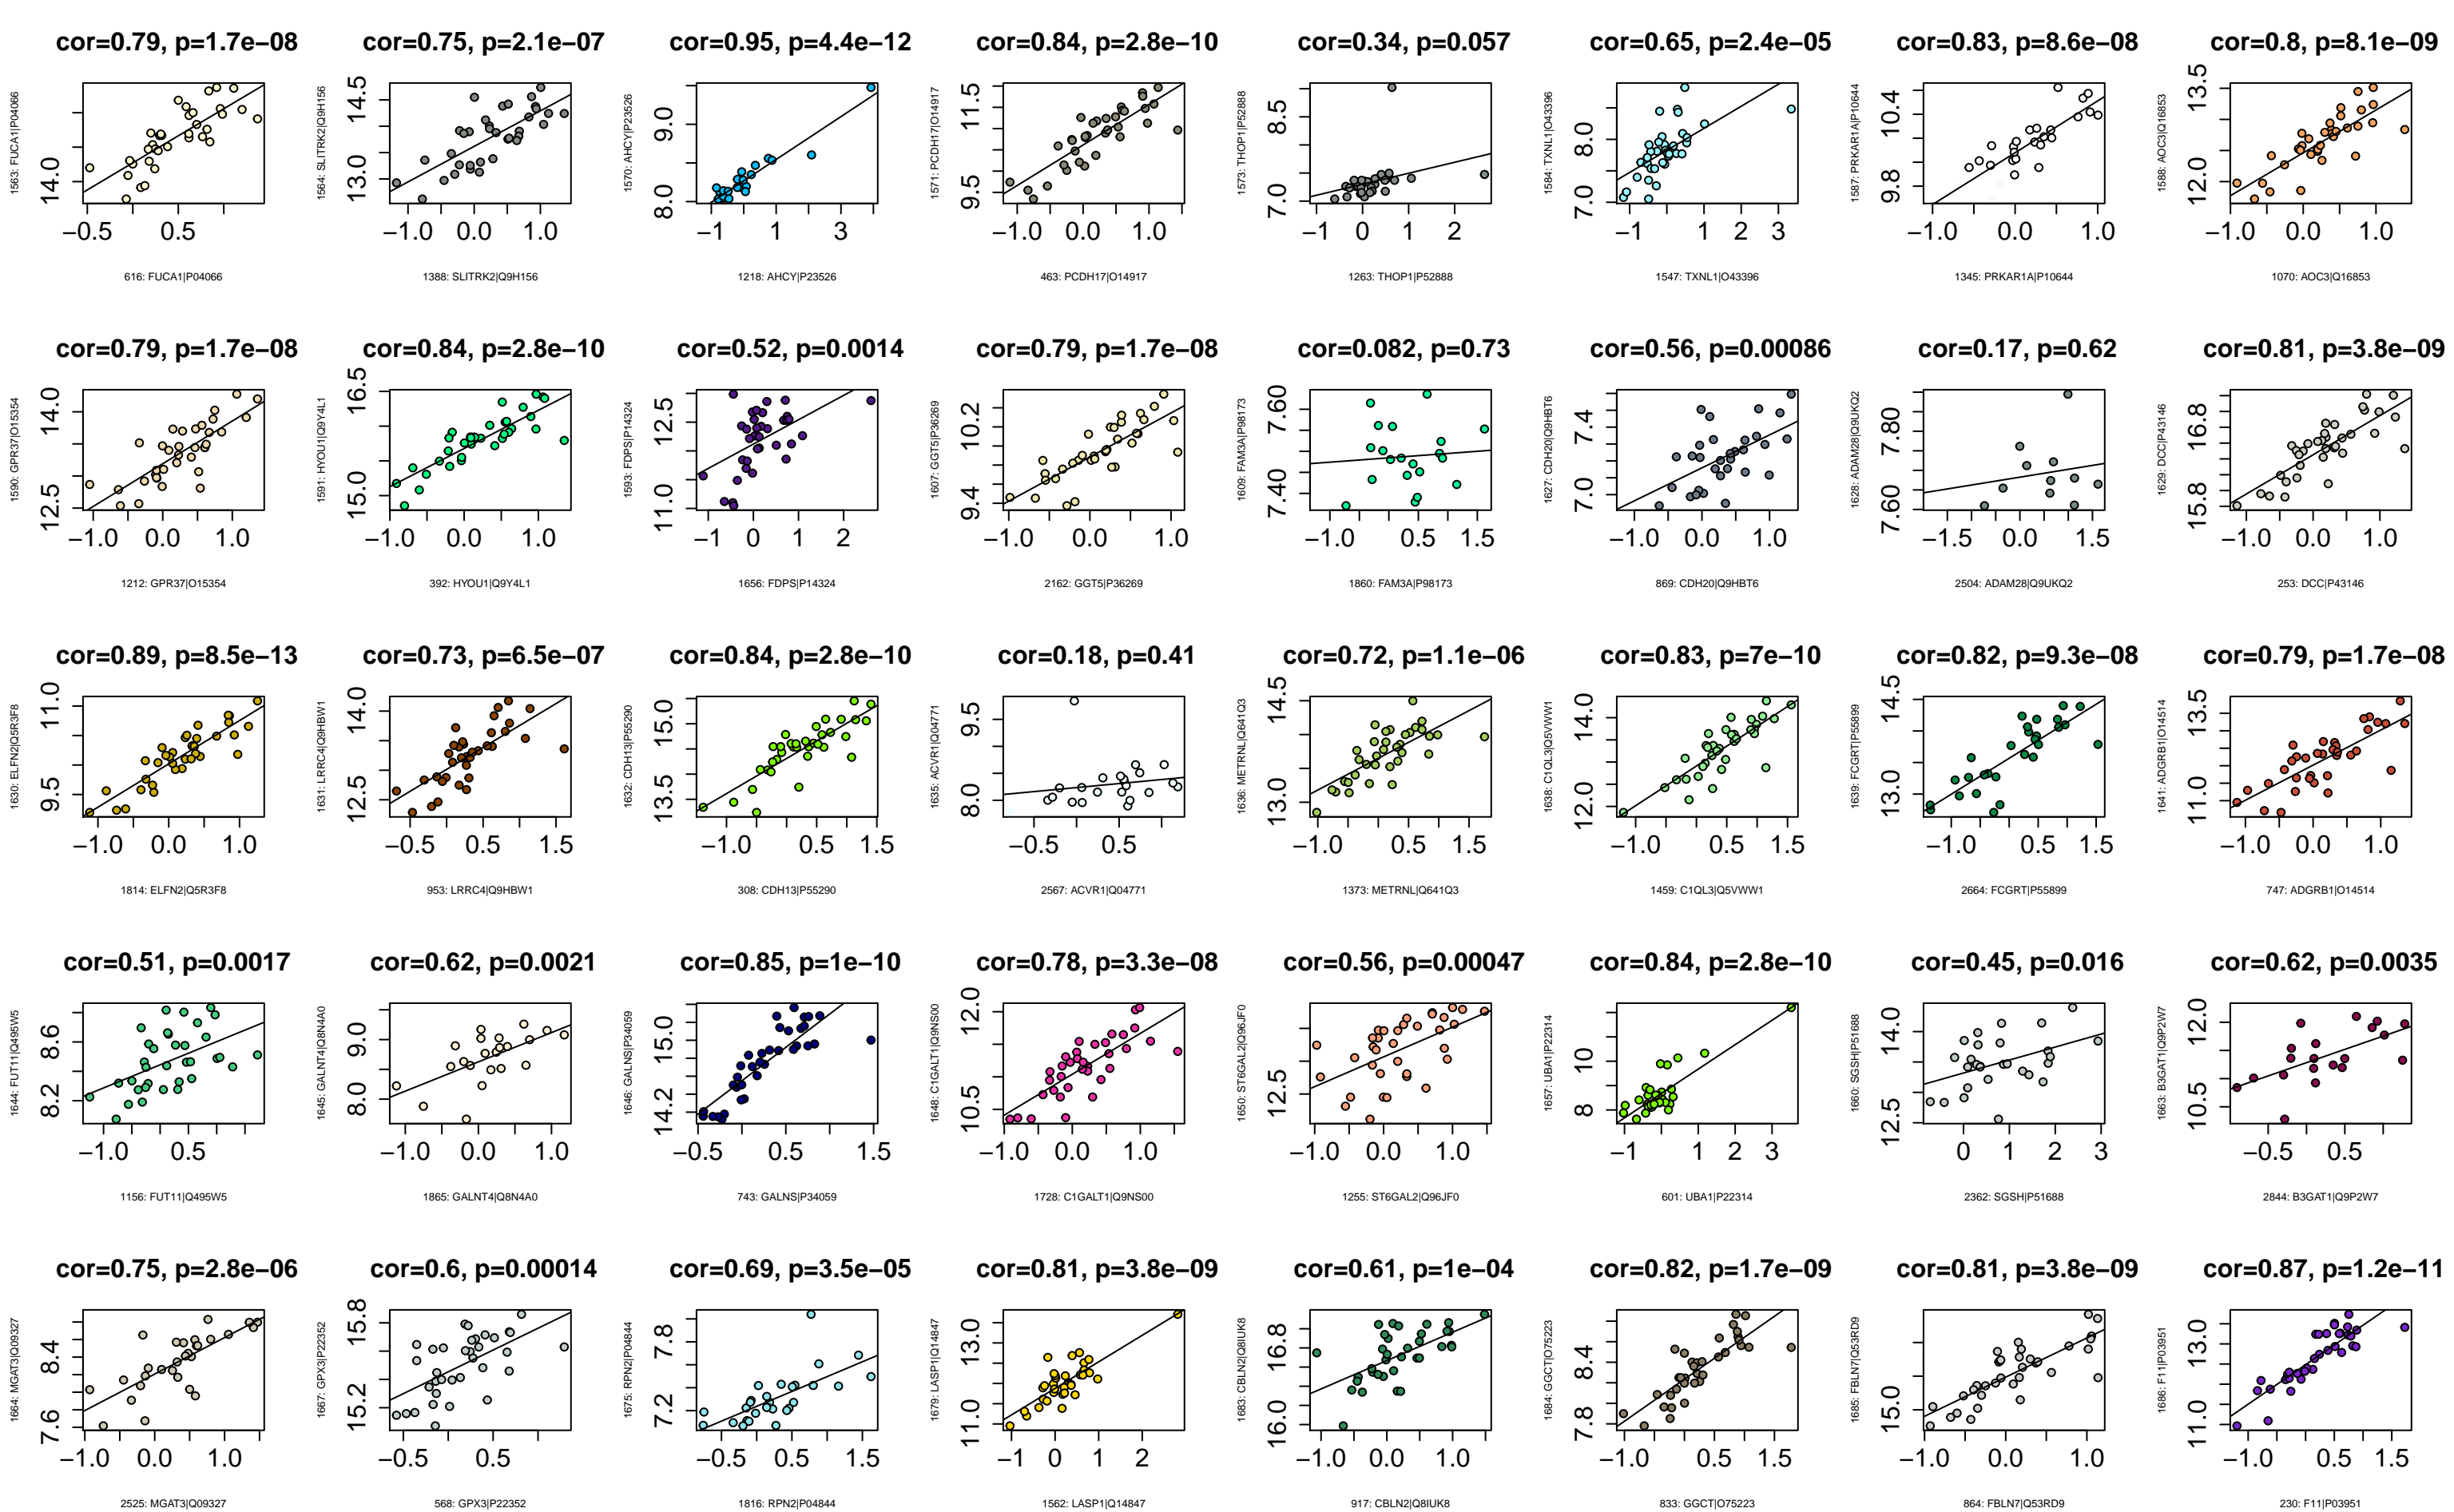

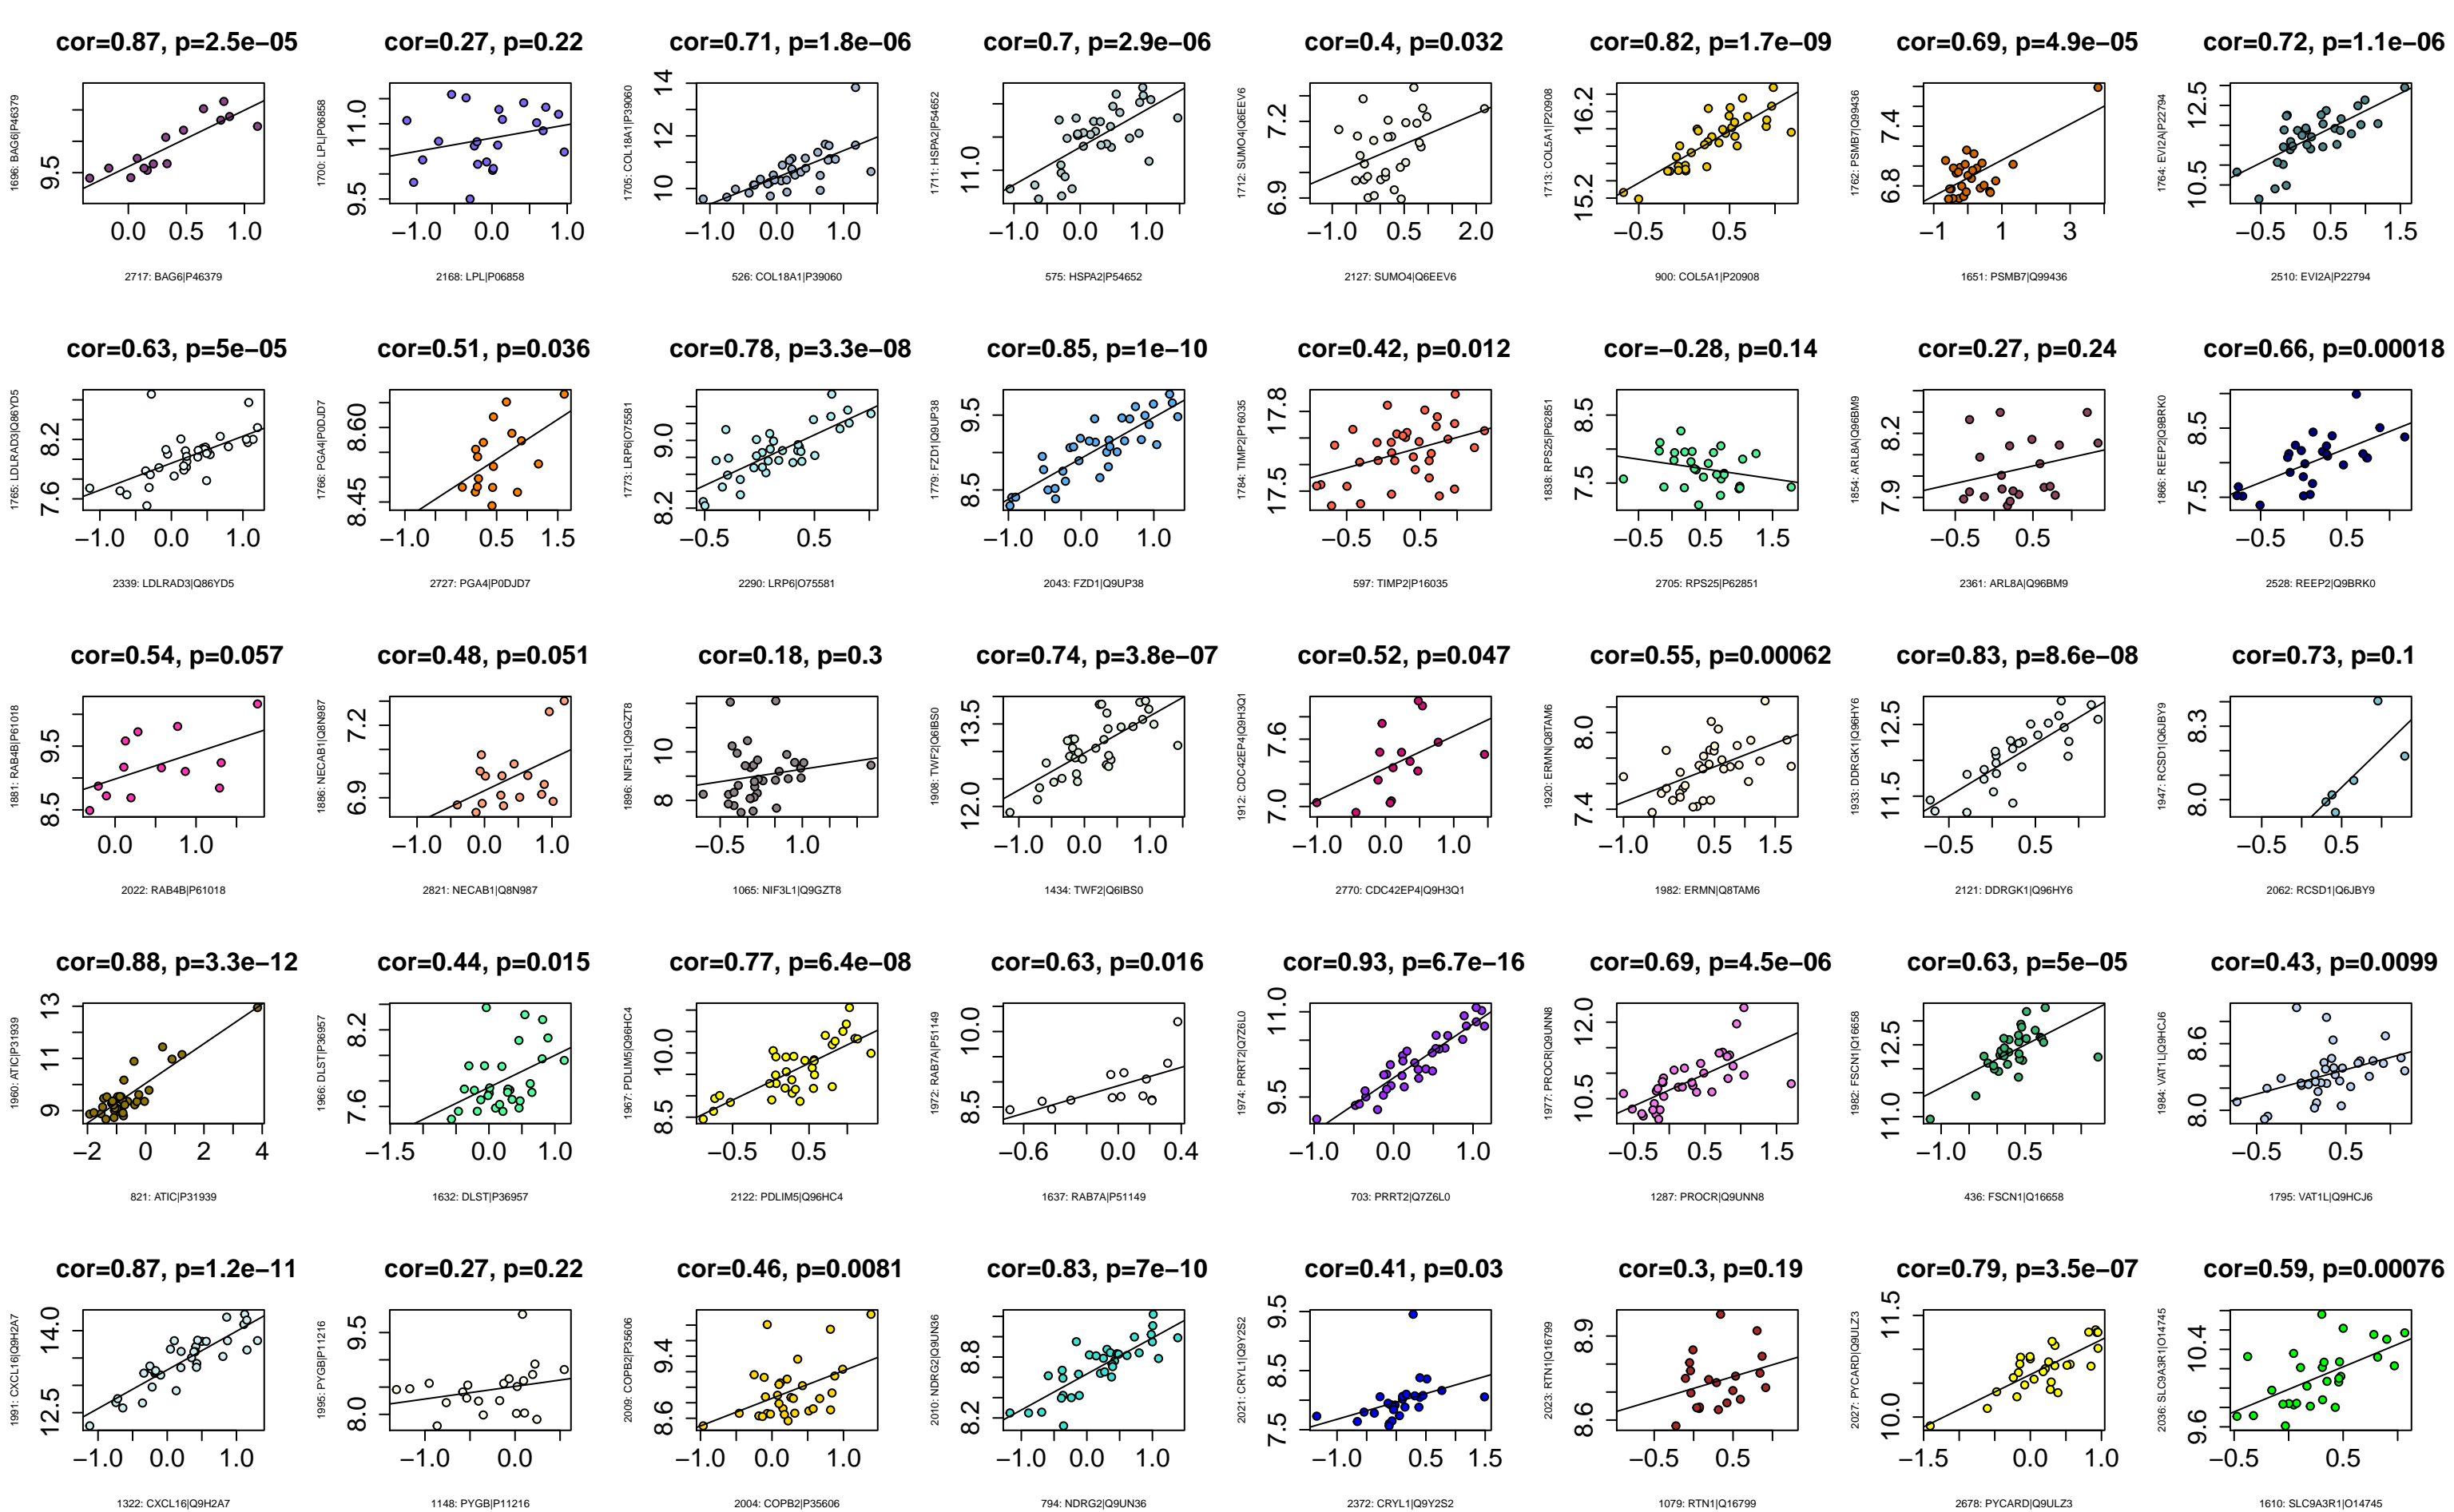



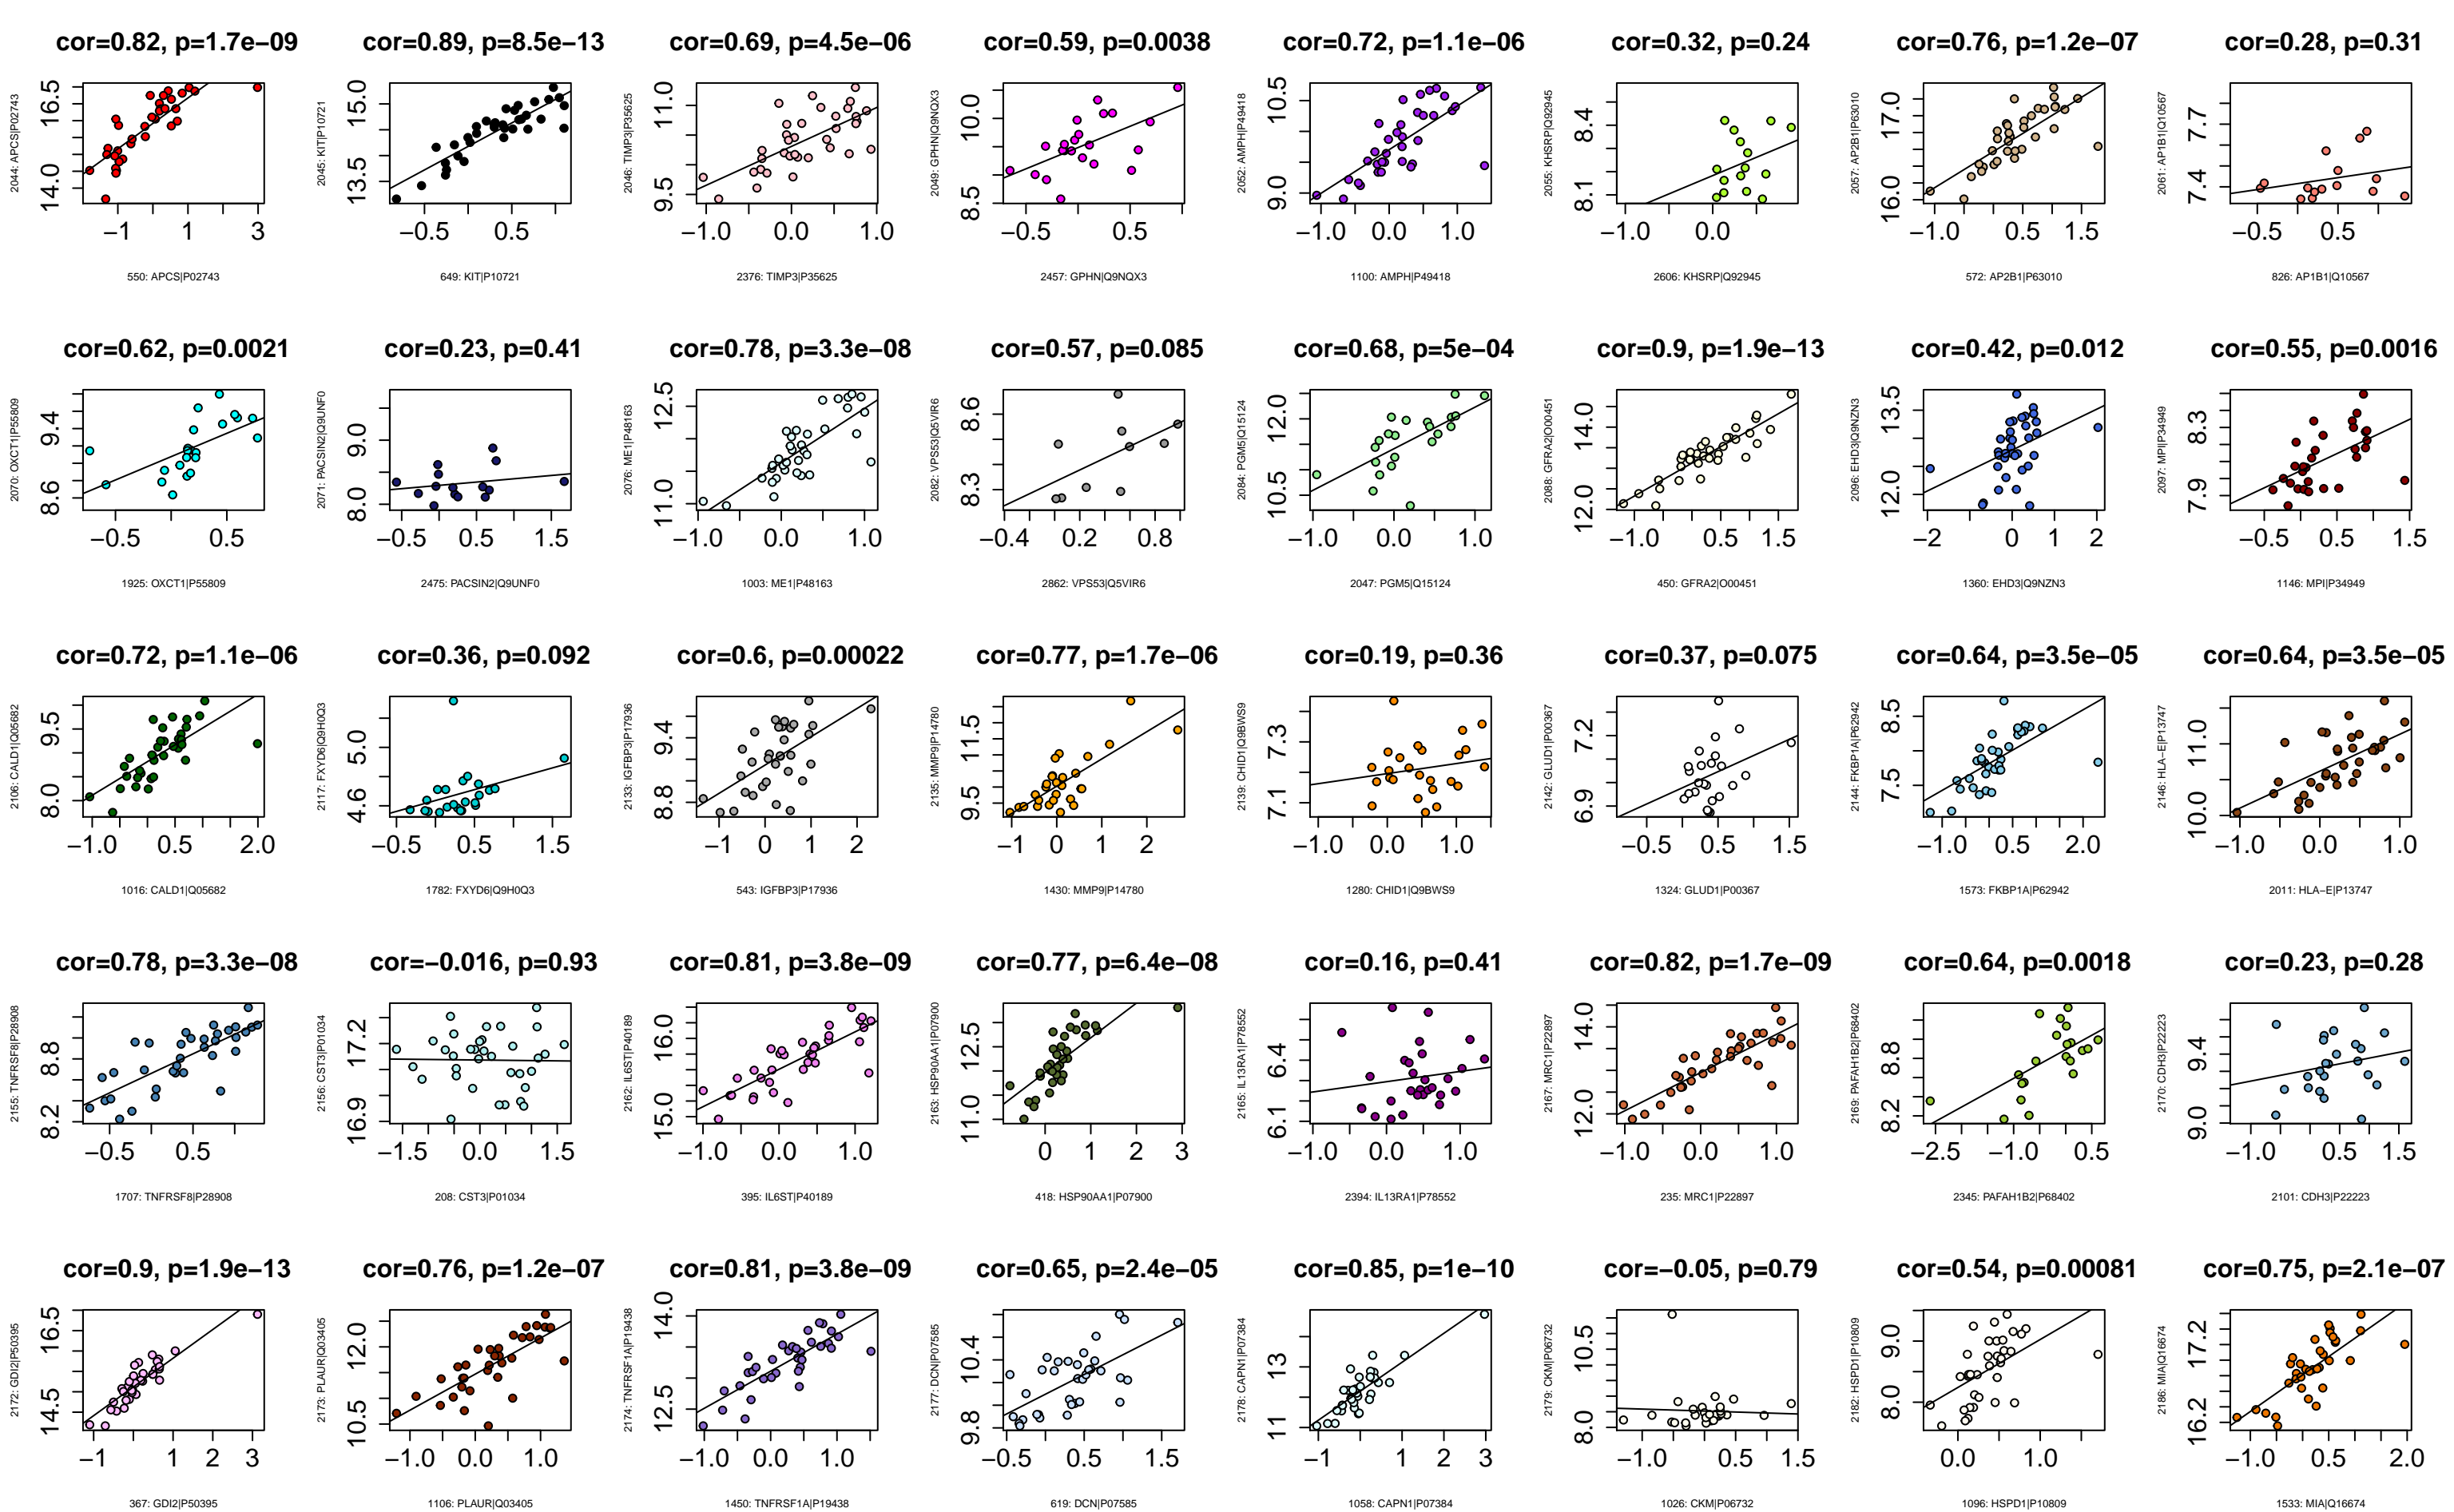

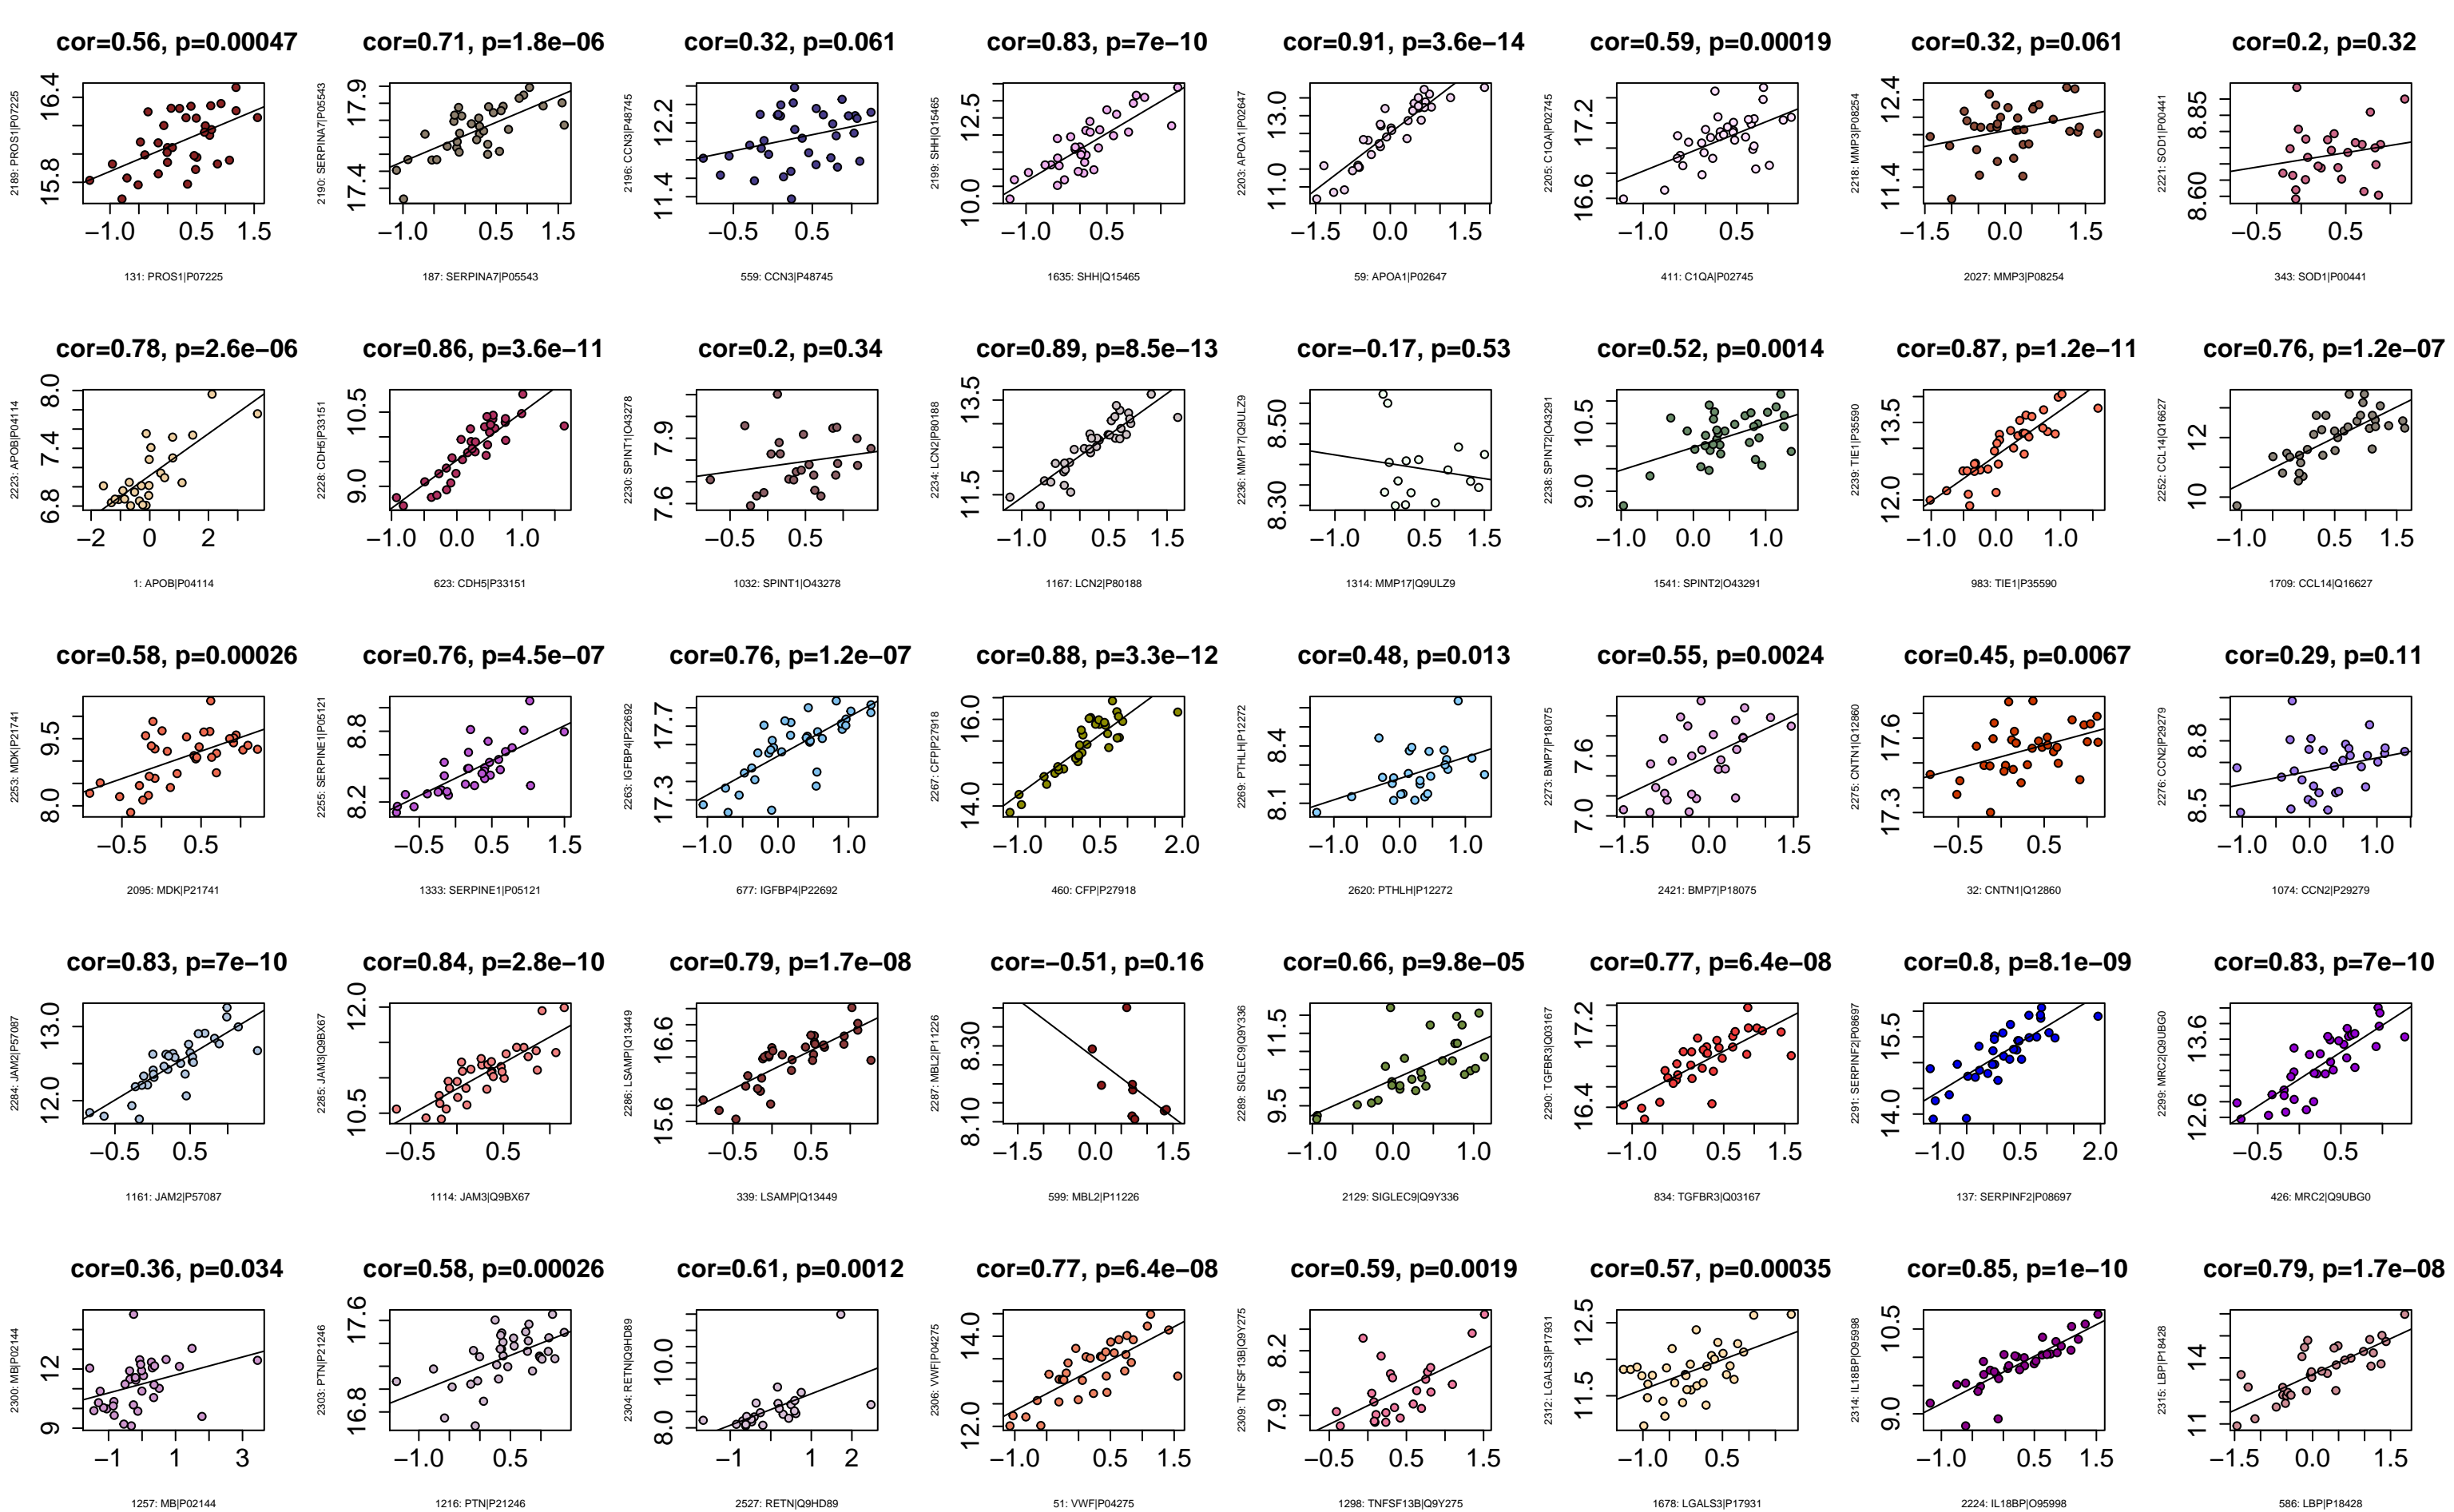

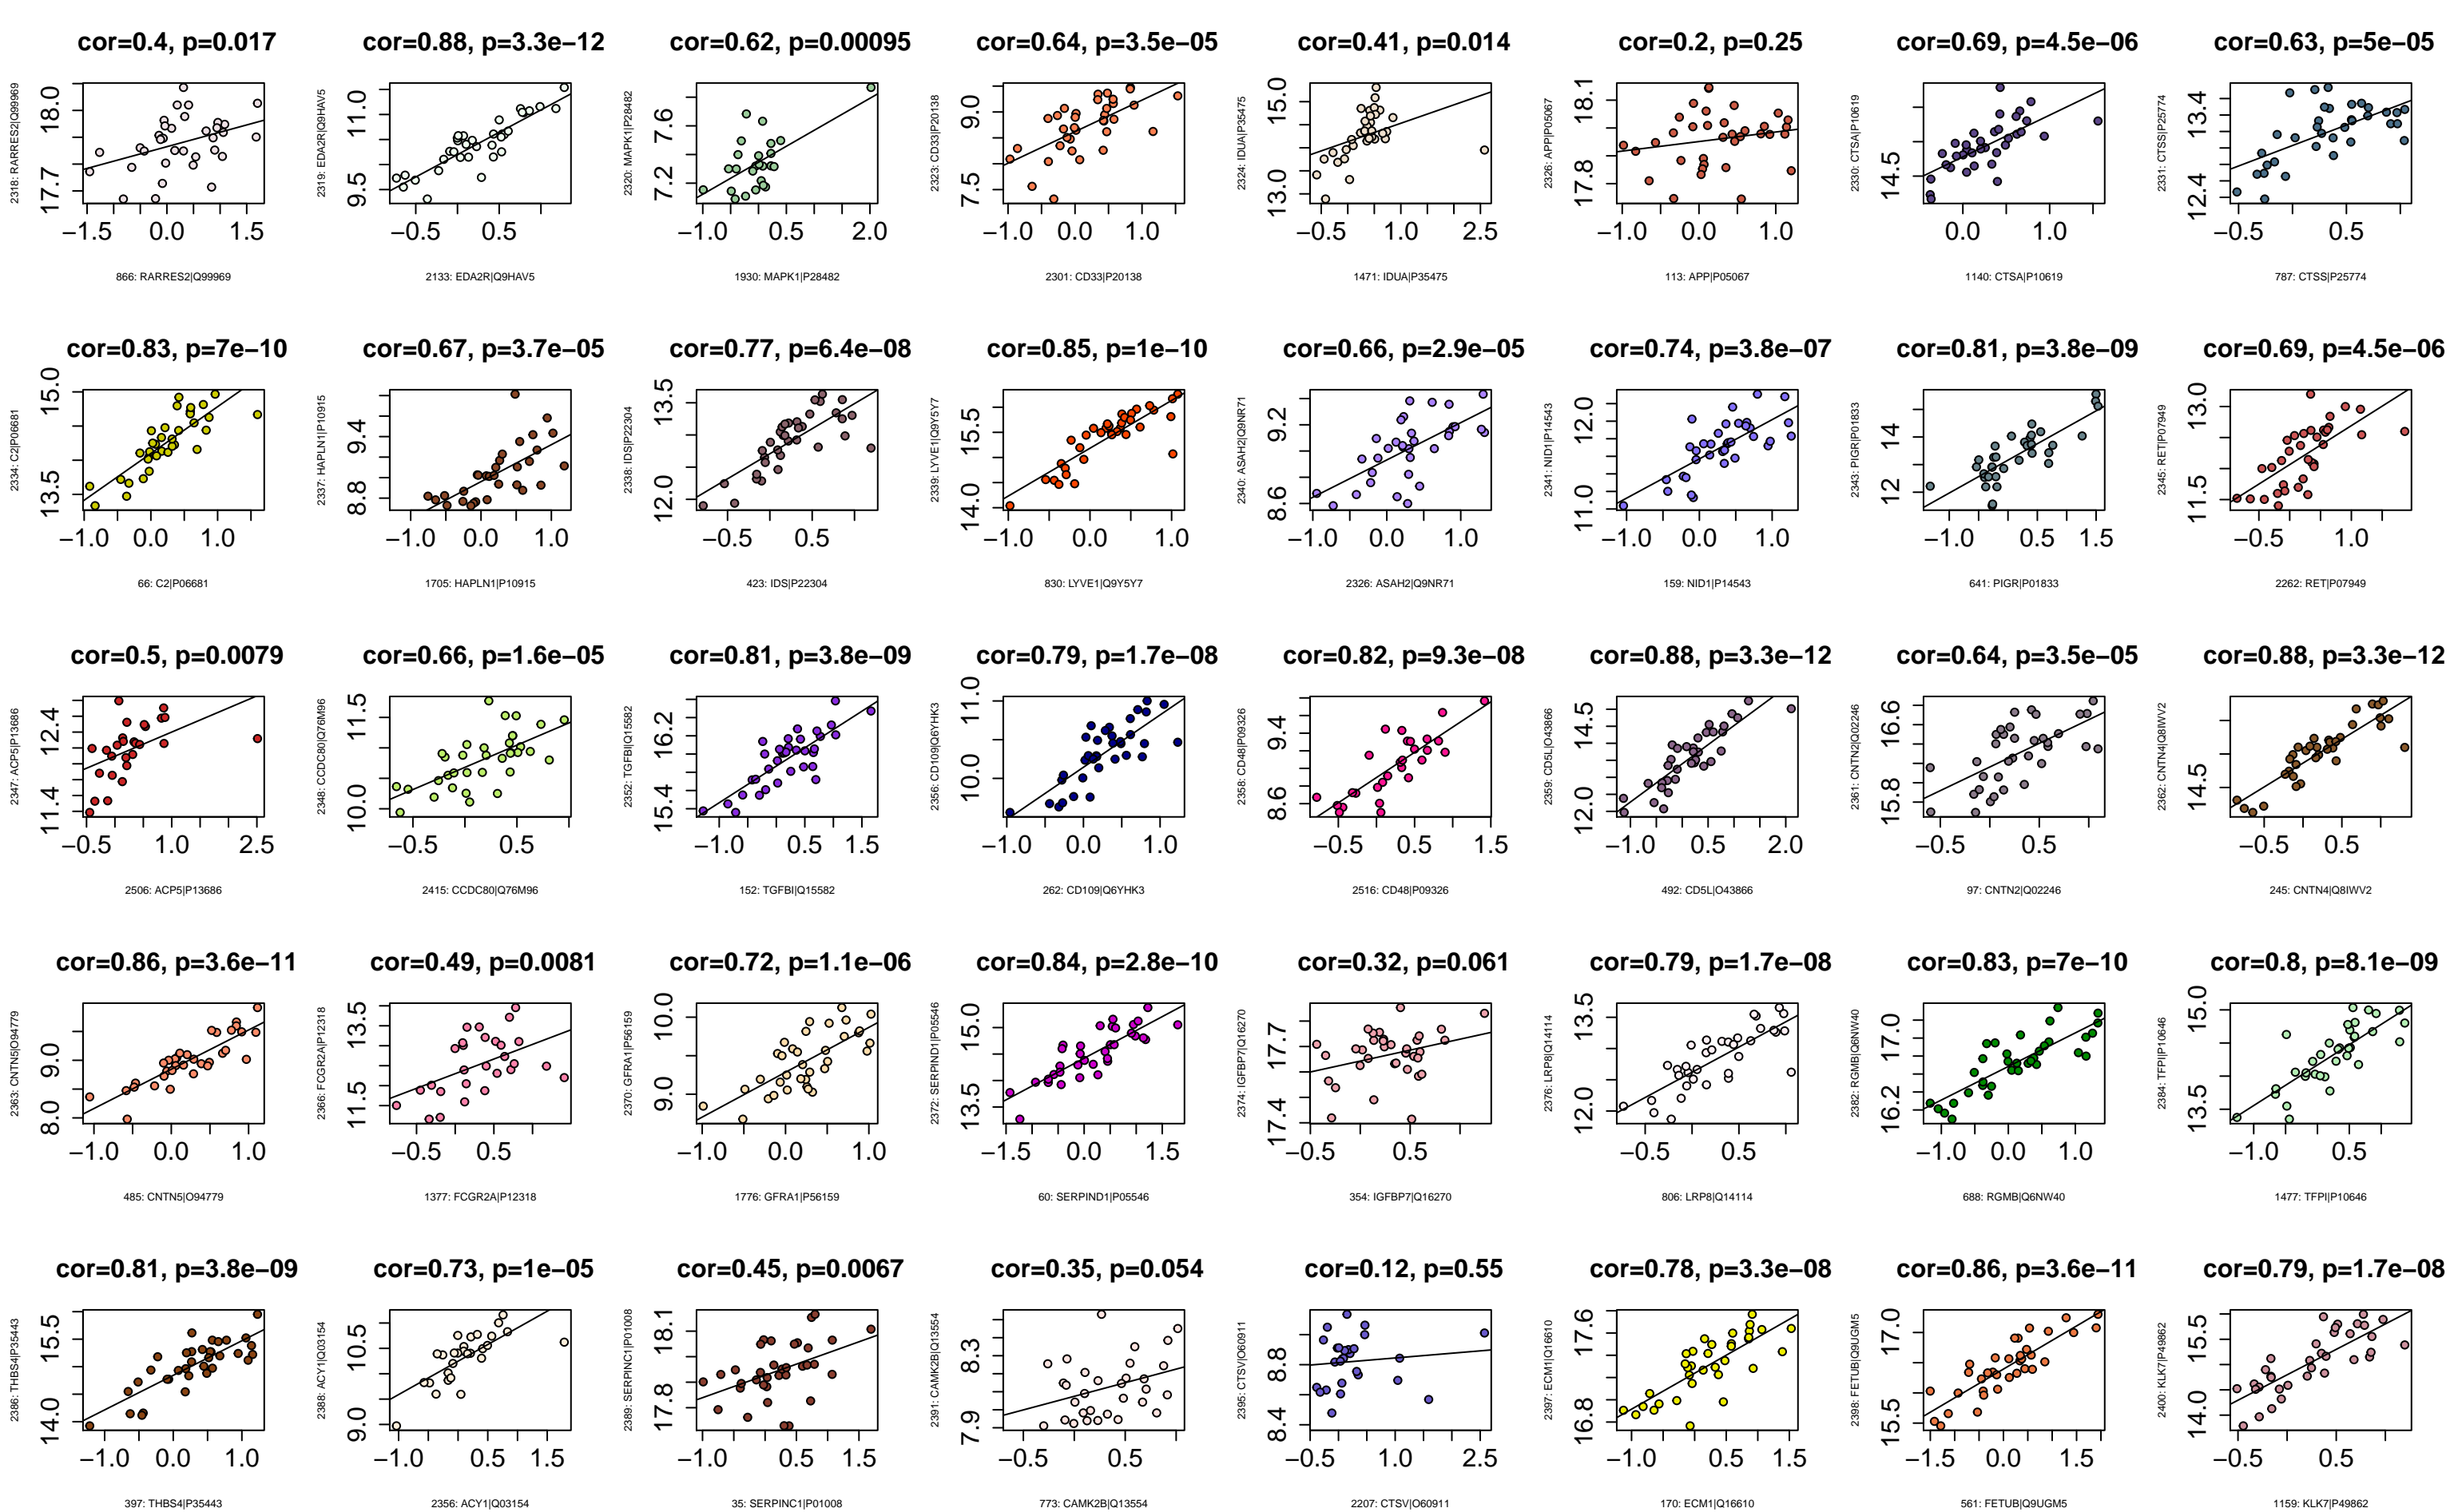

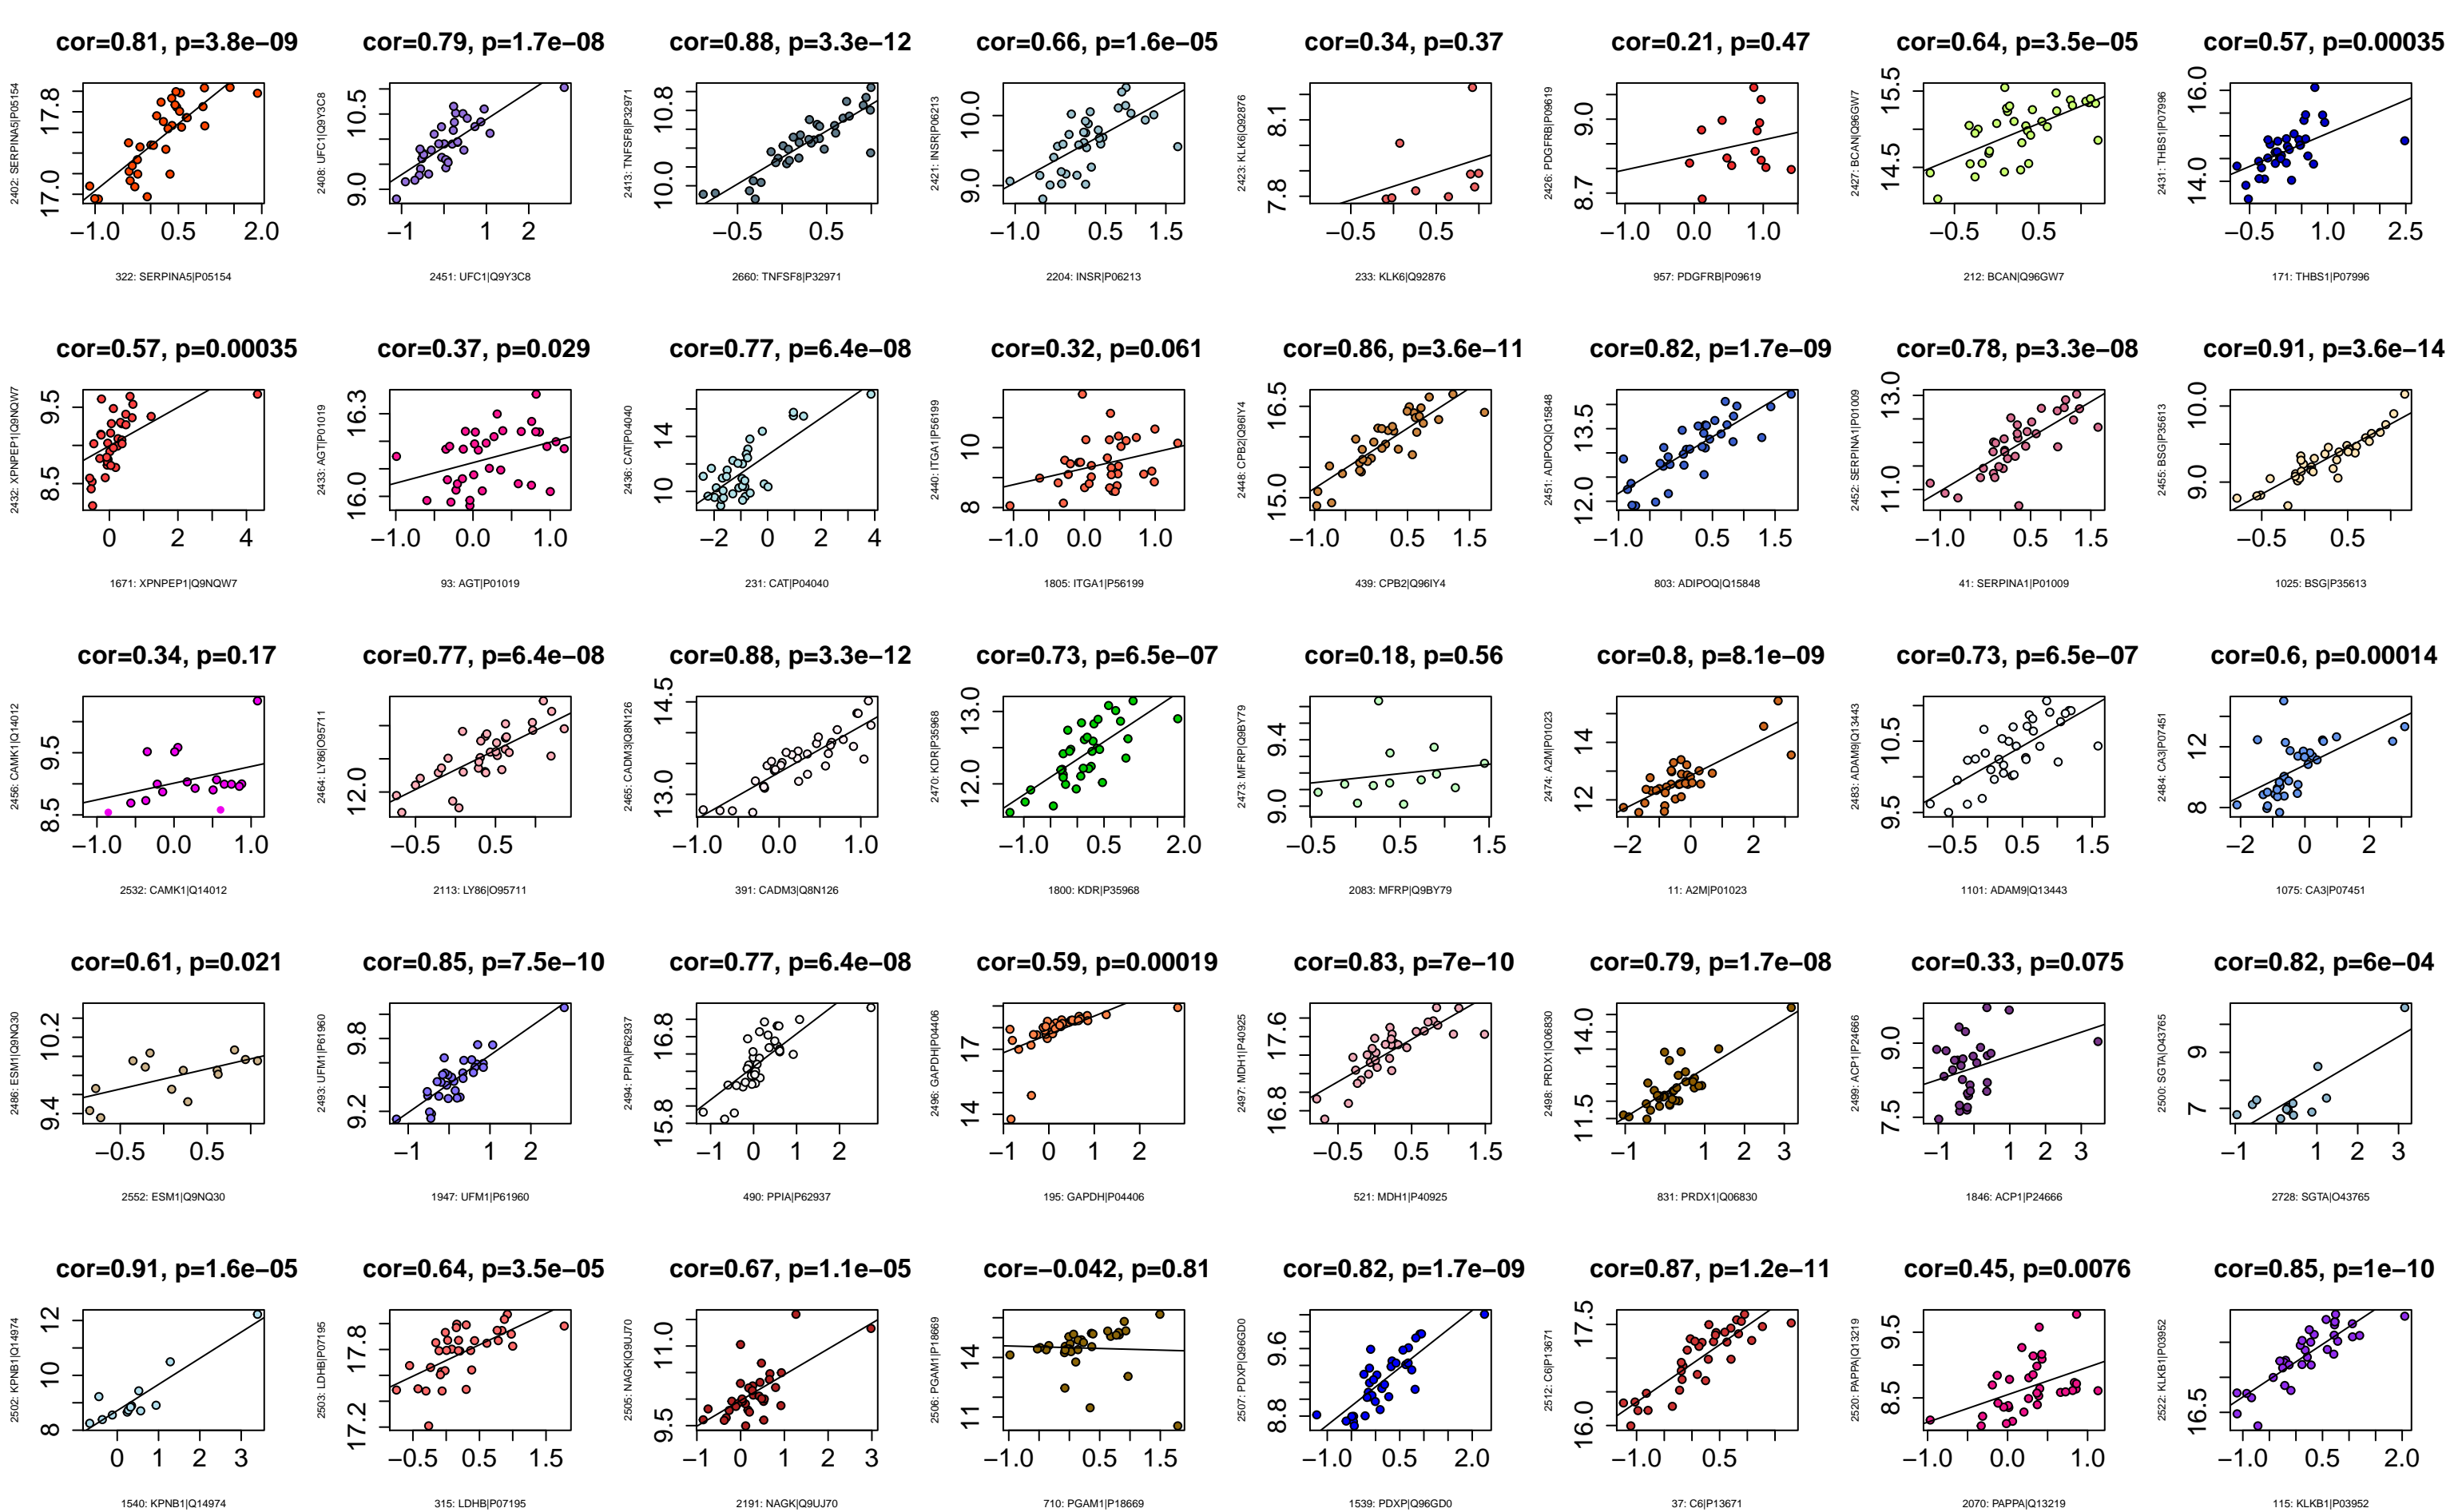

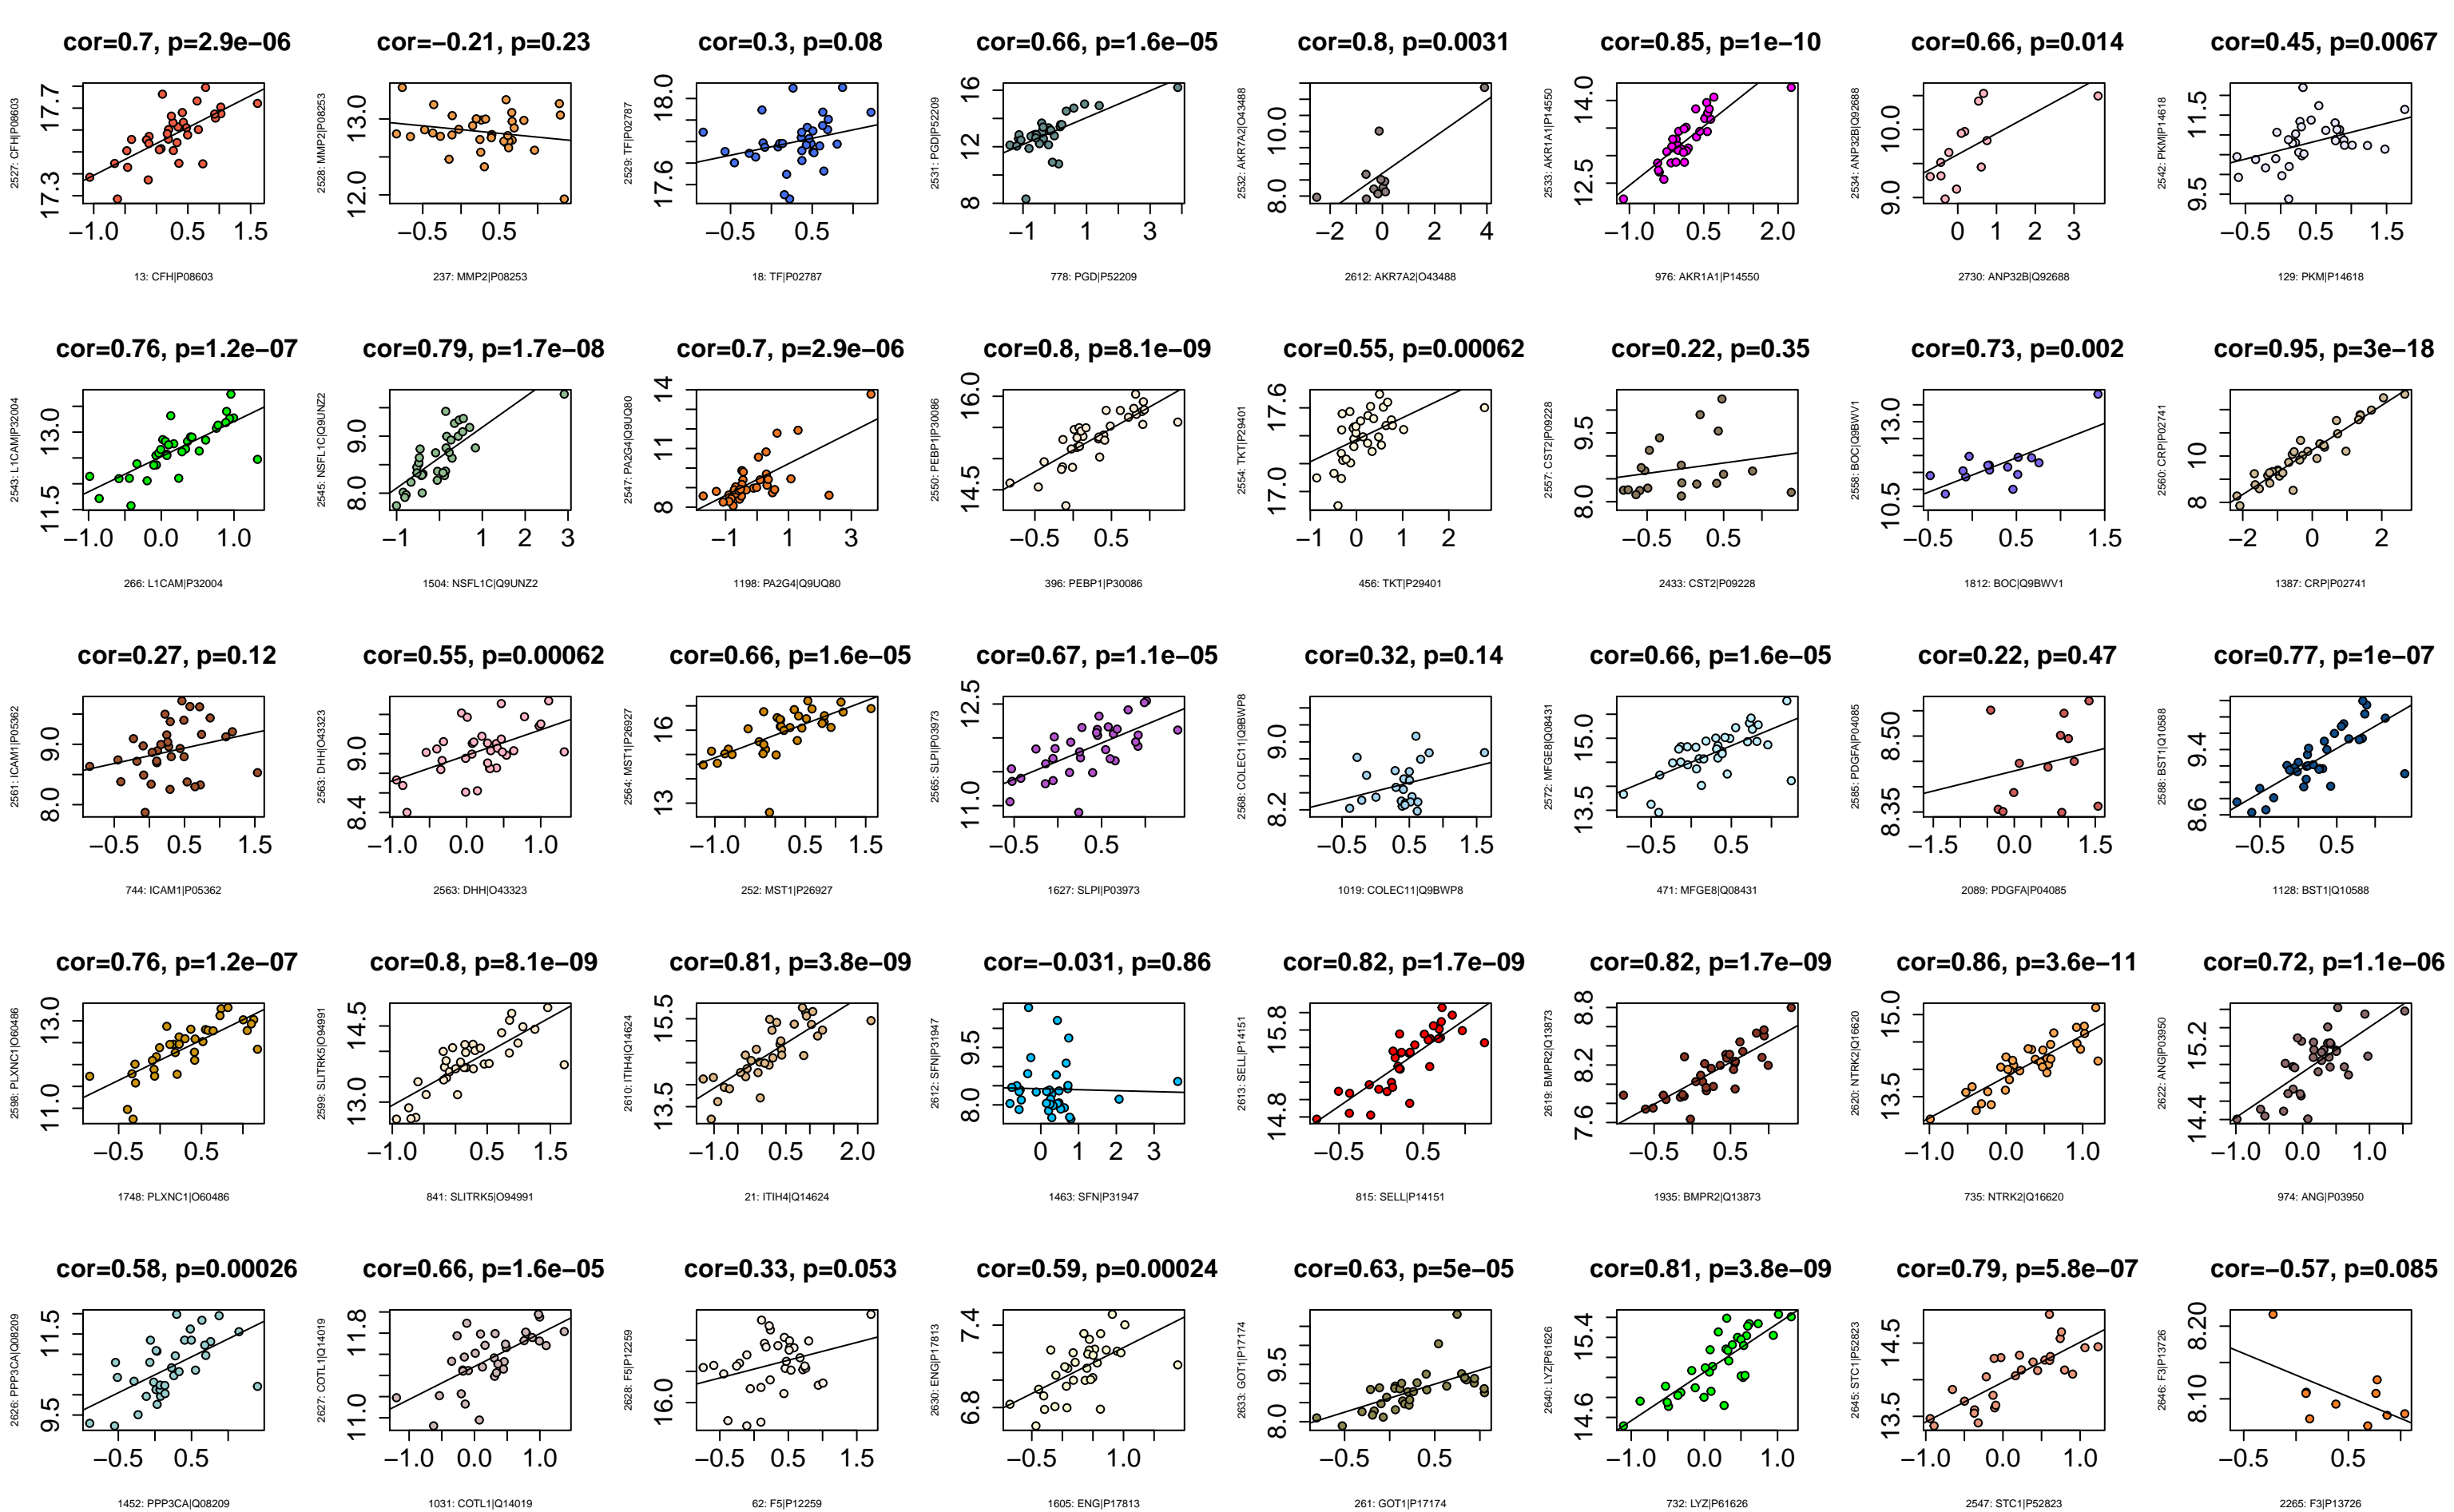

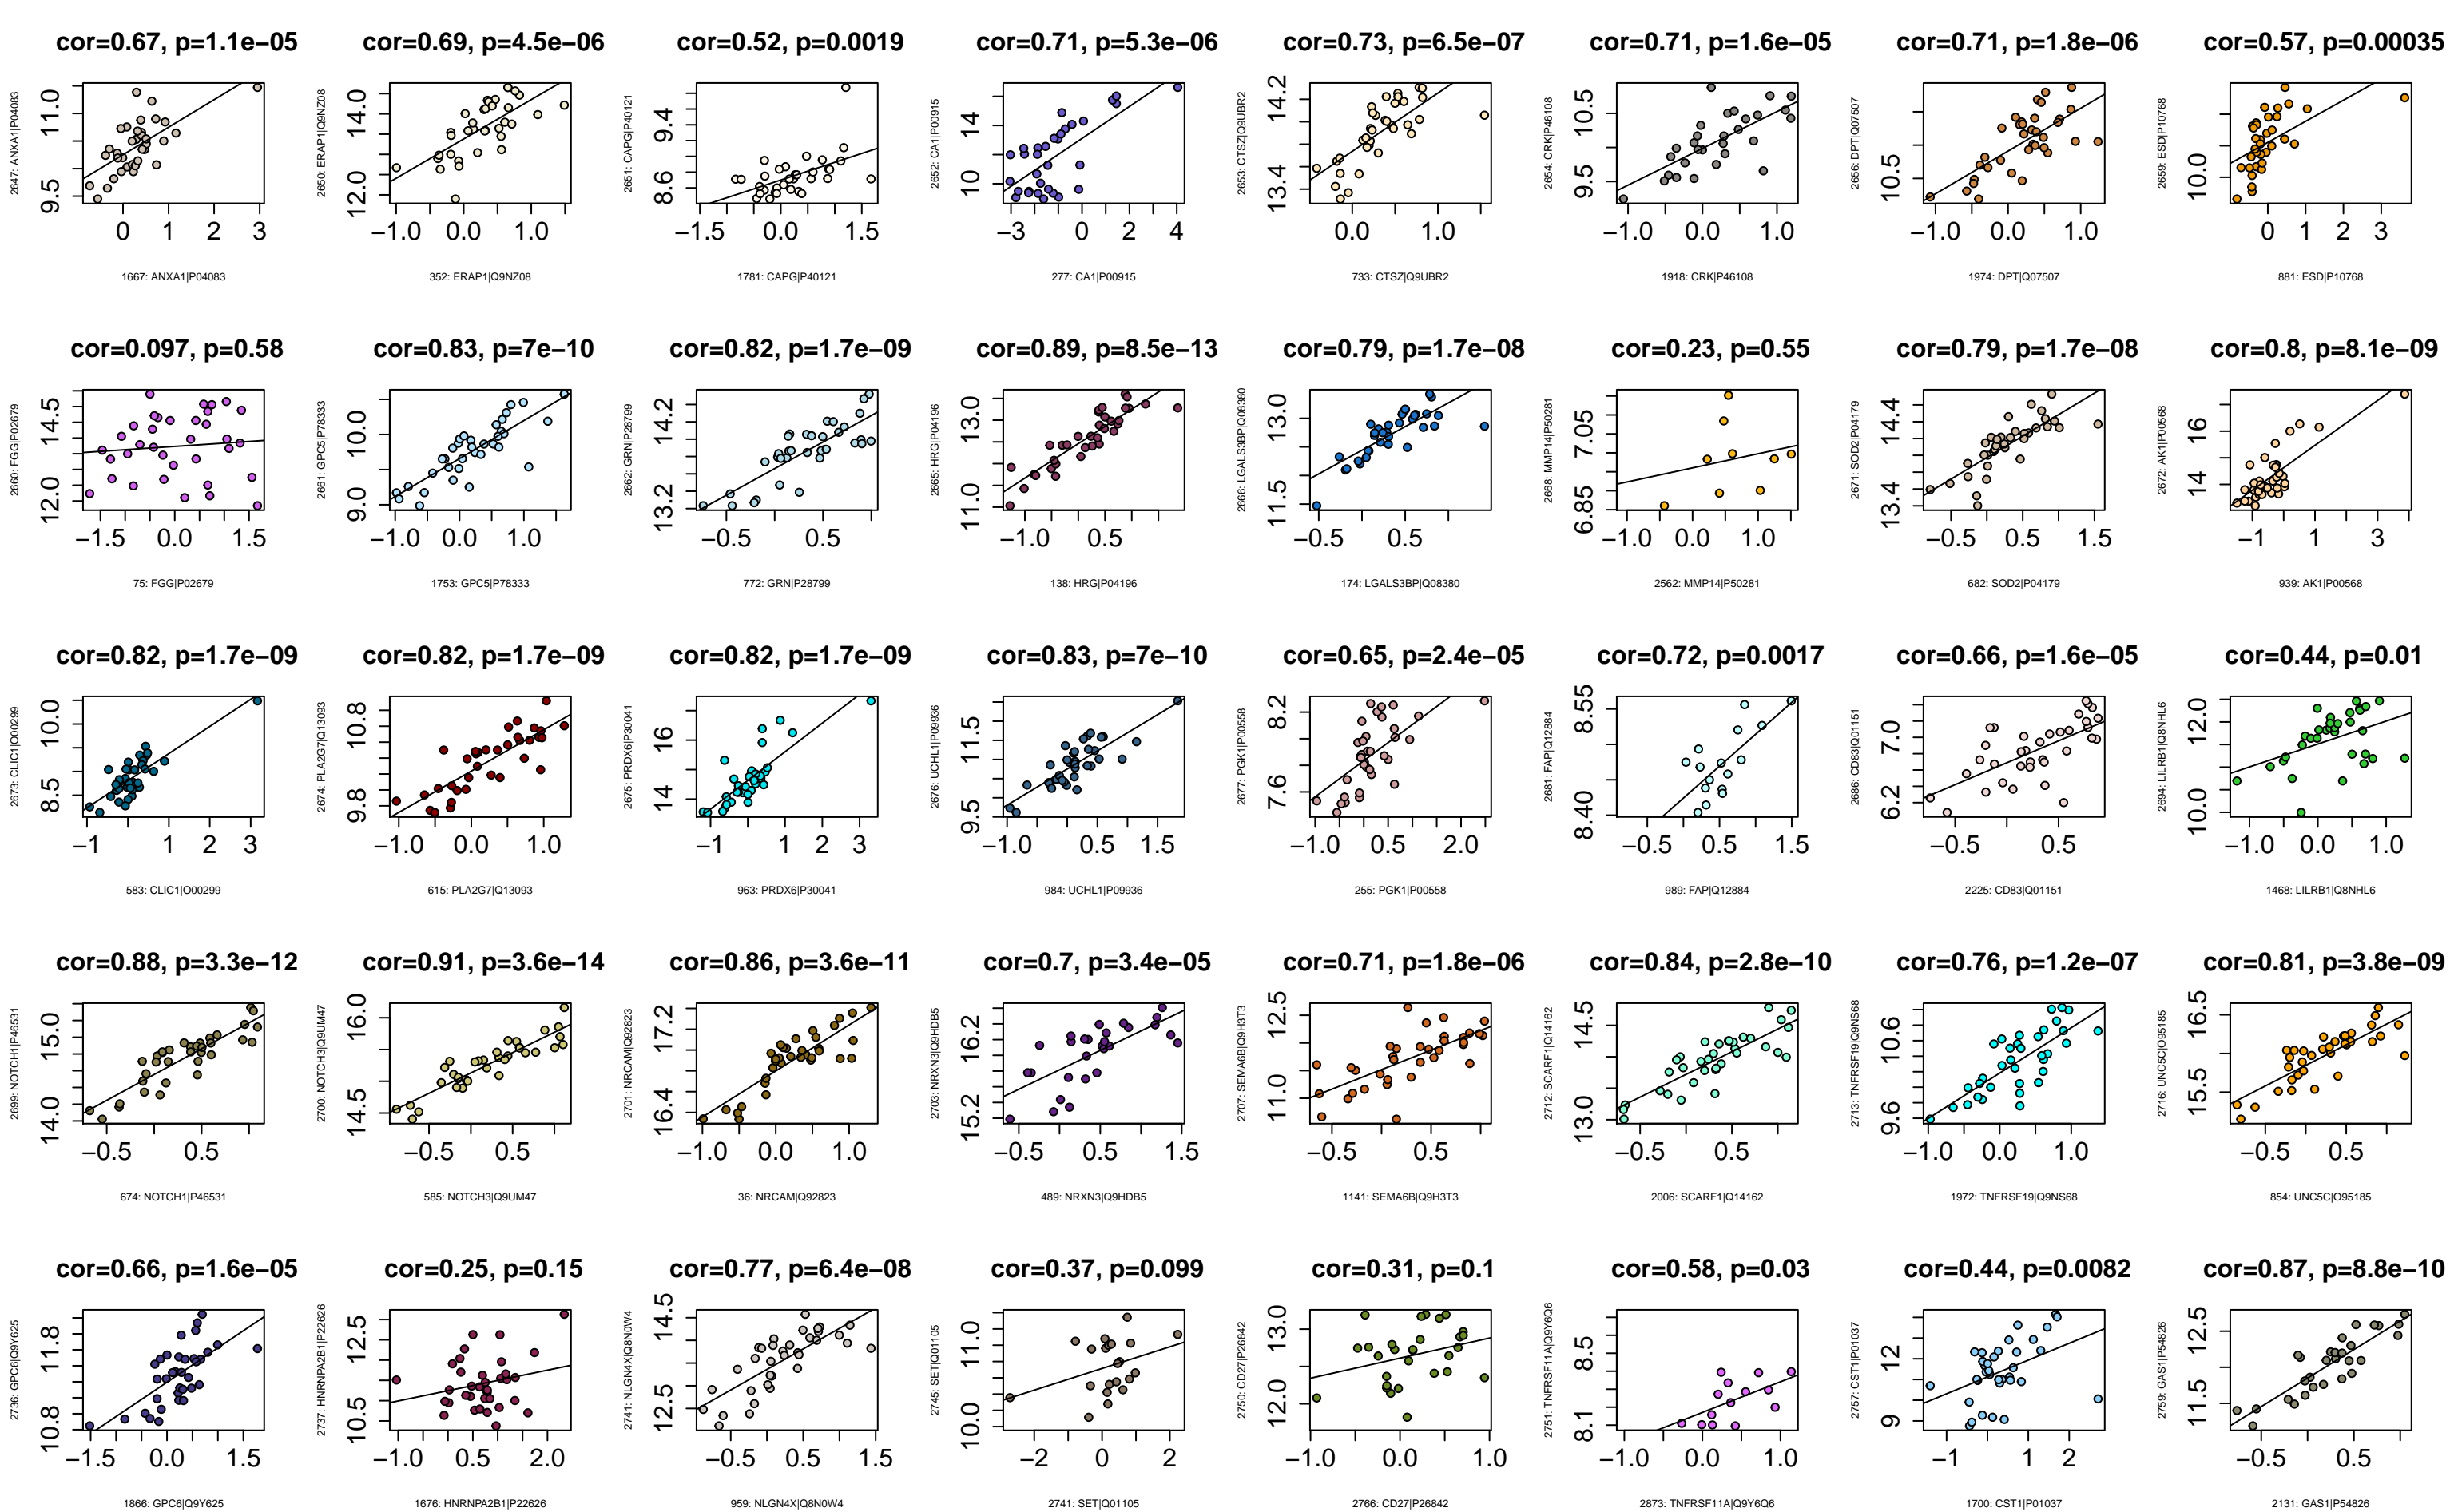

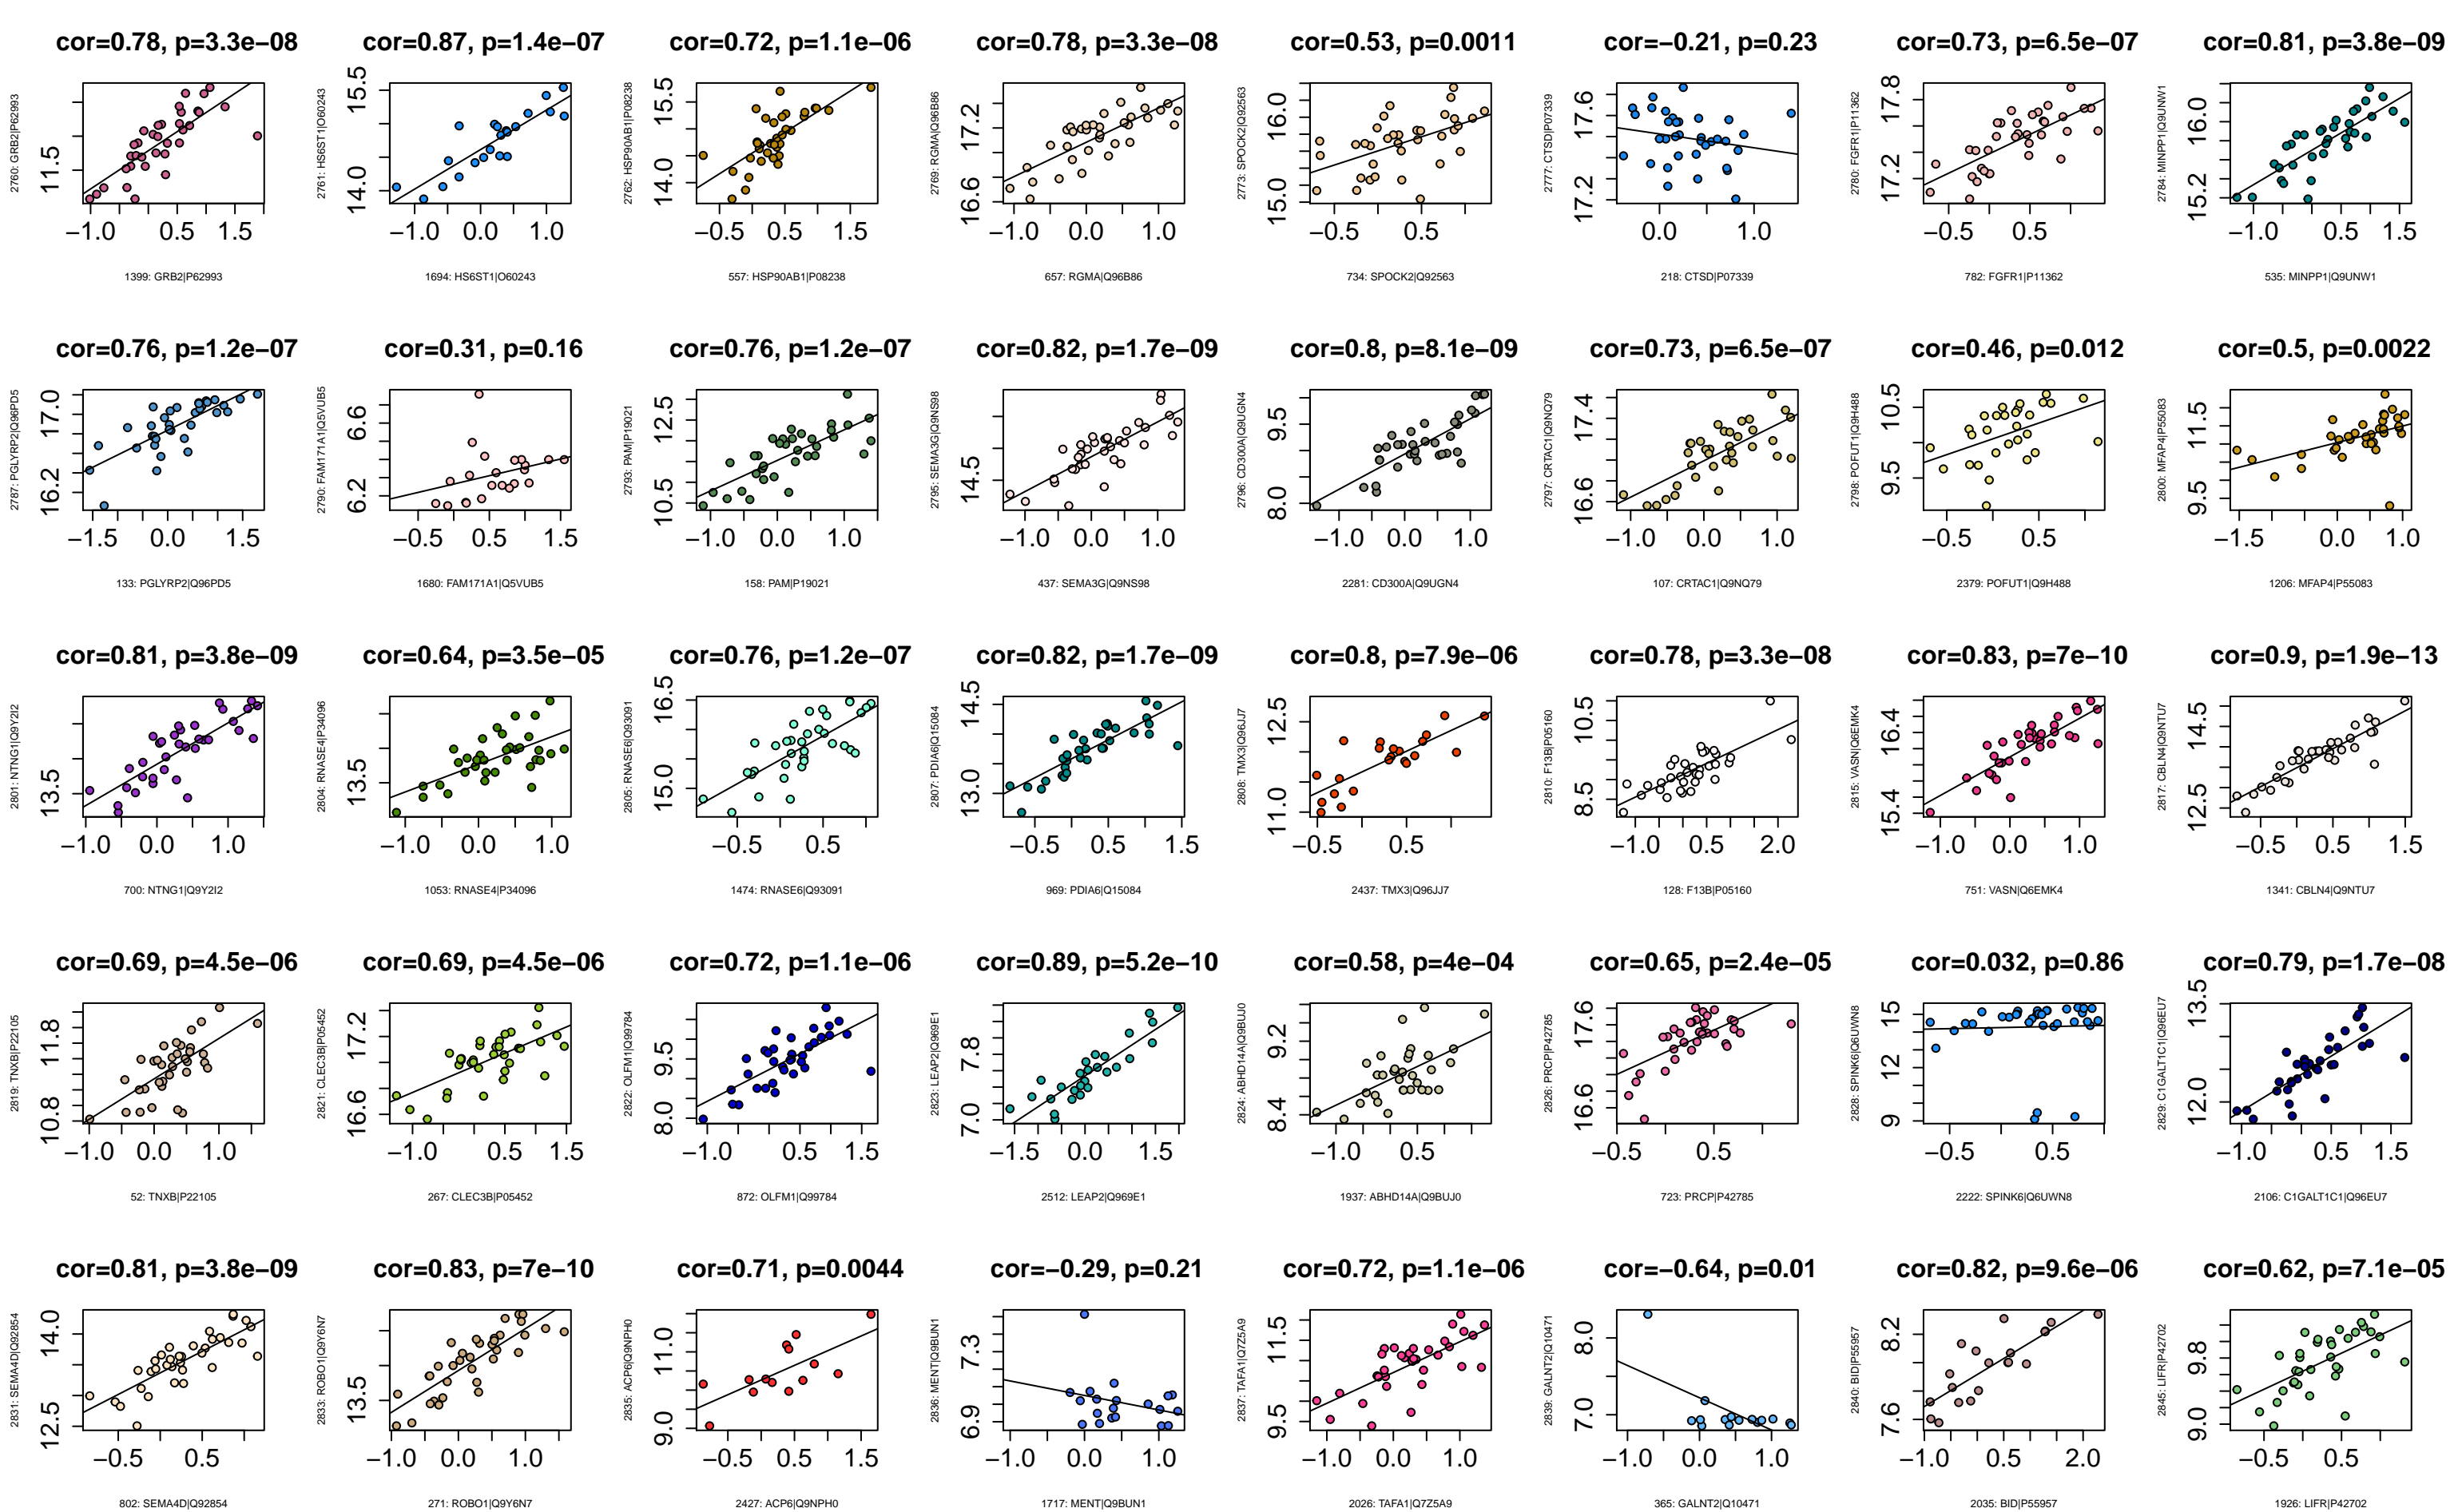

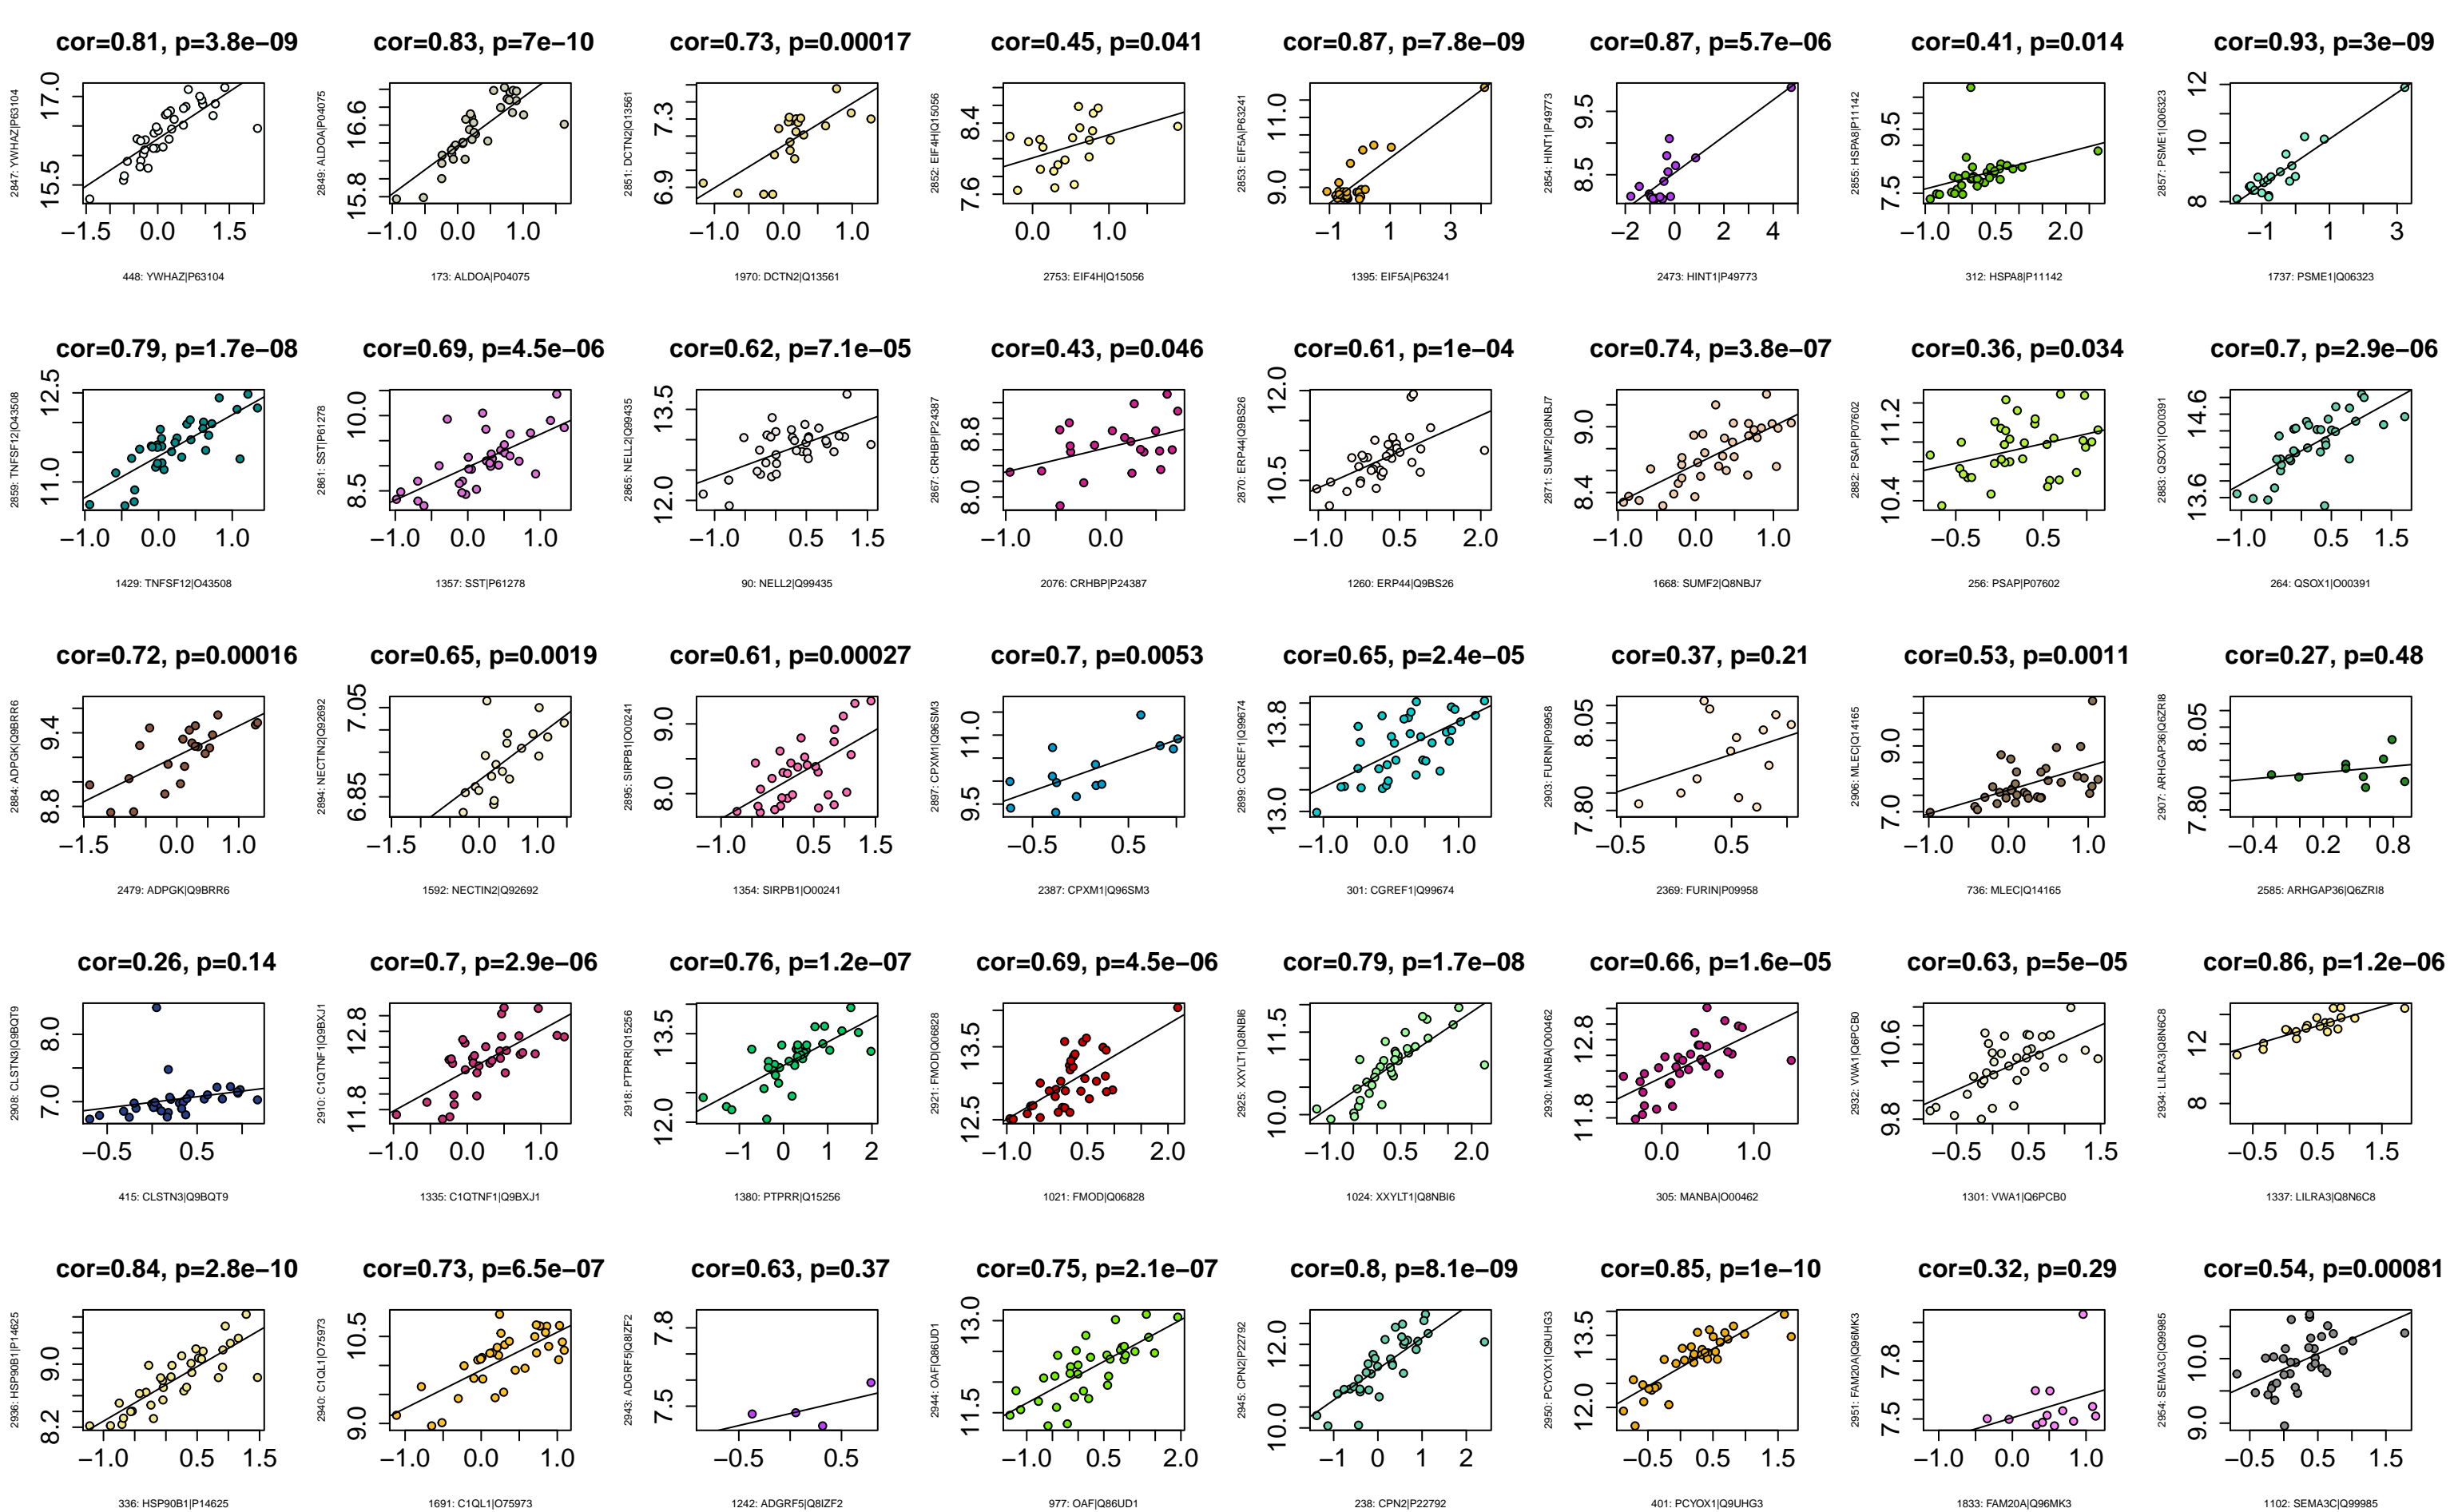



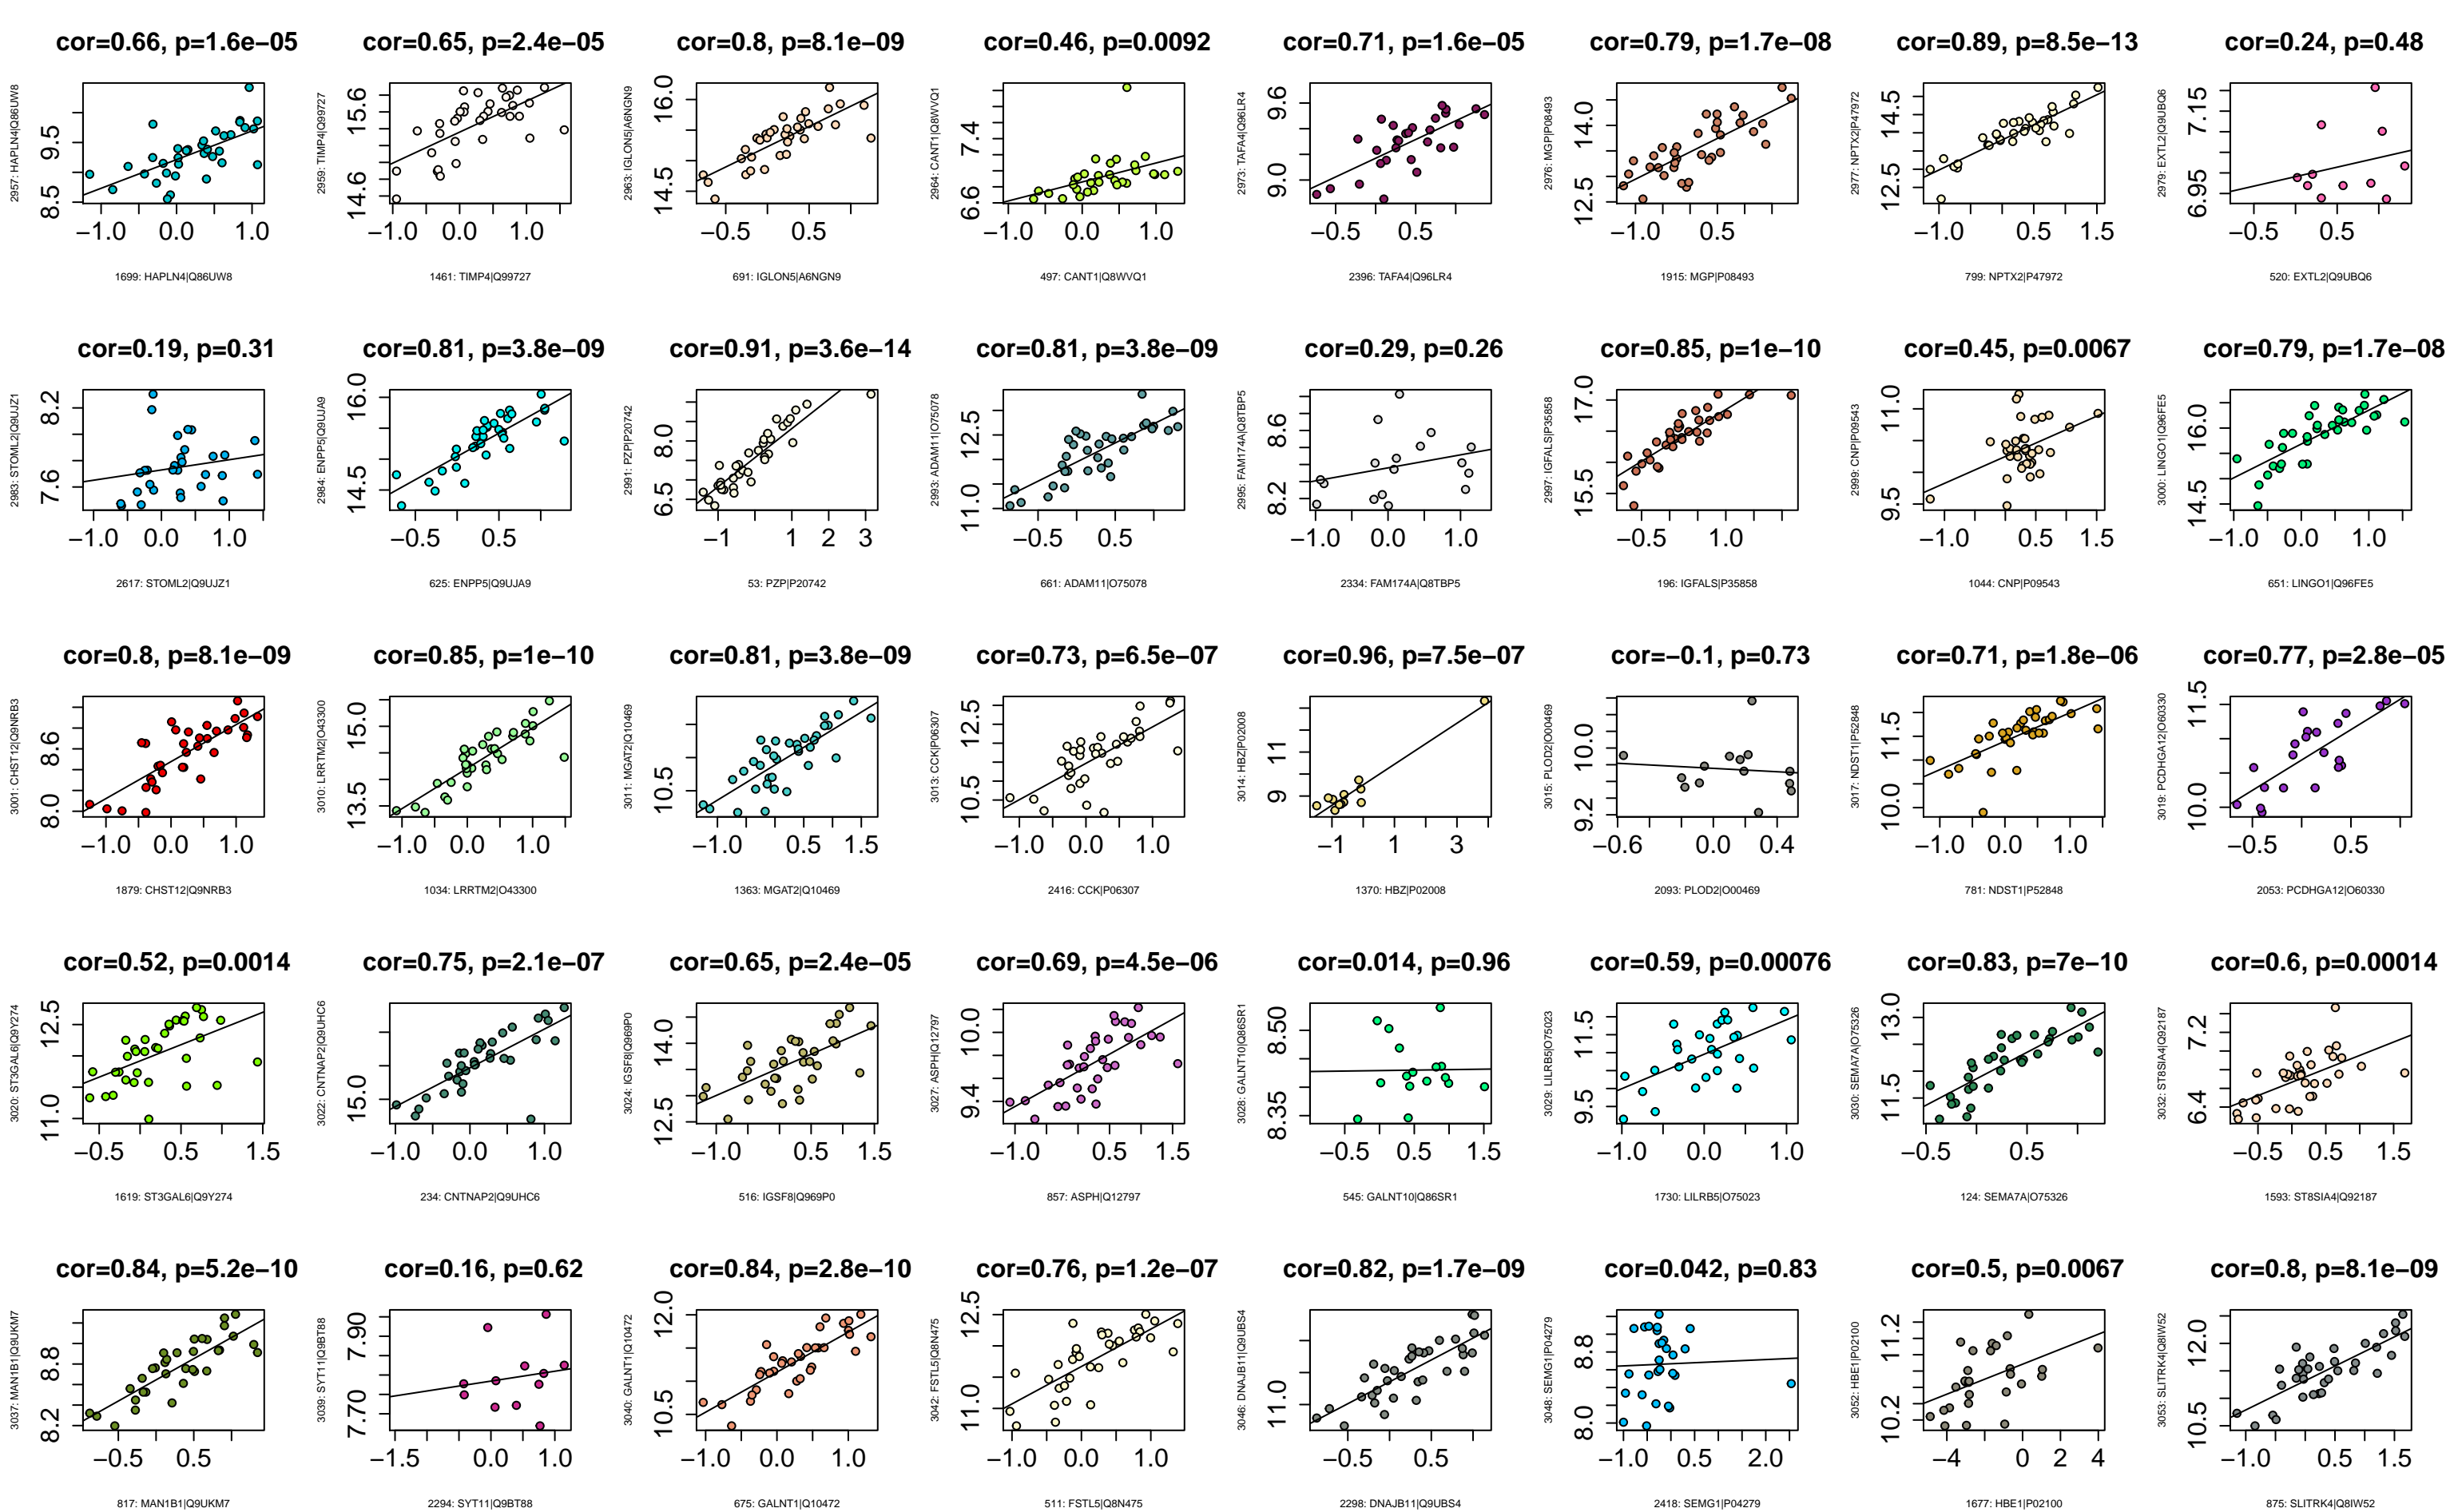

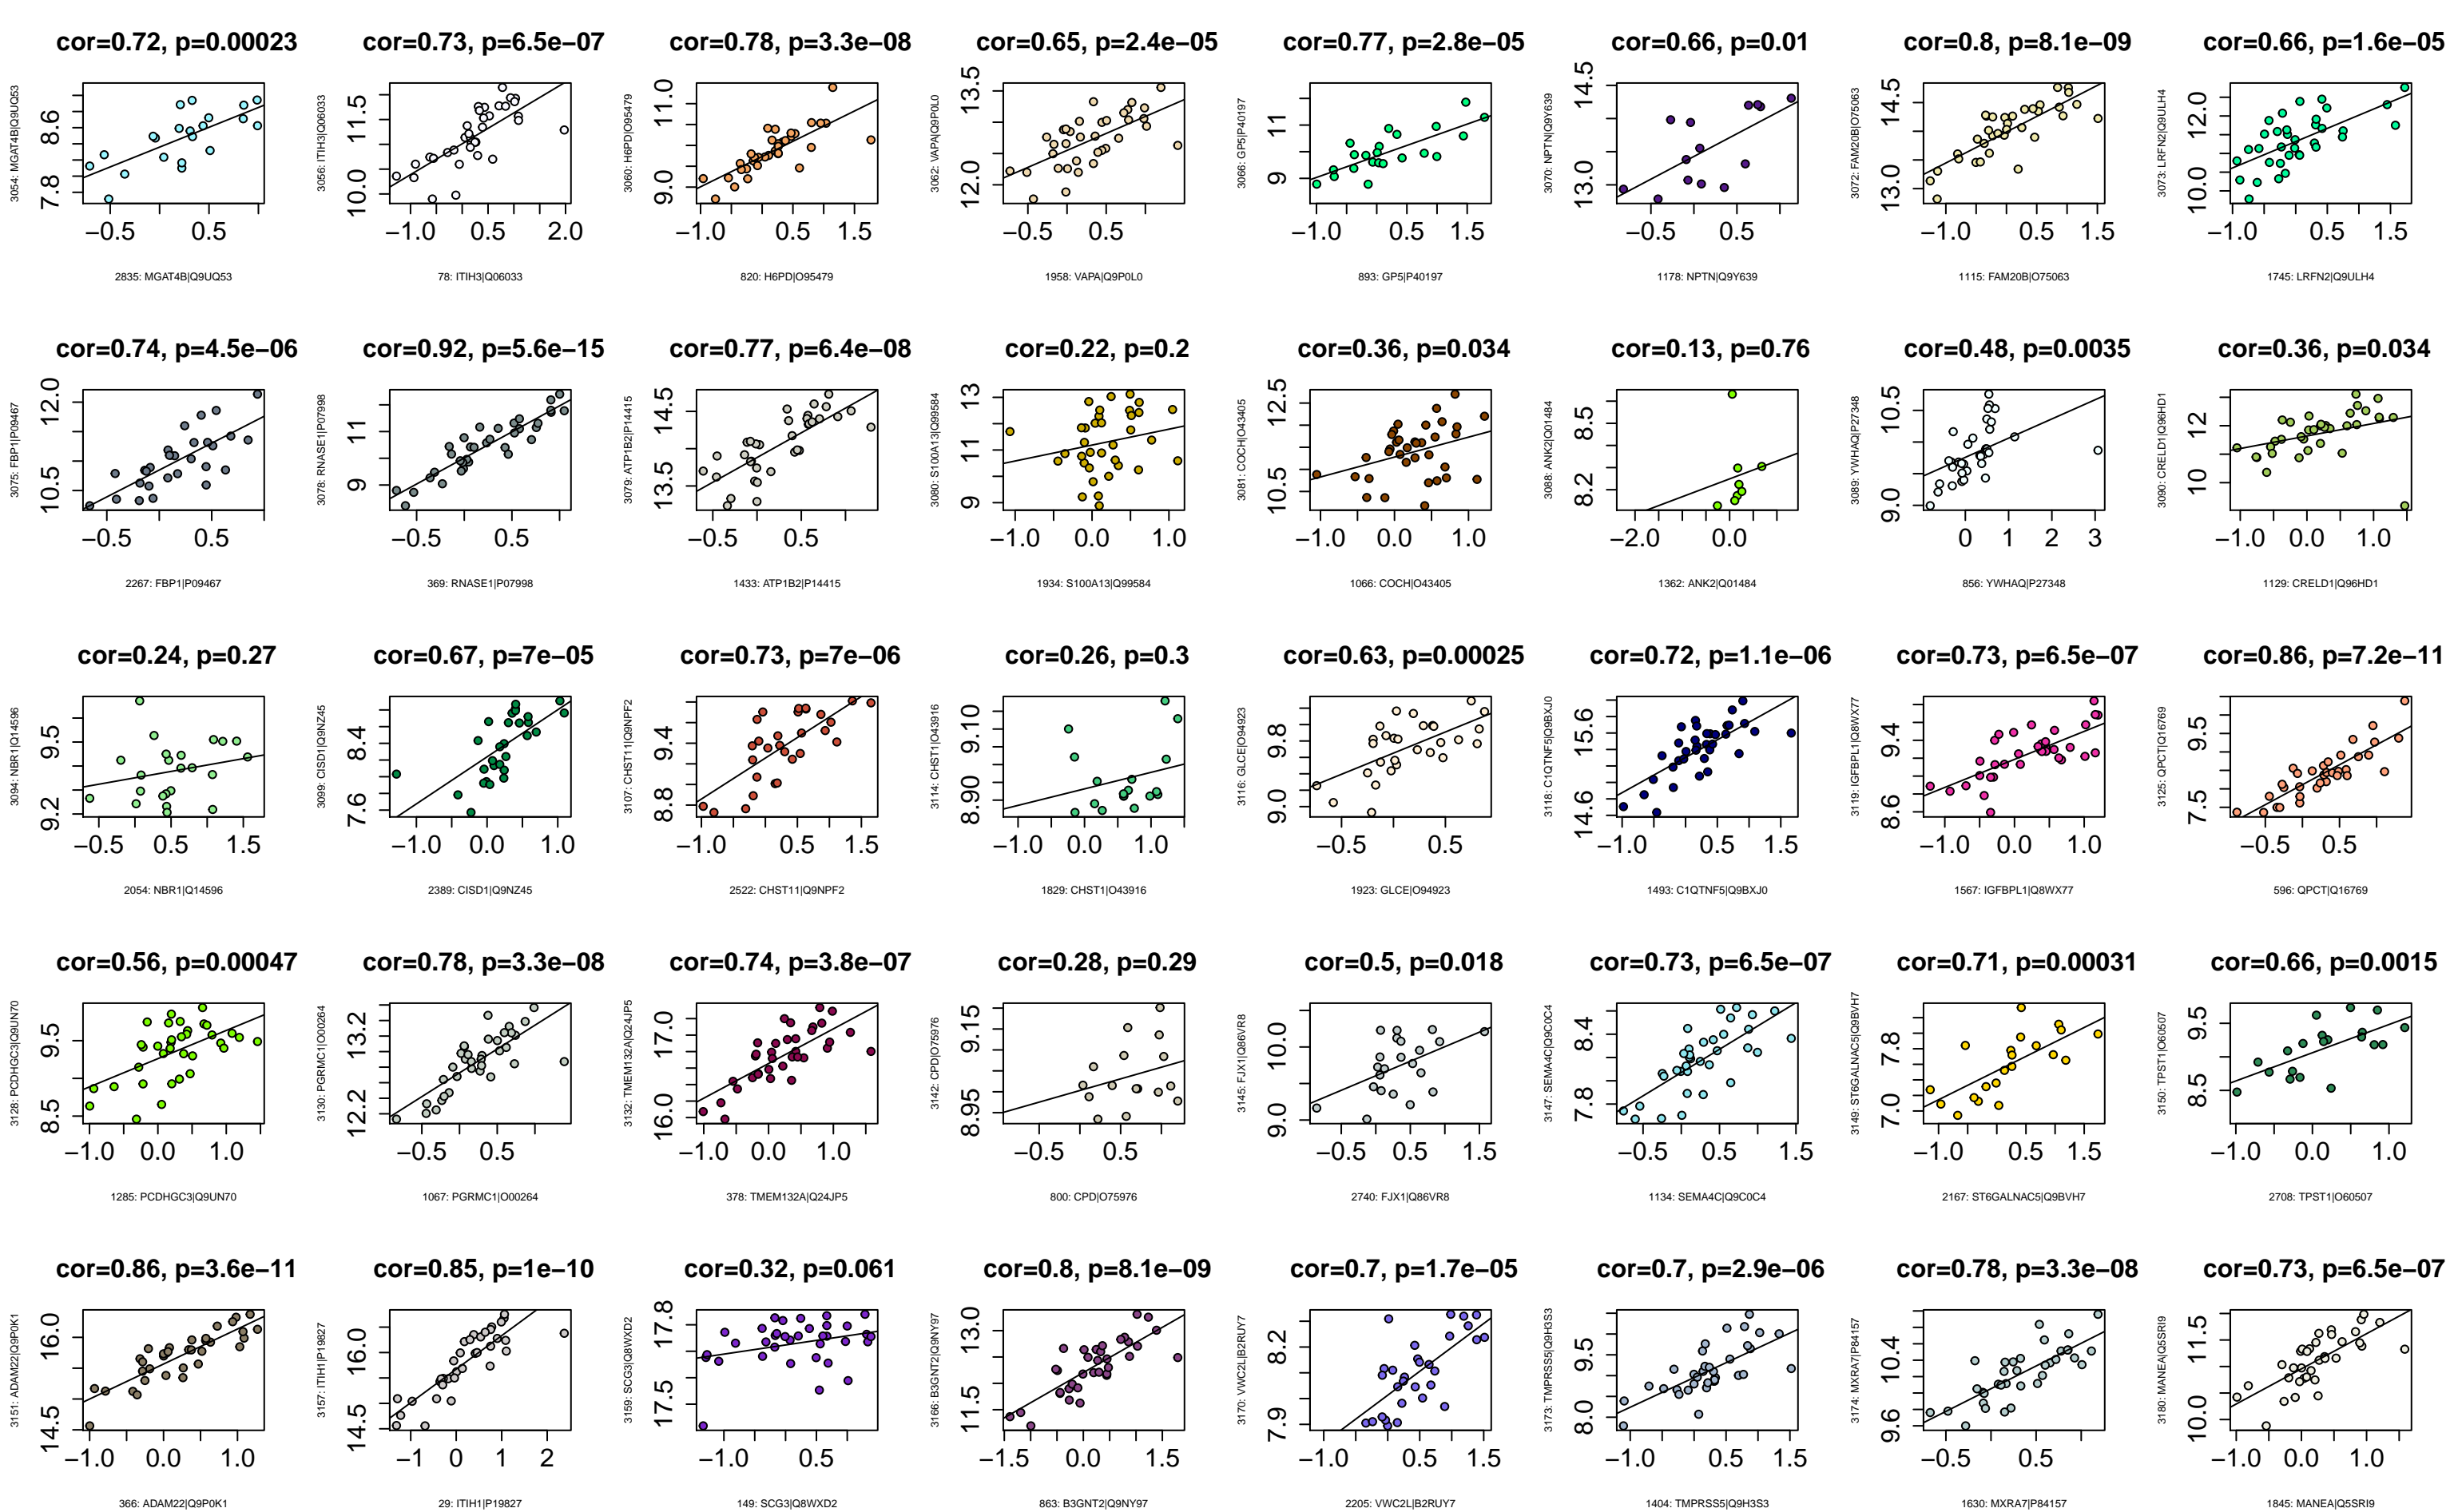

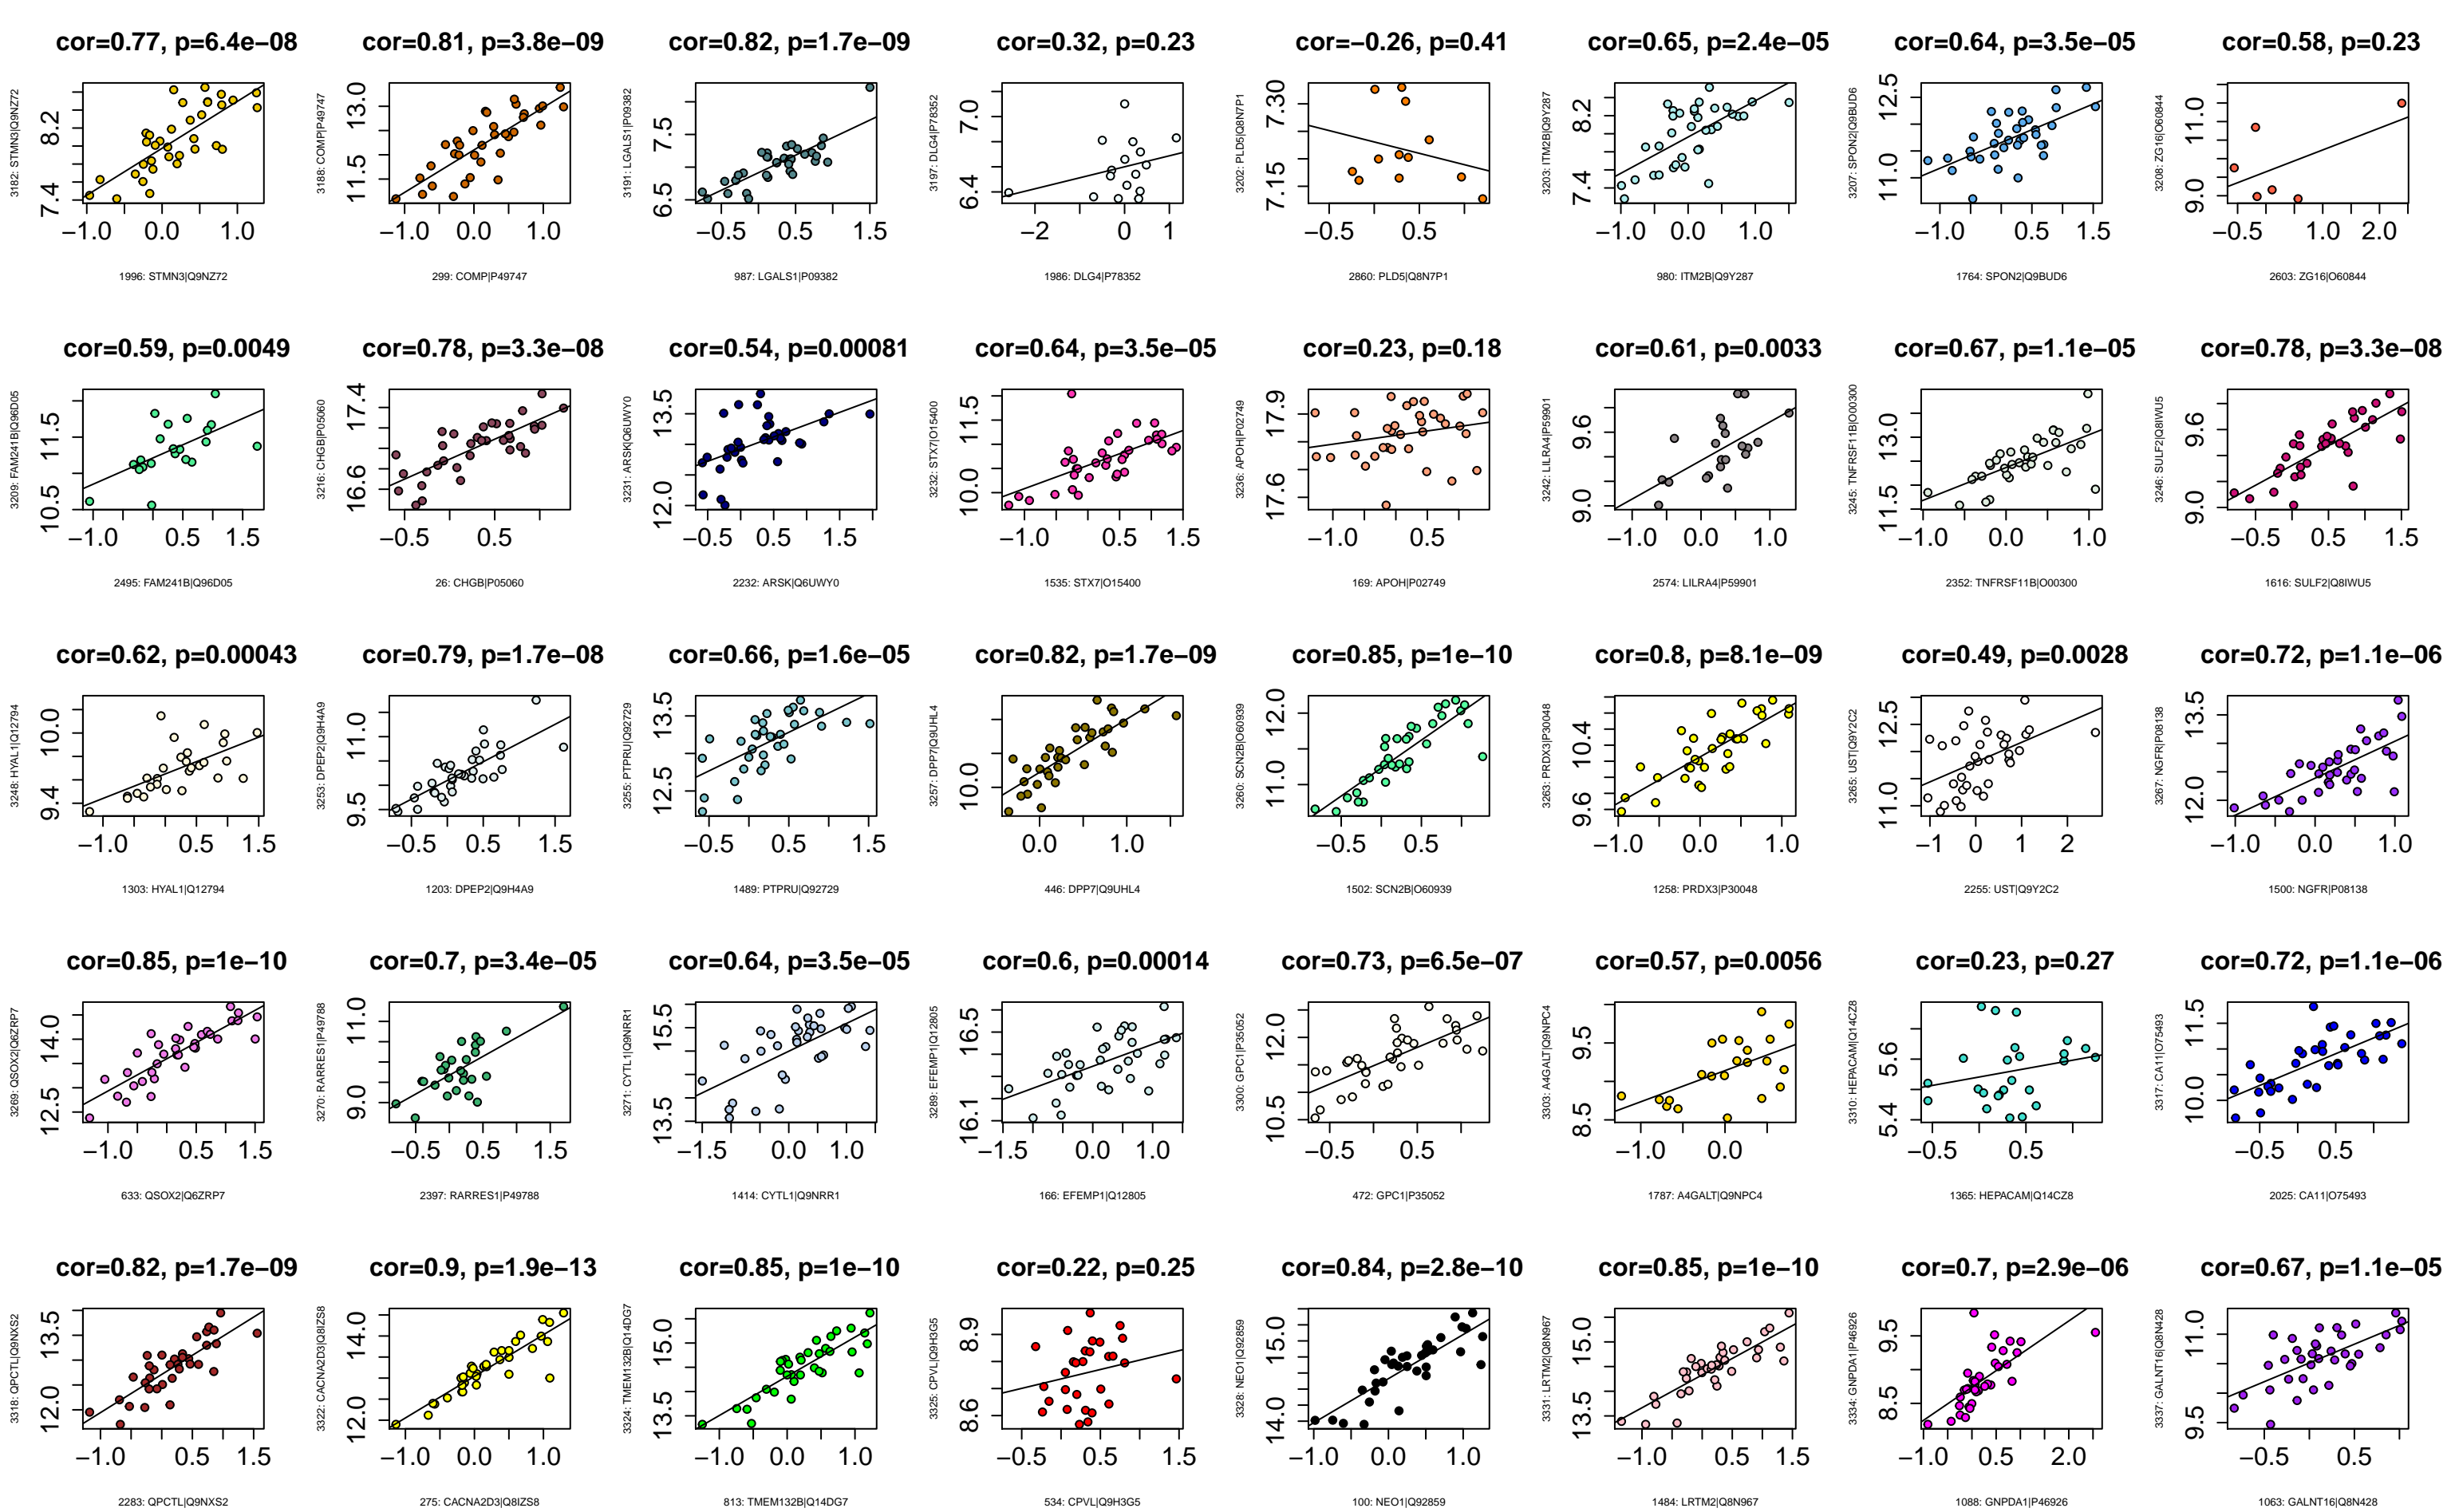

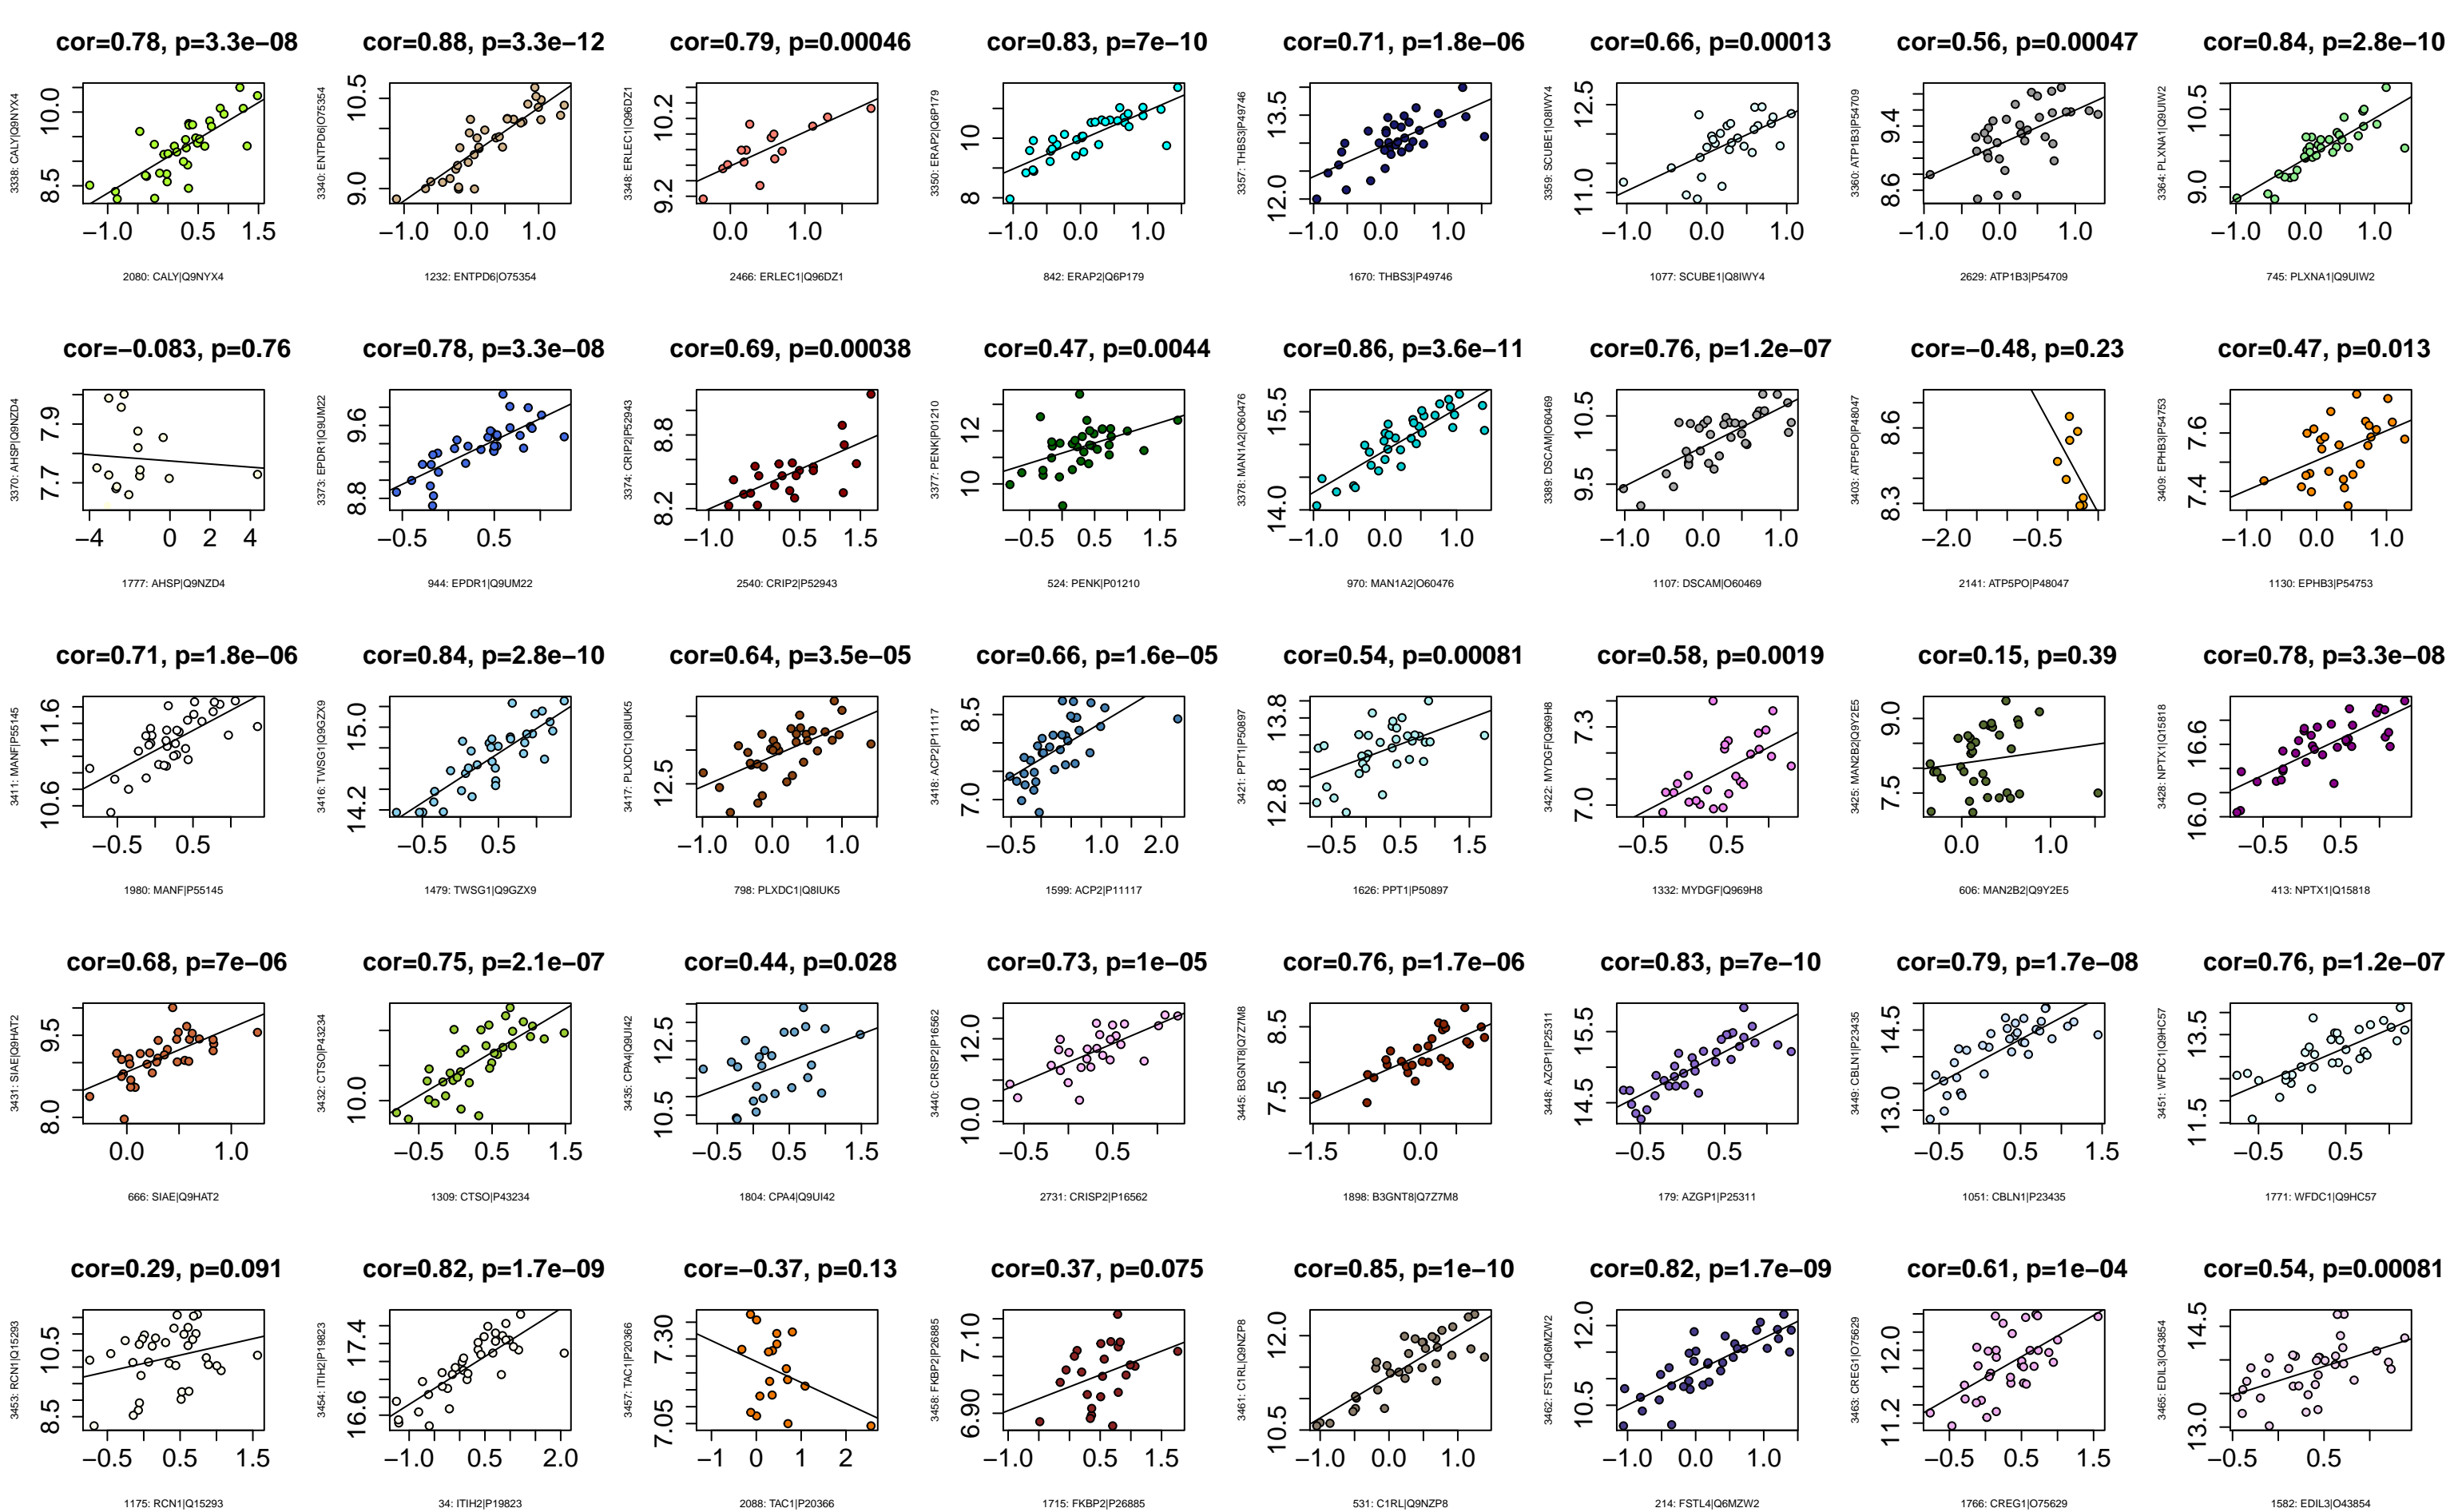

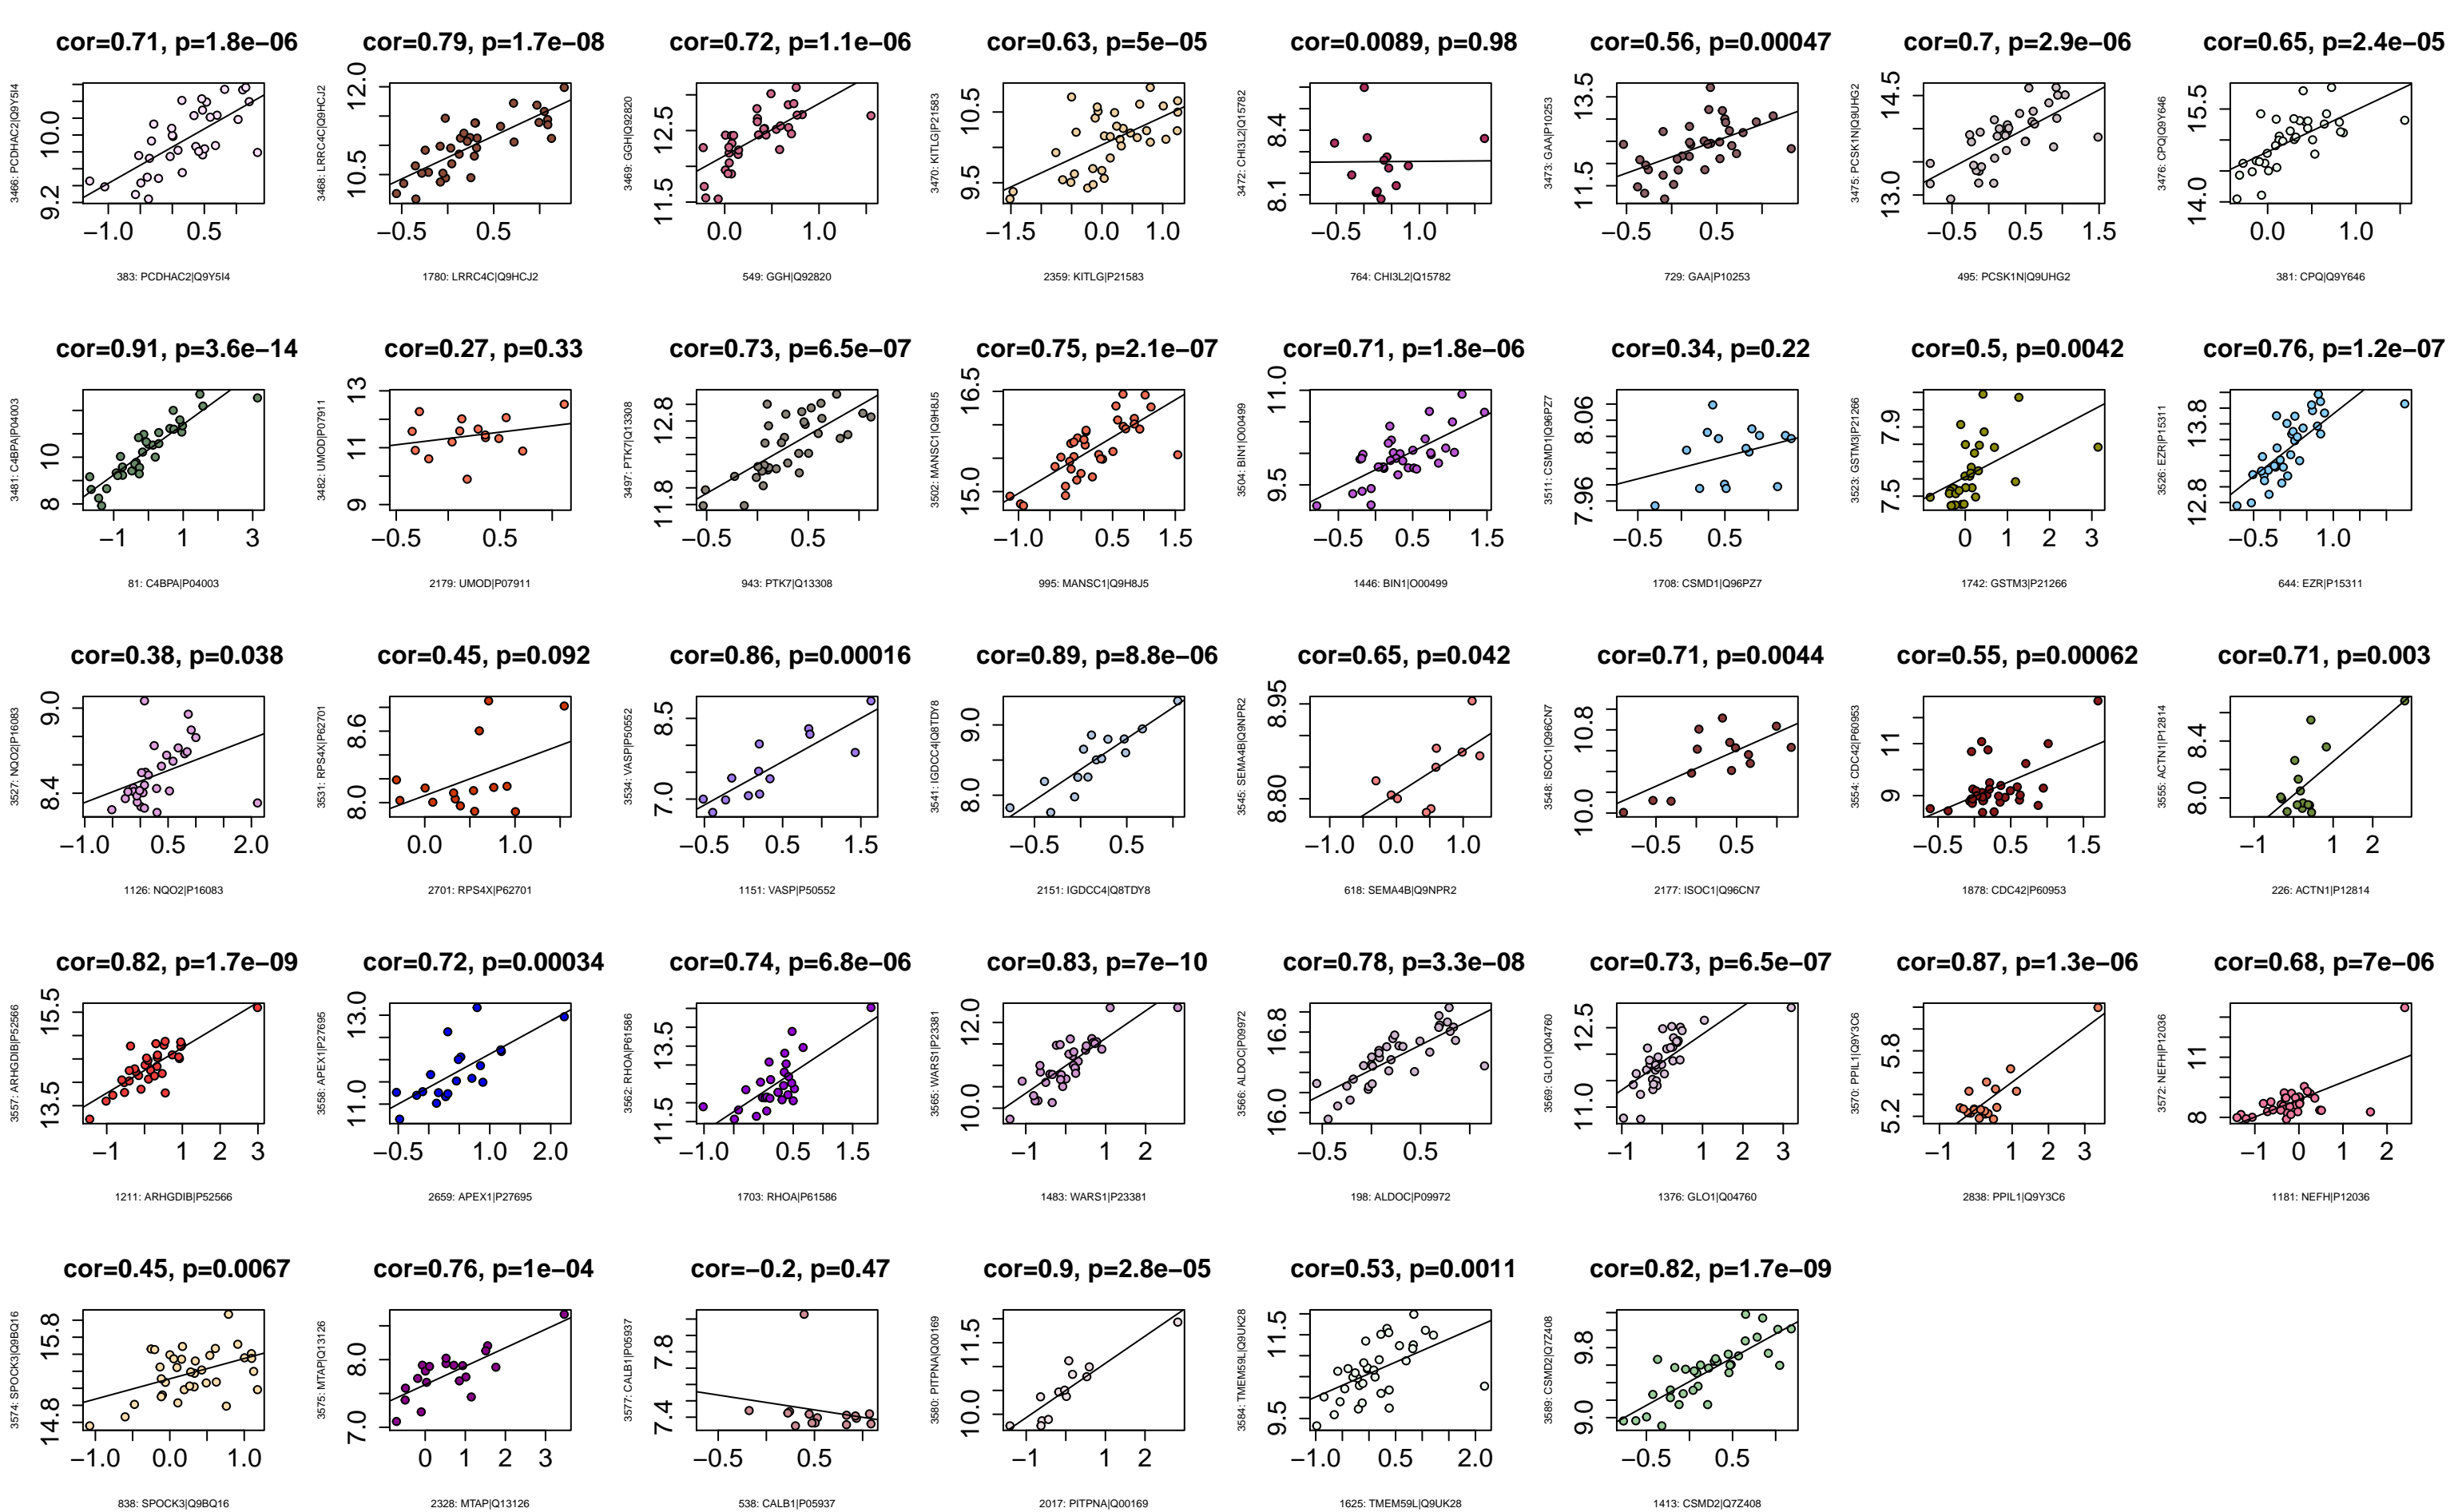

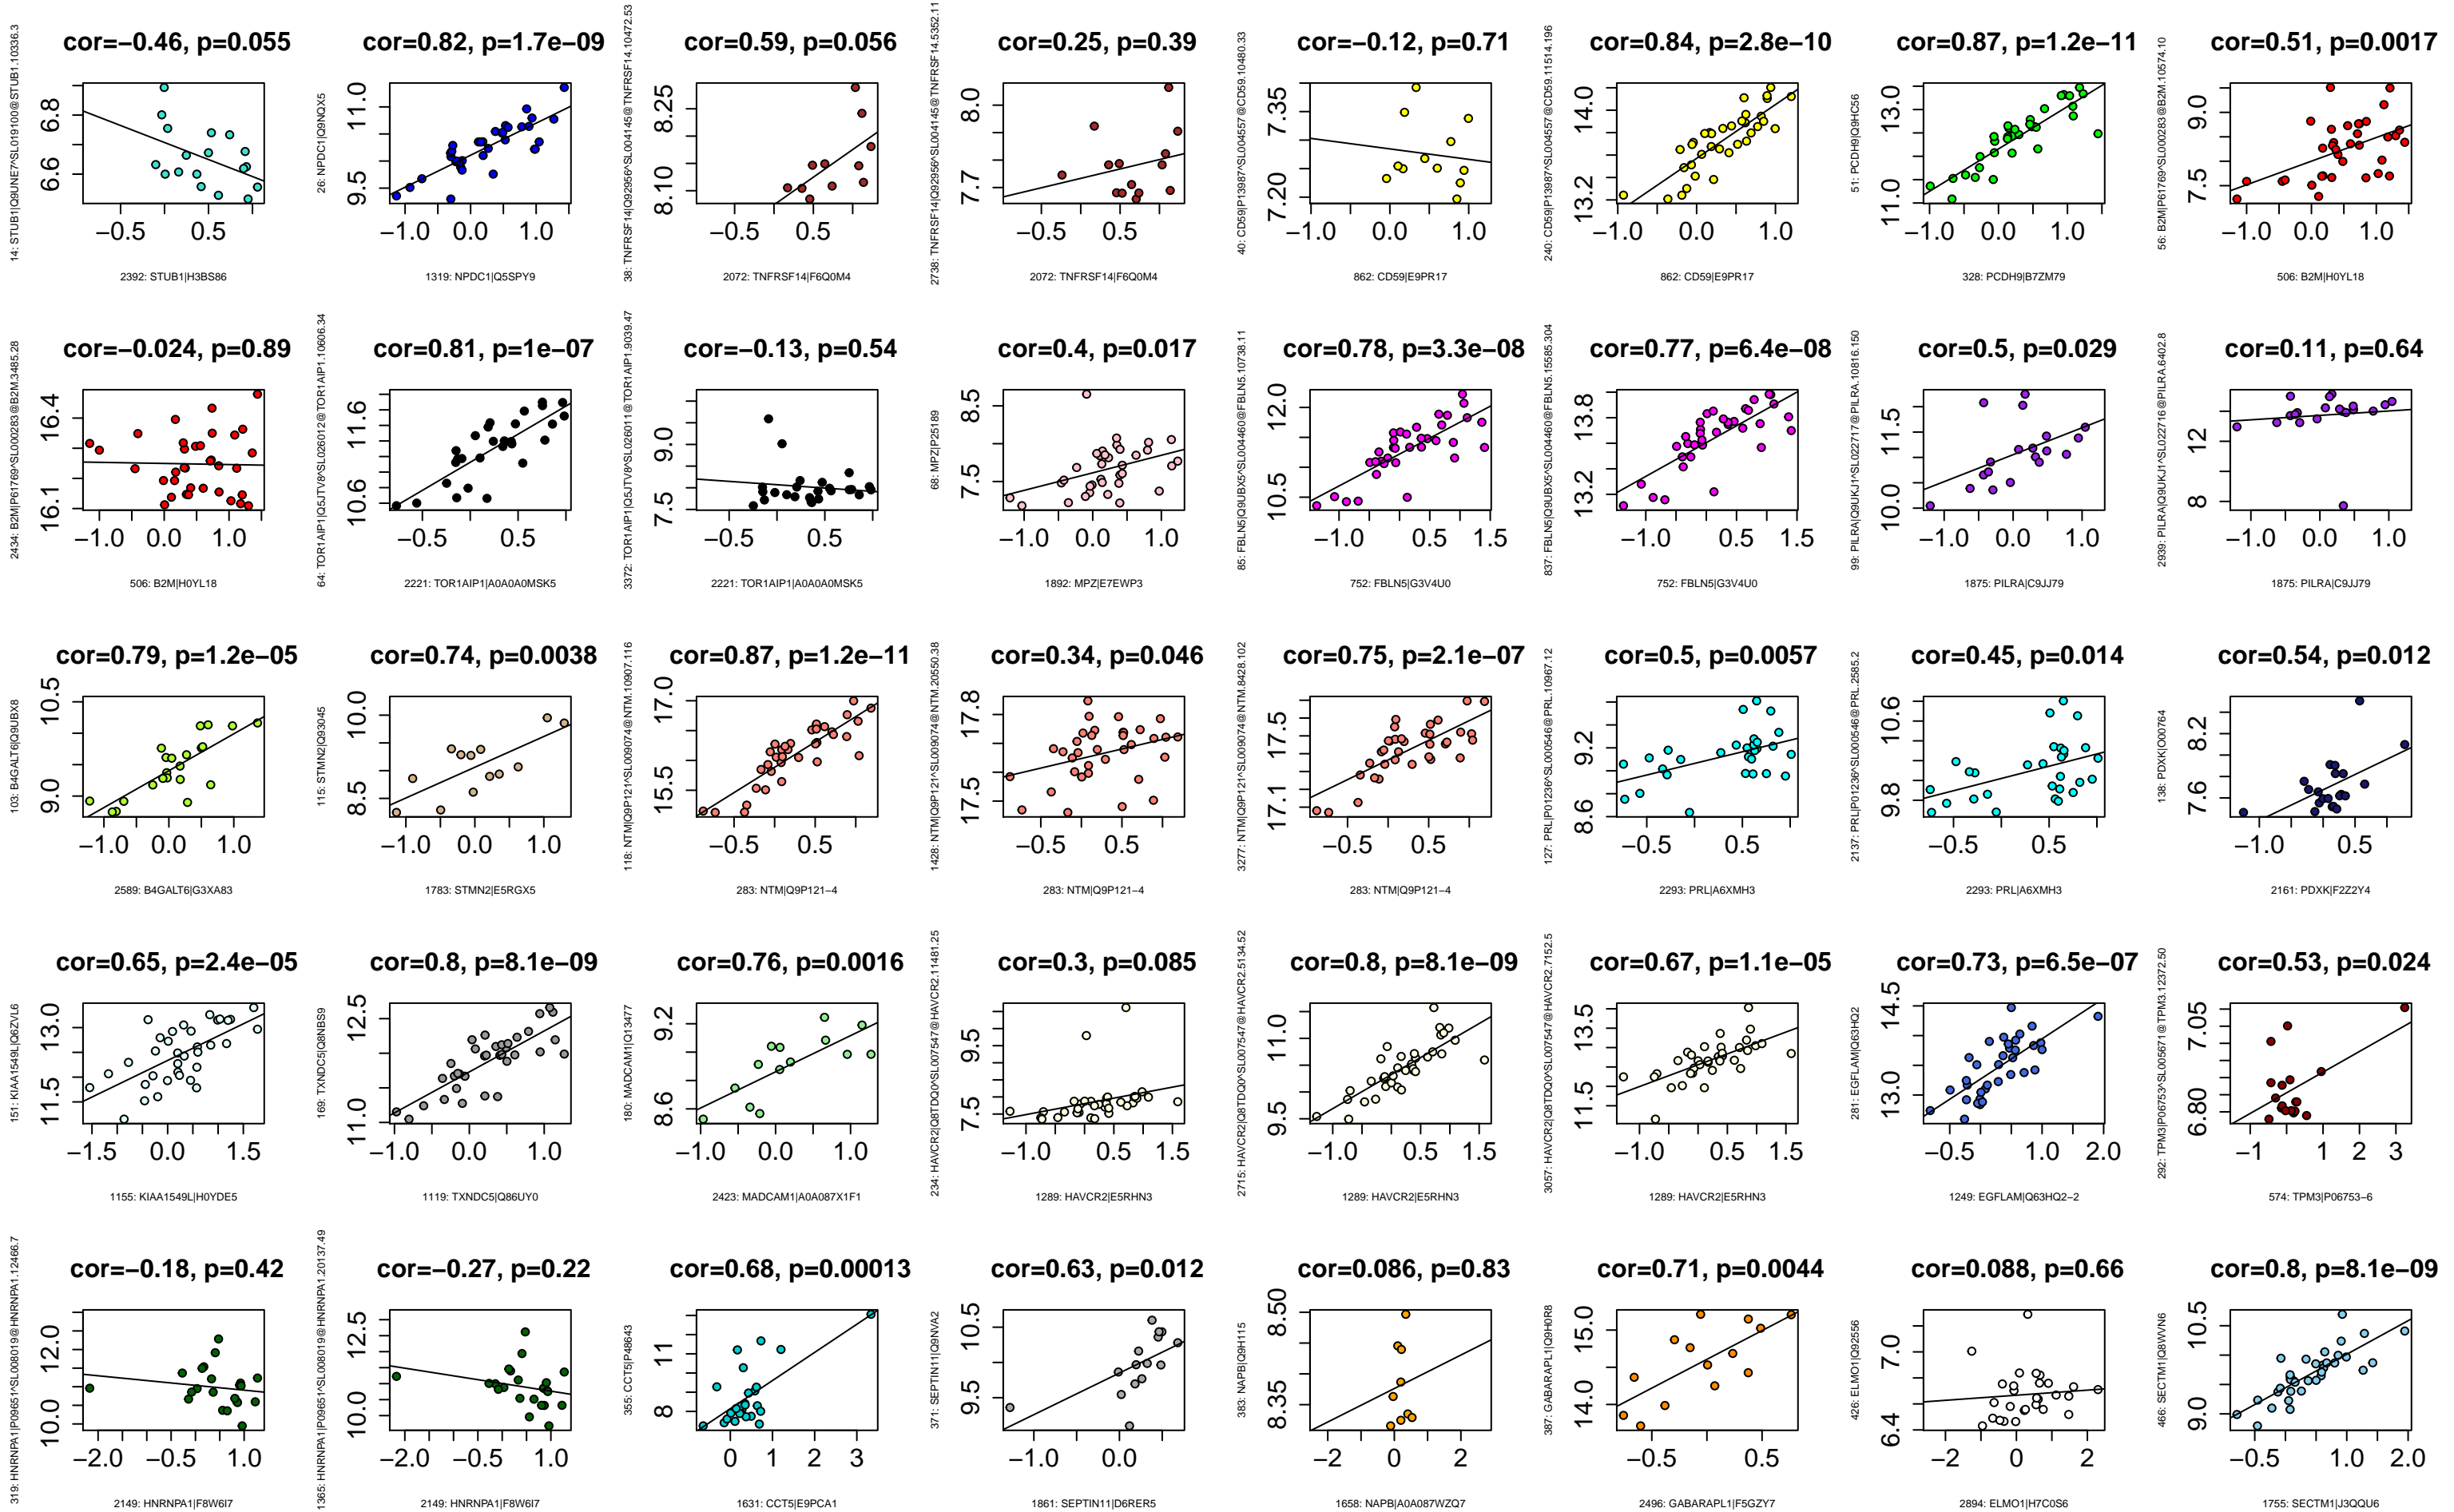

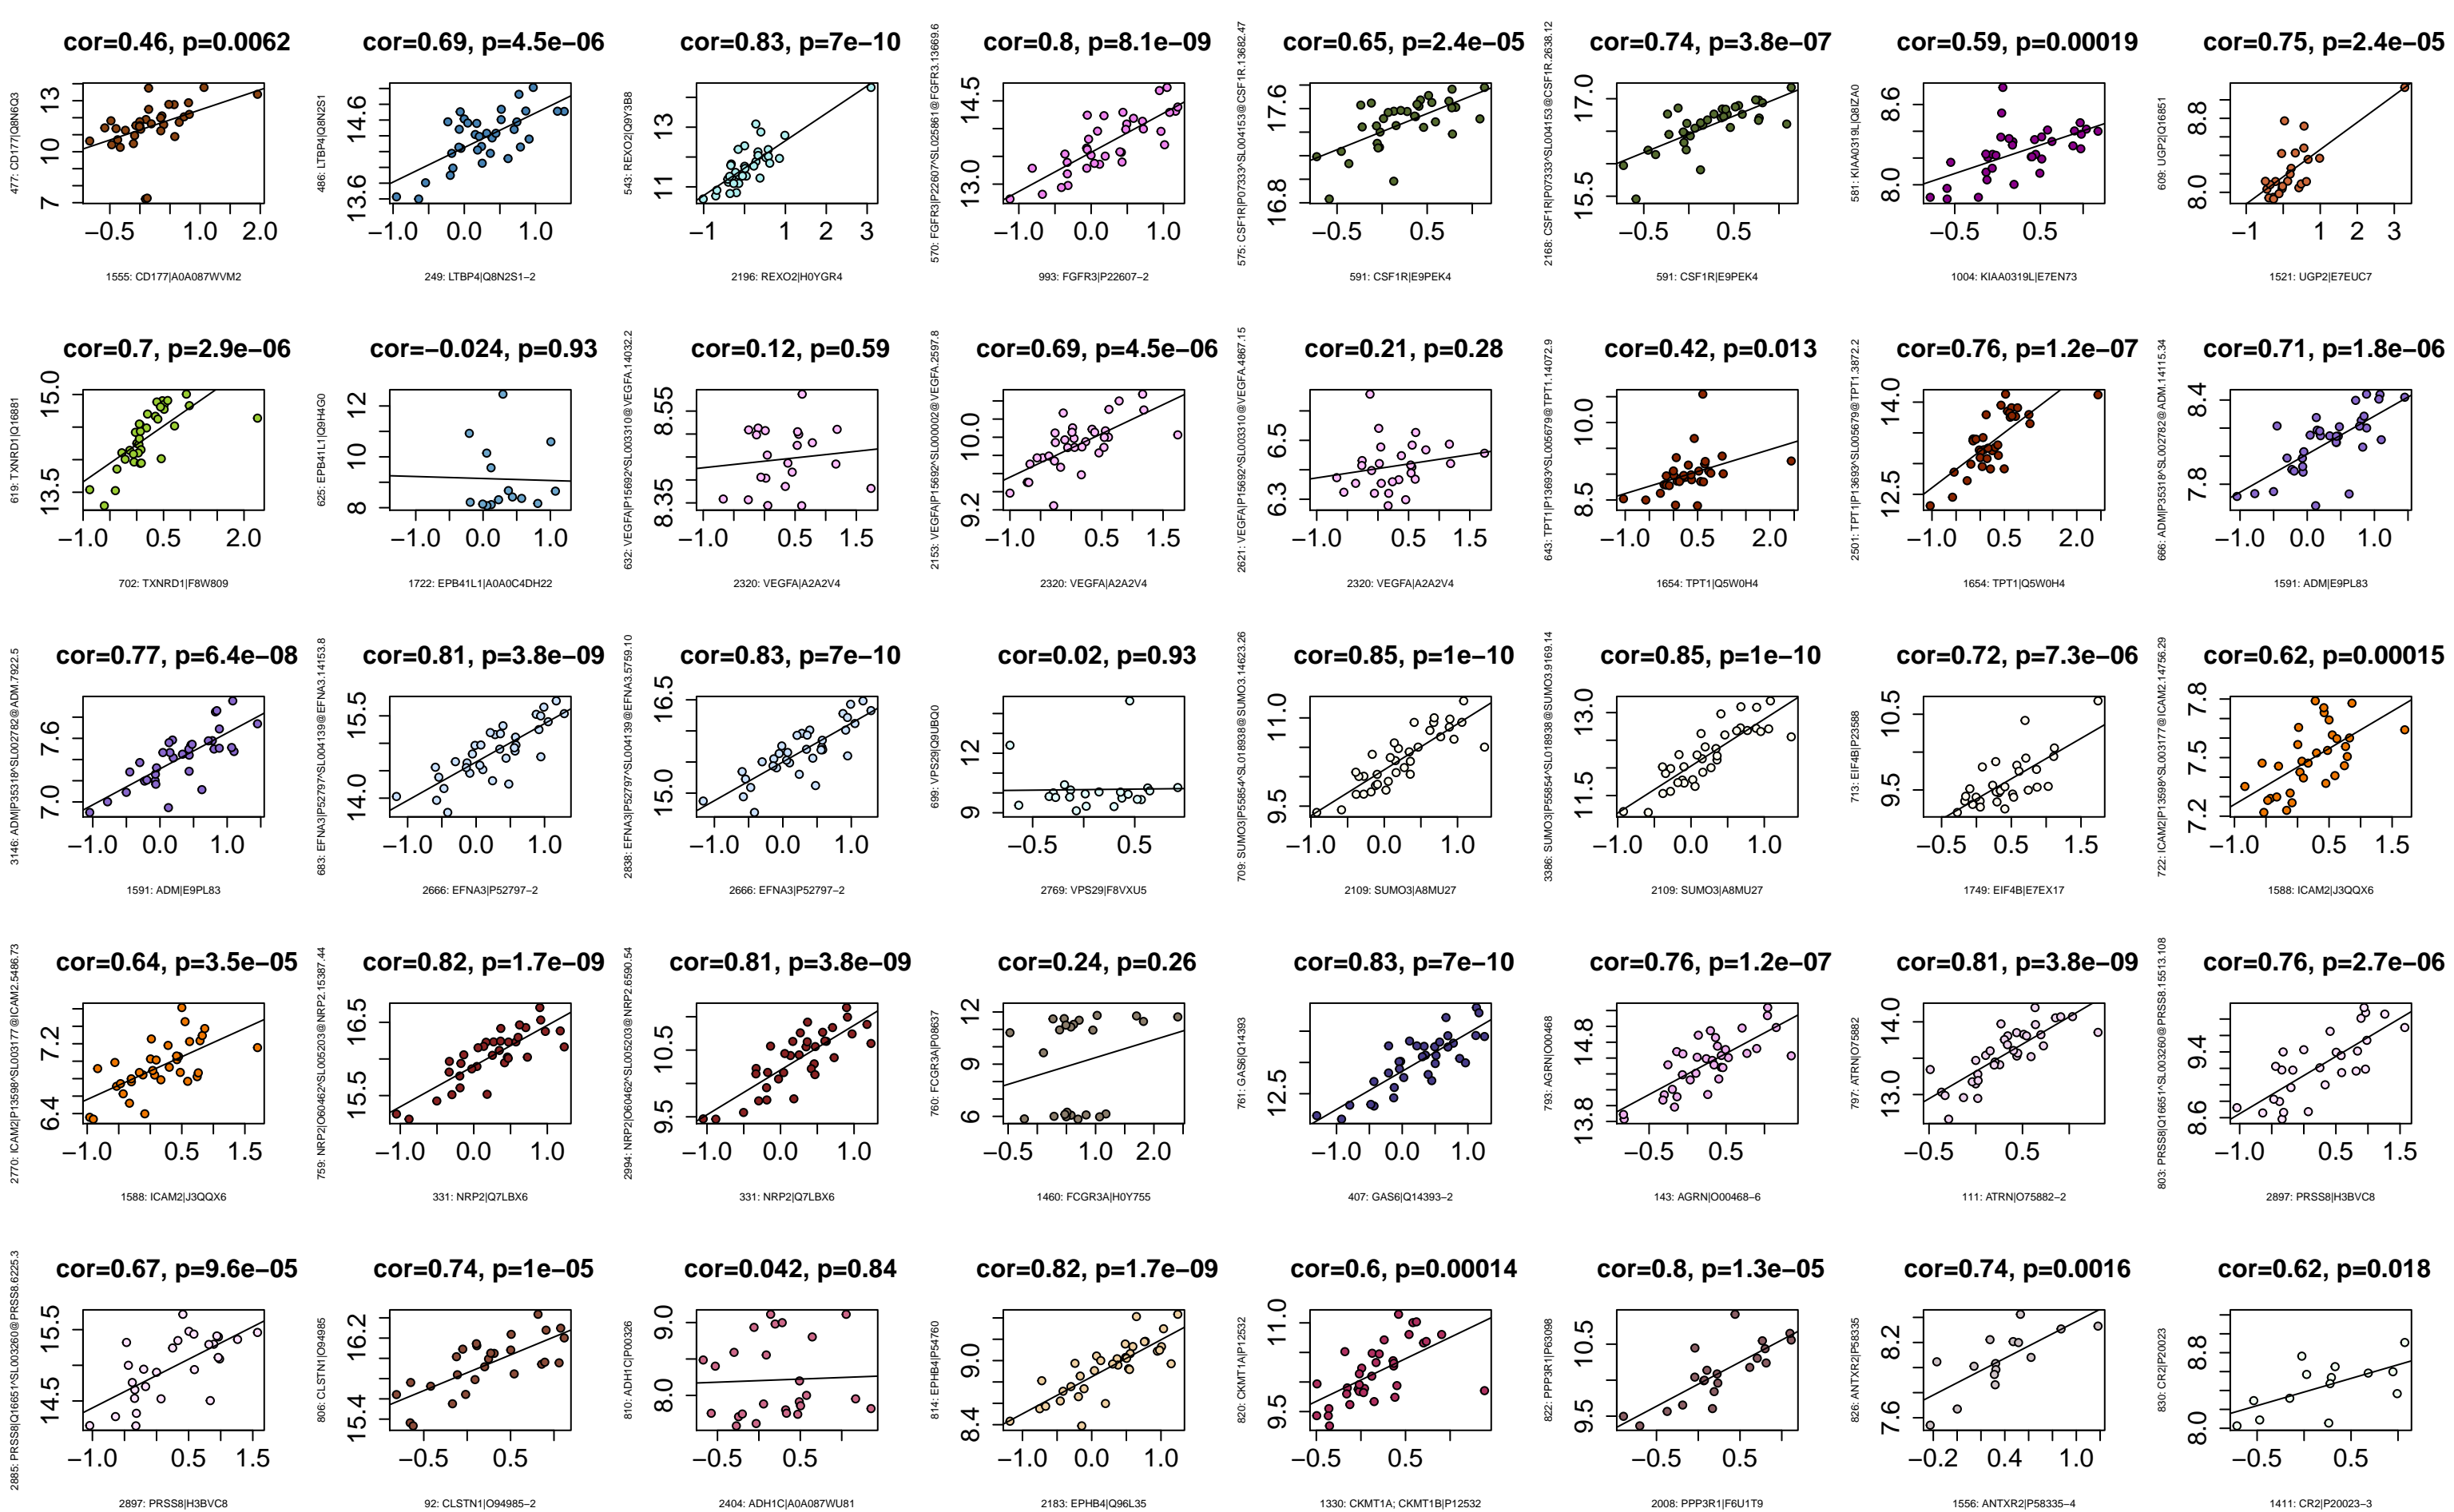

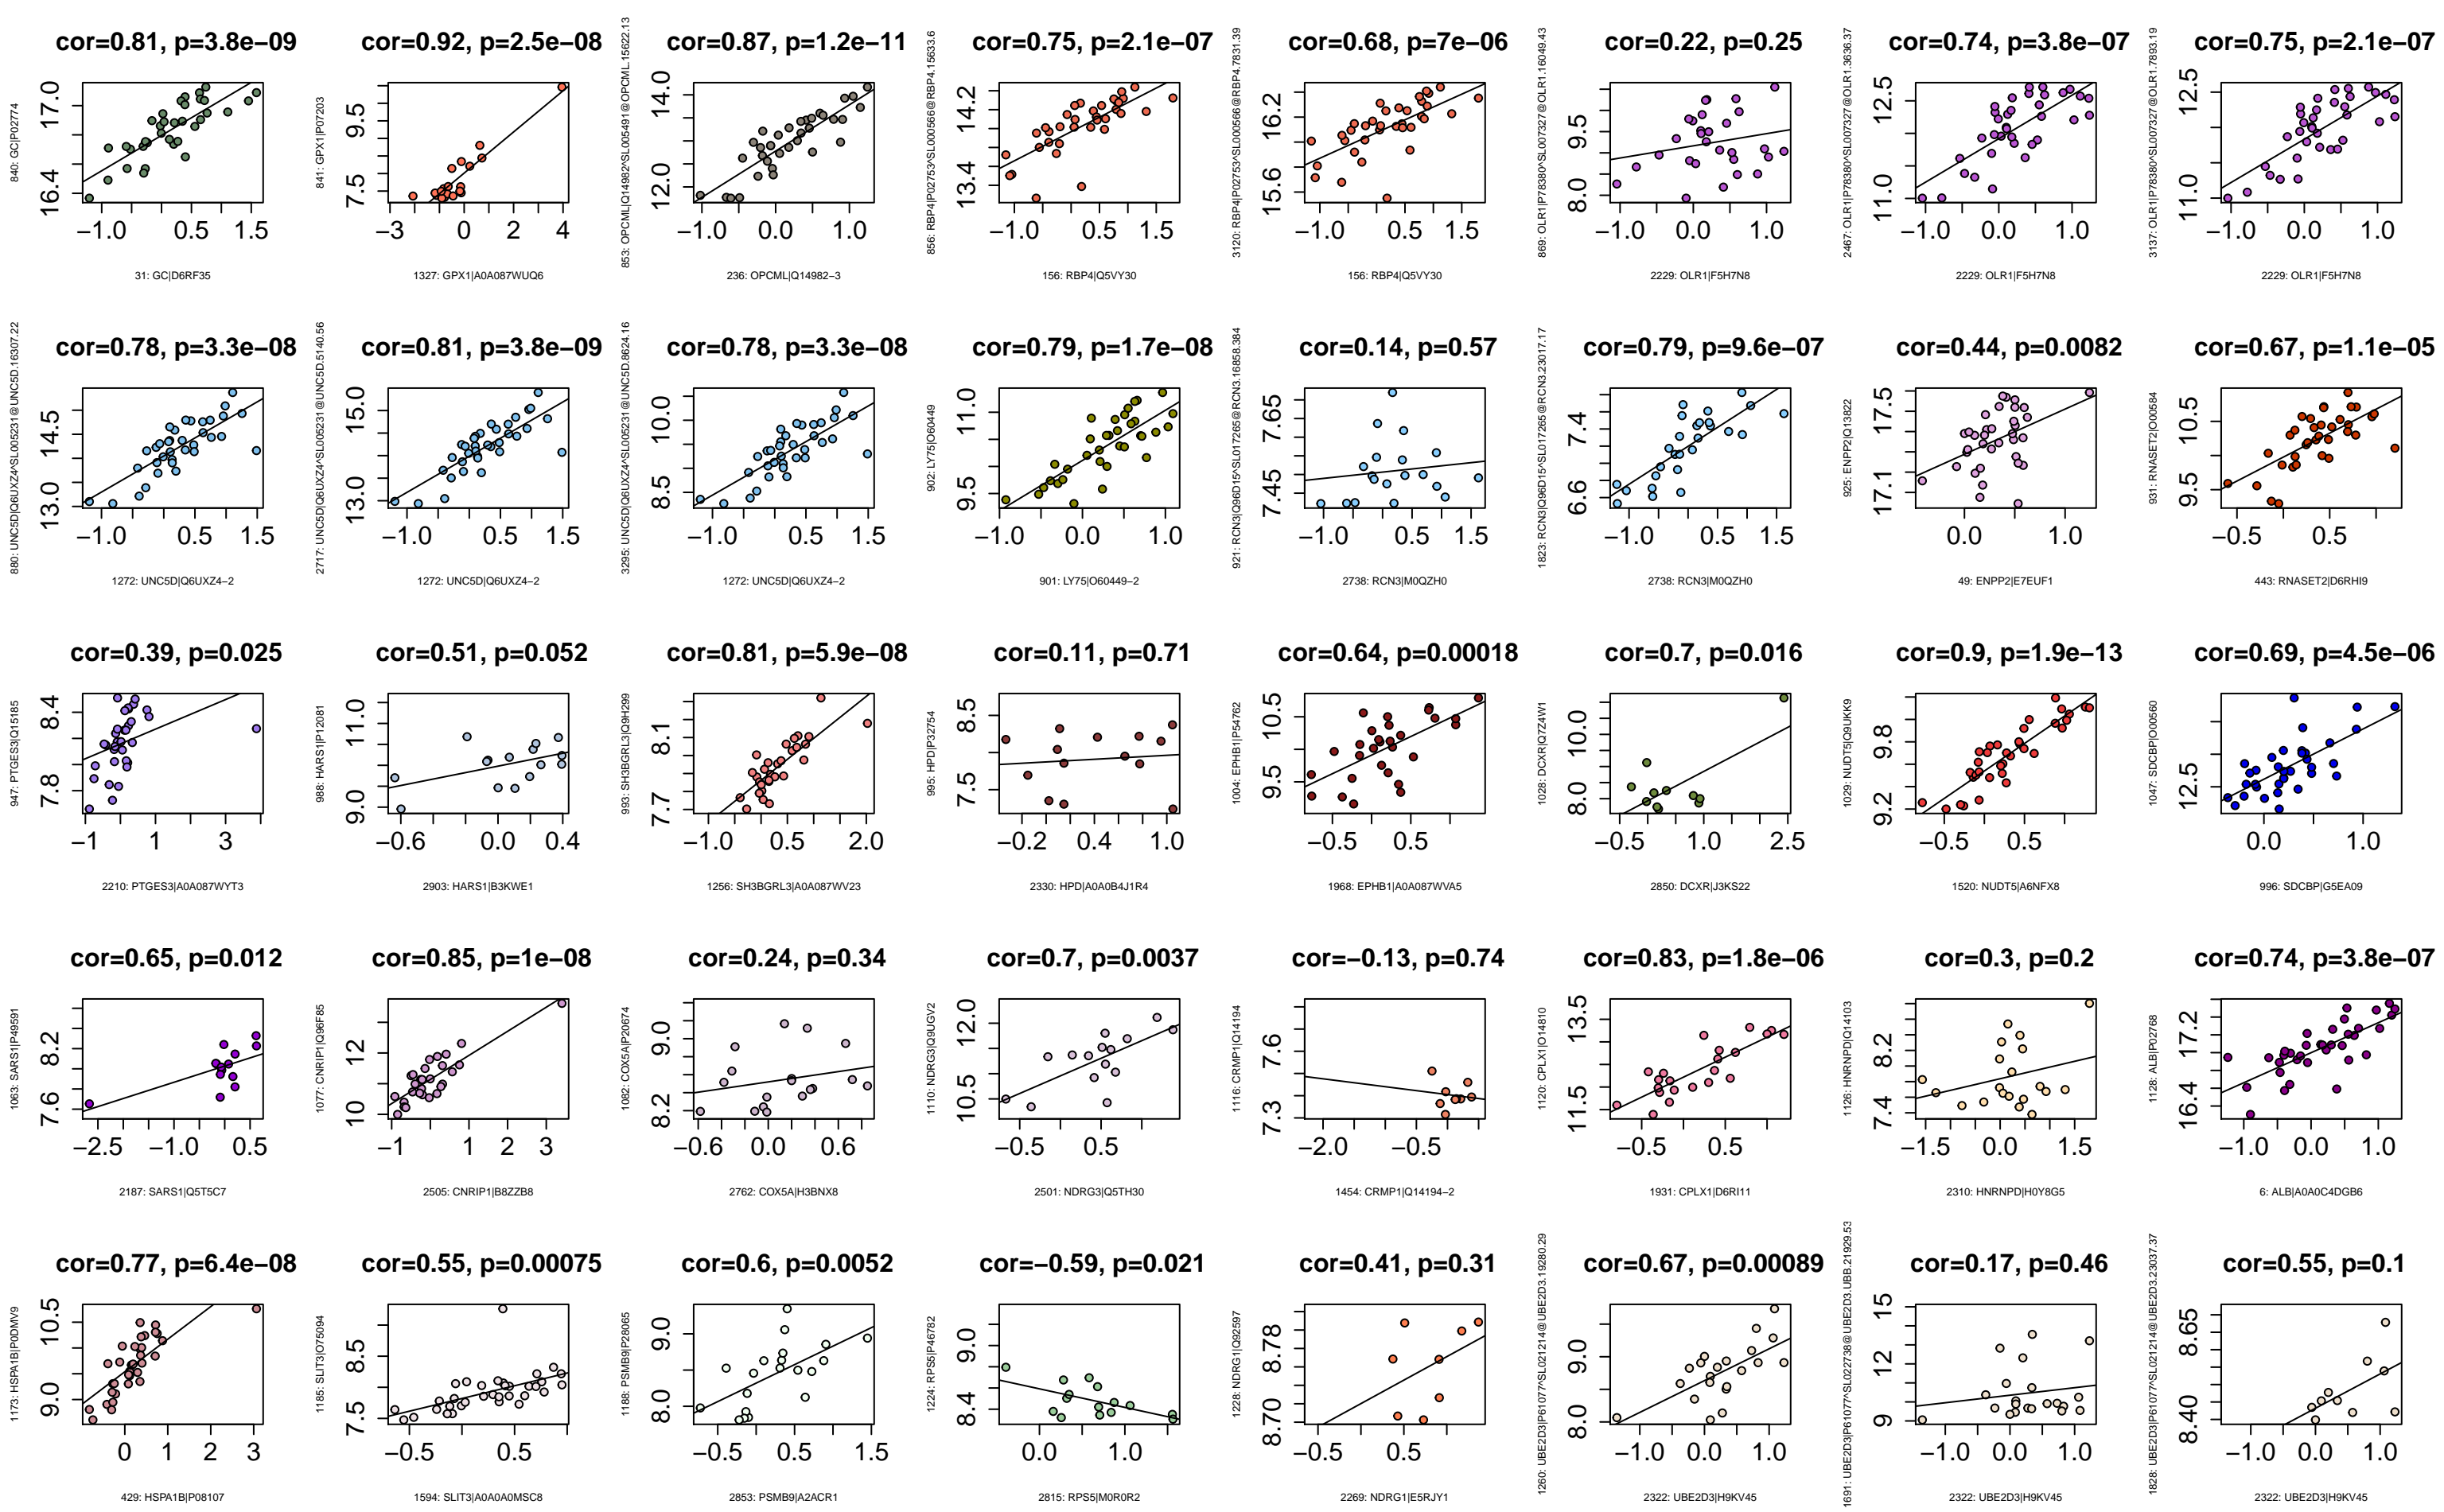



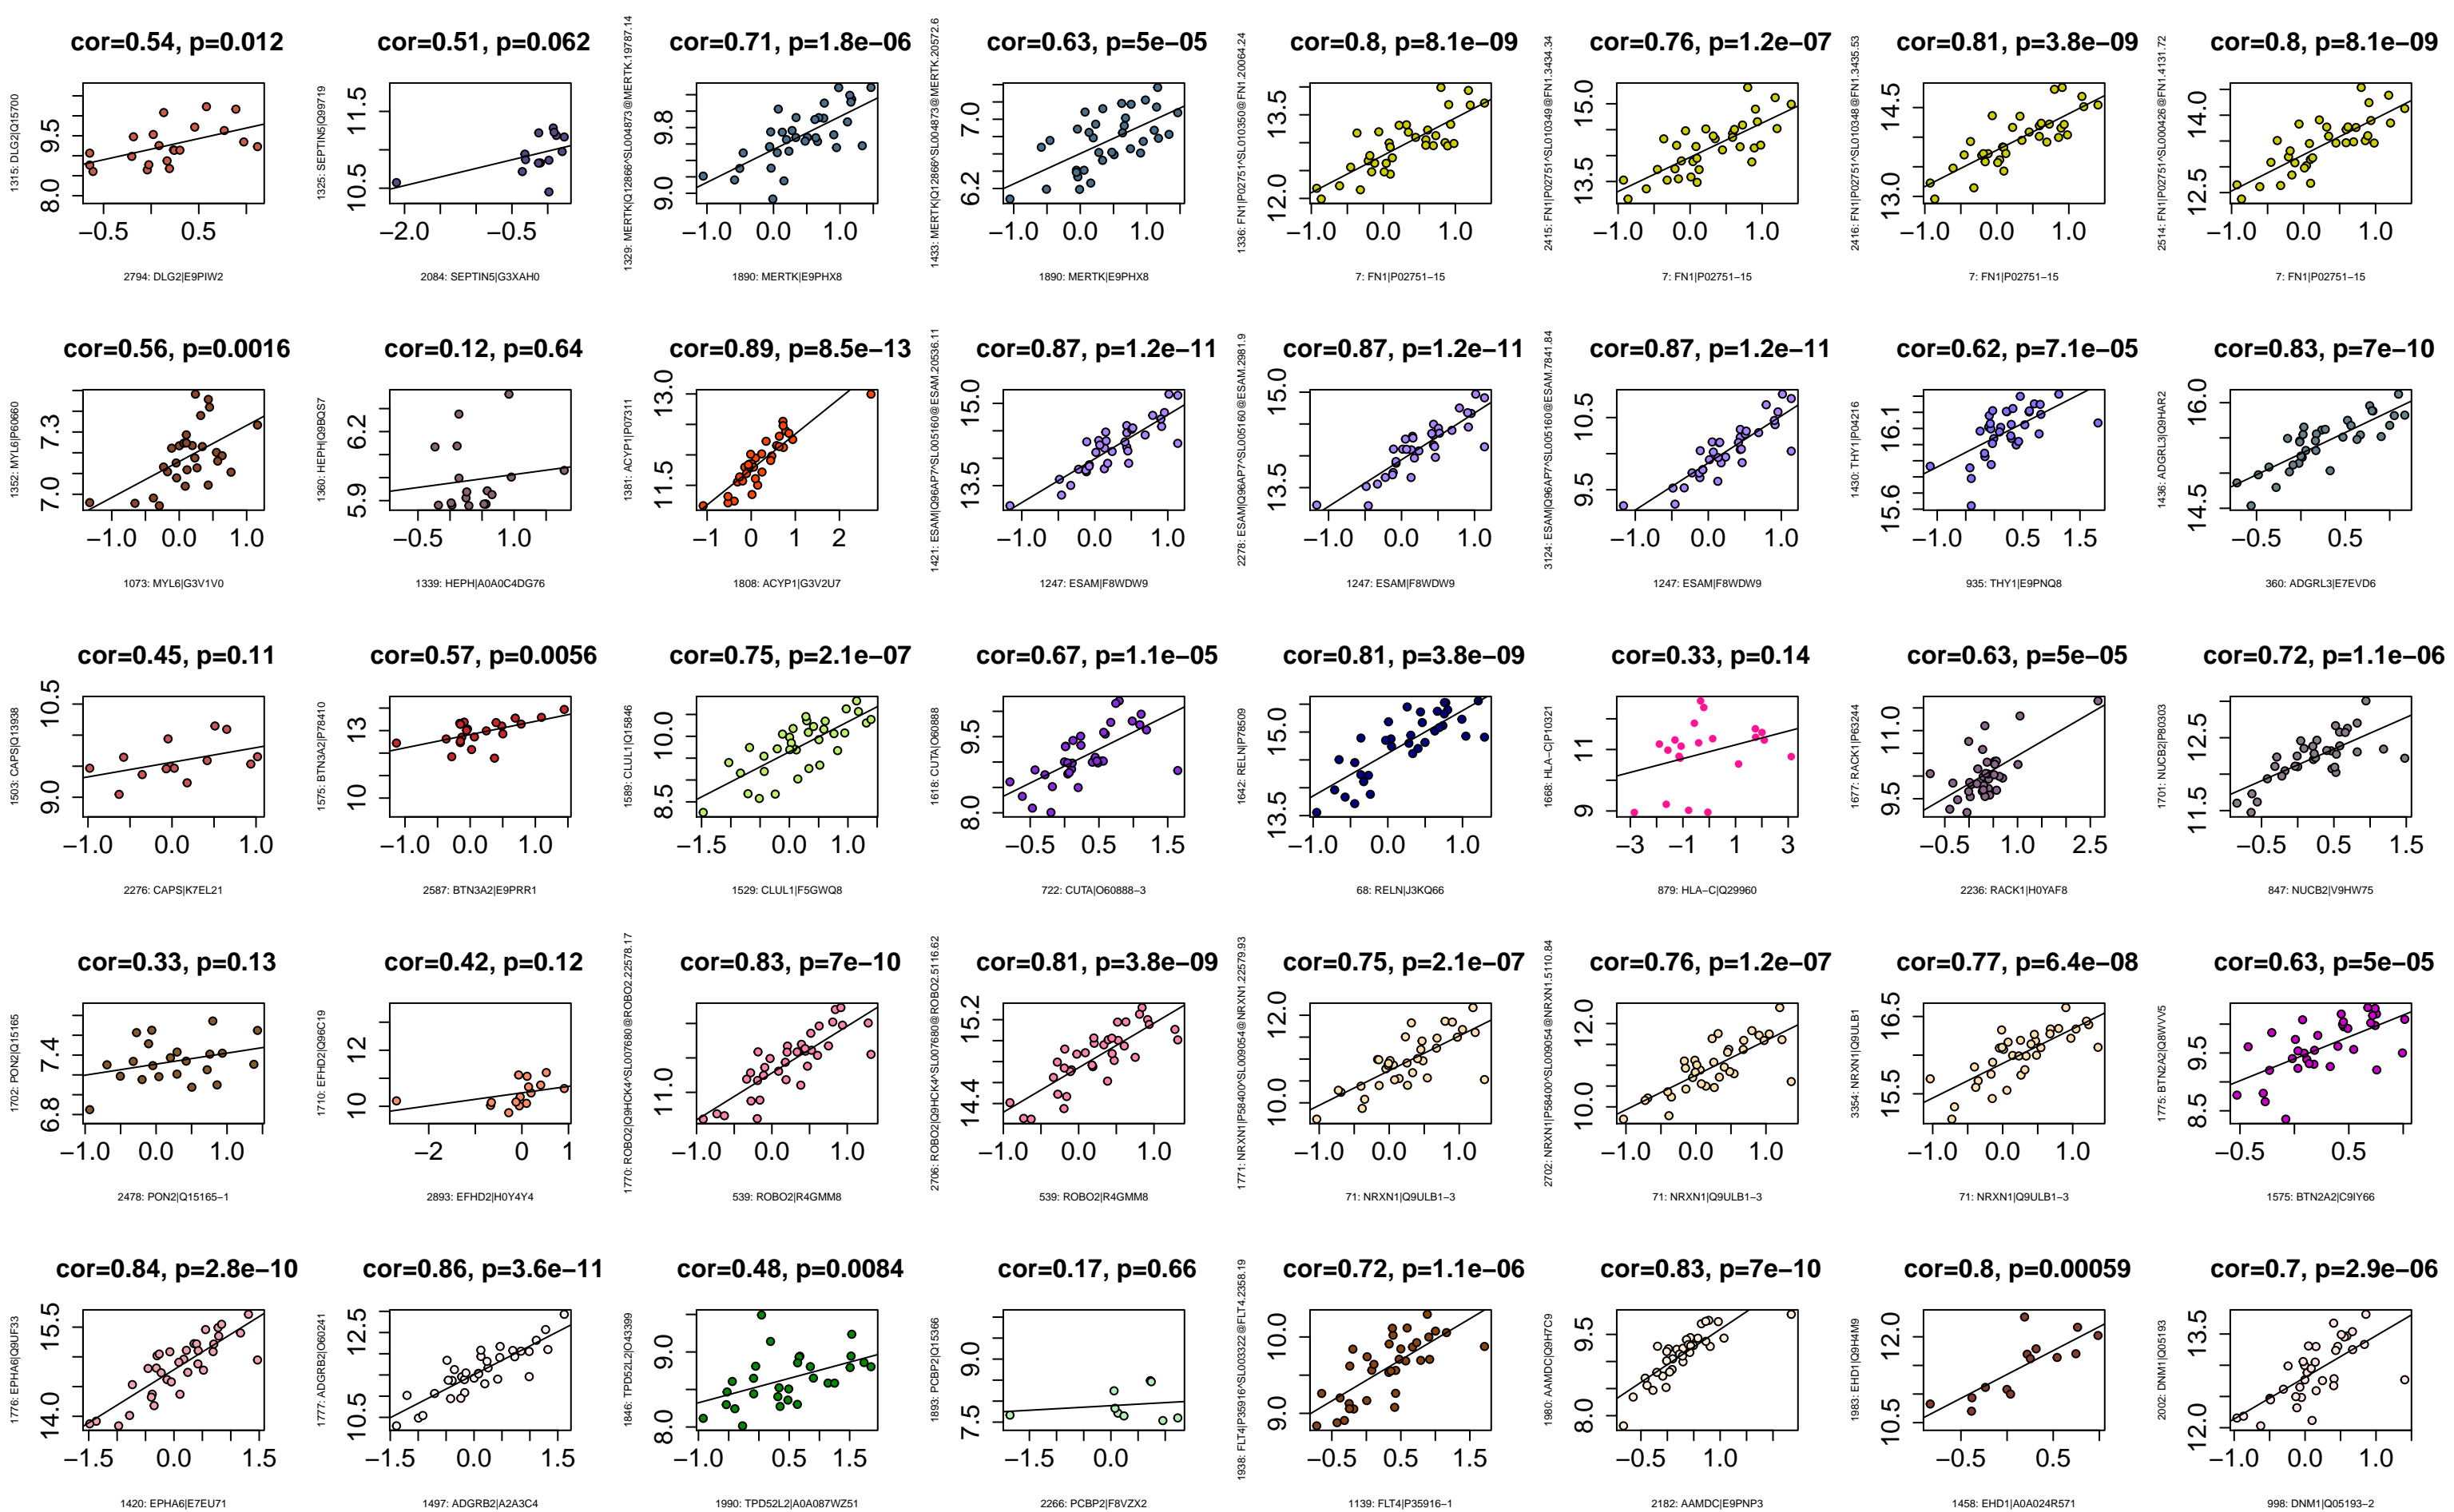

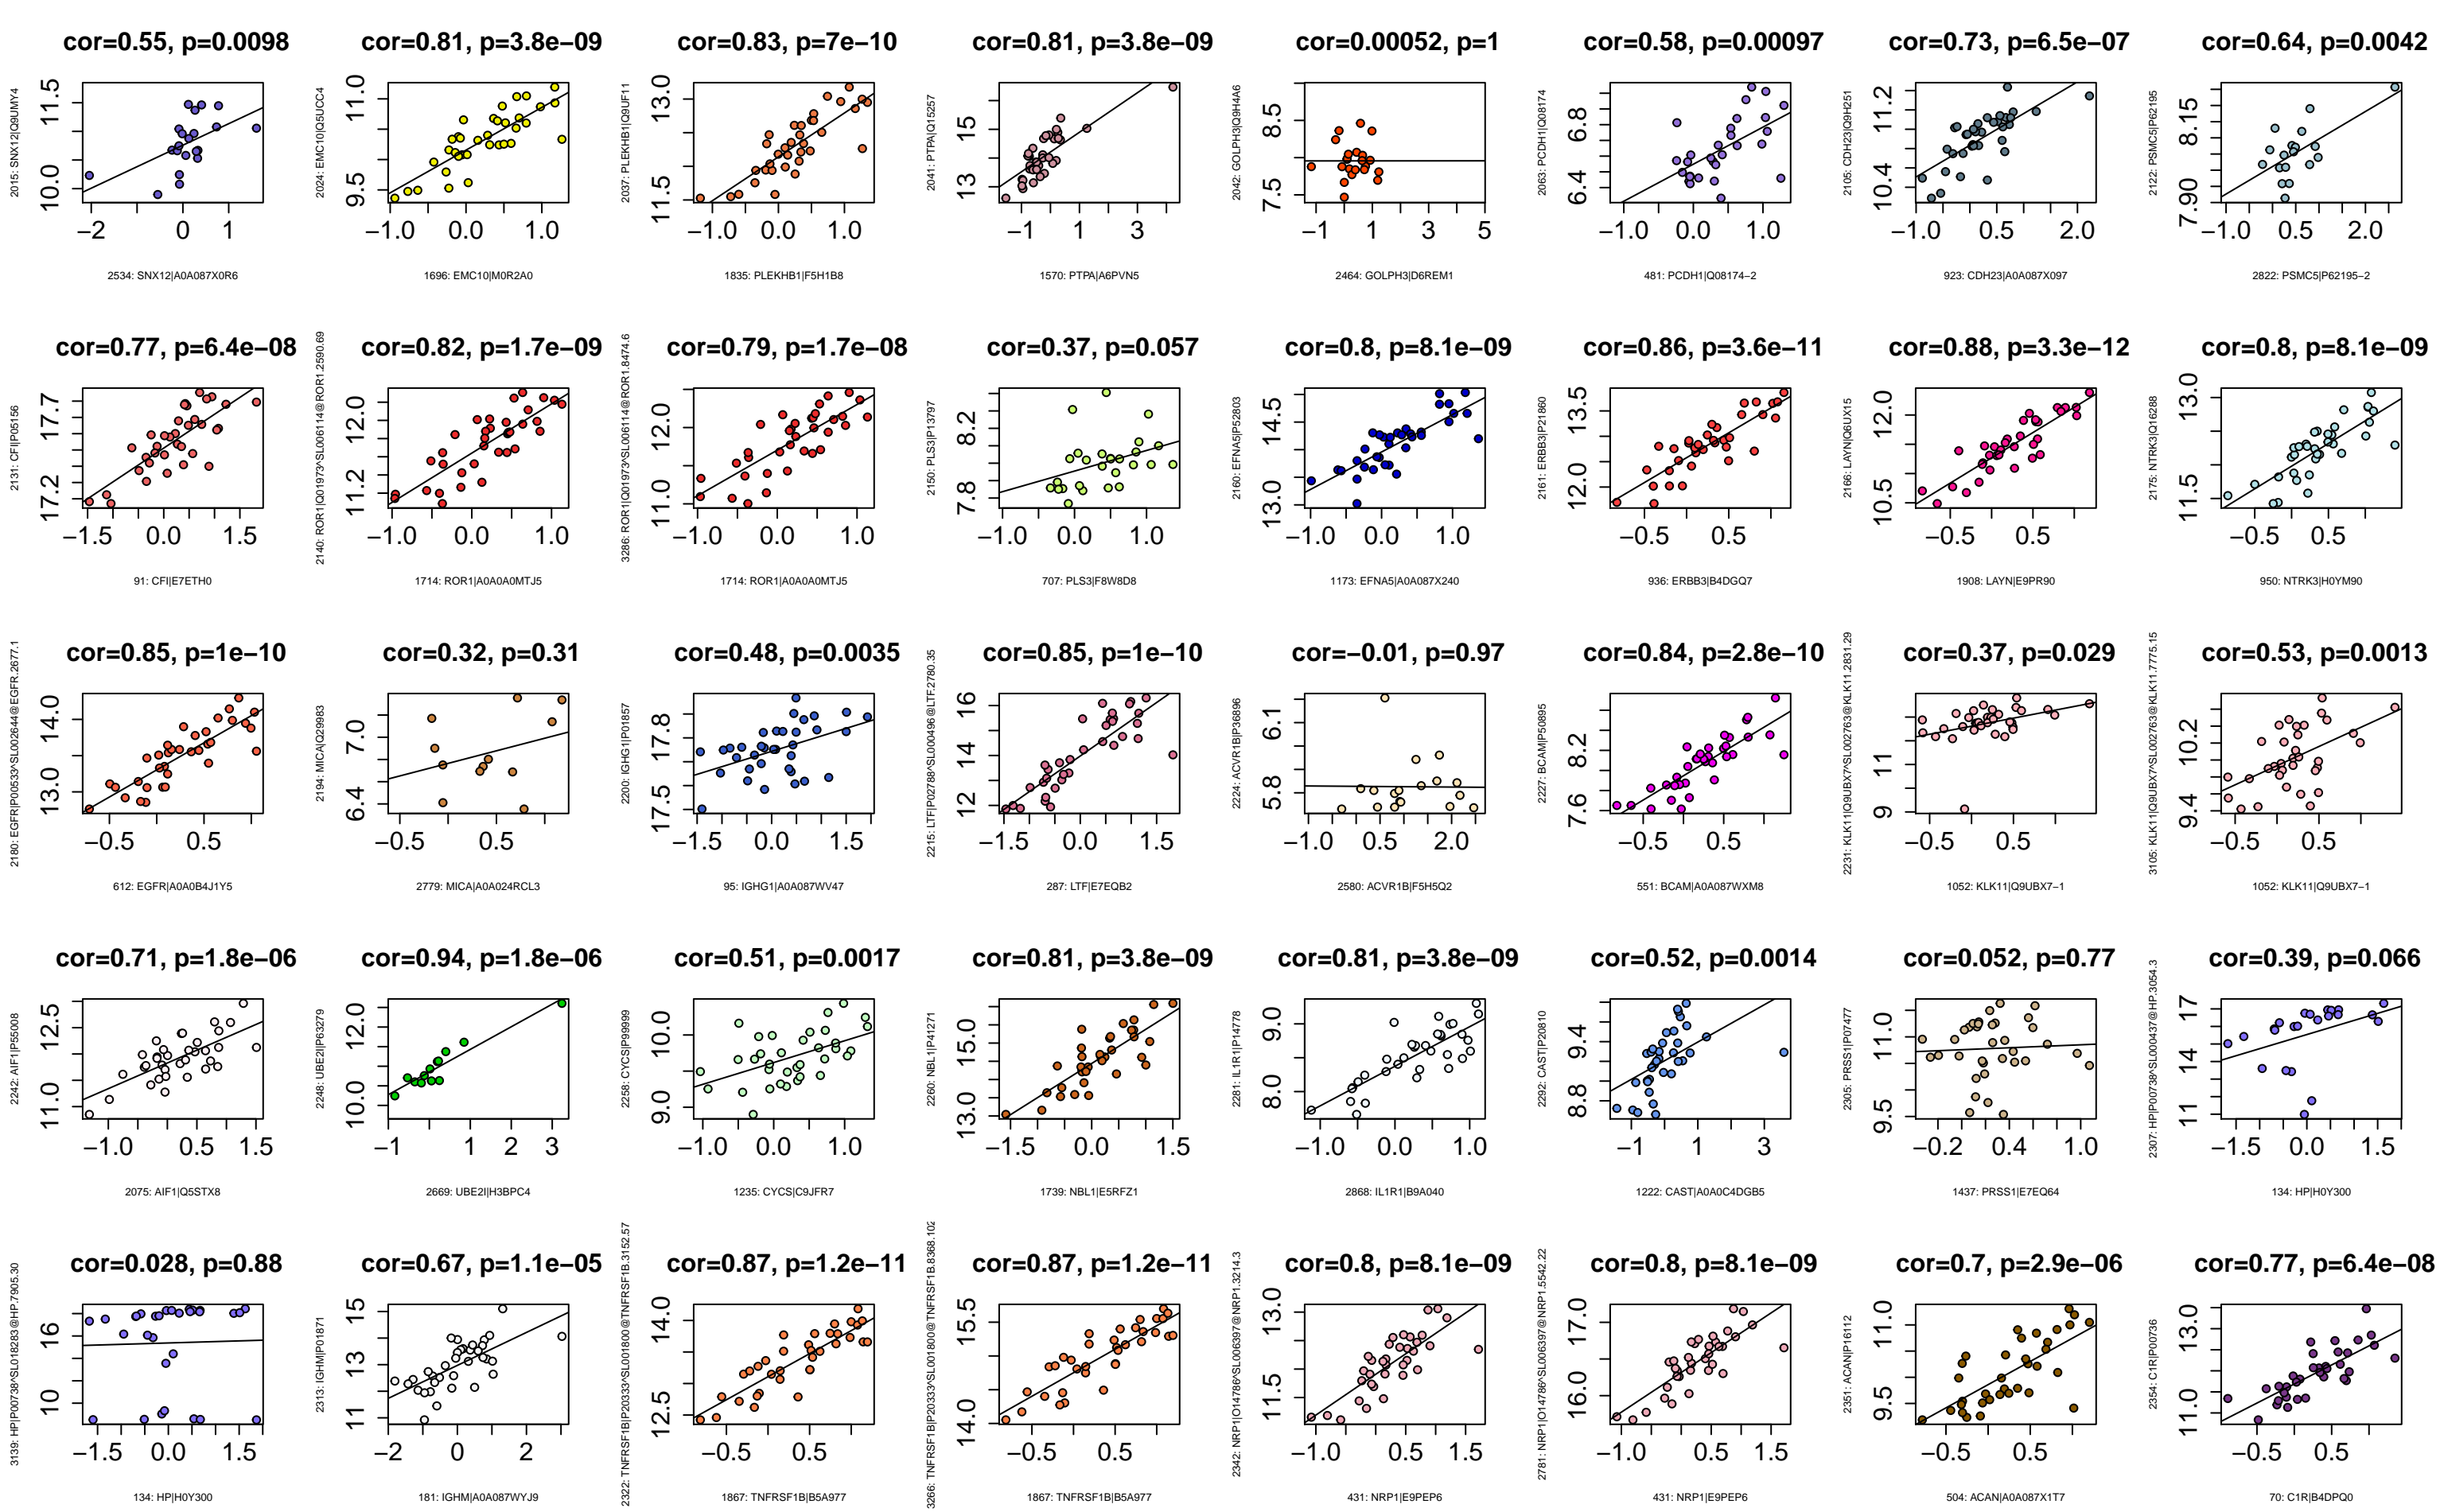

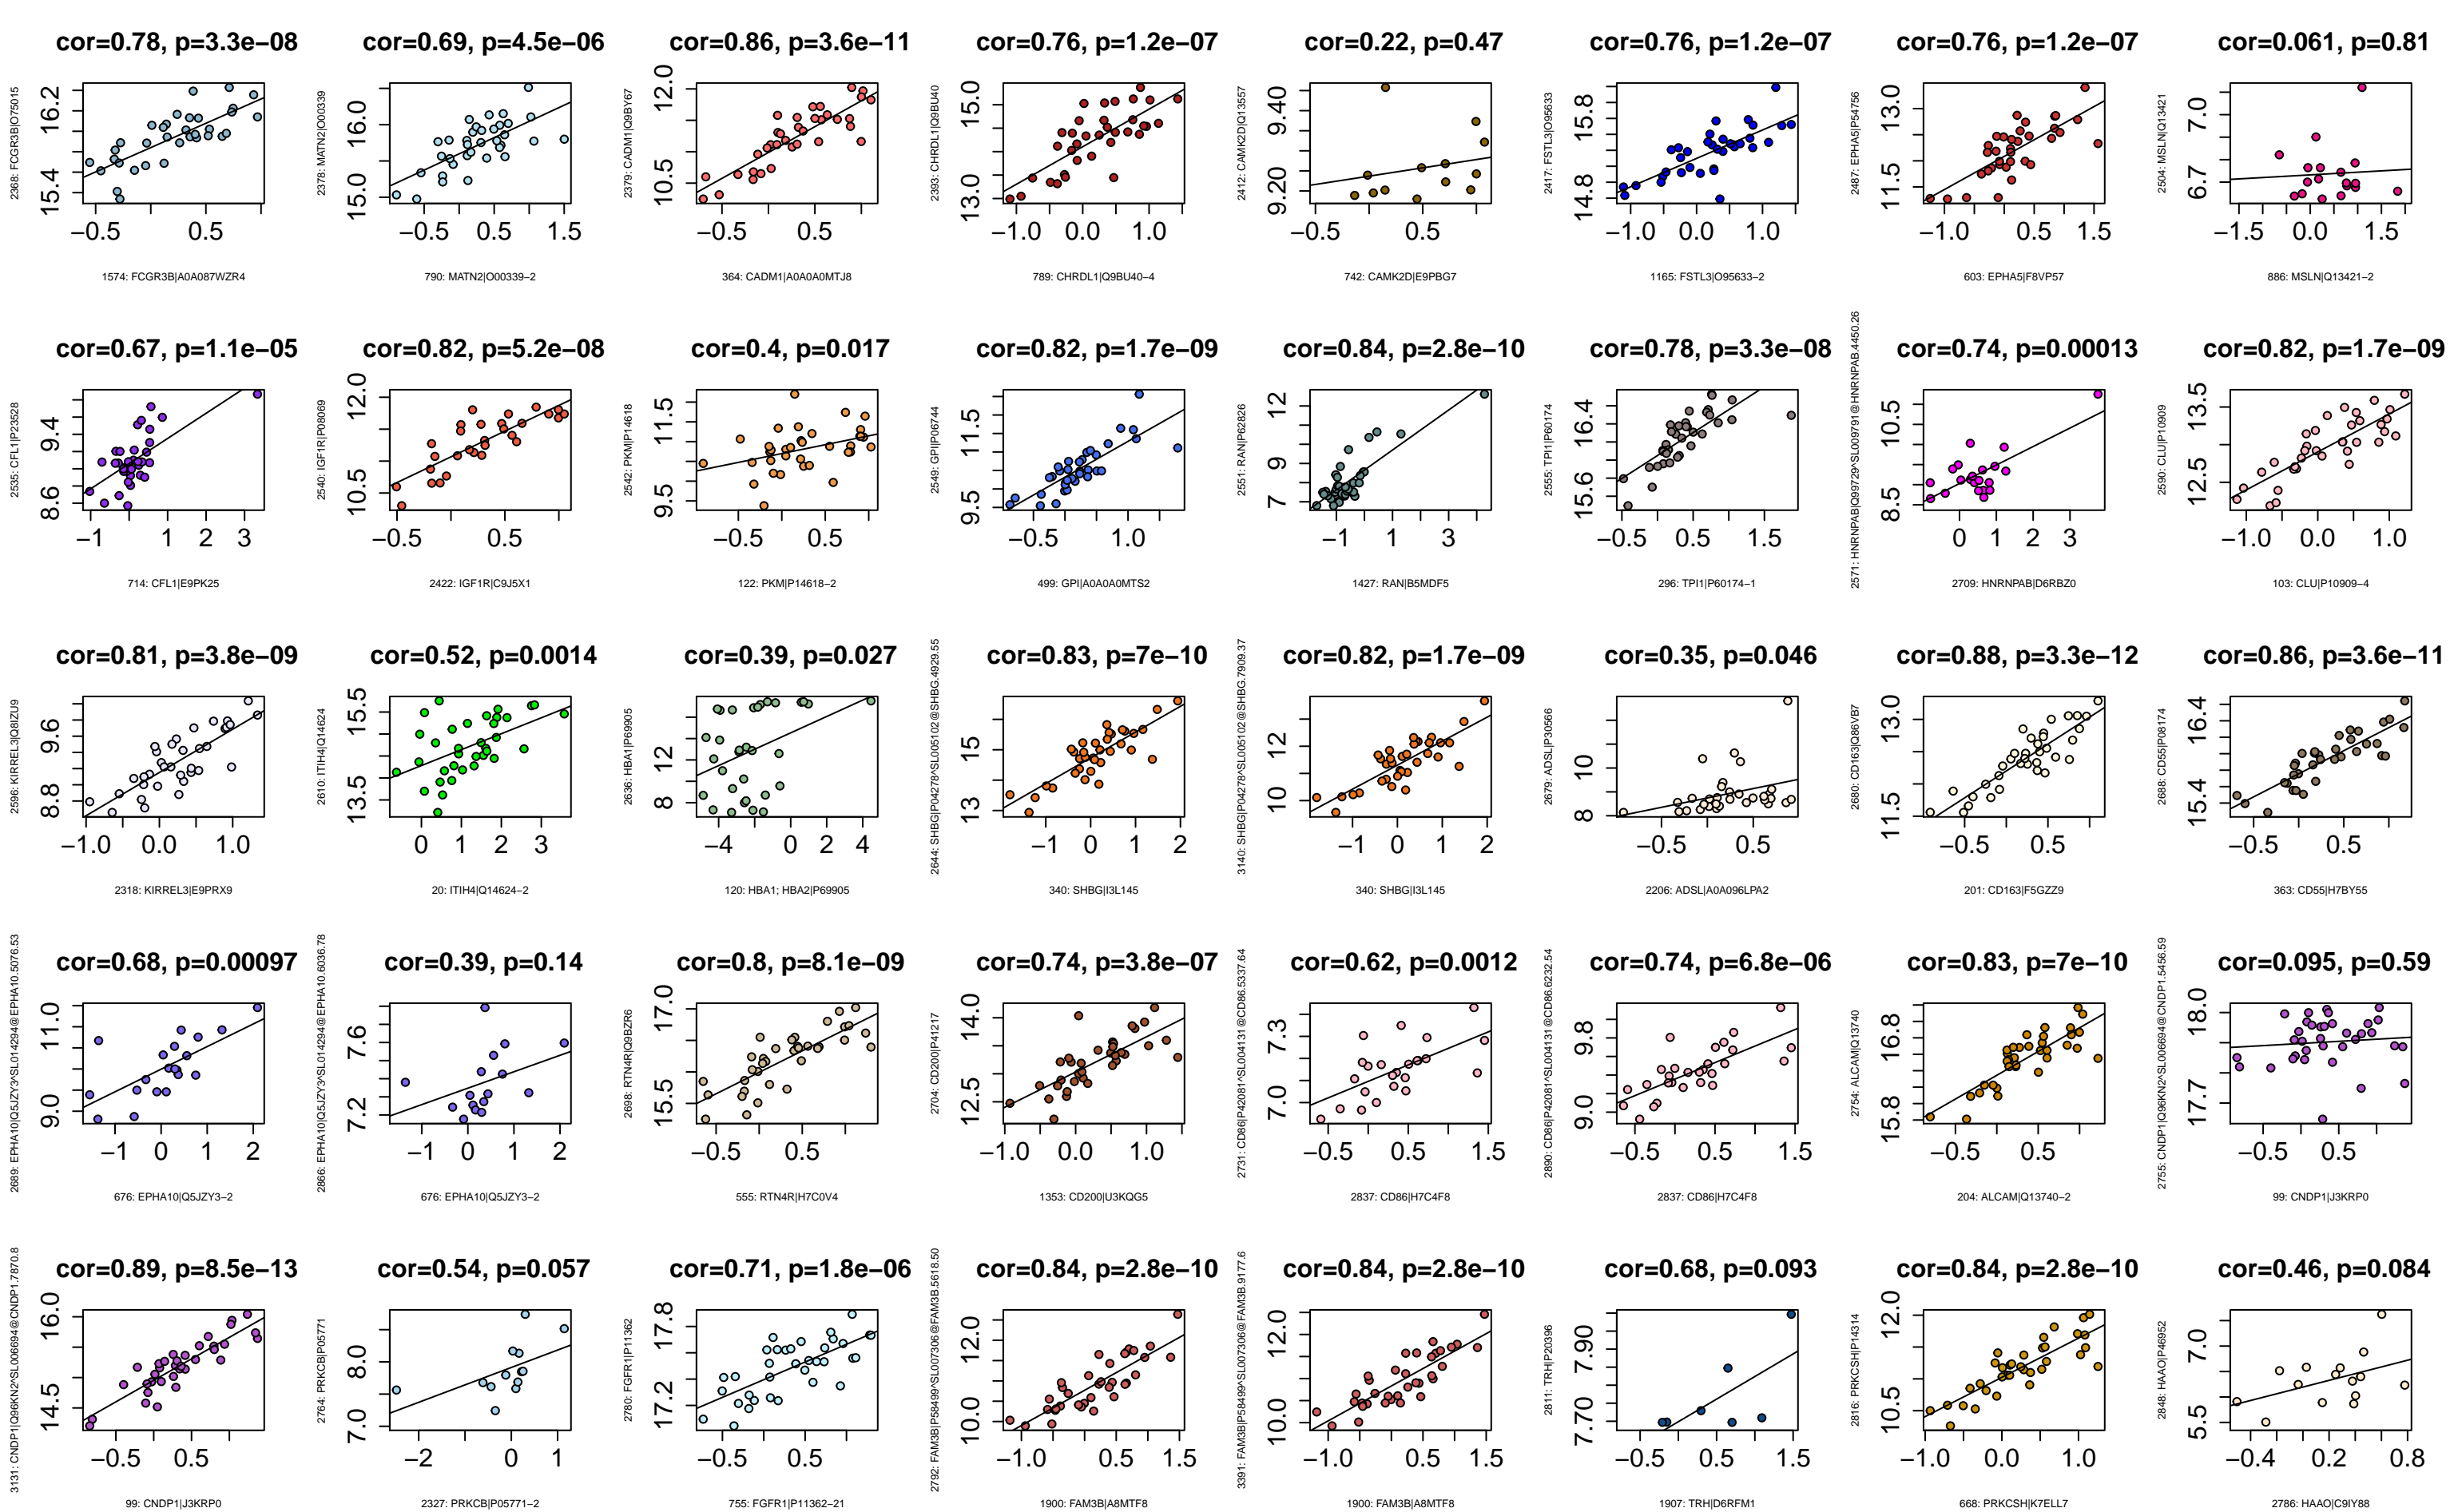

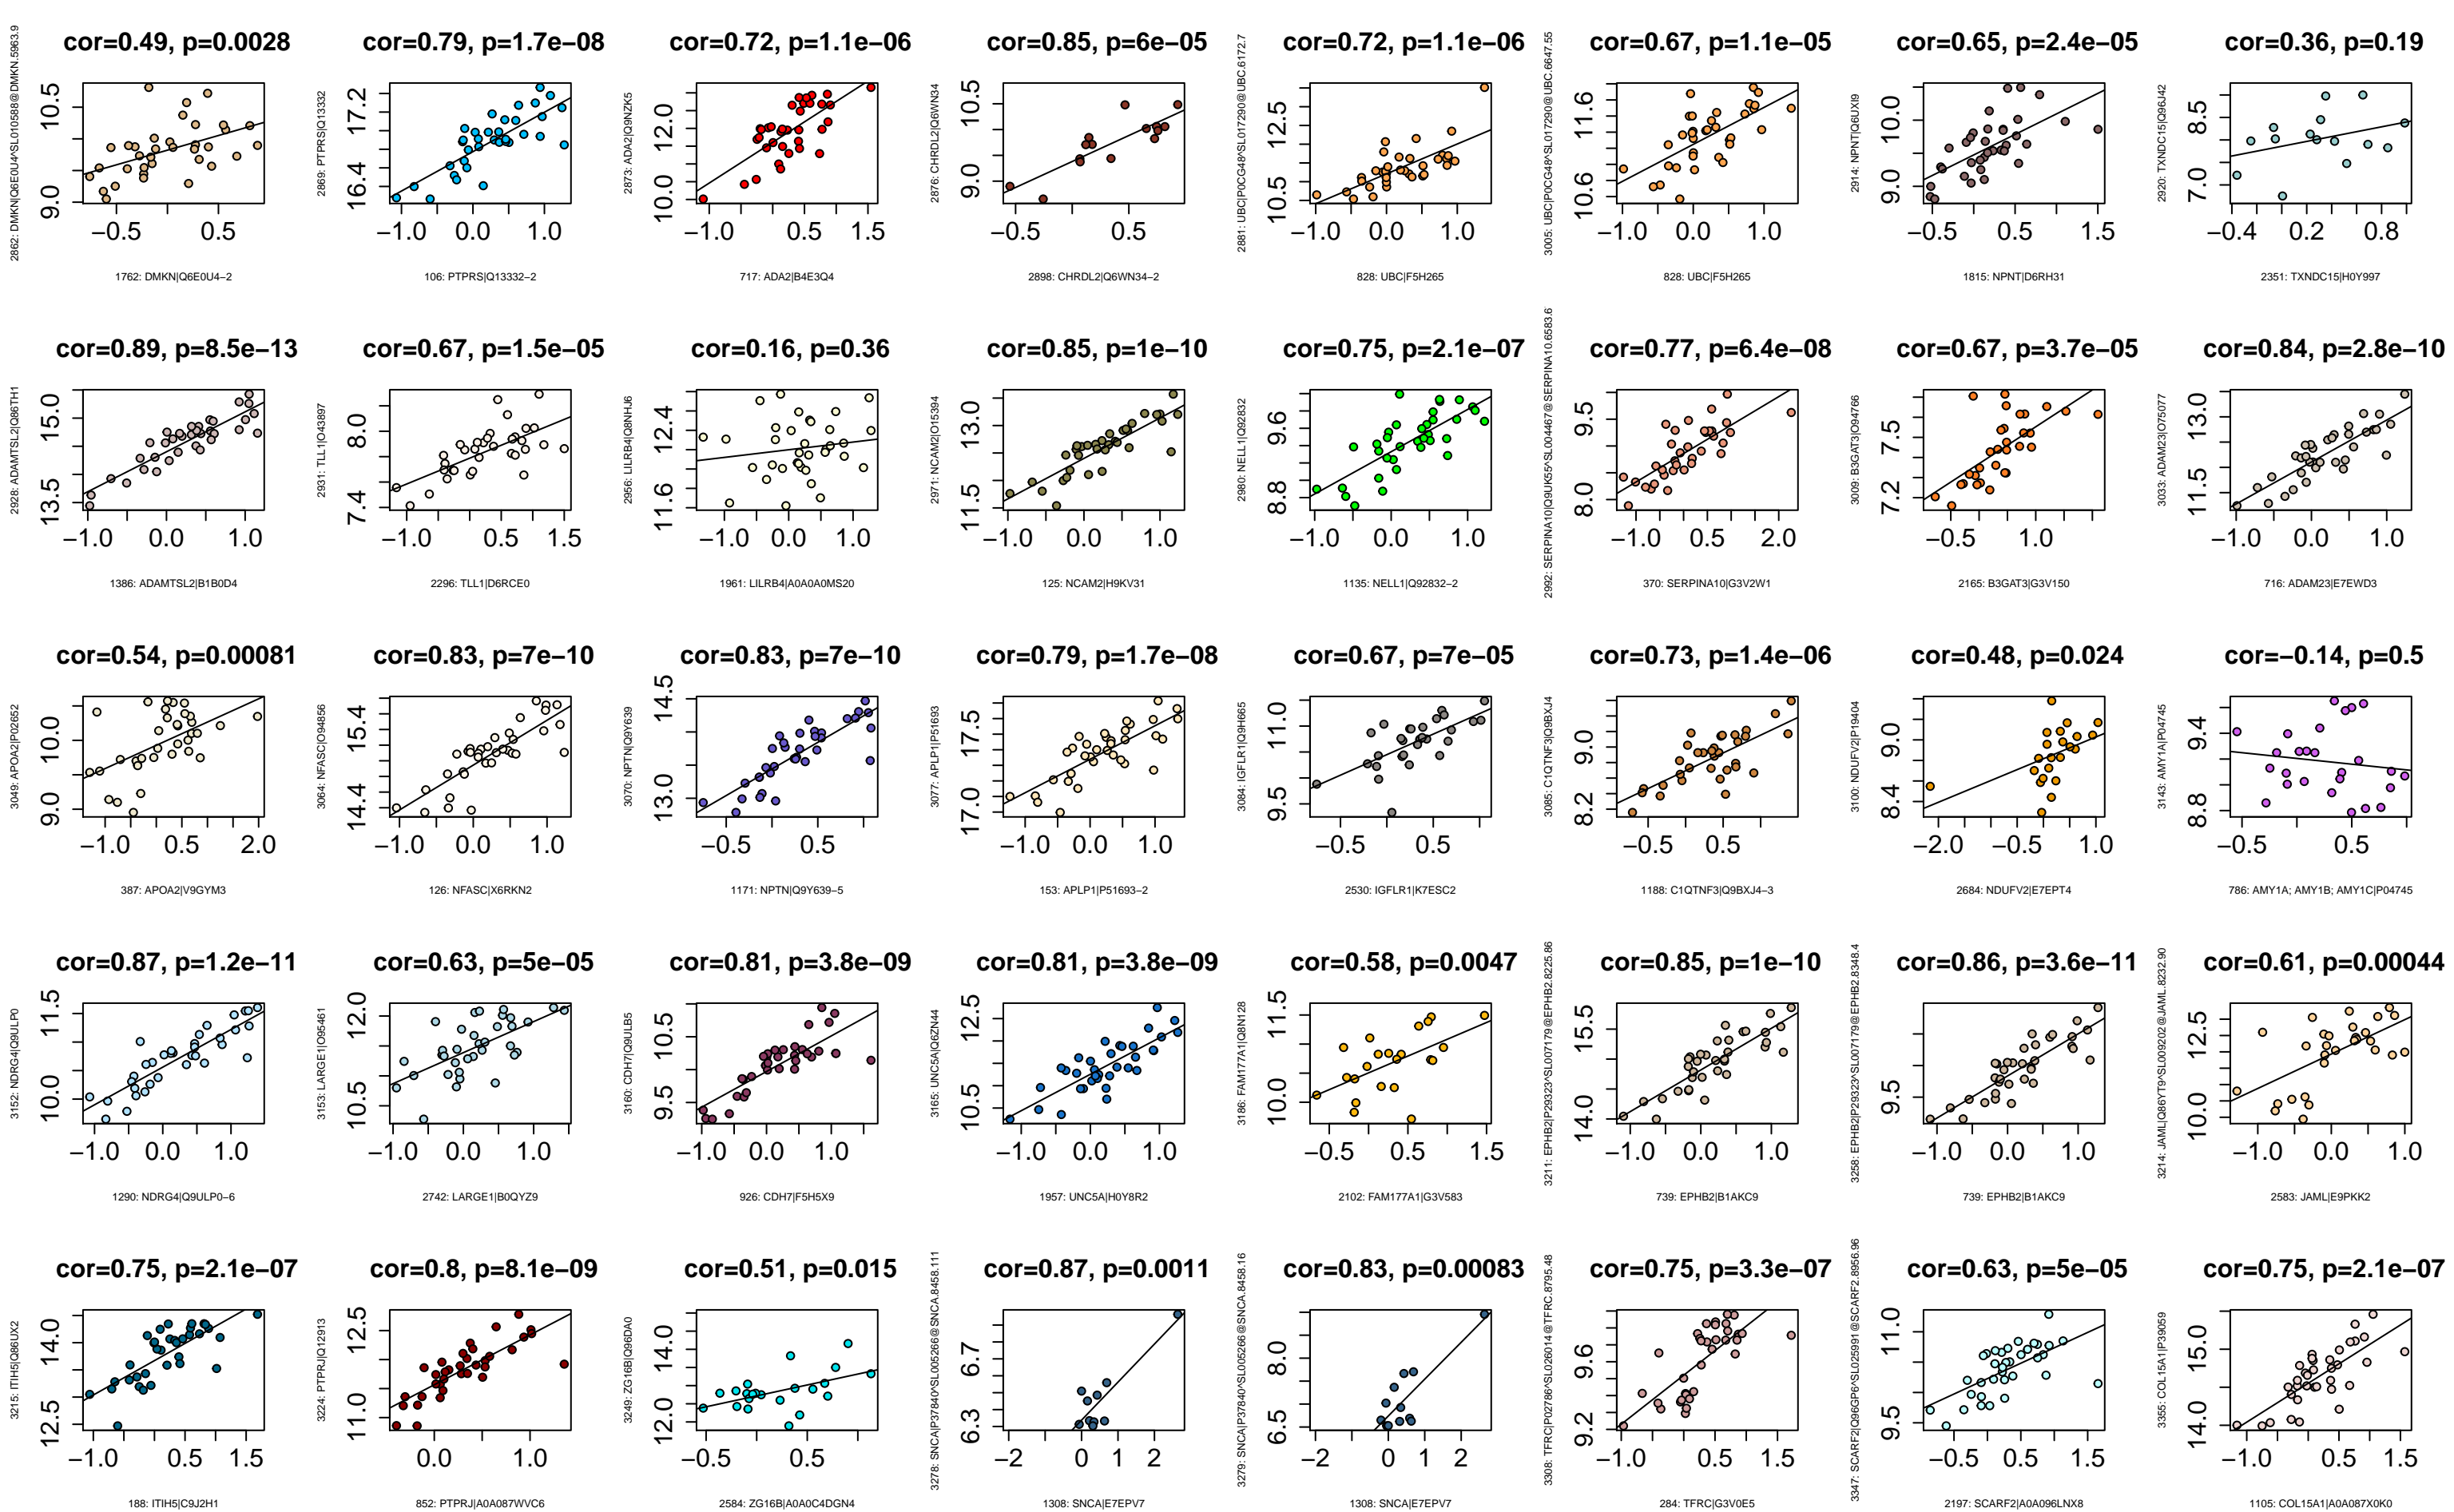

3366: TMEM25|Q68VD3

cor=-0.47, p=0.11

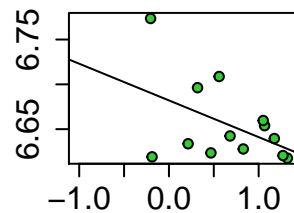

1785: TMEM25|E9PIE6

3397: CD63|P06962

cor=0.6, p=0.0085

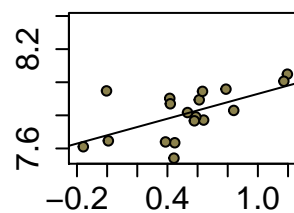

2816: CD63|F8VVK8

3399: LGALS7|P47929@SL005166@LGALS7.9196.8

cor=0.56, p=0.0016

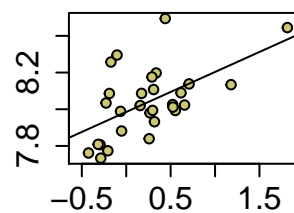

1693: LGALS7: LGALS7B|P47929

3424: DEFA1|P59665@SL004526@DEFA1.9250.87

cor=0.052, p=0.89

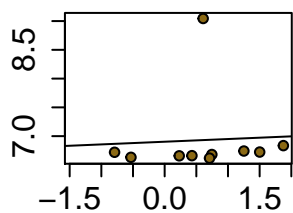

1912: DEFA1: DEFA1B|P59665

3444: PTPRD|P23468

cor=0.8, p=8.1e-09

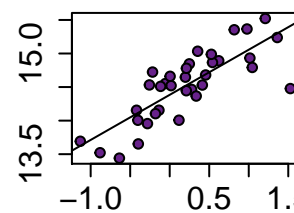

132: PTPRD|P23468-2

3464: DLK2|Q6UY11

cor=0.75, p=2.1e-07

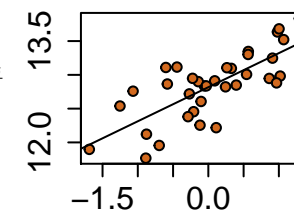

1765: DLK2|Q5T3T9

3525: YBX1|P67809

cor=-0.17, p=0.44

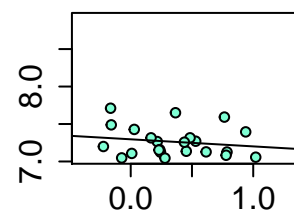

2144: YBX1|H0Y449

3542: CELF|P19835

cor=0.81, p=3.8e-09

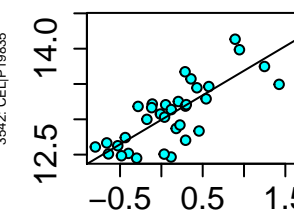

1061: CELF|X6R868

3556: ACTN2|P35609

cor=-0.045, p=0.85

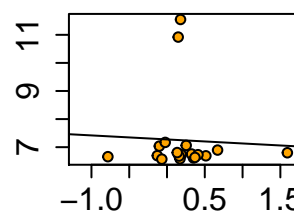

705: ACTN2|P35609-2

3585: PCDHB10|Q9UN67

cor=-1, p=NaN

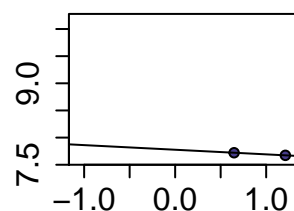

1608: PCDHB10|A0A0A0MTM6

3591: NPW|Q8NT29

cor=0.46, p=0.014

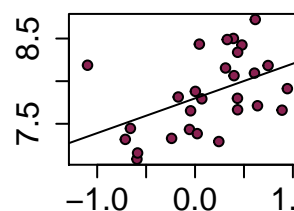

2690: NPW|H3BT17

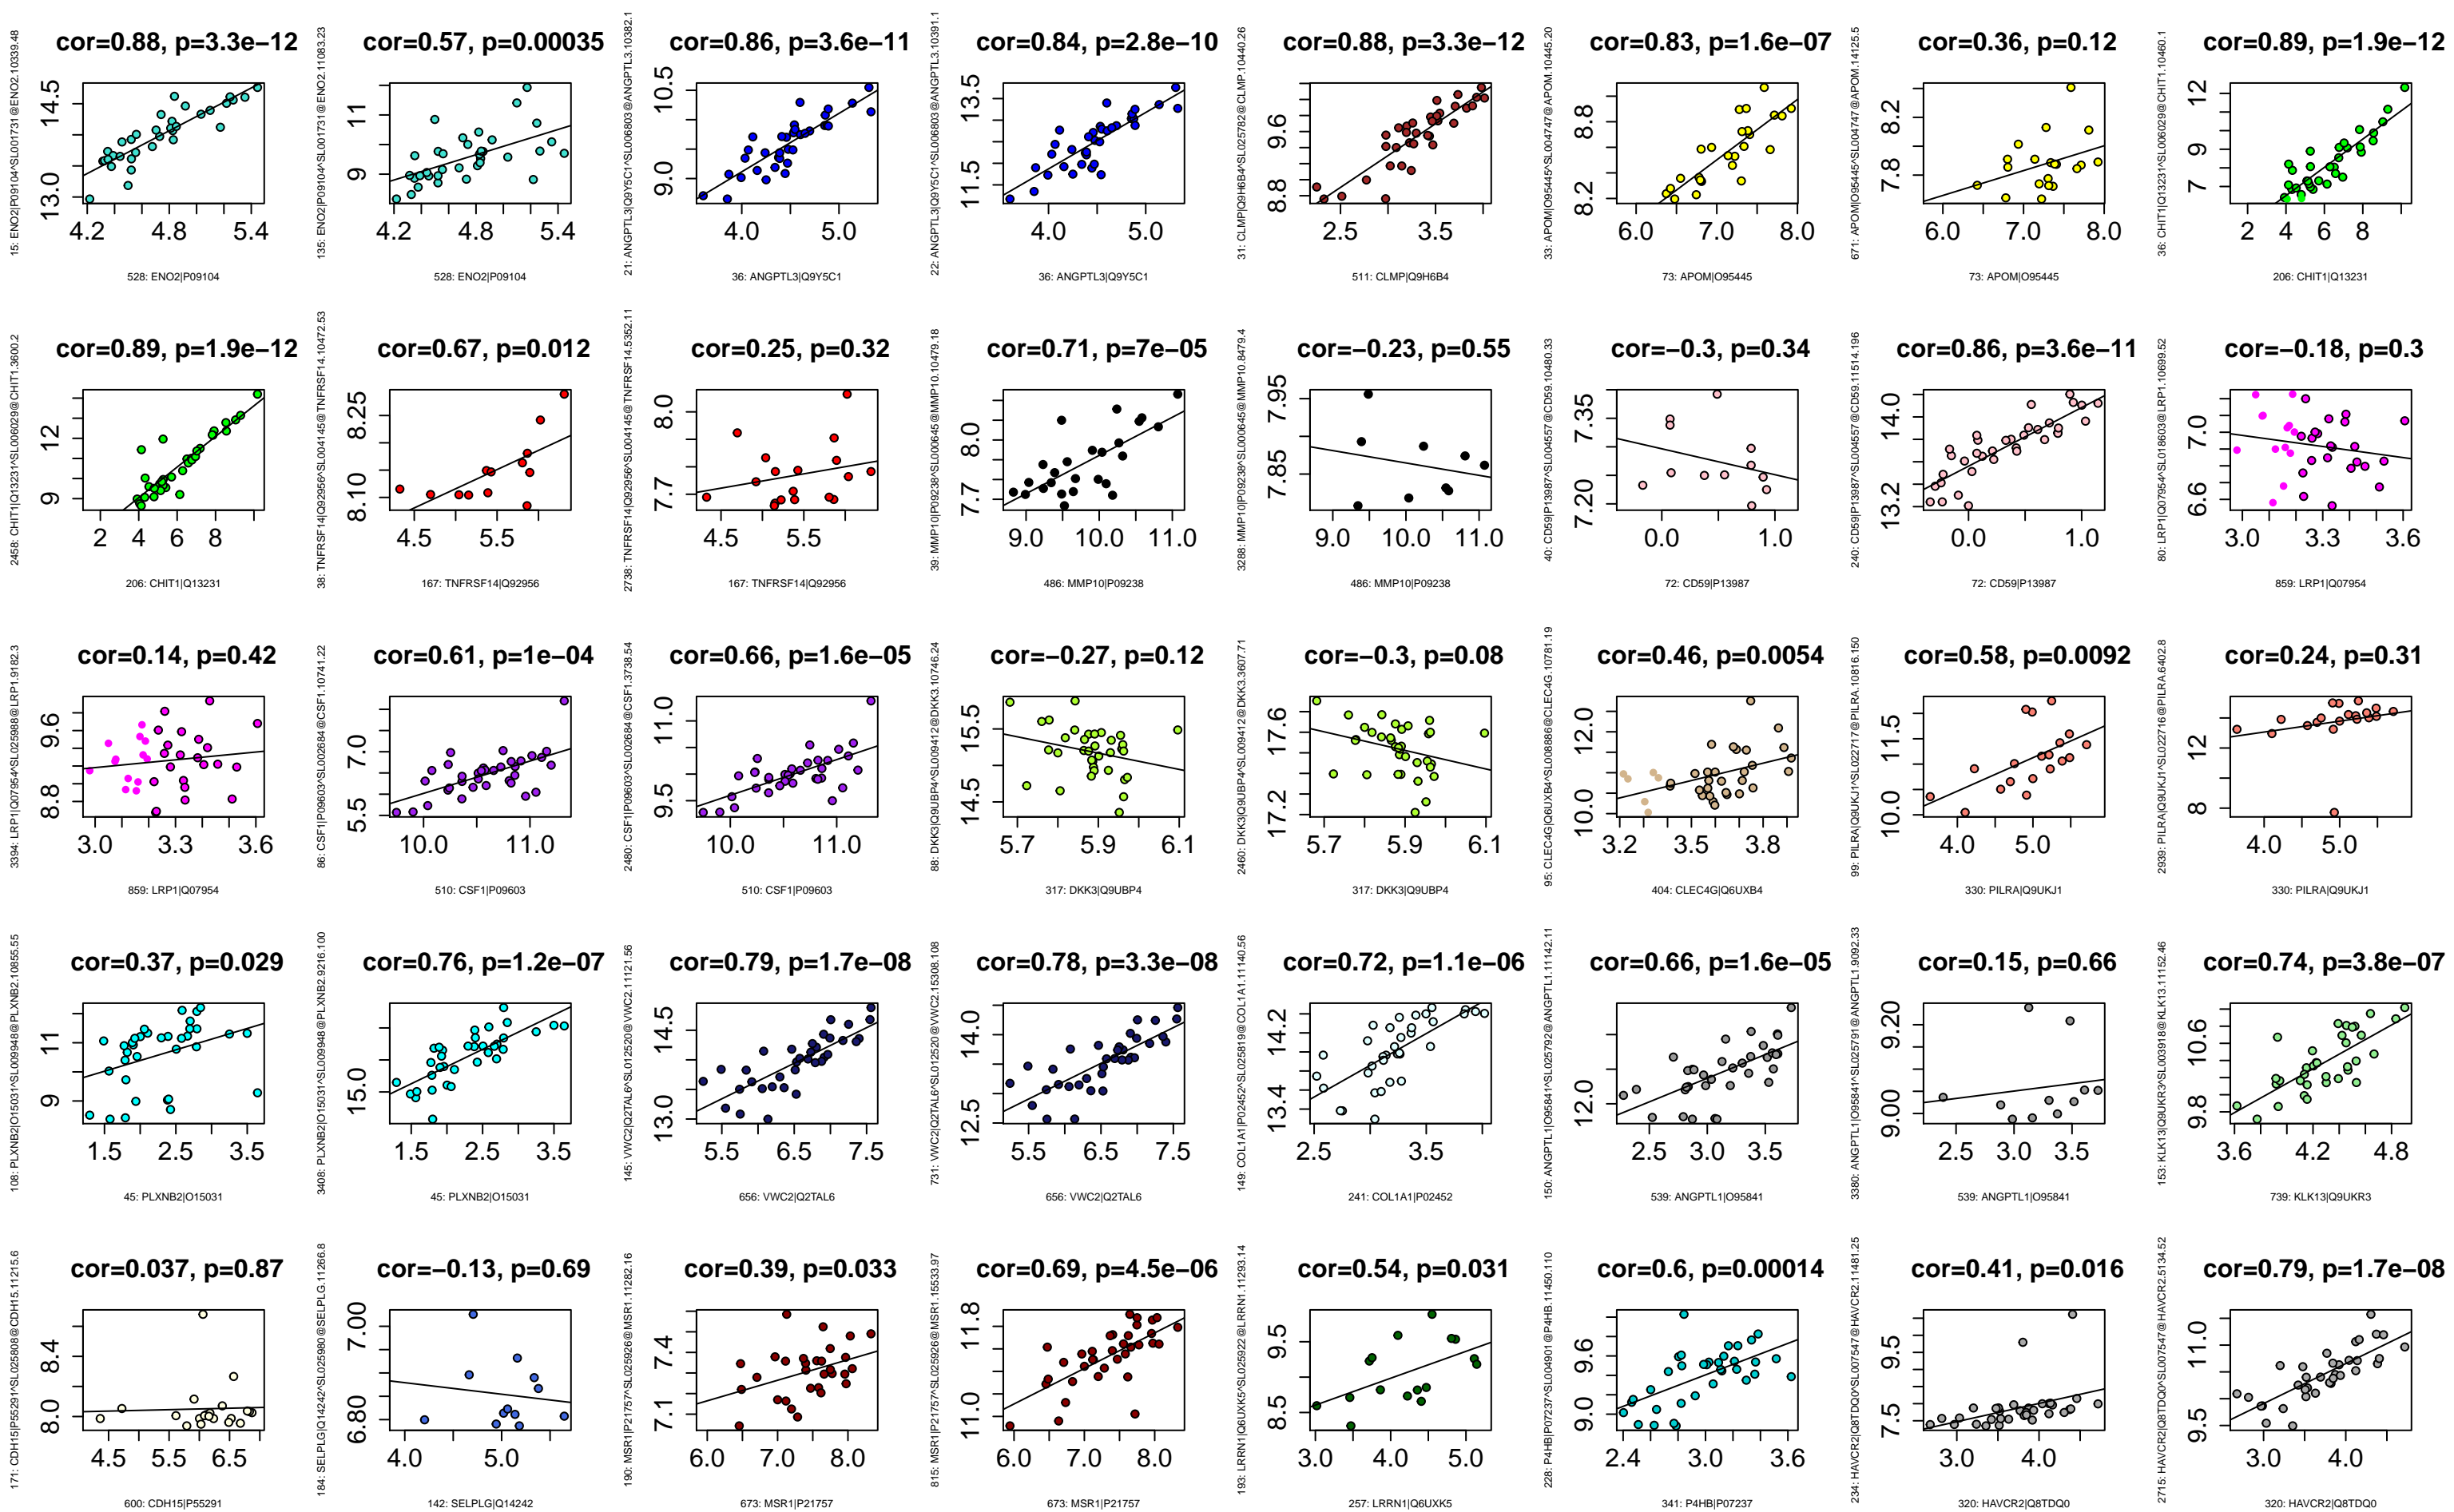

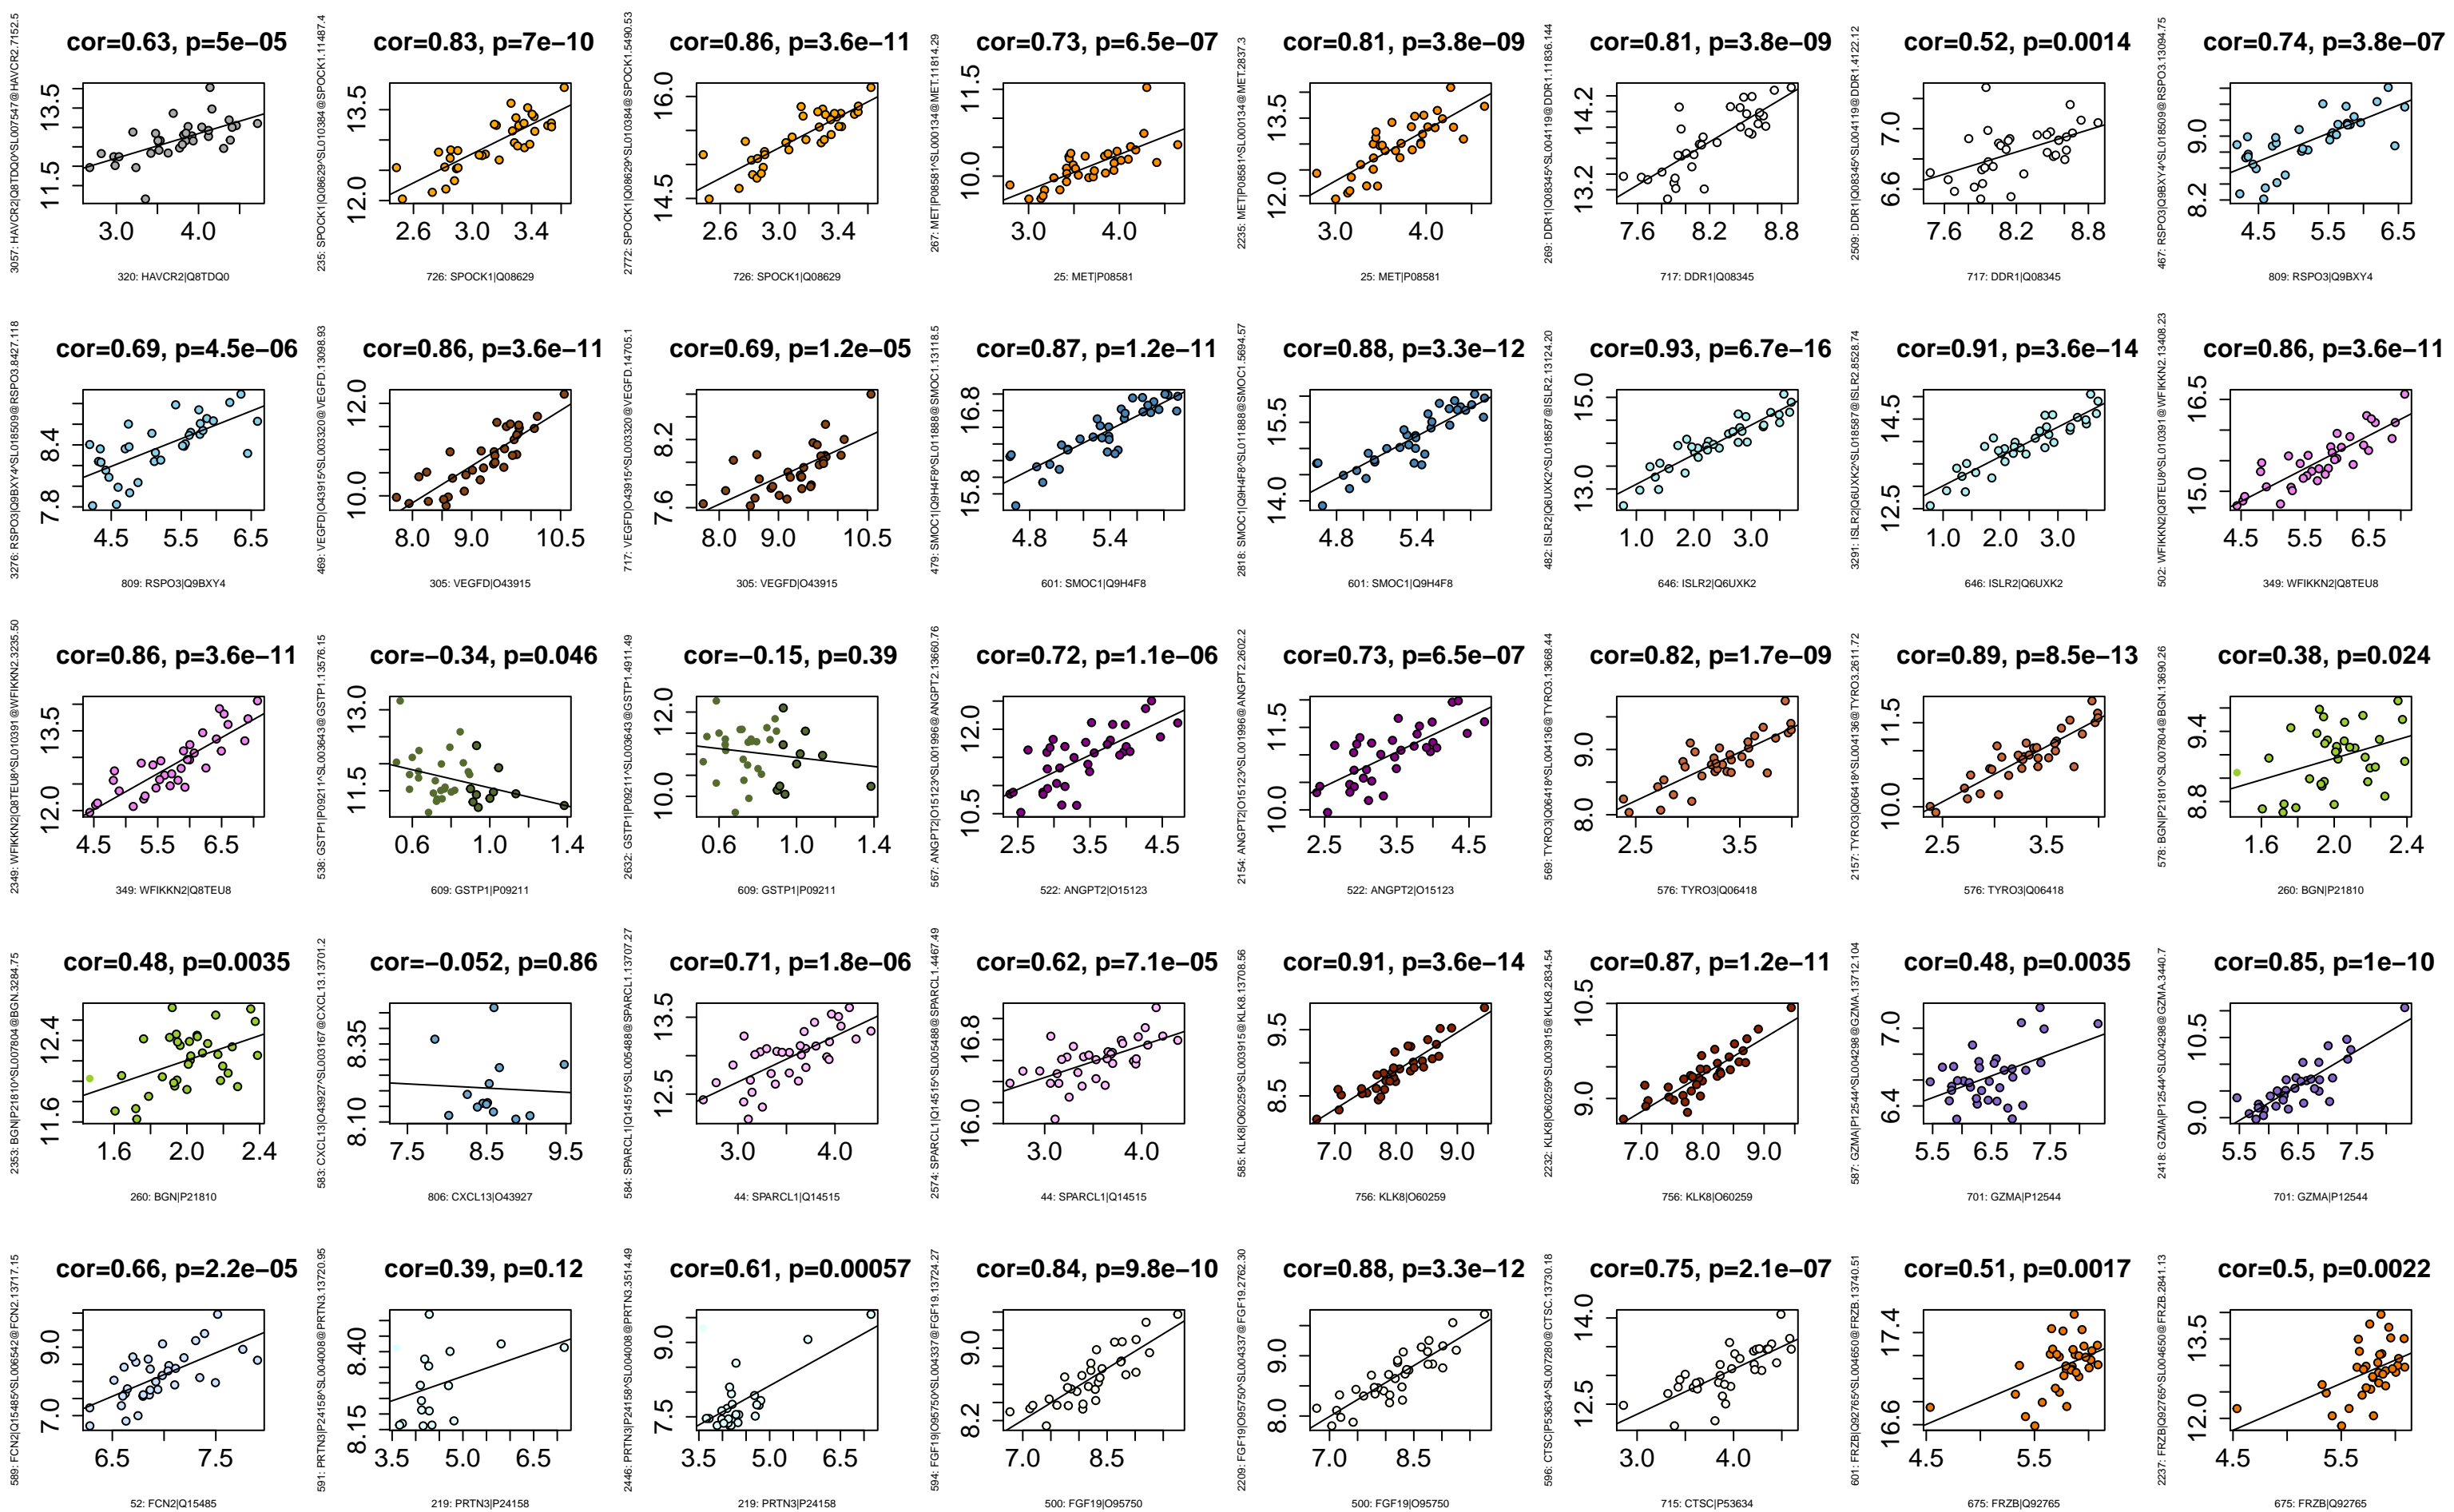

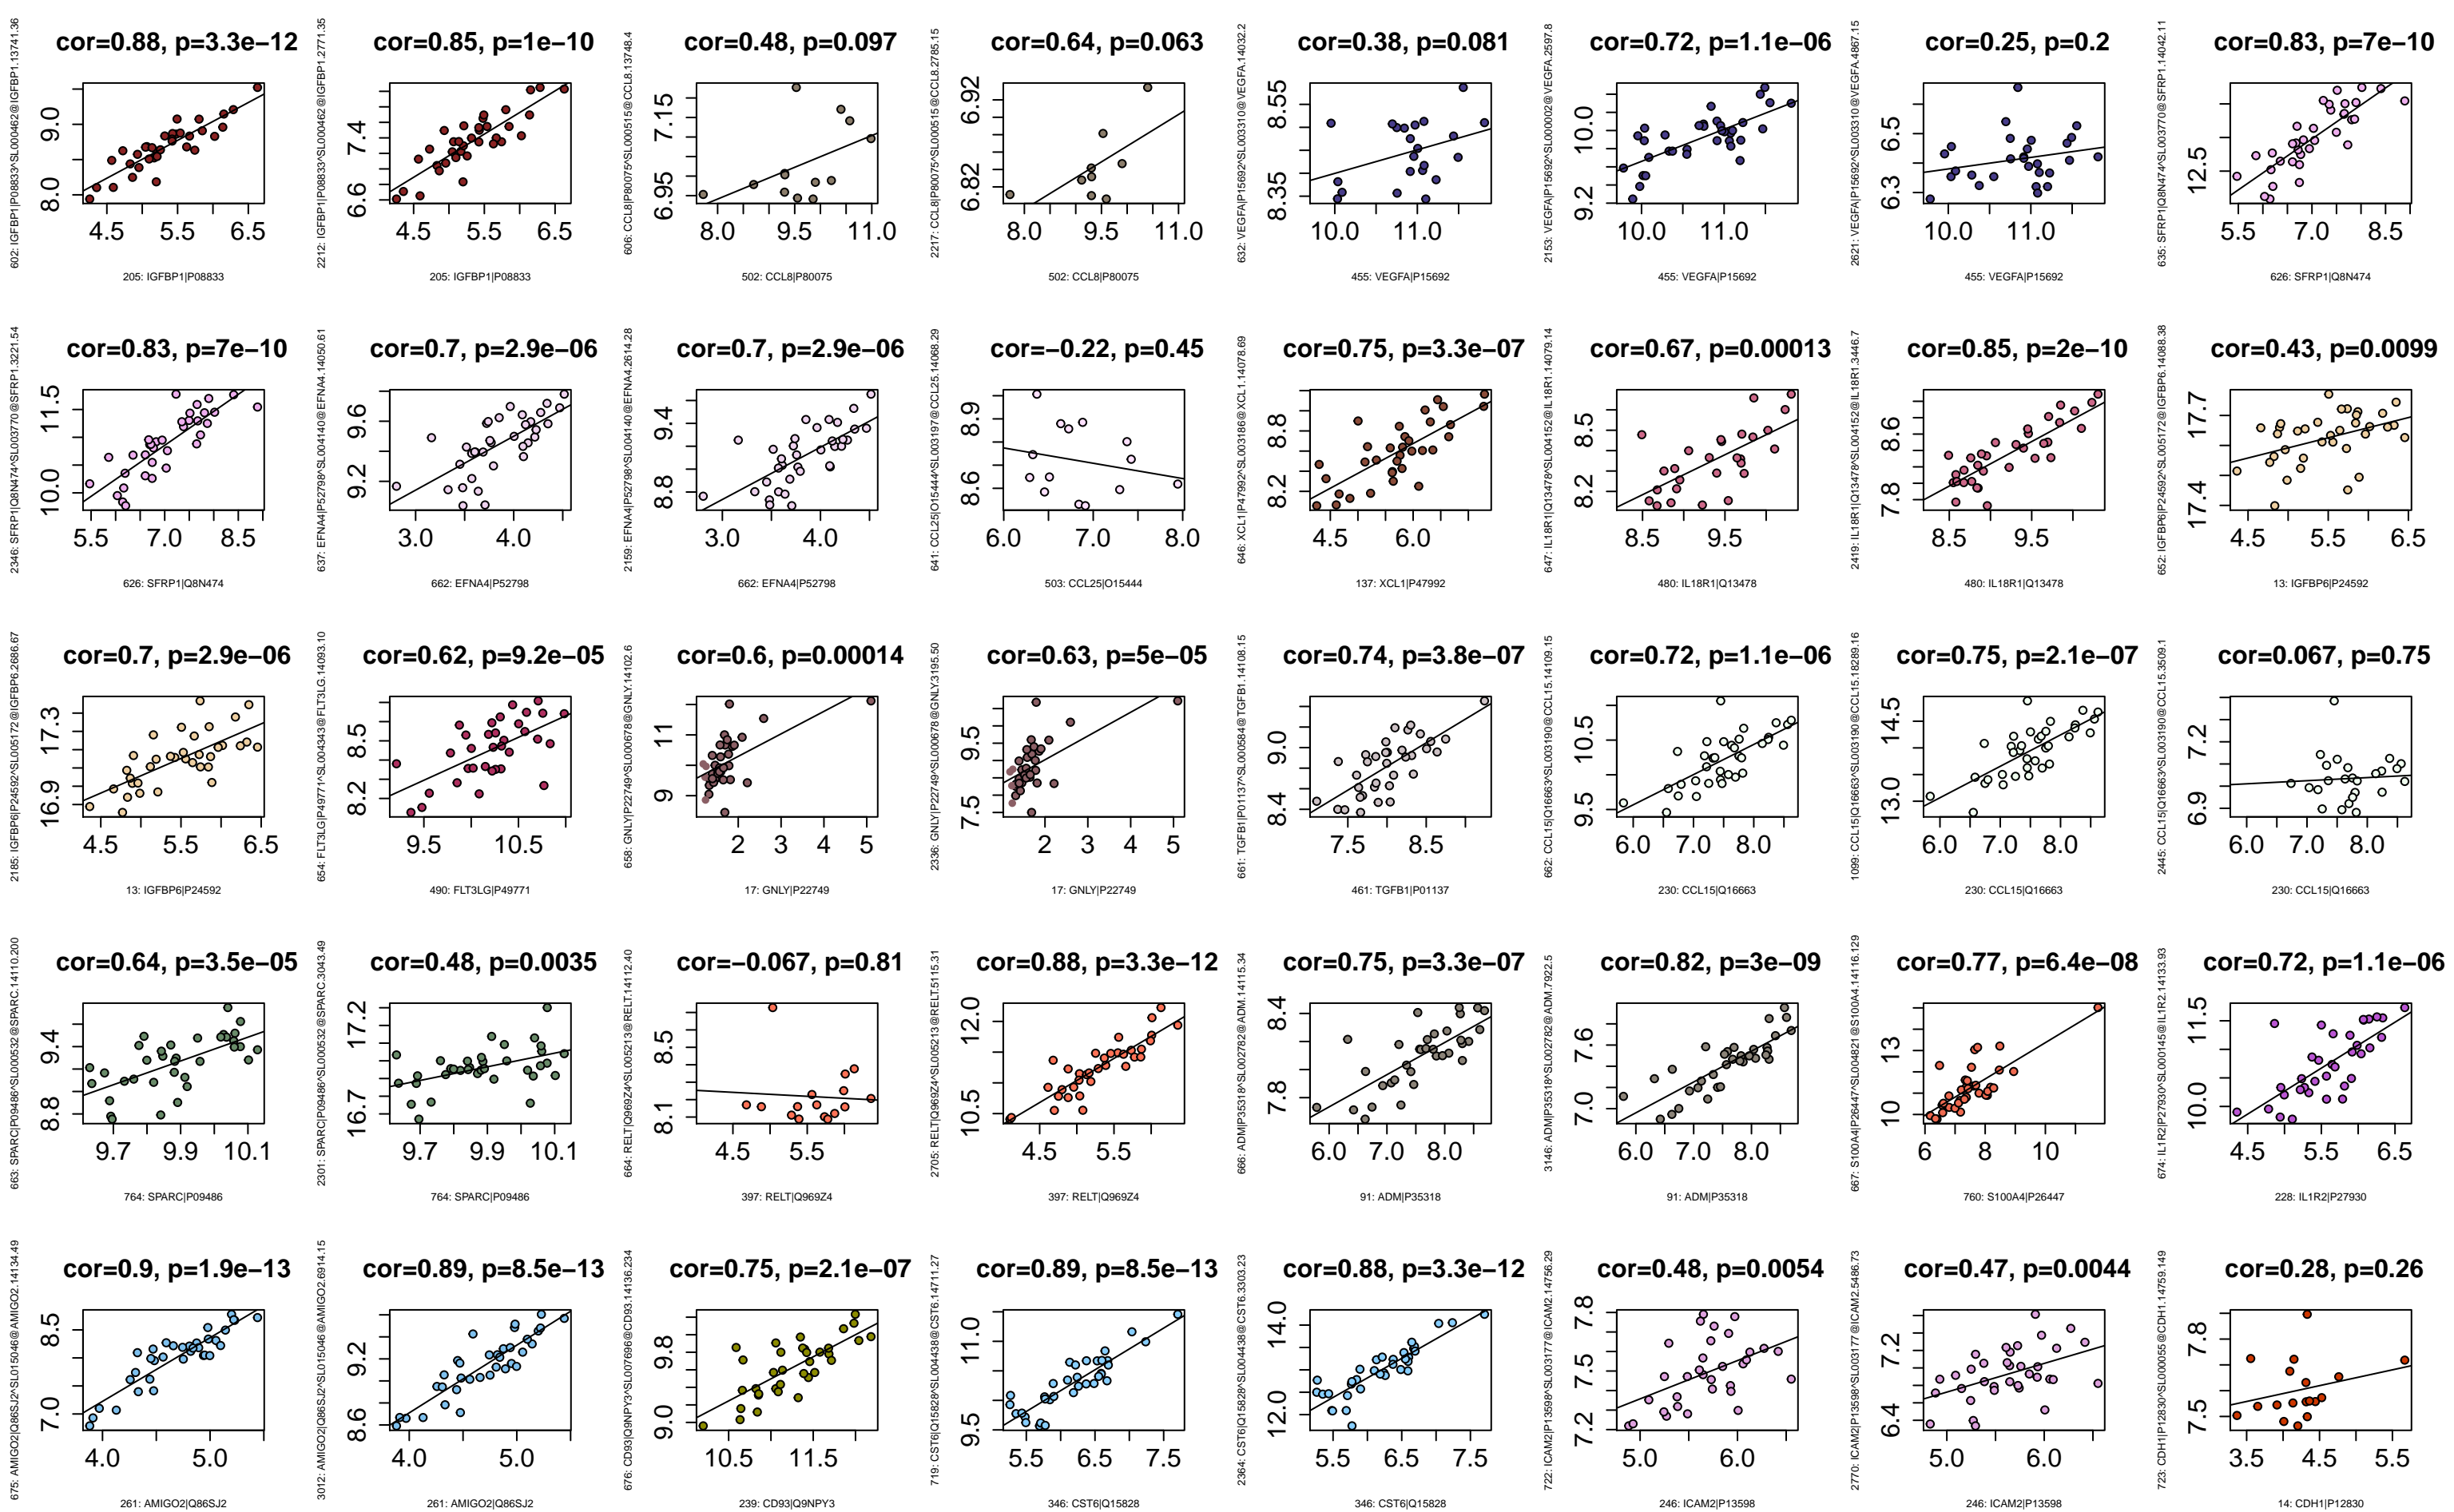



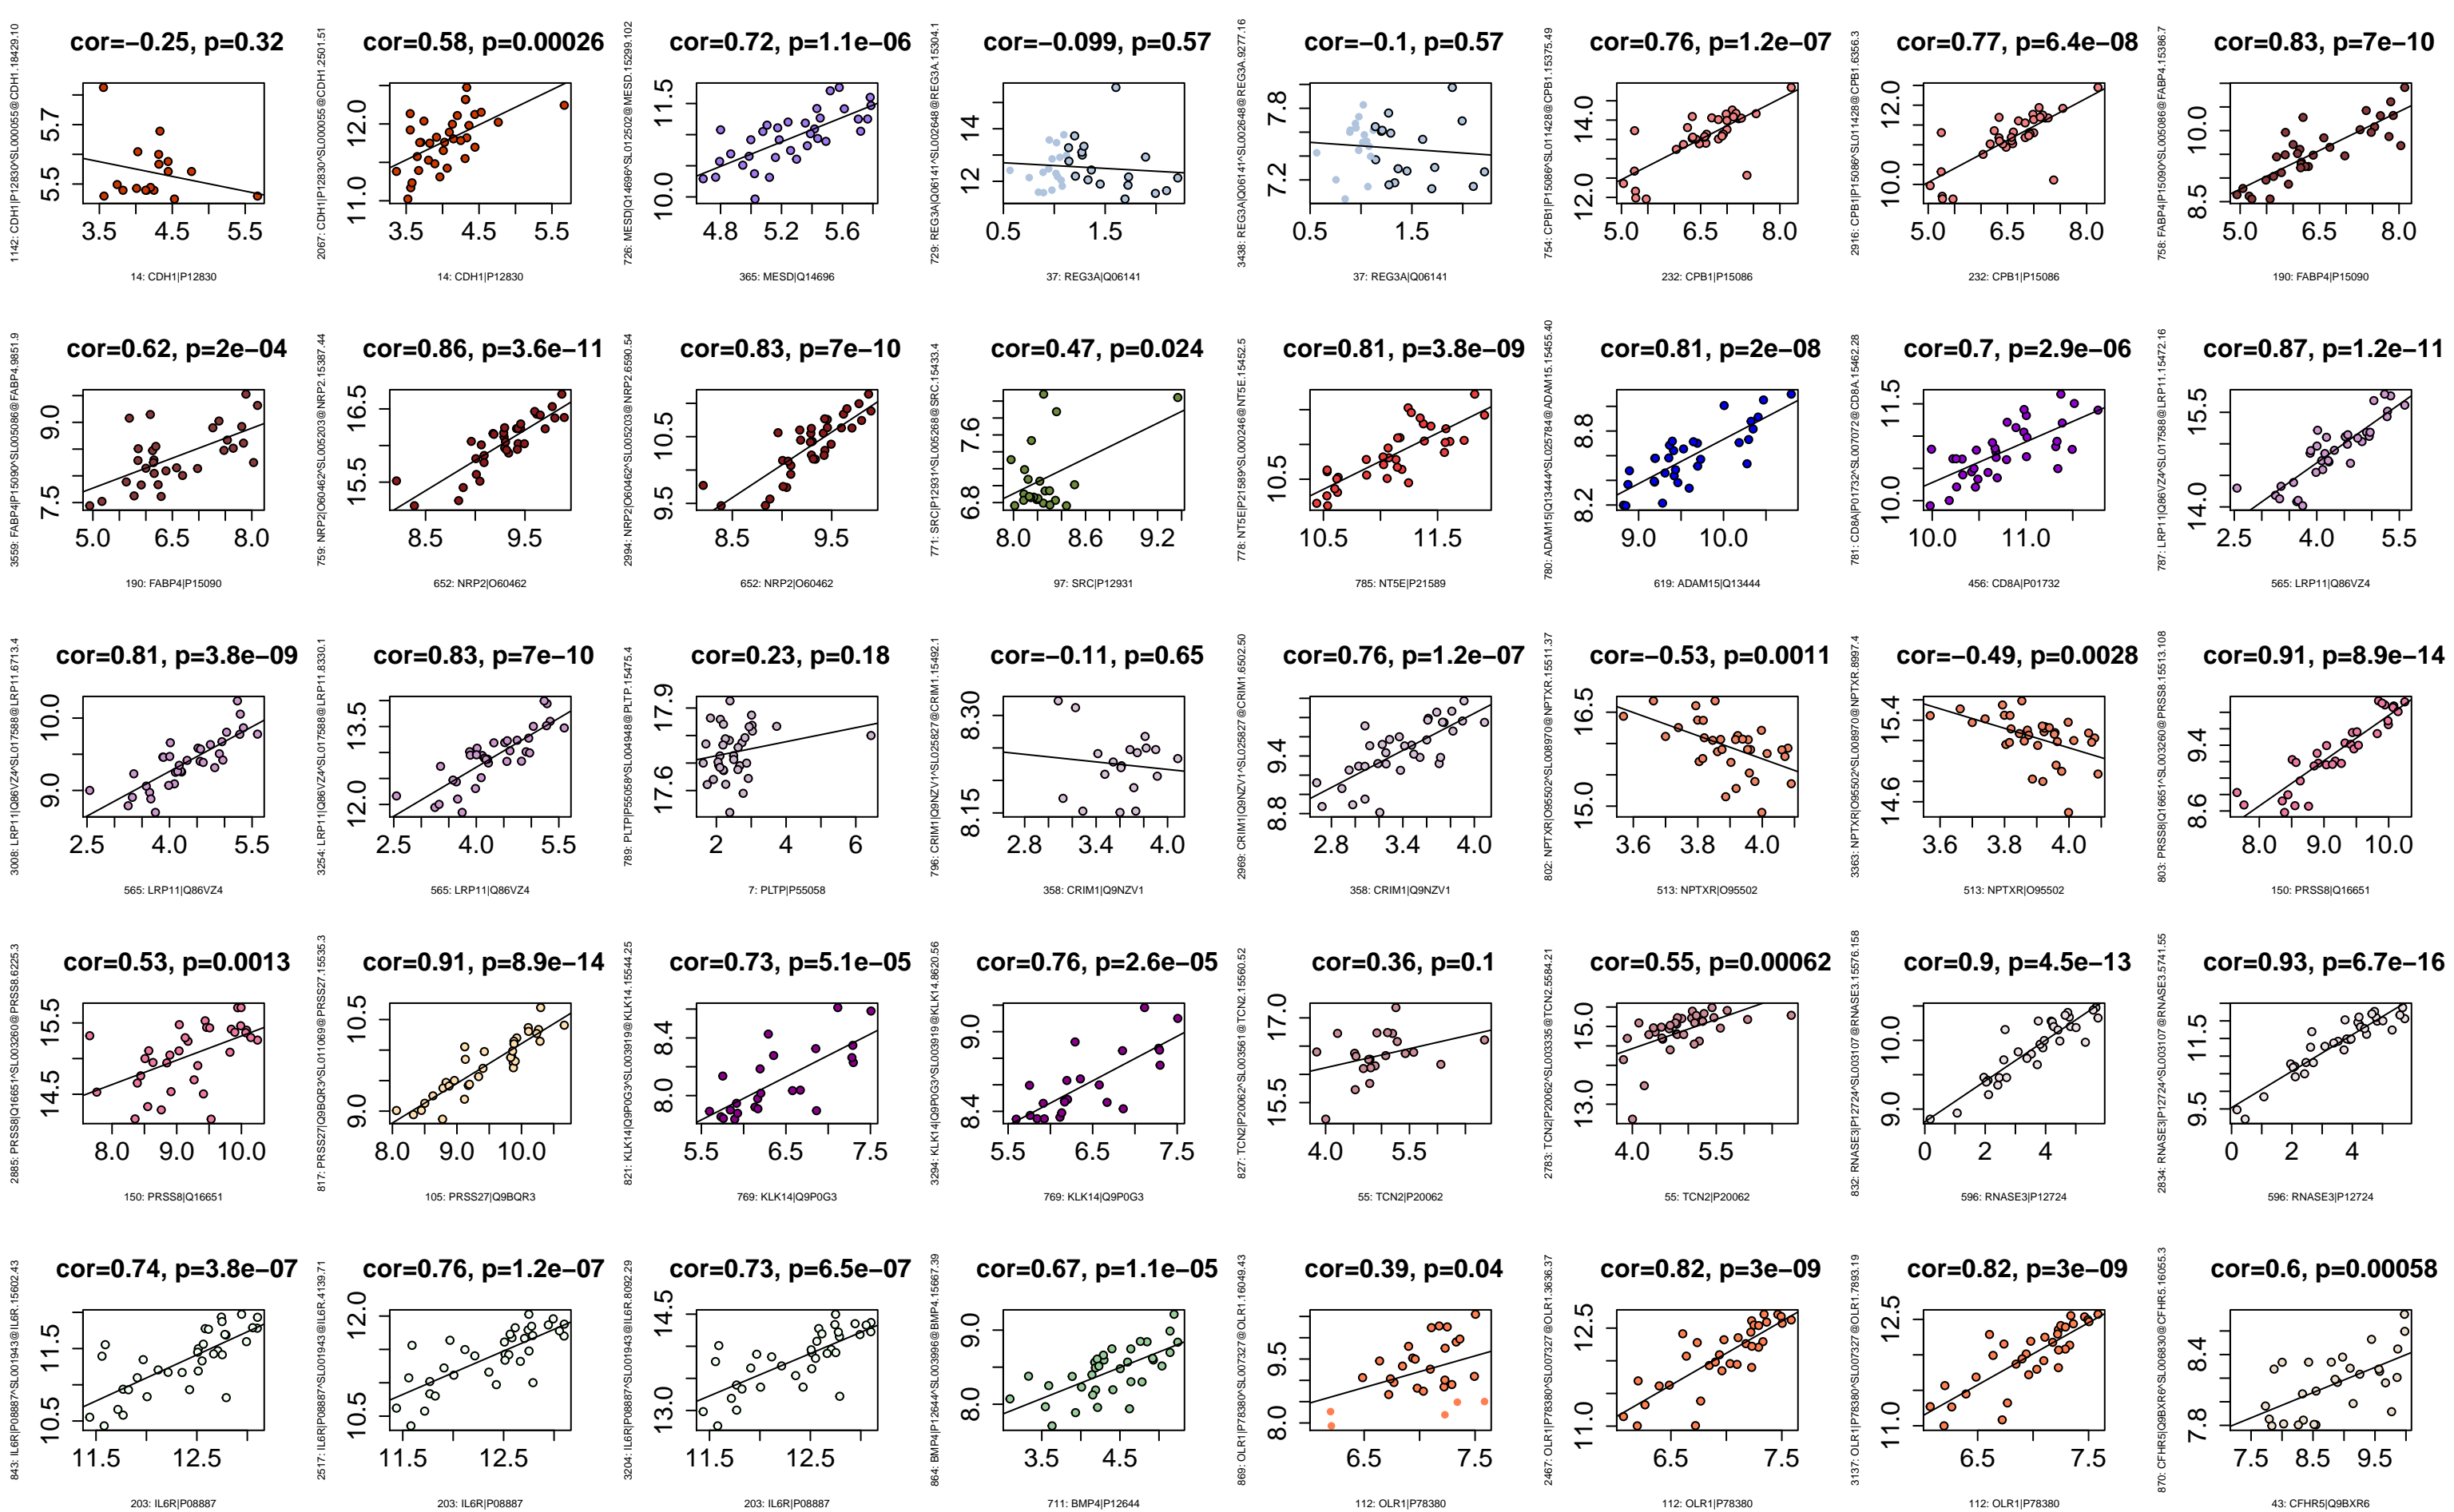

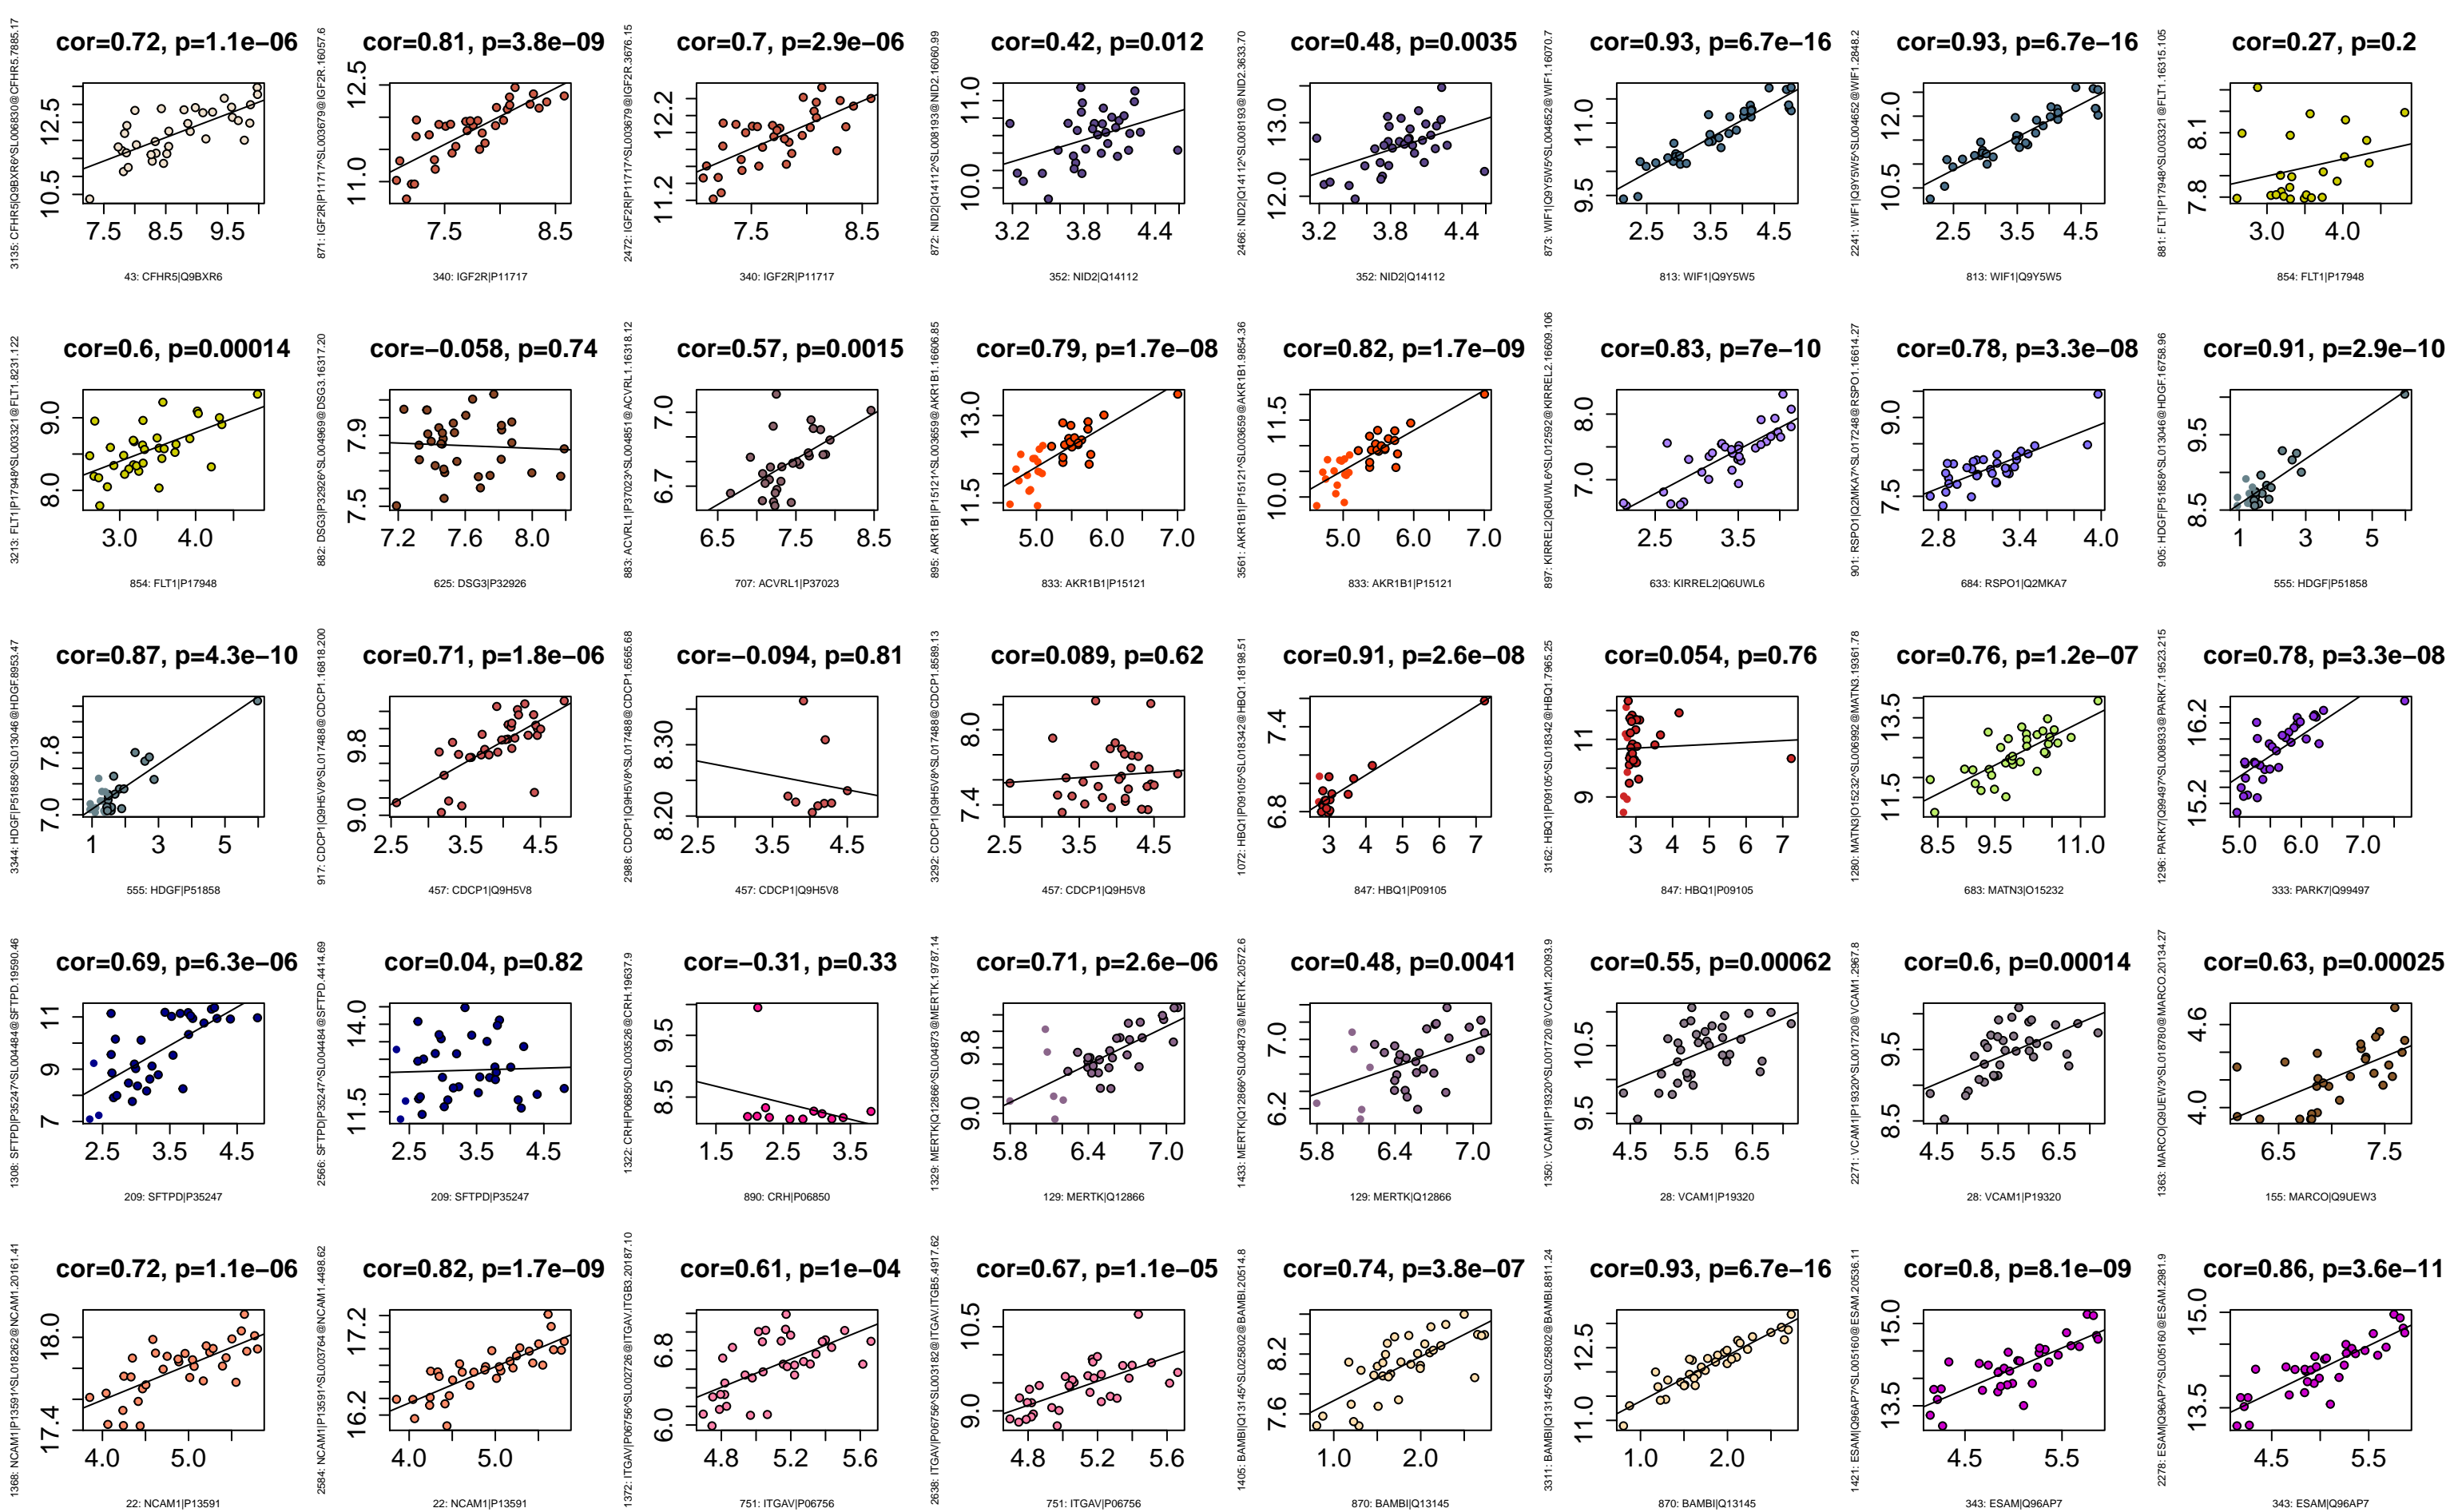

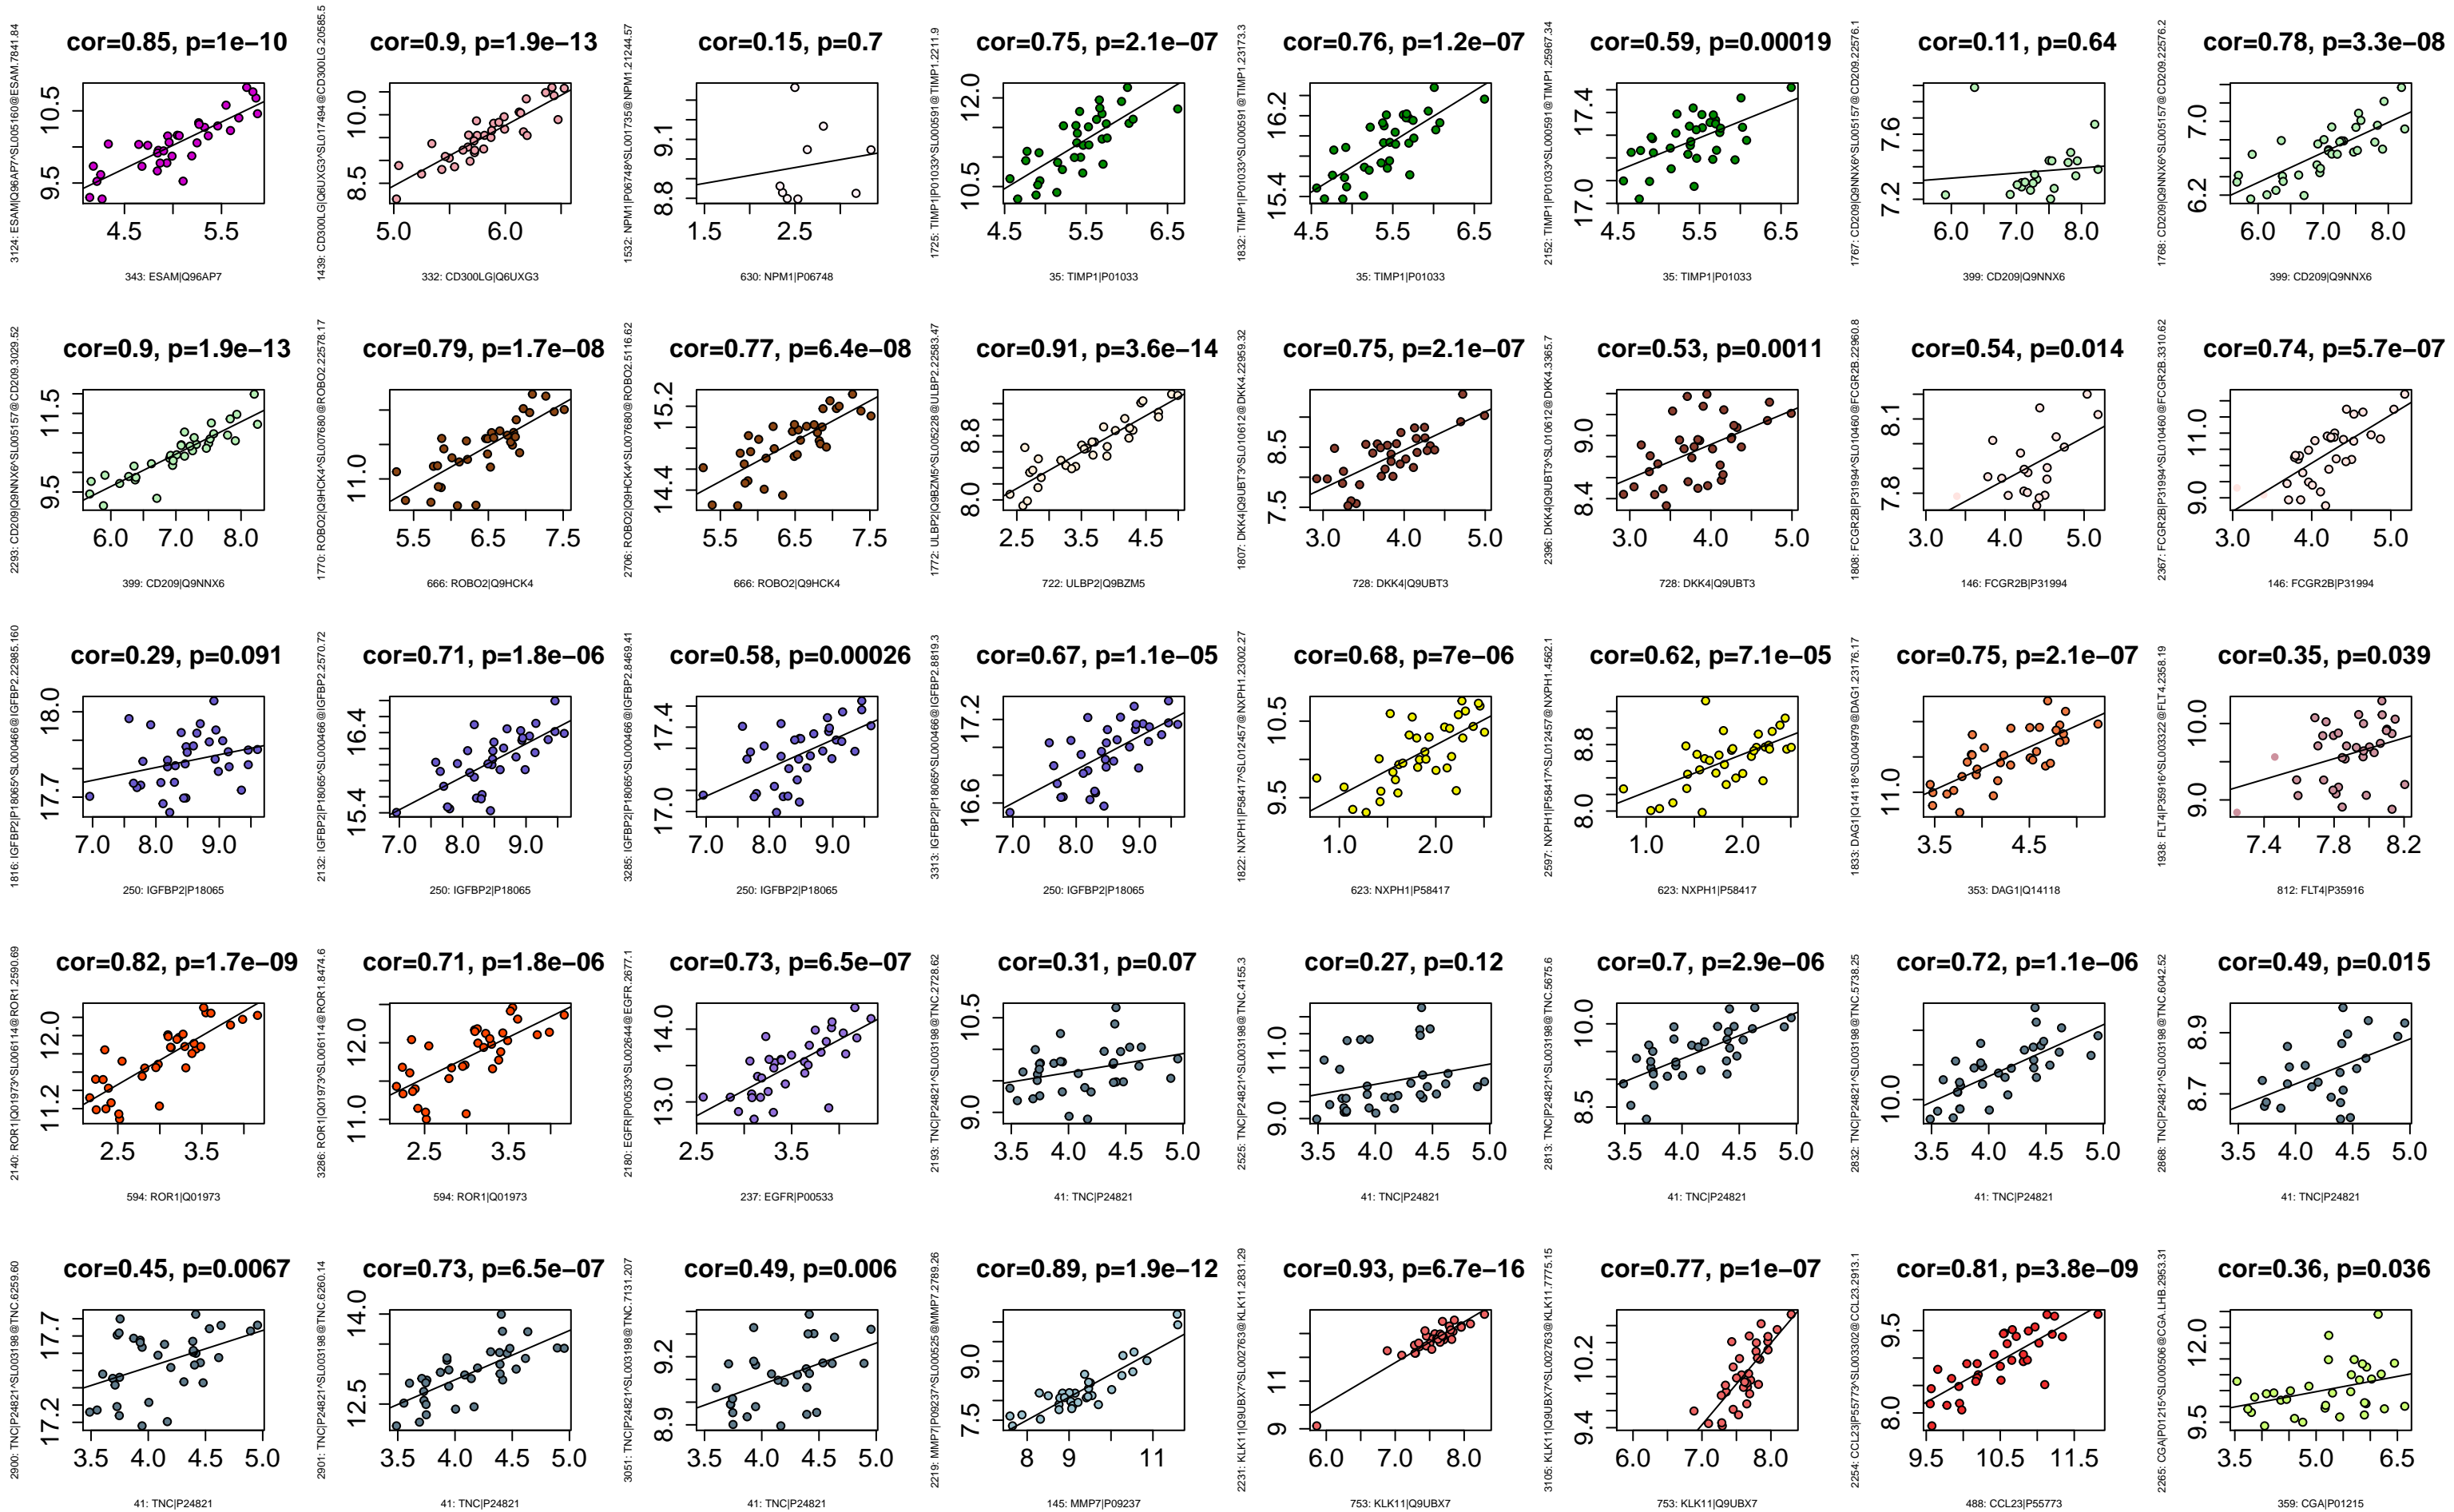

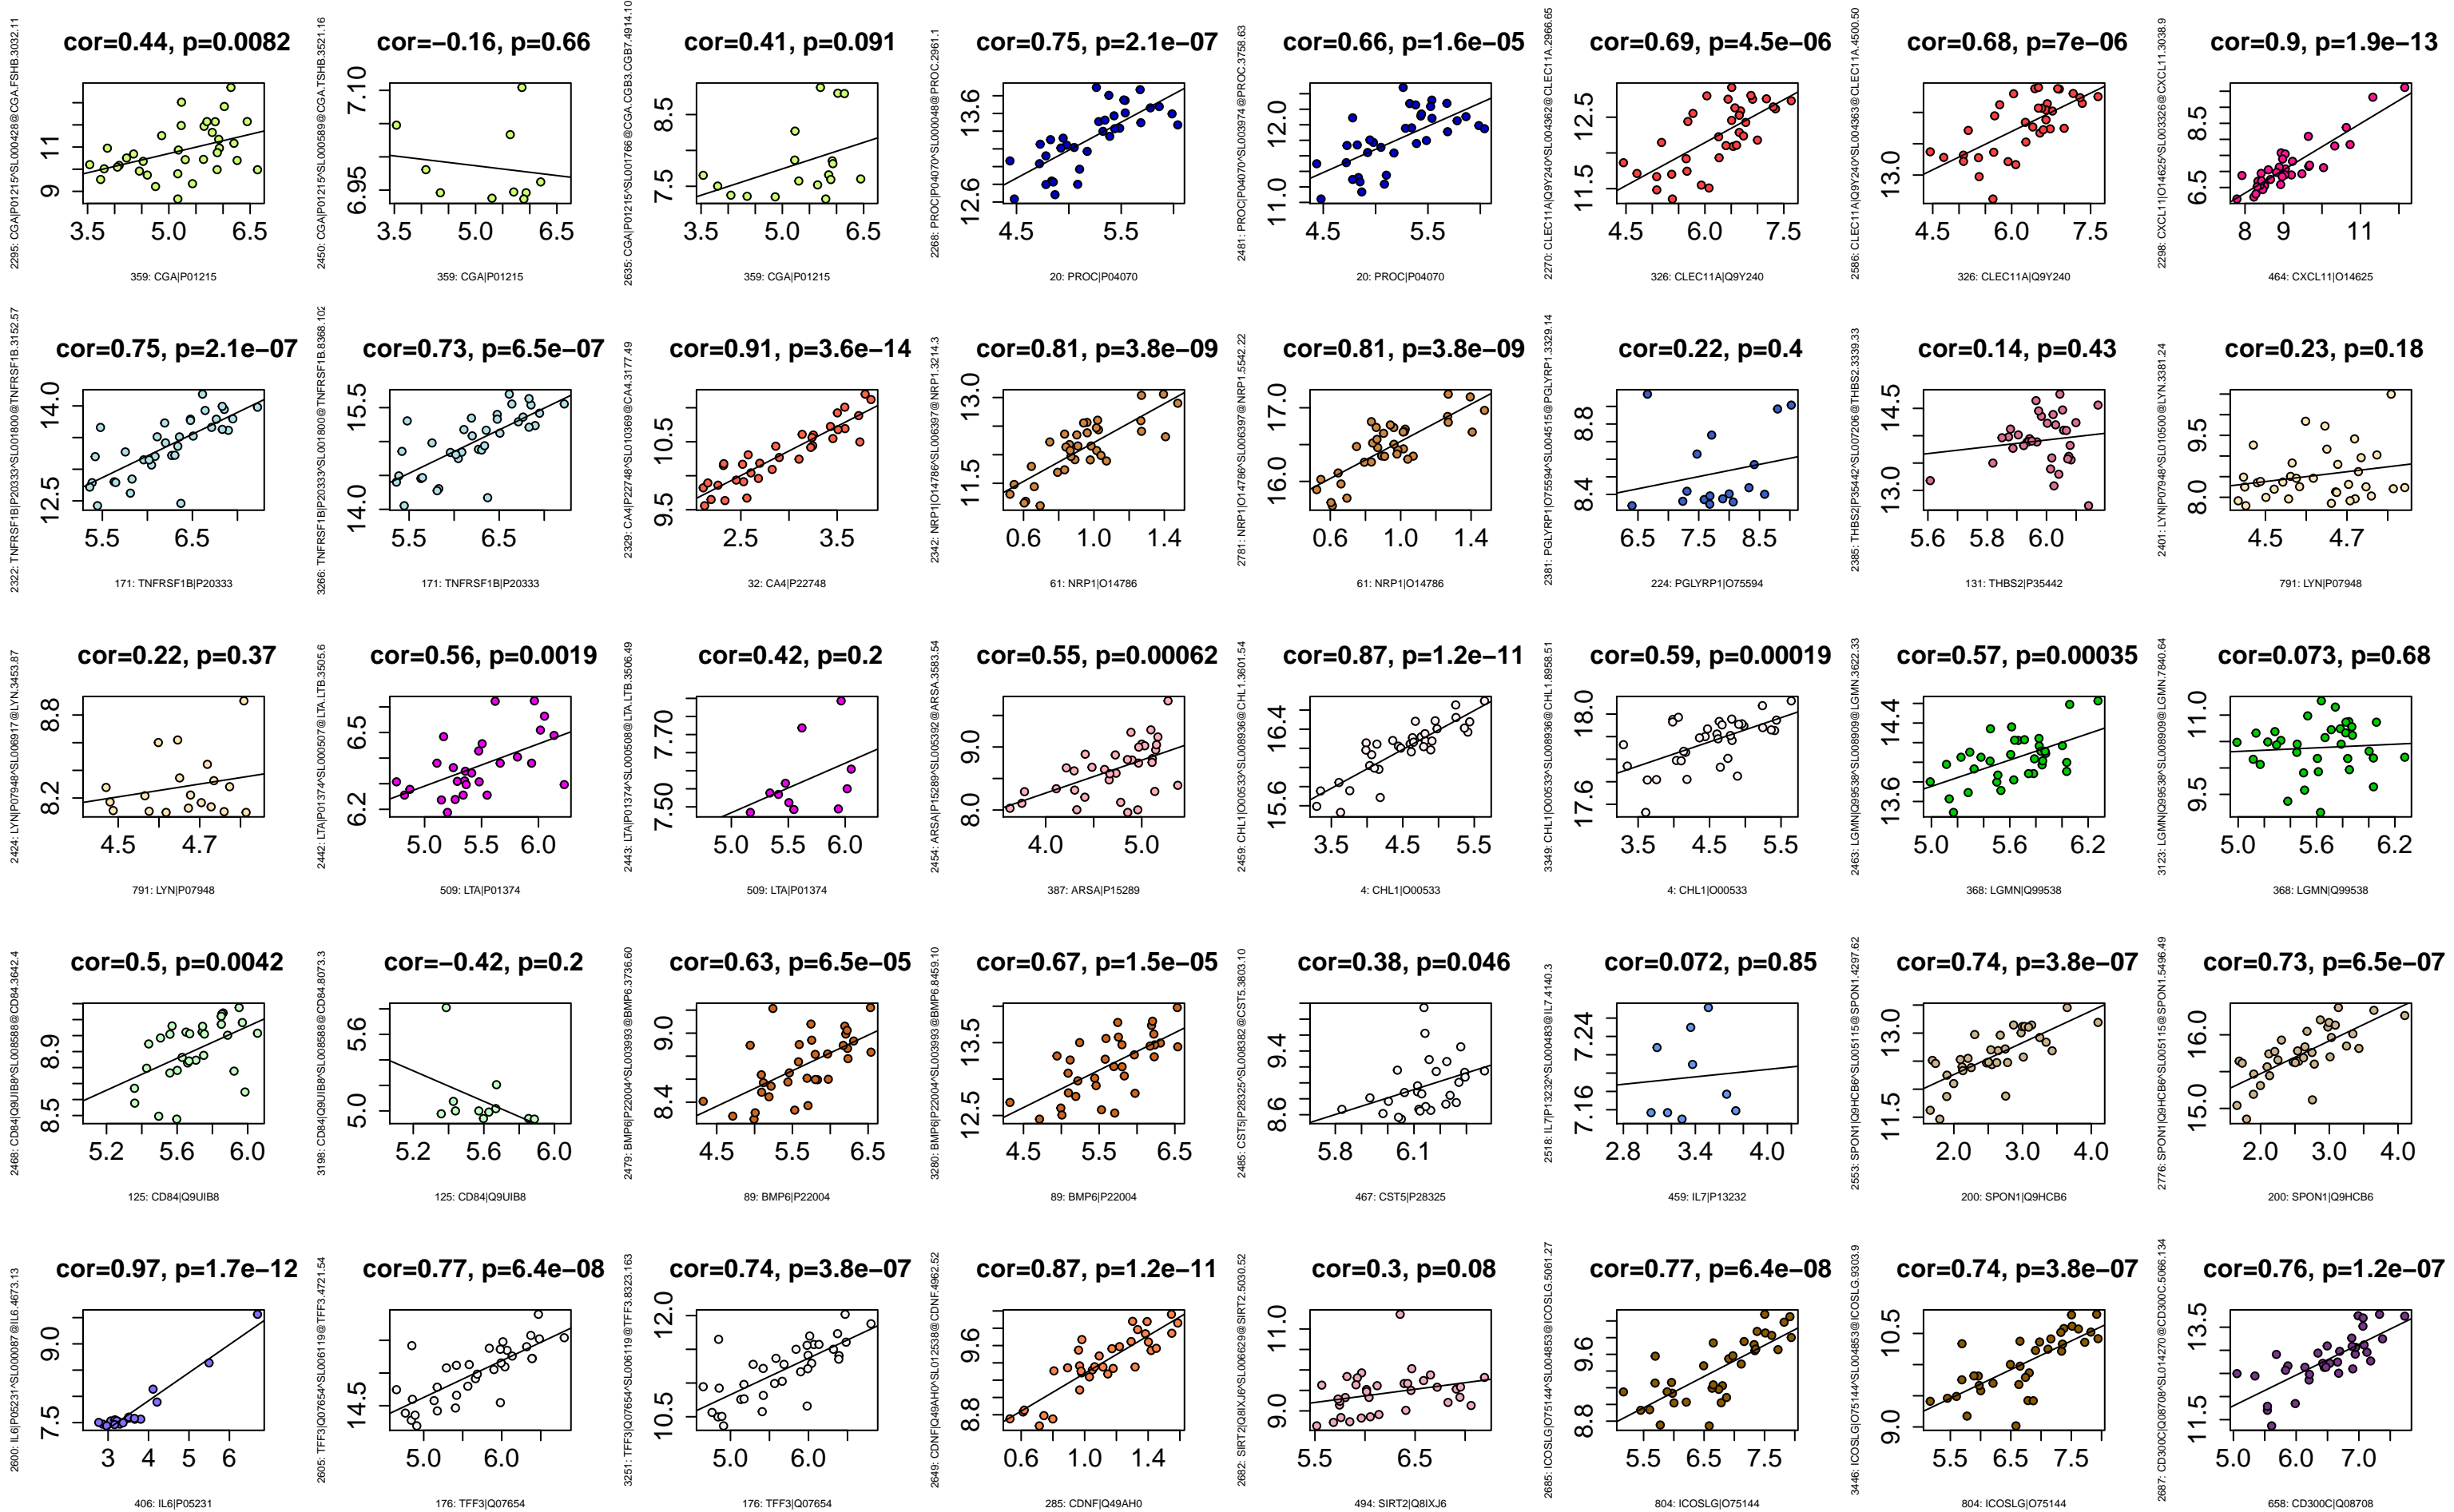

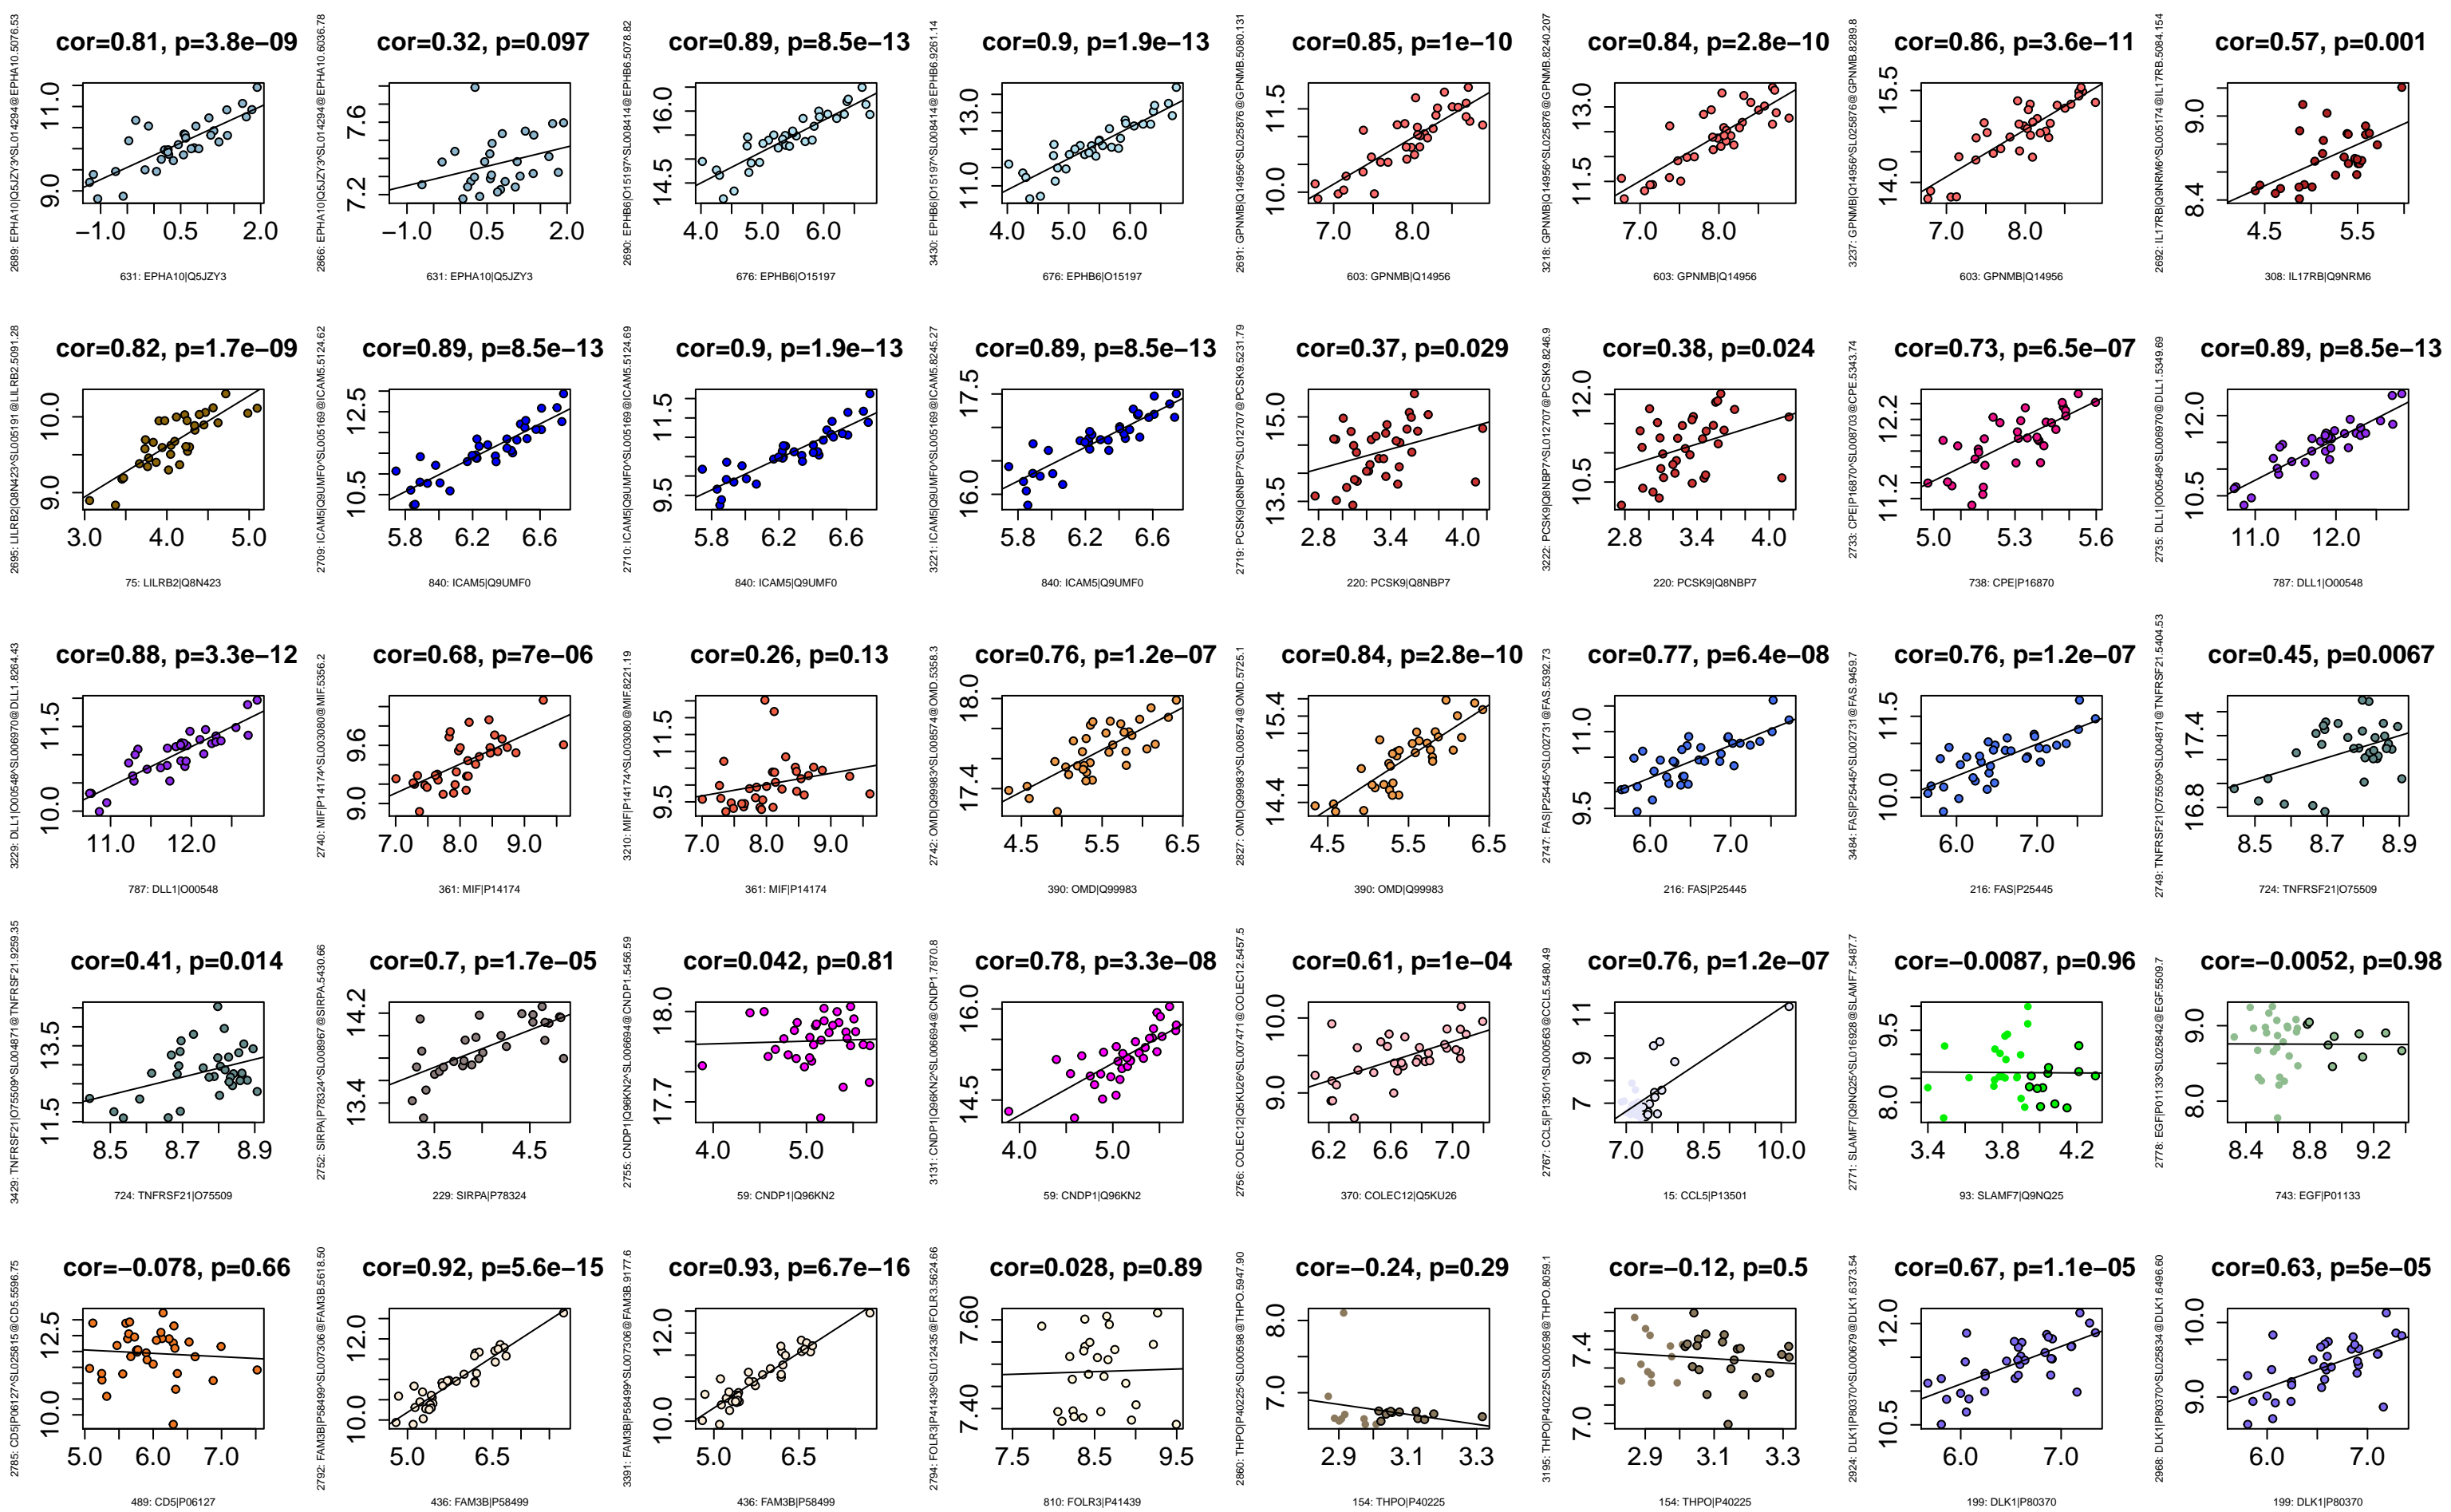

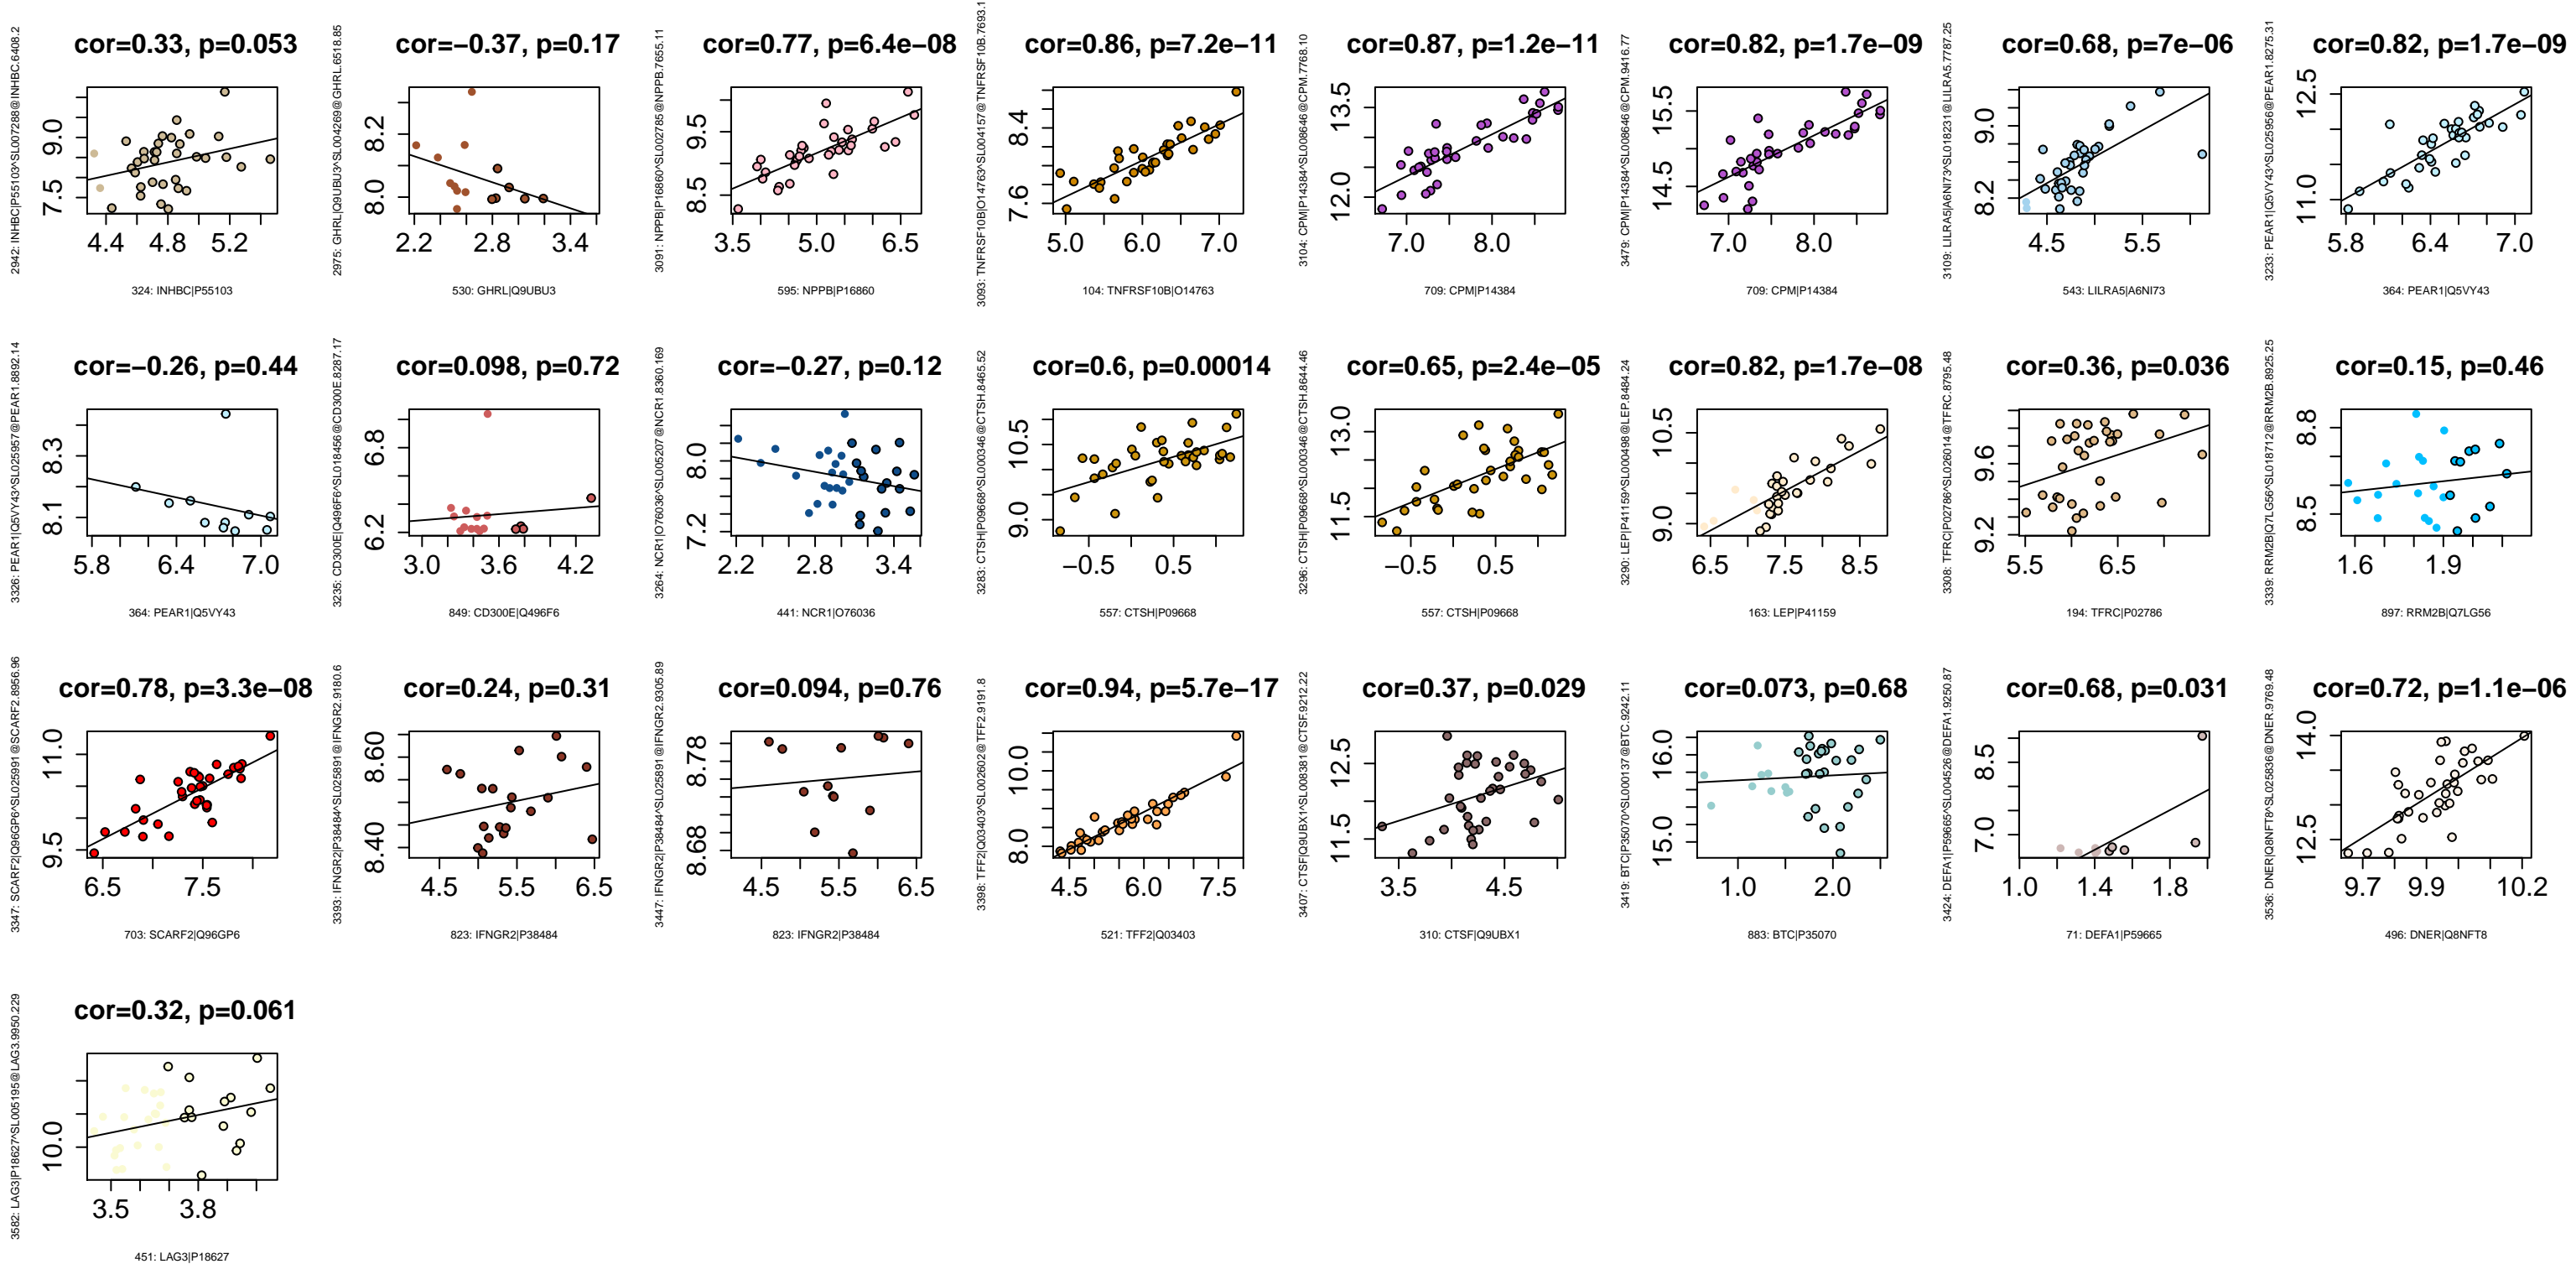

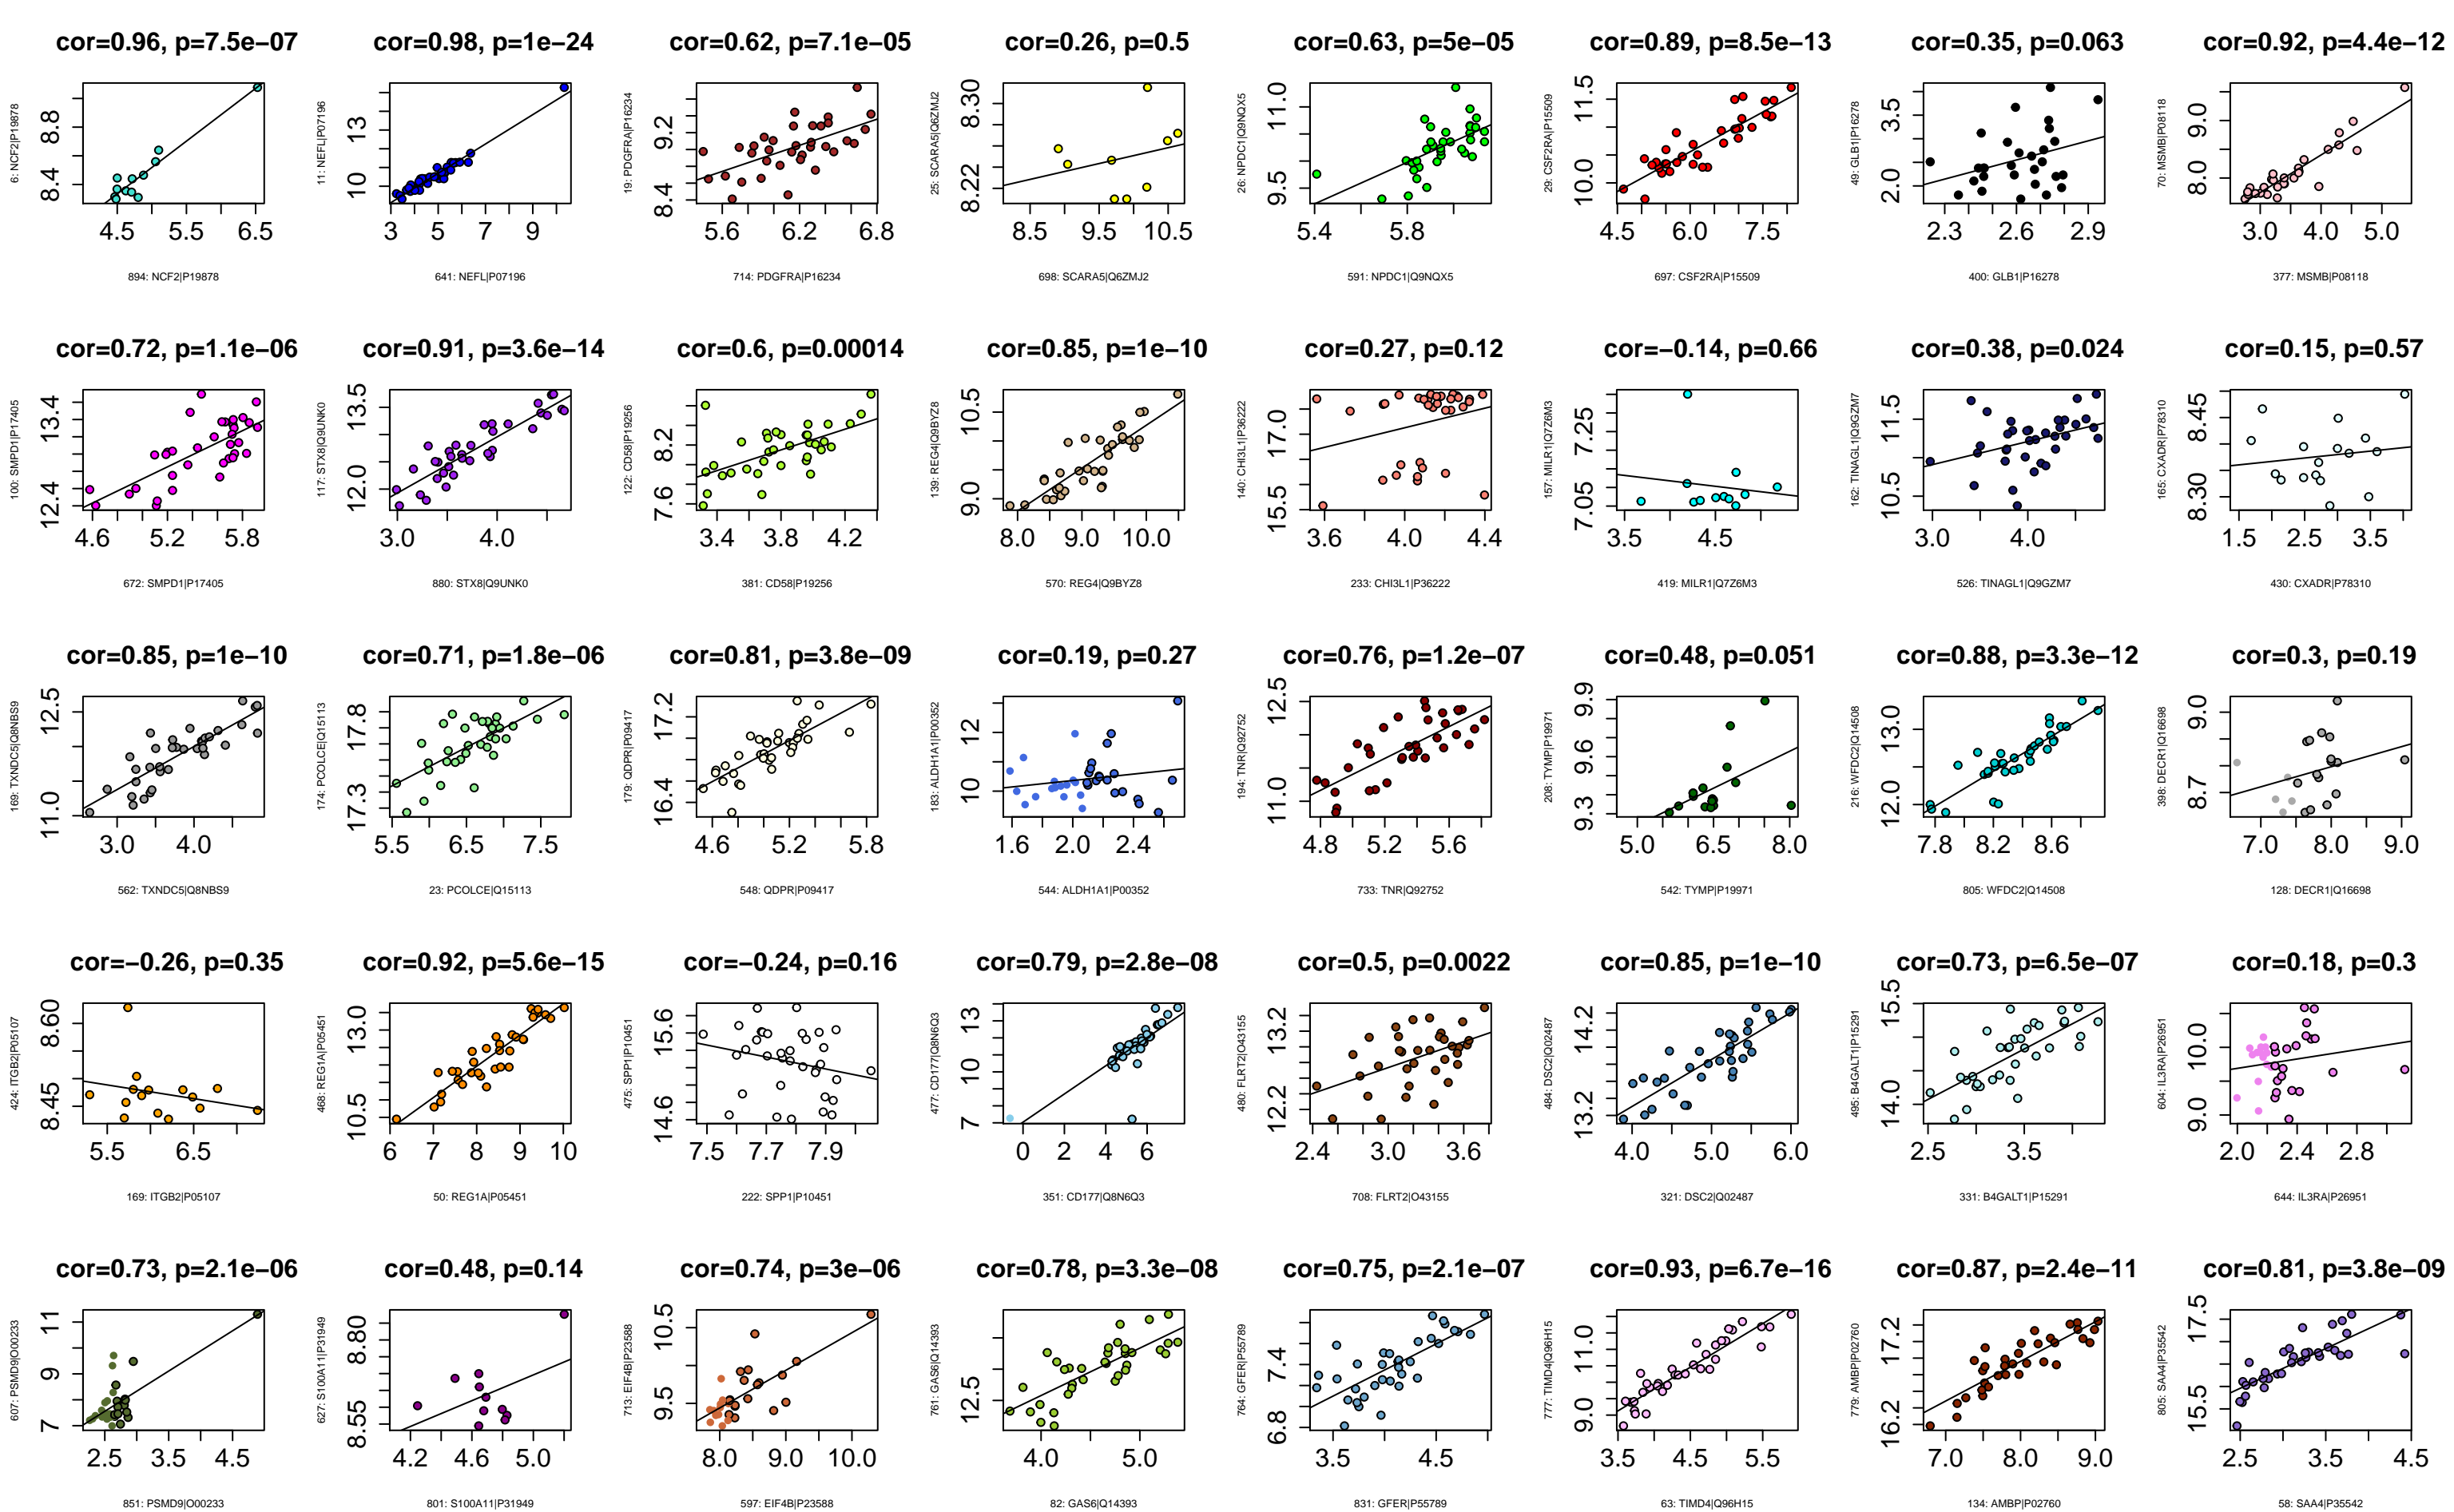

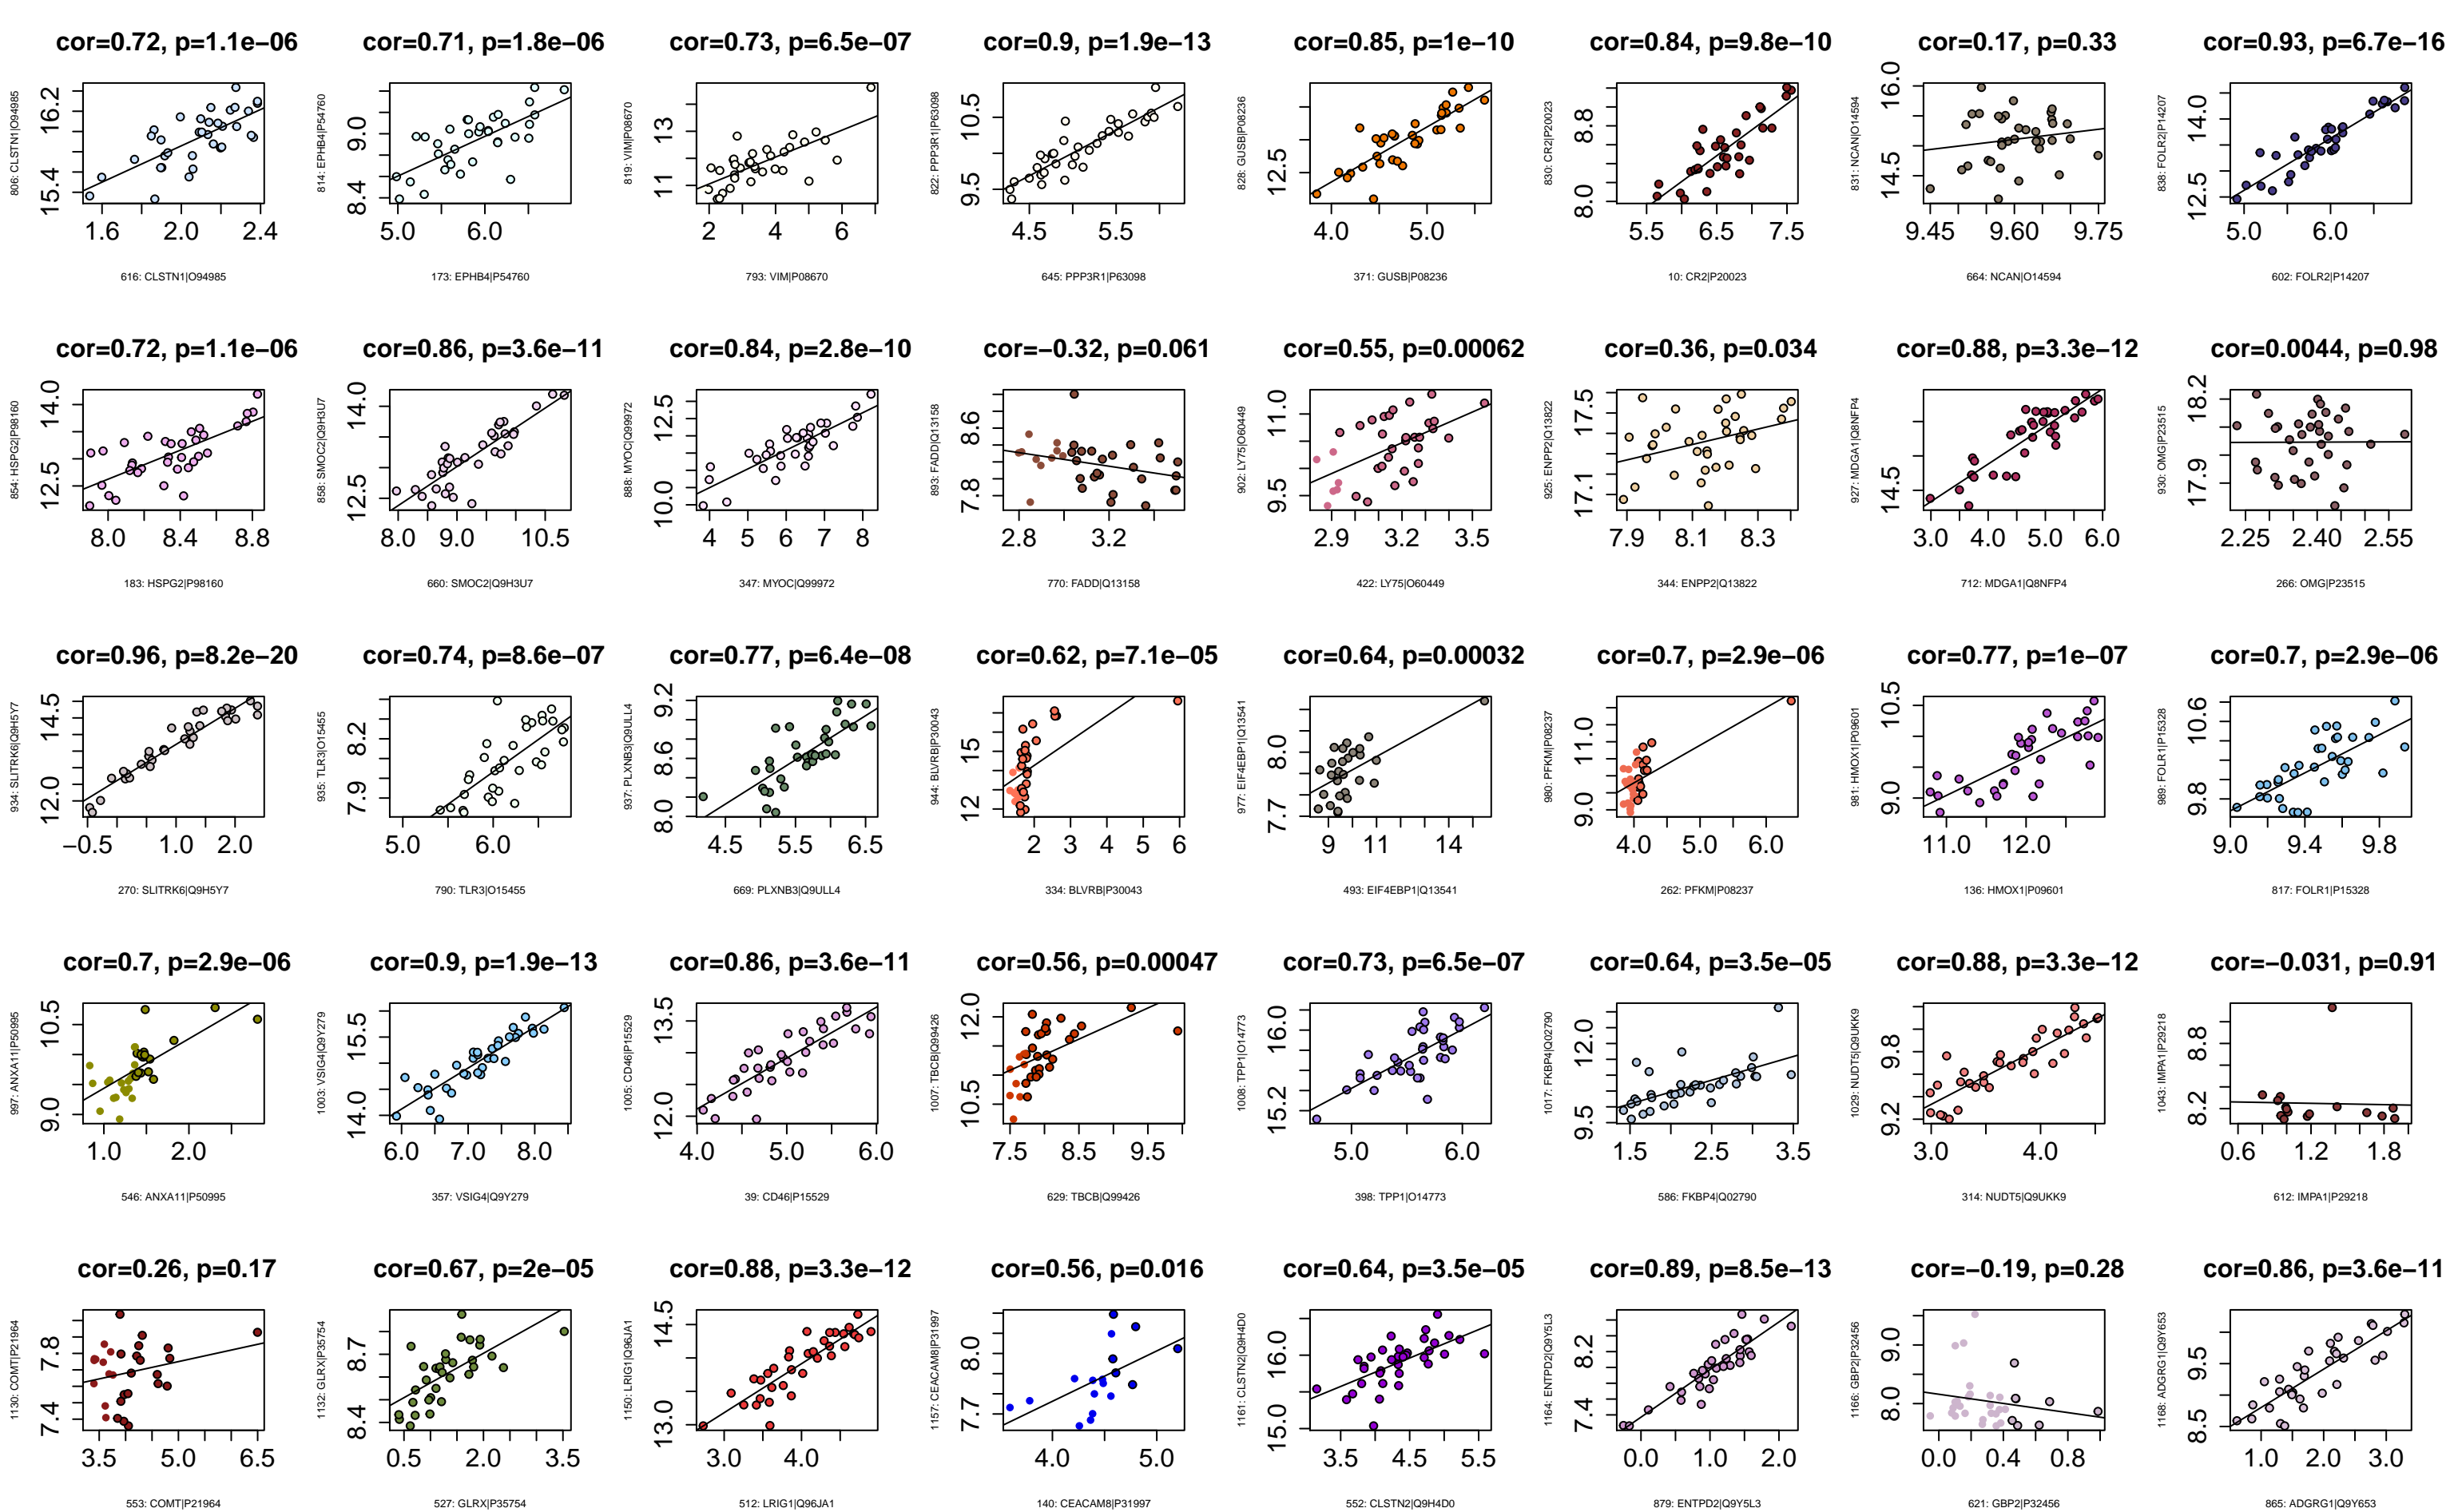



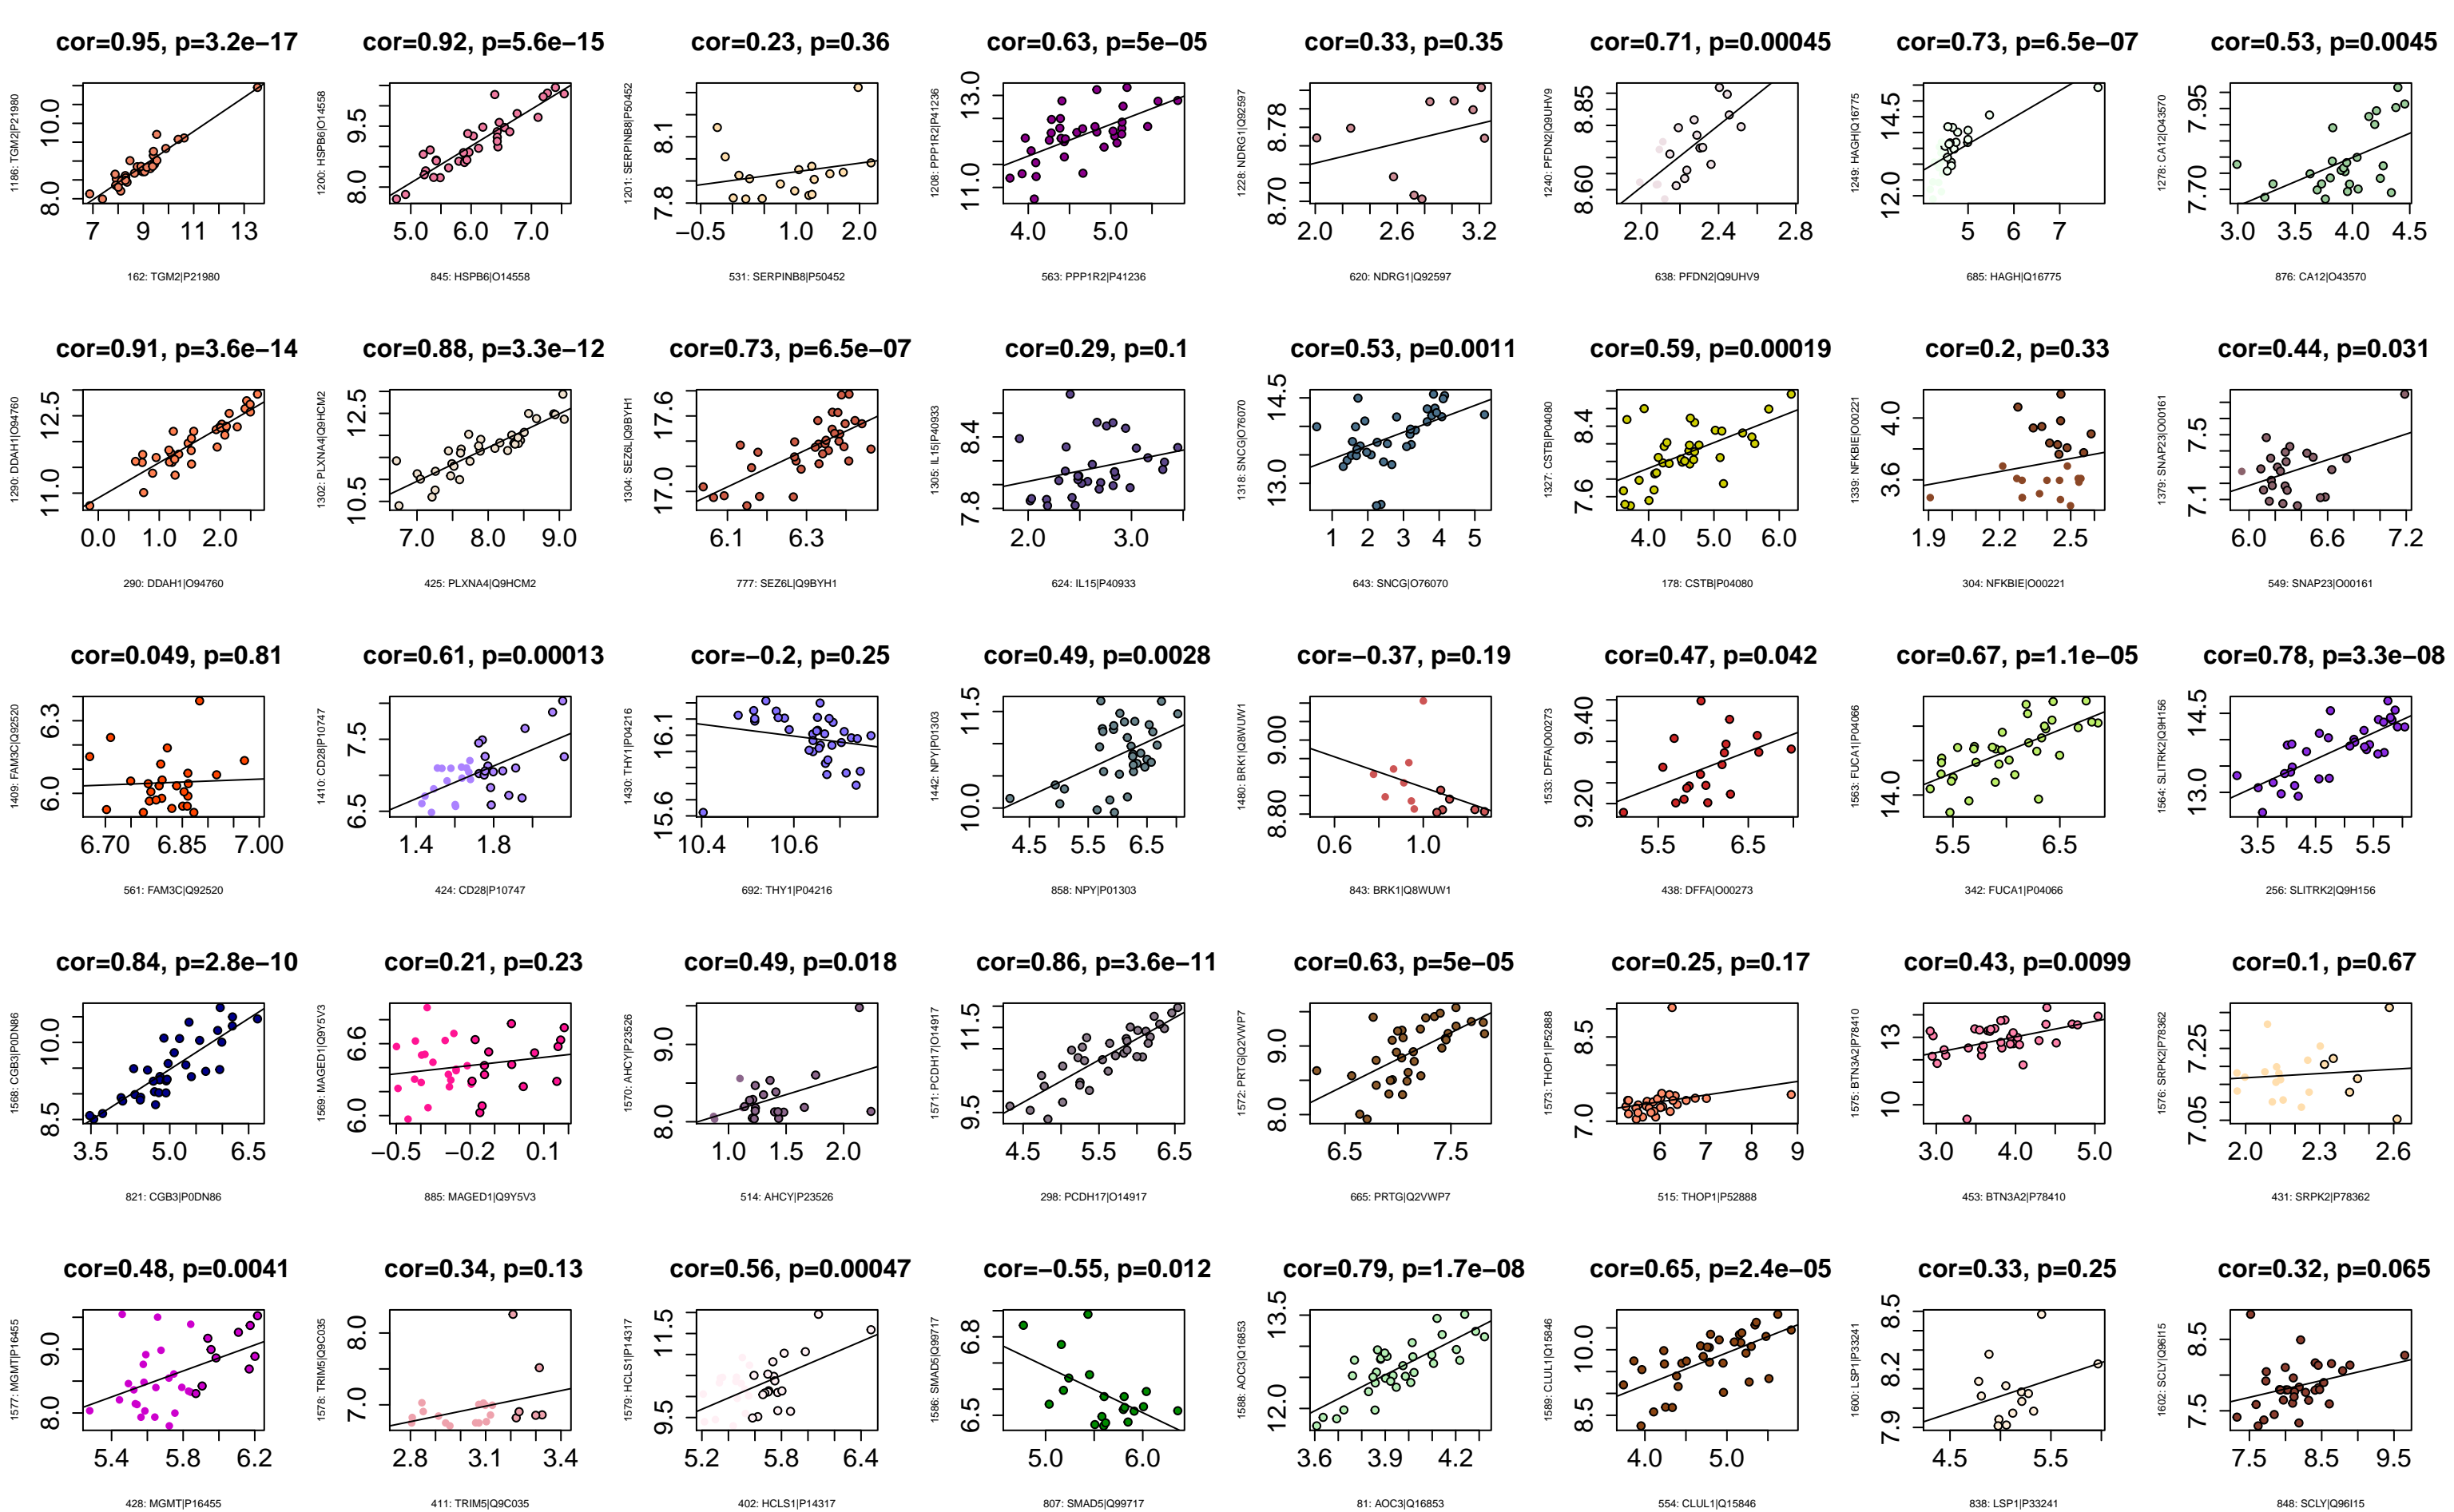

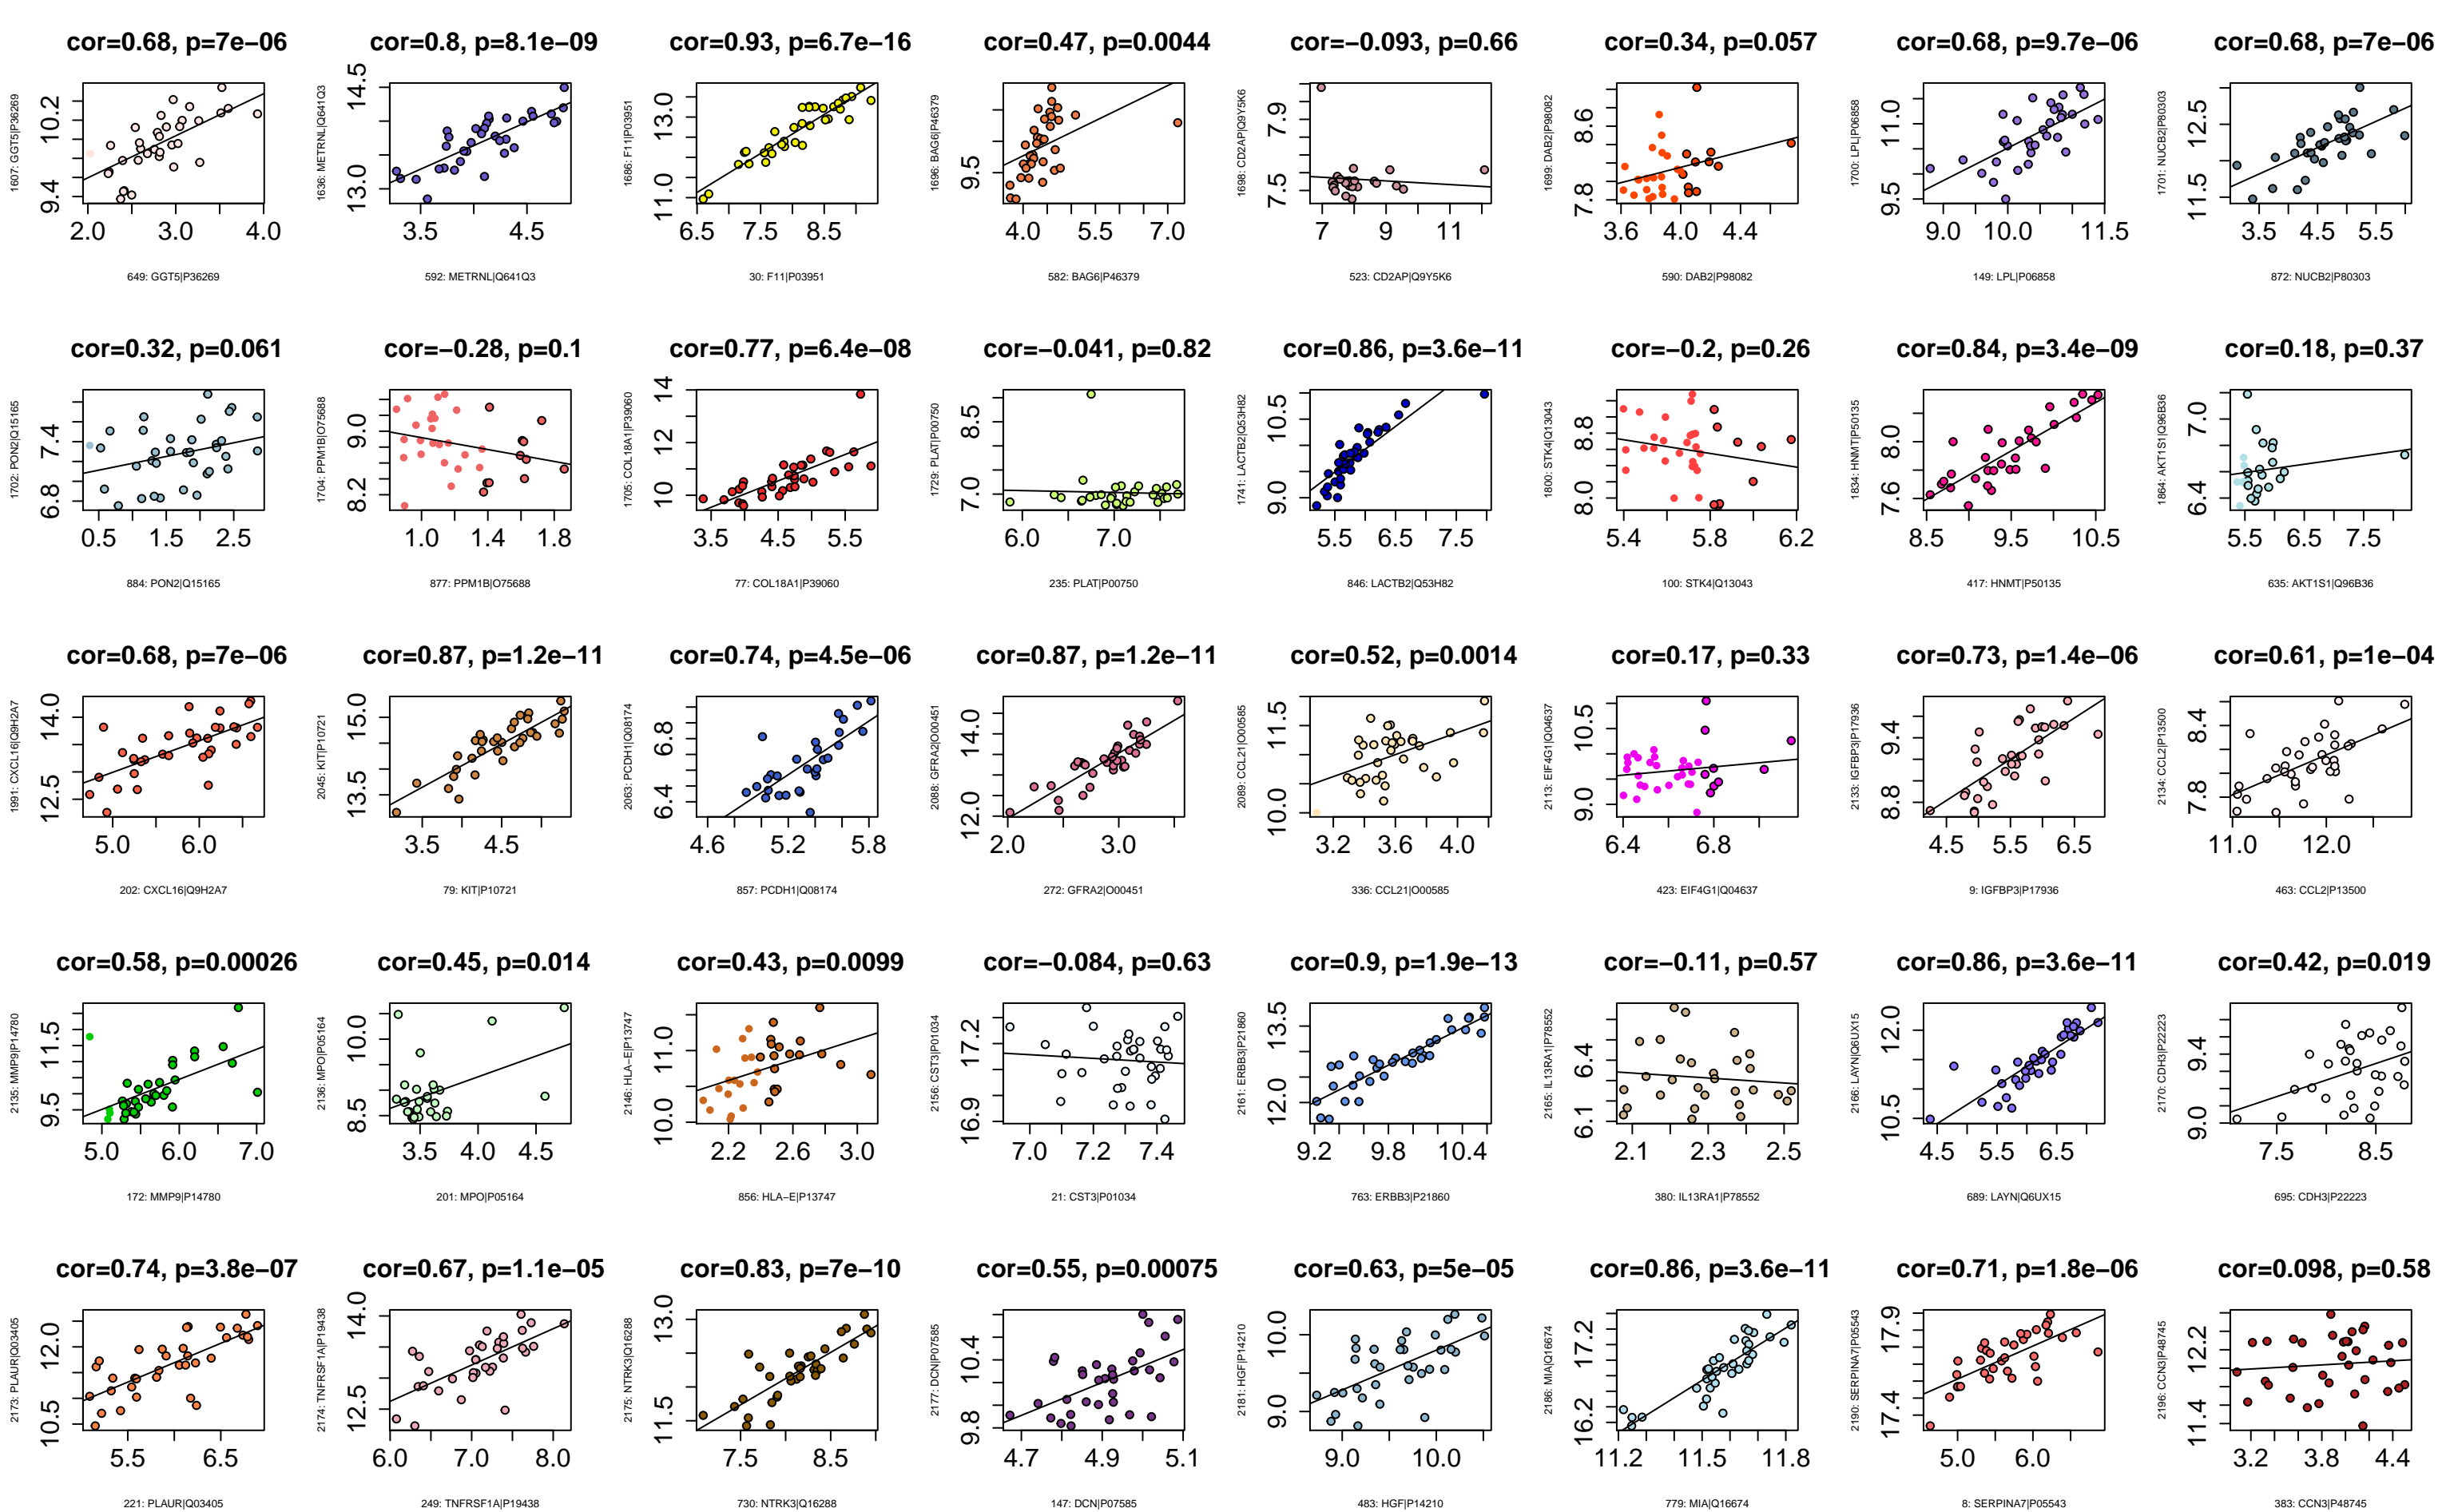

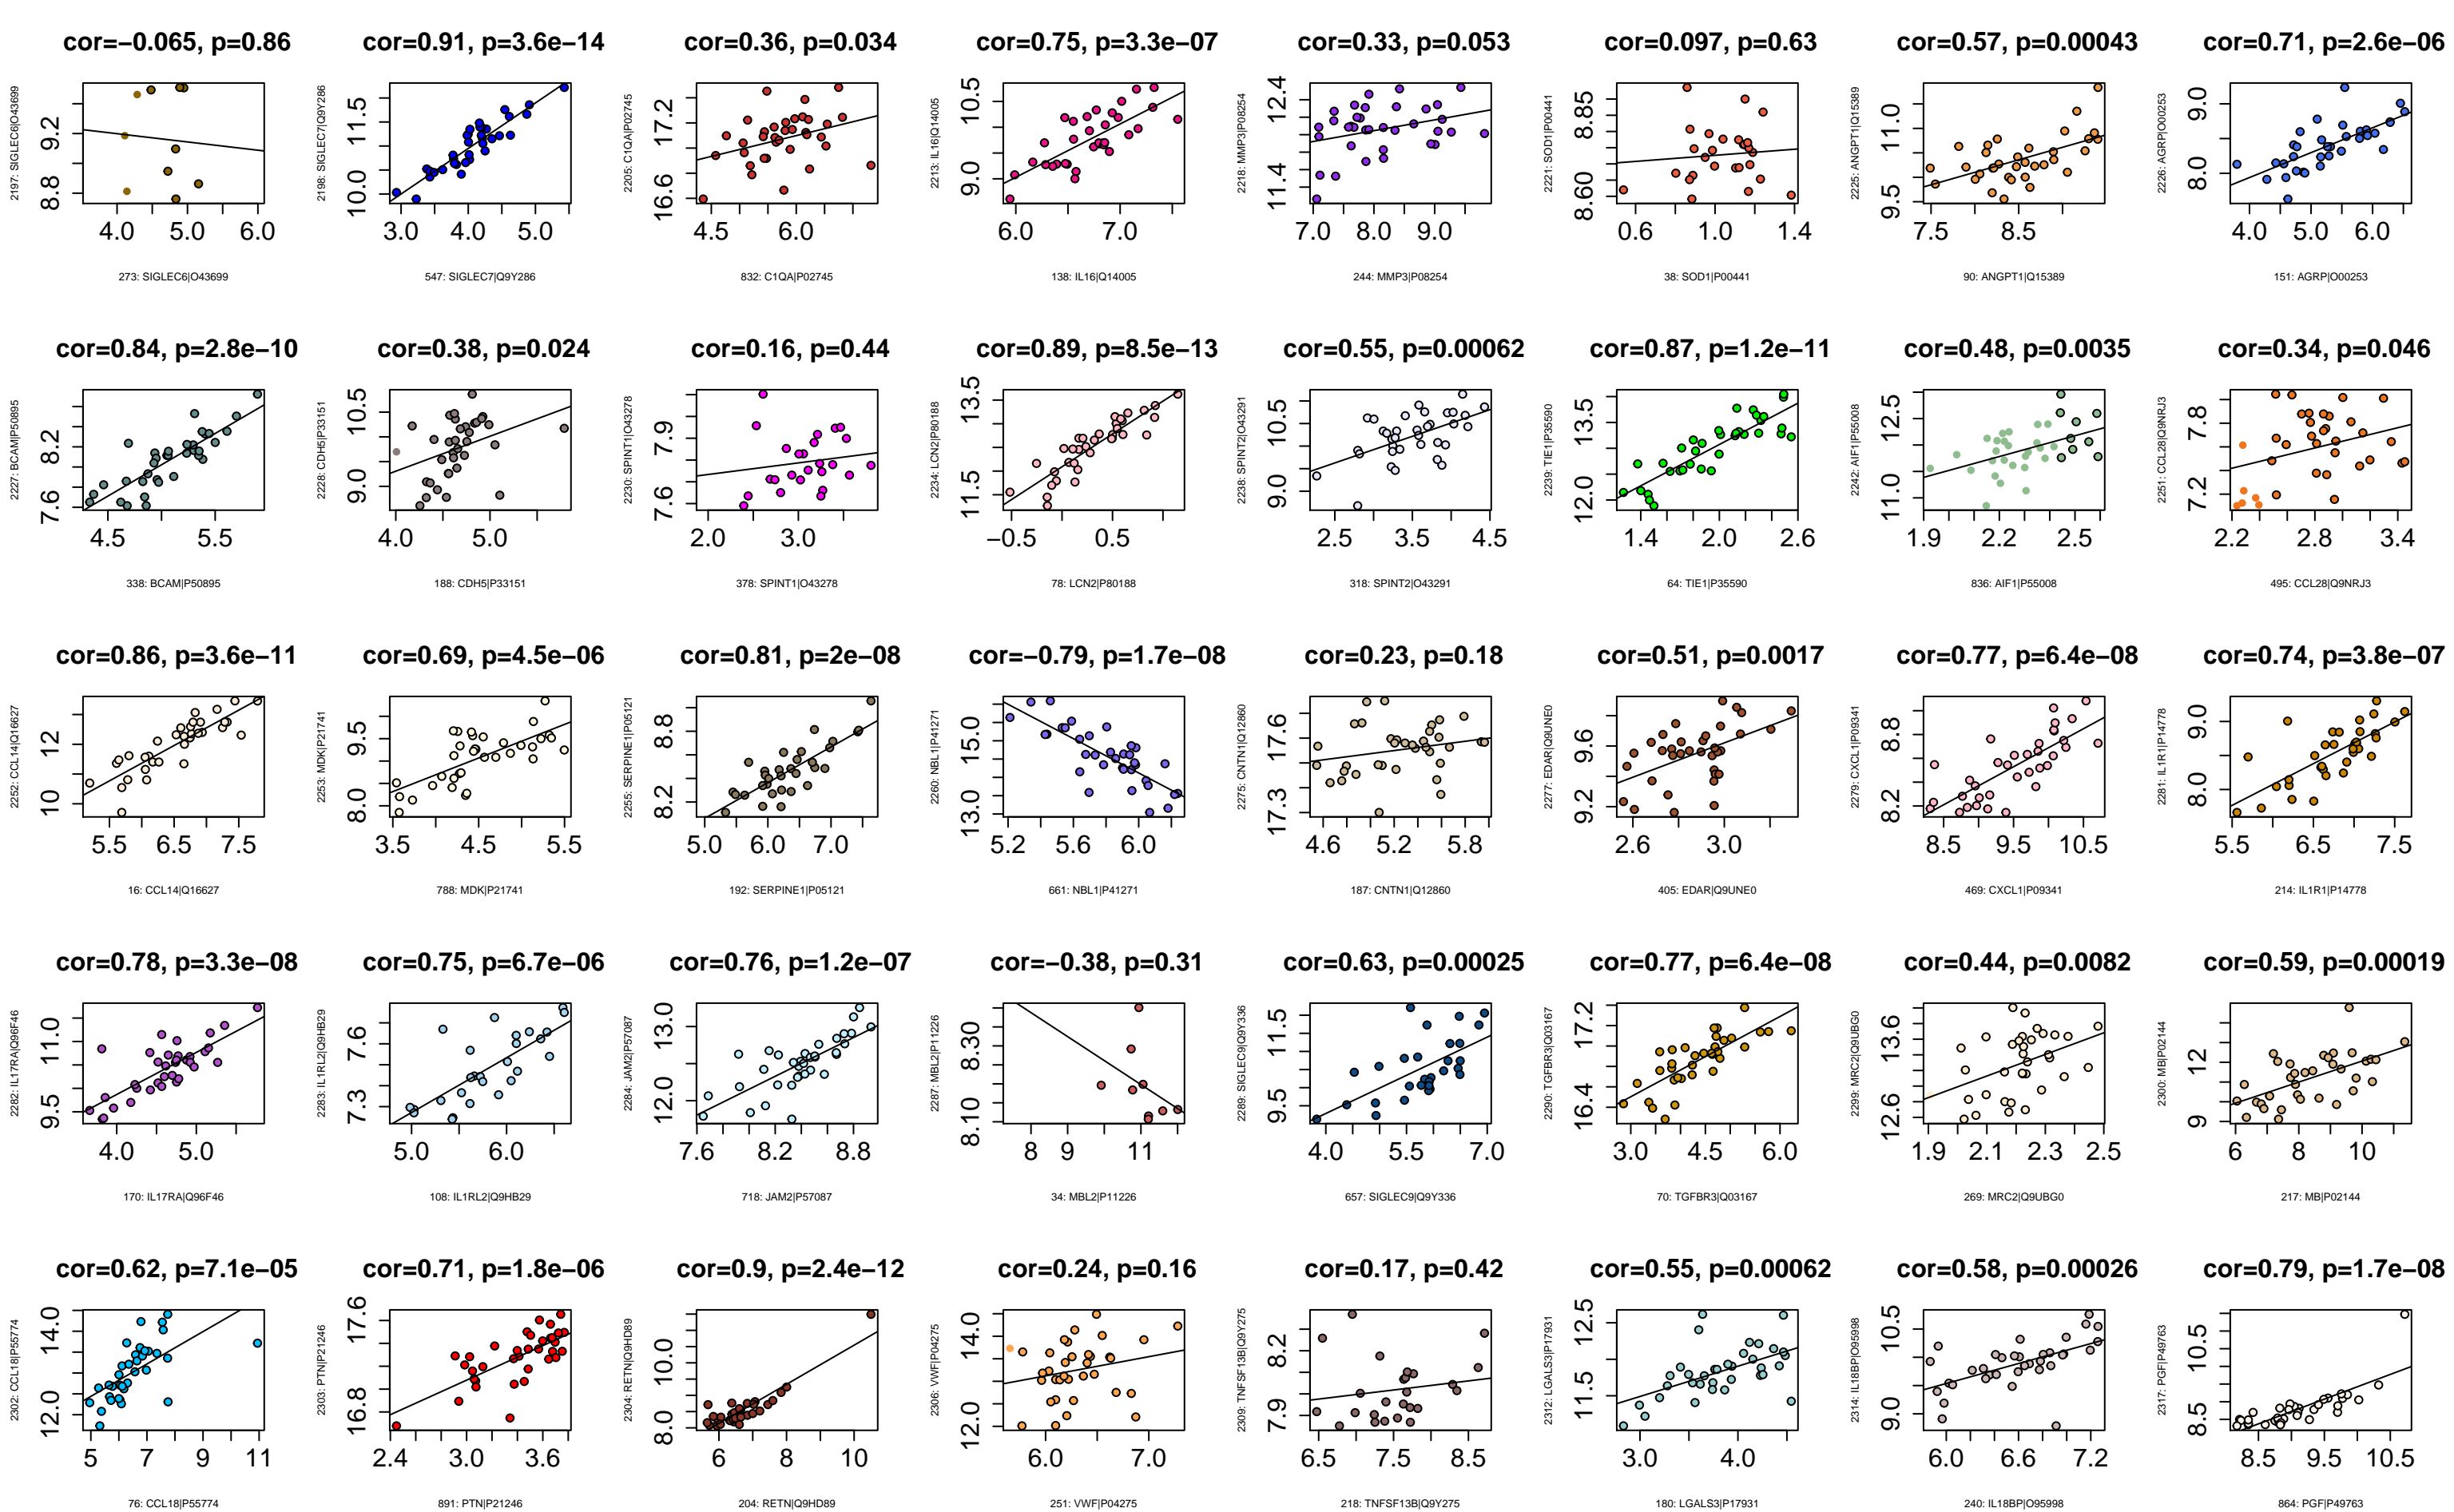

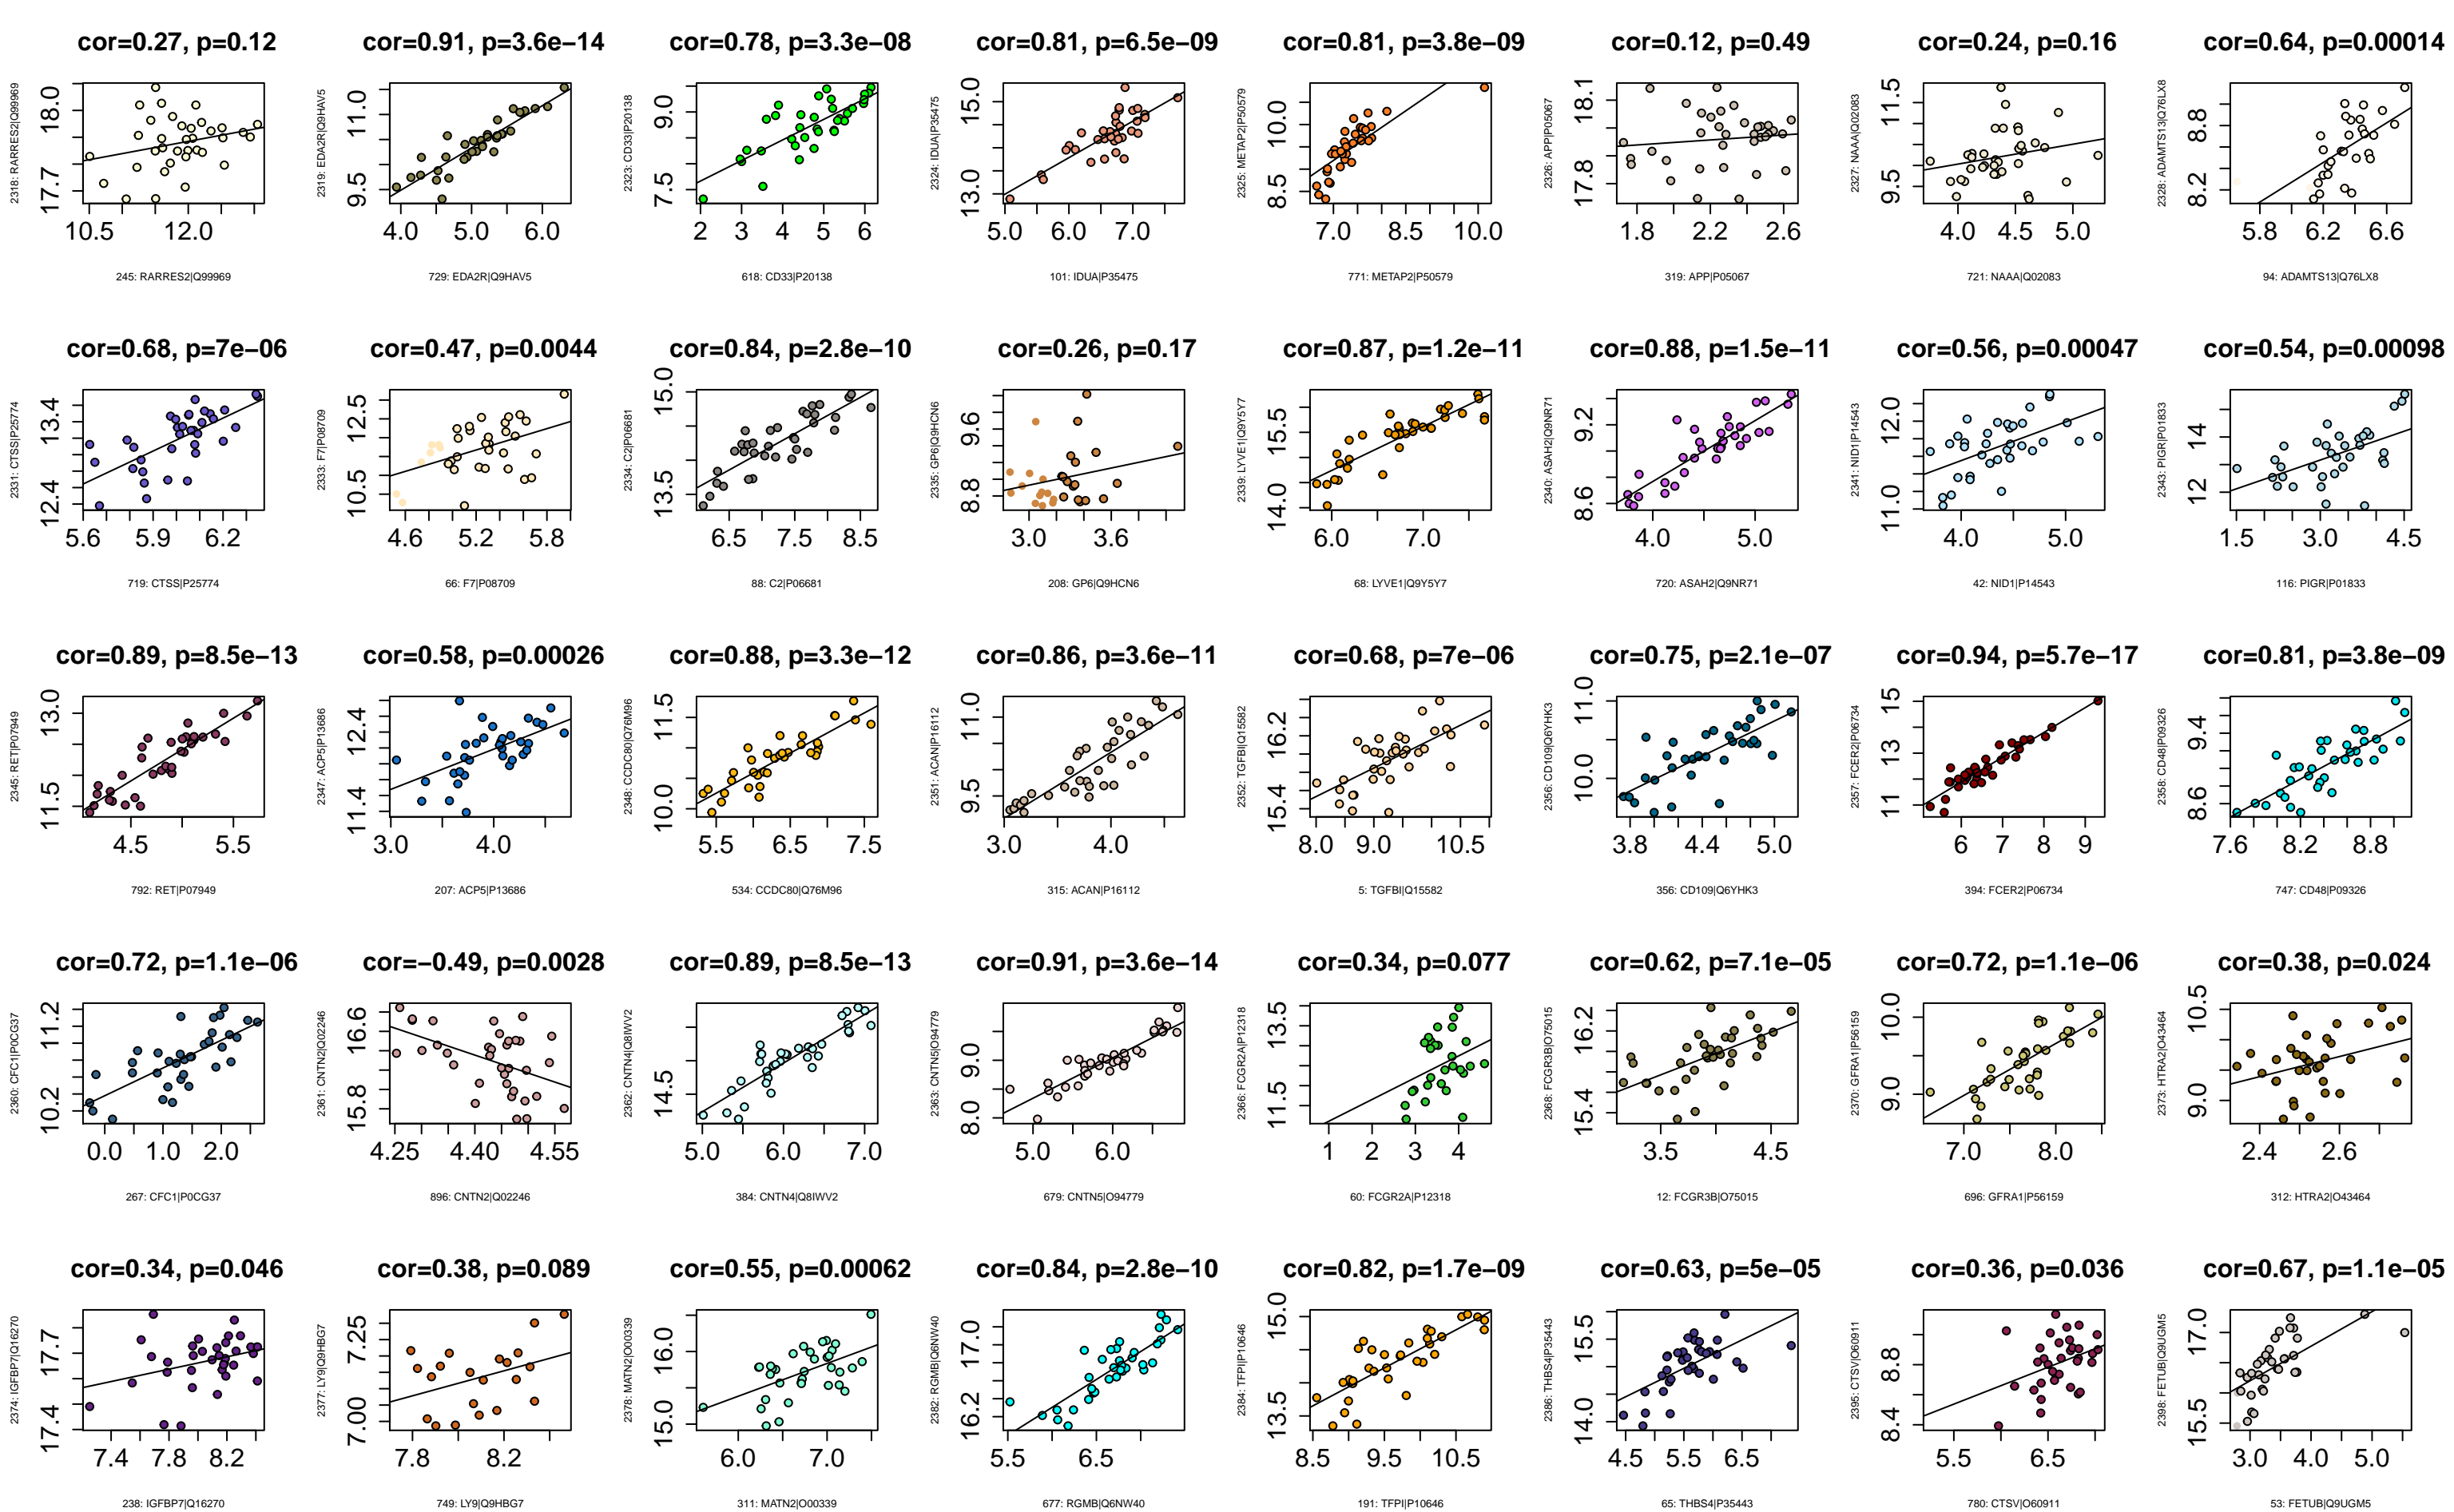

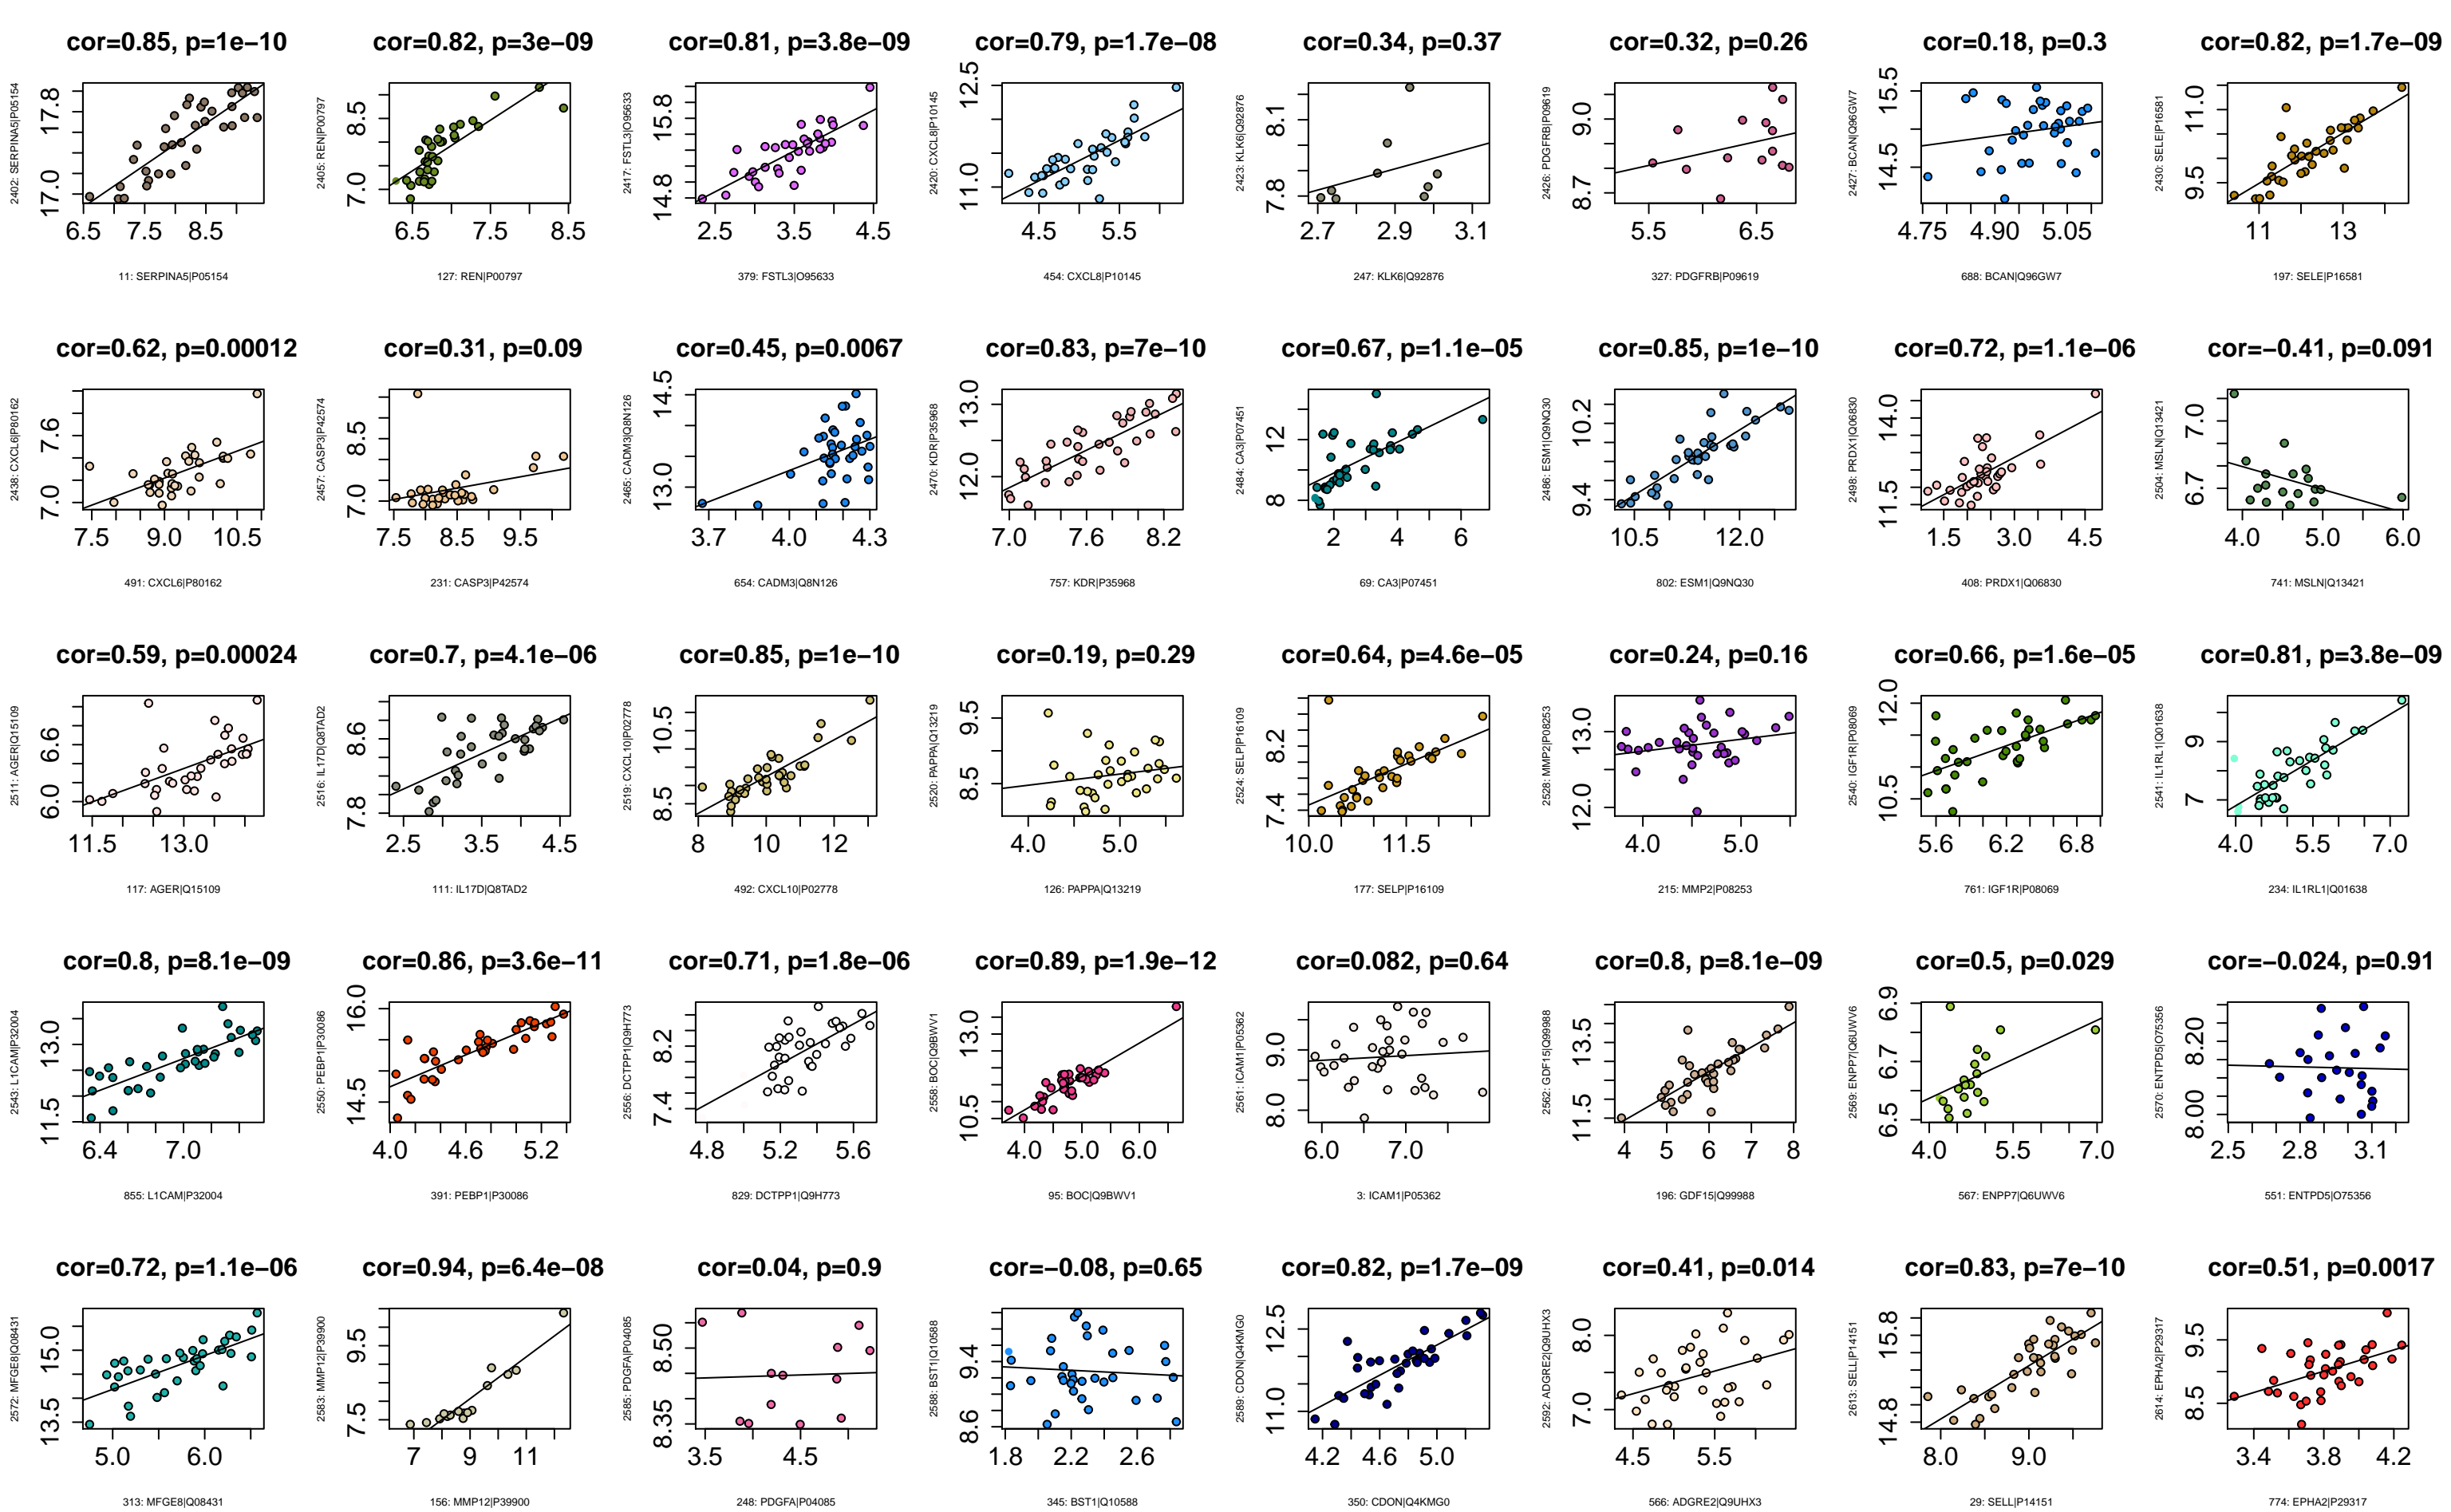

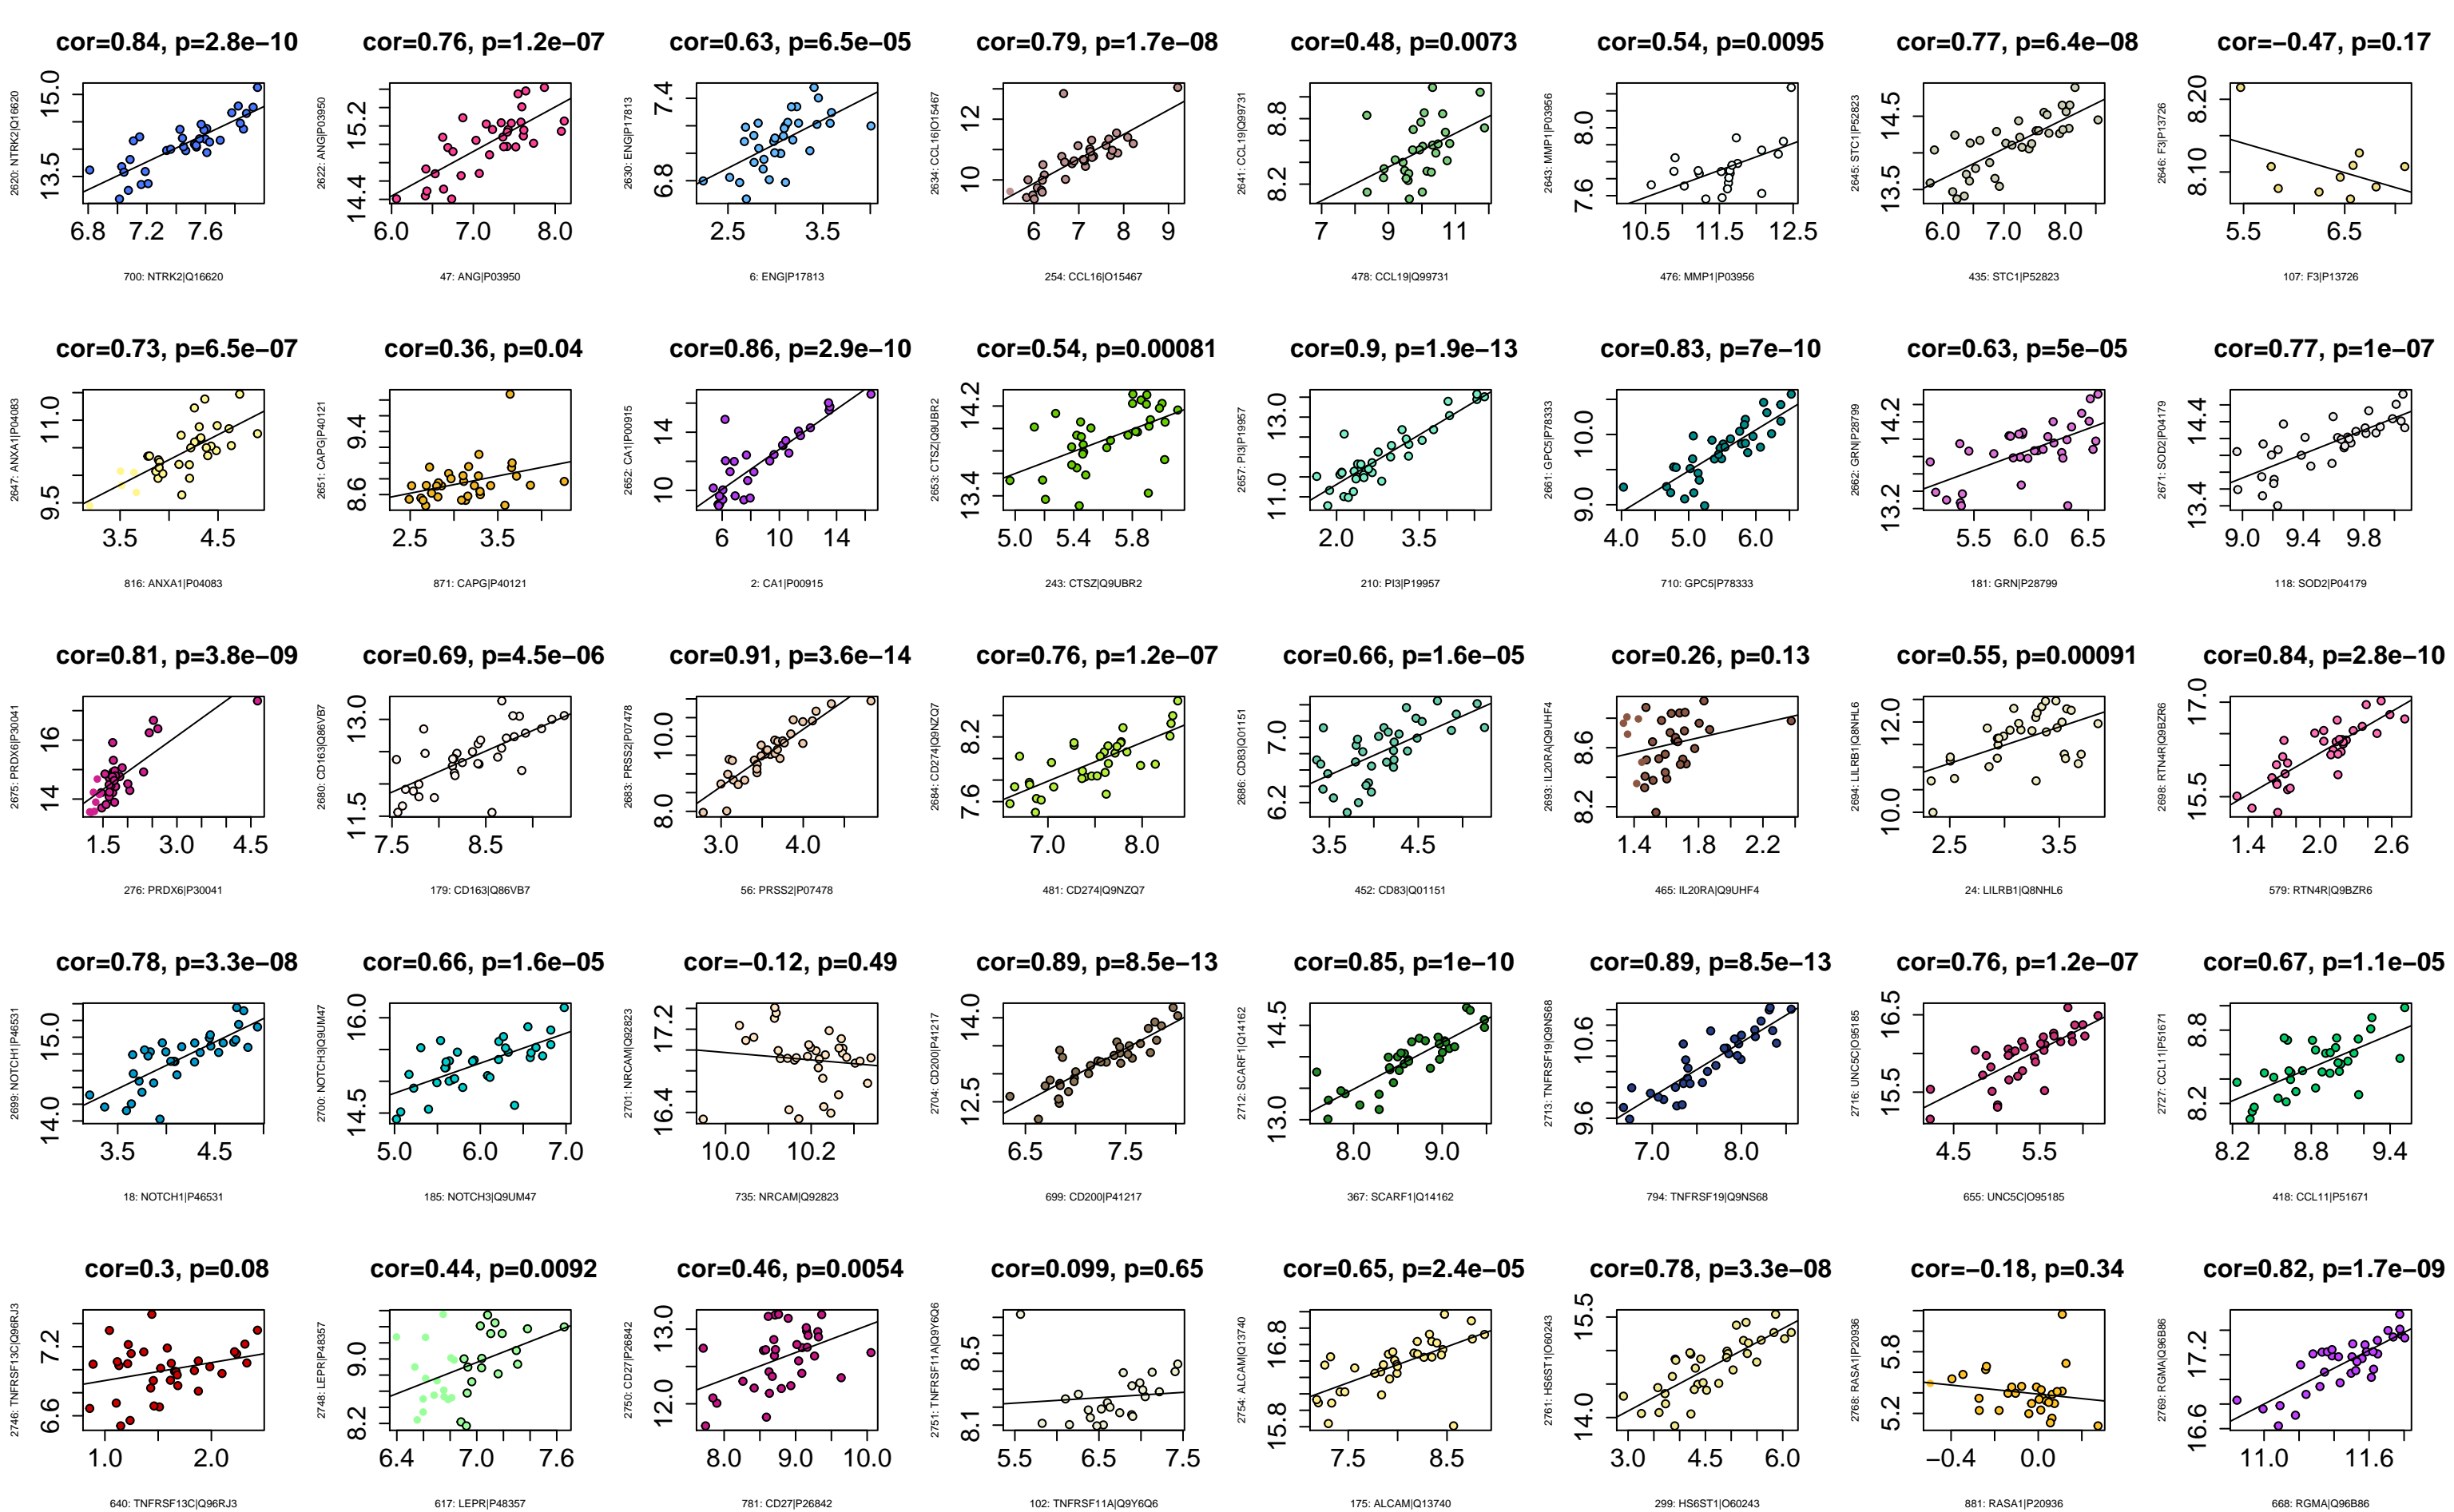

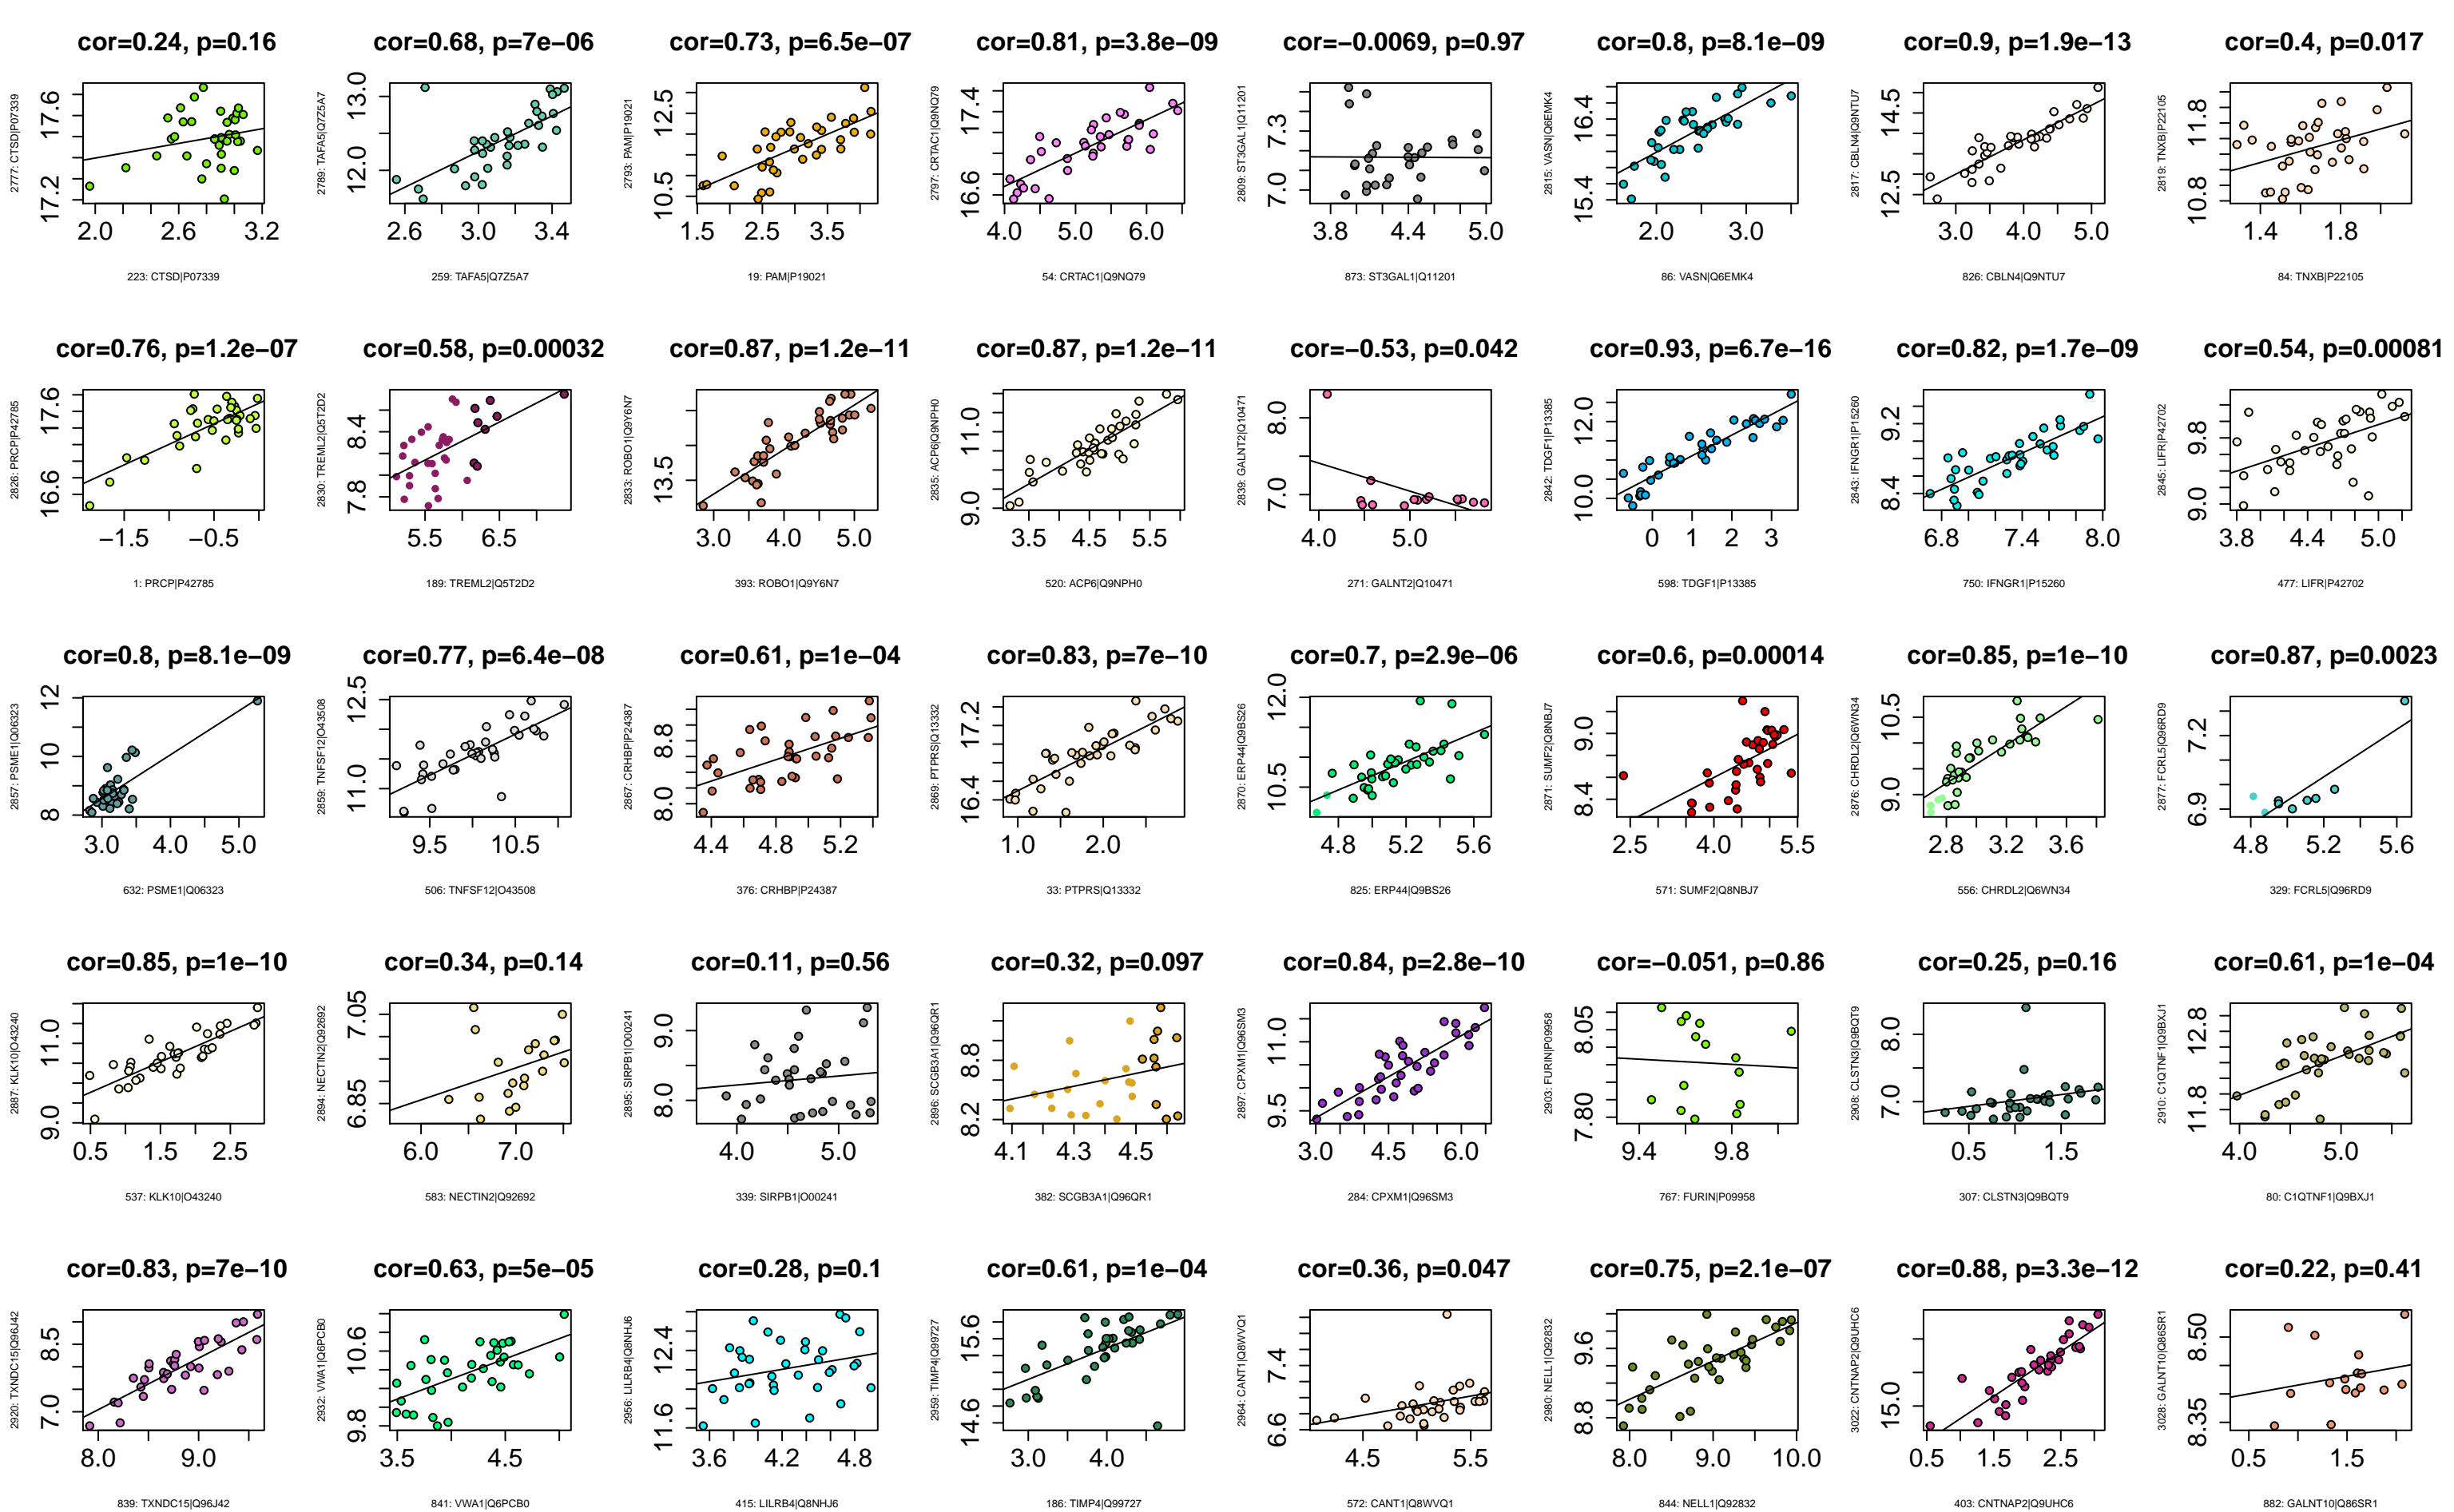

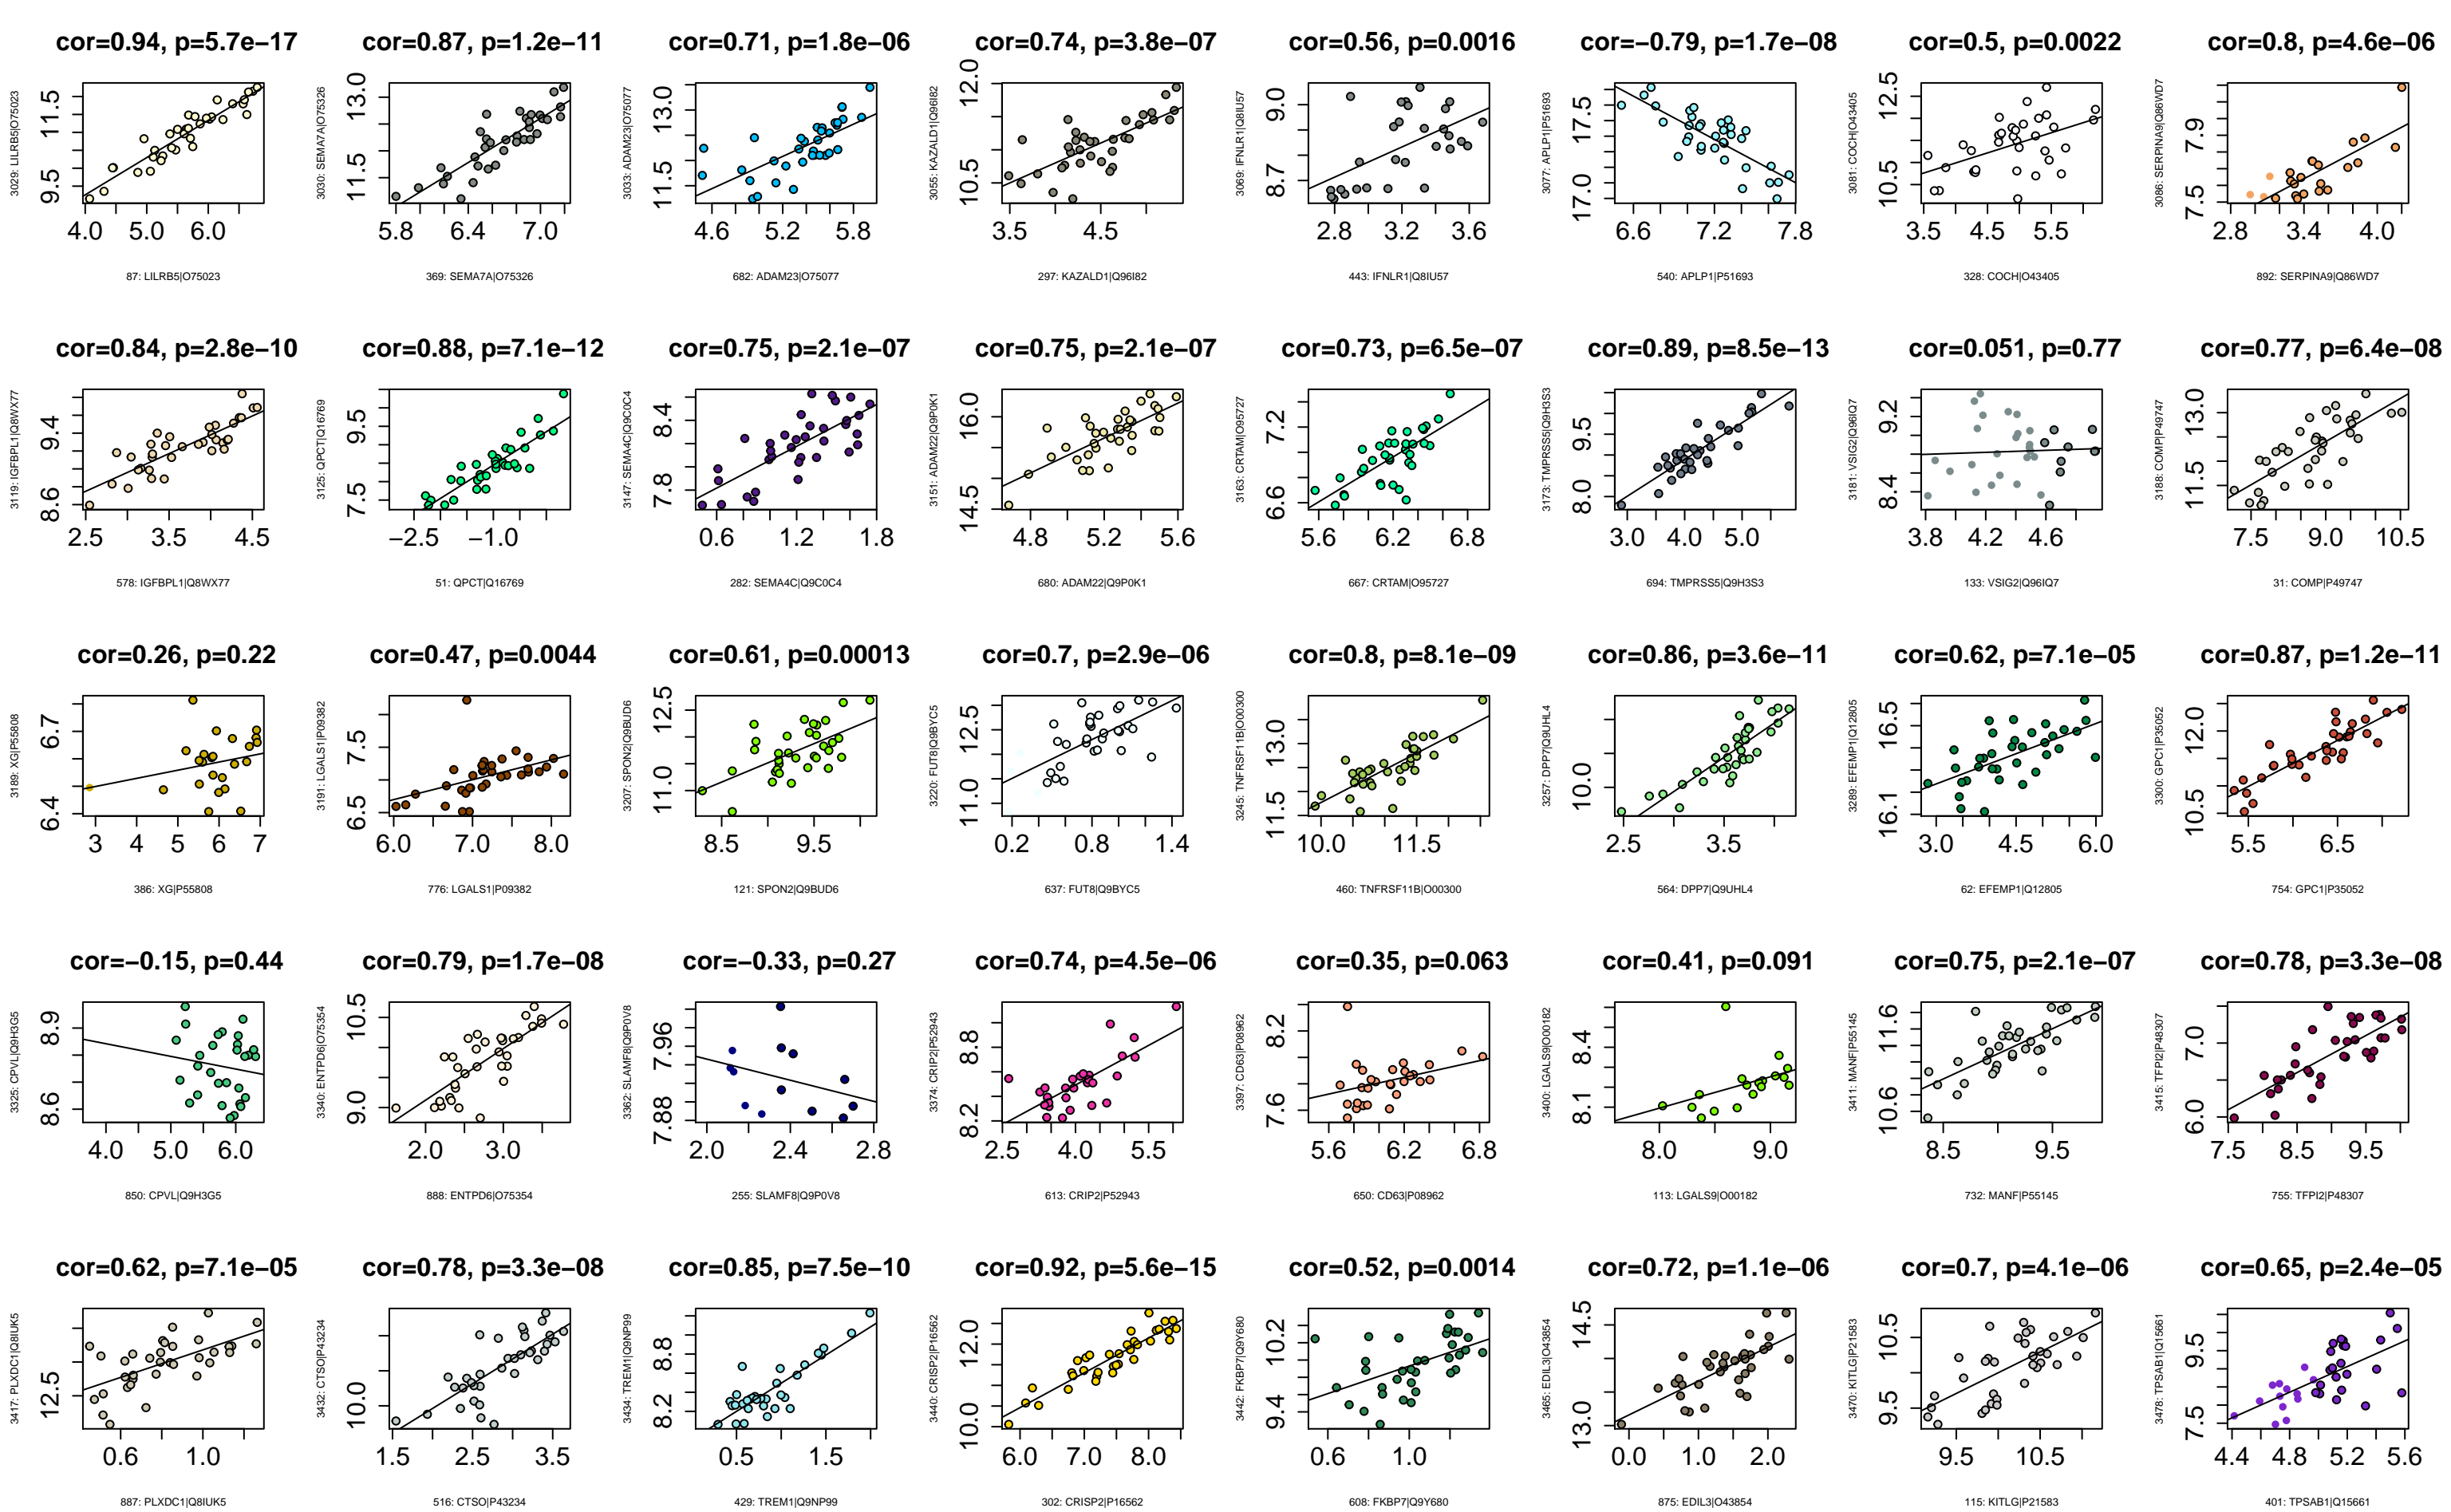



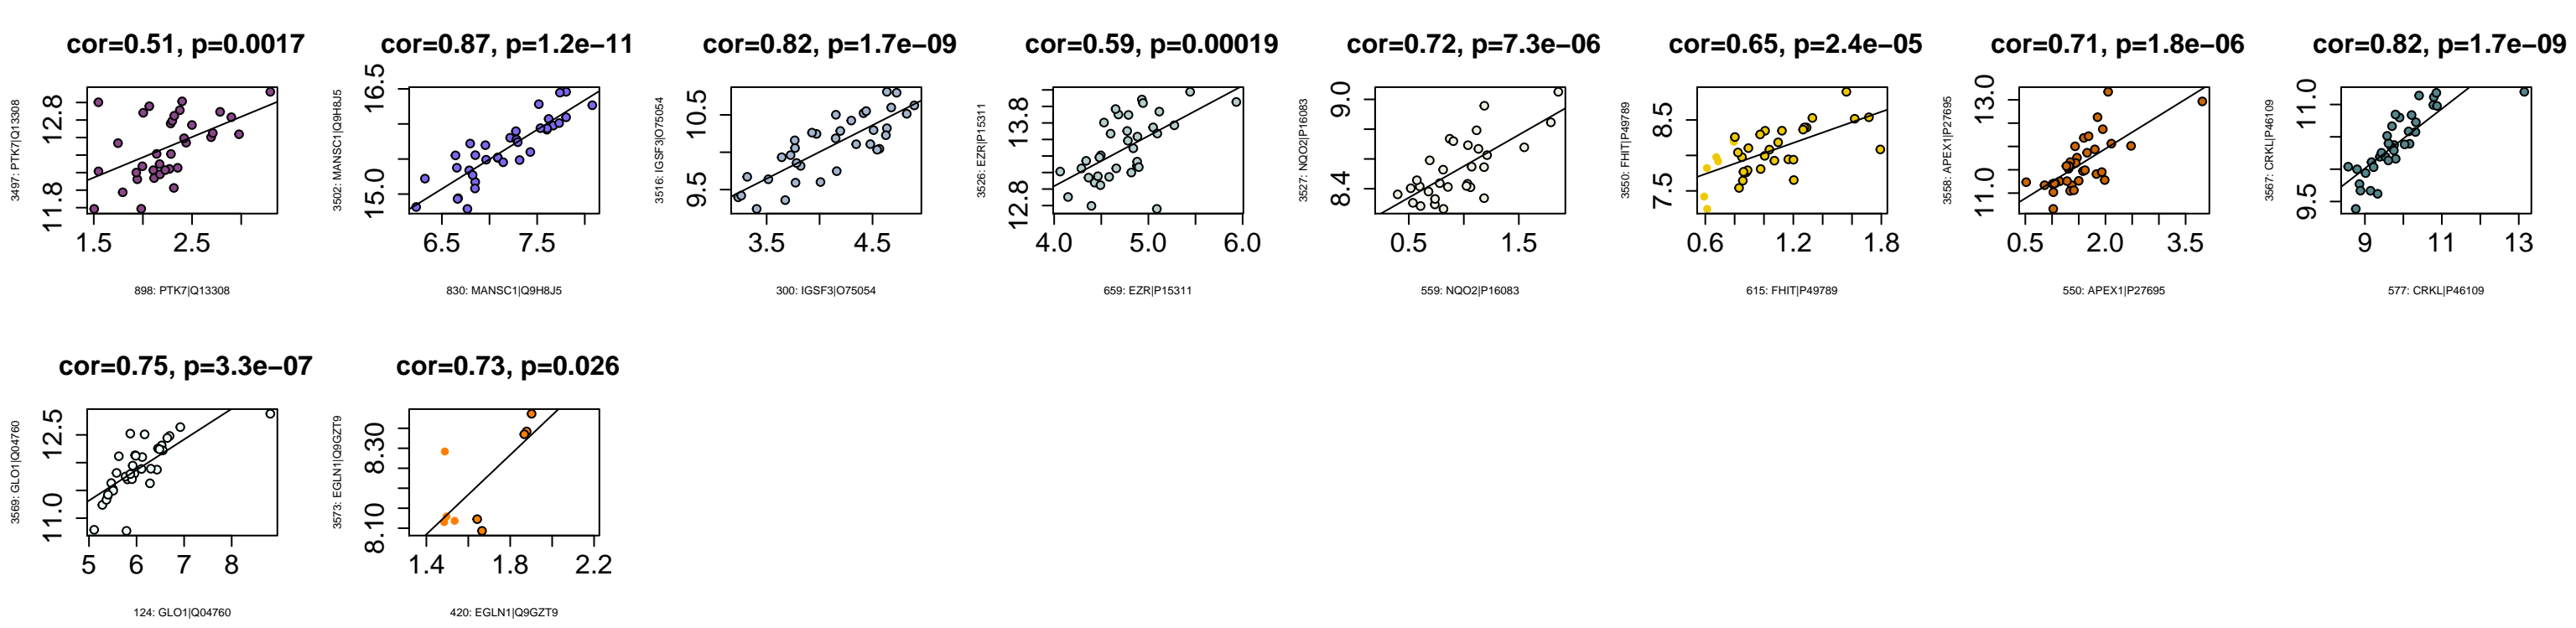

1418: IL12A|P29459,SLO21086@IL12A,EBB3,210533,39

**cor=0.57, p=0.00035**

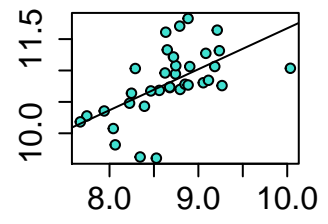

727: IL12A|P29460,P29459

**cor=0.77, p=1e-06**

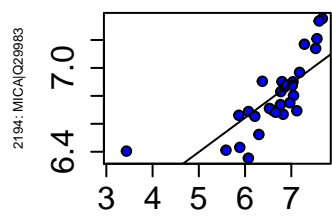

797: MICA|Q29983,Q29980

# Ontology Types

- Biological Process
- Molecular Function
- Cellular Component

**M1 turquoise**

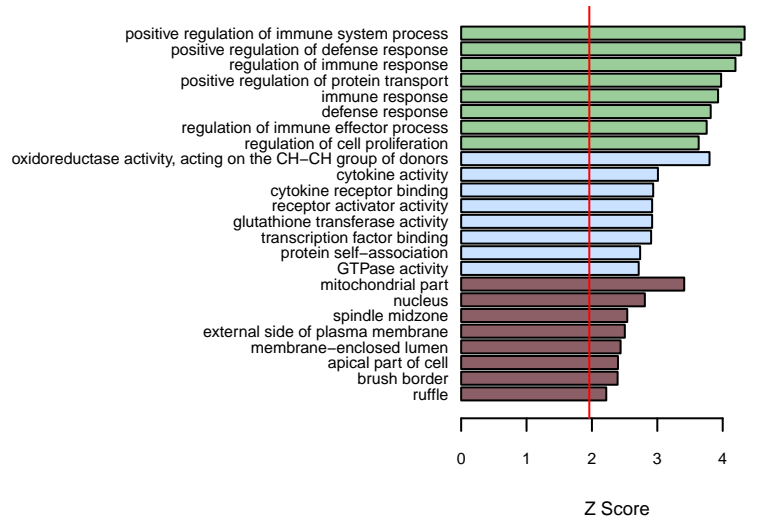

**M2 blue**

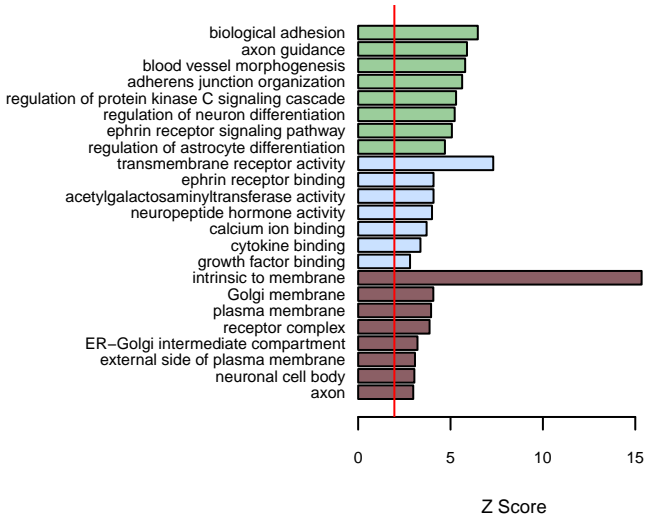

**M3 brown**

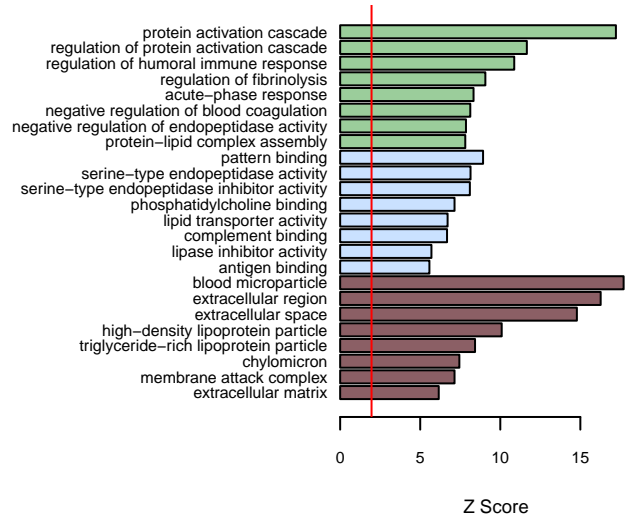

**M4 yellow**

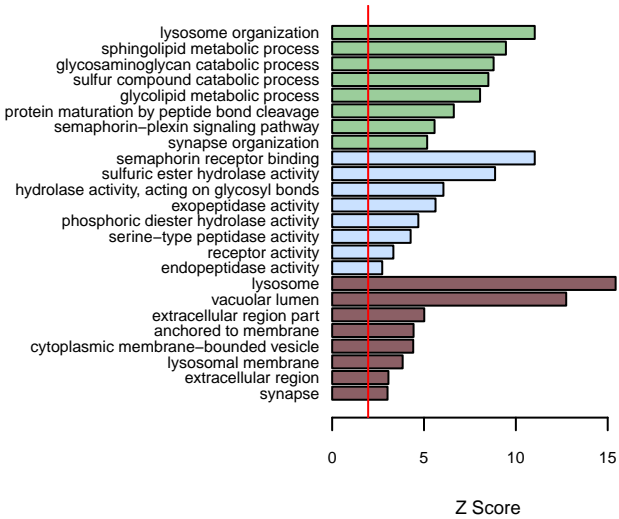

**M5 green**

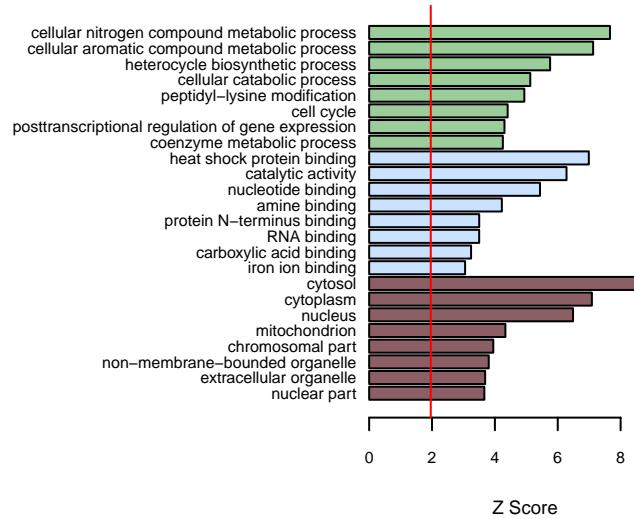

**M6 red**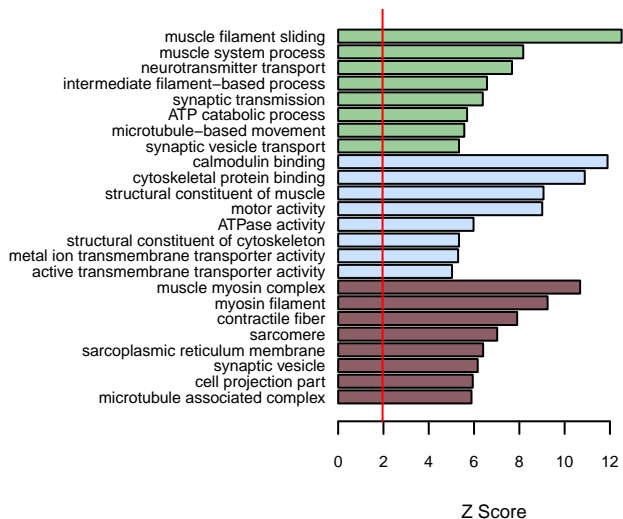**M7 black**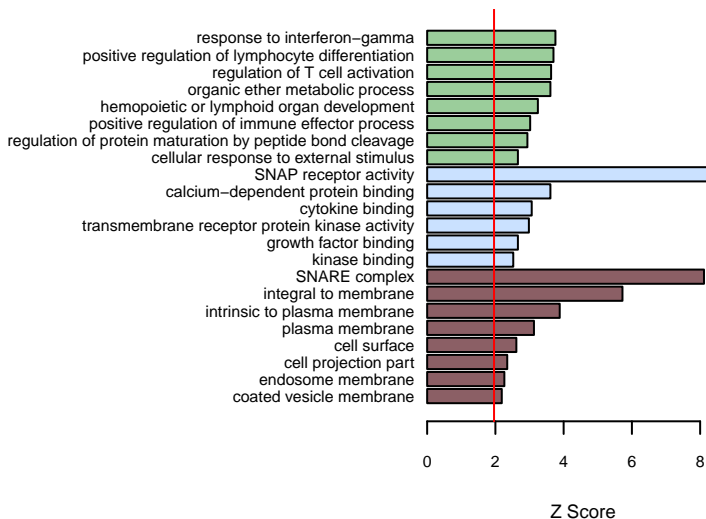**M8 pink**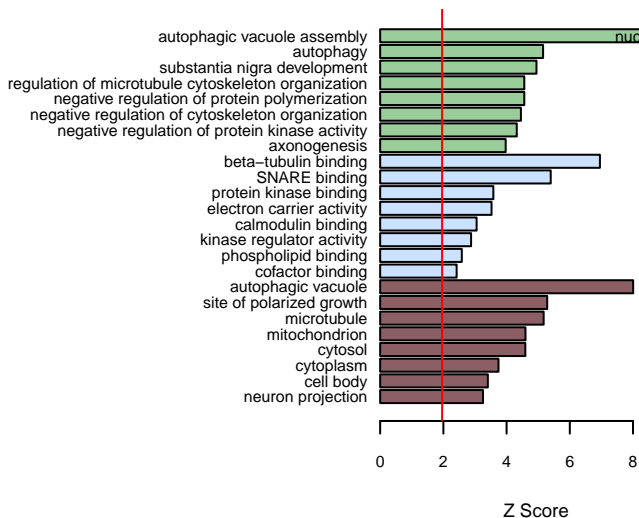**M9 magenta**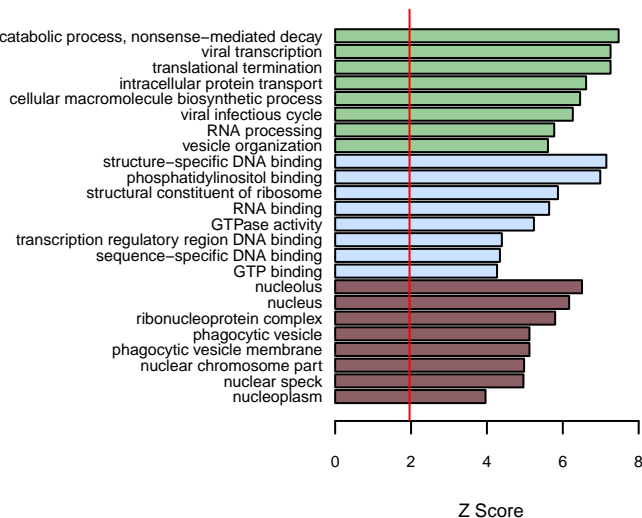**M10 purple**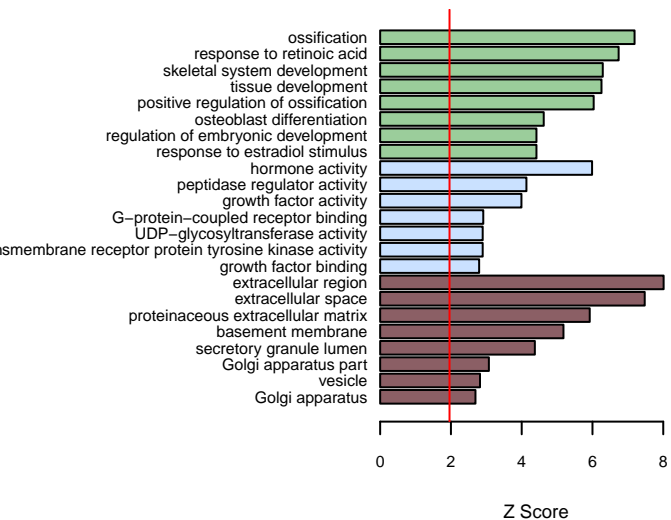**M11 greenyellow**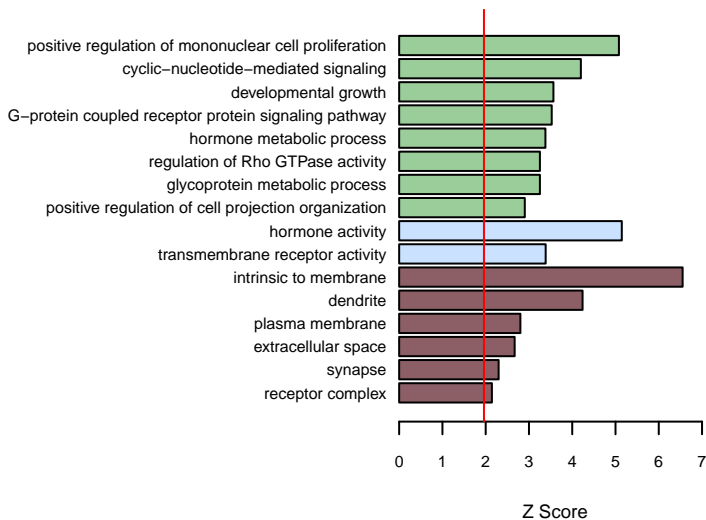

**M12 tan**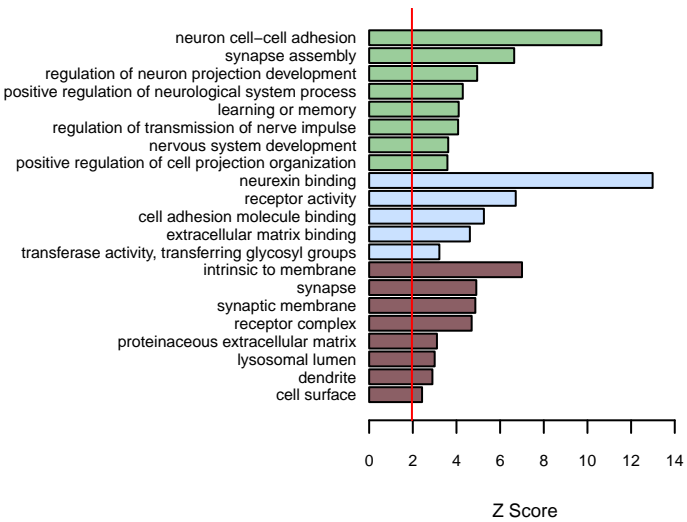**M13 salmon**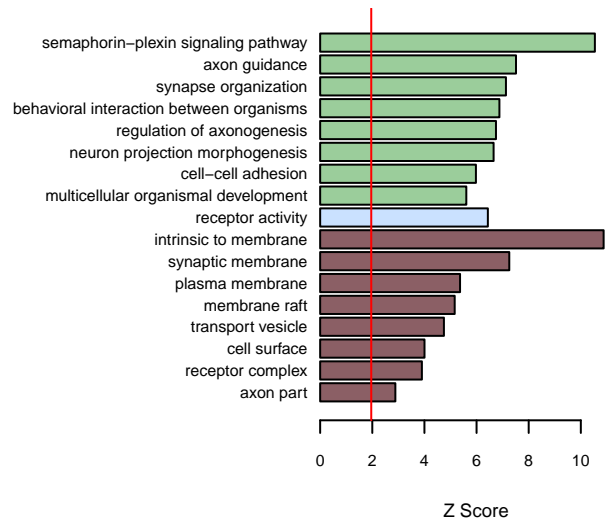**M14 cyan**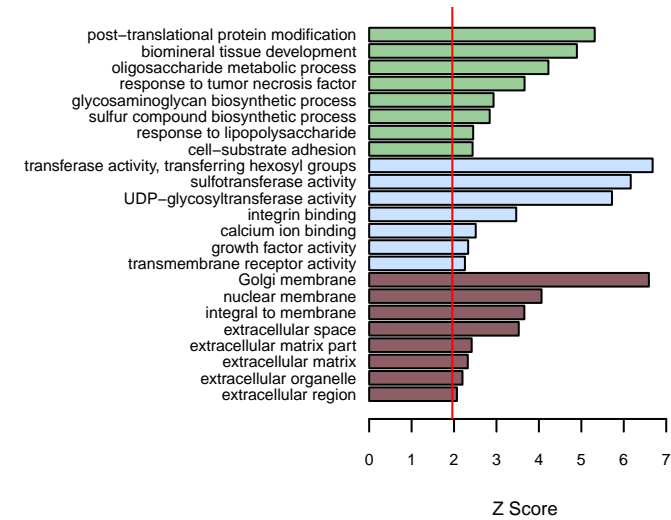**M15 midnightblue**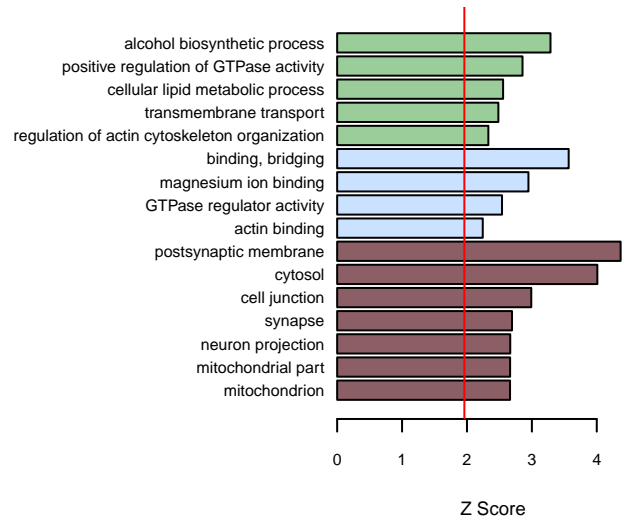**M16 lightcyan**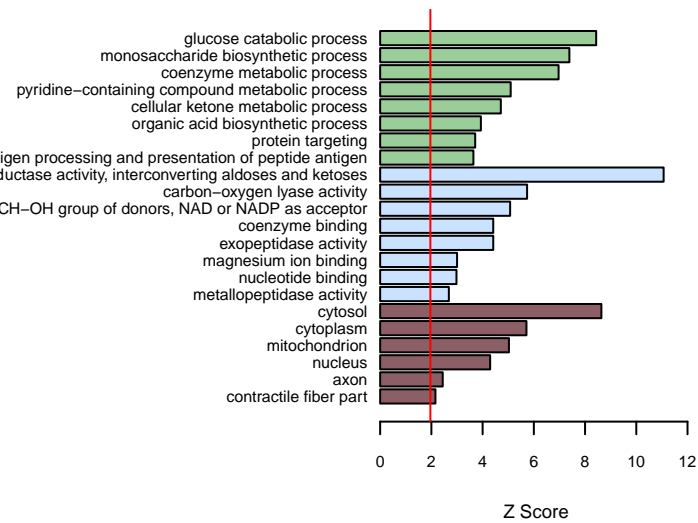**M17 grey60**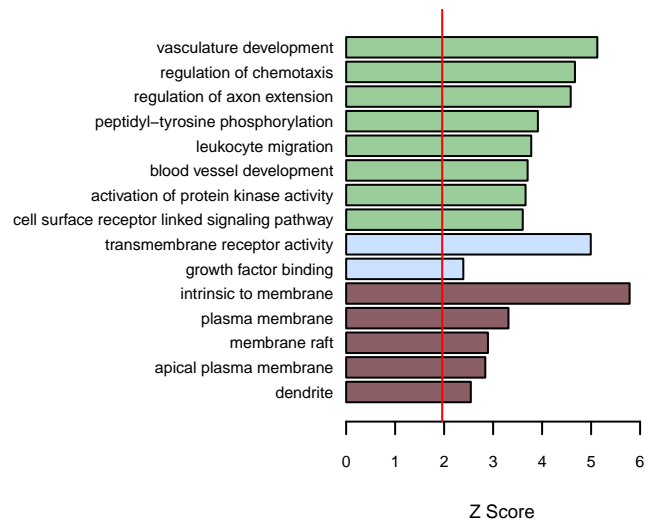

**M18 lightgreen**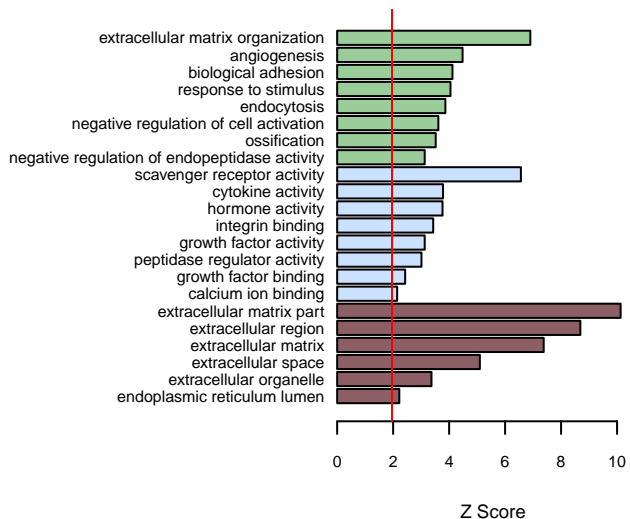**M19 lightyellow**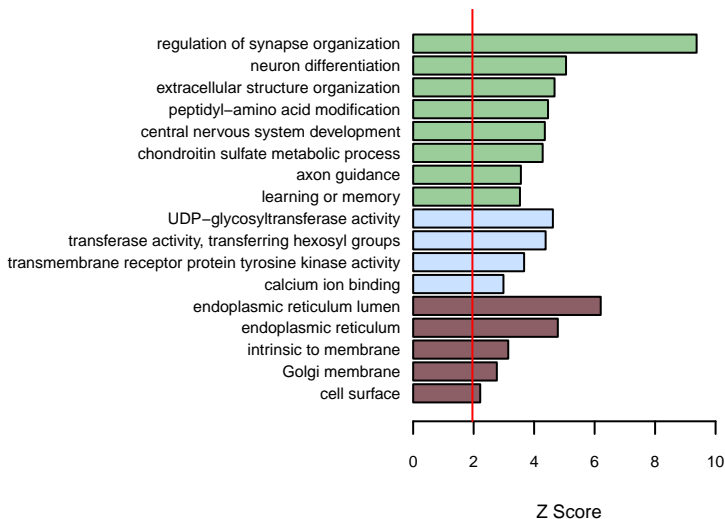**M20 royalblue**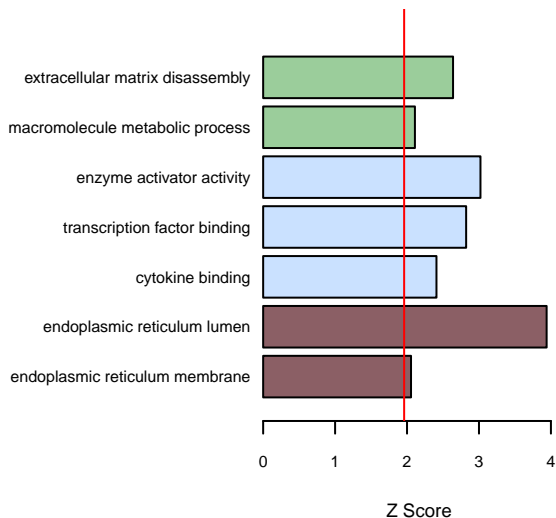**M21 darkred**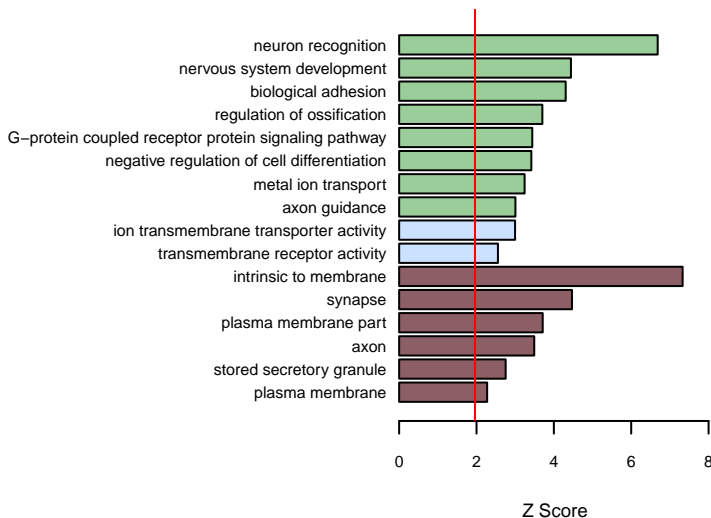**M22 darkgreen**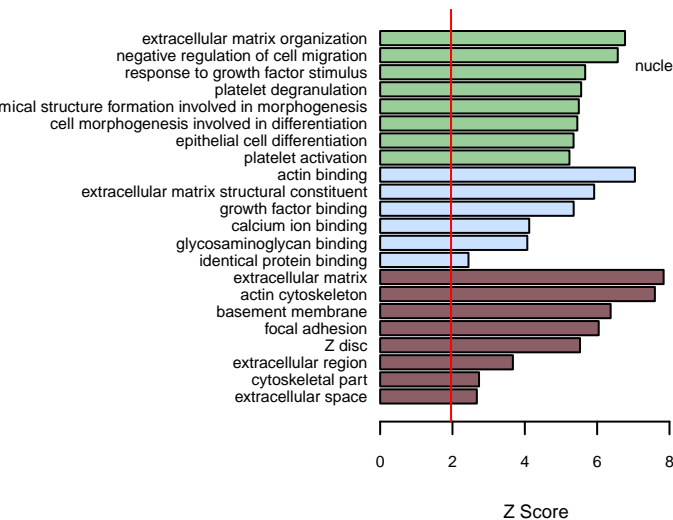**M23 darkturquoise**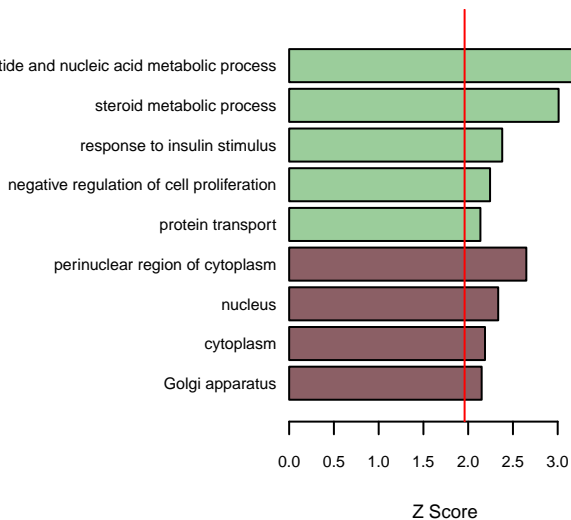

**M24 darkgrey**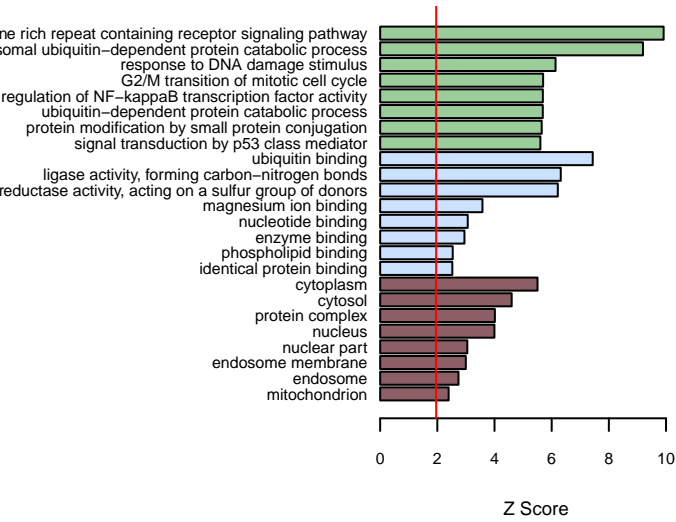**M25 orange**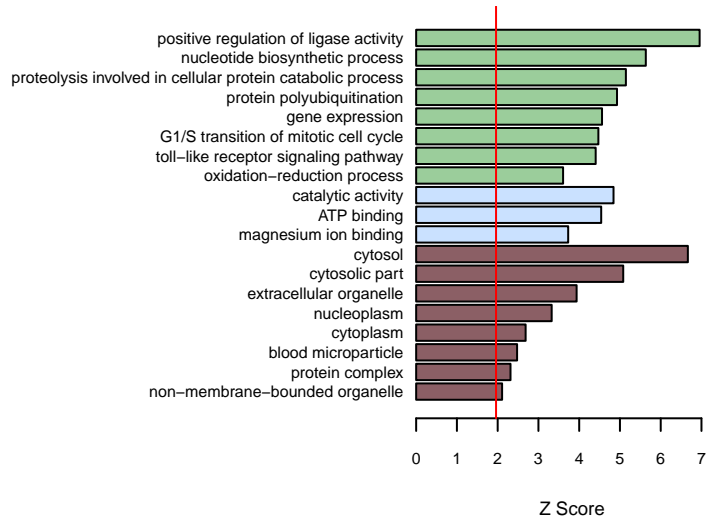**M26 darkorange**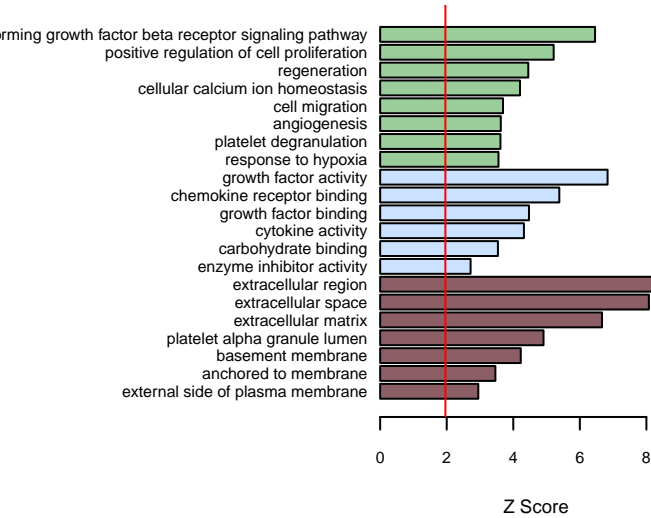**M27 white**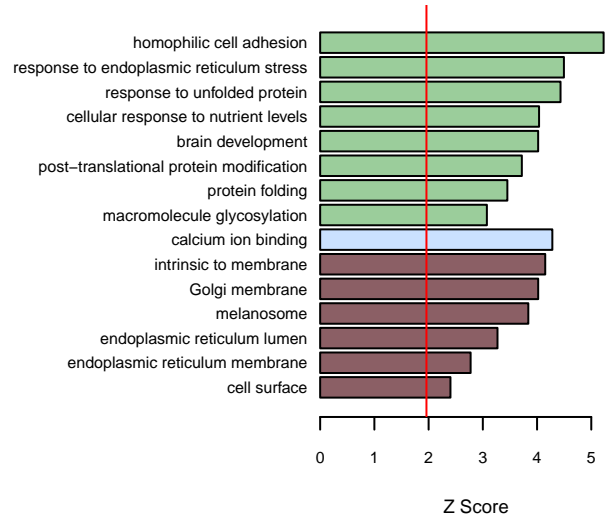**M28 skyblue**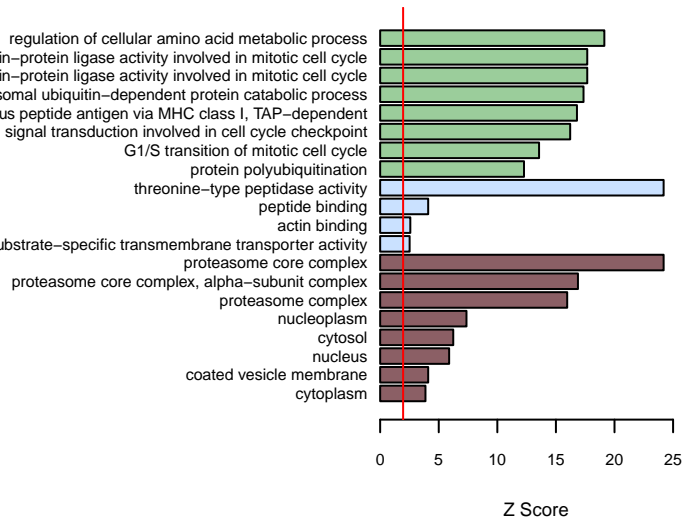**M29 saddlebrown**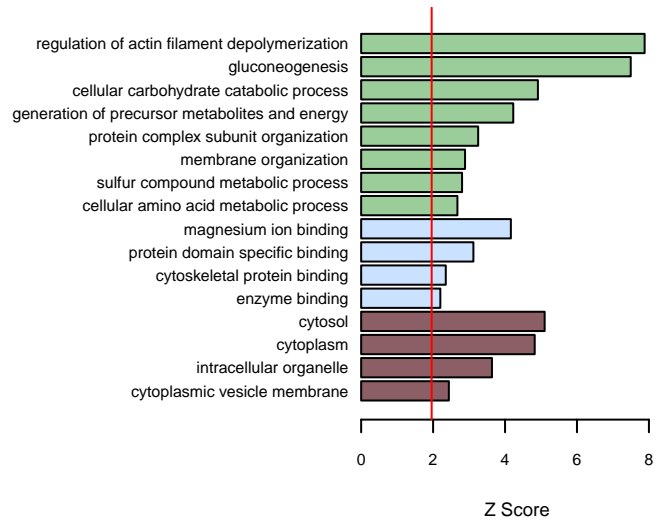

**M30 steelblue**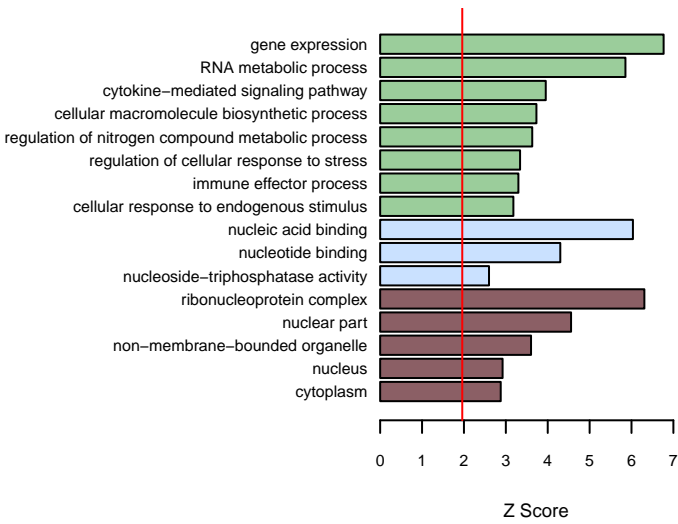**M31 paleturquoise**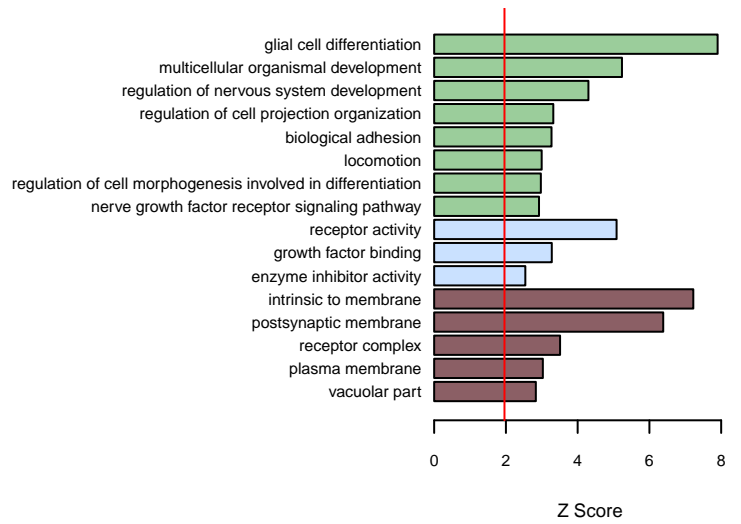**M32 violet**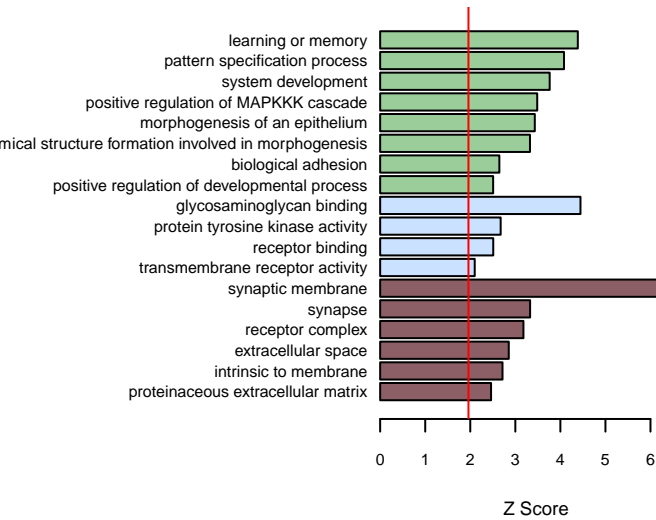**M33 darkolivegreen**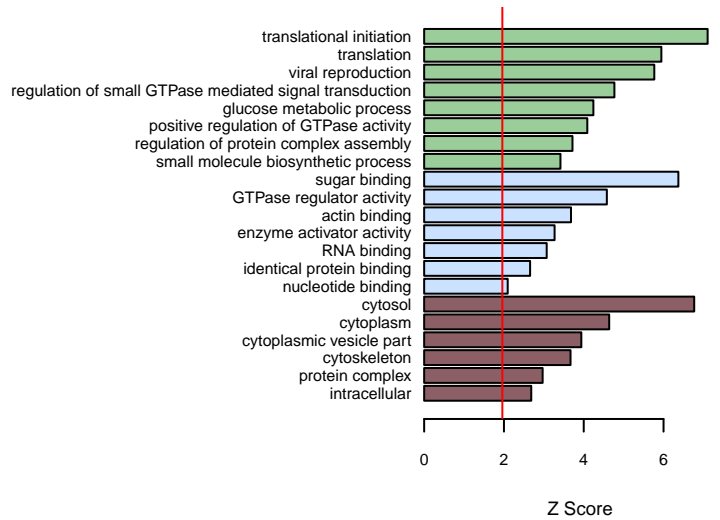**M34 darkmagenta**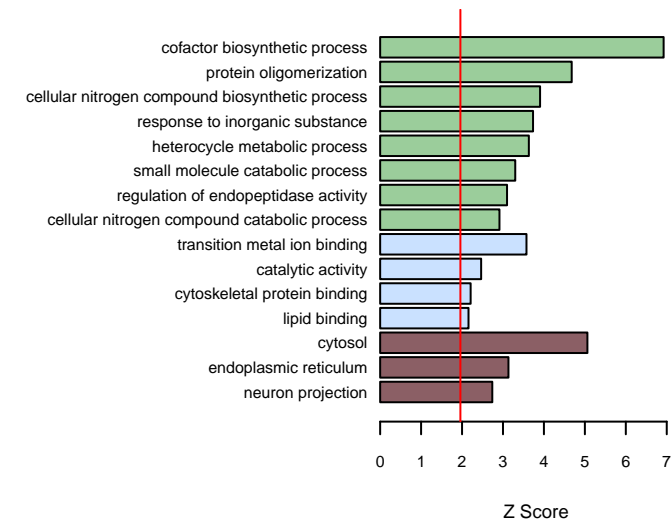**M35 sienna3**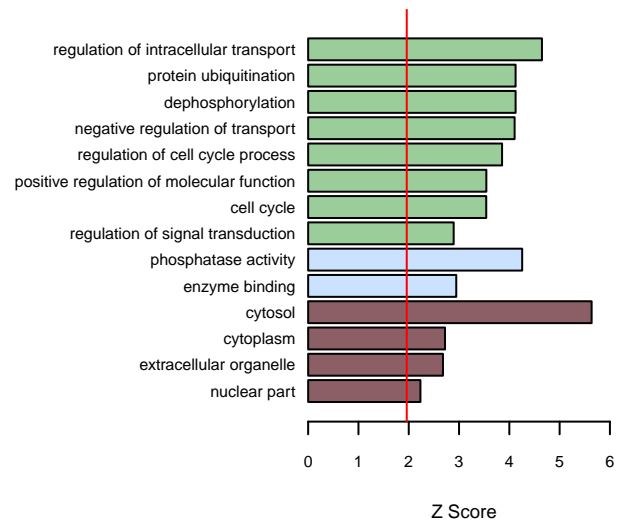



**M36 yellowgreen**

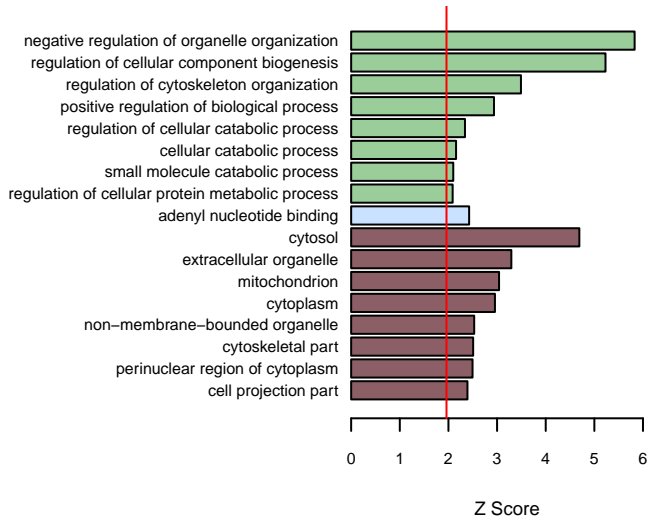

**M37 skyblue3**

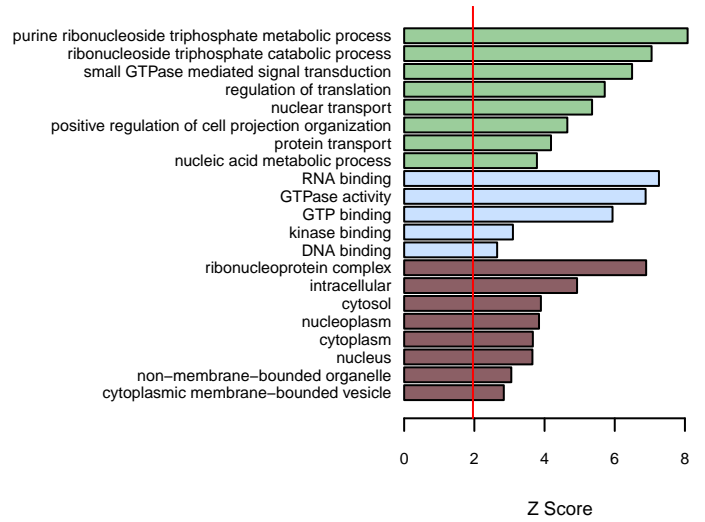

**M38 plum1**

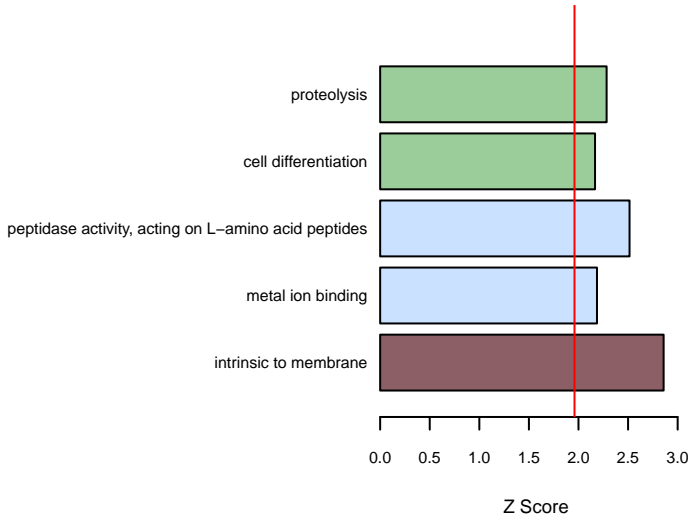

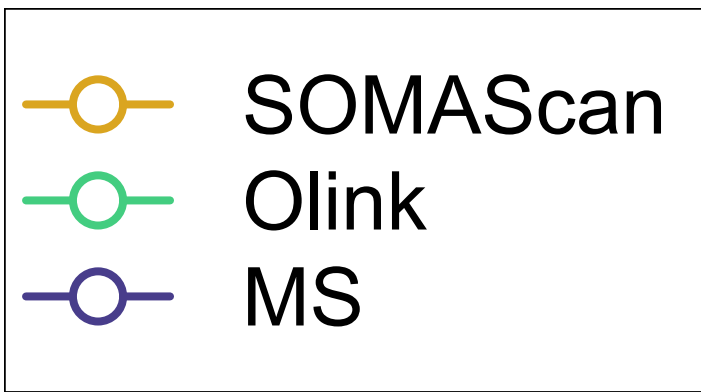



# M21 darkred module: Neuron Recognition

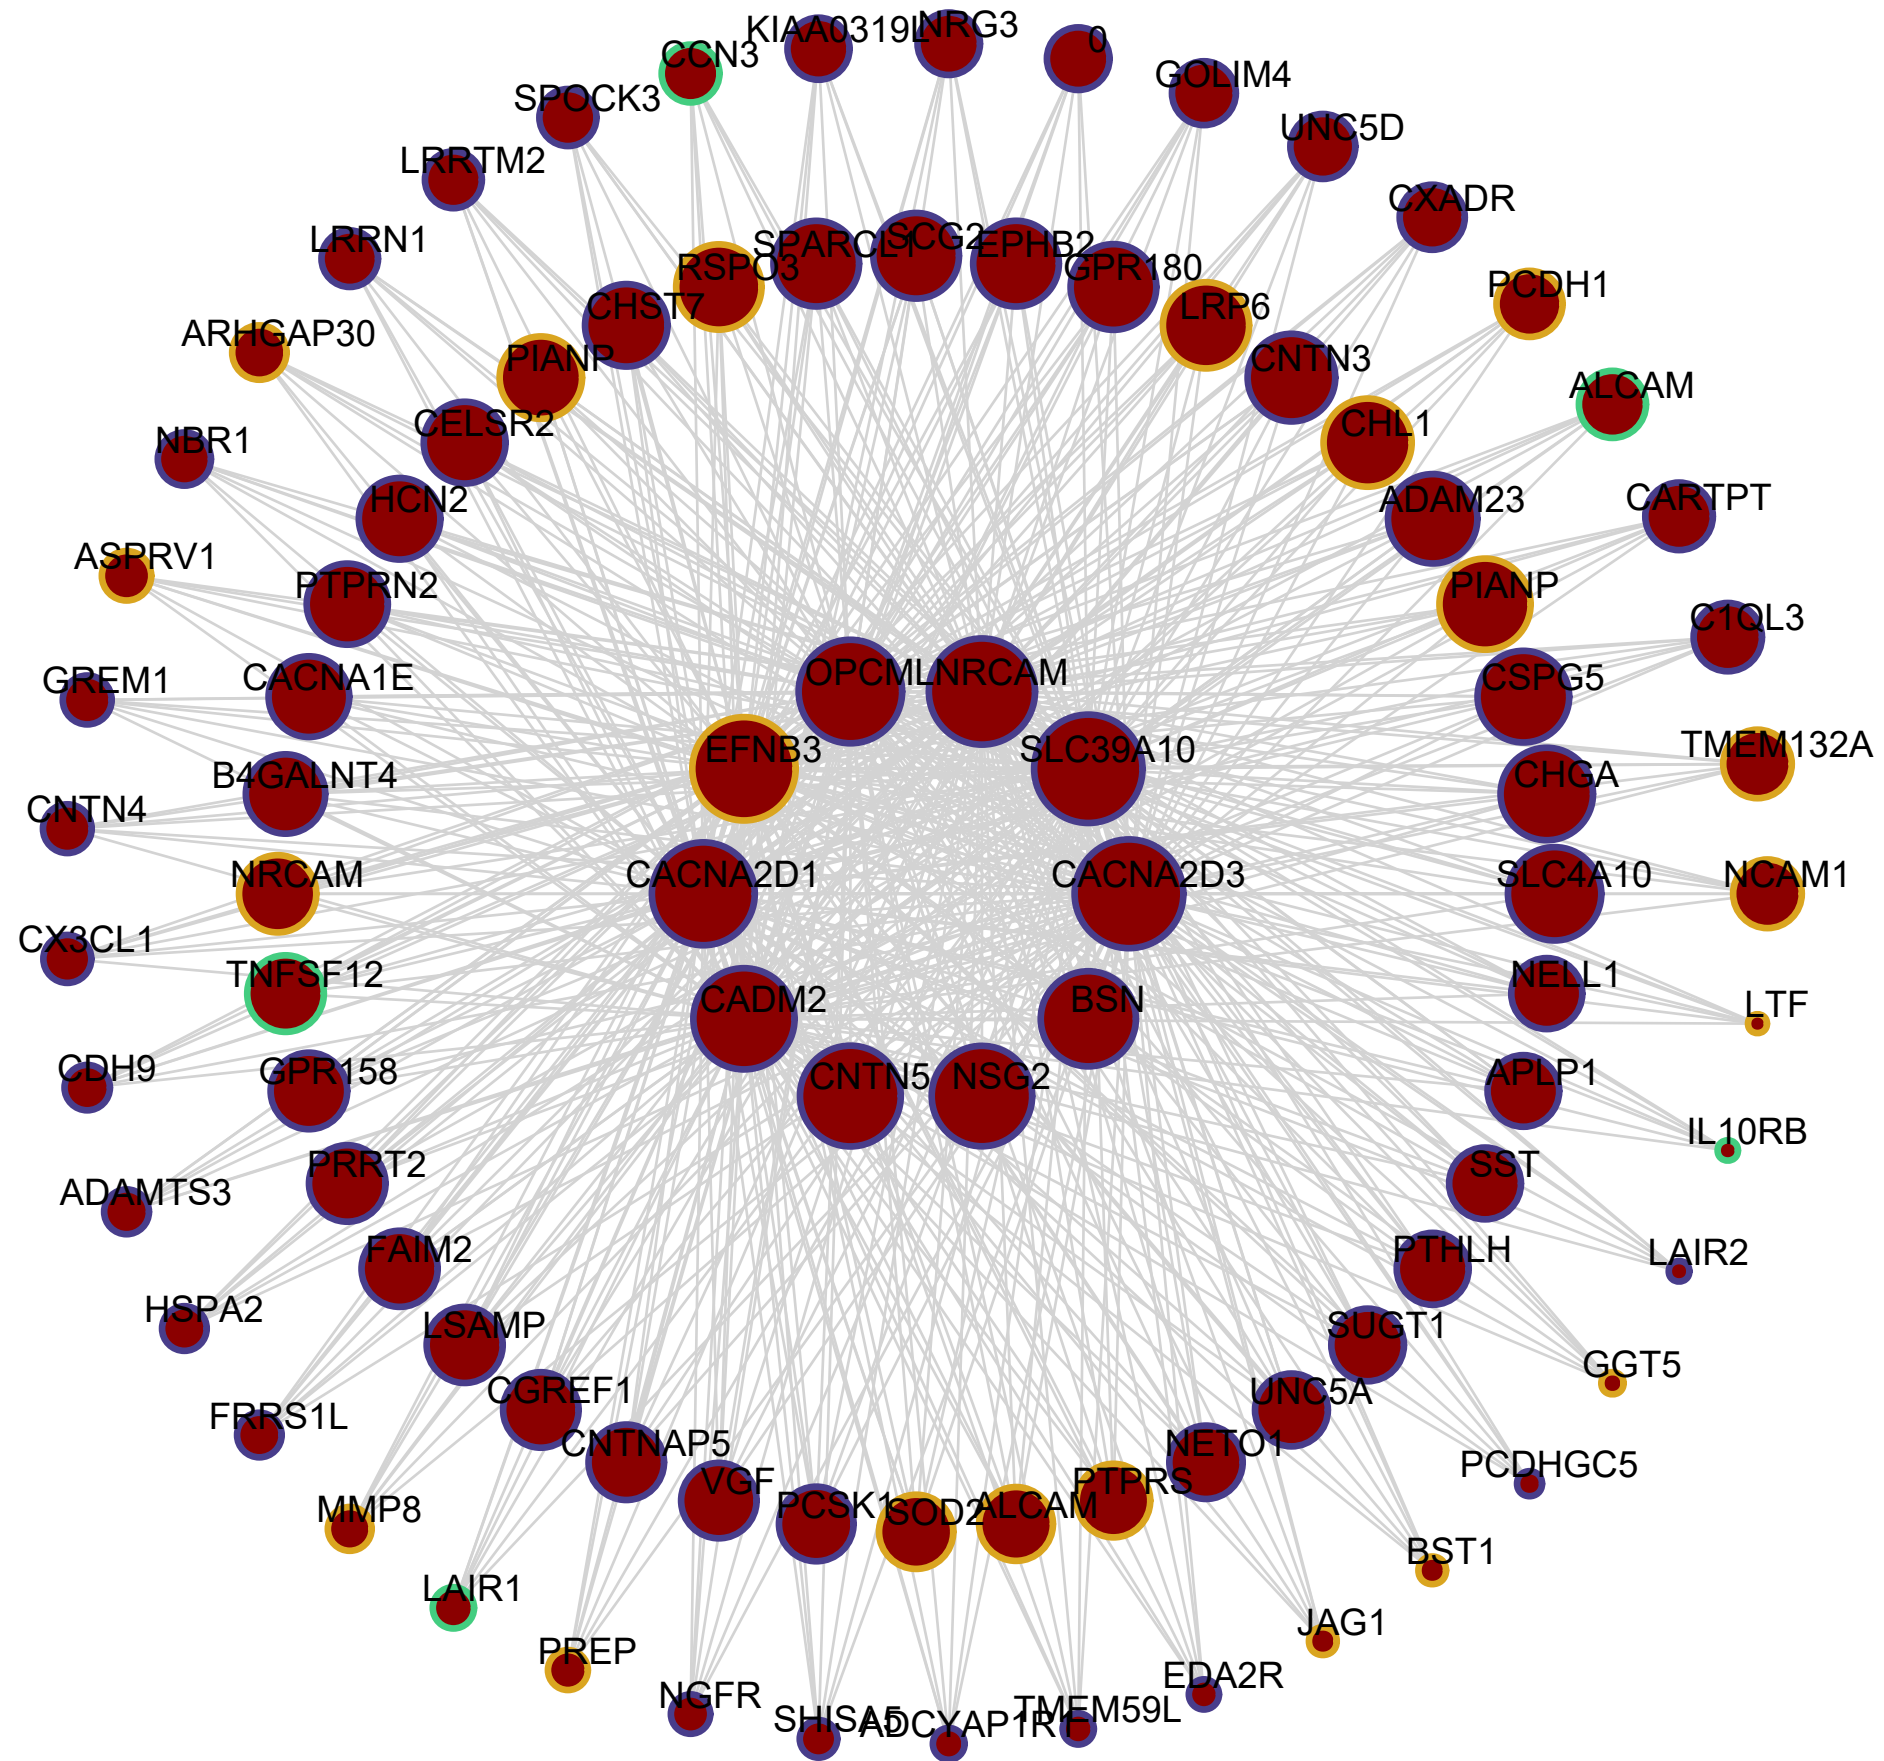

# M17 grey60 module: Ambiguous

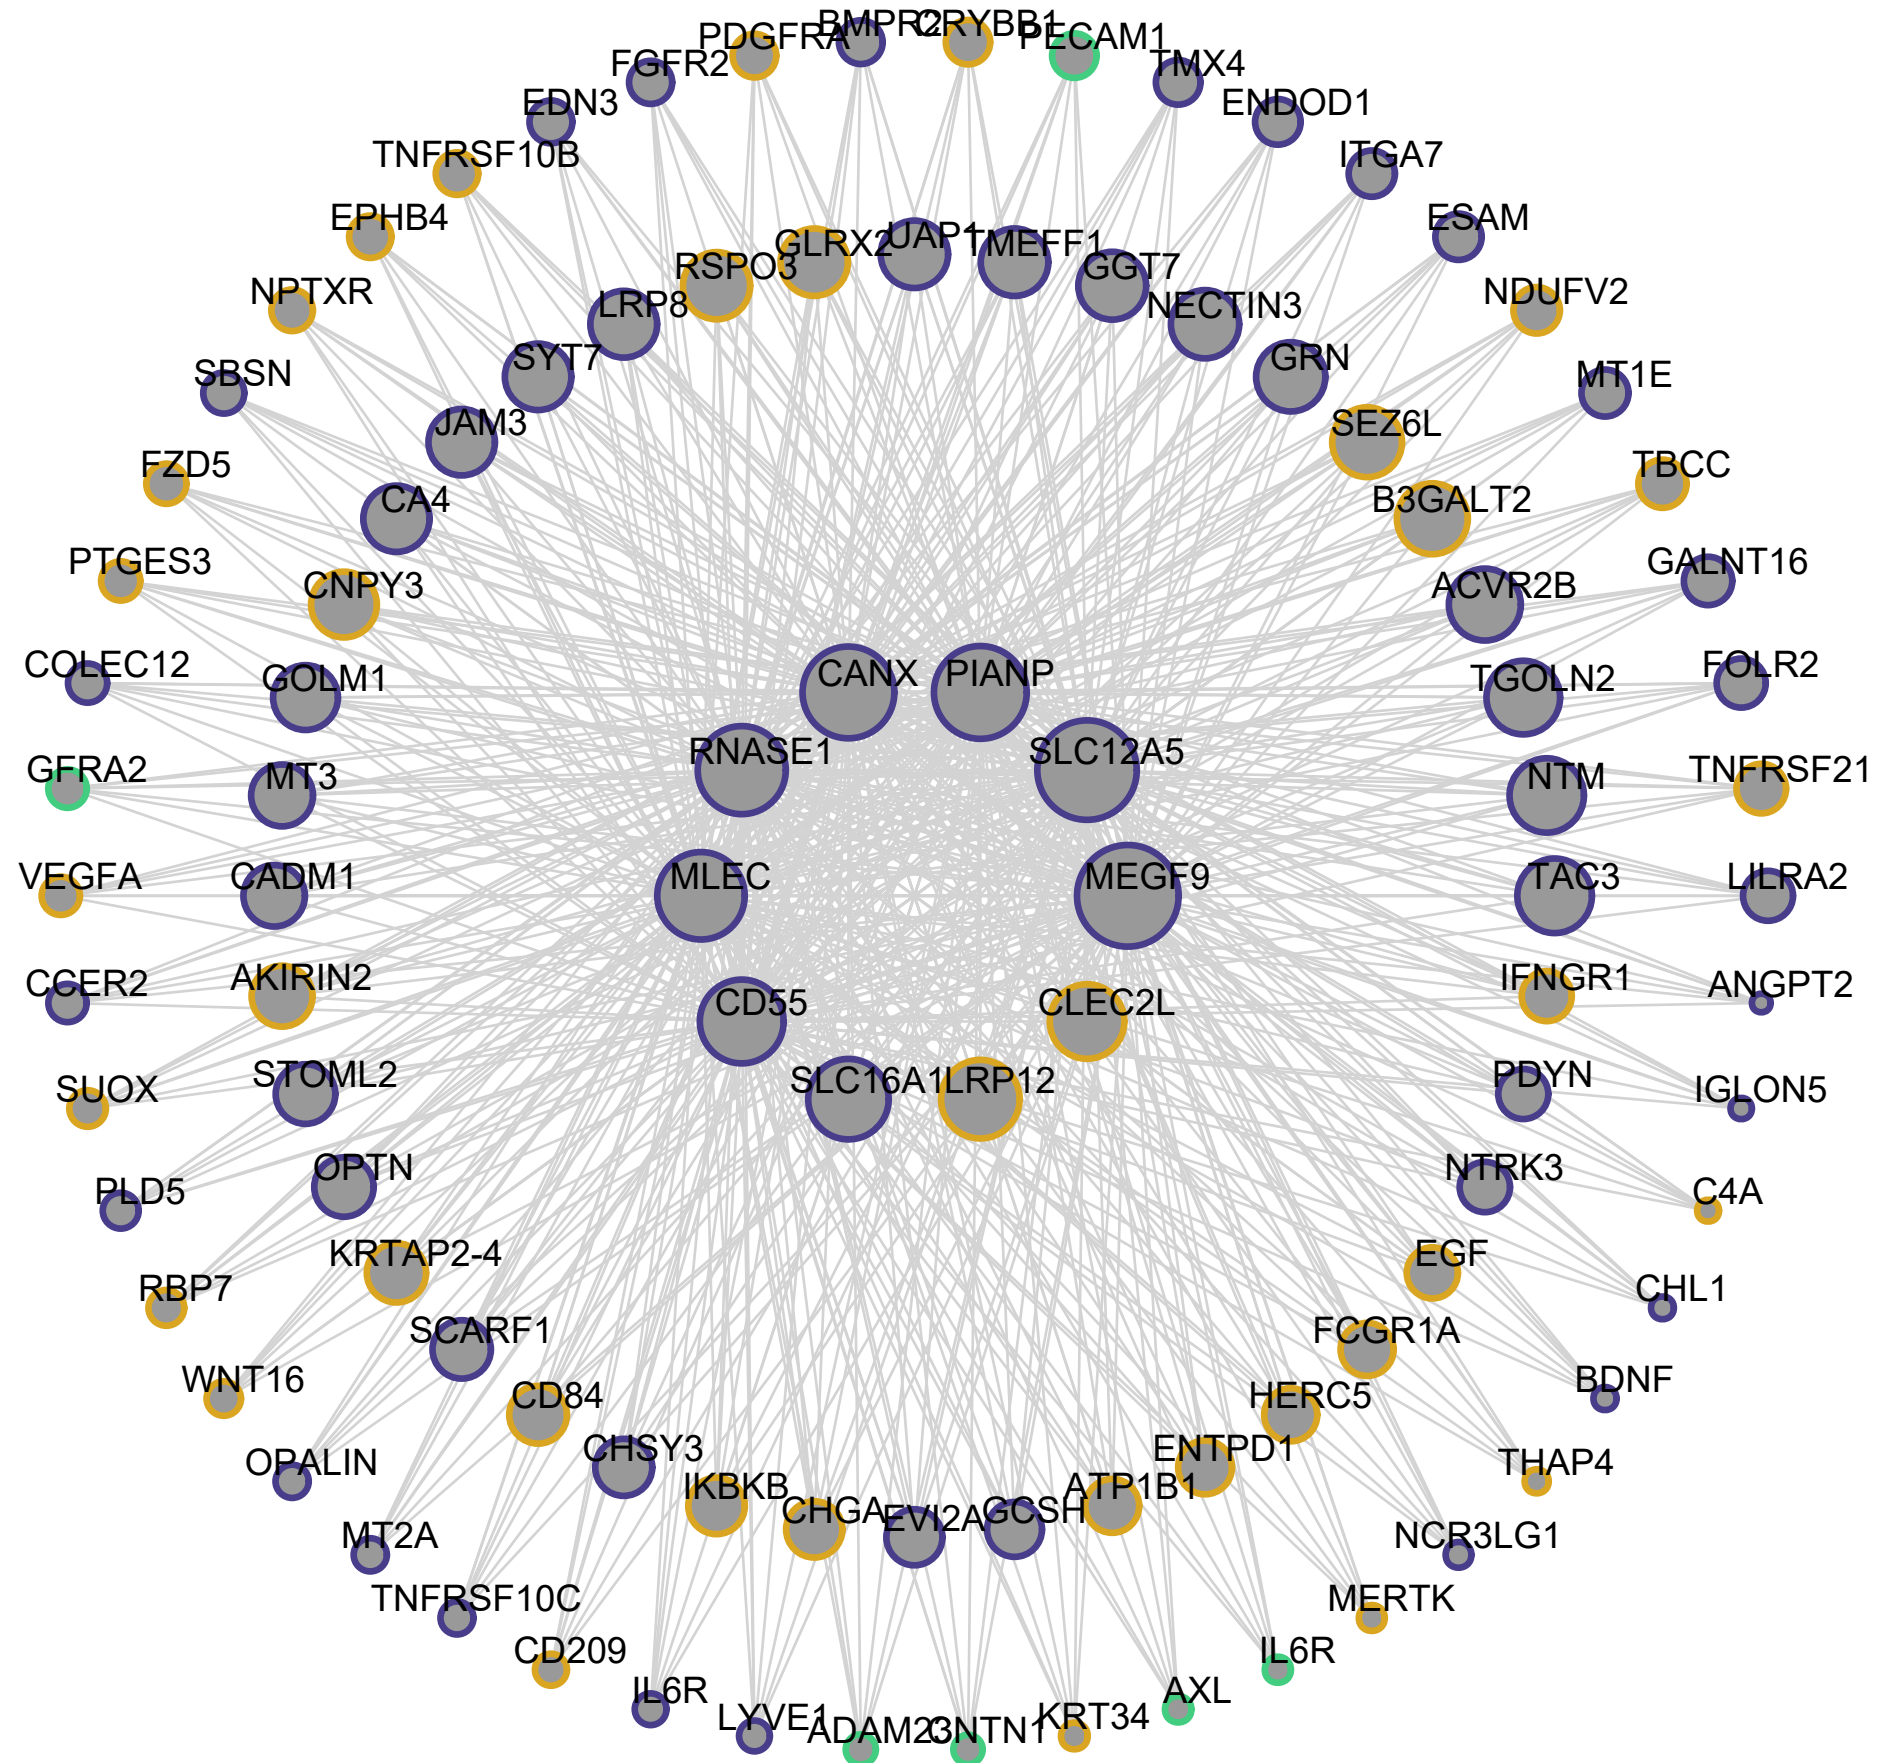

M6 red module: Muscle/Neurotransmitter Transport

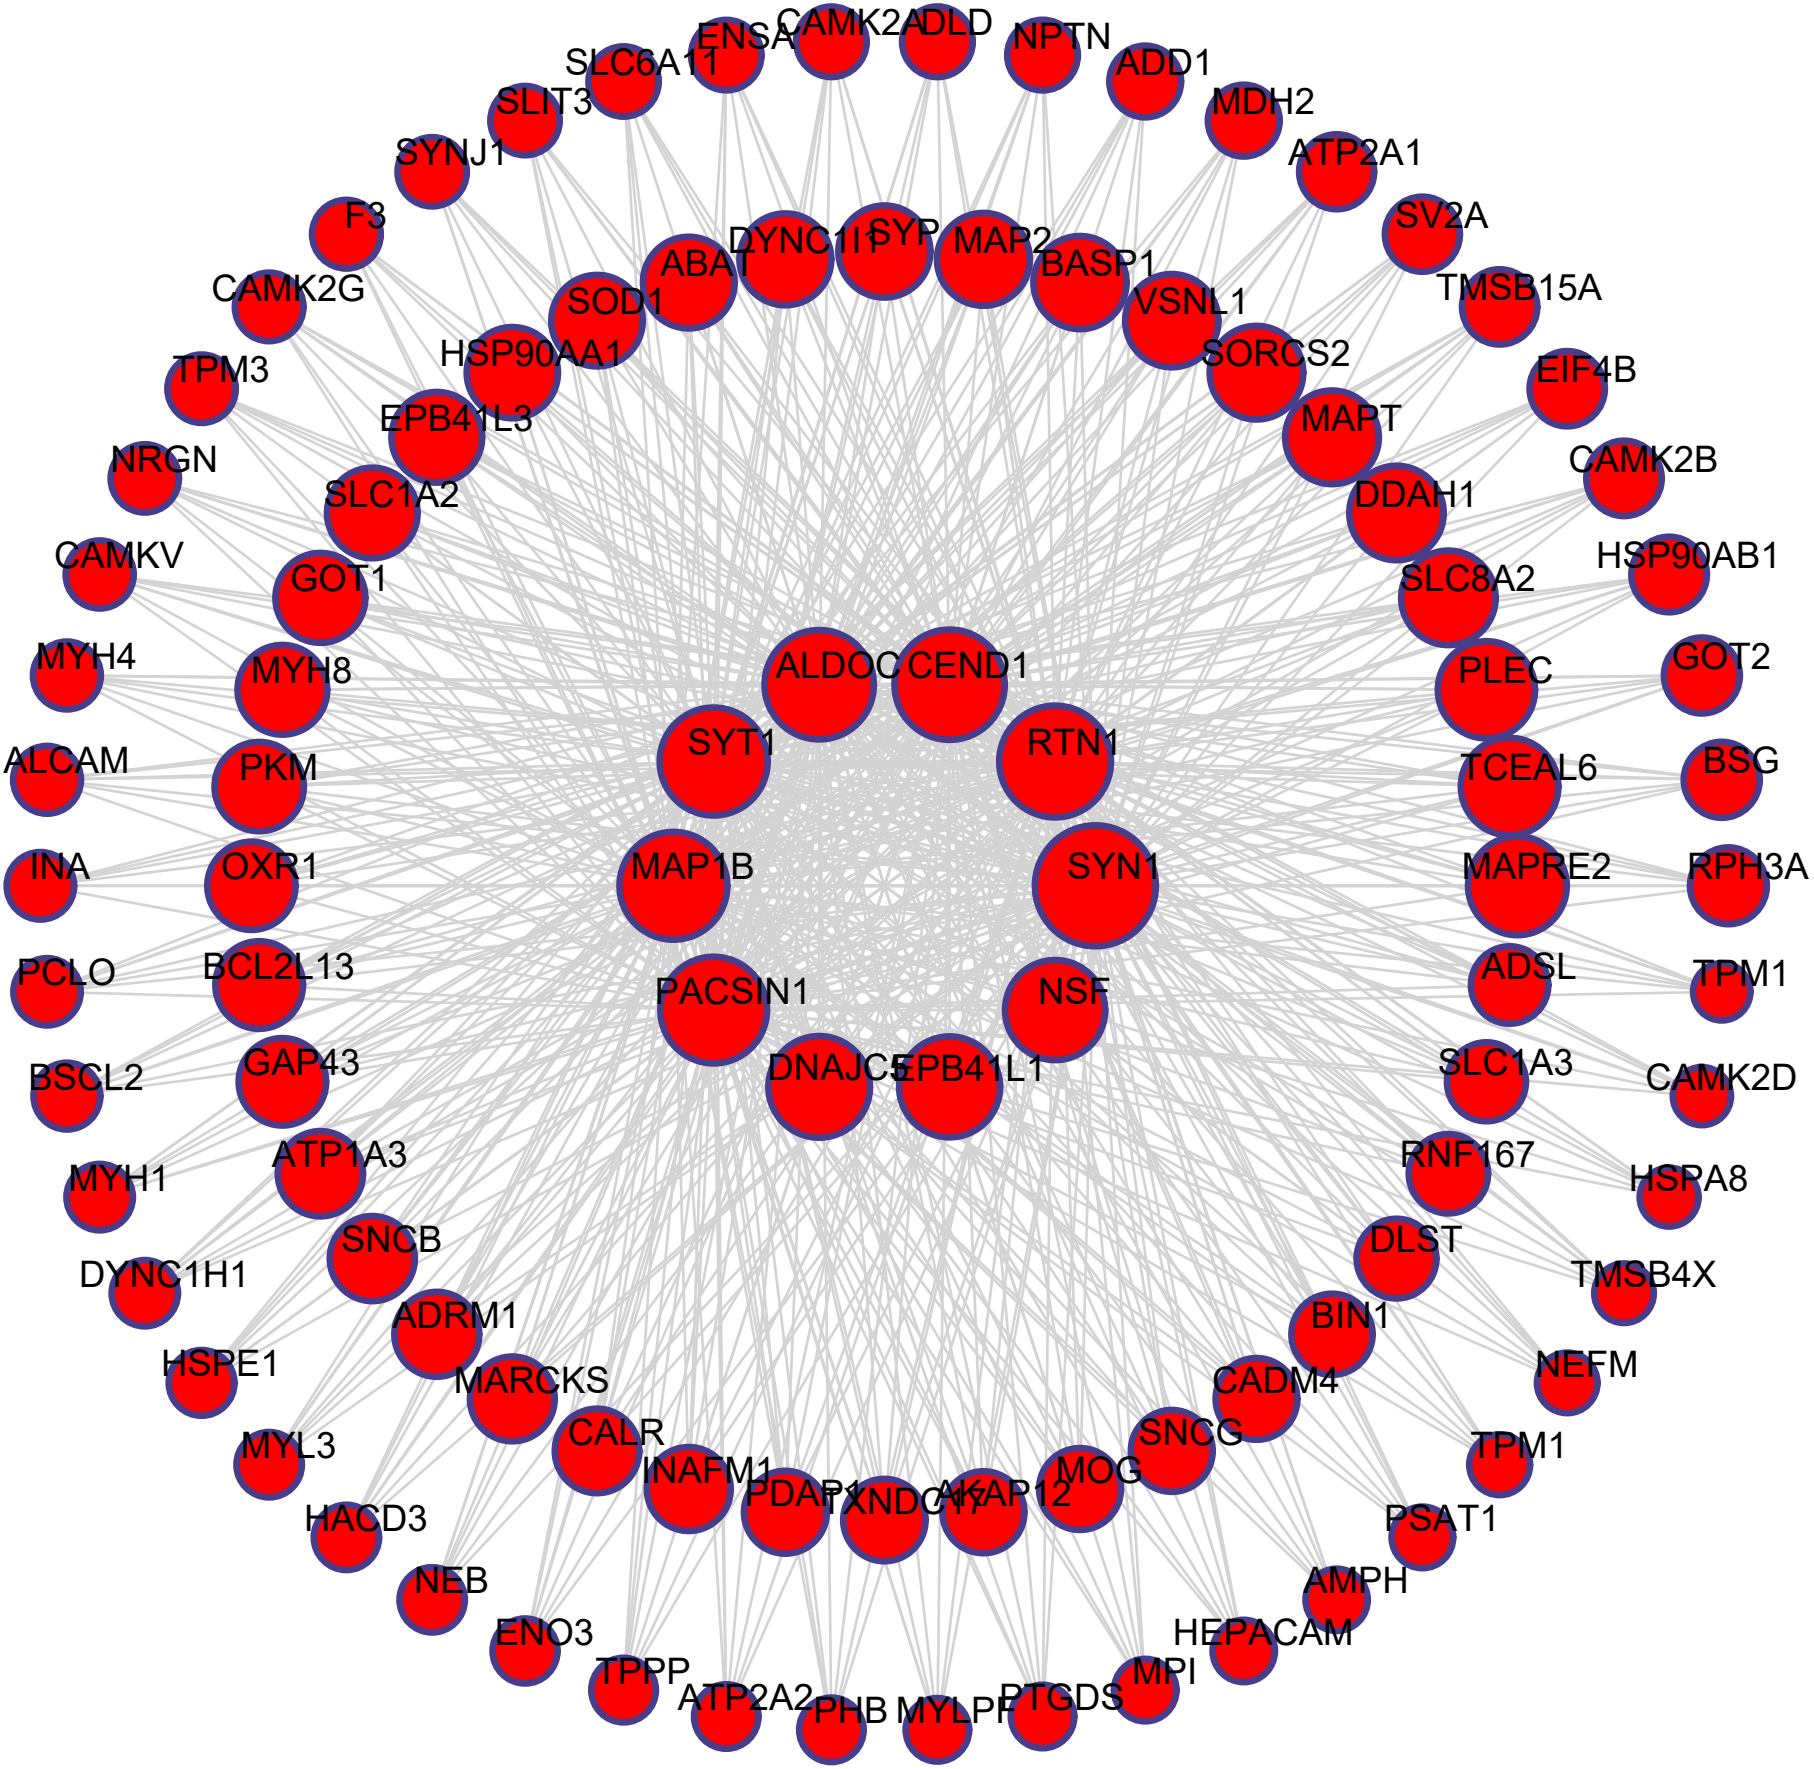

# M15 midnightblue module: Post-Synaptic Membrane

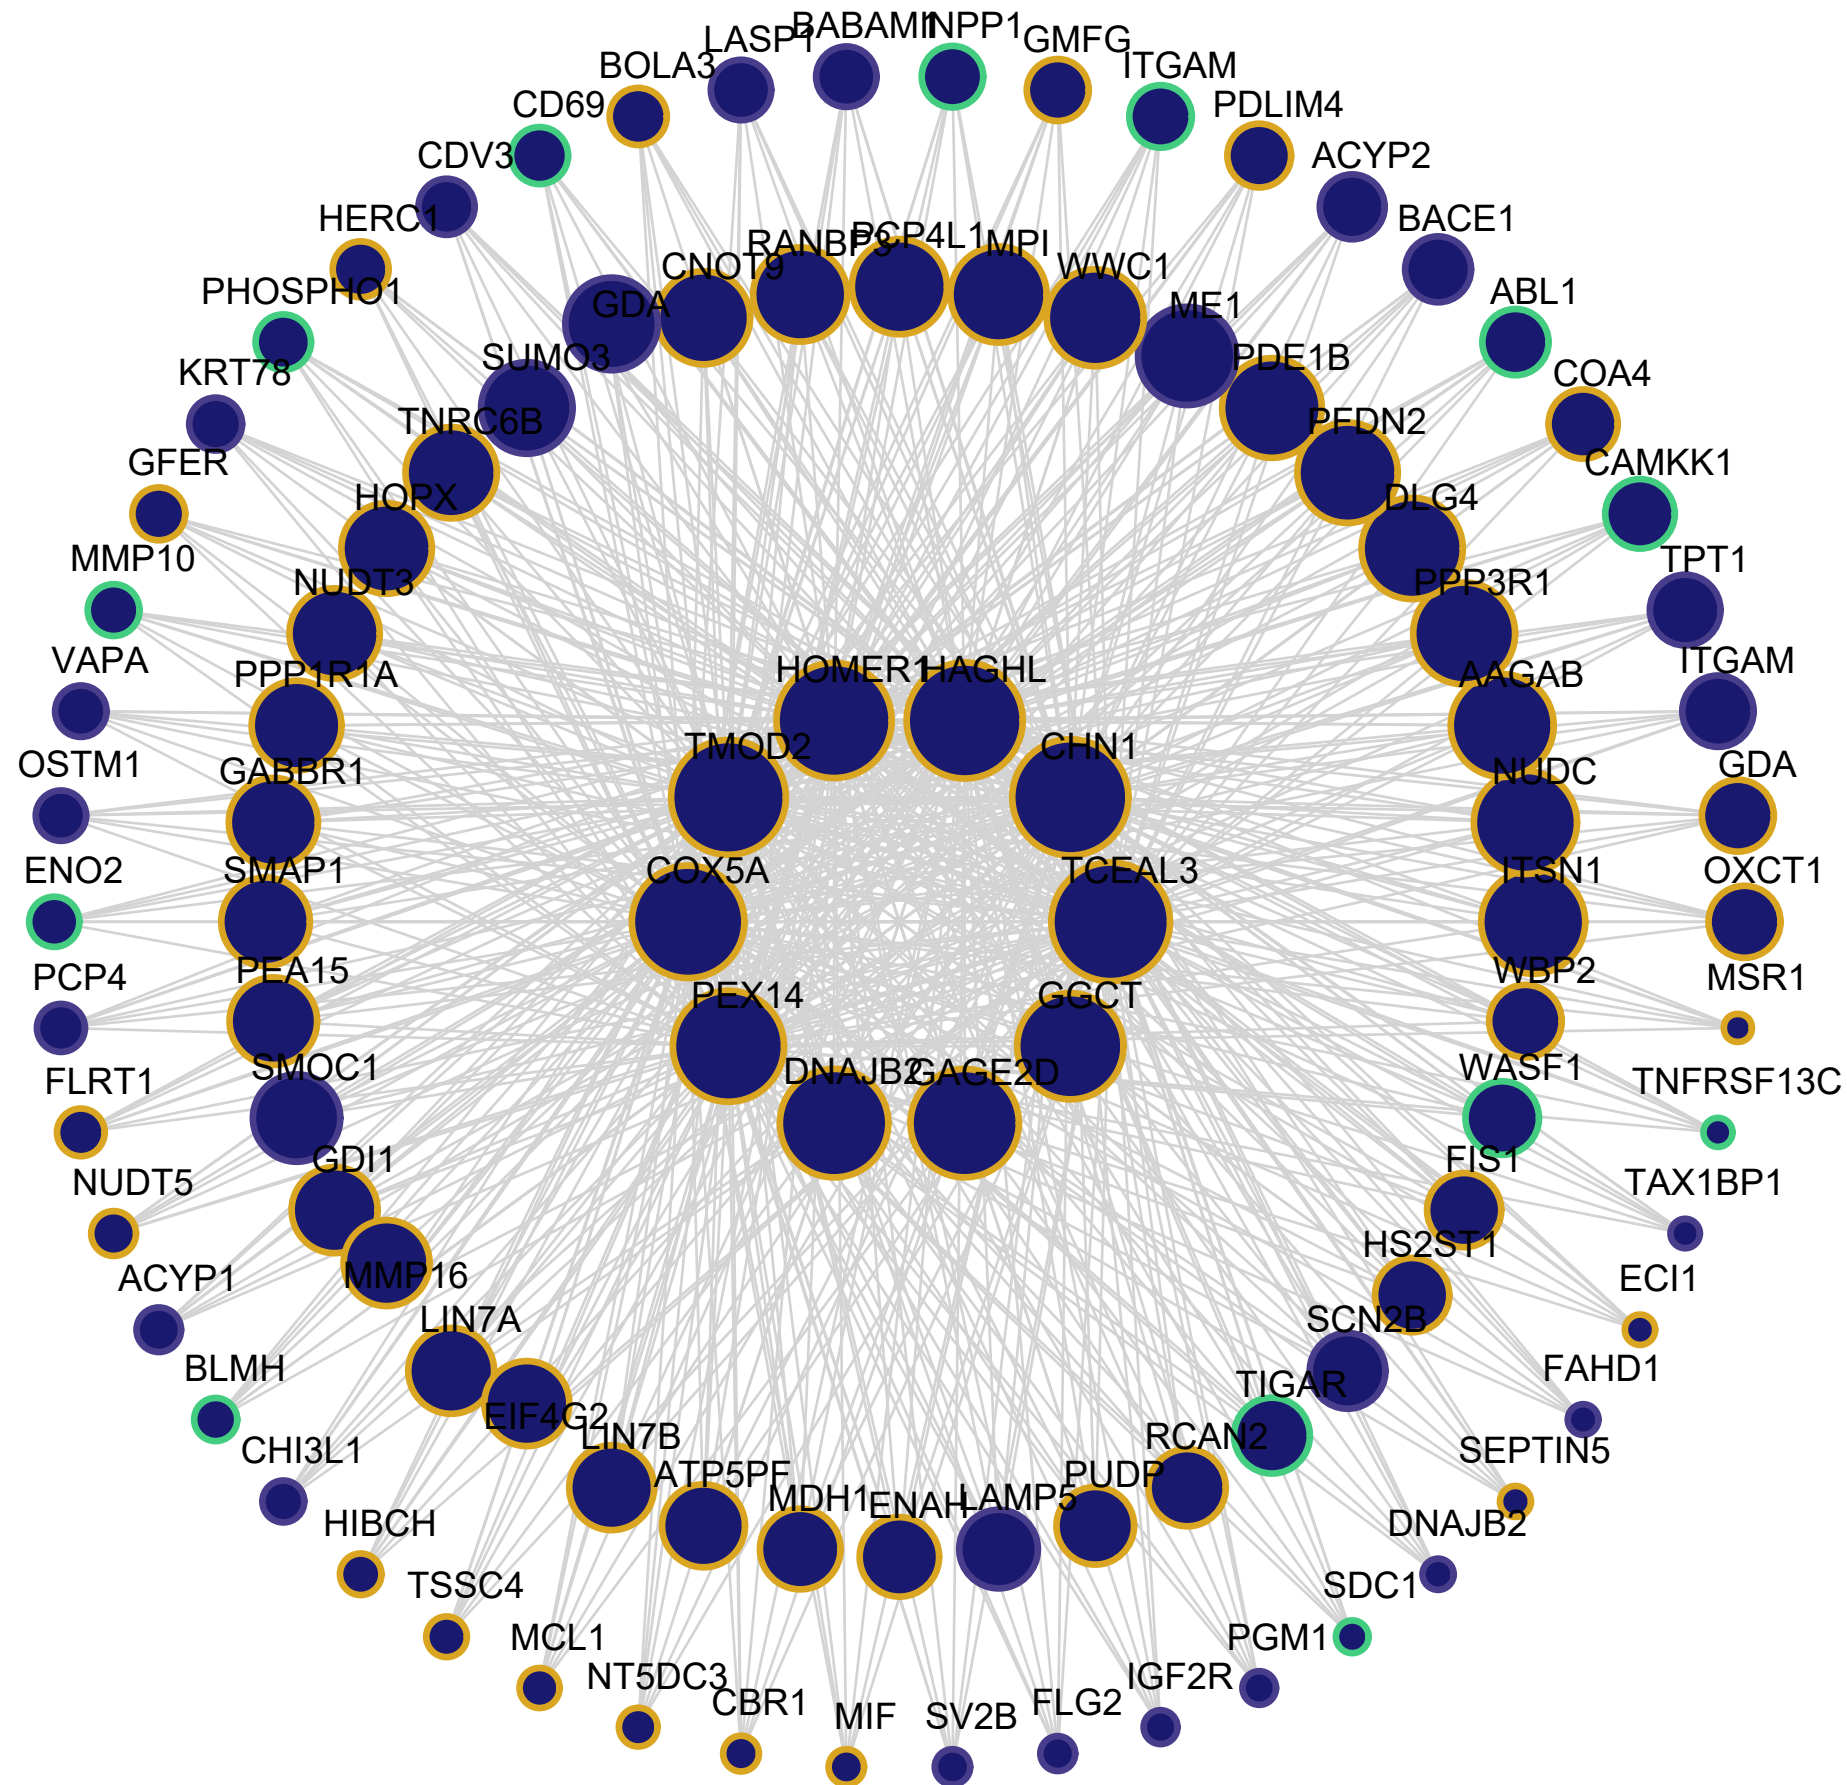





# M19 lightyellow module: Synapse Organization

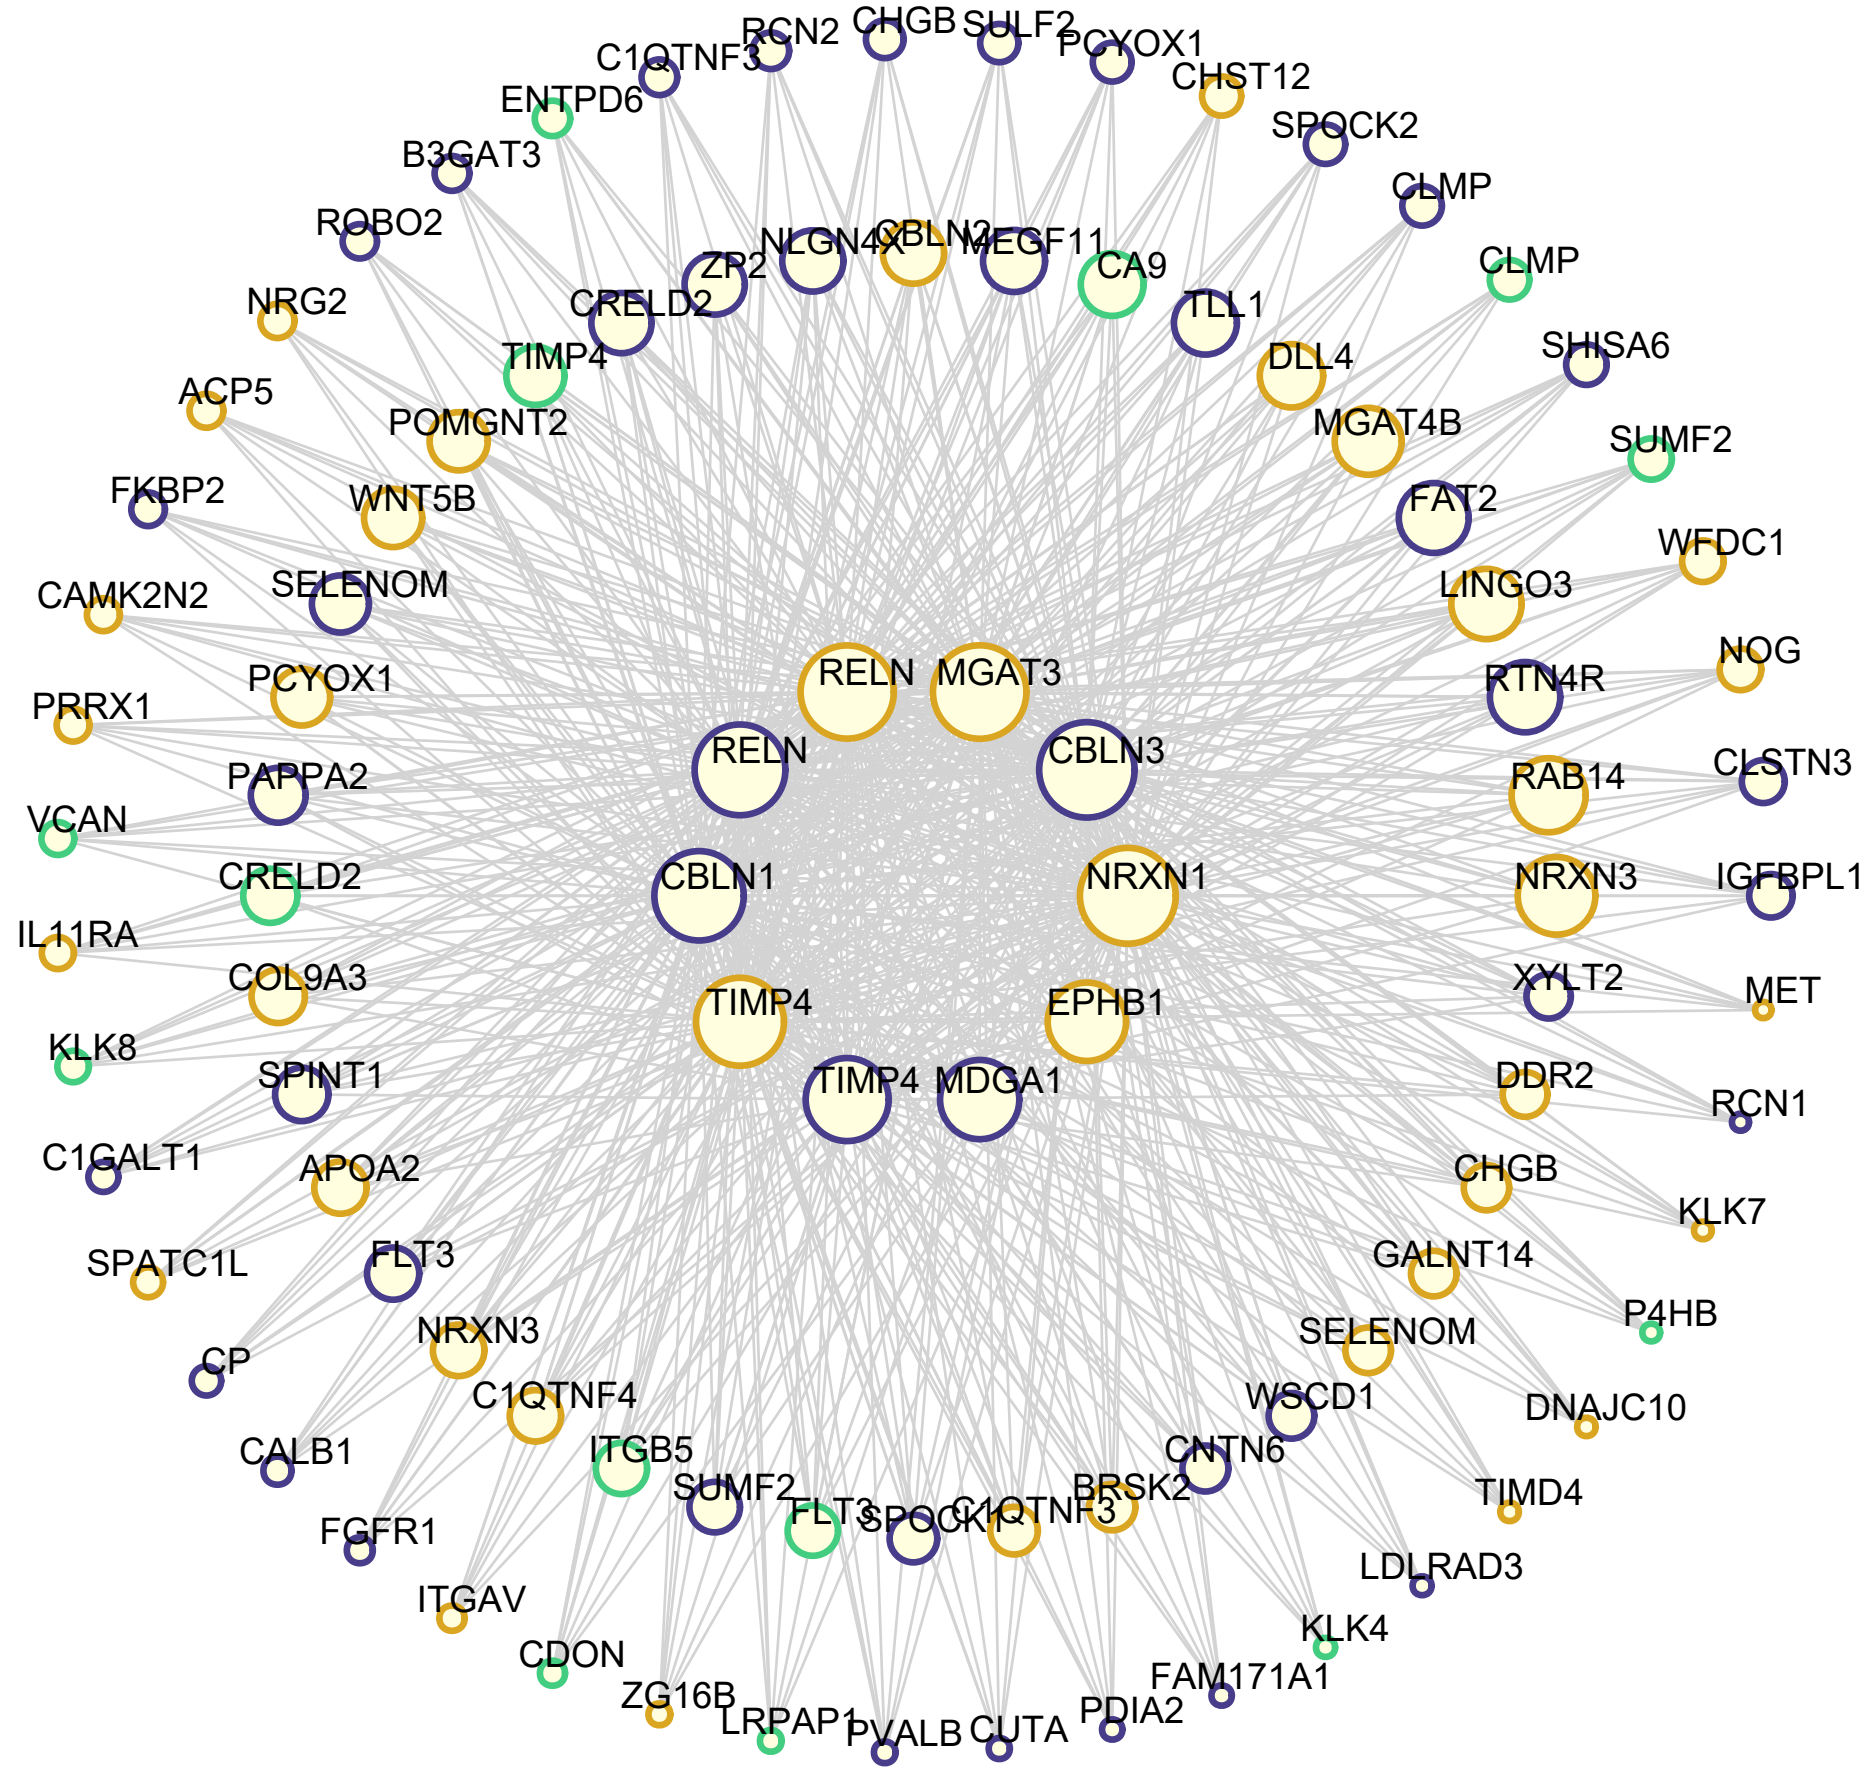

M38 plum1 module: Ambiguous

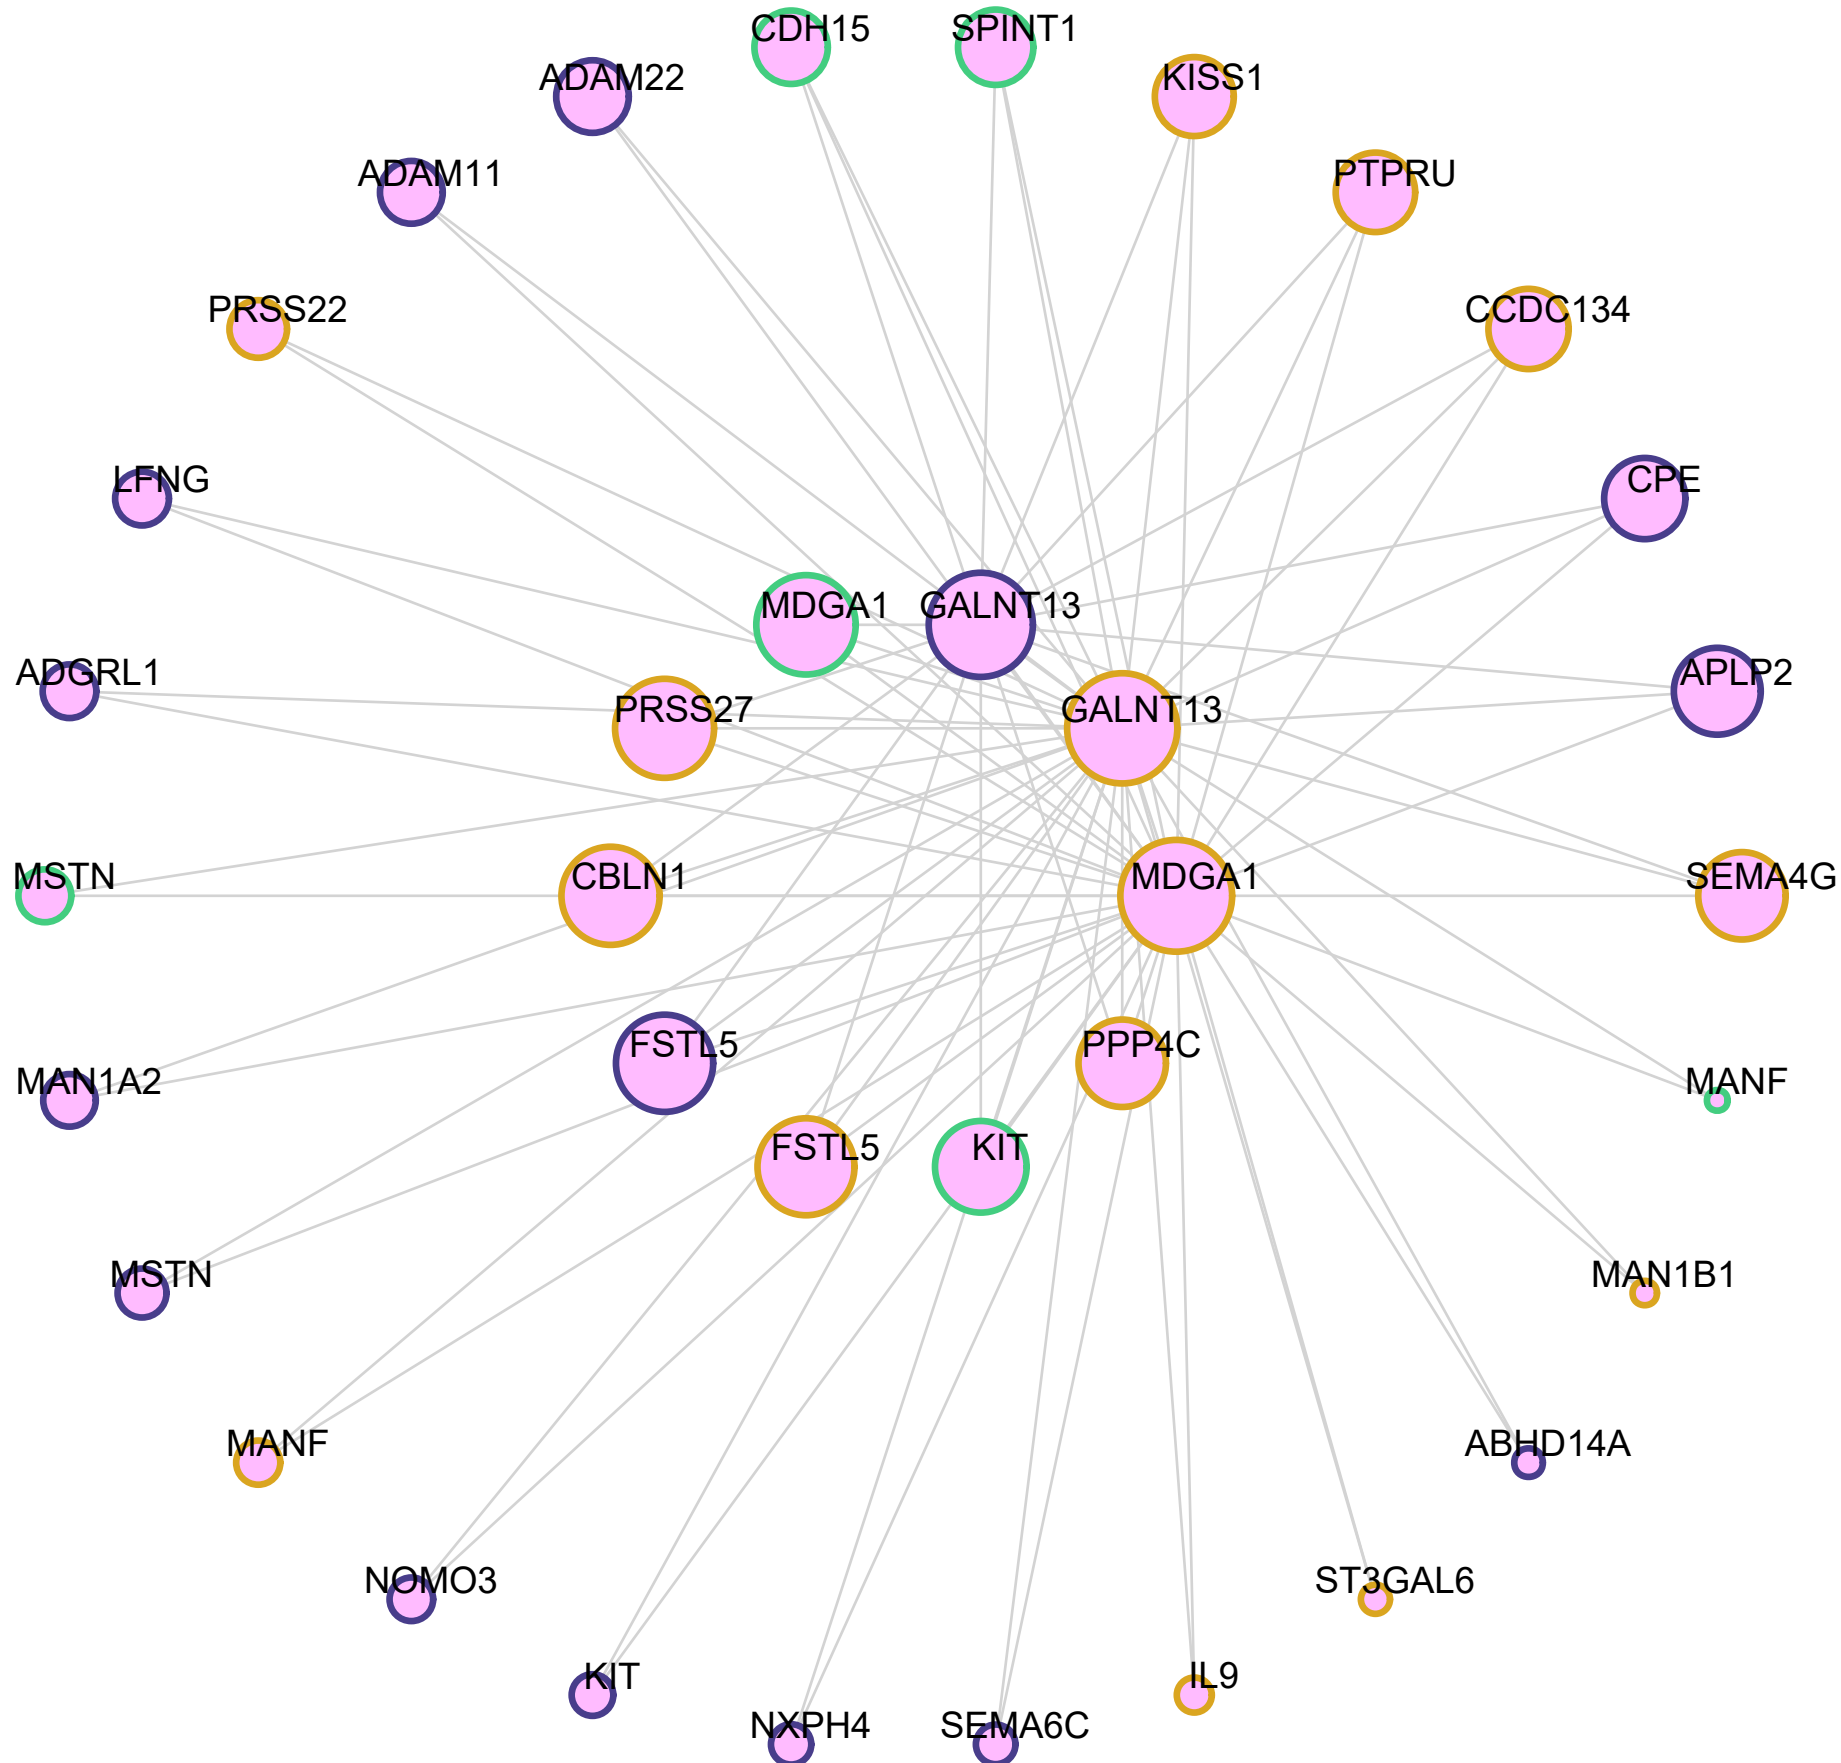

# M7 black module: SNAP Receptor/SNARE Complex

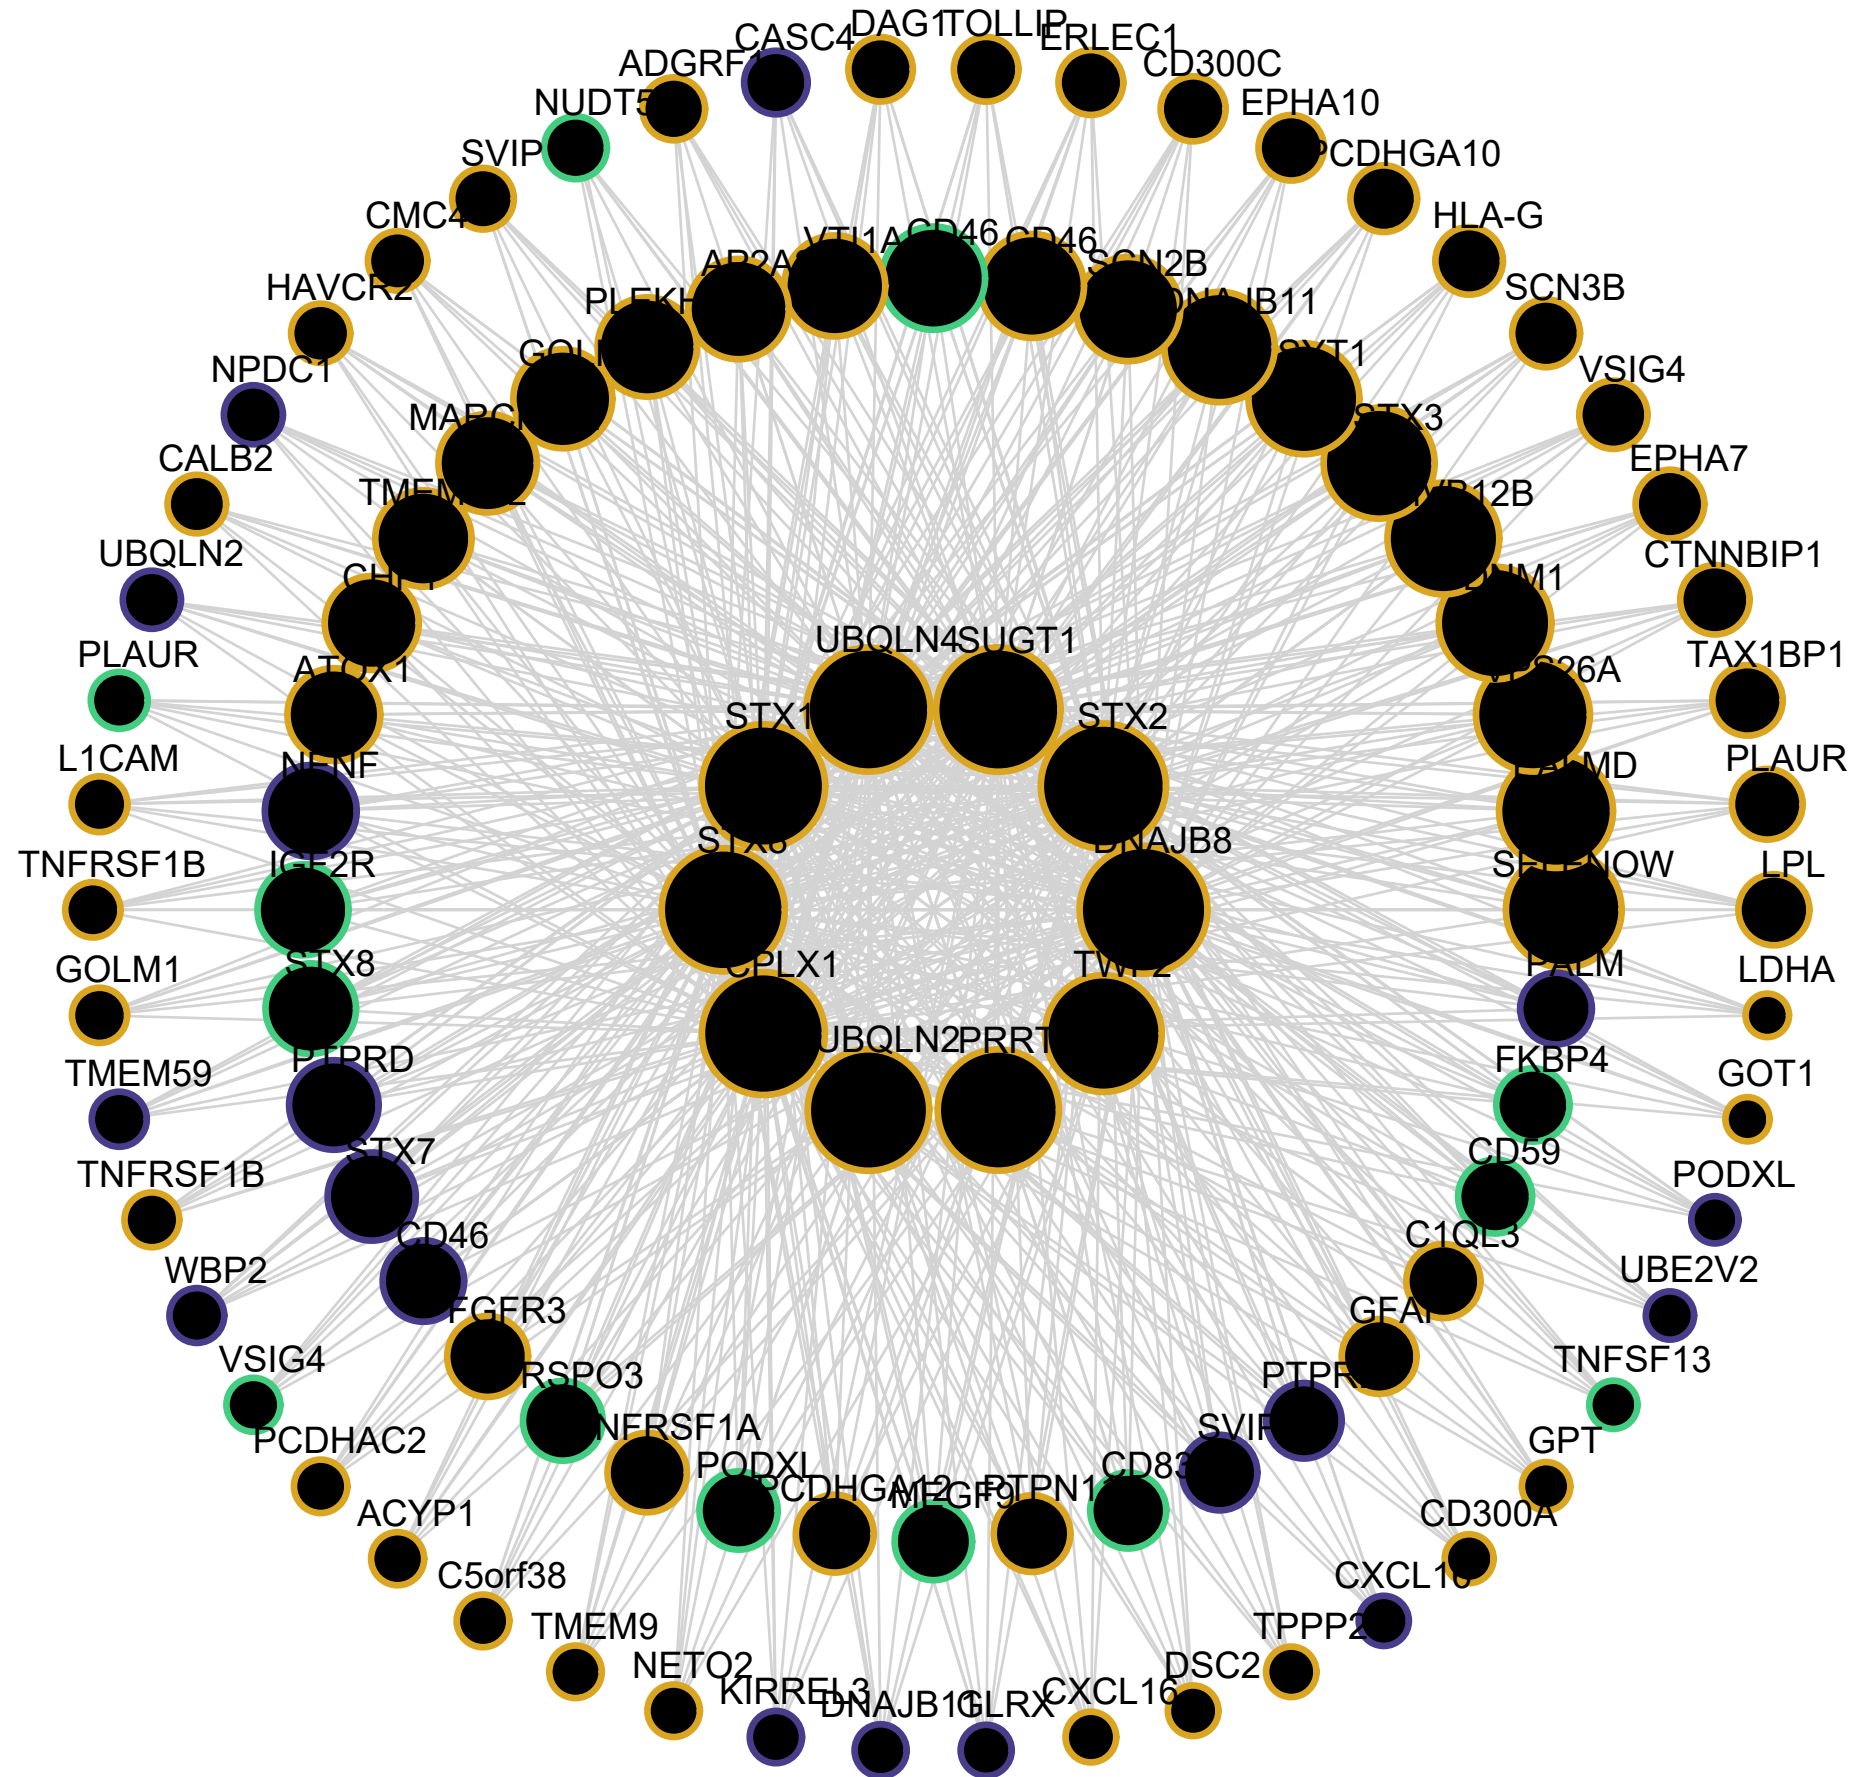





# M27 white module: Ambiguous

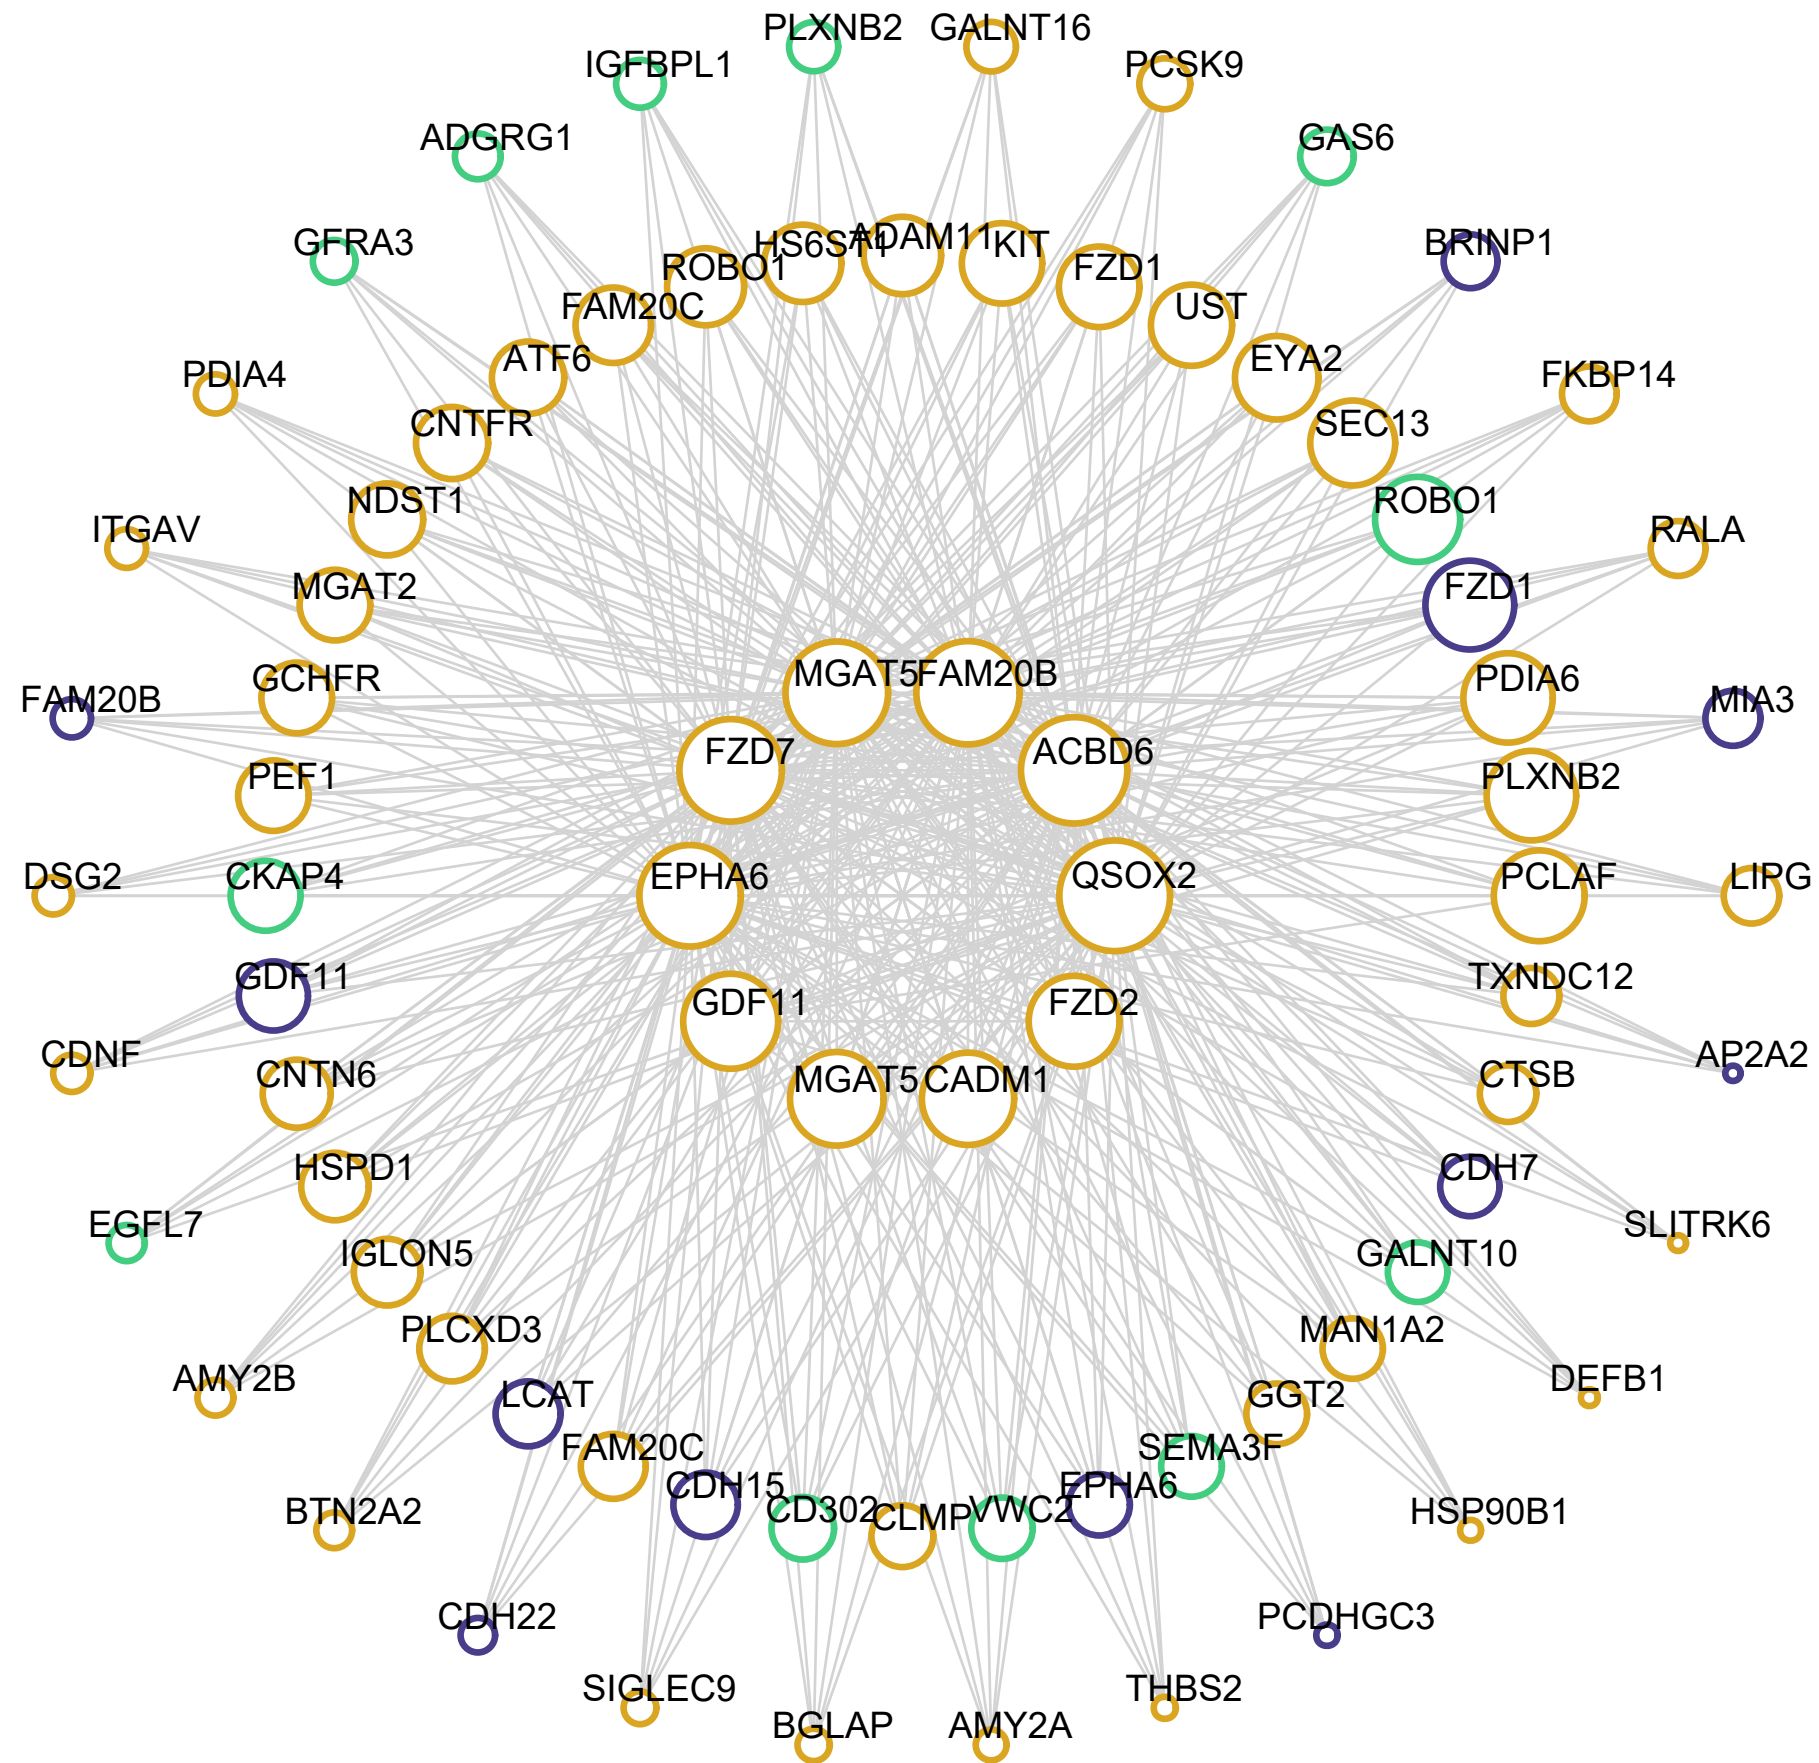

M31 paleturquoise module: Glial Cell Differentiation

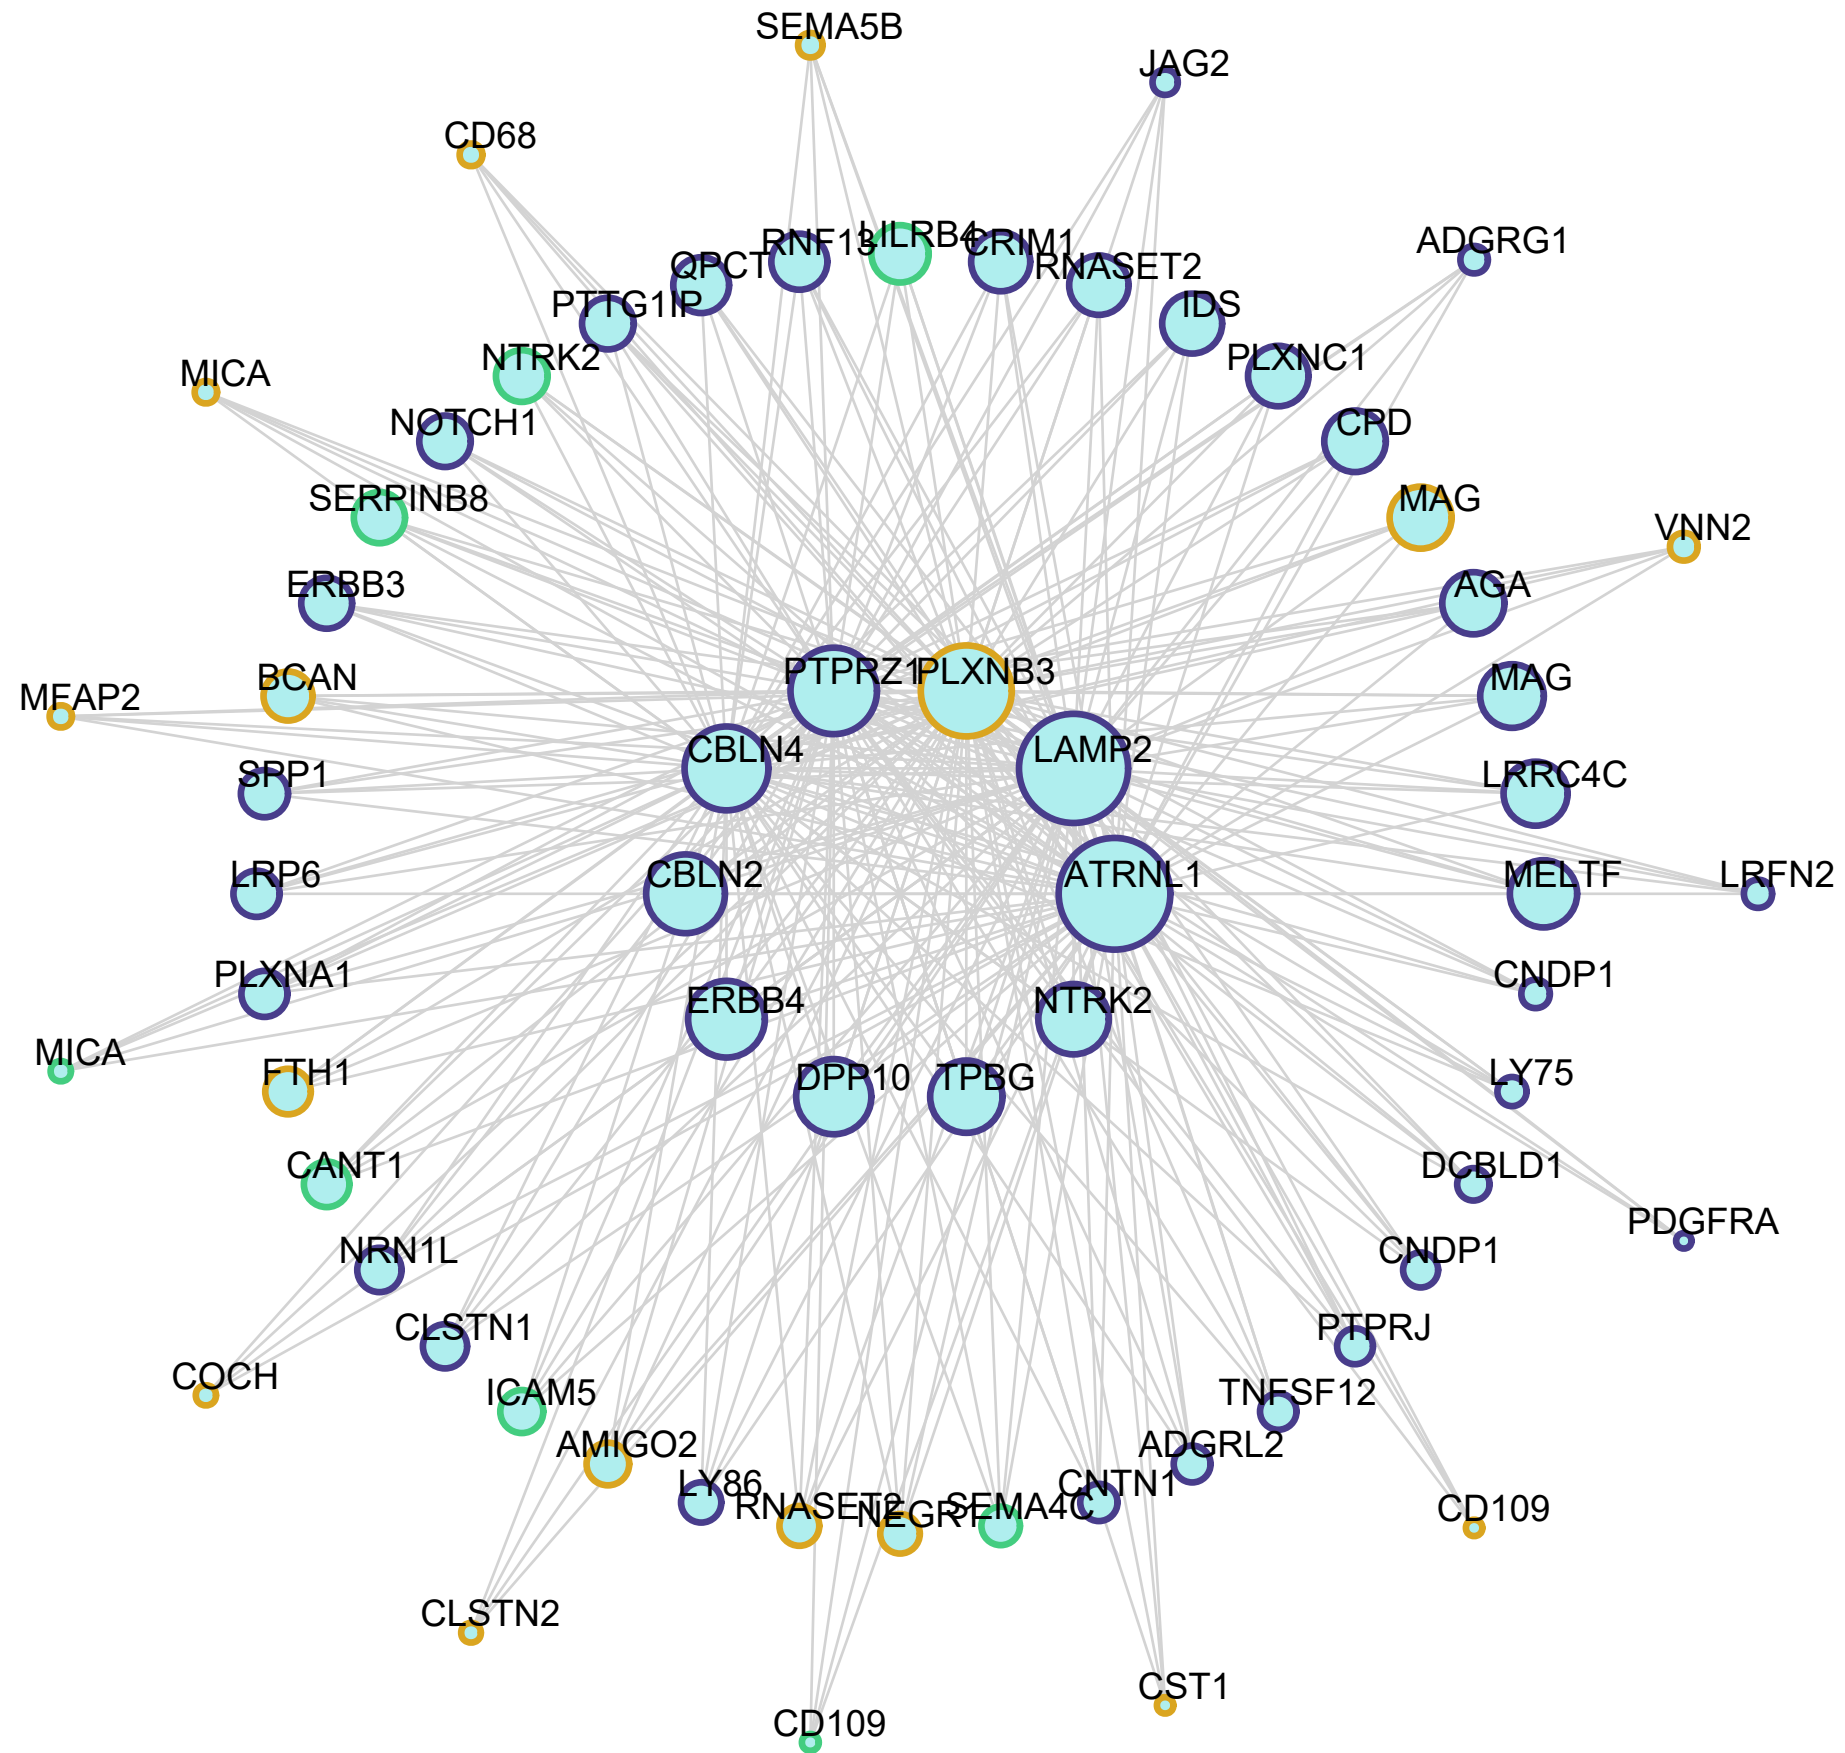

### M32 violet module: Synaptic Membrane/Matrisome

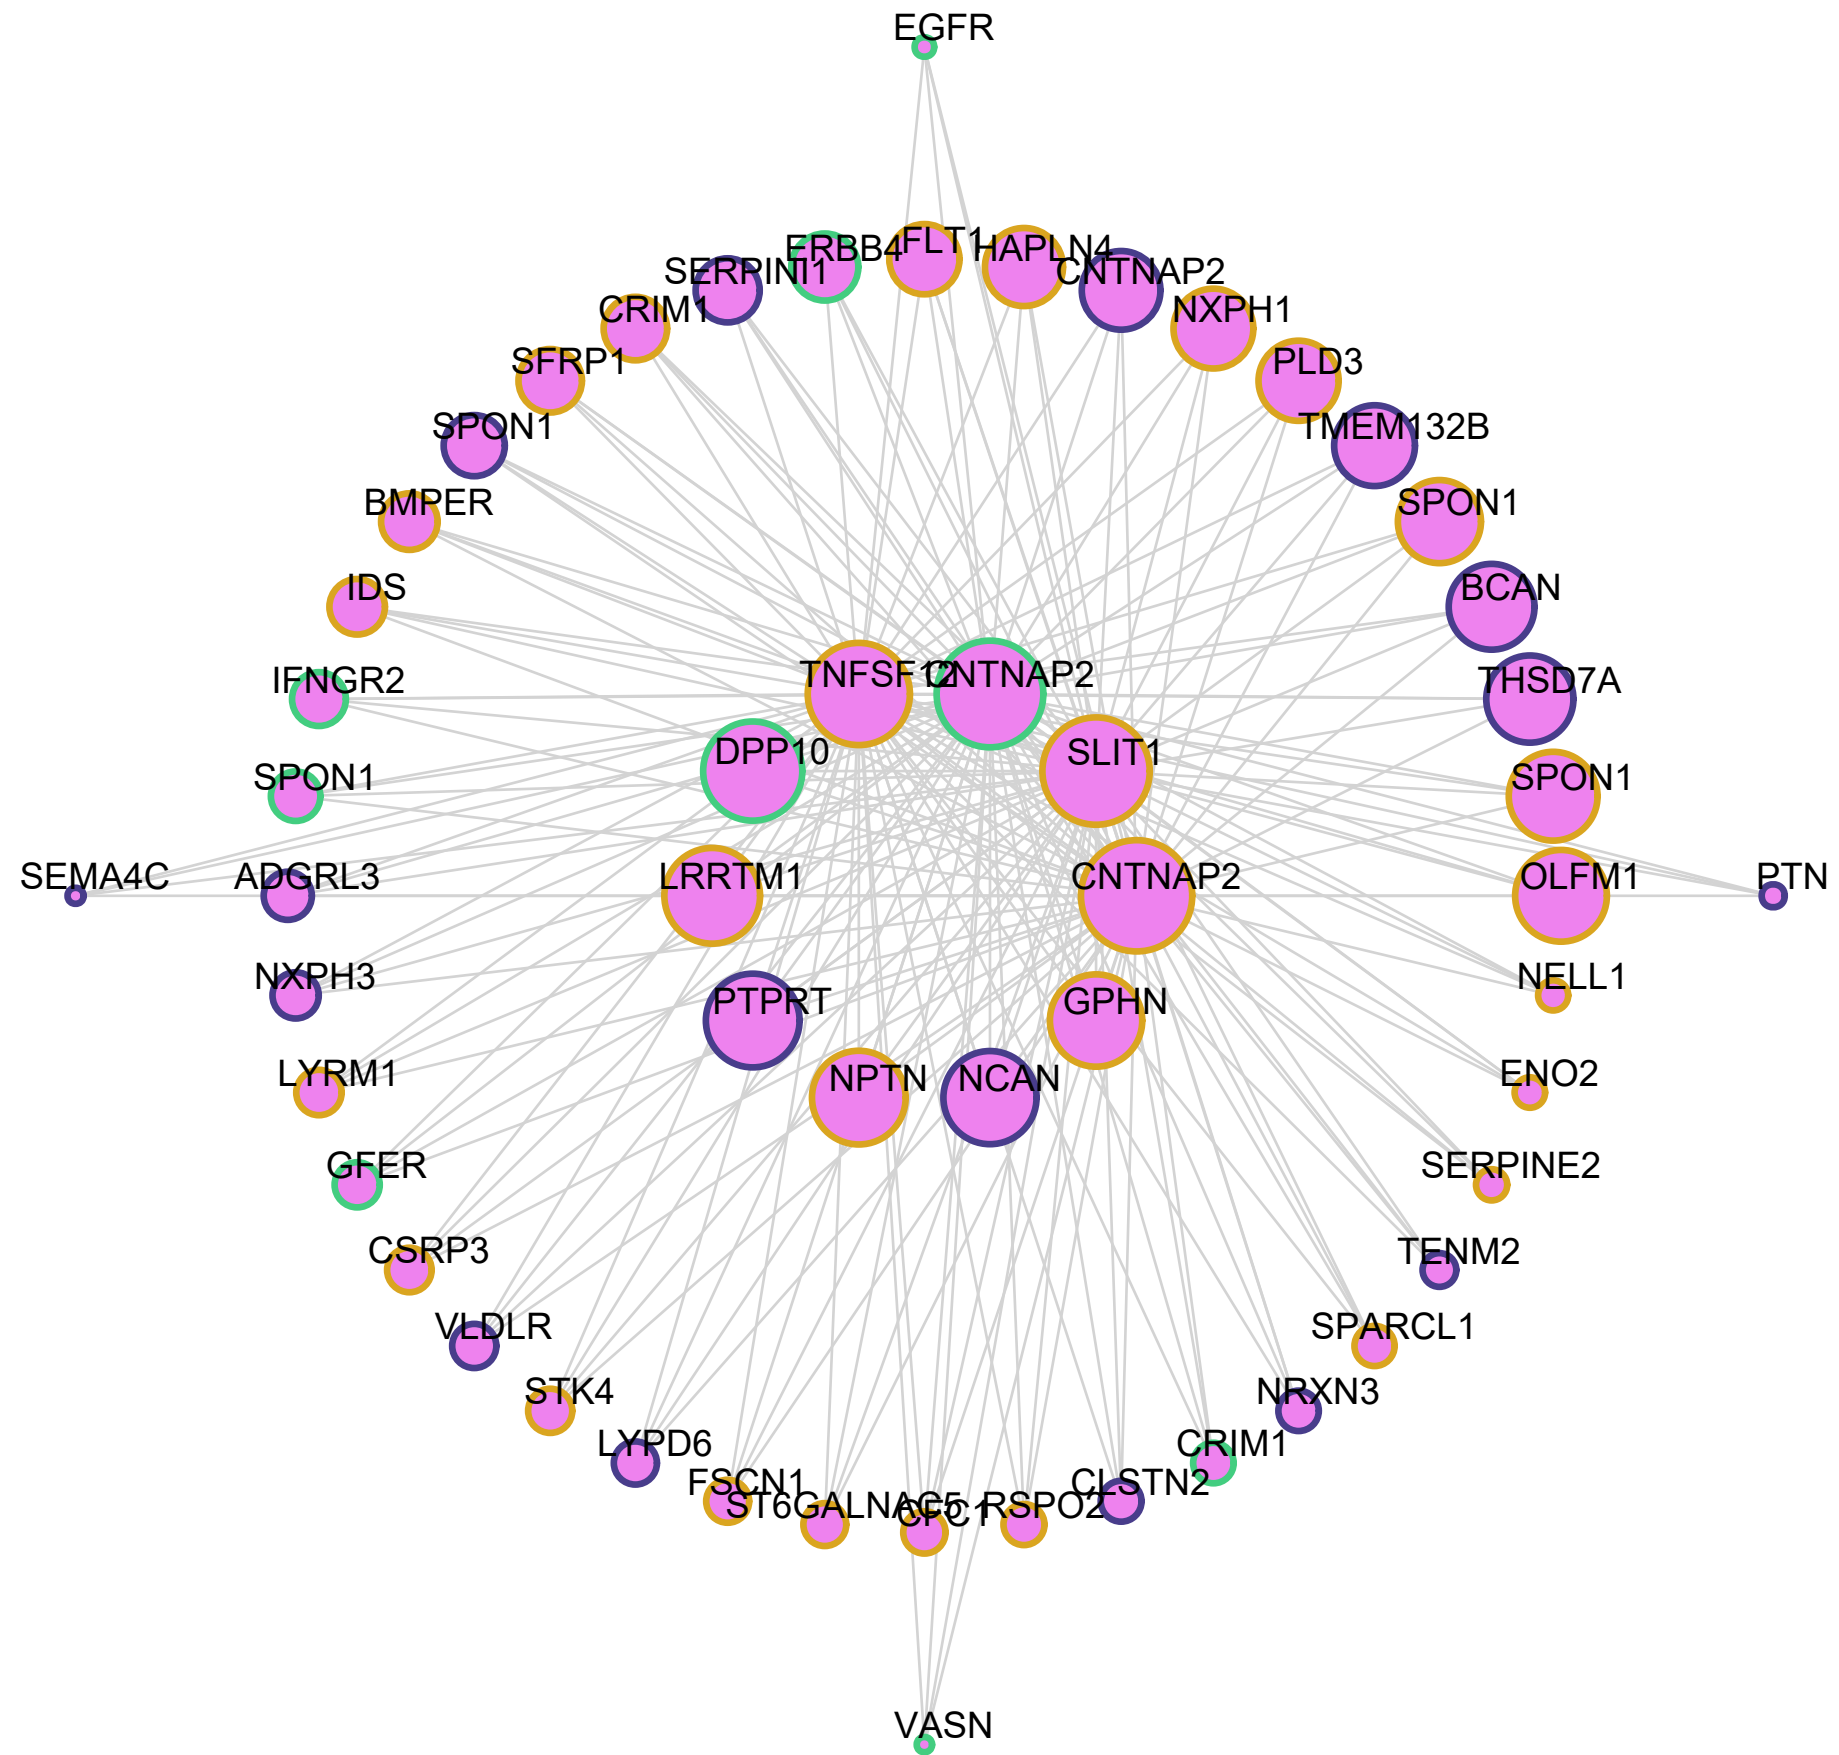



### M13 salmon module: Semaphorin-Plexin/Axon Guidance

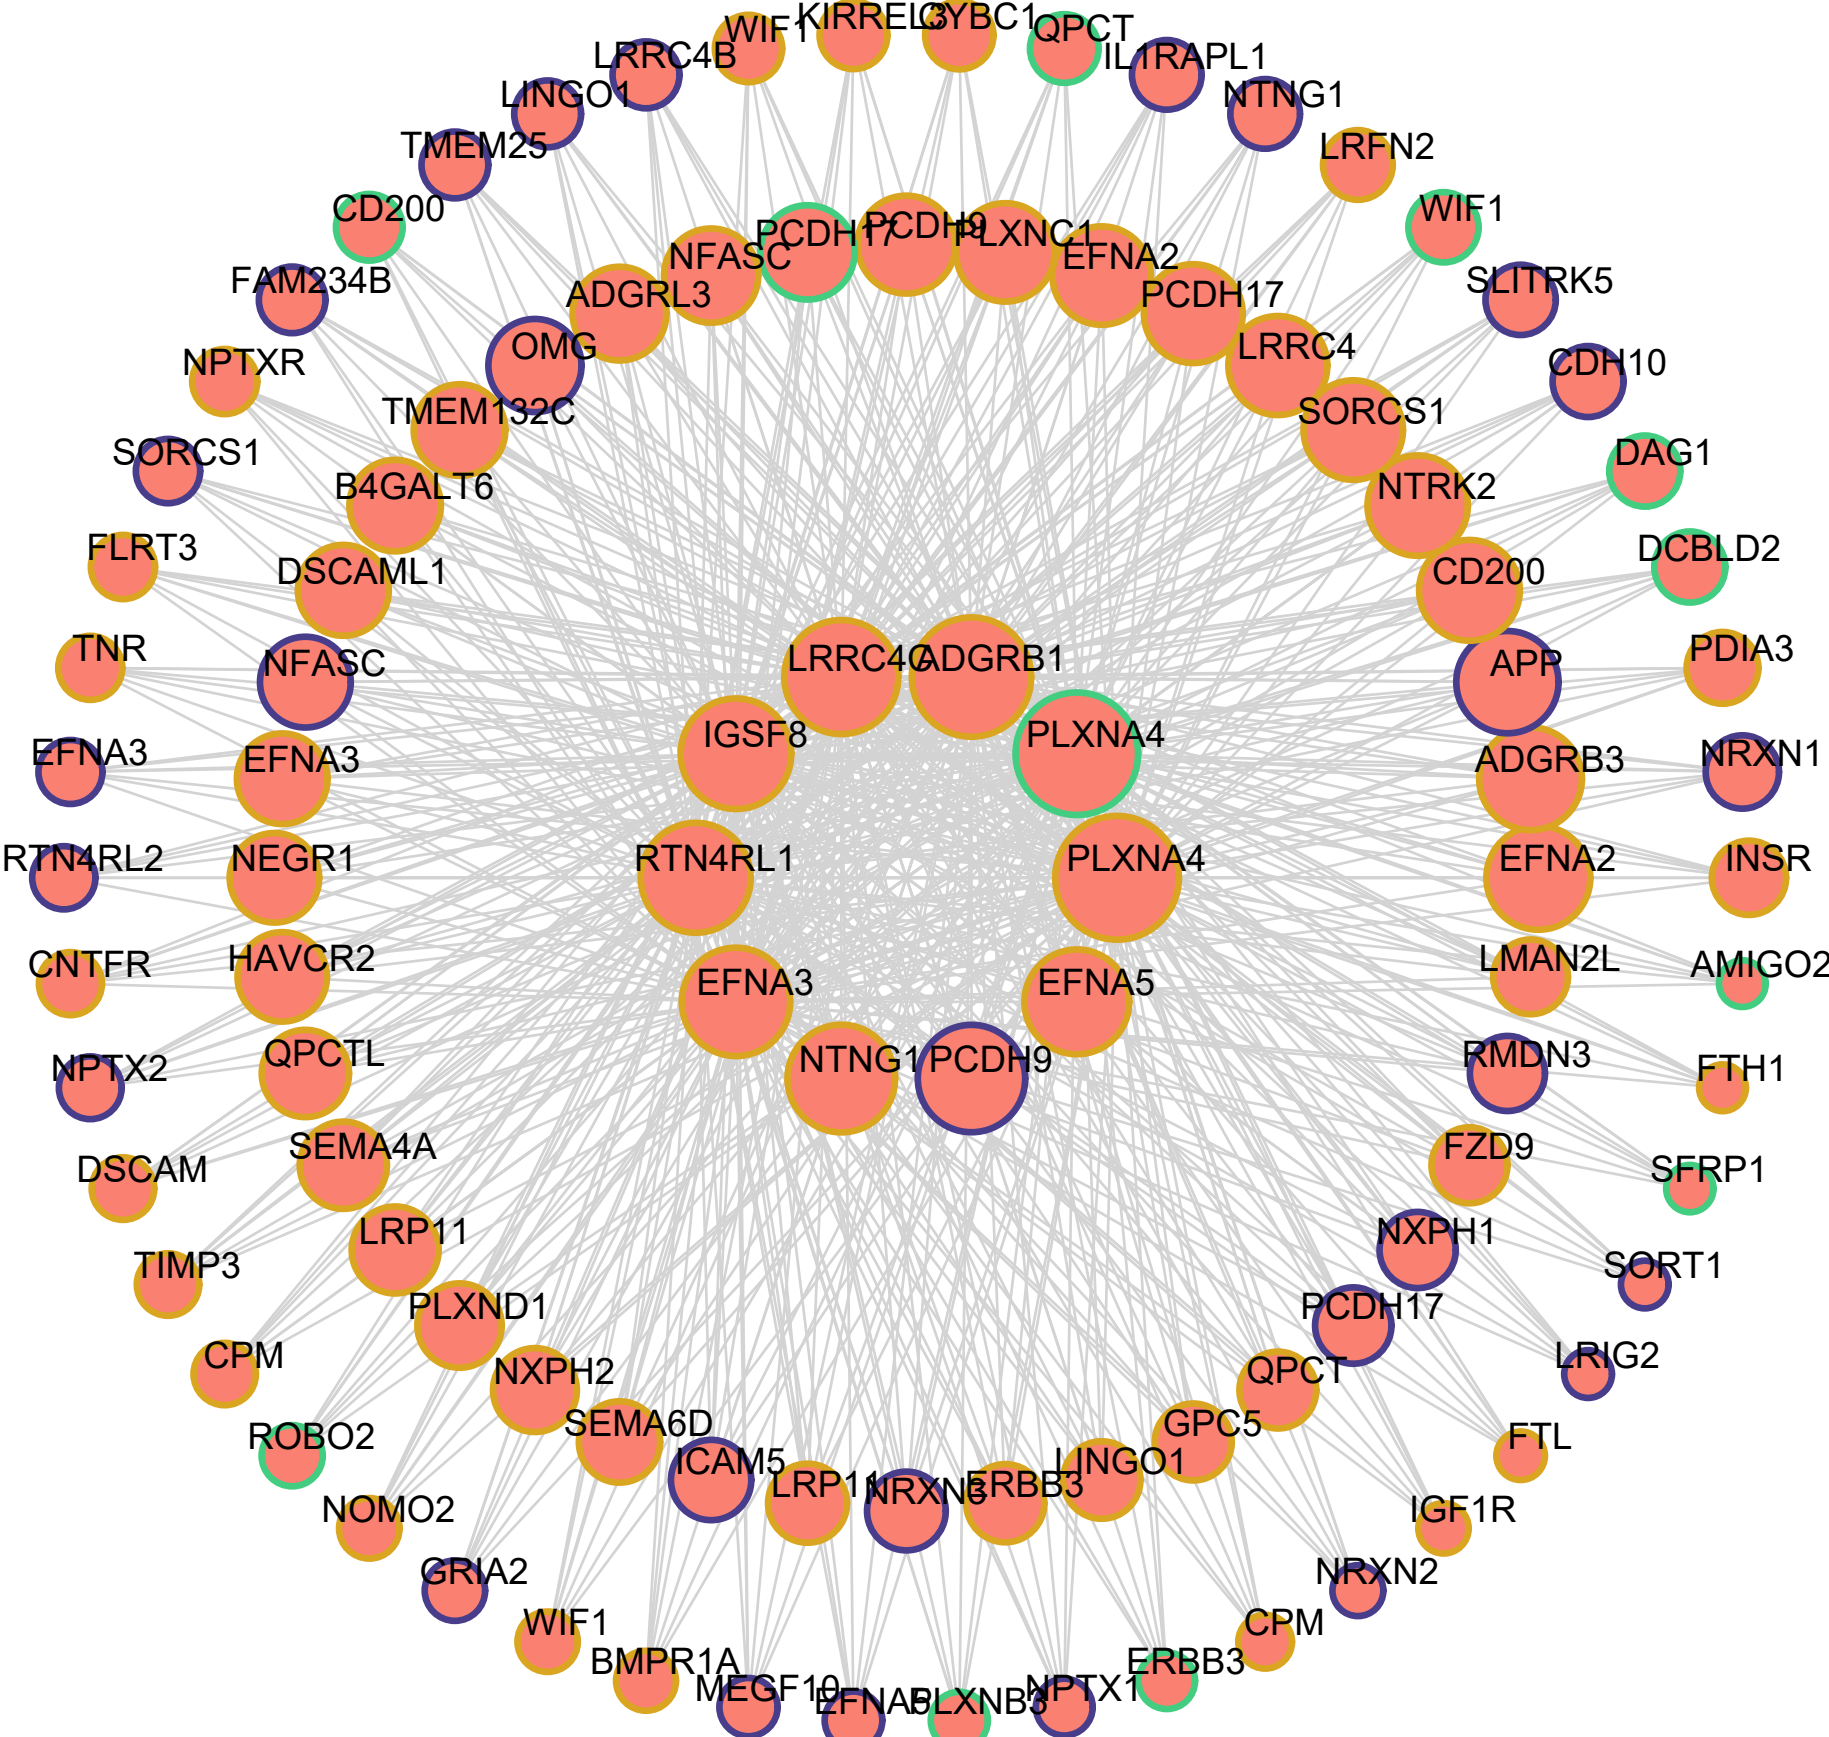





### M30 steelblue module: Ribonucleoprotein Complex

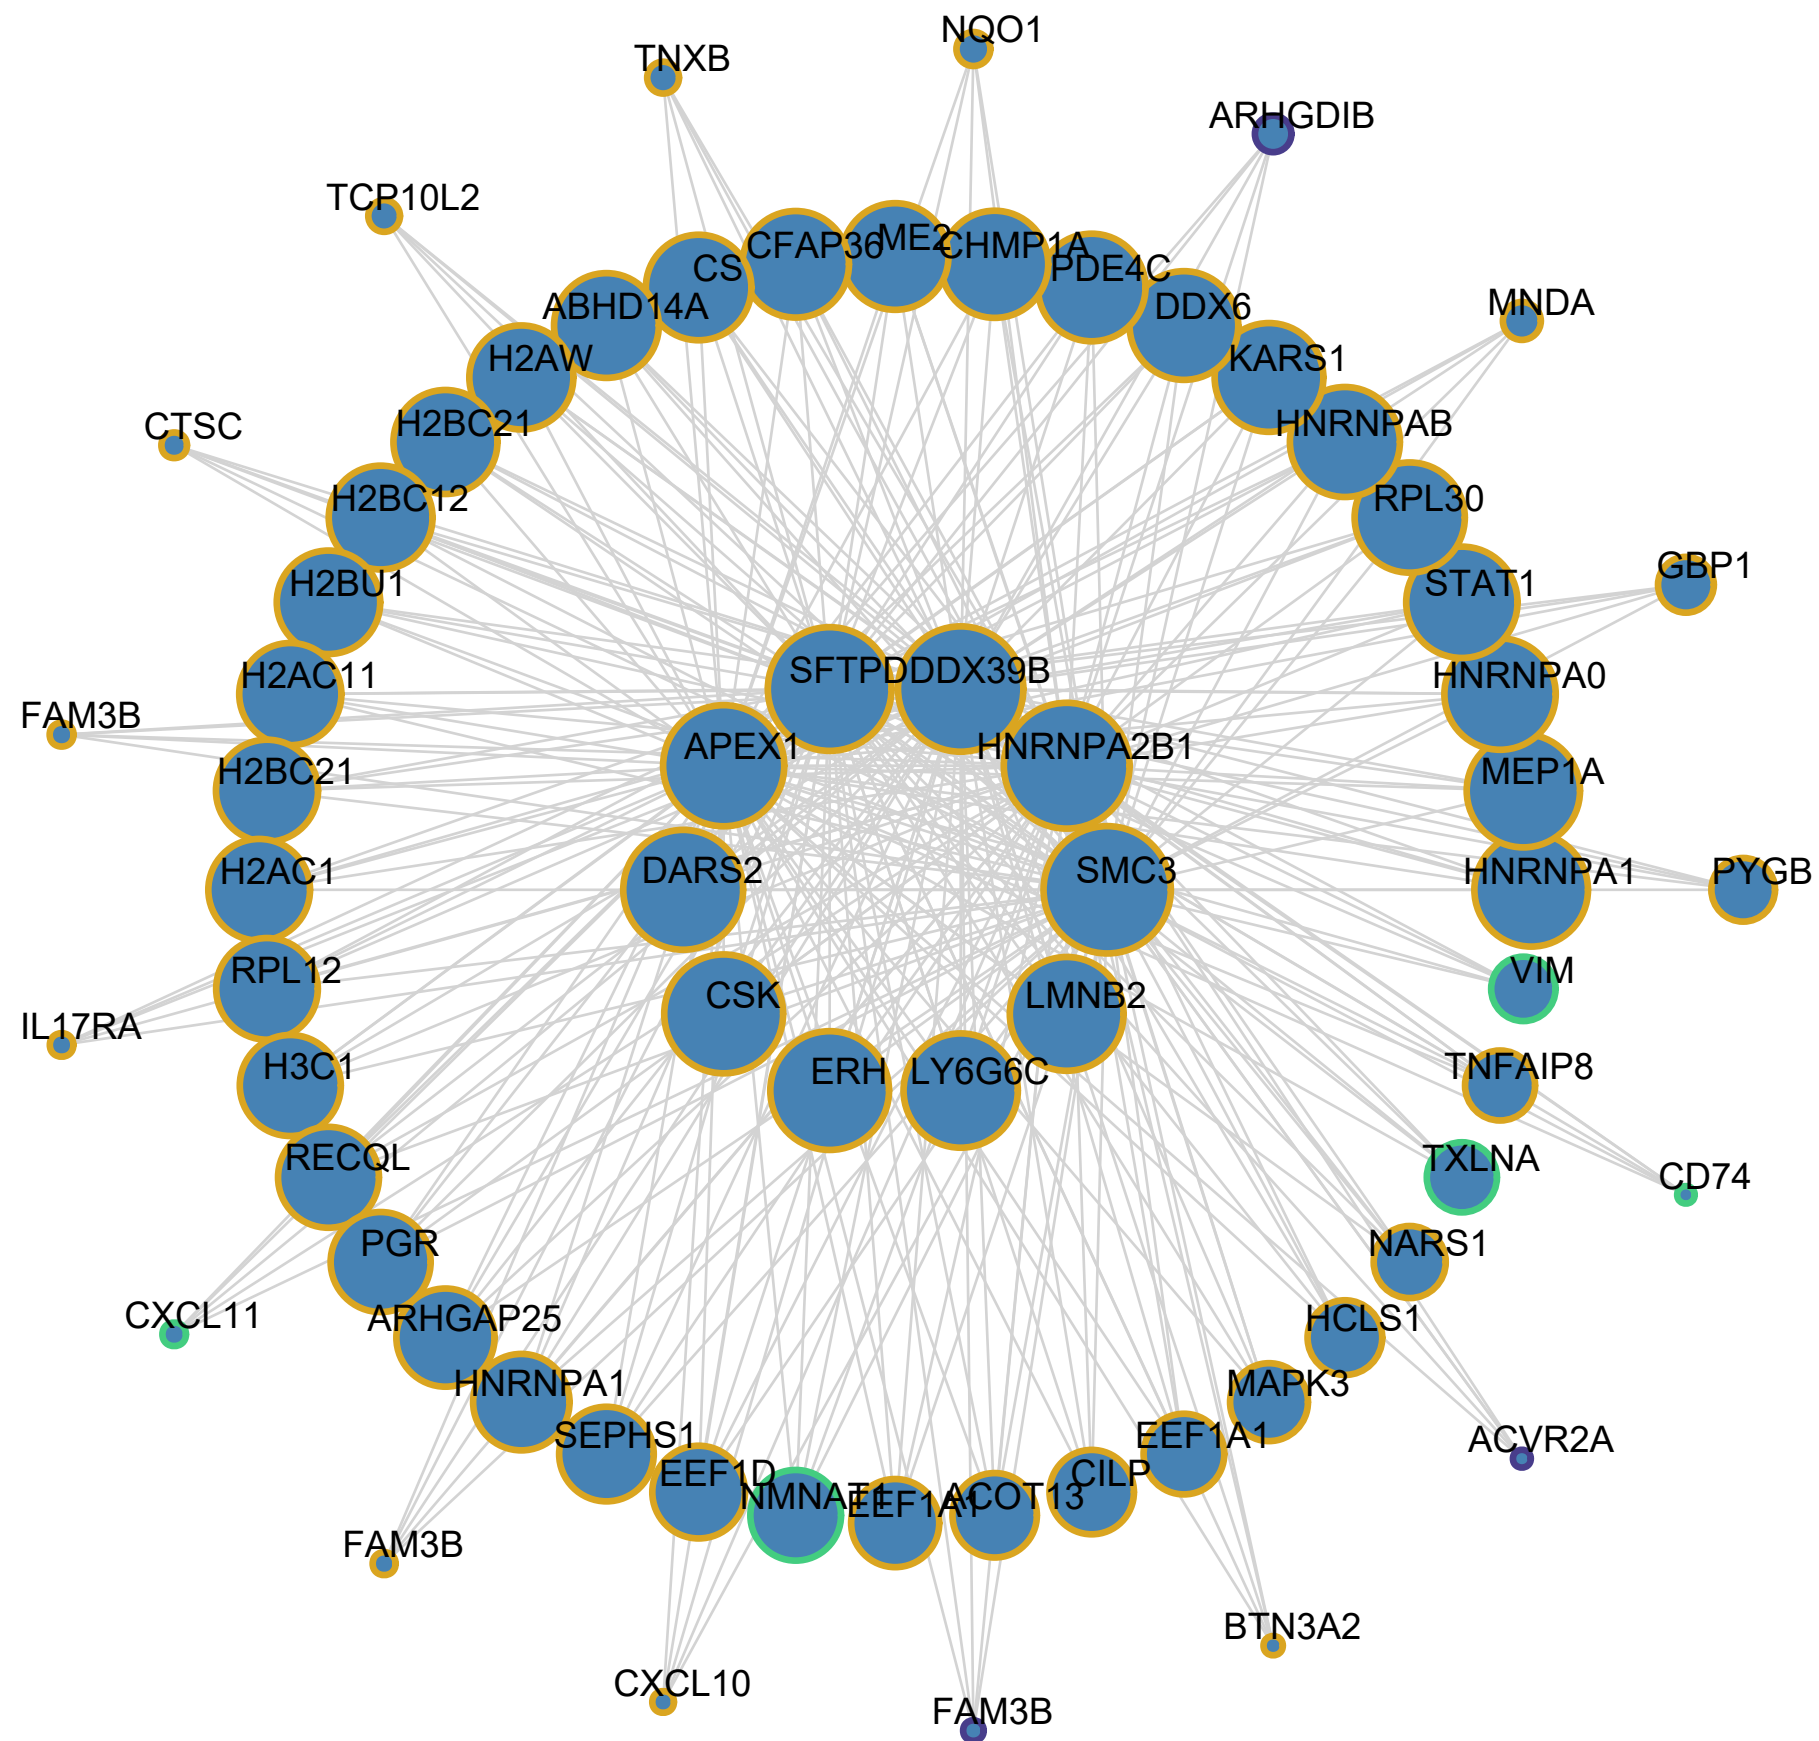

# M25 orange module: Ambiguous

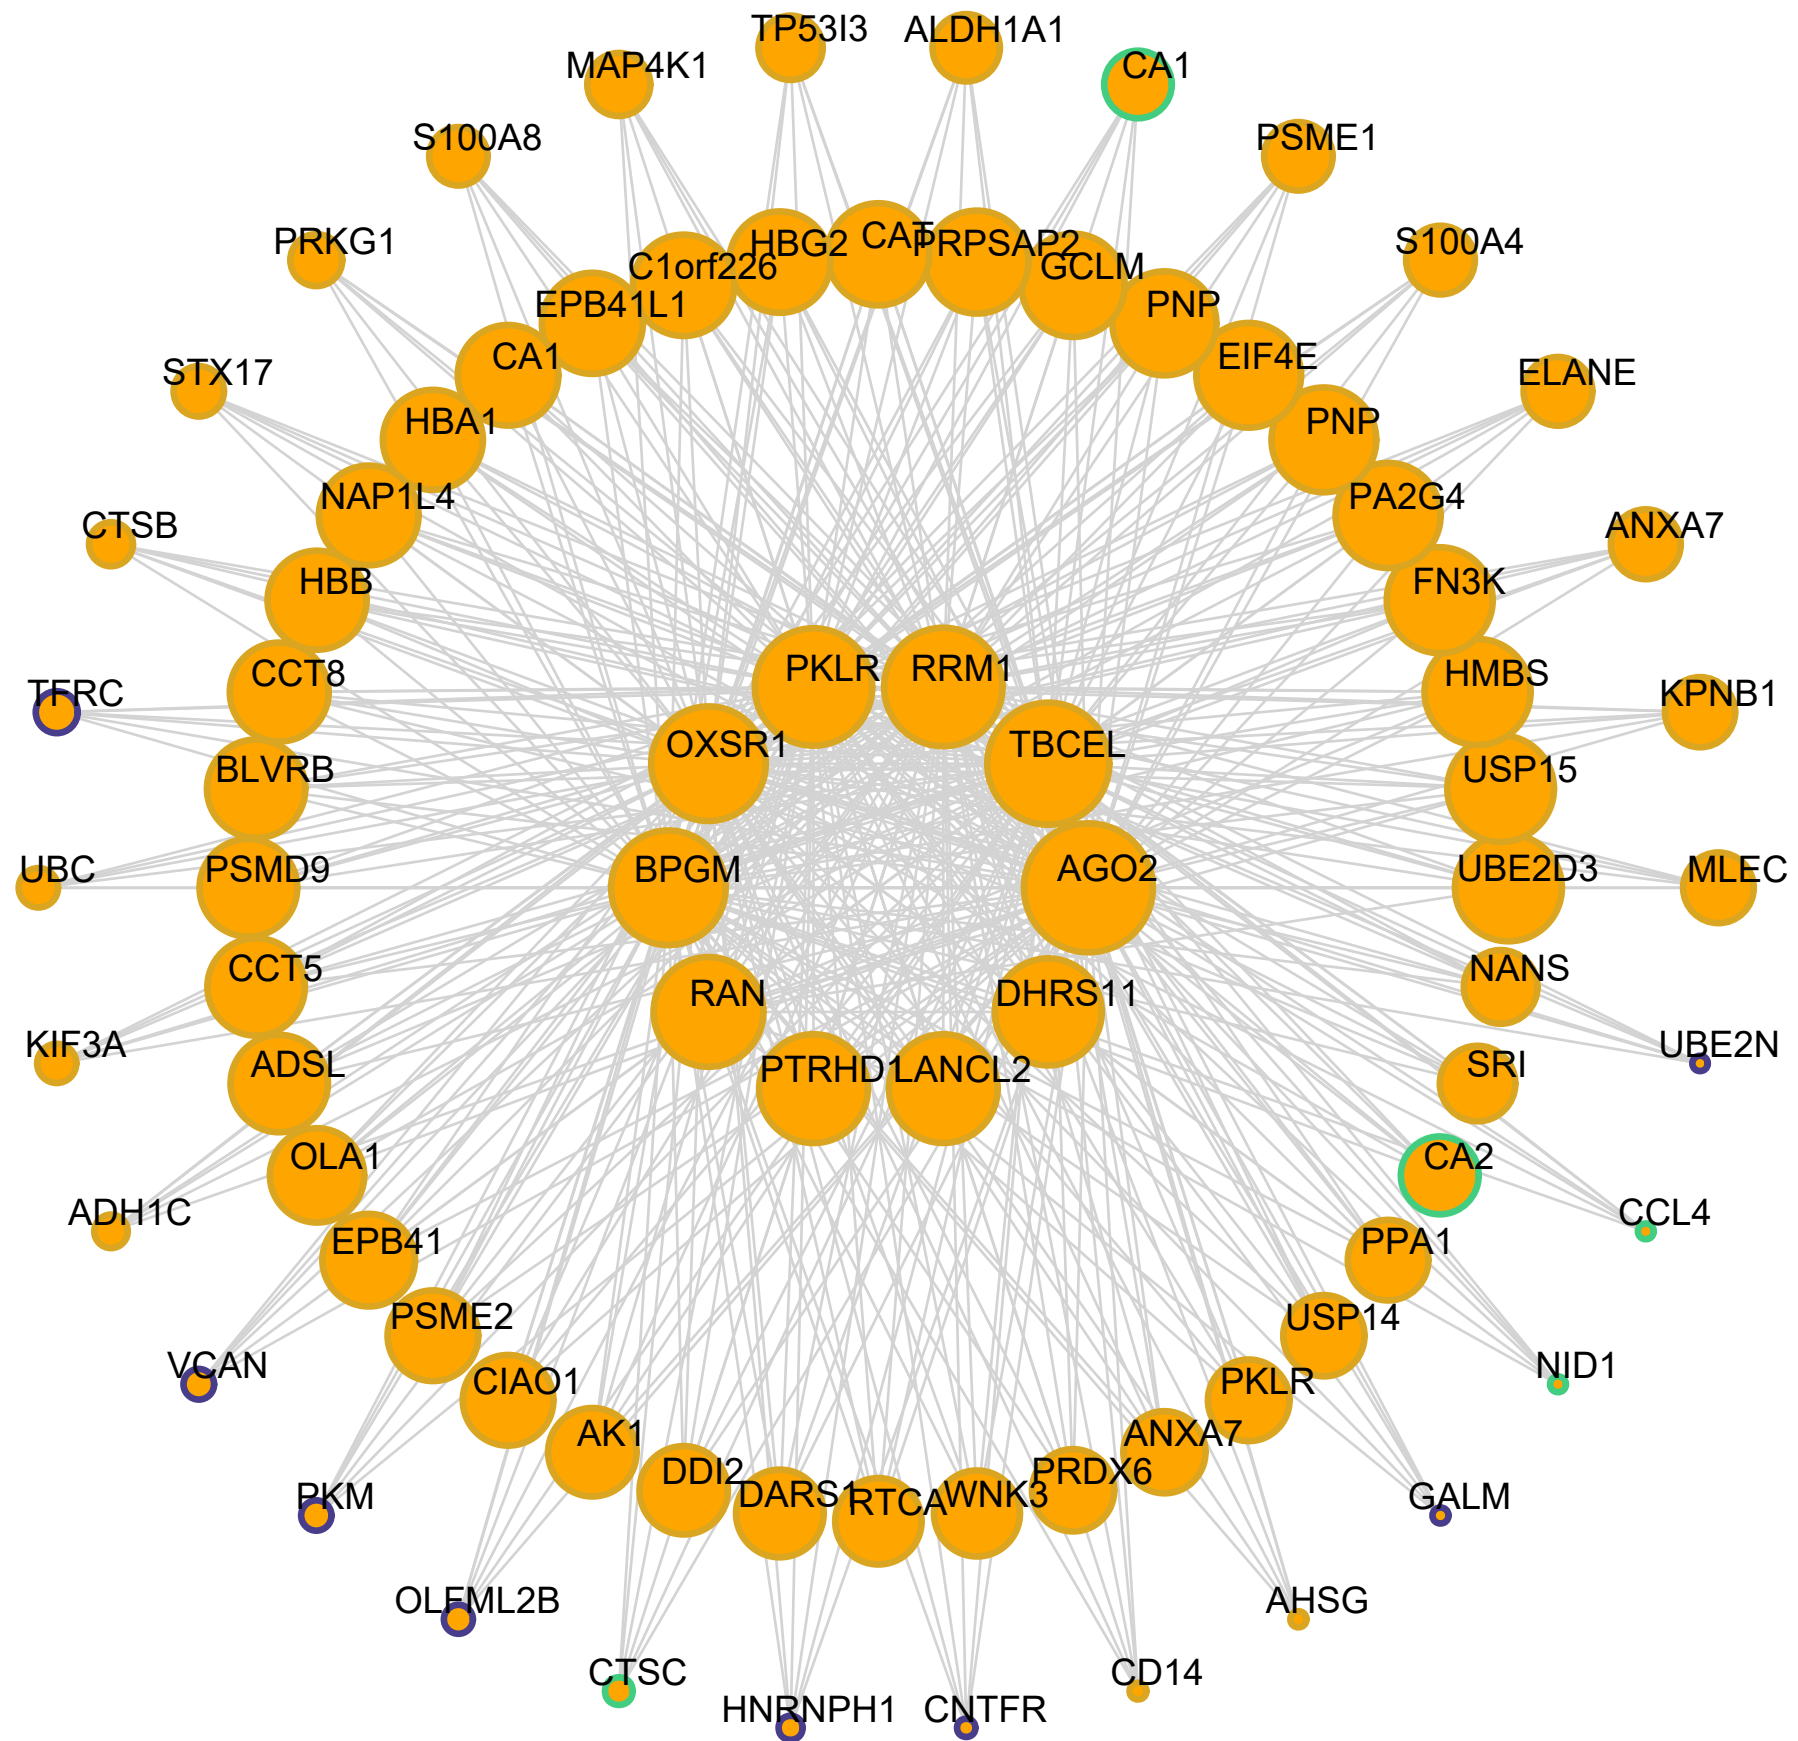



# M37 skyblue3 module: RNA Binding/Metabolism

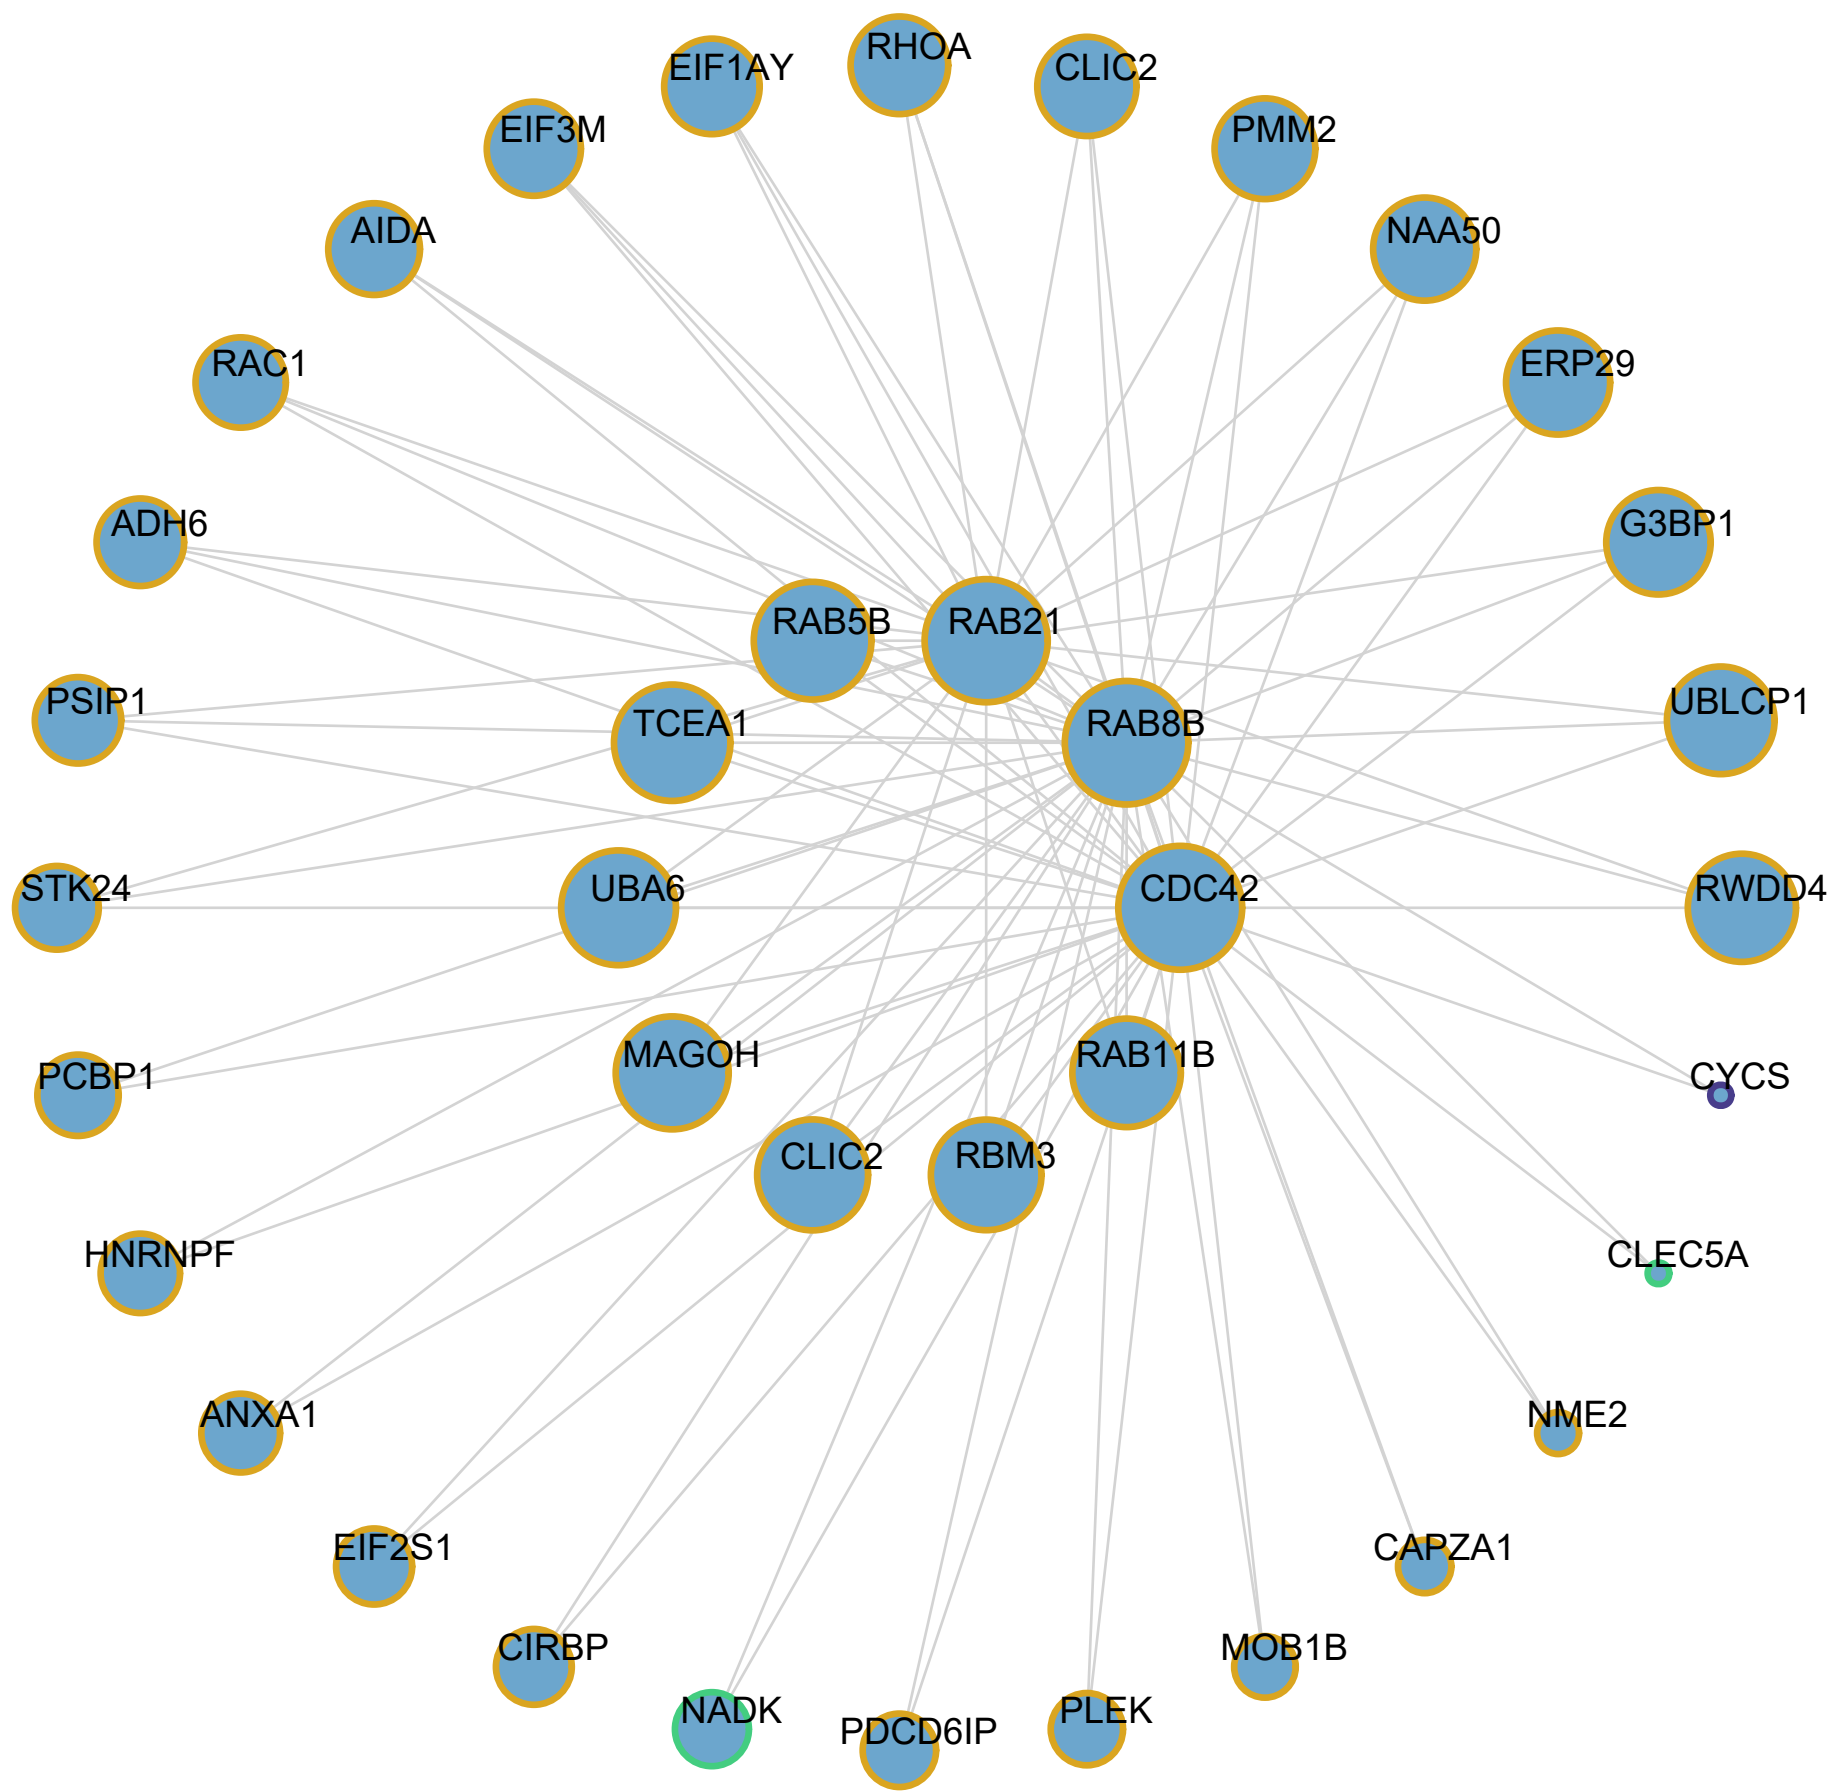





M28 skyblue module: Proteasome

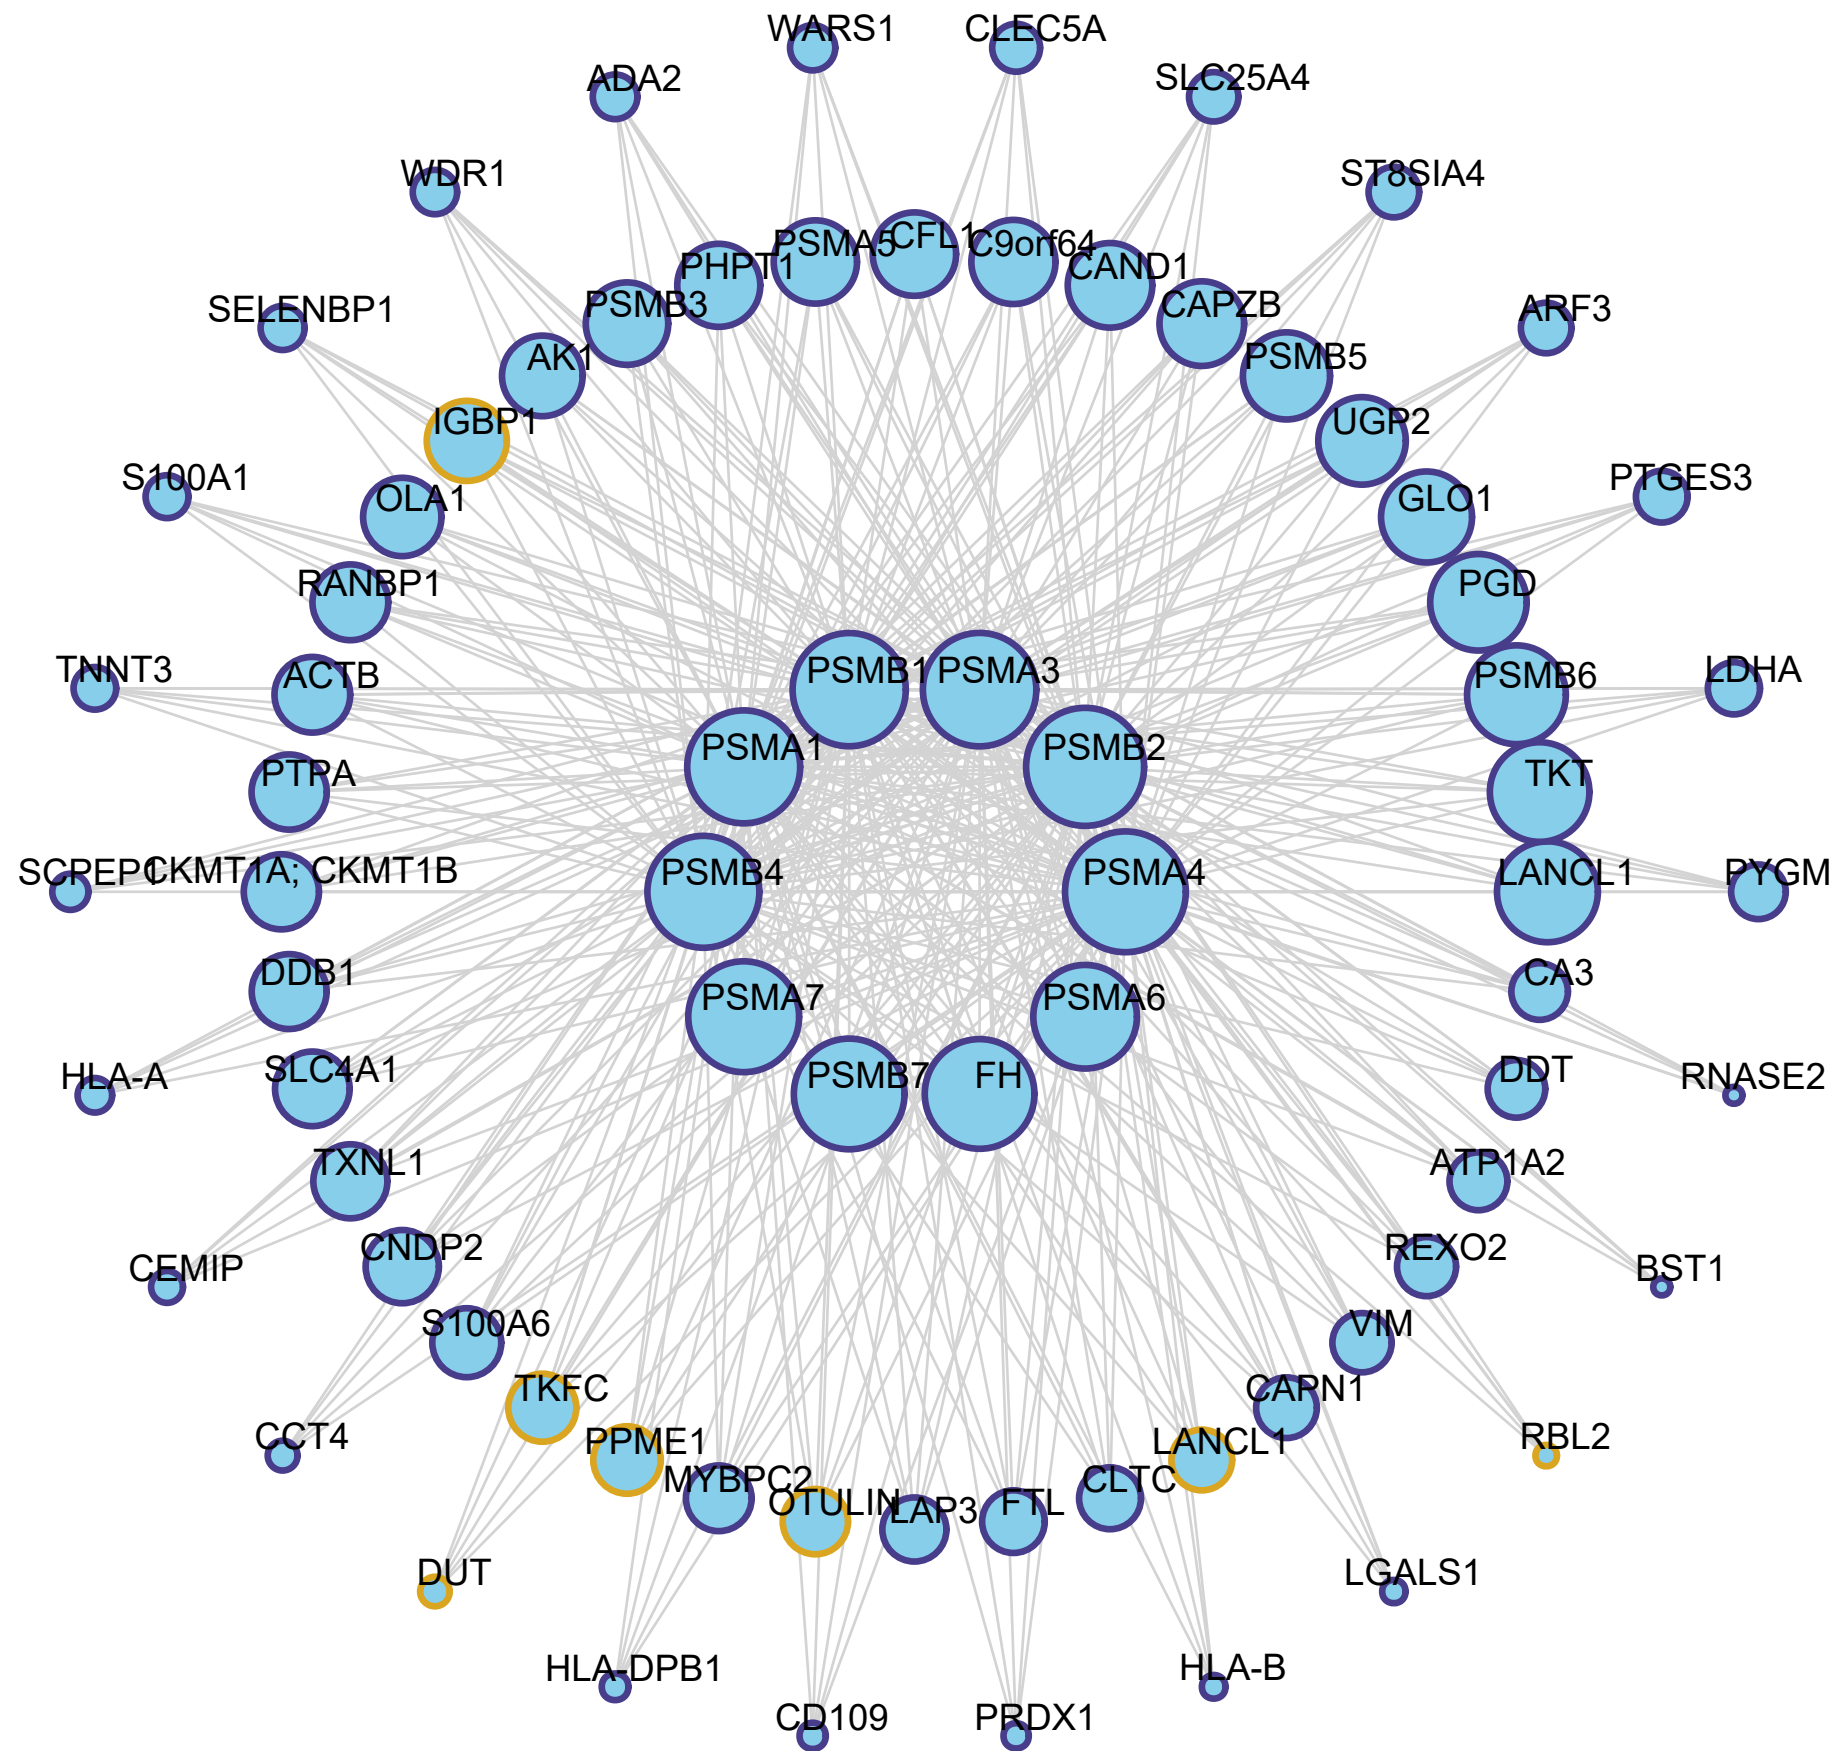

# M16 lightcyan module: Sugar Metabolism

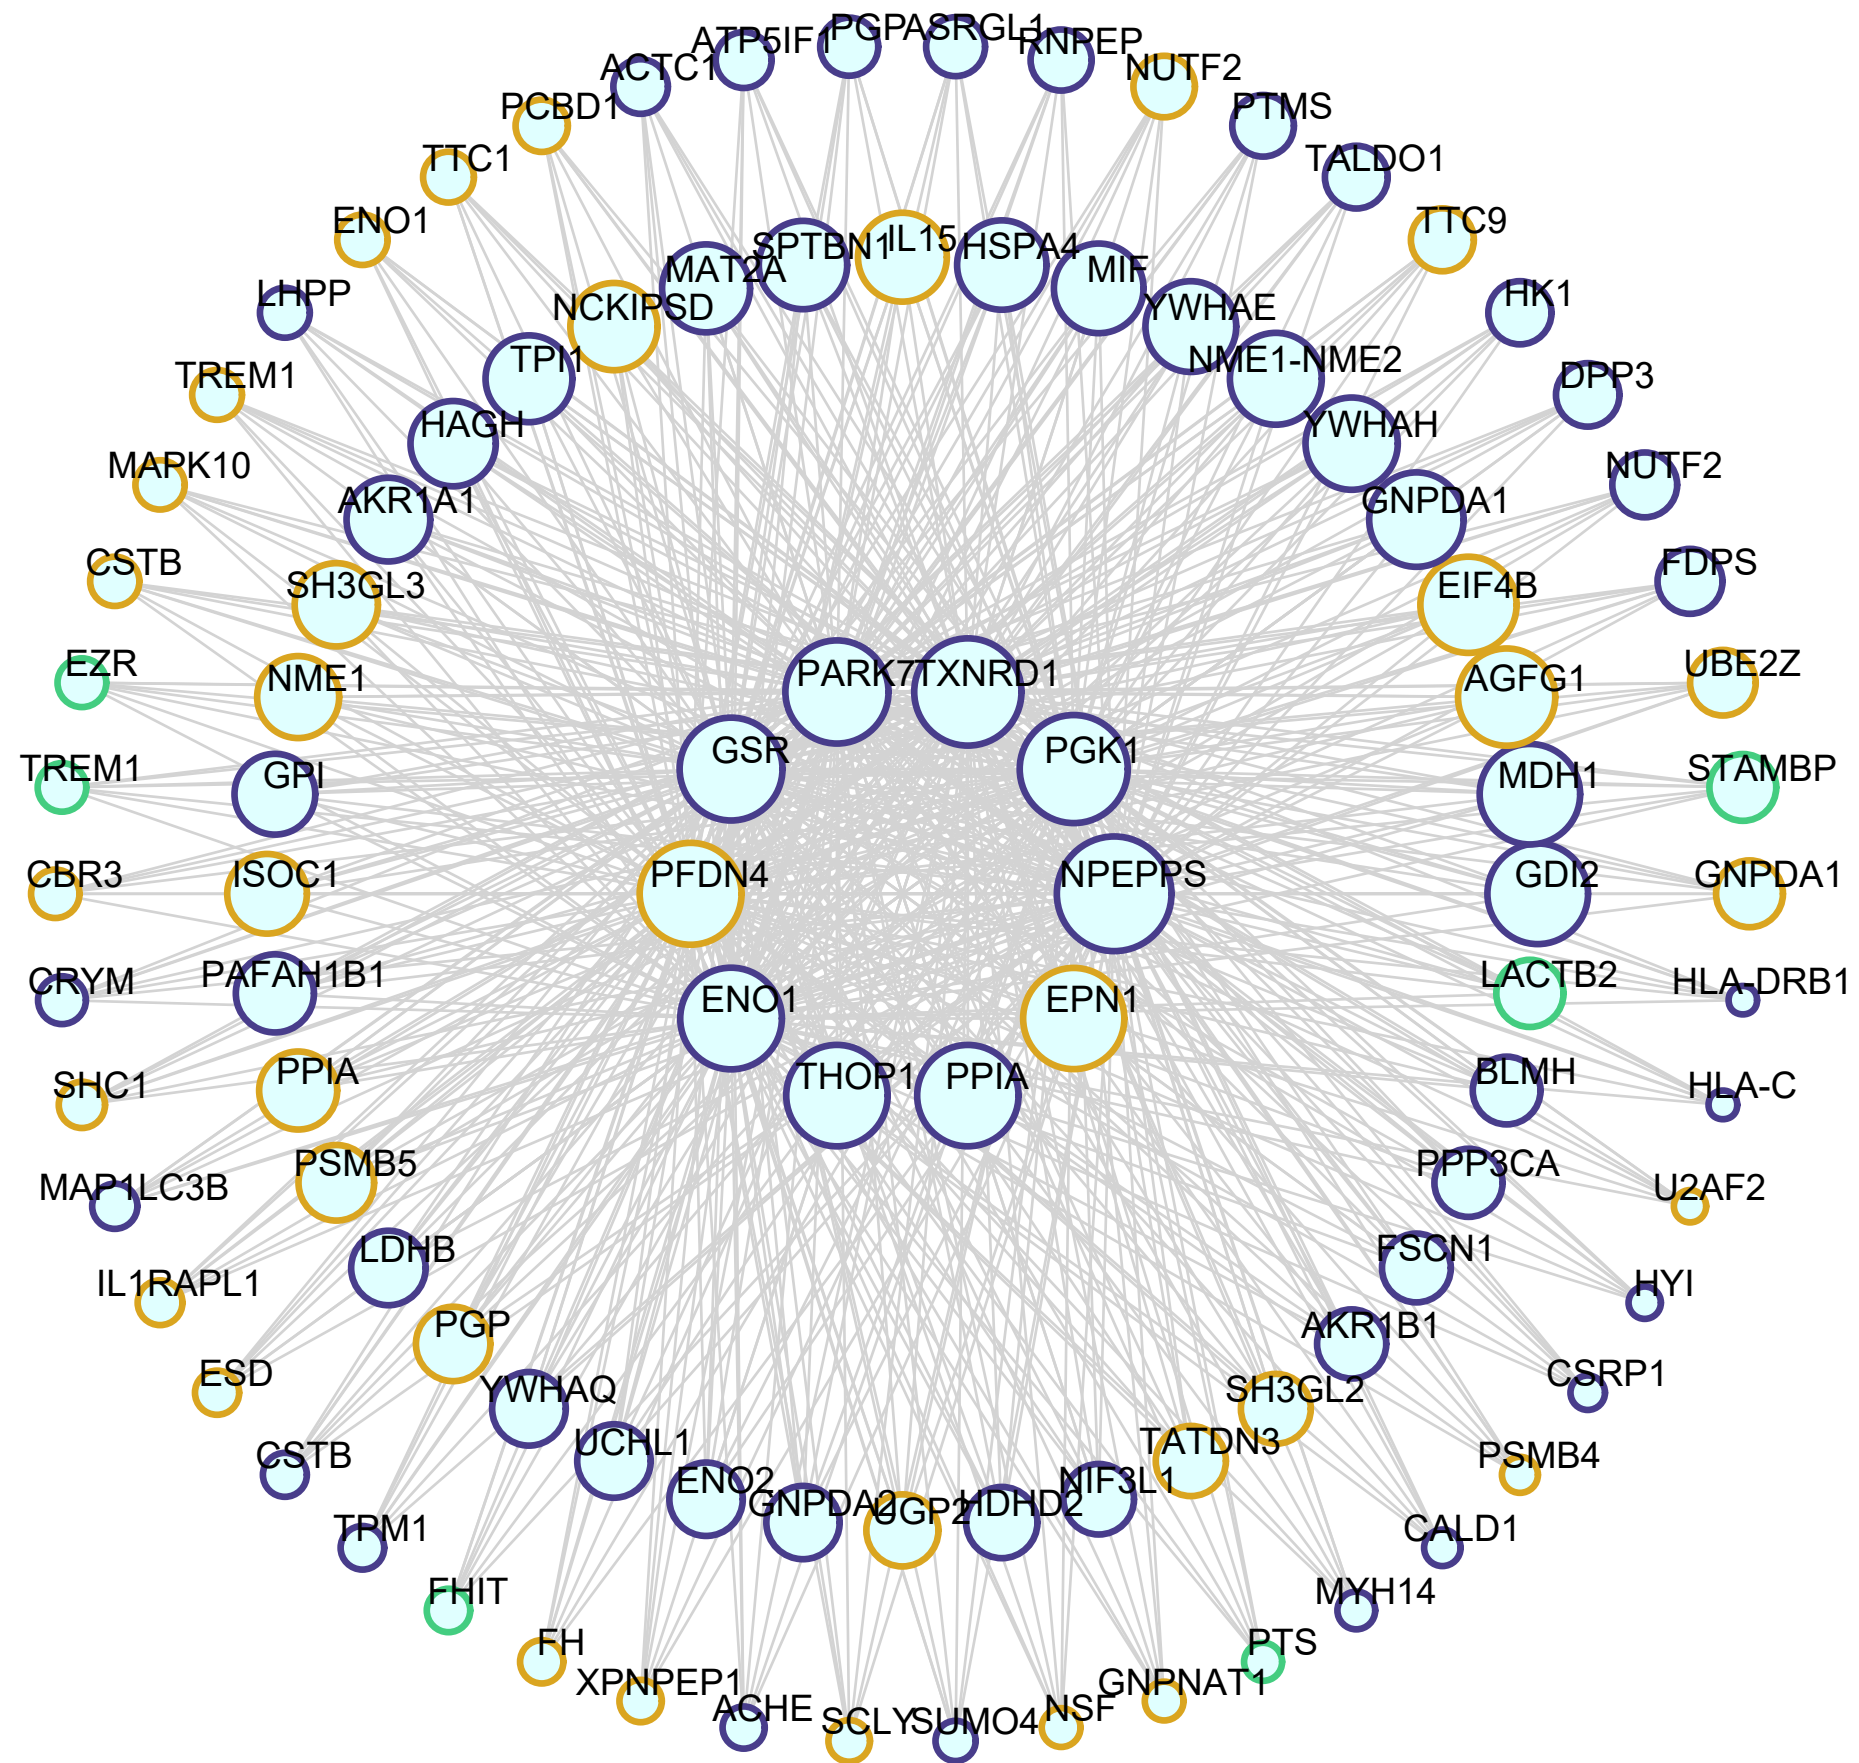

# M29 saddlebrown module: Sugar Metabolism/Actin Depolymerization

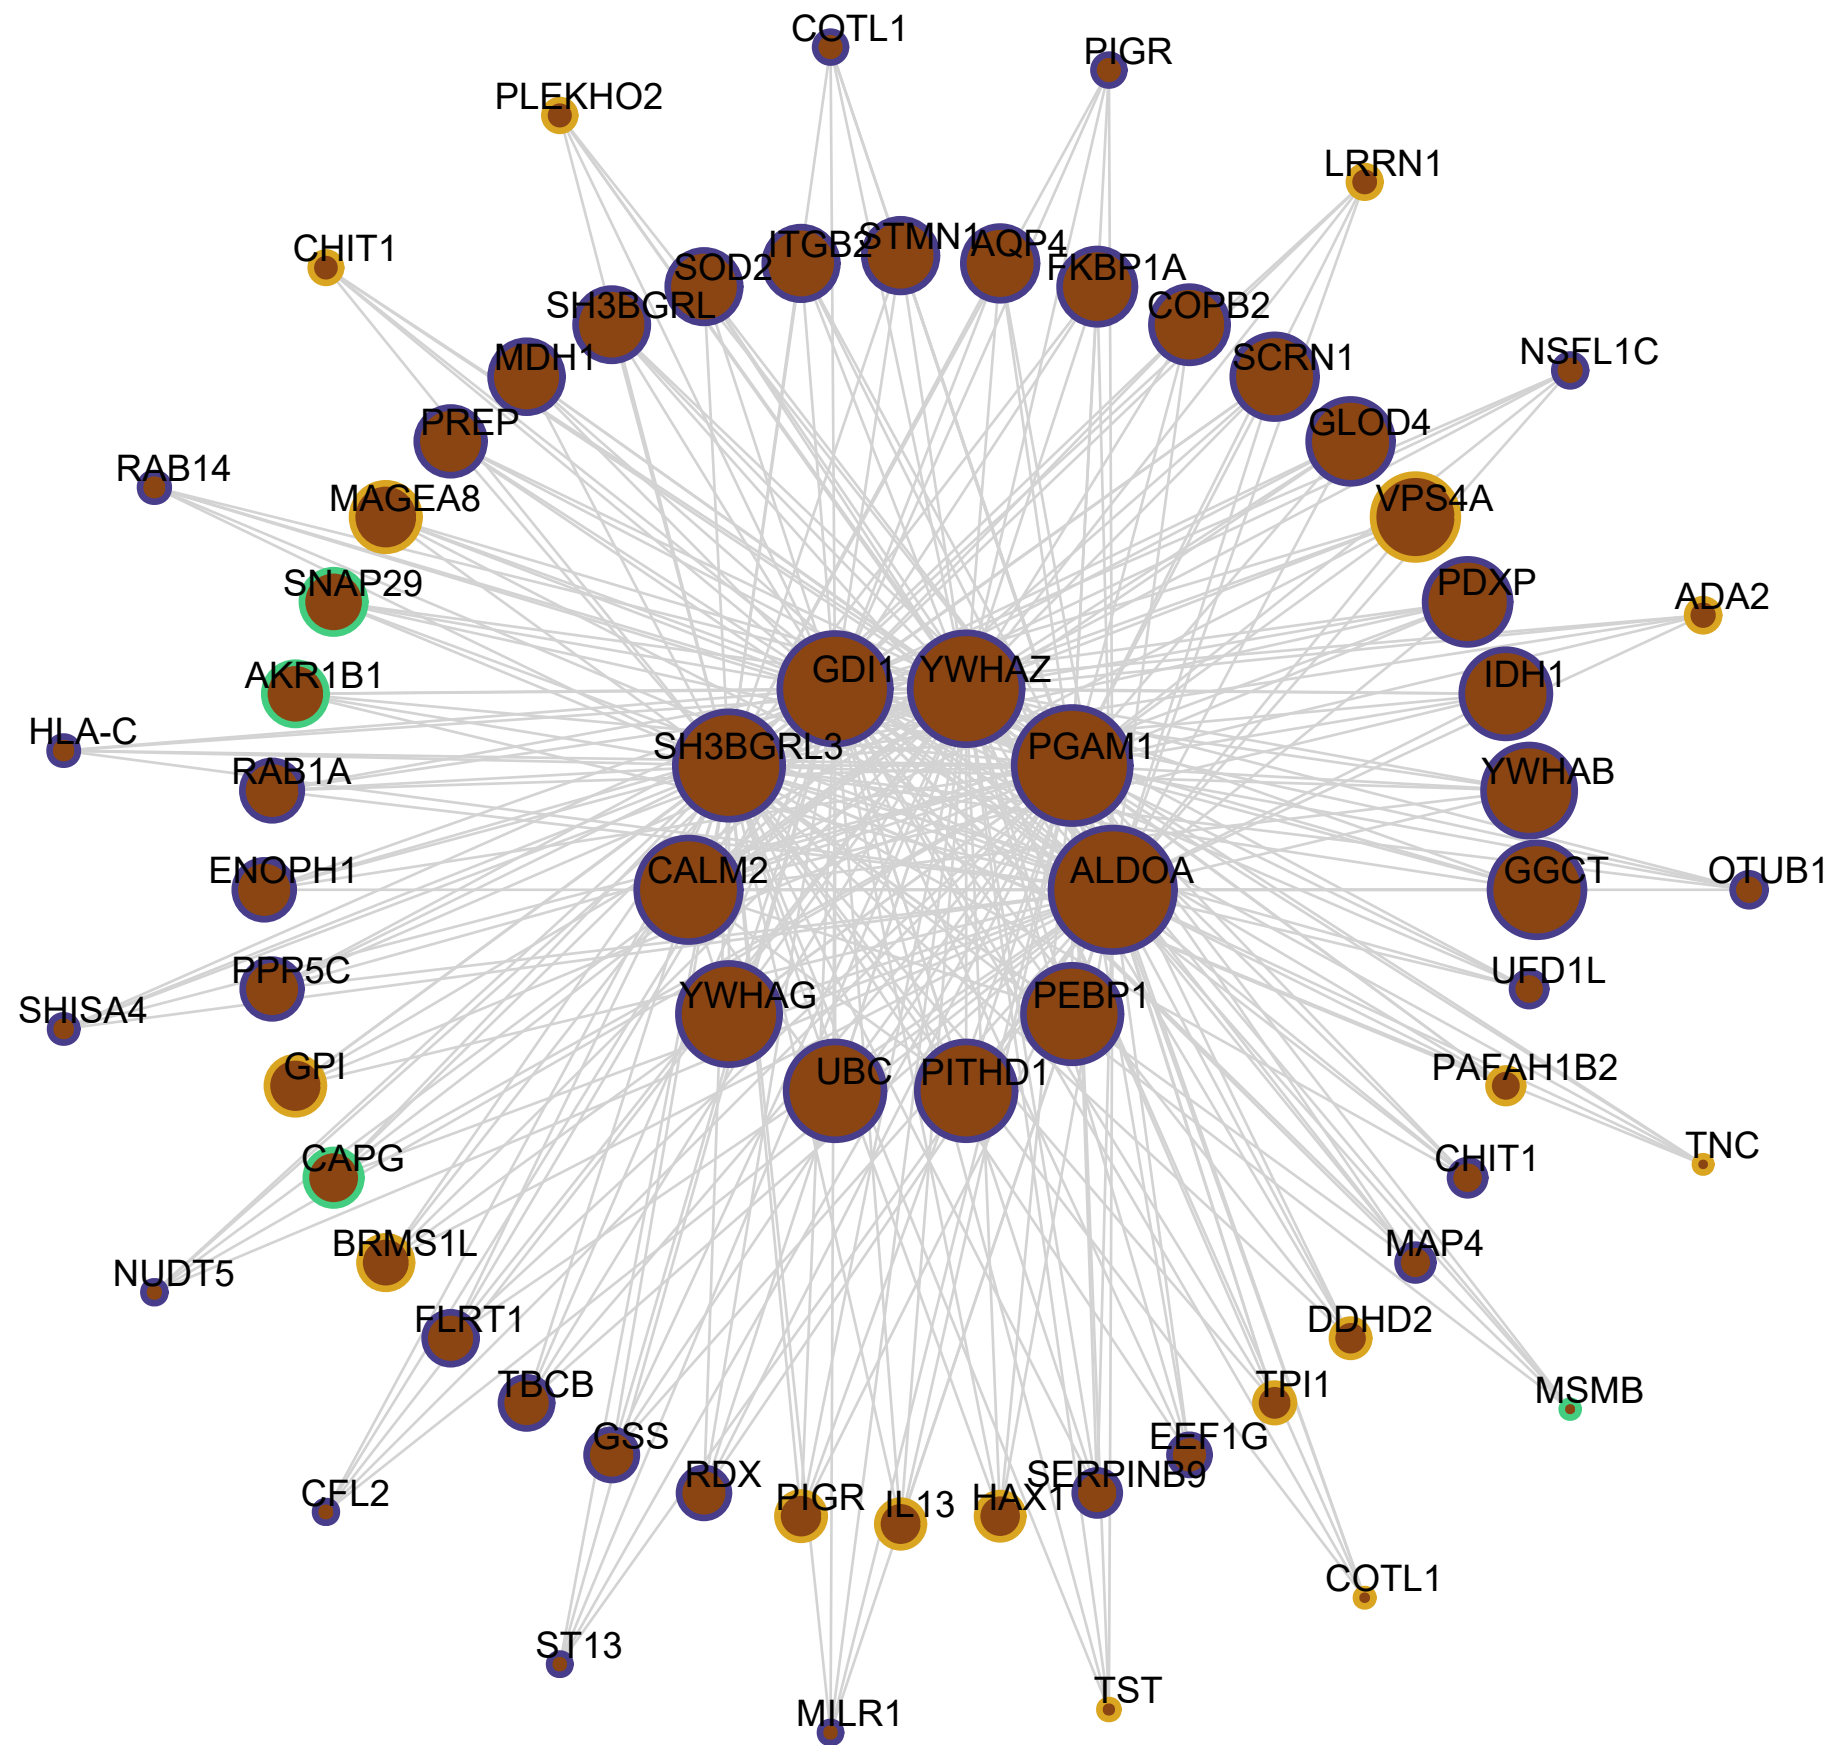

## M24 darkgrey module: Ubiquitination

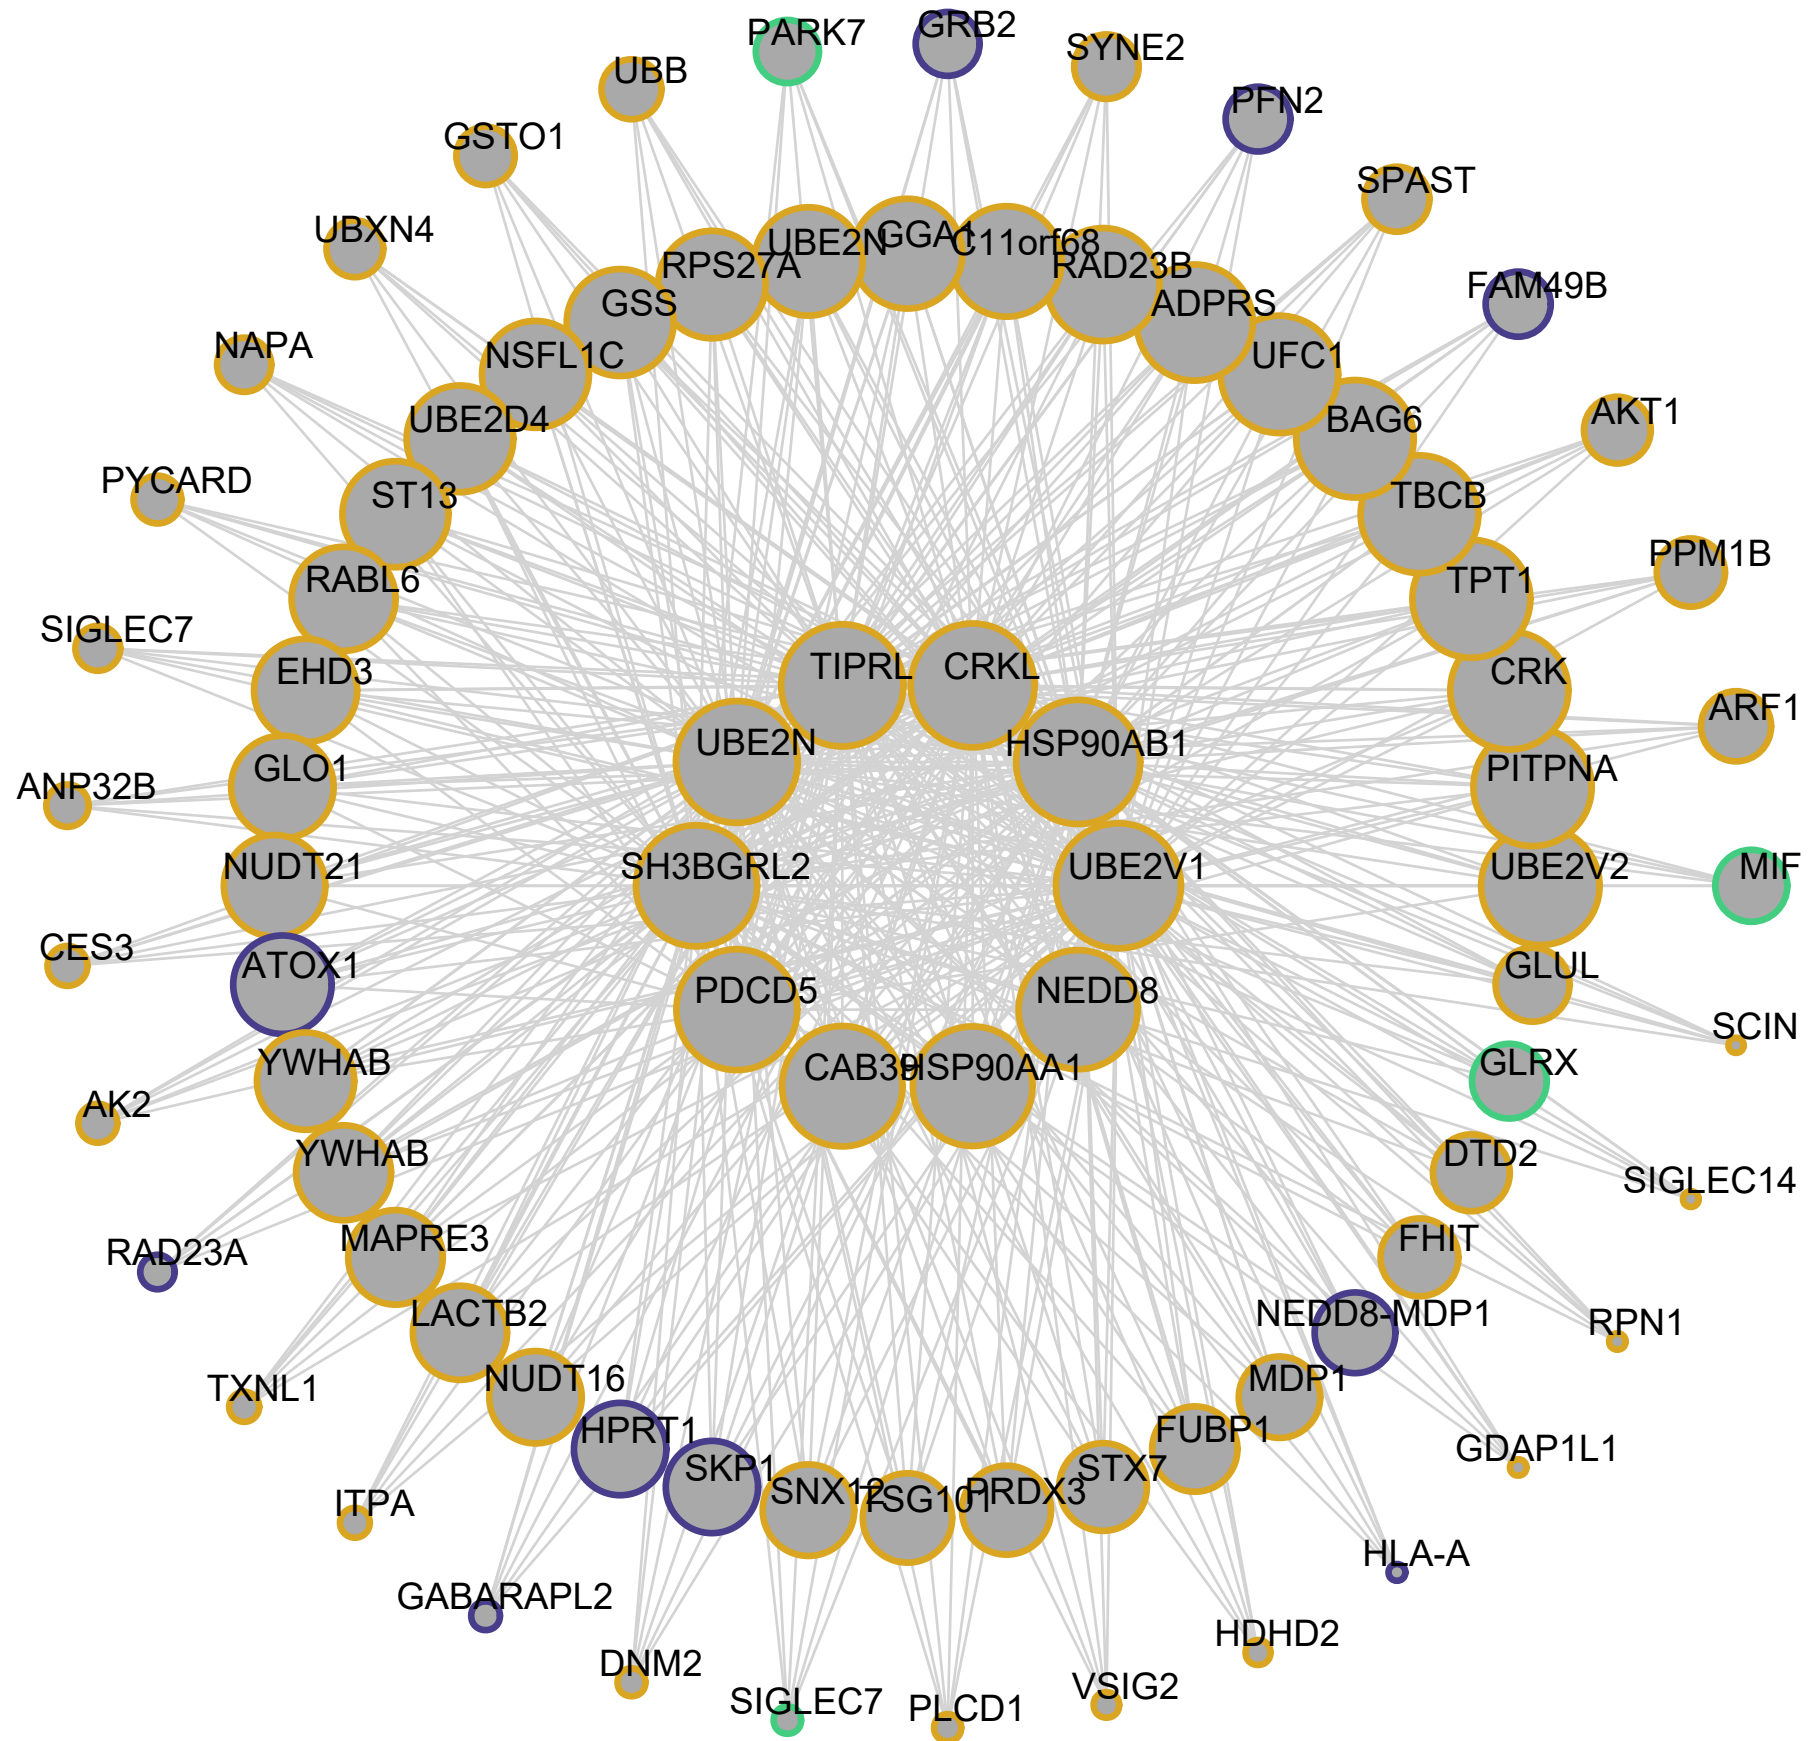

### M35 sienna3 module: Ambiguous

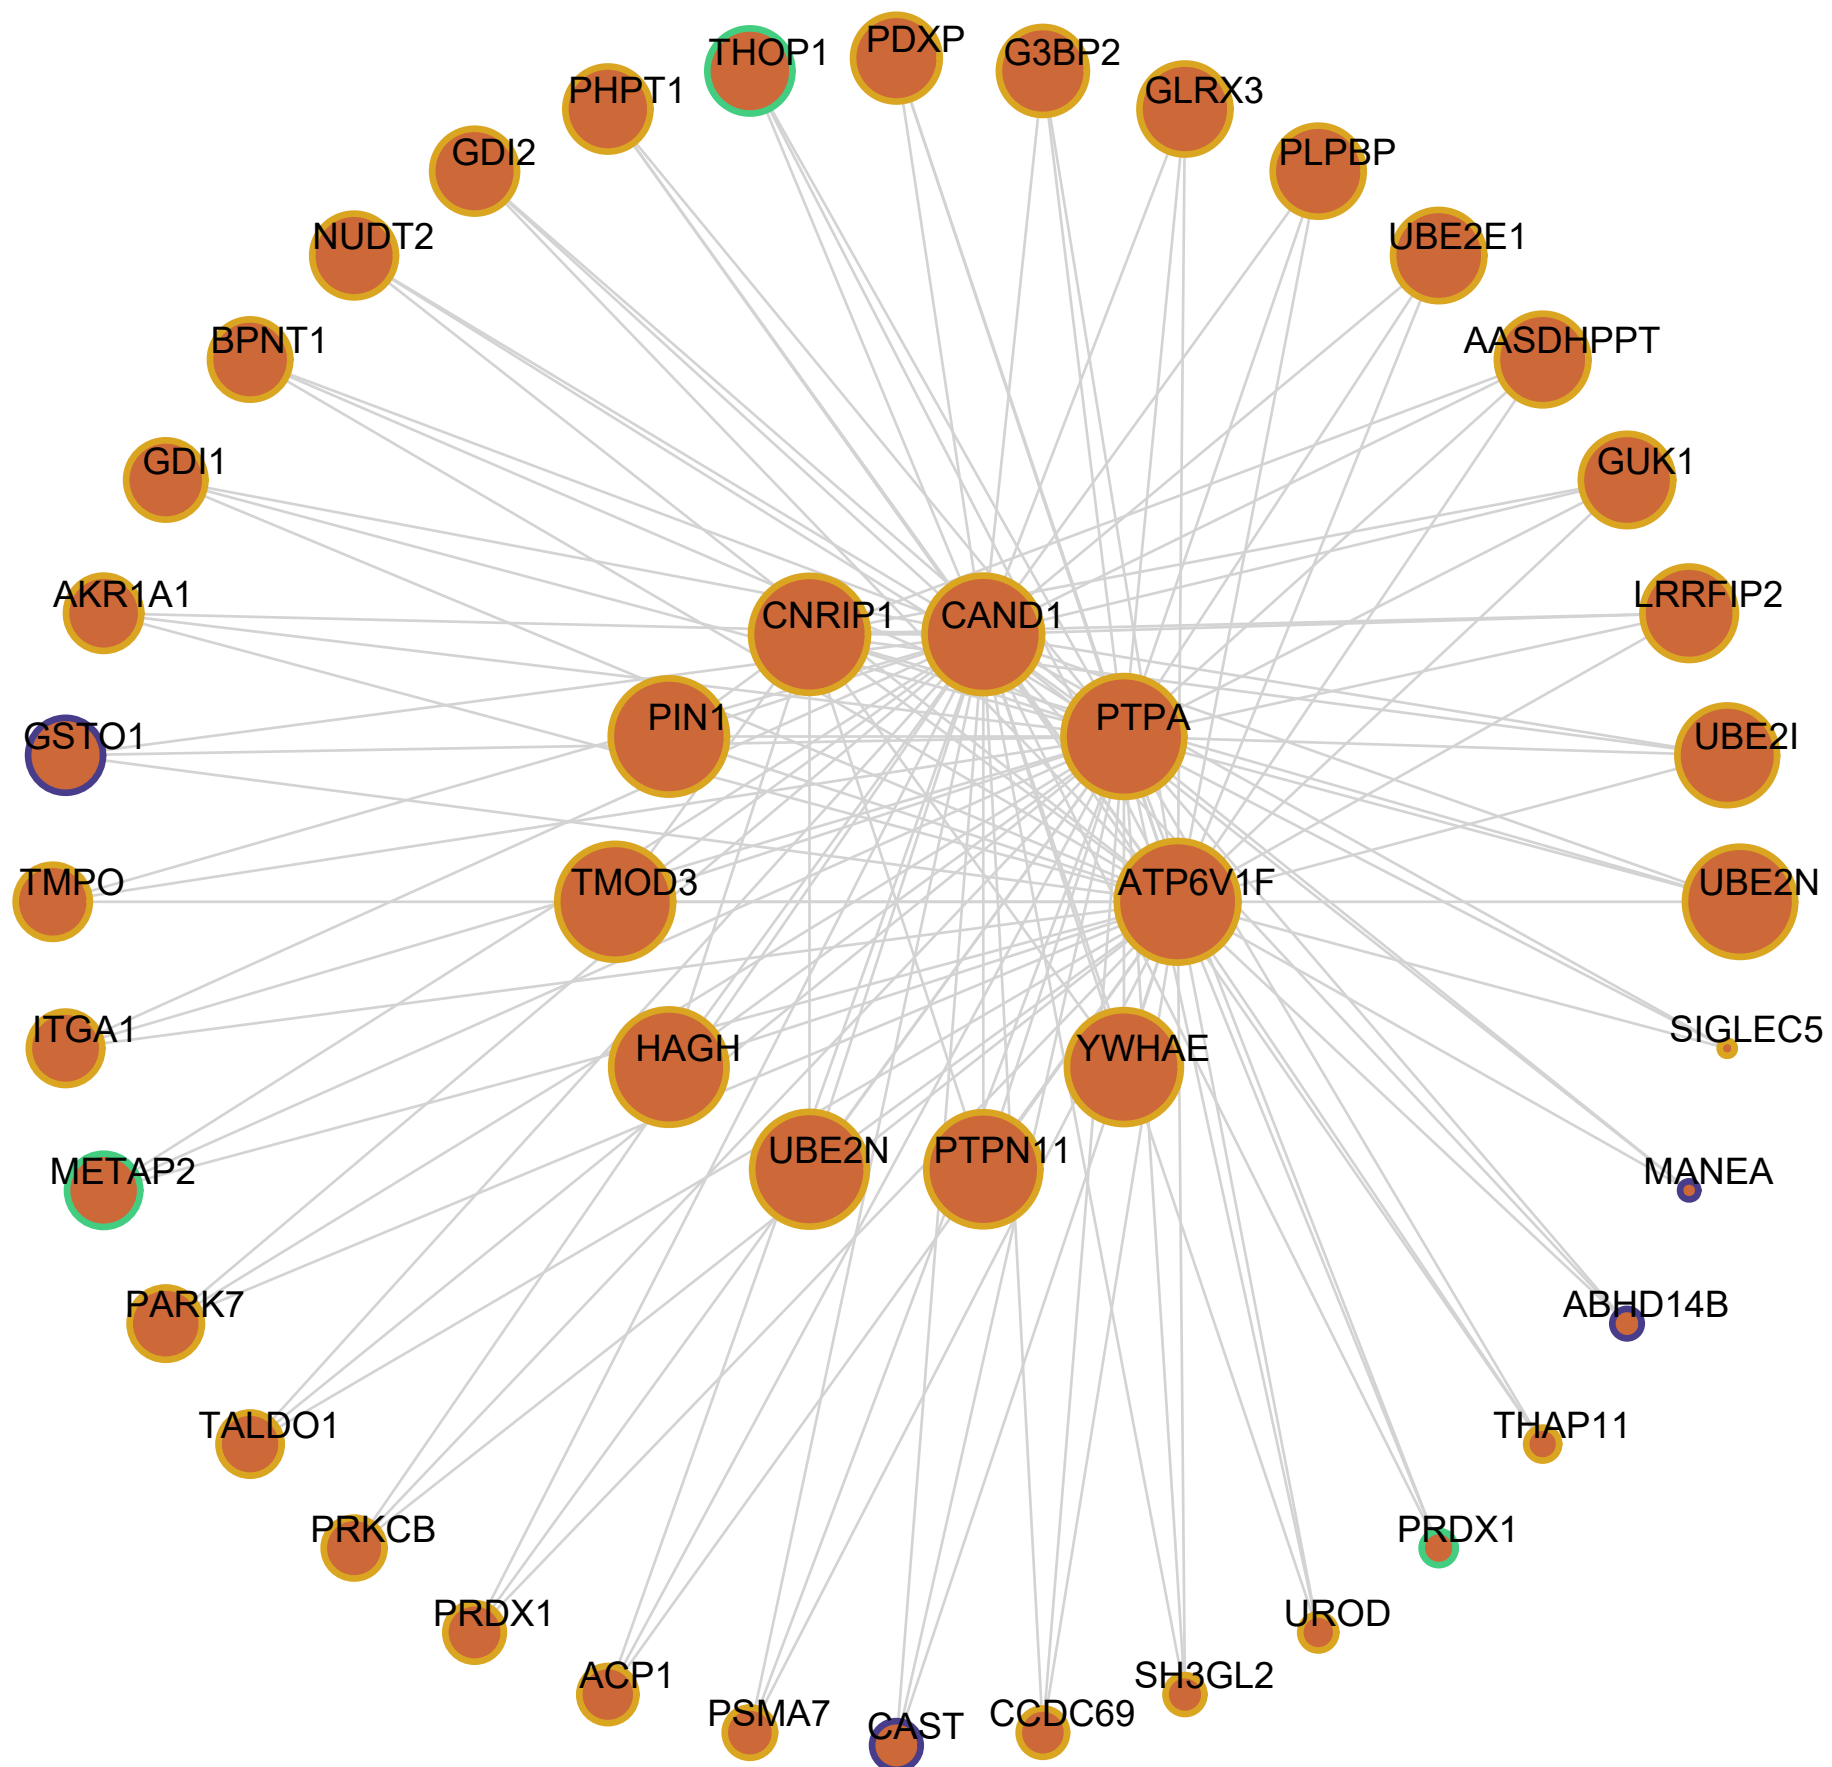

M33 darkolivegreen module: Translation/Sugar Binding

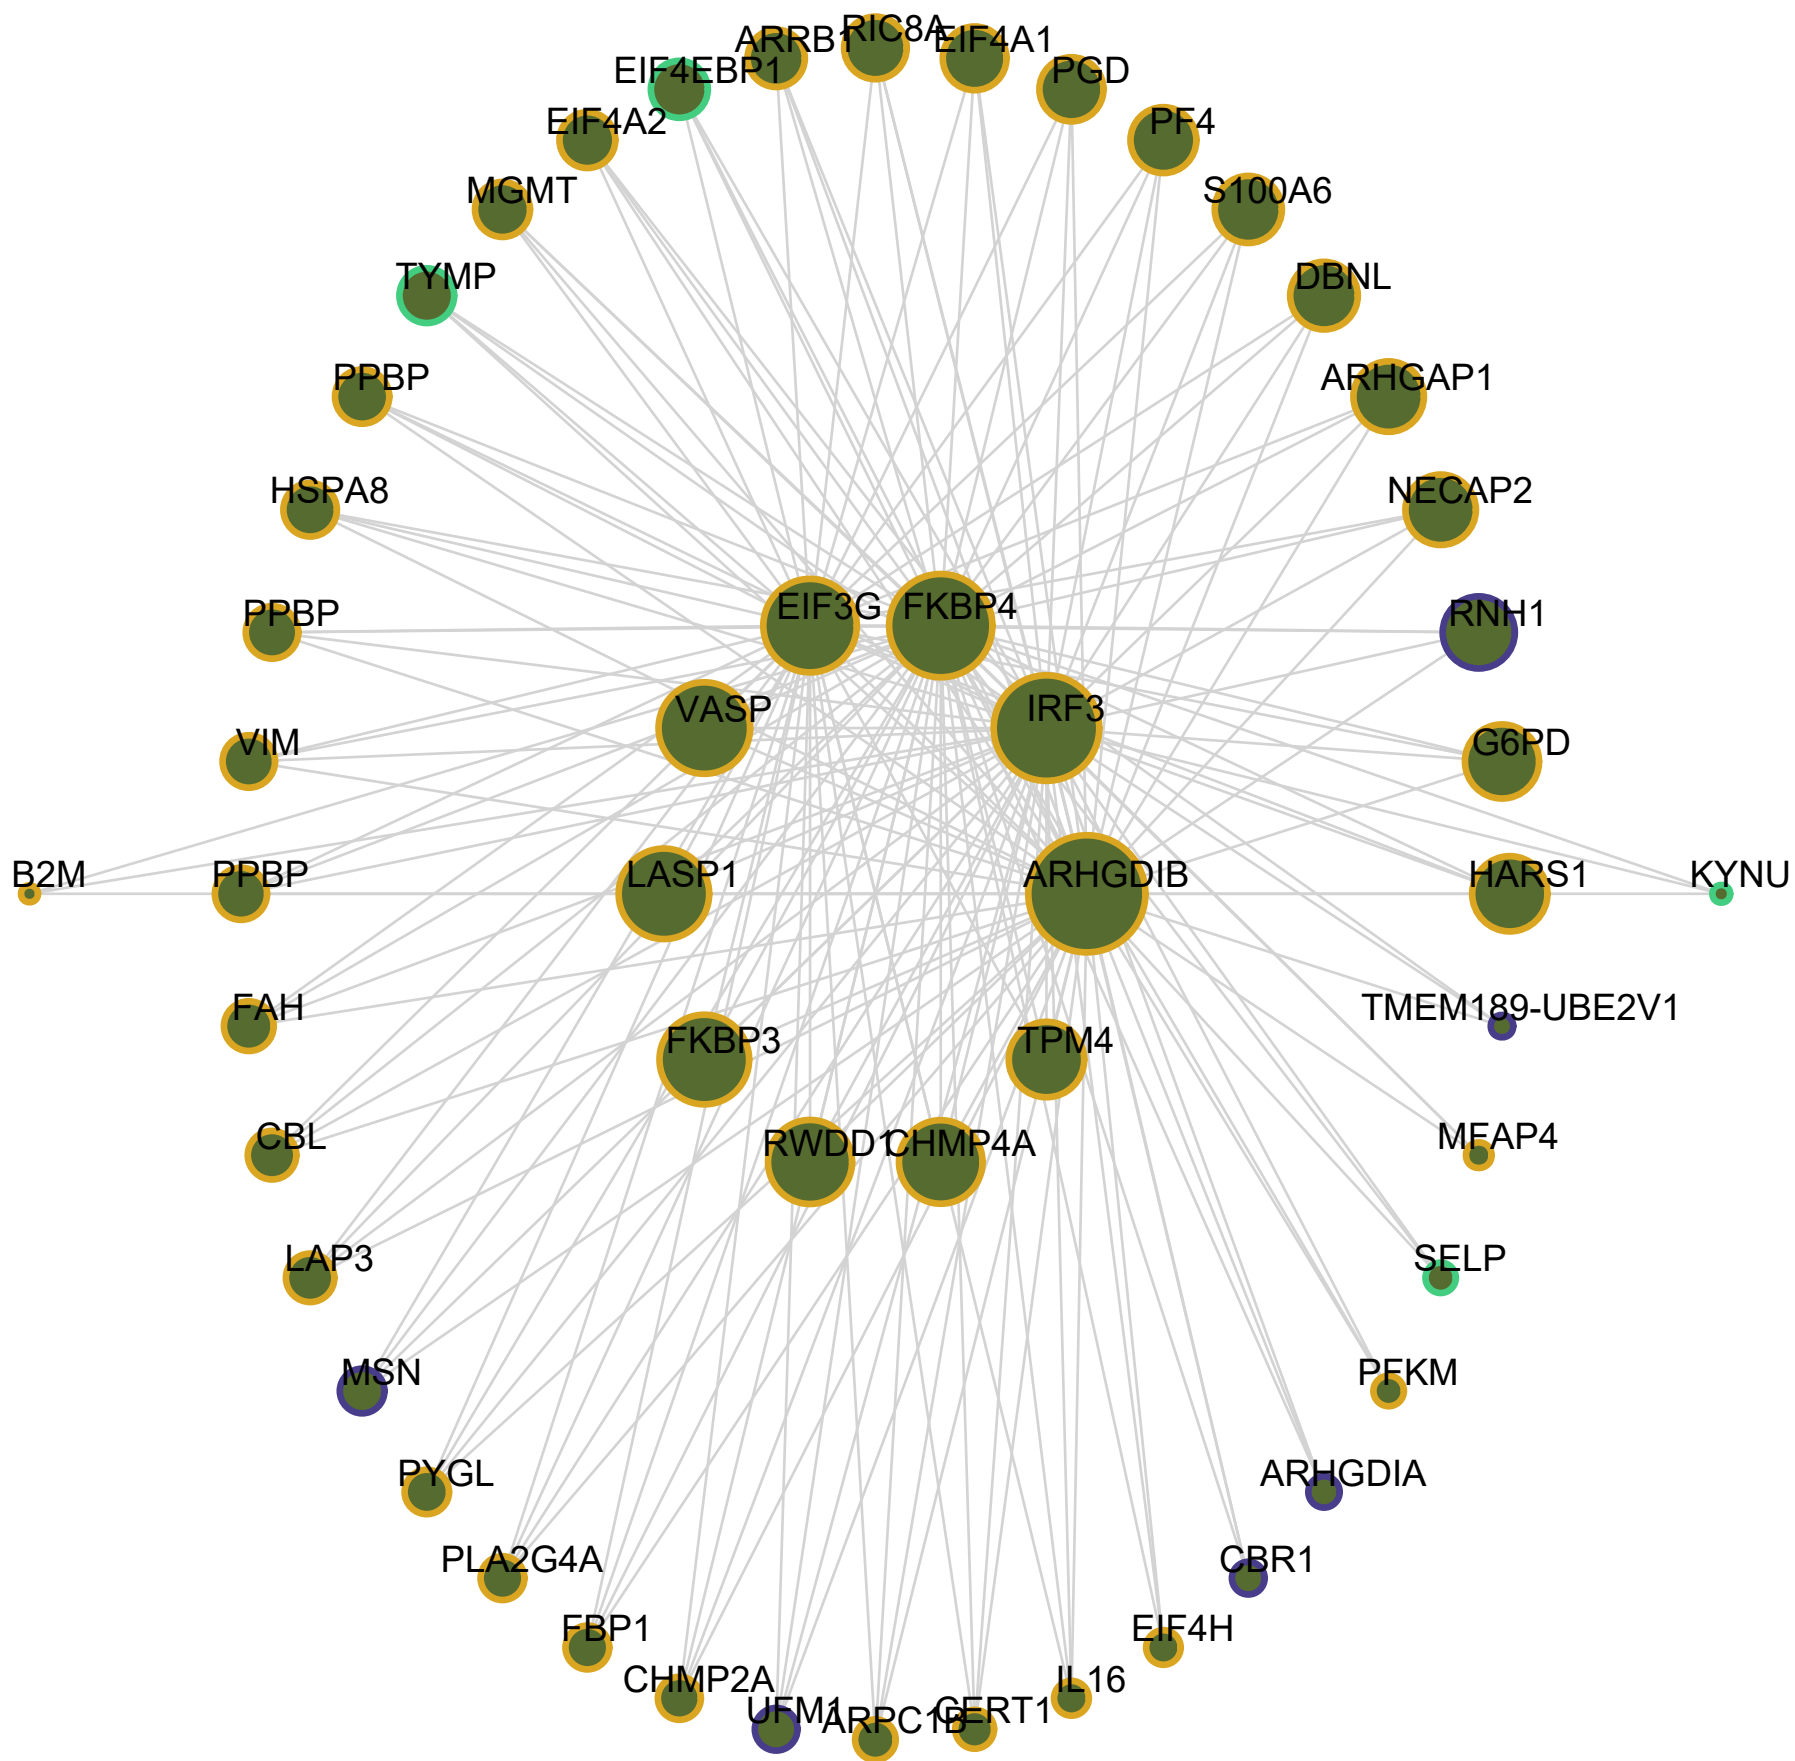

### M36 yellowgreen module: Organelle Organization/Biogenesis

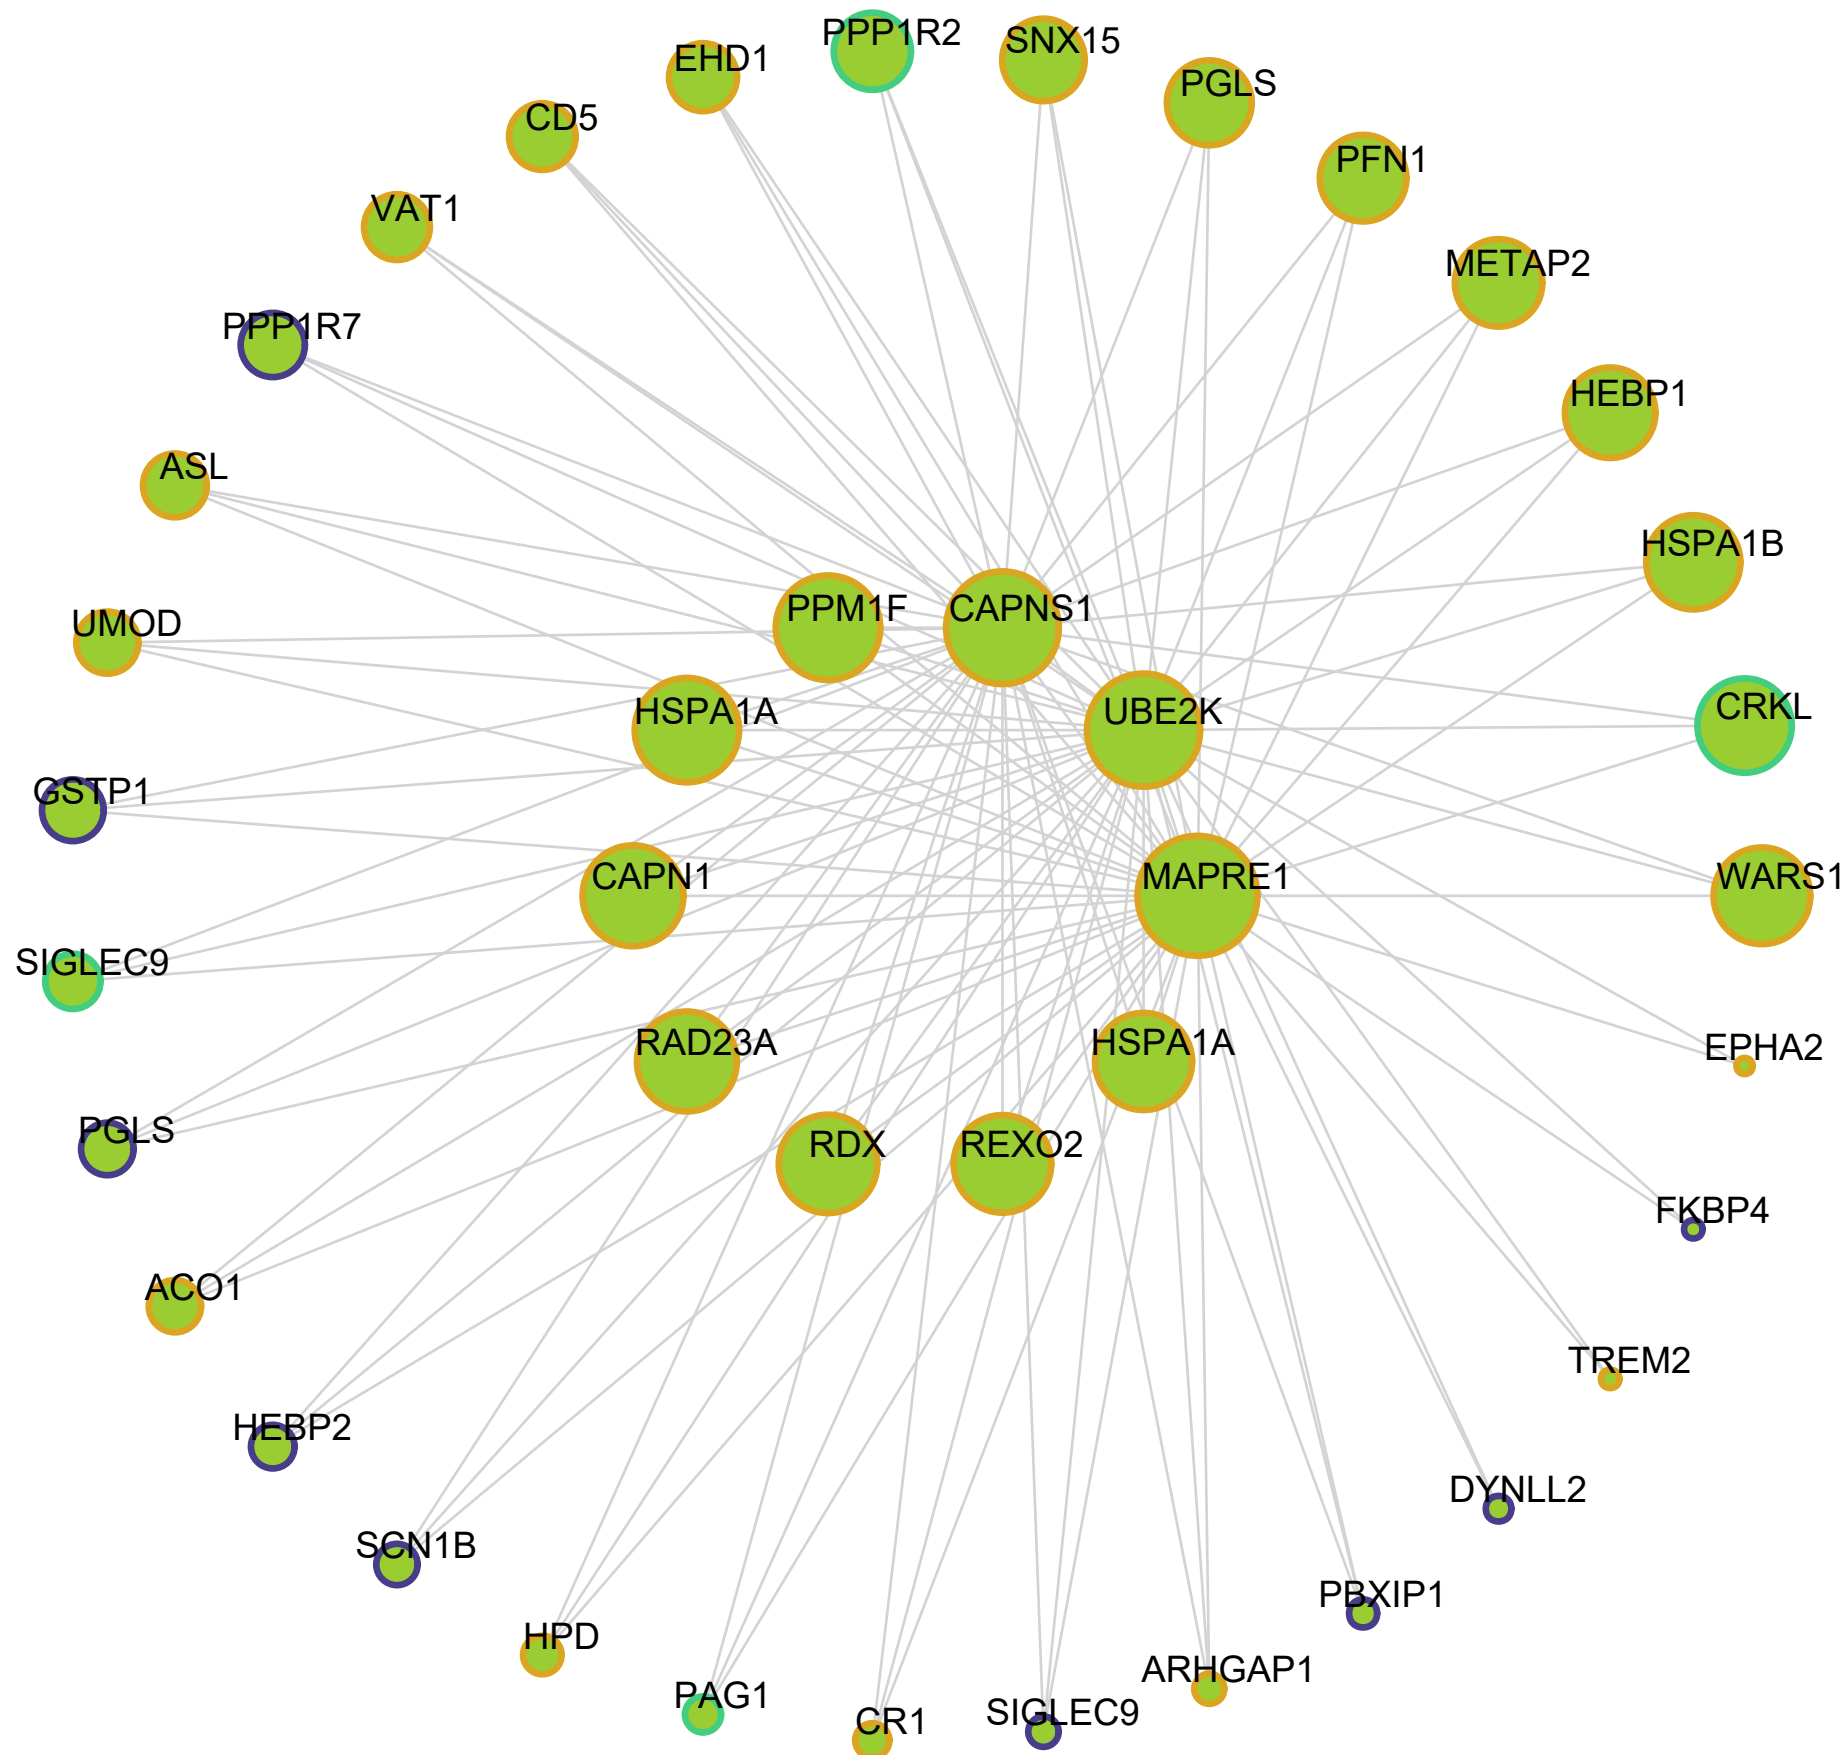





M4 yellow module: Lysosome

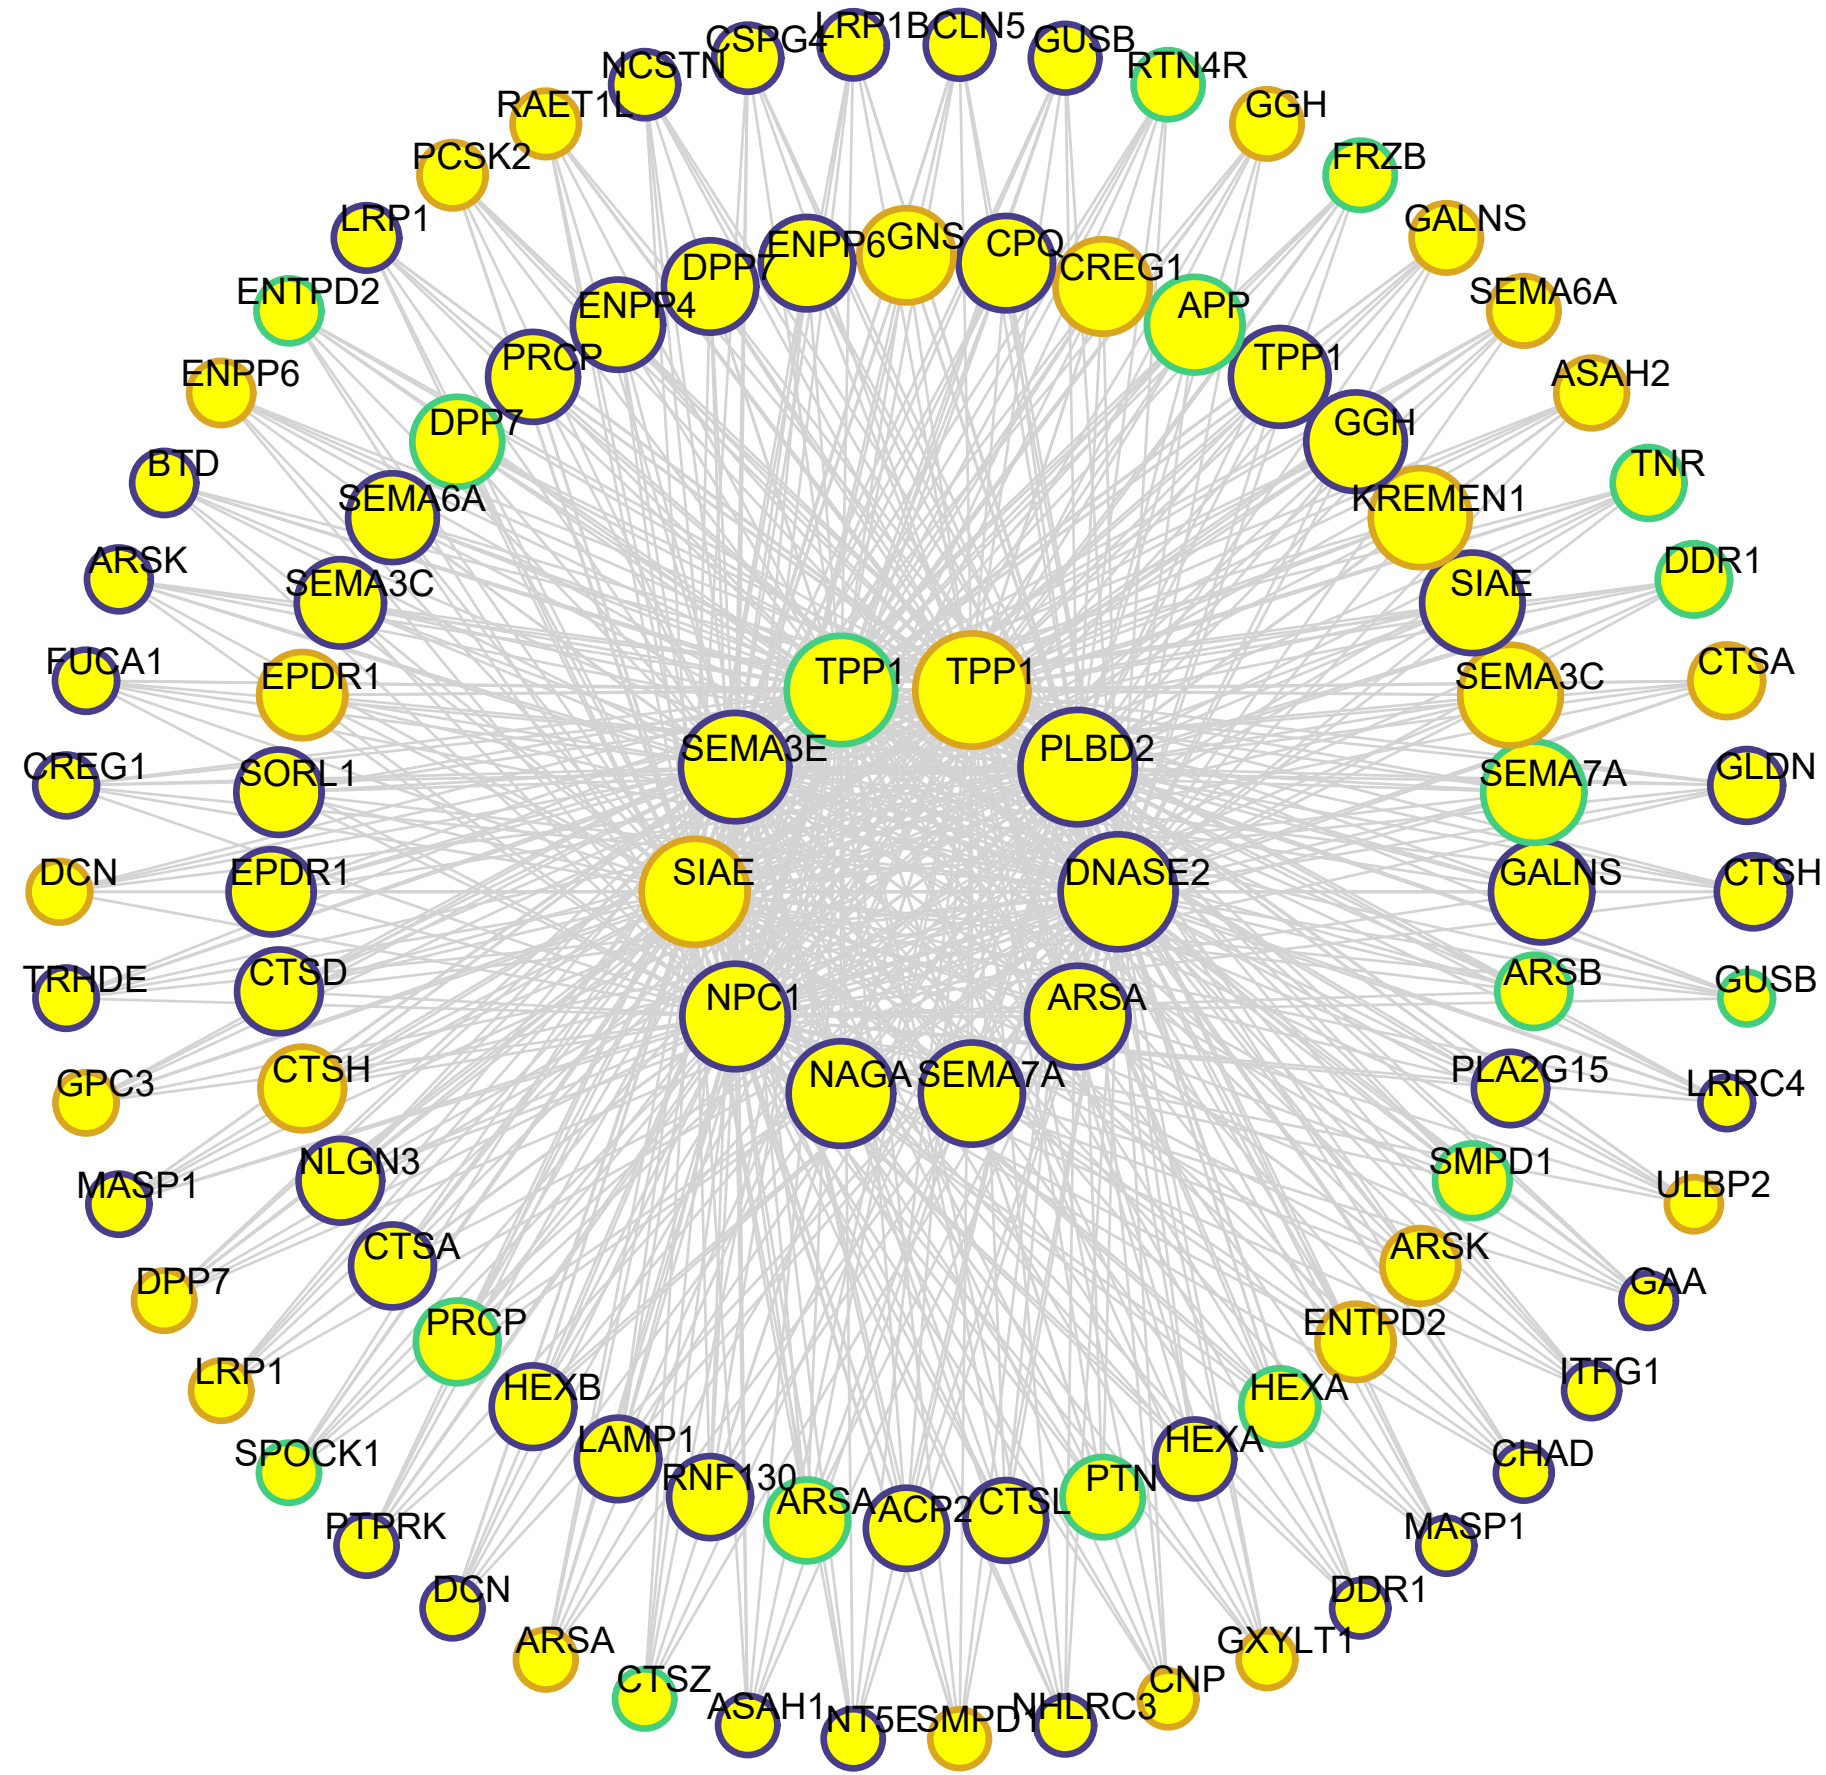

### M23 darkturquoise module: Nucleic Acid/Steroid Metabolism

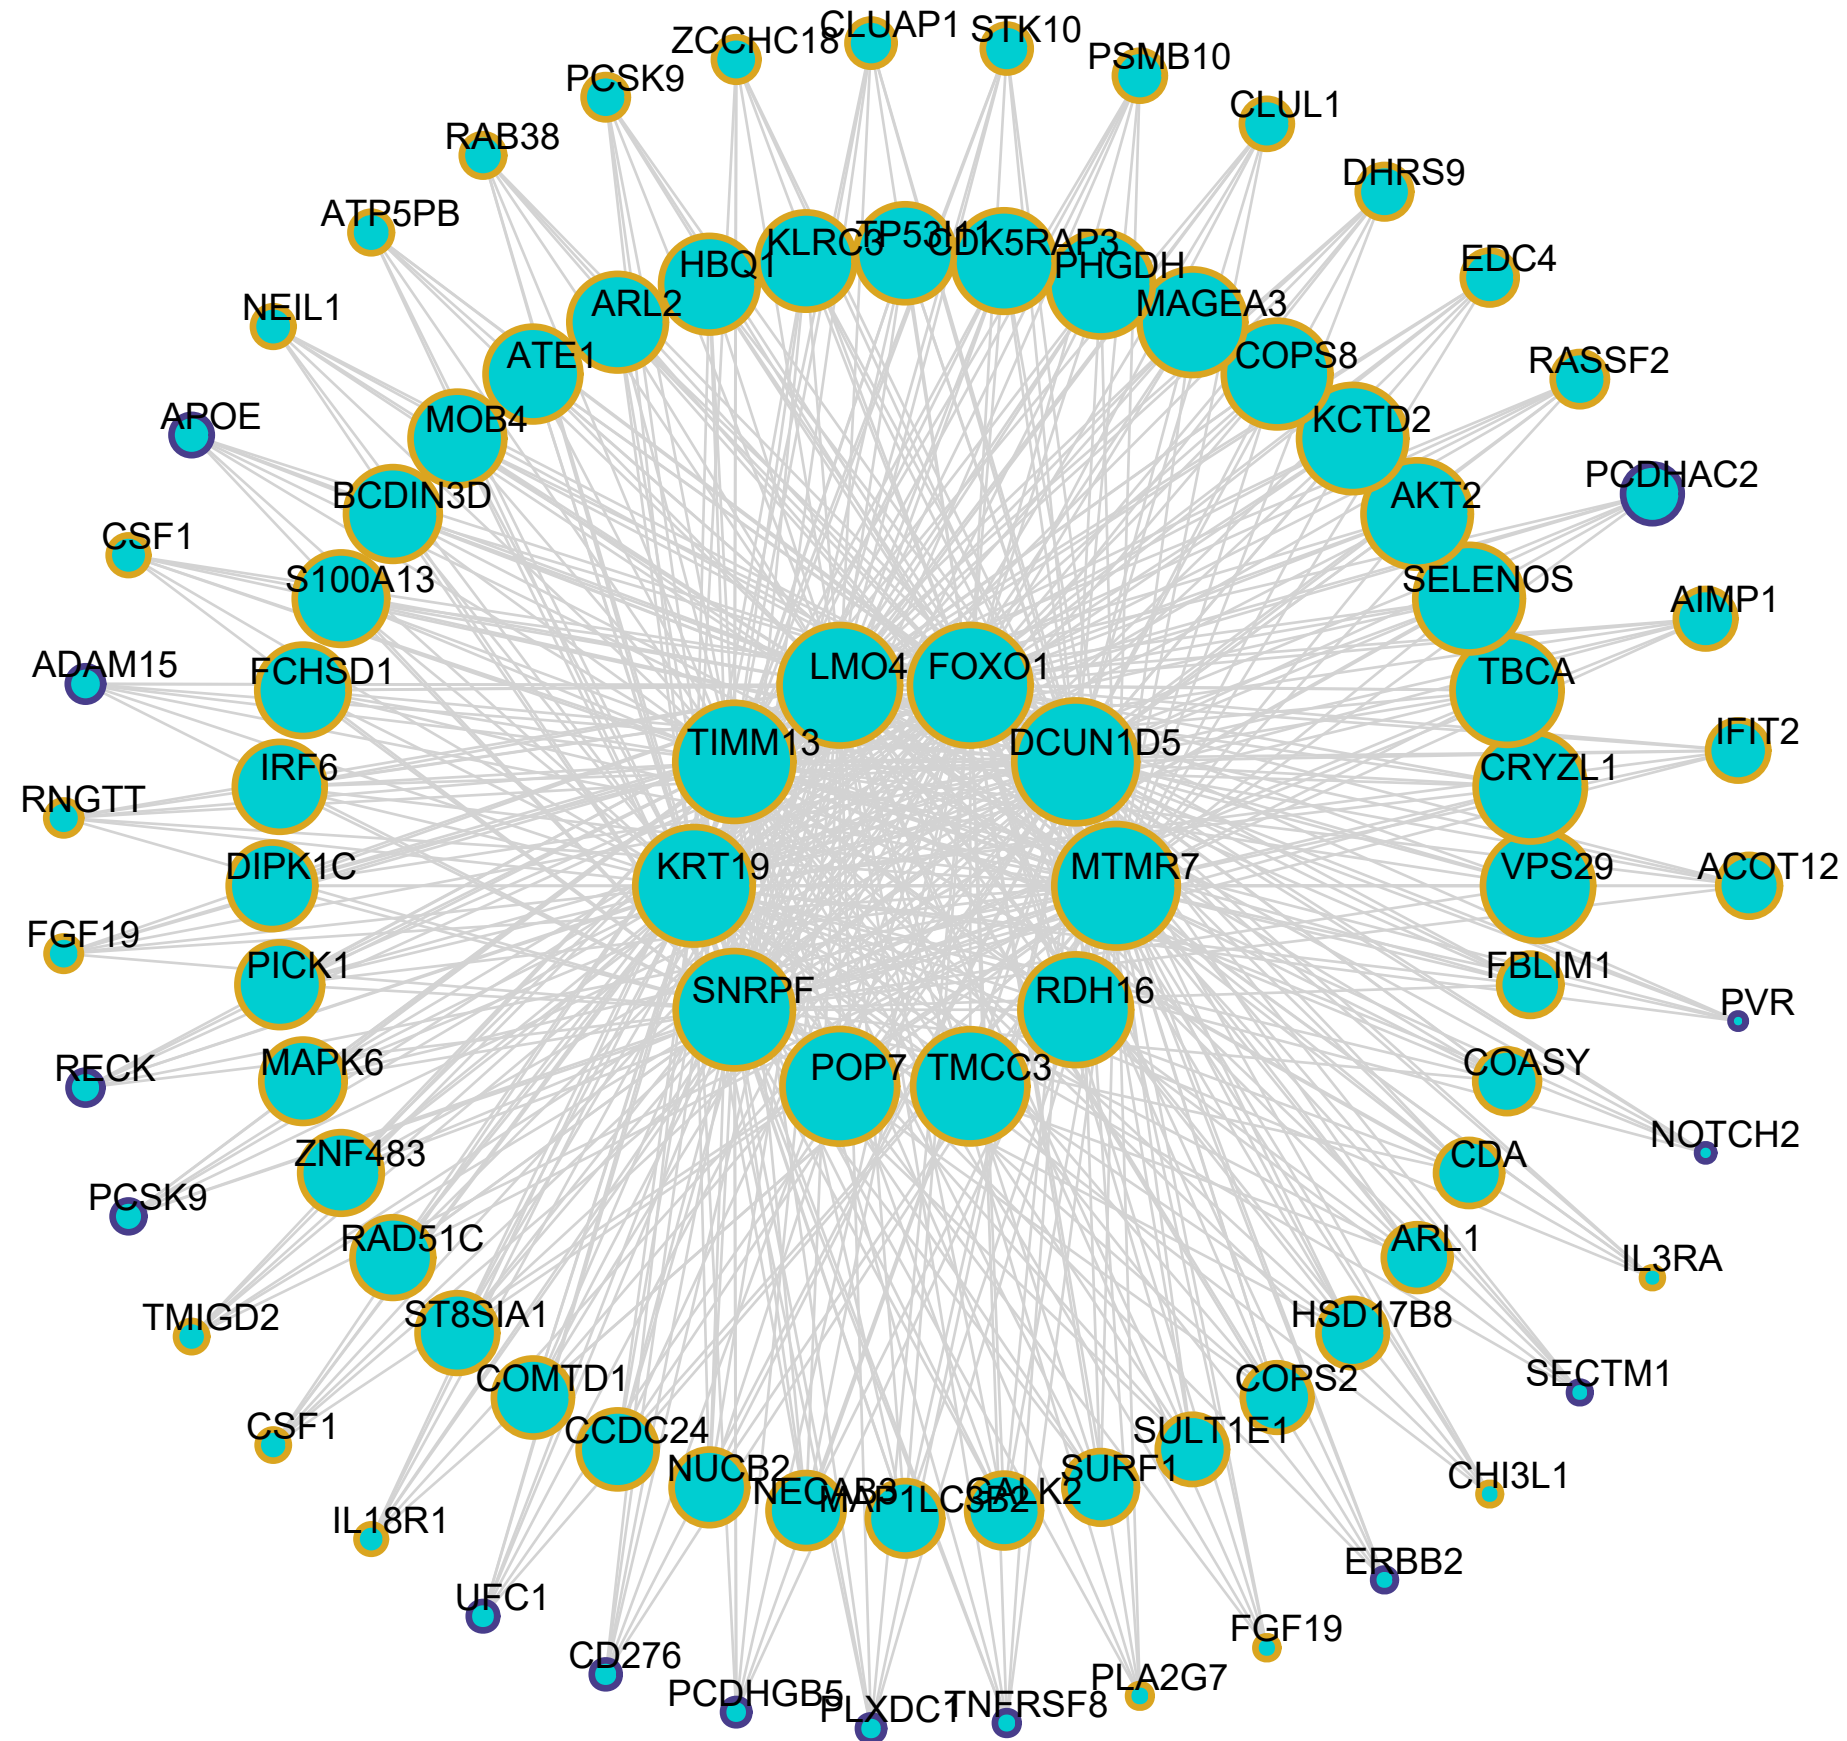

# M20 royalblue module: Ambiguous

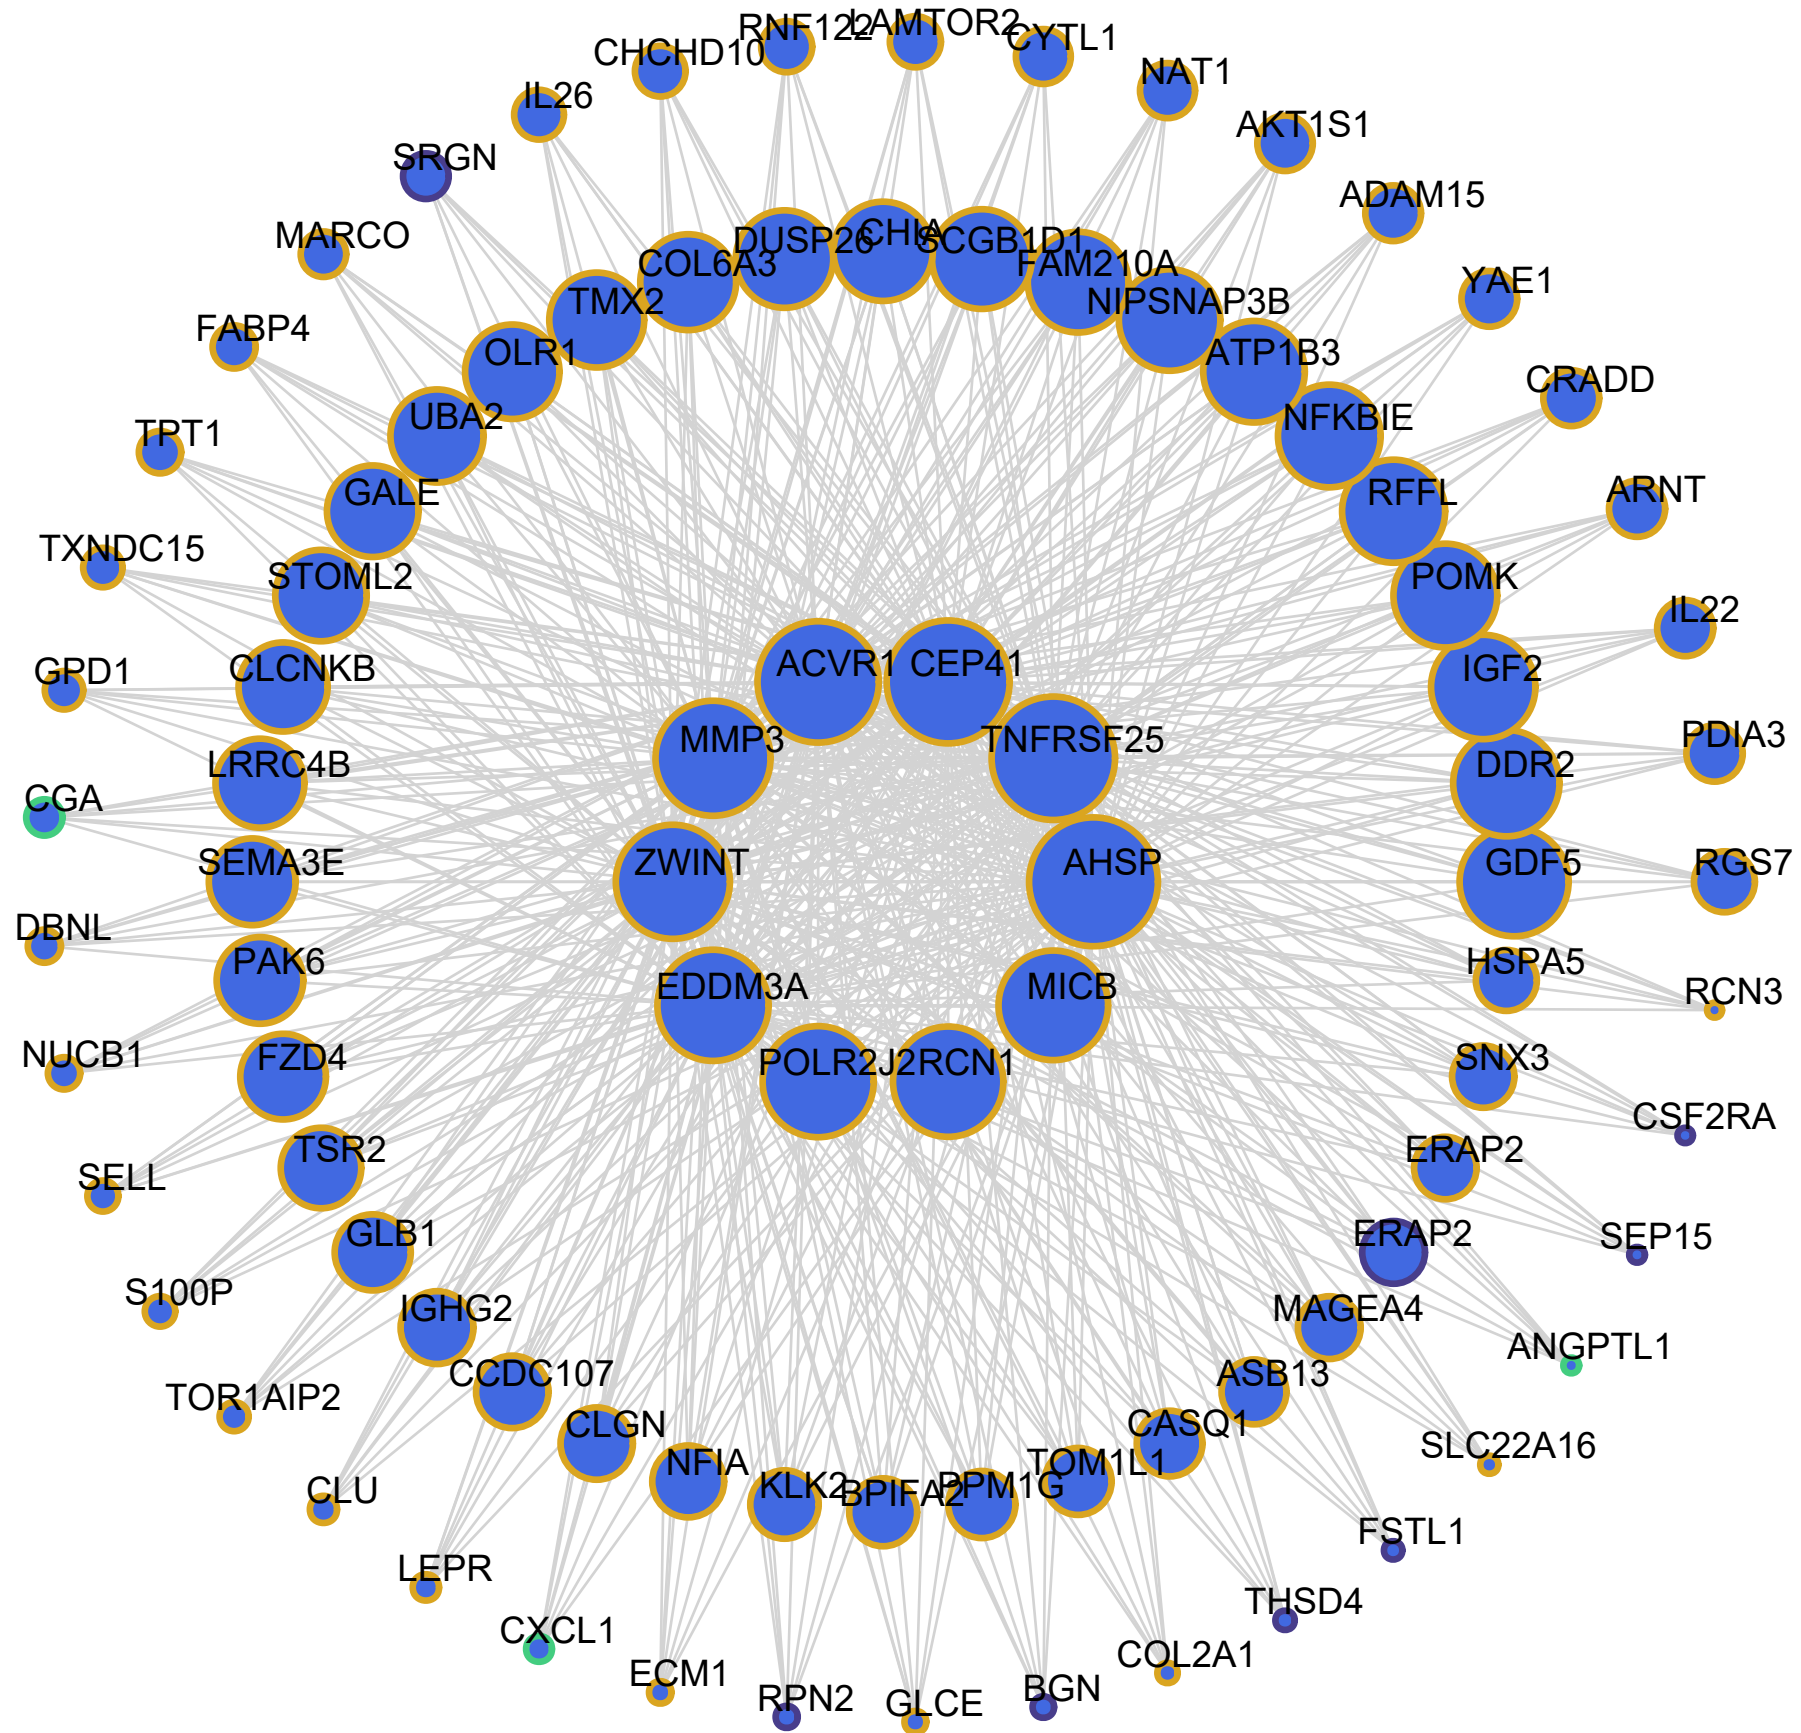

# M22 darkgreen module: ECM/Actin Binding

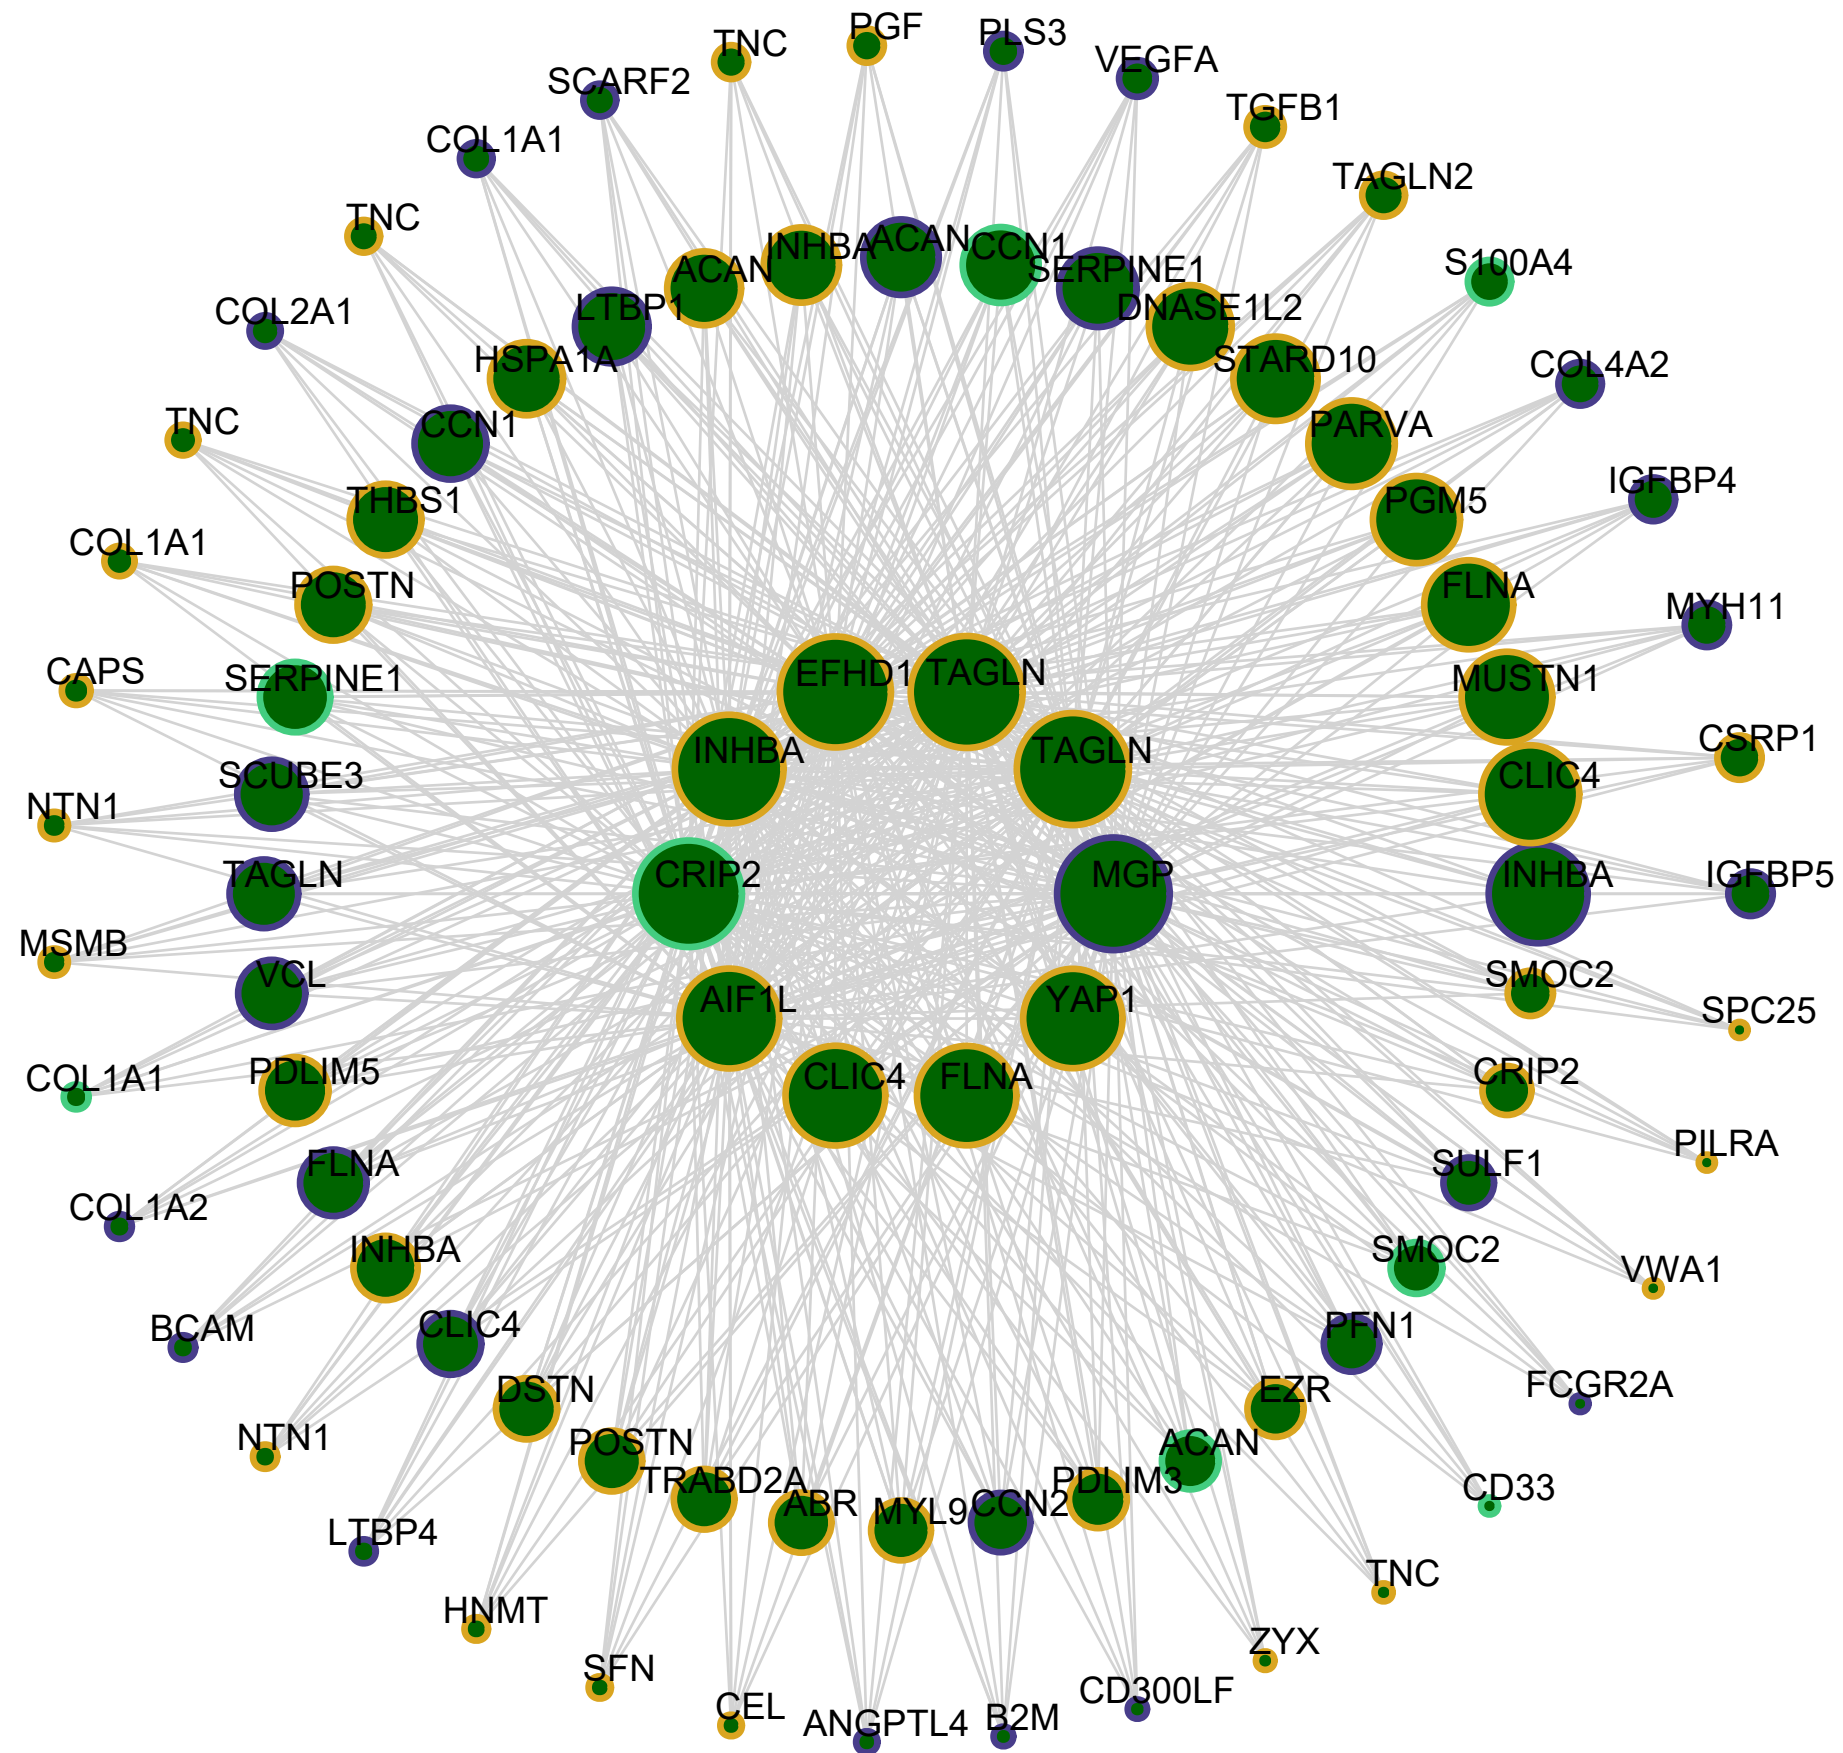

# M26 darkorange module: TGF-? Signaling

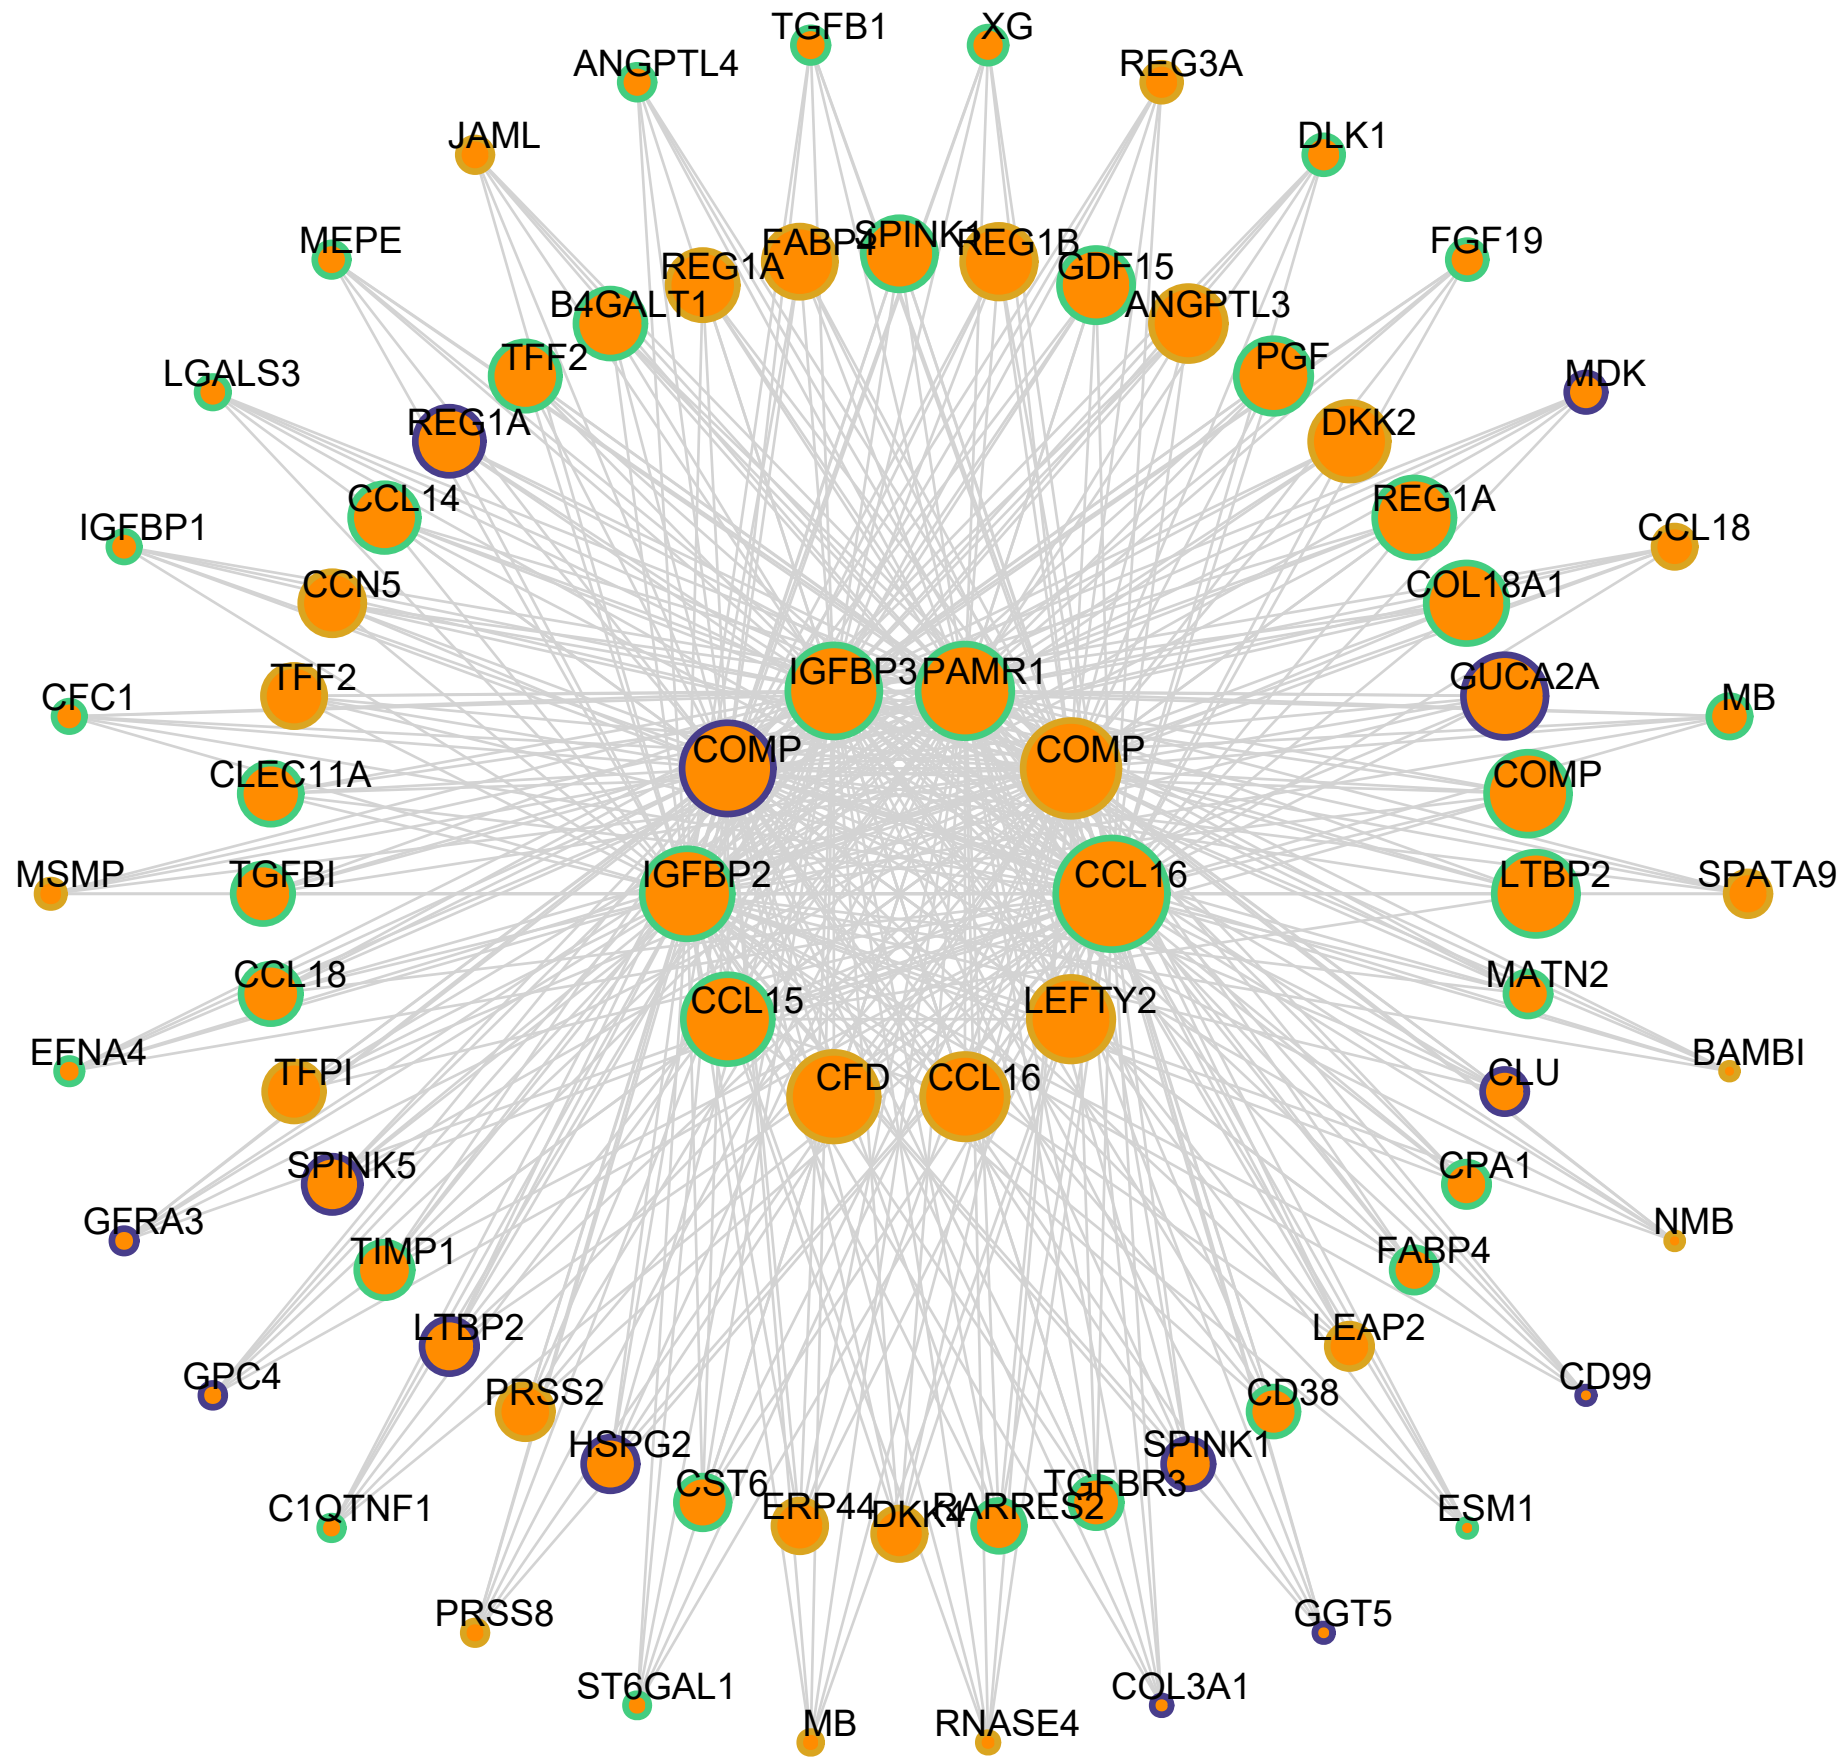

# M18 lightgreen module: ECM Organization/Scavenger Receptor

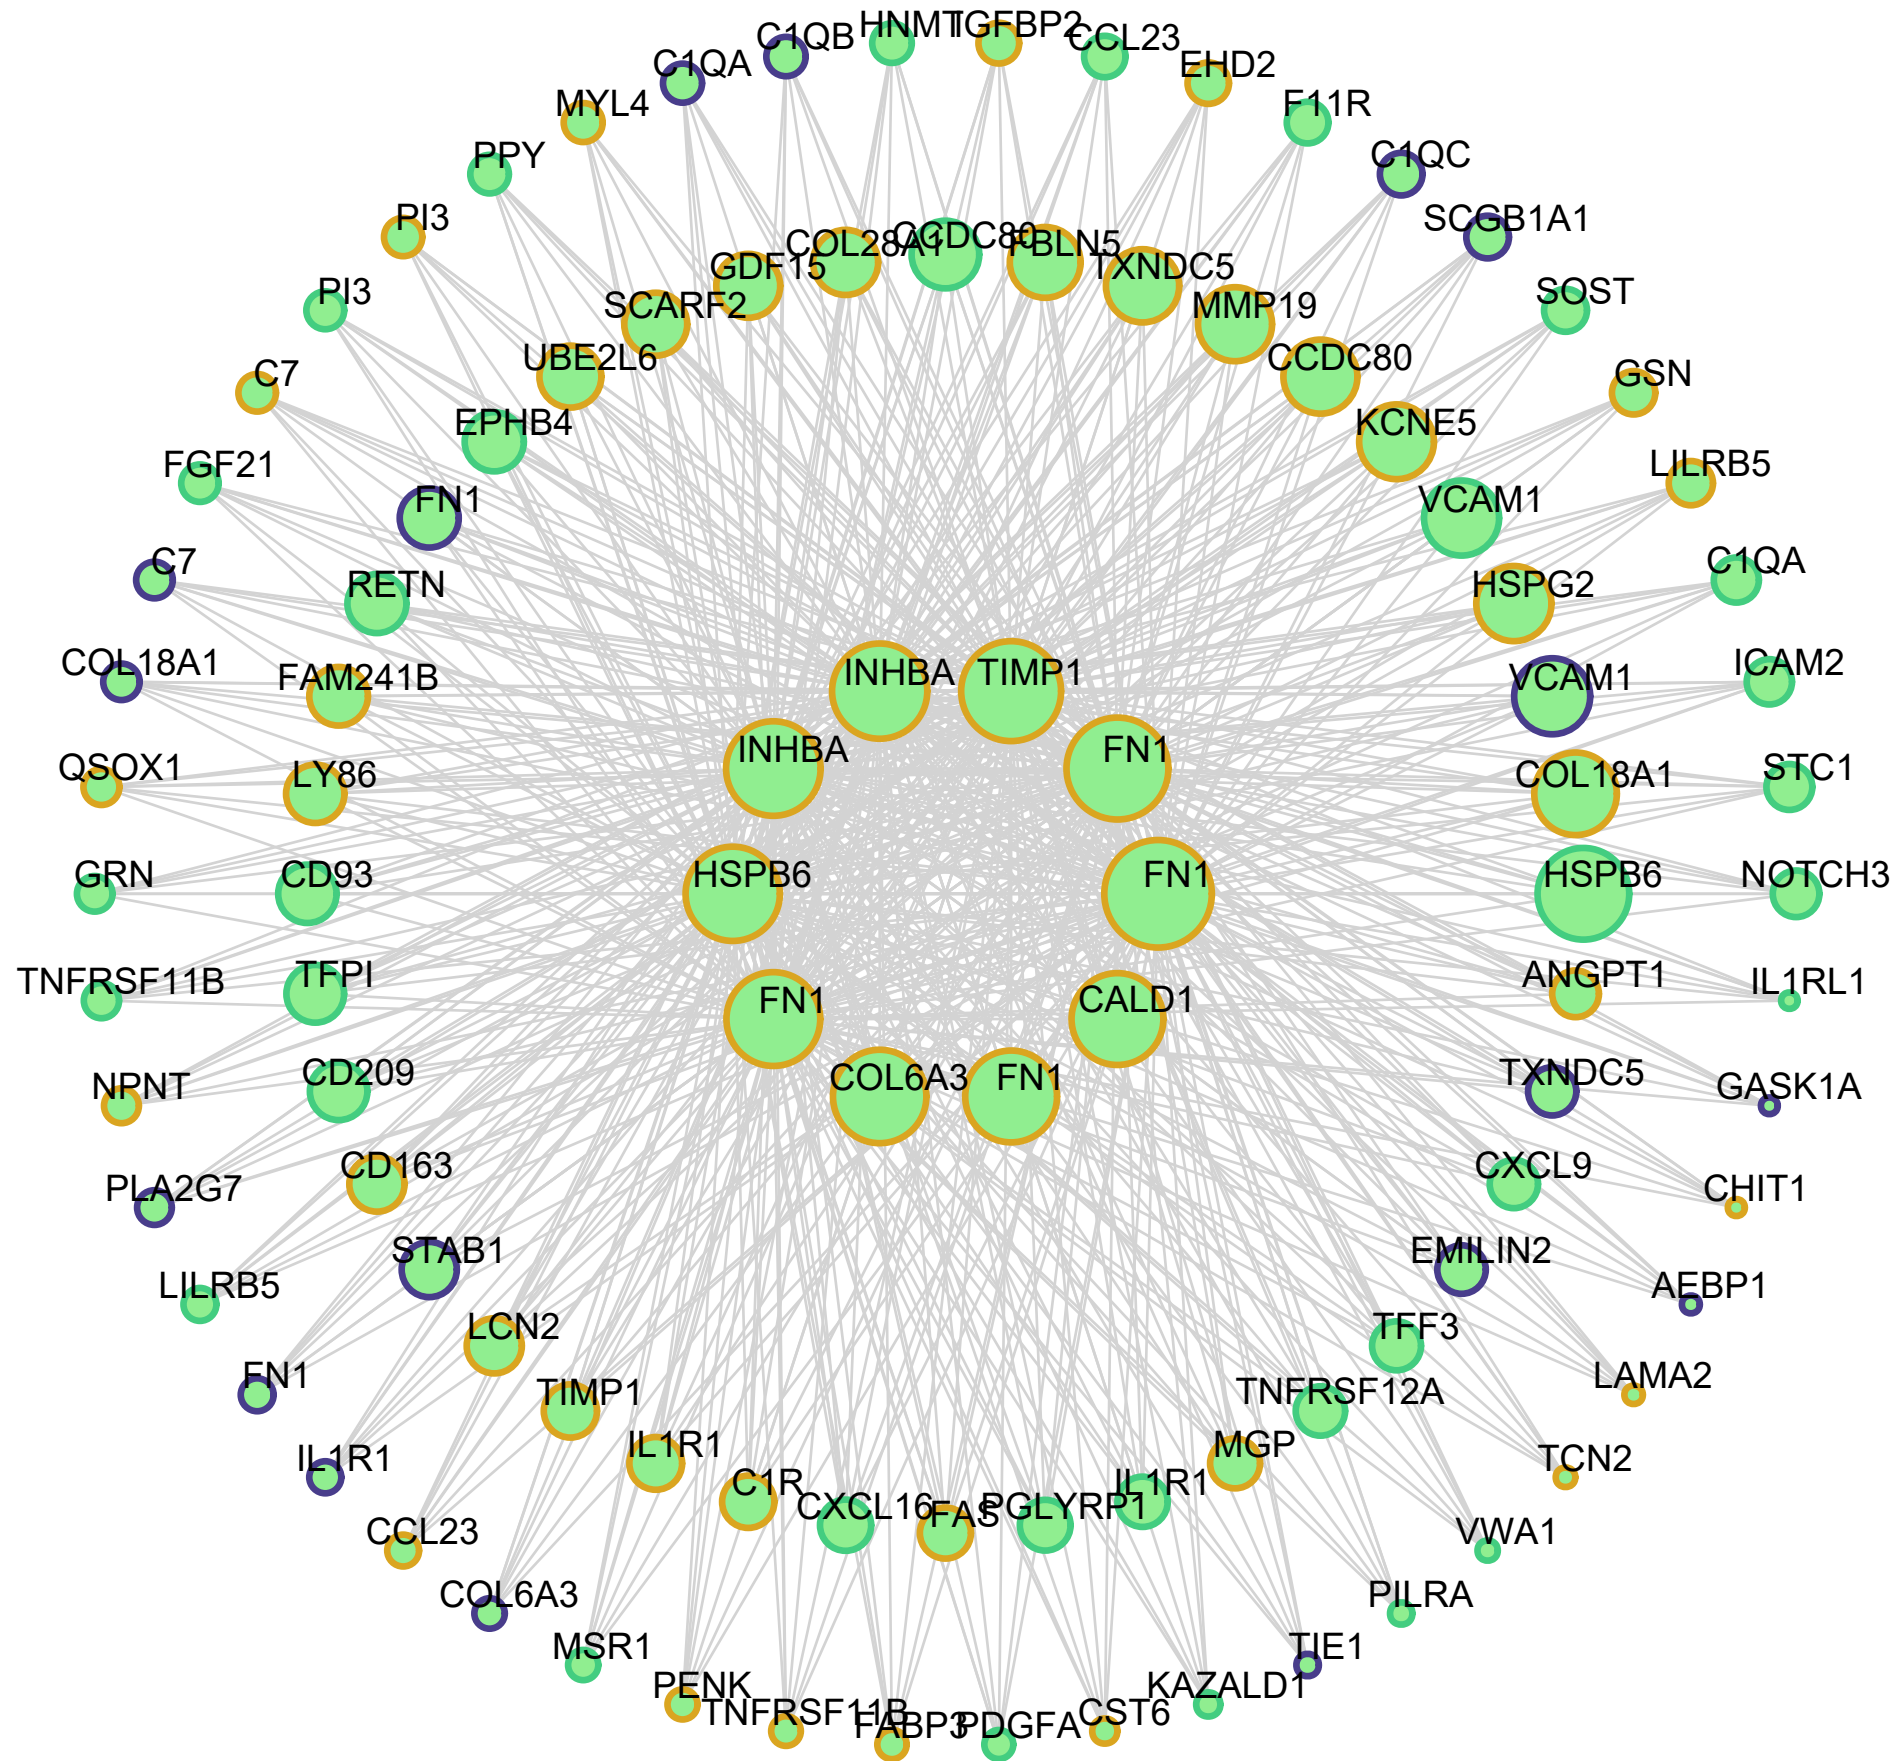

### M3 brown module: Complement/Protein Activation Cascade

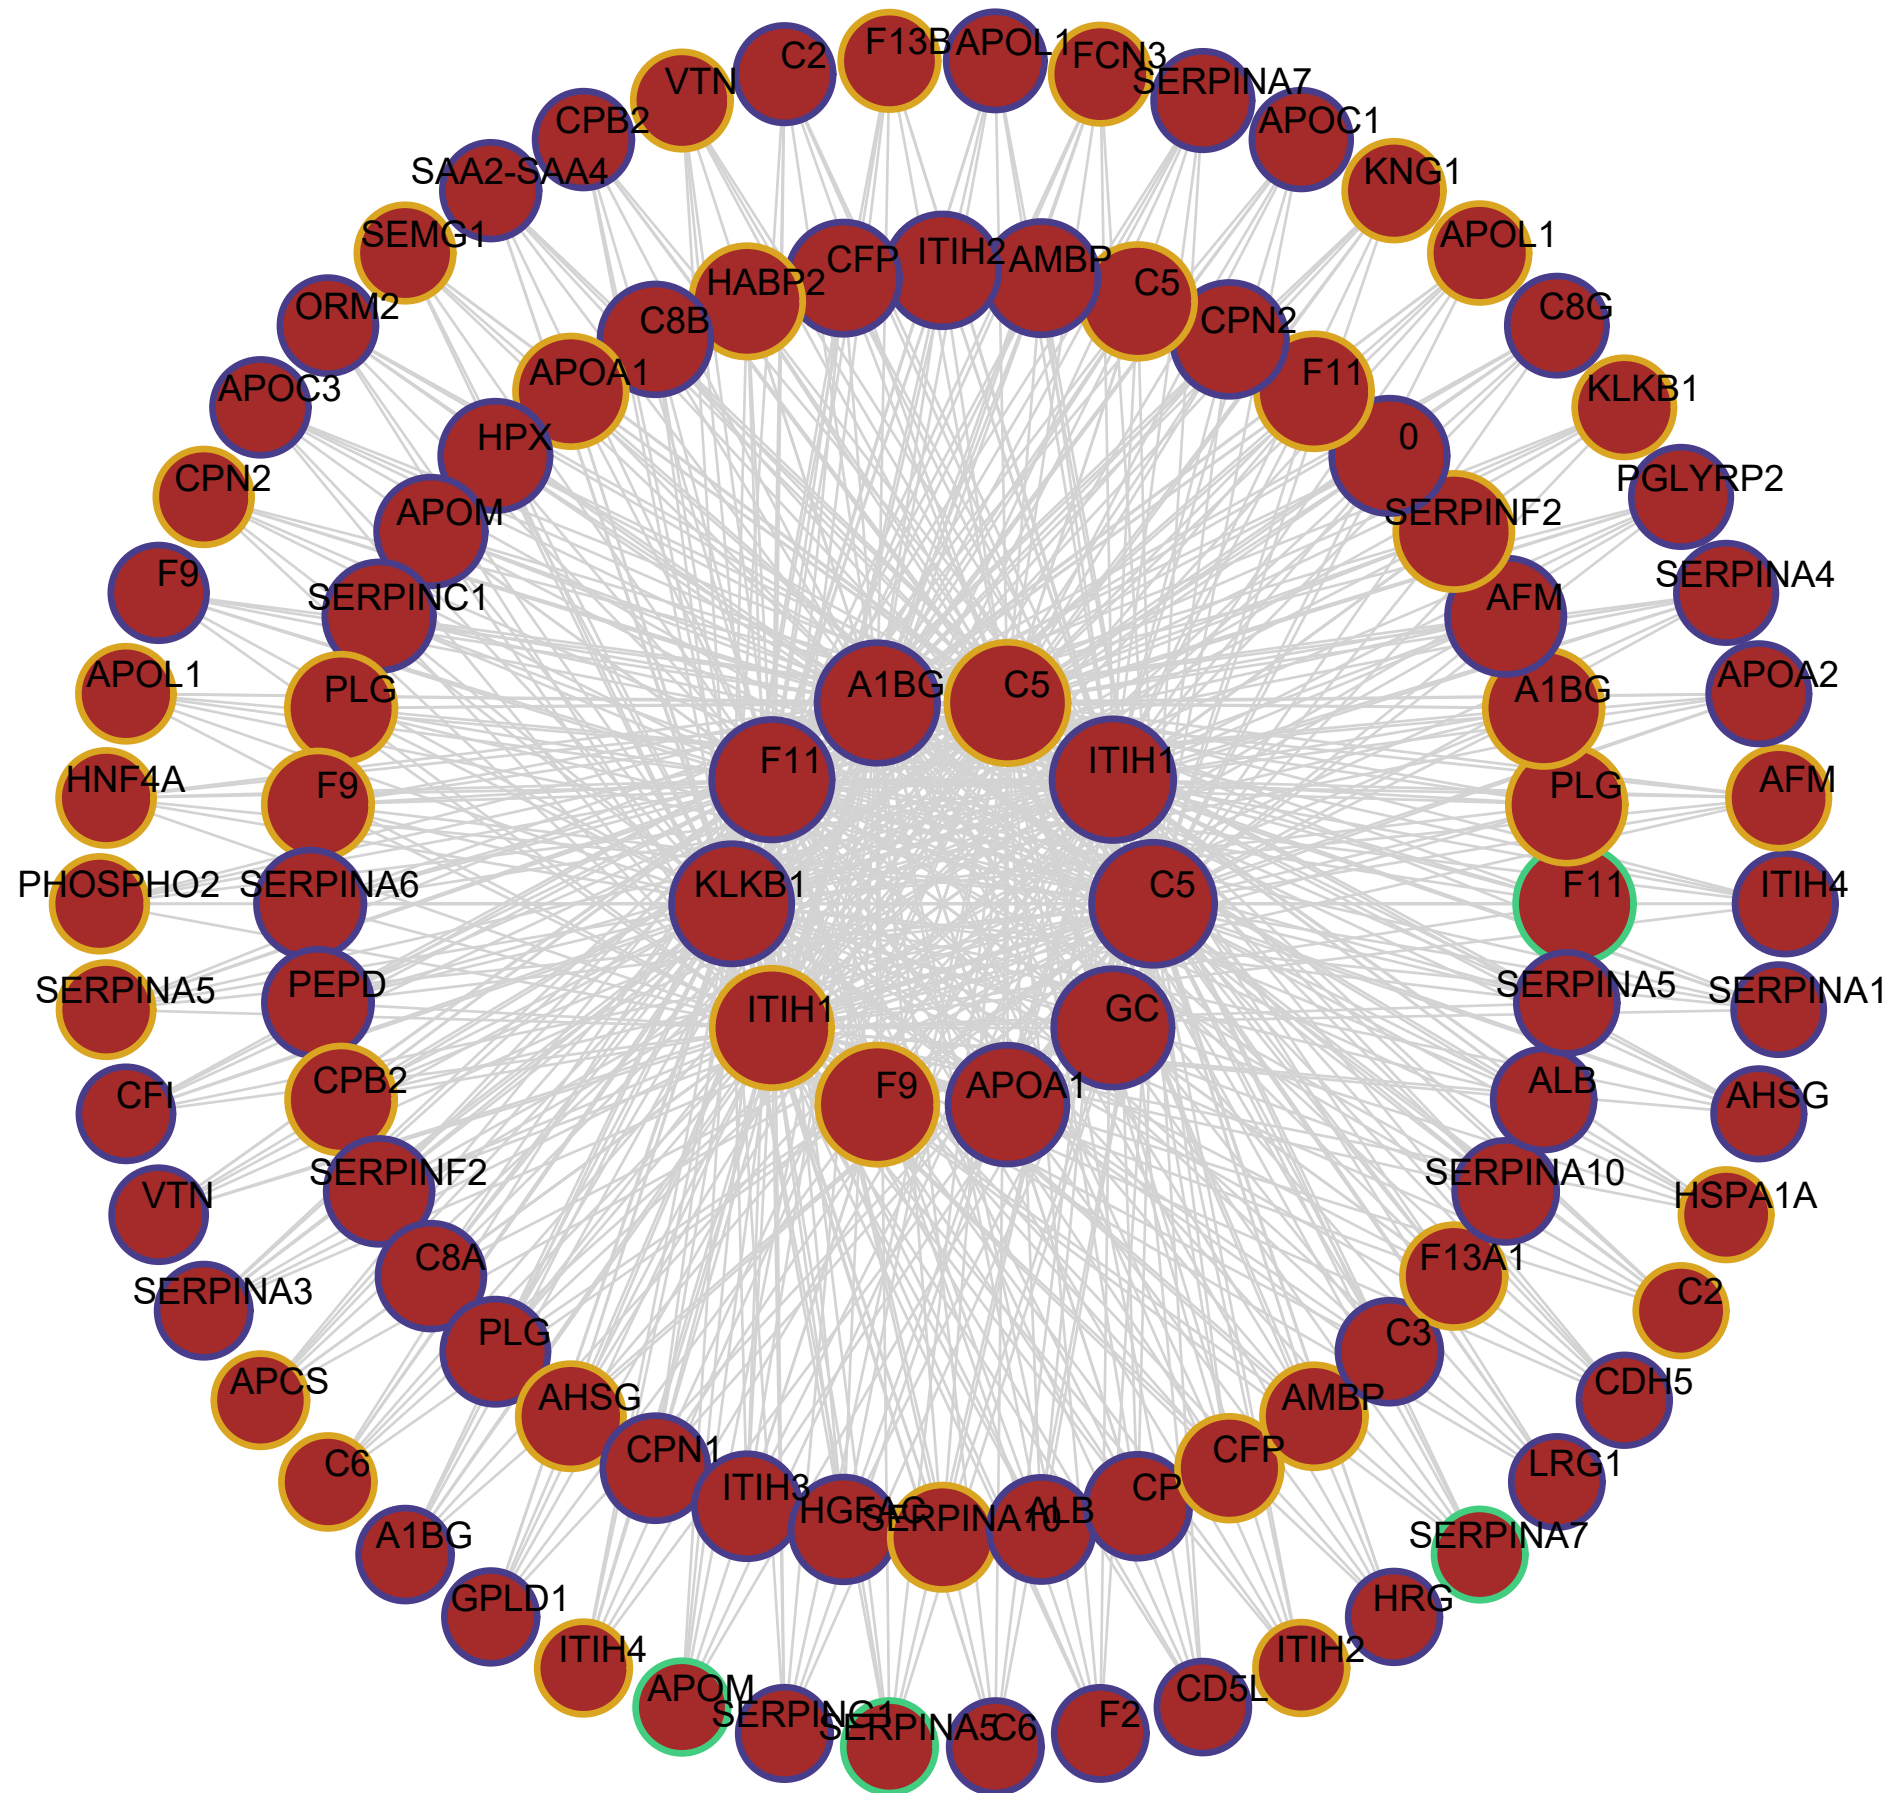





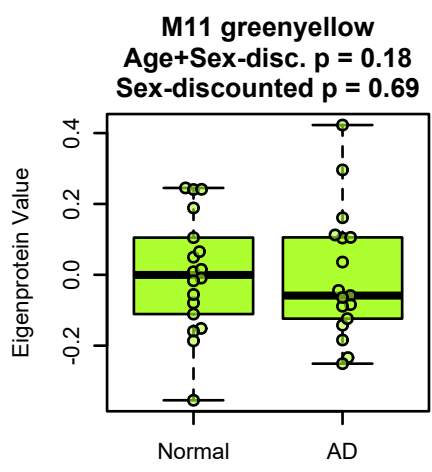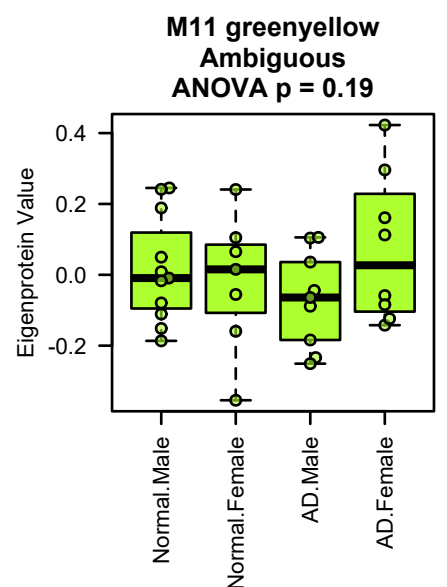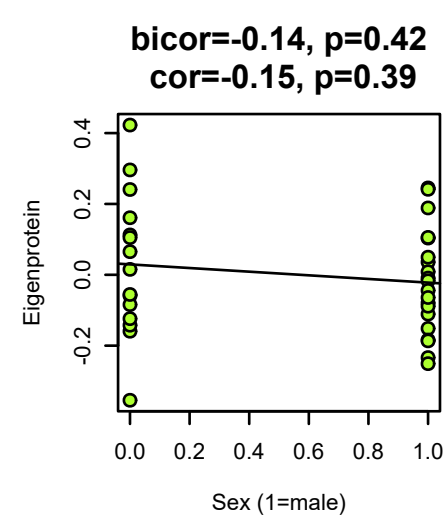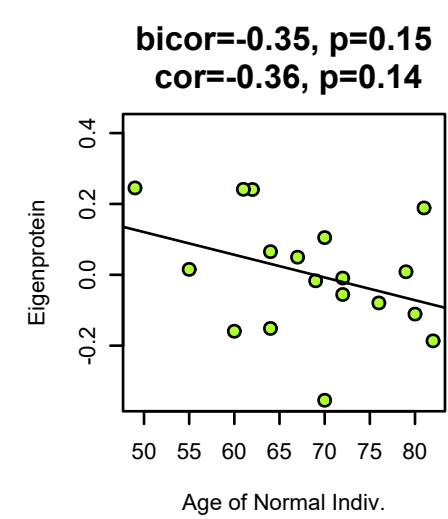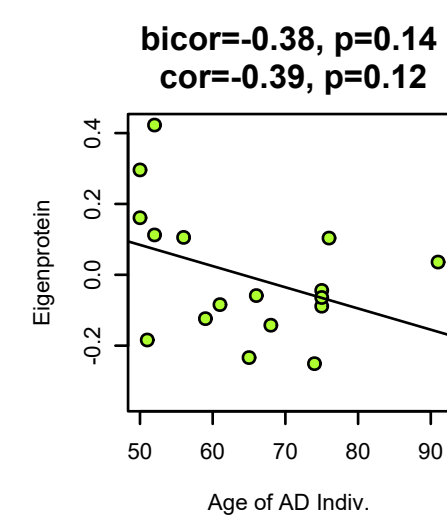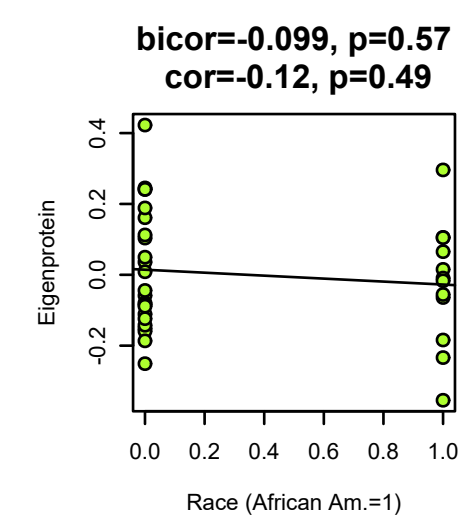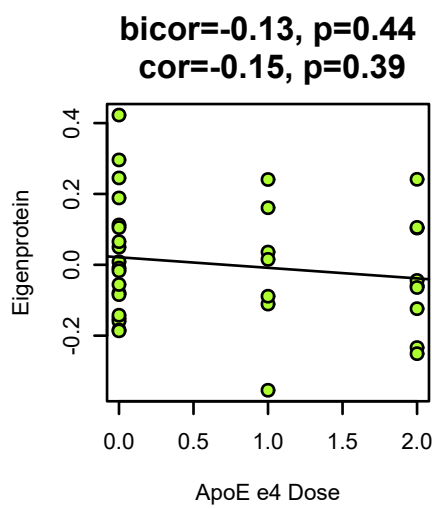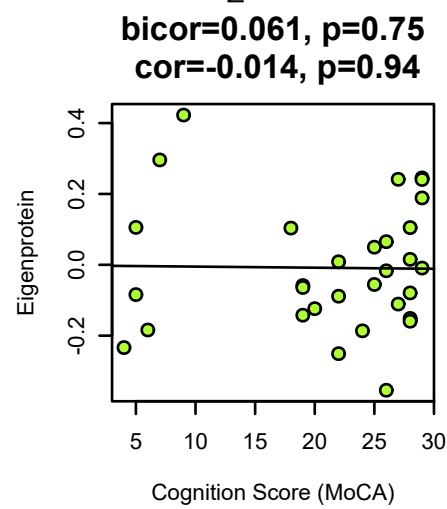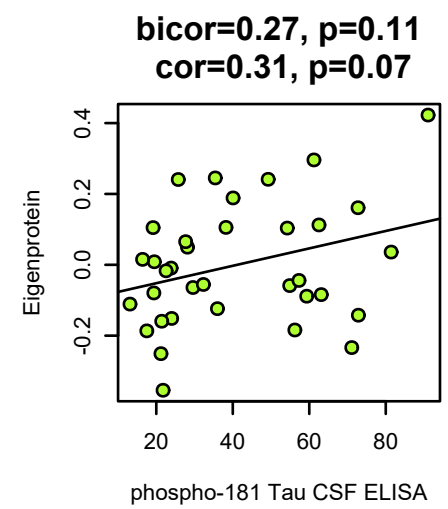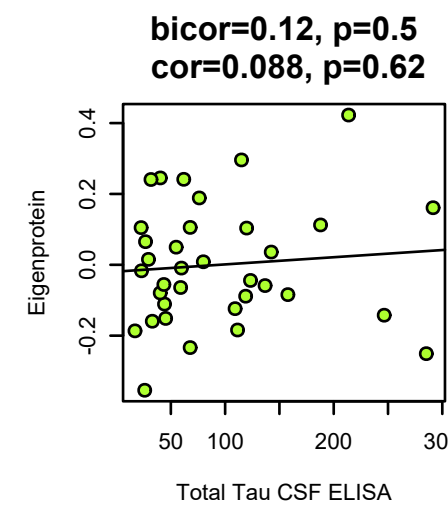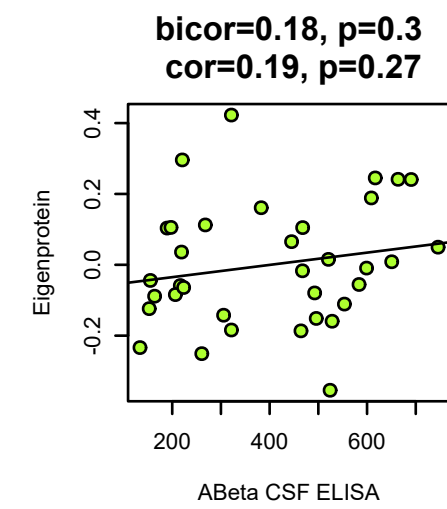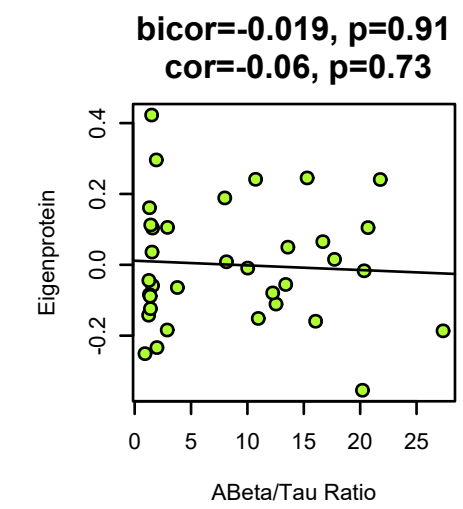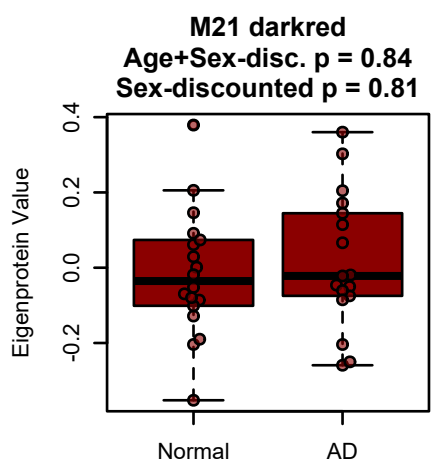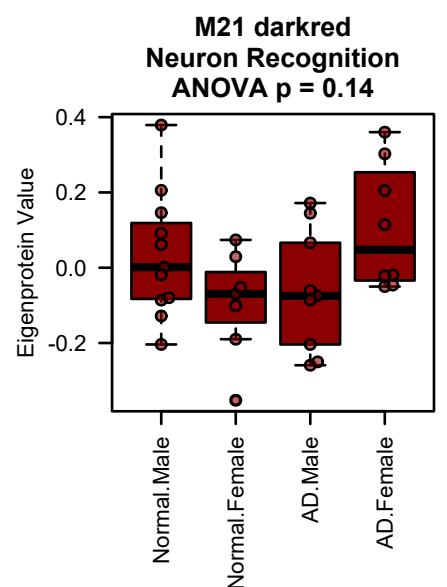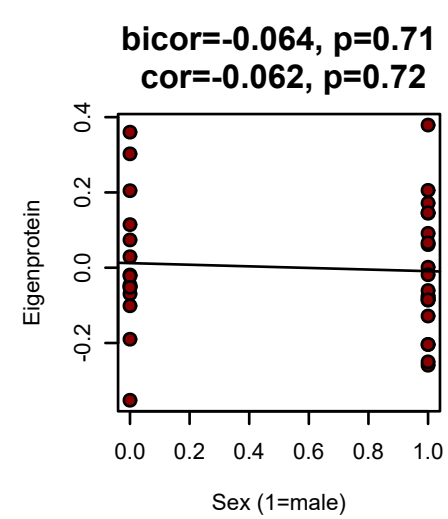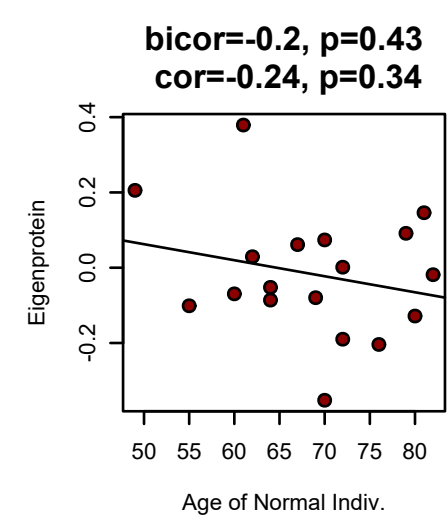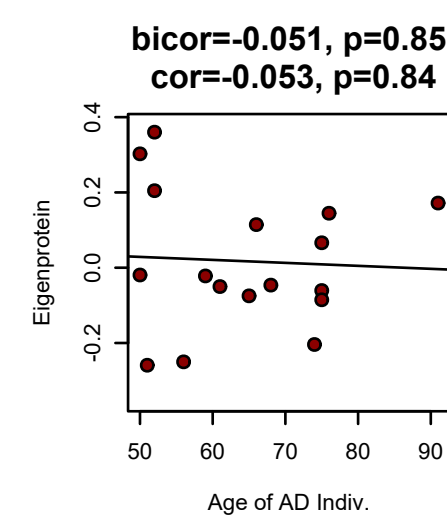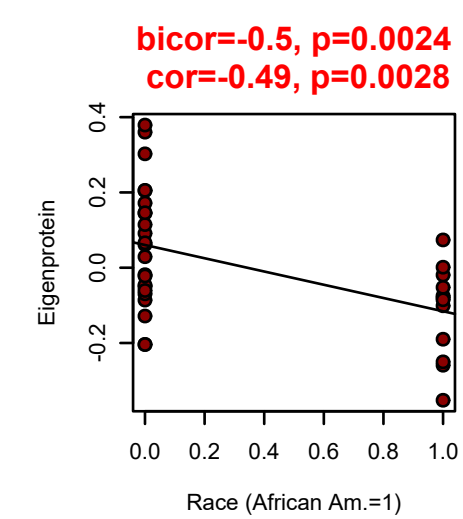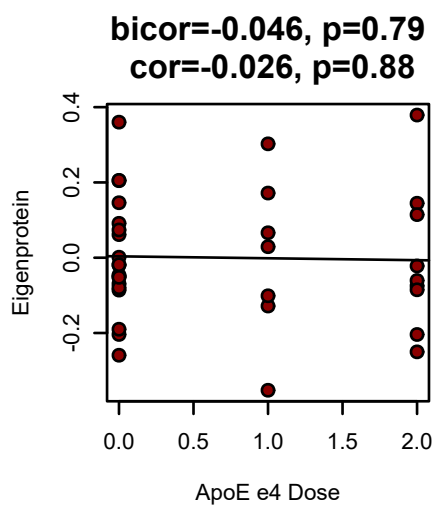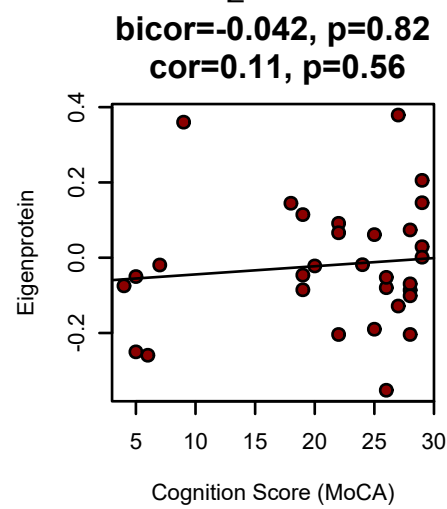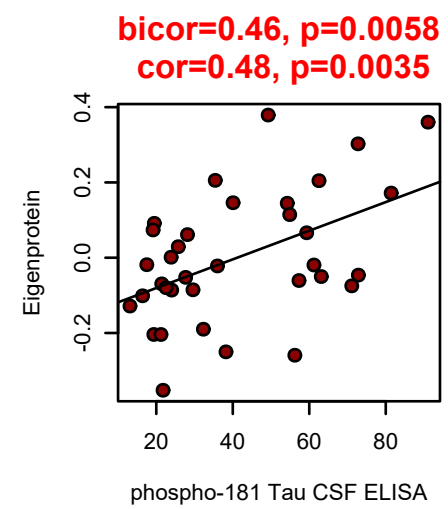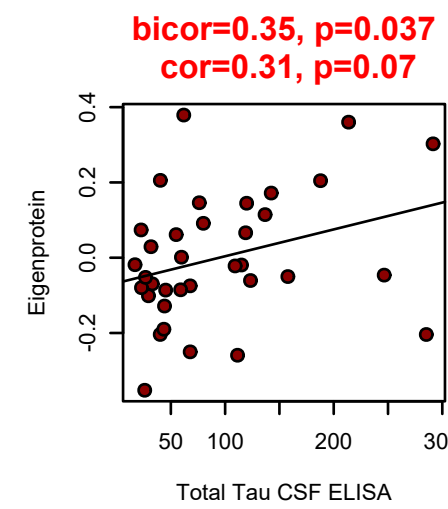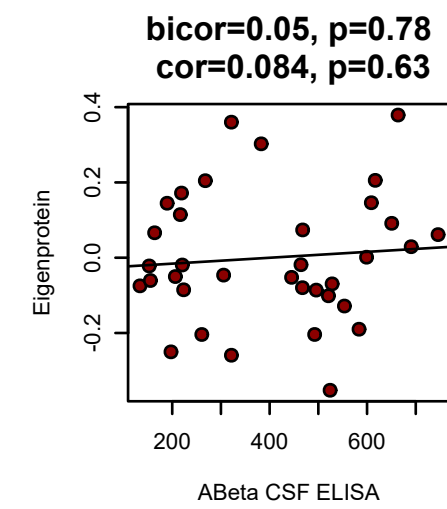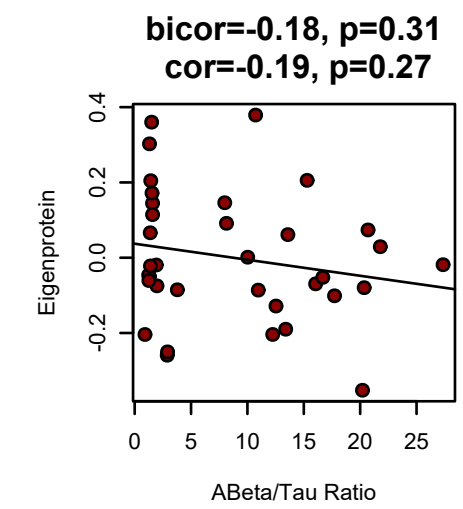

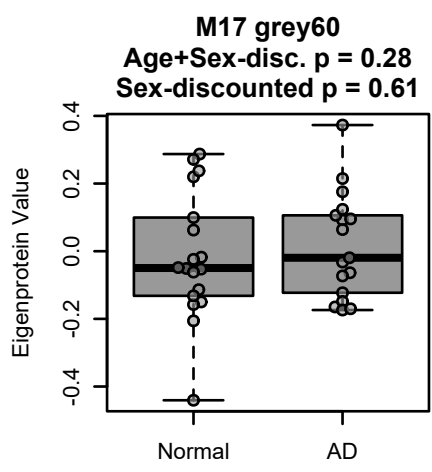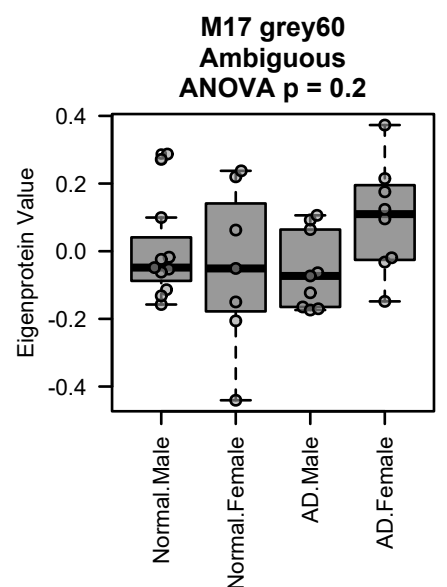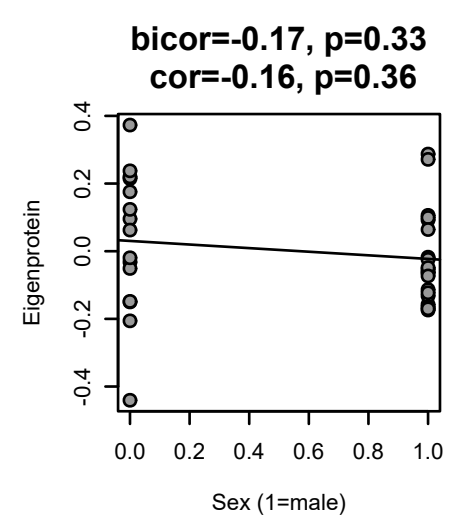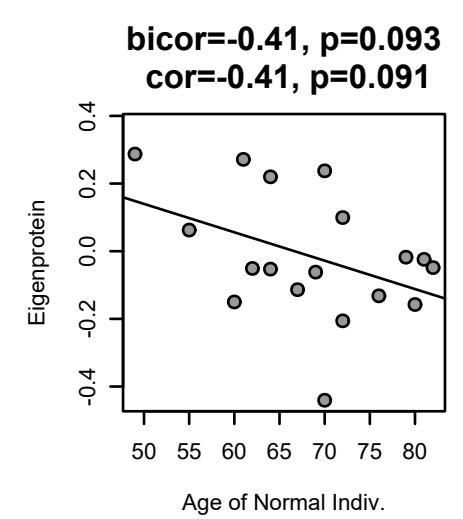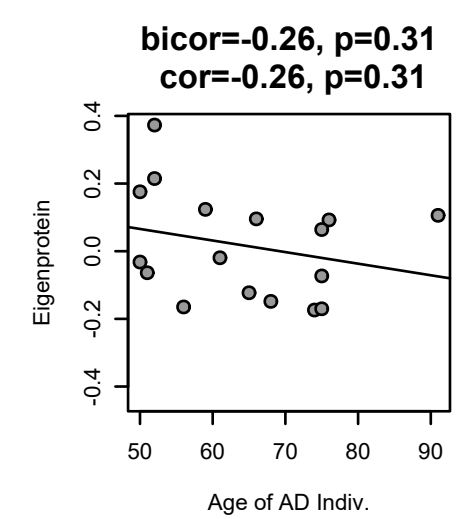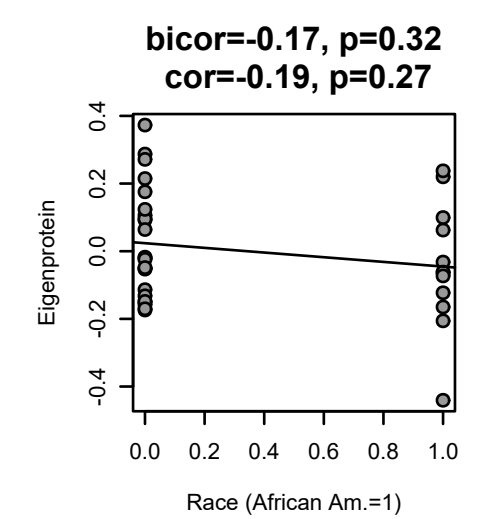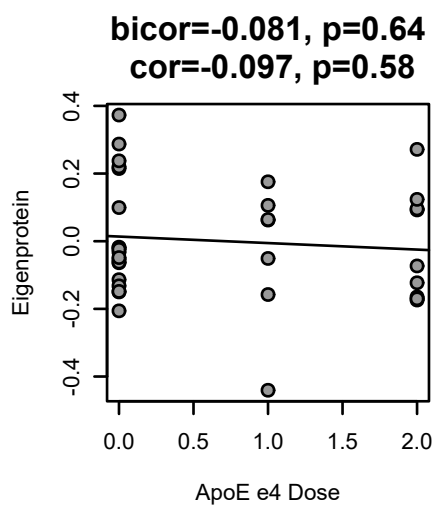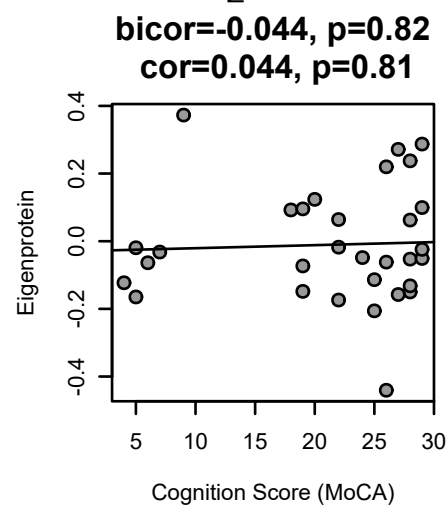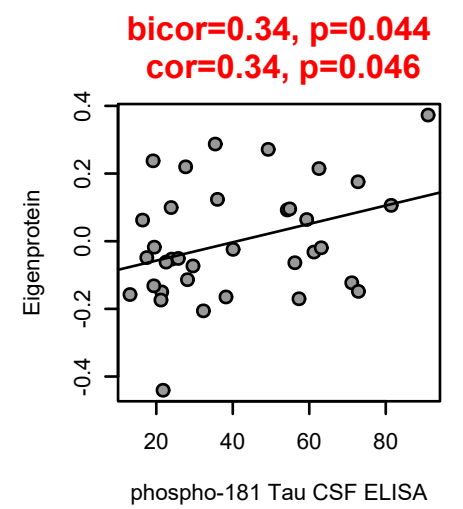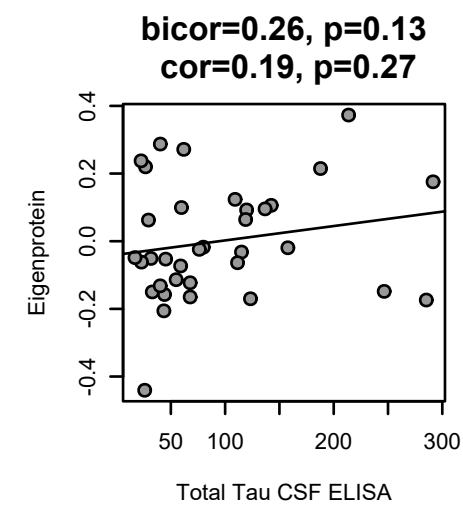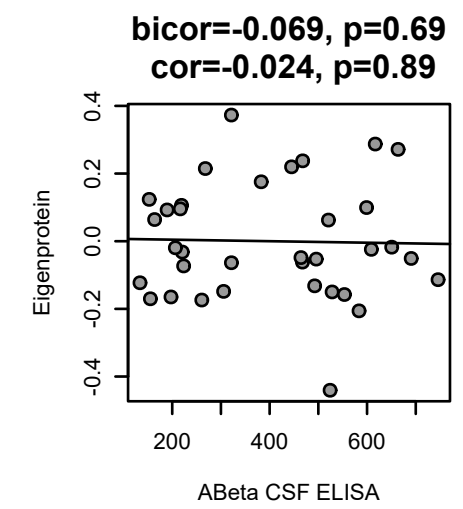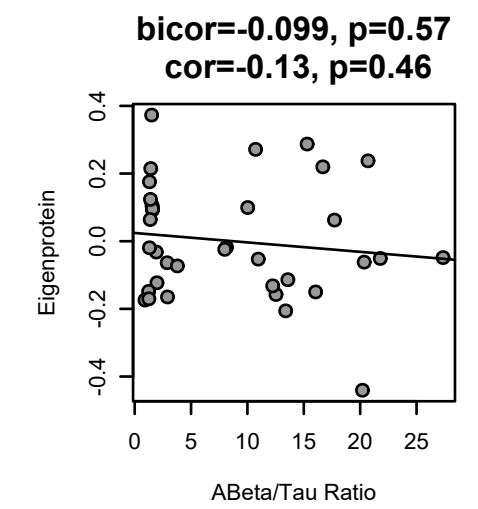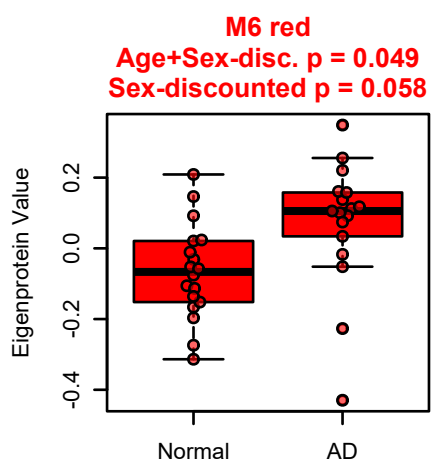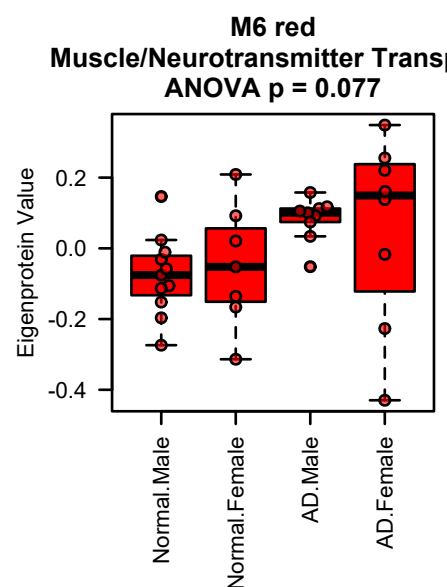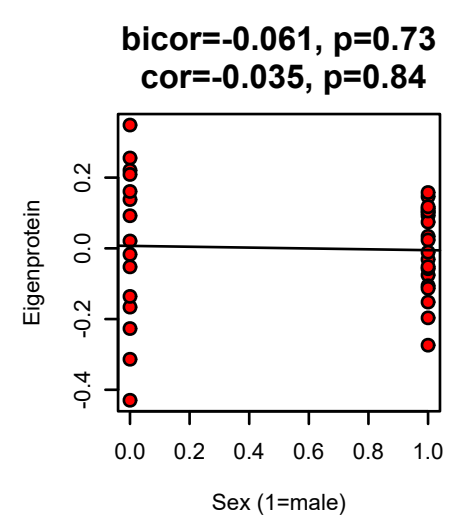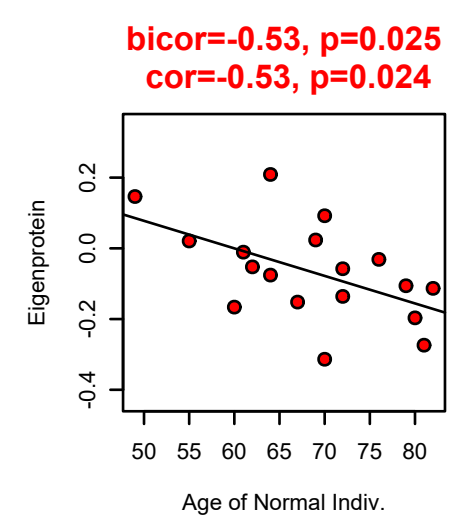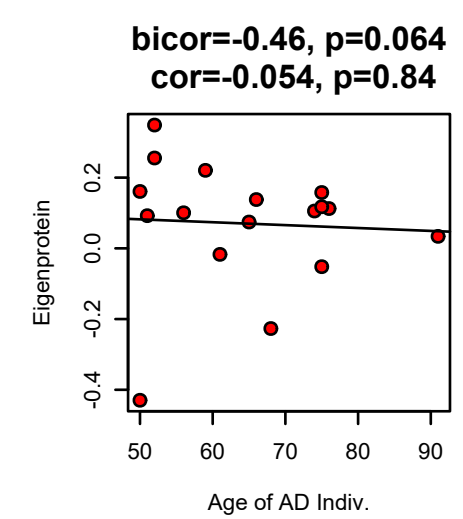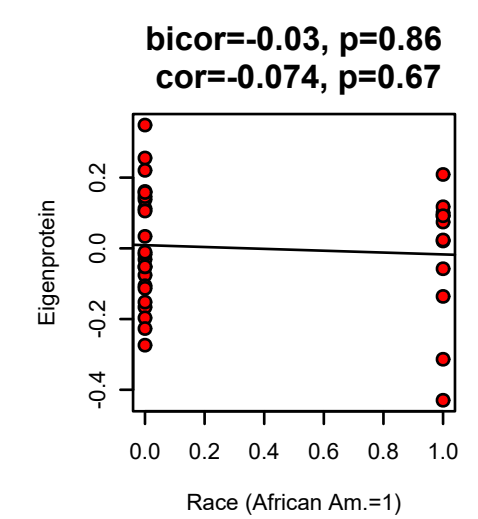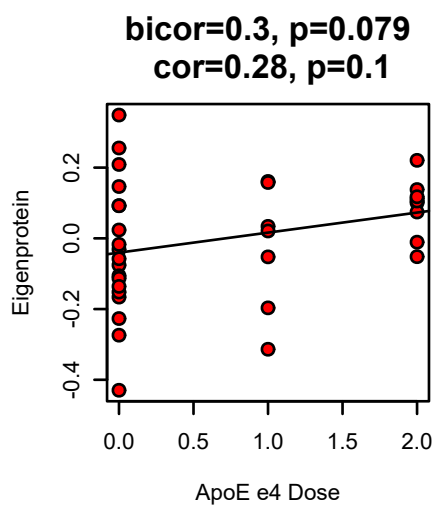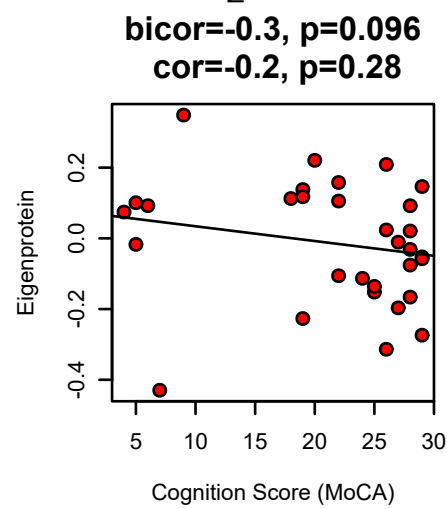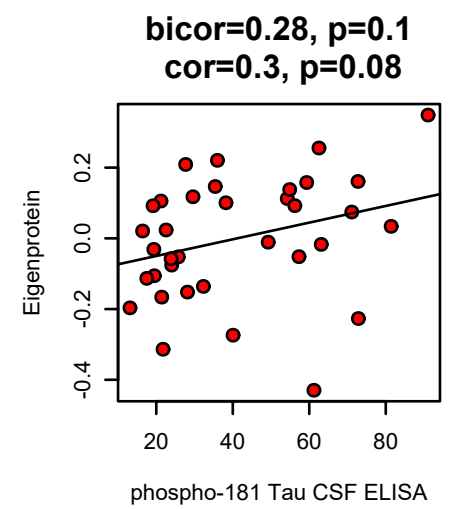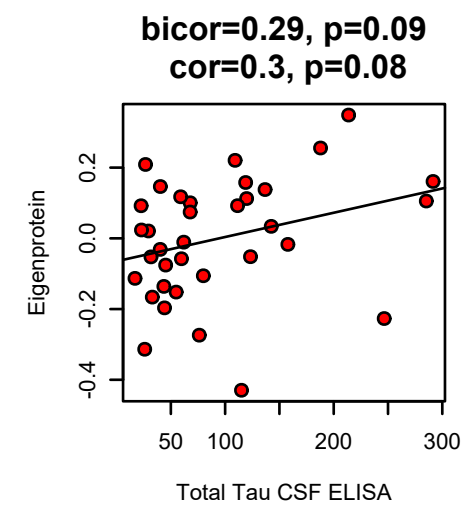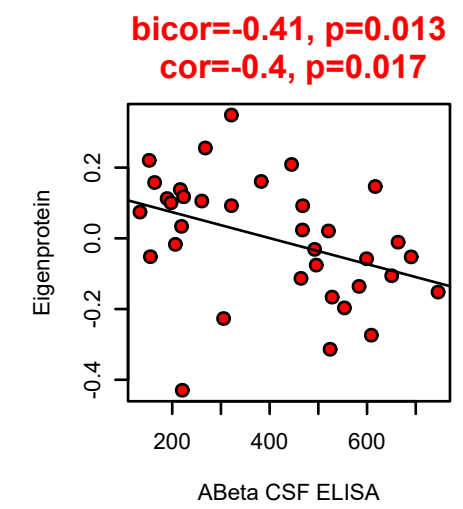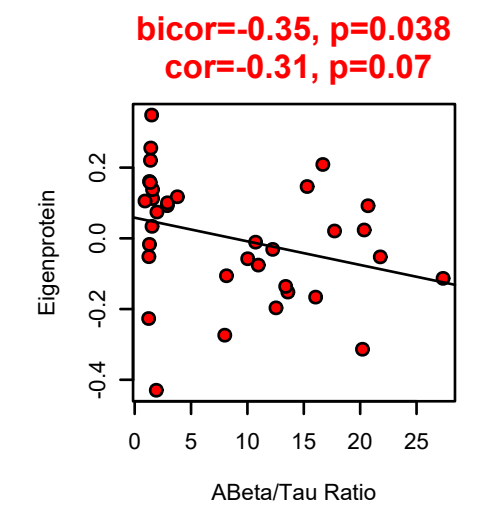

**M15 midnightblue**  
Age+Sex-disc.  $p = 5.6e-08$   
Sex-discounted  $p = 5.5e-07$

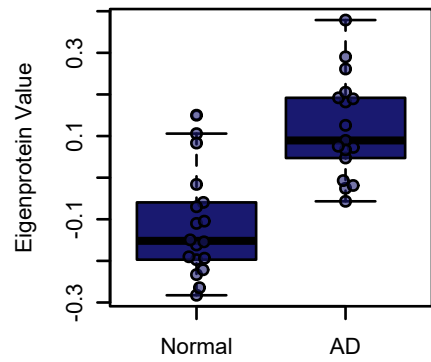

**M15 midnightblue**  
Post-Synaptic Membrane  
ANOVA  $p = 1.4e-07$

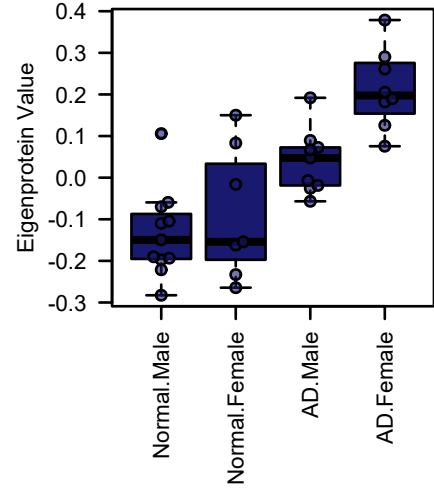

**bicor=-0.37, p=0.027**  
**cor=-0.38, p=0.024**

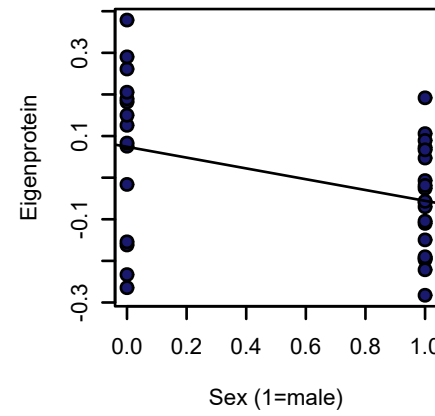

**bicor=-0.44, p=0.071**  
**cor=-0.45, p=0.061**

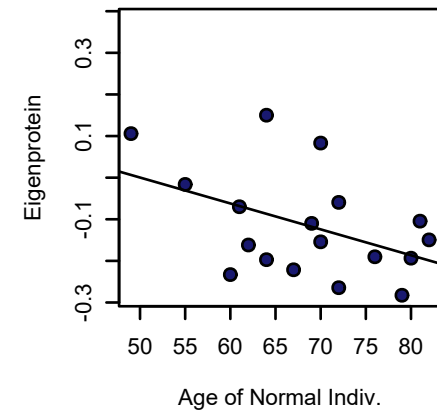

**bicor=-0.72, p=0.001**  
**cor=-0.72, p=0.0011**

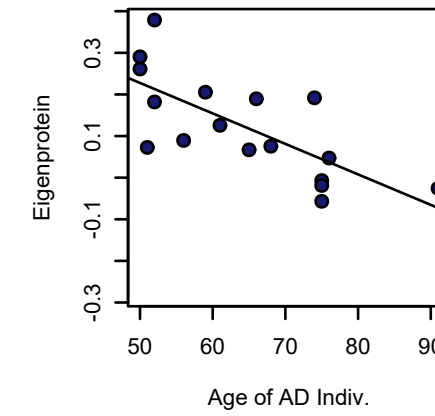

**bicor=0.032, p=0.85**  
**cor=0.022, p=0.9**

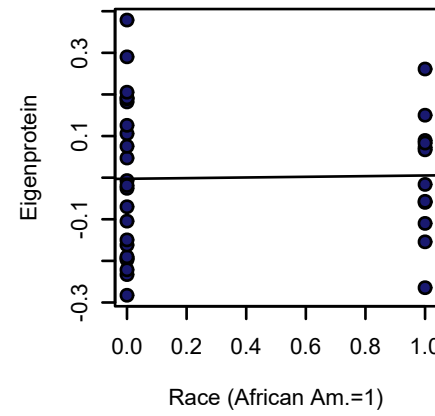

**bicor=0.21, p=0.22**  
**cor=0.2, p=0.25**

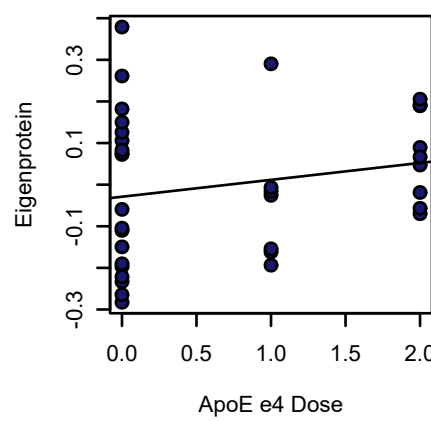

**bicor=-0.56, p=0.00099**  
**cor=-0.58, p=0.00063**

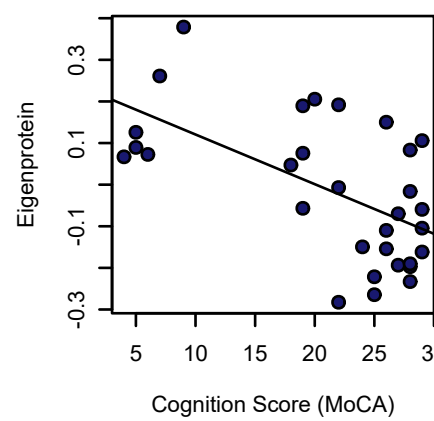

**bicor=0.62, p=7.6e-05**  
**cor=0.63, p=5e-05**

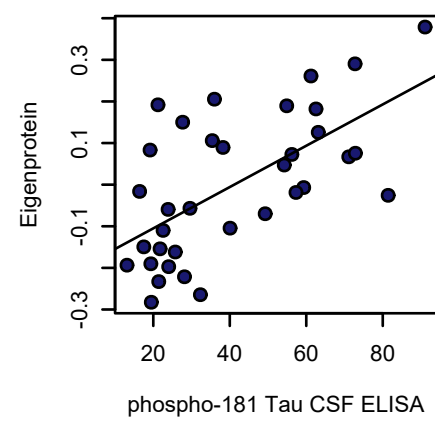

**bicor=0.66, p=1.9e-05**  
**cor=0.66, p=1.6e-05**

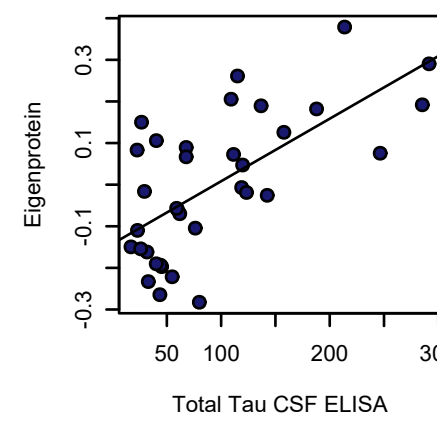

**bicor=-0.64, p=2.9e-05**  
**cor=-0.63, p=5e-05**

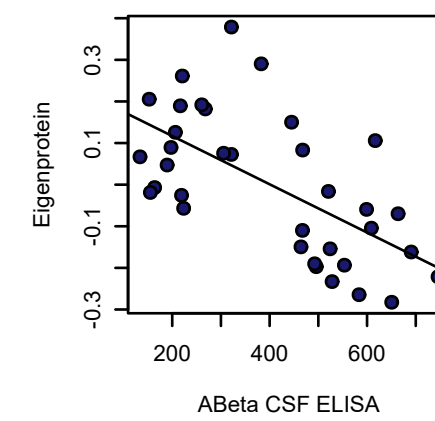

**bicor=-0.58, p=0.00027**  
**cor=-0.57, p=0.00035**

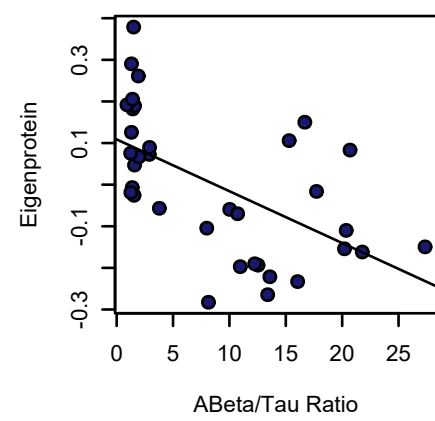

**M8 pink**  
Age+Sex-disc.  $p = 2e-06$   
Sex-discounted  $p = 3.6e-07$

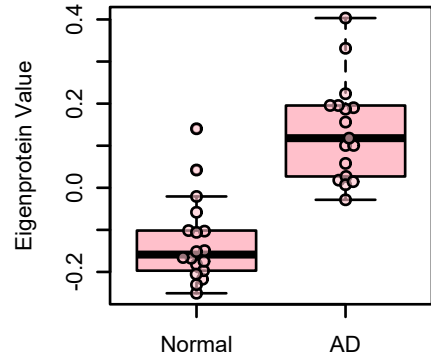

**M8 pink**  
Autophagy  
ANOVA  $p = 3.1e-07$

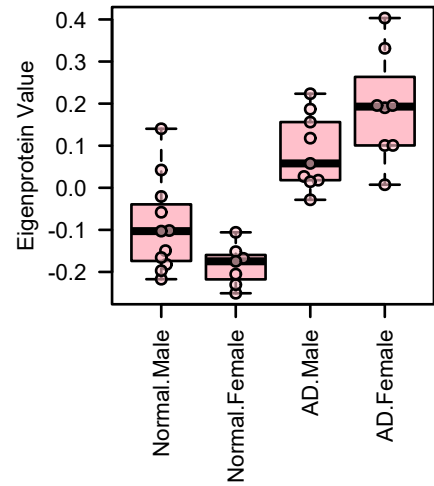

**bicor=-0.072, p=0.68**  
**cor=-0.082, p=0.64**

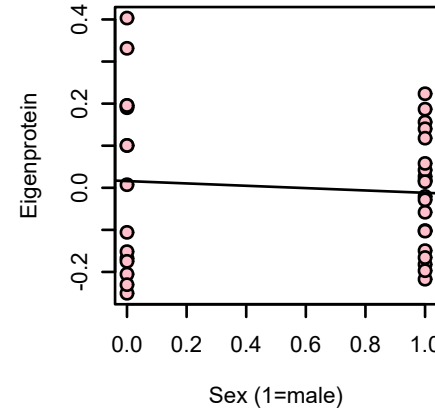

**bicor=0.02, p=0.94**  
**cor=-0.0046, p=0.99**

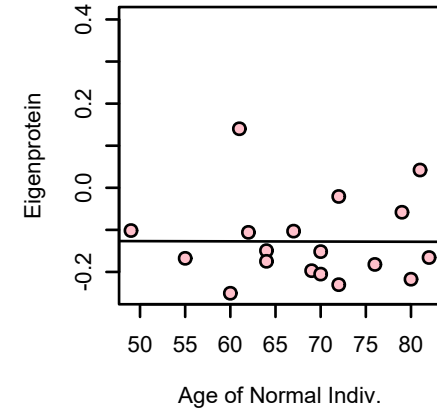

**bicor=-0.067, p=0.8**  
**cor=-0.11, p=0.67**

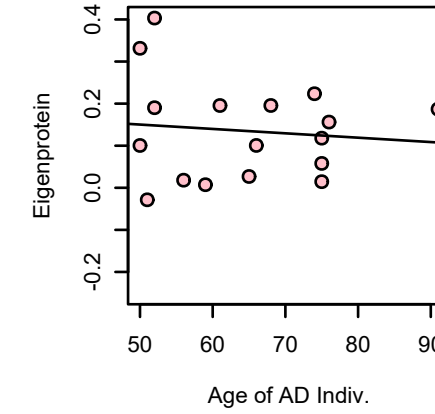

**bicor=-0.36, p=0.033**  
**cor=-0.36, p=0.034**

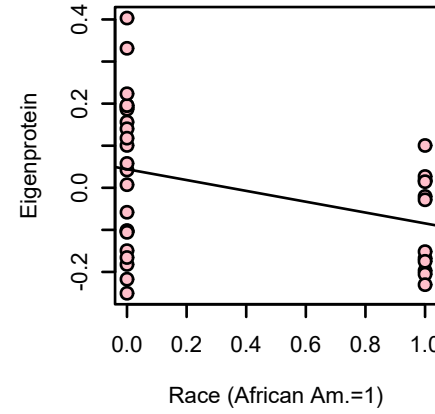

**bicor=0.32, p=0.058**  
**cor=0.31, p=0.07**

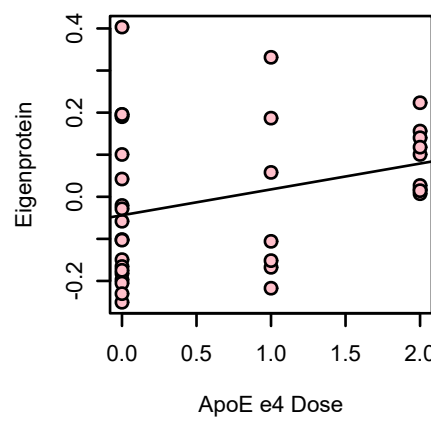

**bicor=-0.67, p=4.2e-05**  
**cor=-0.58, p=0.00063**

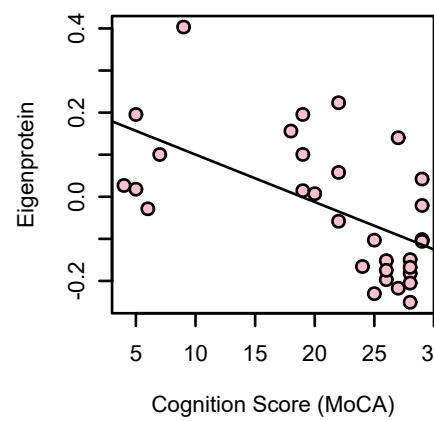

**bicor=0.78, p=2.5e-08**  
**cor=0.82, p=1.7e-09**

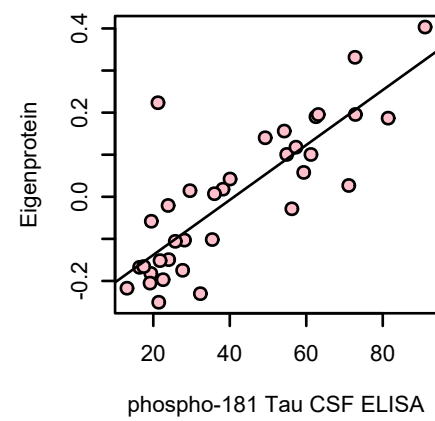

**bicor=0.86, p=4.1e-11**  
**cor=0.87, p=1.2e-11**

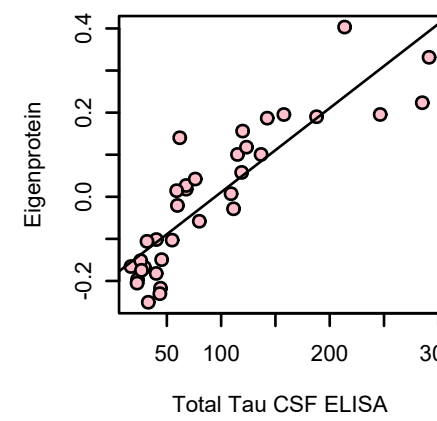

**bicor=-0.54, p=0.00072**  
**cor=-0.55, p=0.00062**

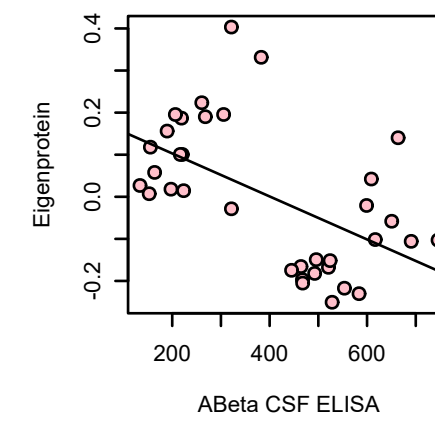

**bicor=-0.82, p=1.4e-09**  
**cor=-0.79, p=1.7e-08**

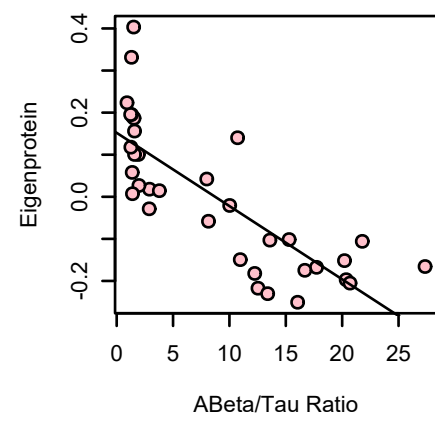

**M19 lightyellow**  
Age+Sex-disc.  $p = 0.18$   
Sex-discounted  $p = 0.1$

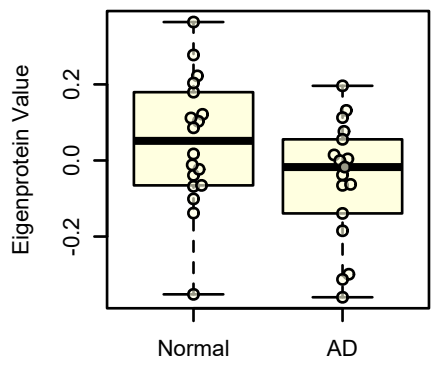

**M19 lightyellow**  
Synapse Organization  
ANOVA  $p = 0.18$

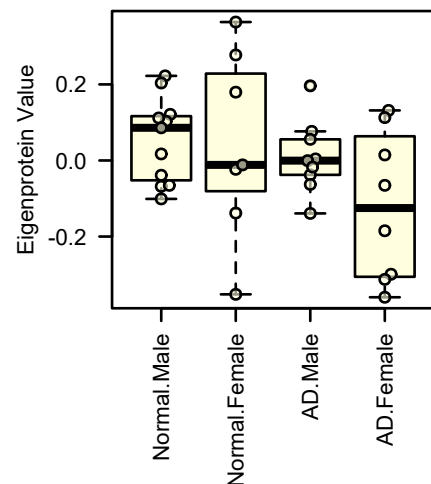

**bicor=0.23, p=0.19**  
**cor=0.23, p=0.18**

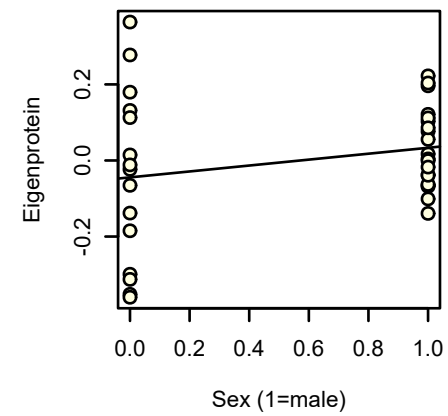

**bicor=-0.28, p=0.26**  
**cor=-0.23, p=0.36**

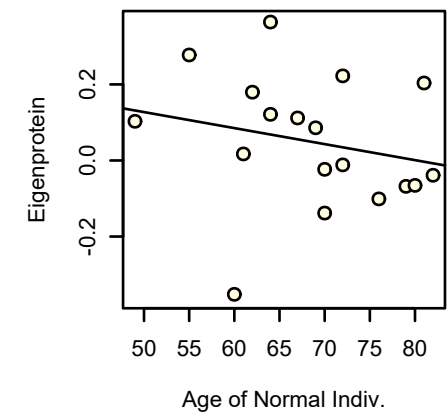

**bicor=0.18, p=0.5**  
**cor=0.18, p=0.49**

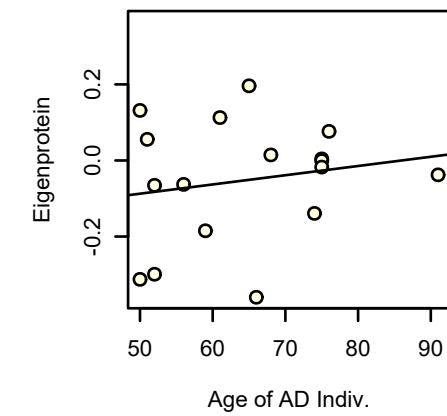

**bicor=0.37, p=0.03**  
**cor=0.38, p=0.024**

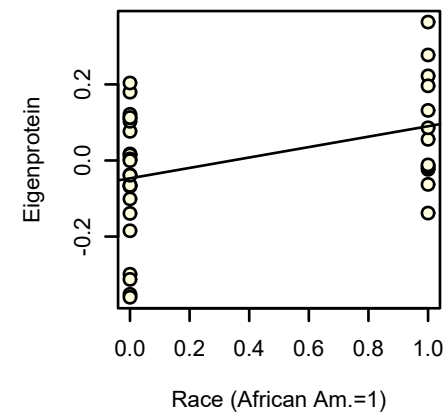

**bicor=-0.19, p=0.27**  
**cor=-0.18, p=0.3**

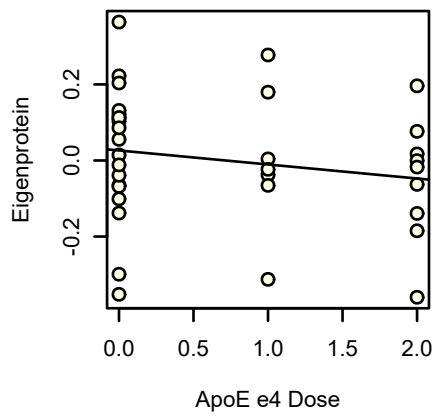

**bicor=0.3, p=0.097**  
**cor=0.084, p=0.65**

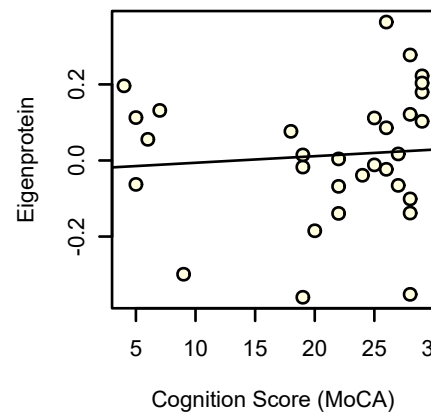

**bicor=-0.11, p=0.51**  
**cor=-0.18, p=0.3**

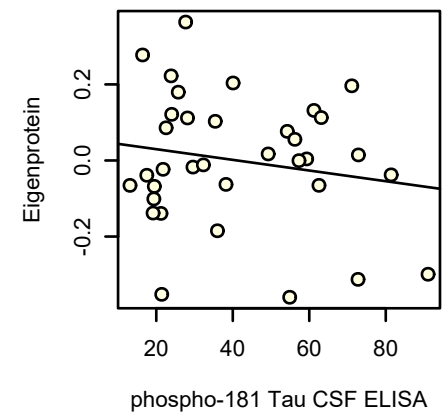

**bicor=-0.33, p=0.051**  
**cor=-0.41, p=0.014**

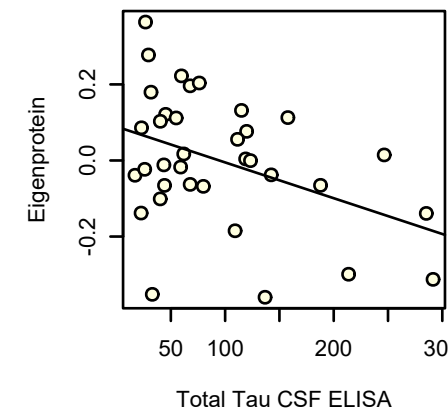

**bicor=0.23, p=0.19**  
**cor=0.23, p=0.18**

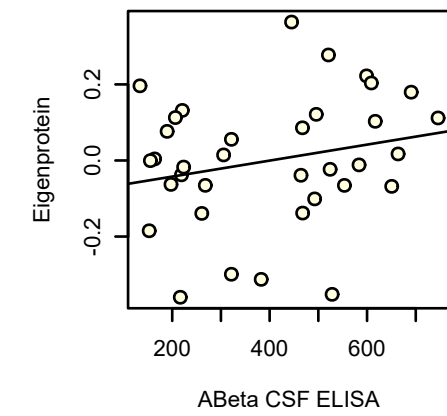

**bicor=0.25, p=0.15**  
**cor=0.24, p=0.16**

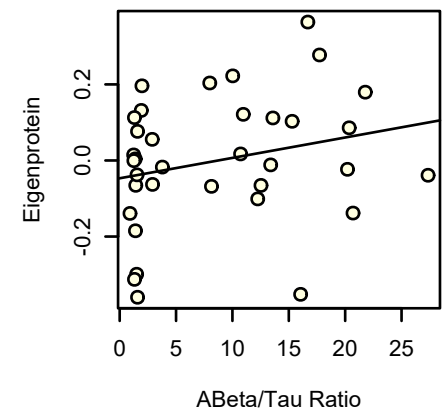

**M38 plum1**  
Age+Sex-disc.  $p = 0.18$   
Sex-discounted  $p = 0.087$

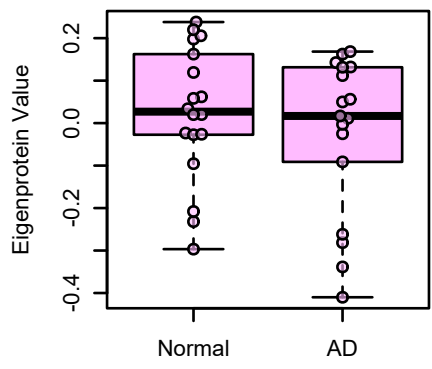

**M38 plum1**  
Ambiguous  
ANOVA  $p = 0.2$

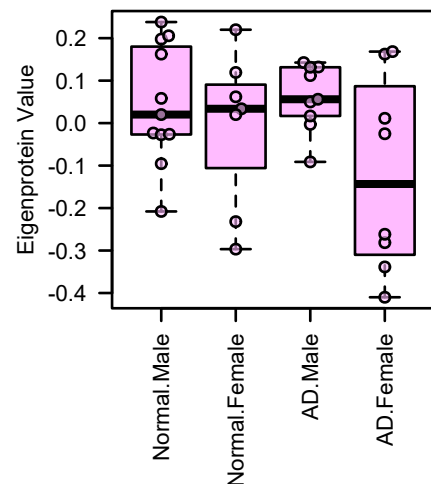

**bicor=0.33, p=0.054**  
**cor=0.36, p=0.034**

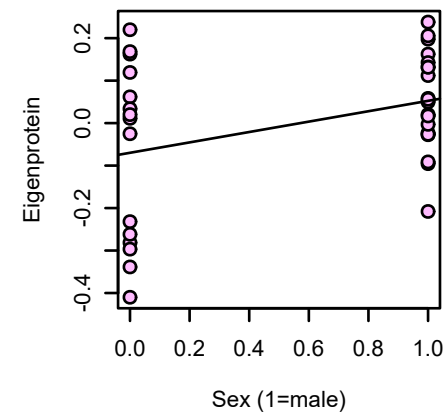

**bicor=-0.14, p=0.59**  
**cor=-0.11, p=0.66**

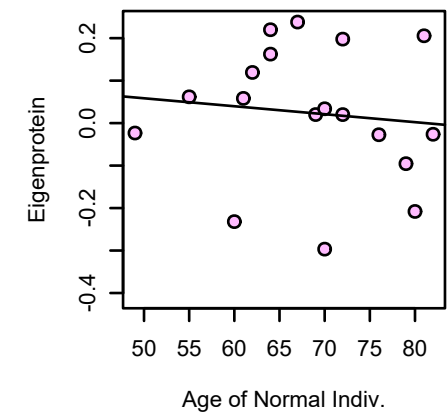

**bicor=0.46, p=0.061**  
**cor=0.45, p=0.07**

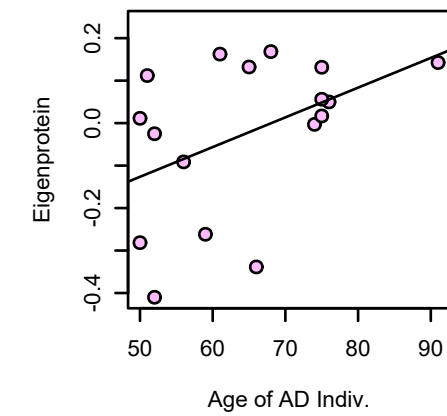

**bicor=0.15, p=0.4**  
**cor=0.16, p=0.36**

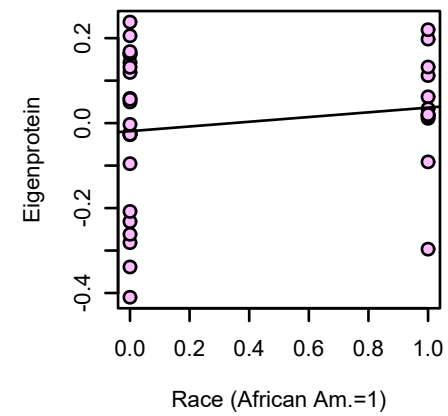

**bicor=-0.16, p=0.35**  
**cor=-0.15, p=0.39**

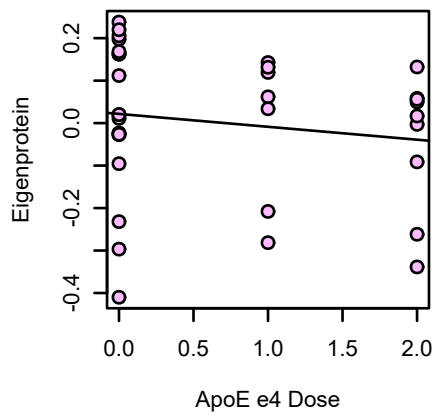

**bicor=0.19, p=0.29**  
**cor=0.075, p=0.69**

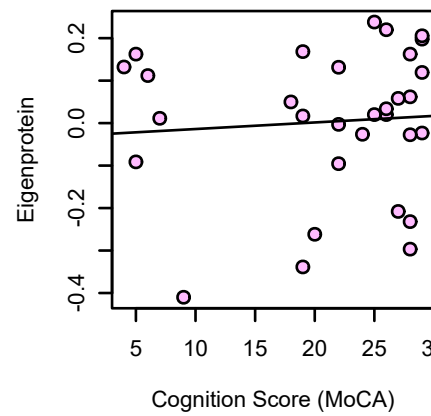

**bicor=0.033, p=0.85**  
**cor=-0.038, p=0.83**

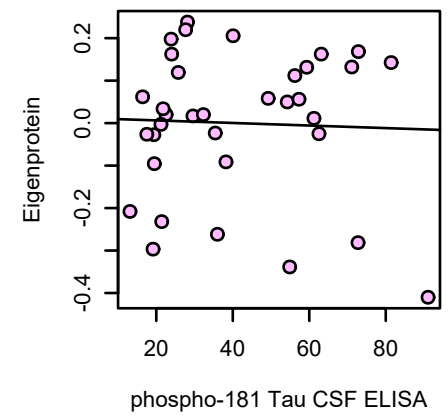

**bicor=-0.12, p=0.48**  
**cor=-0.19, p=0.27**

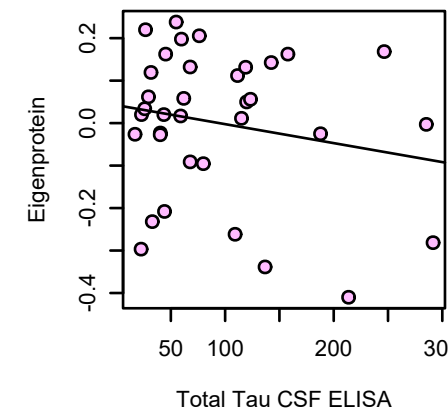

**bicor=0.14, p=0.43**  
**cor=0.14, p=0.42**

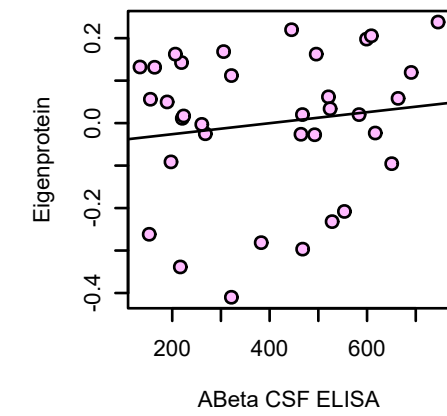

**bicor=0.037, p=0.83**  
**cor=0.061, p=0.73**

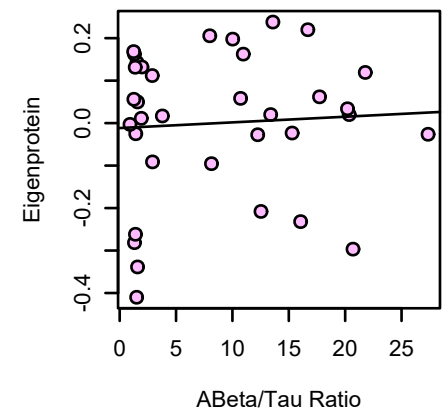

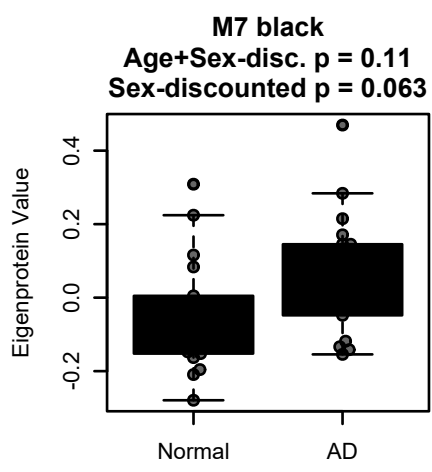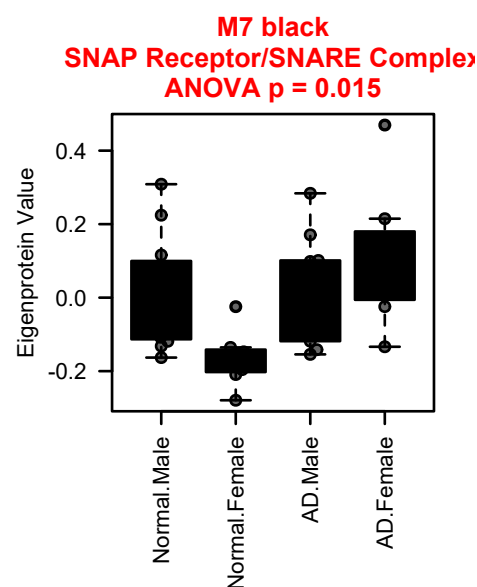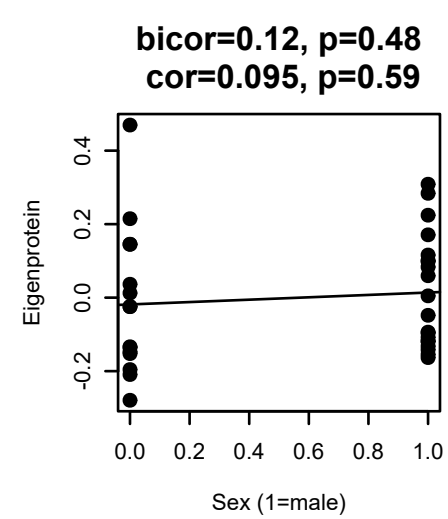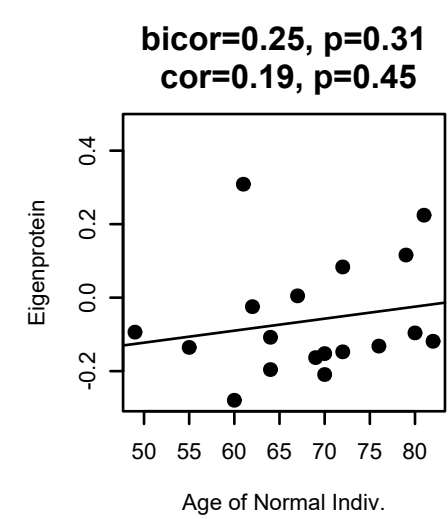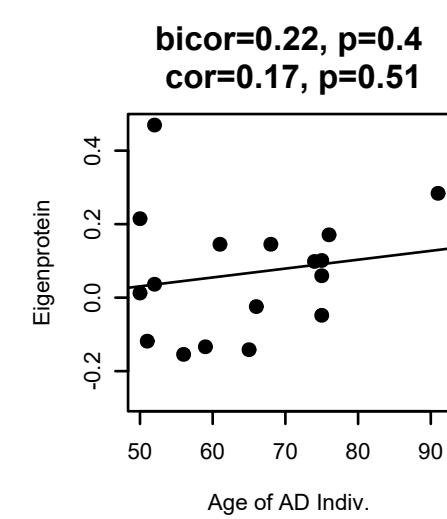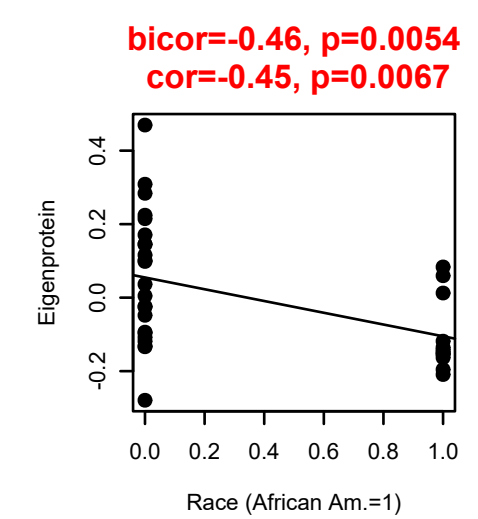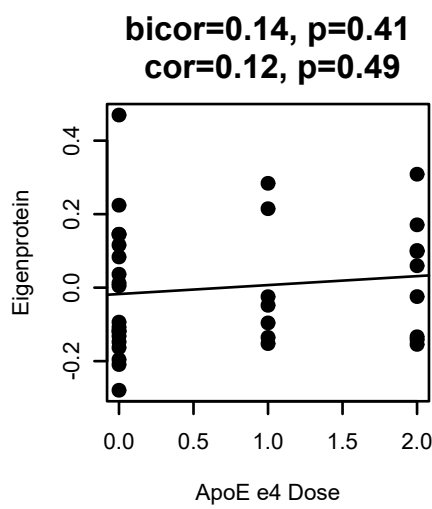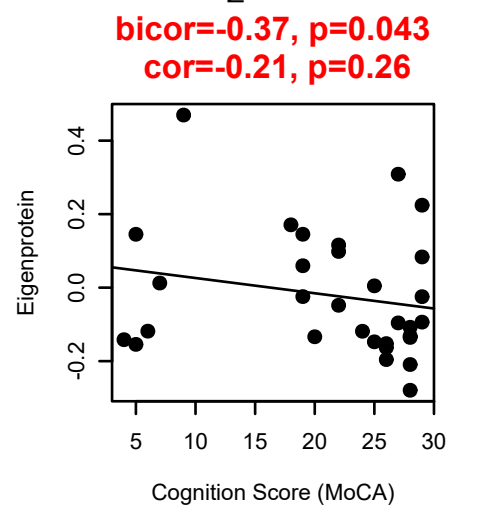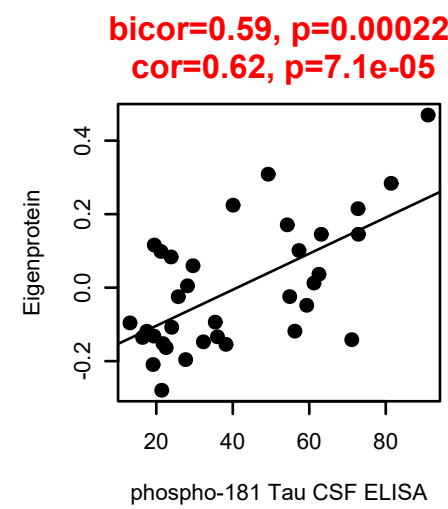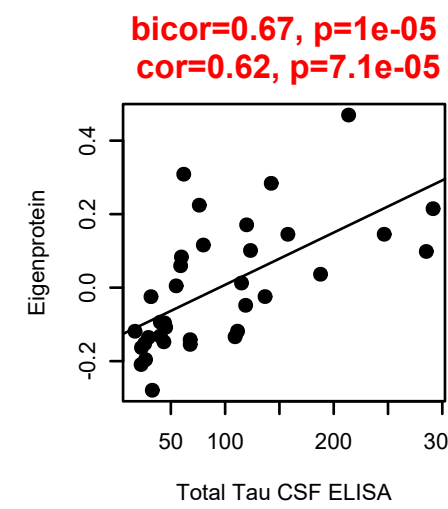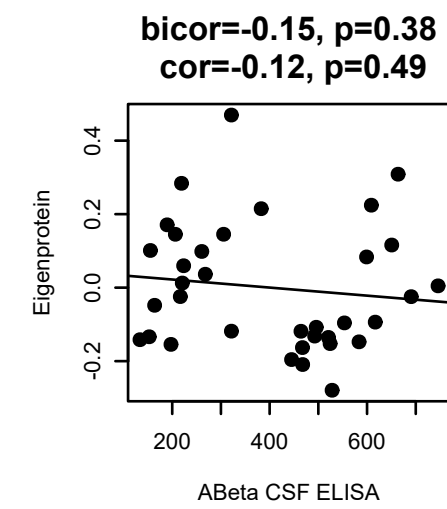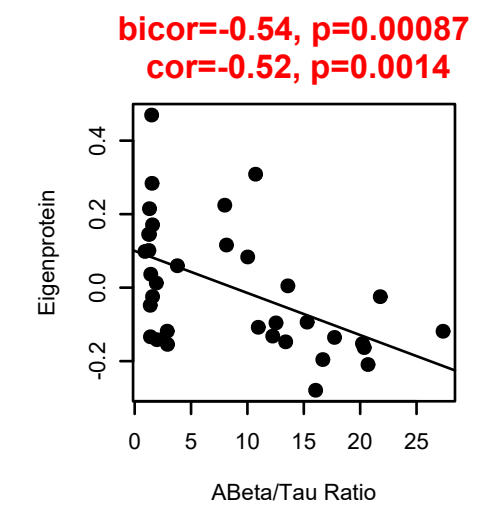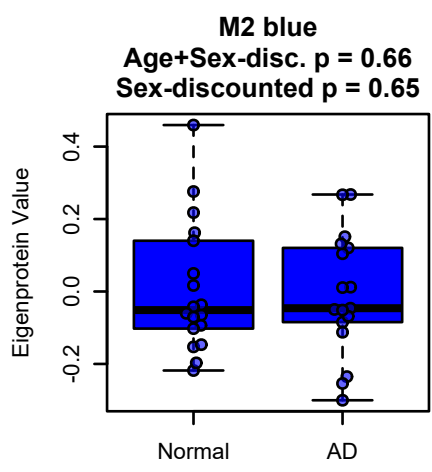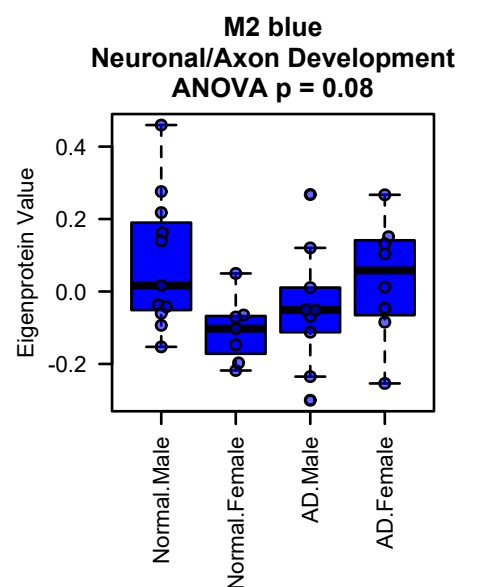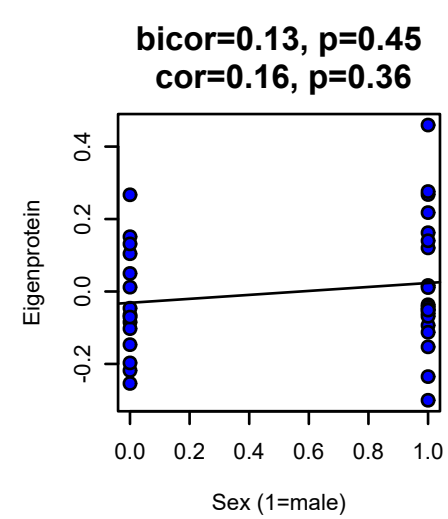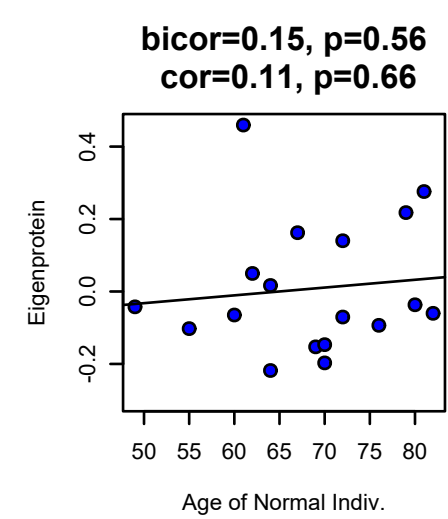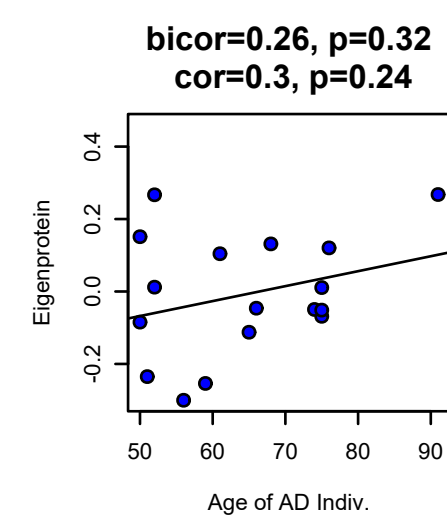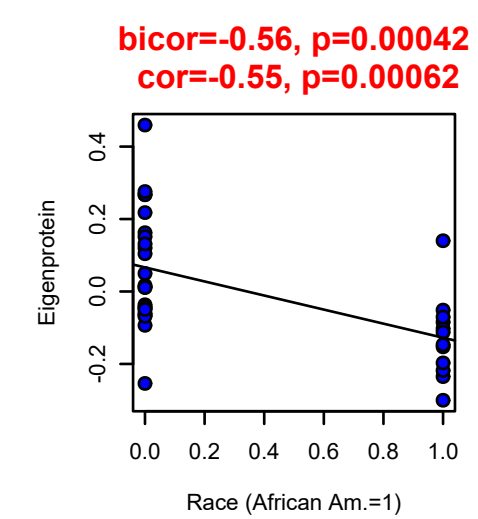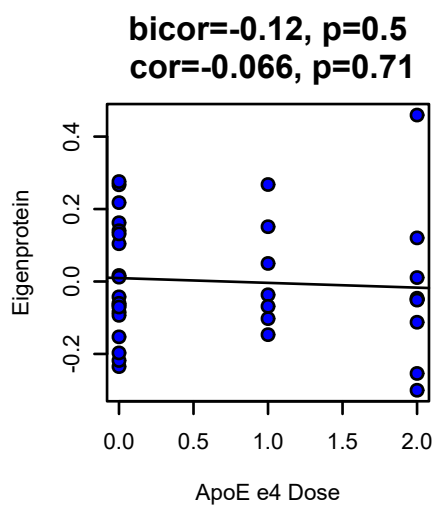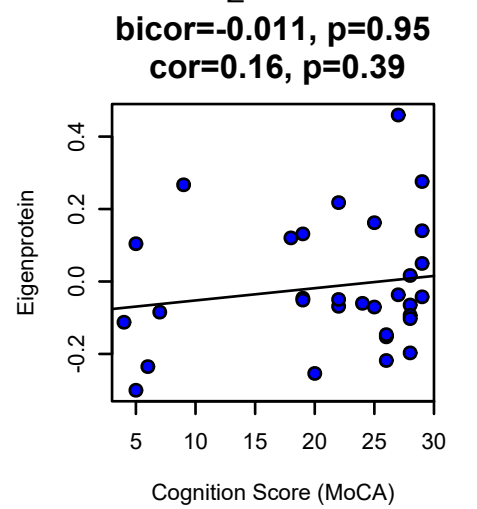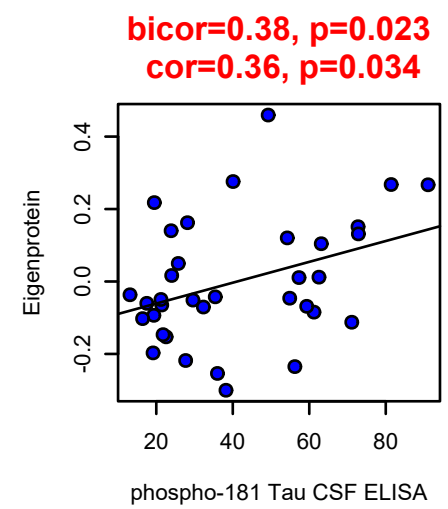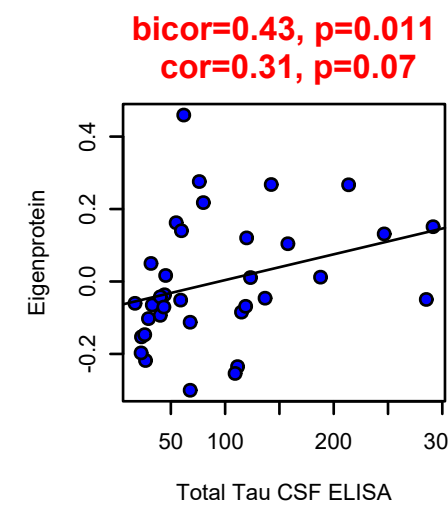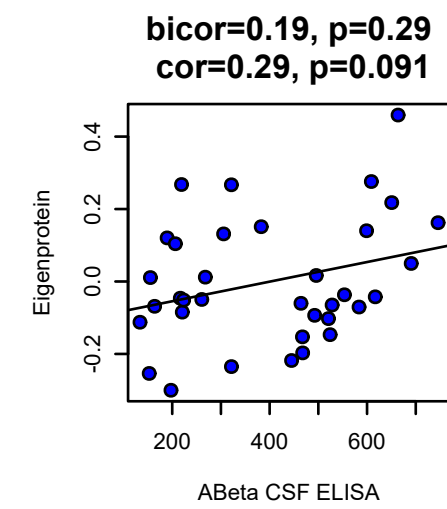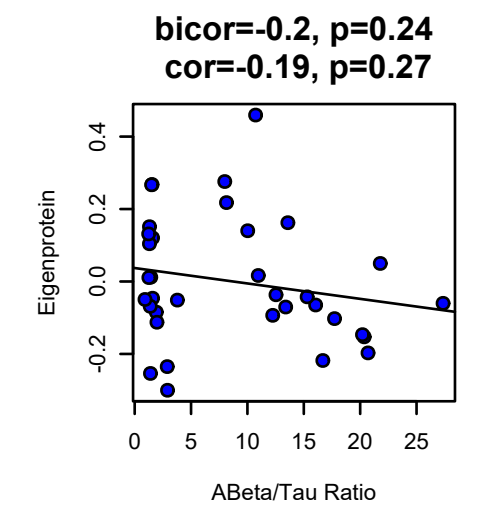

**M14 cyan**  
Age+Sex-disc.  $p = 0.0024$   
Sex-discounted  $p = 0.045$

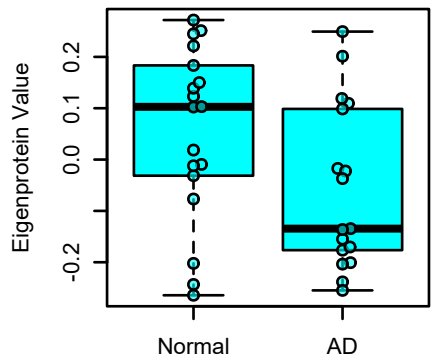

**M14 cyan**  
Golgi/Glycosylation  
ANOVA  $p = 0.0018$

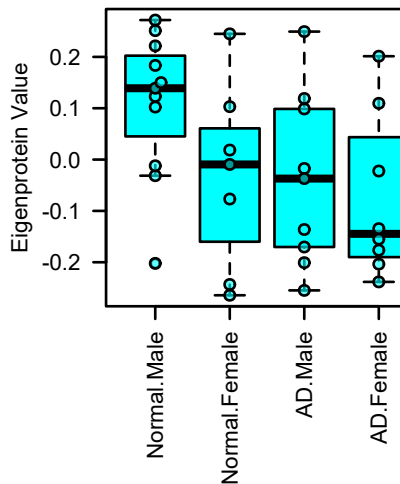

$\text{bicor}=0.29, p=0.093$   
 $\text{cor}=0.29, p=0.091$

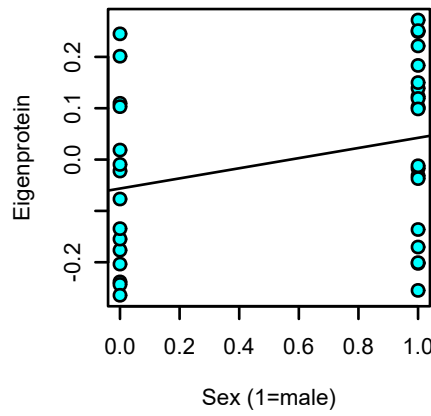

**M14 cyan**  
 $\text{bicor}=0.49, p=0.041$   
 $\text{cor}=0.47, p=0.049$

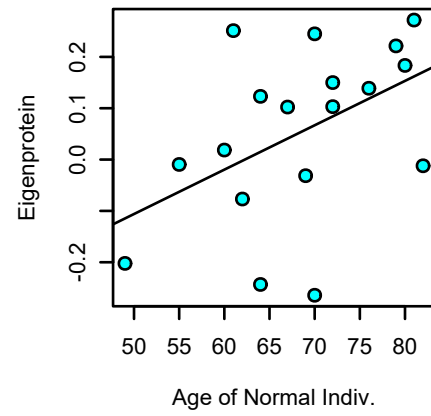

**M14 cyan**  
 $\text{bicor}=0.5, p=0.043$   
 $\text{cor}=0.61, p=0.0093$

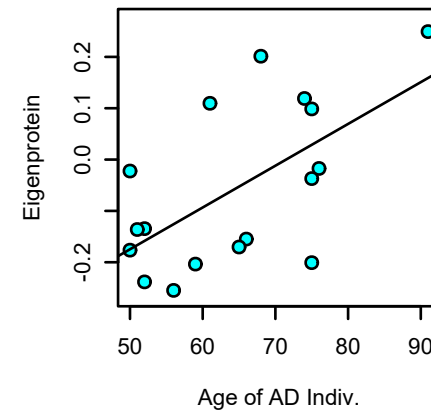

**M14 cyan**  
 $\text{bicor}=-0.29, p=0.088$   
 $\text{cor}=-0.29, p=0.091$

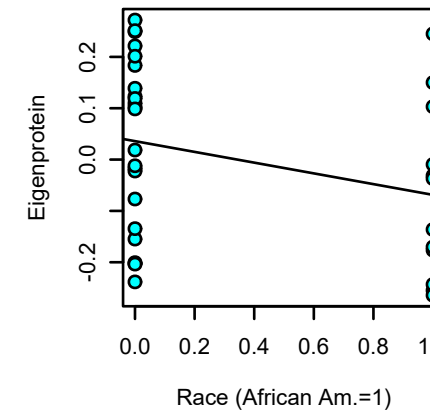

$\text{bicor}=-0.077, p=0.66$   
 $\text{cor}=-0.074, p=0.67$

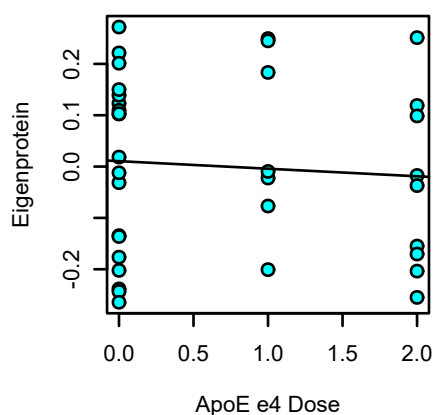

$\text{bicor}=0.28, p=0.13$   
 $\text{cor}=0.38, p=0.035$

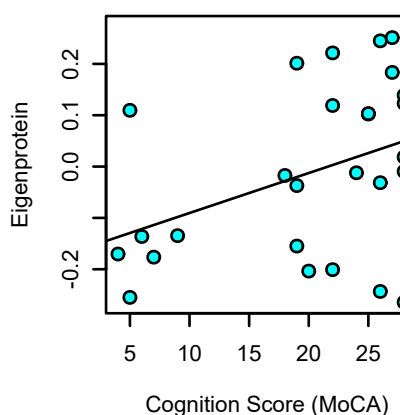

$\text{bicor}=-0.16, p=0.37$   
 $\text{cor}=-0.16, p=0.36$

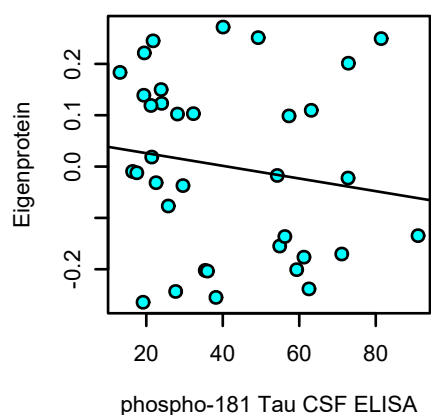

$\text{bicor}=-0.012, p=0.95$   
 $\text{cor}=0.017, p=0.92$

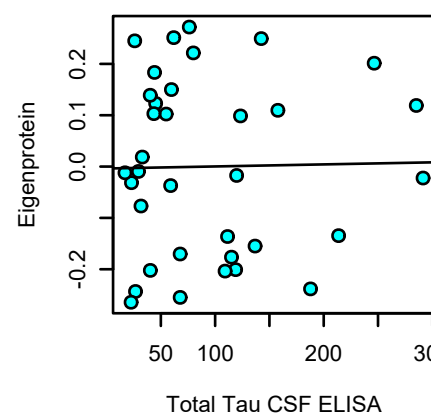

**M14 cyan**  
 $\text{bicor}=0.38, p=0.023$   
 $\text{cor}=0.41, p=0.014$

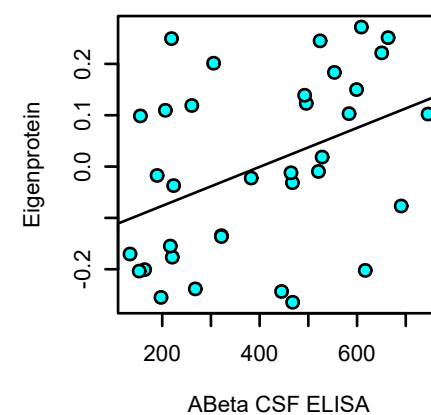

$\text{bicor}=0.1, p=0.56$   
 $\text{cor}=0.082, p=0.64$

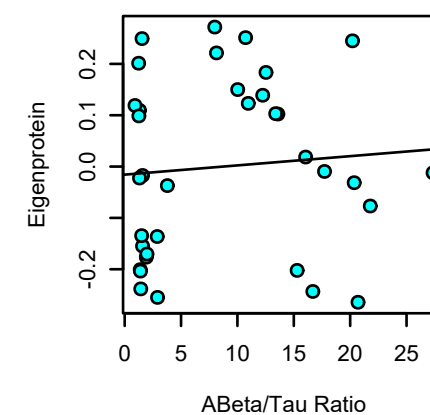

**M27 white**  
Age+Sex-disc.  $p = 0.012$   
Sex-discounted  $p = 0.01$

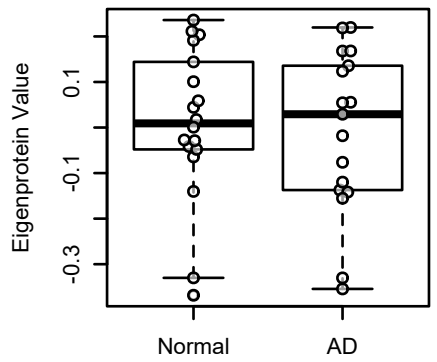

**M27 white**  
Ambiguous  
ANOVA  $p = 0.029$

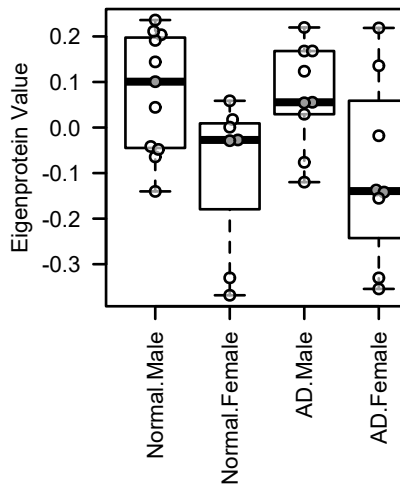

**M27 white**  
 $\text{bicor}=0.49, p=0.0028$   
 $\text{cor}=0.5, p=0.0022$

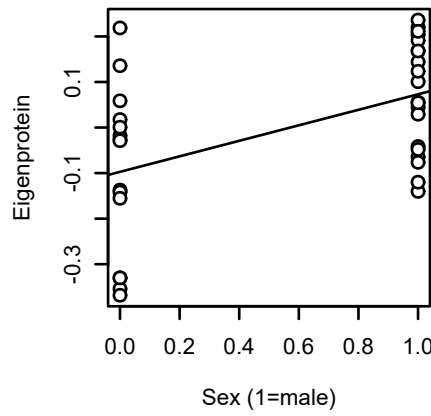

**M27 white**  
 $\text{bicor}=0.24, p=0.34$   
 $\text{cor}=0.25, p=0.32$

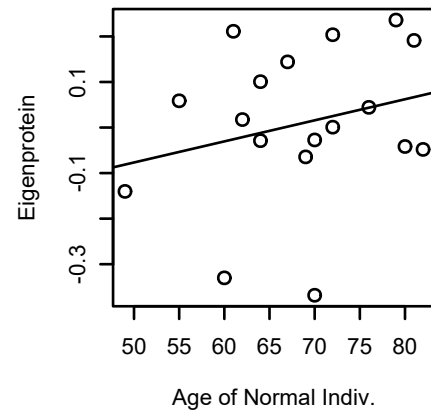

**M27 white**  
 $\text{bicor}=0.58, p=0.014$   
 $\text{cor}=0.55, p=0.022$

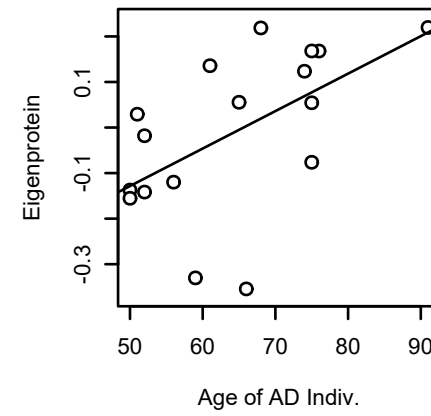

**M27 white**  
 $\text{bicor}=-0.14, p=0.44$   
 $\text{cor}=-0.12, p=0.49$

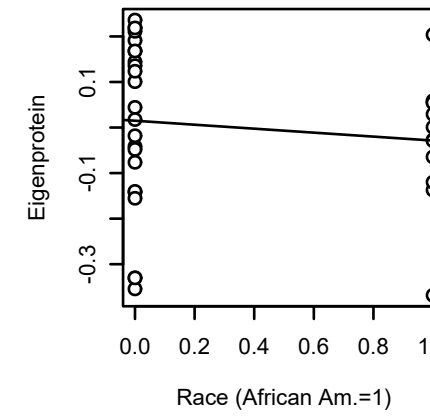

$\text{bicor}=0.0041, p=0.98$   
 $\text{cor}=-0.01, p=0.95$

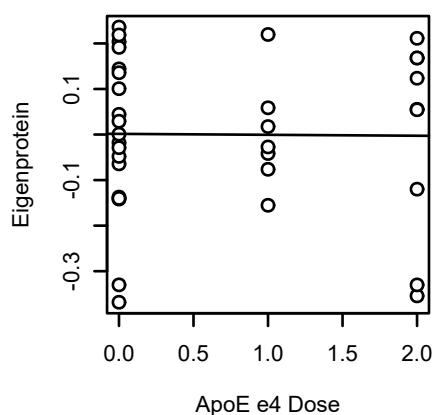

$\text{bicor}=0.041, p=0.83$   
 $\text{cor}=0.0086, p=0.96$

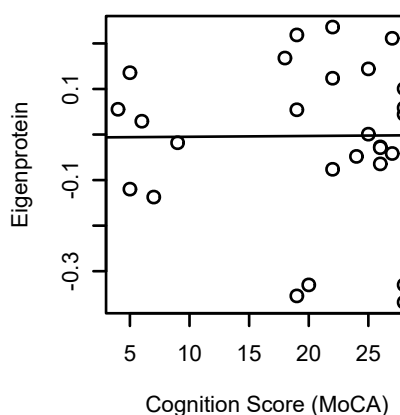

$\text{bicor}=0.072, p=0.68$   
 $\text{cor}=0.11, p=0.53$

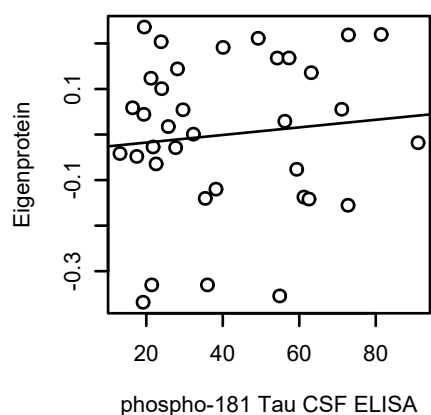

$\text{bicor}=0.098, p=0.57$   
 $\text{cor}=0.1, p=0.57$

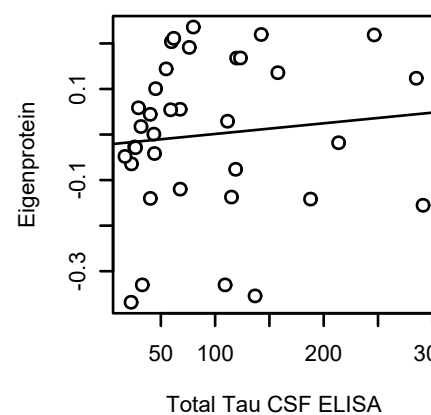

$\text{bicor}=0.18, p=0.3$   
 $\text{cor}=0.17, p=0.33$

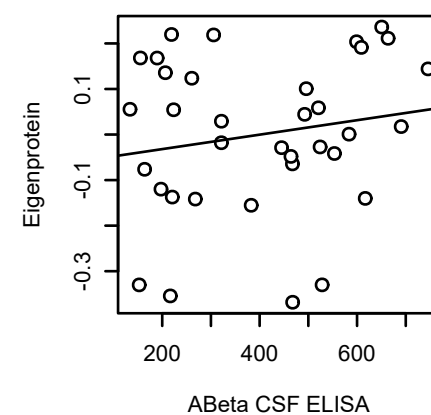

$\text{bicor}=-0.15, p=0.38$   
 $\text{cor}=-0.15, p=0.39$

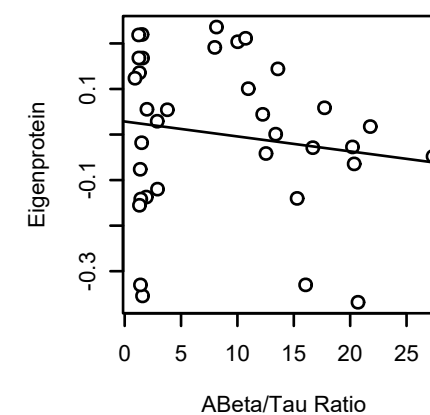

**M31 paleturquoise**  
Age+Sex-disc.  $p = 0.42$   
Sex-discounted  $p = 0.3$

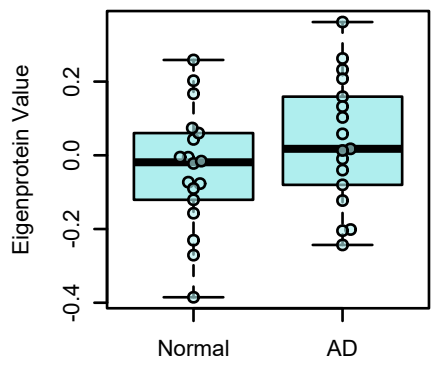

**M31 paleturquoise**  
ANOVA  $p = 0.44$

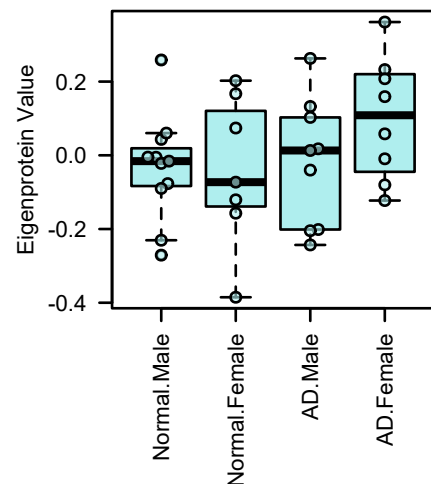

**bicor=-0.18, p=0.29**  
**cor=-0.18, p=0.3**

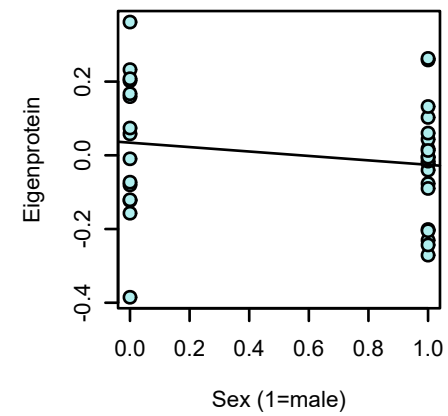

**bicor=-0.36, p=0.14**  
**cor=-0.34, p=0.17**

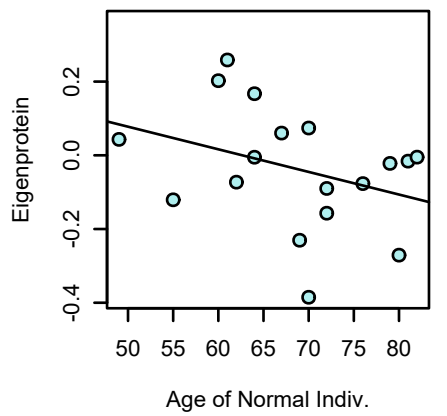

**bicor=-0.049, p=0.85**  
**cor=-0.05, p=0.85**

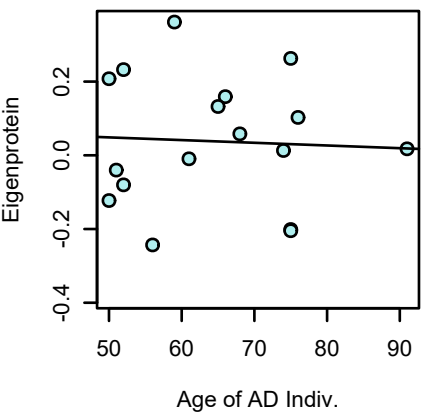

**bicor=-0.43, p=0.0096**  
**cor=-0.43, p=0.0099**

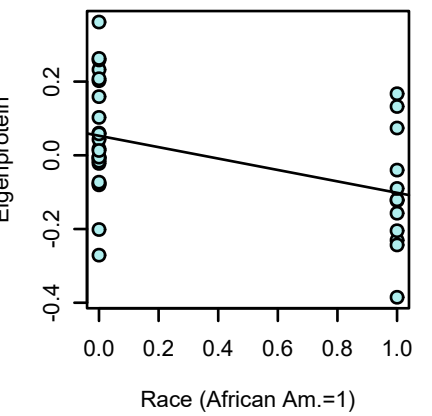

**bicor=0.075, p=0.67**  
**cor=0.079, p=0.65**

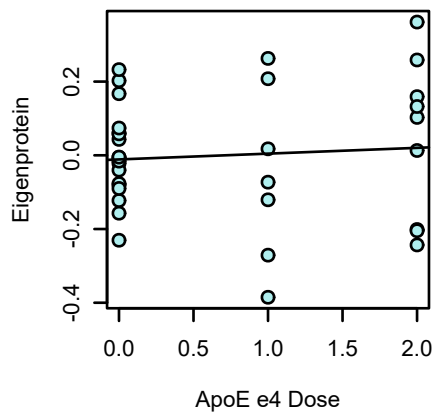

**bicor=-0.1, p=0.59**  
**cor=0.033, p=0.86**

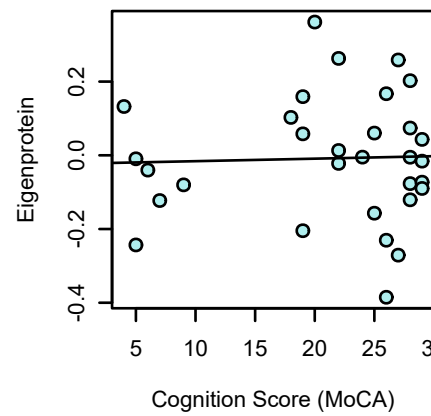

**bicor=0.33, p=0.053**  
**cor=0.31, p=0.07**

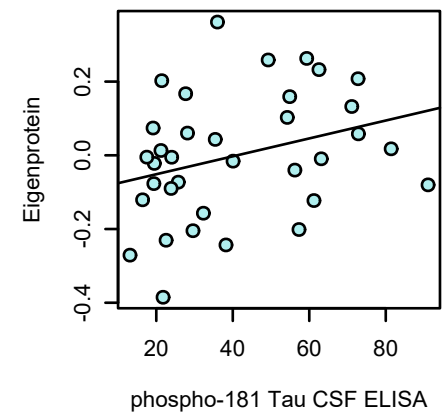

**bicor=0.31, p=0.074**  
**cor=0.3, p=0.08**

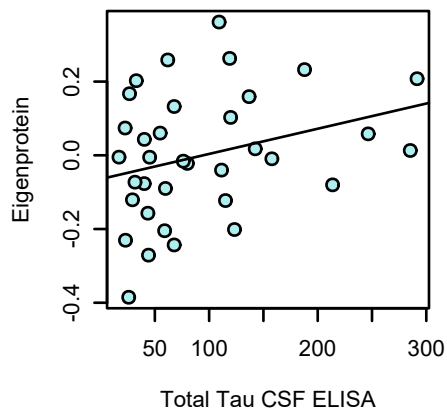

**bicor=-0.16, p=0.36**  
**cor=-0.17, p=0.33**

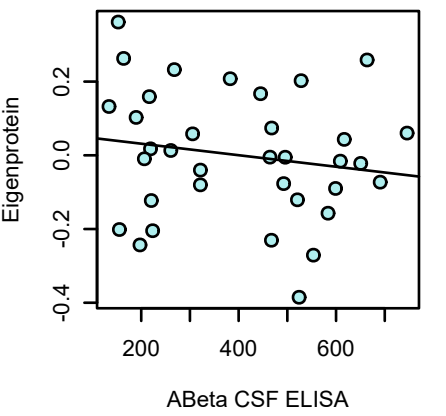

**bicor=-0.25, p=0.15**  
**cor=-0.27, p=0.12**

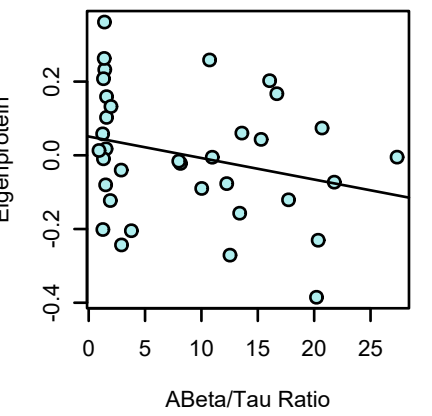

**M32 violet**  
Age+Sex-disc.  $p = 0.2$   
Sex-discounted  $p = 0.092$

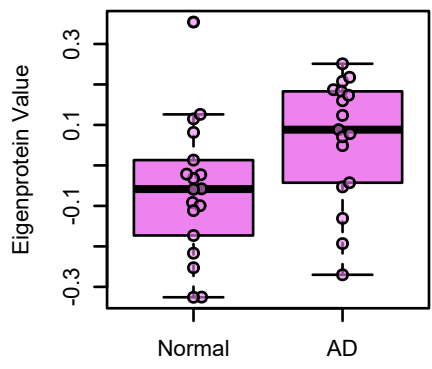

**M32 violet**  
ANOVA  $p = 0.21$

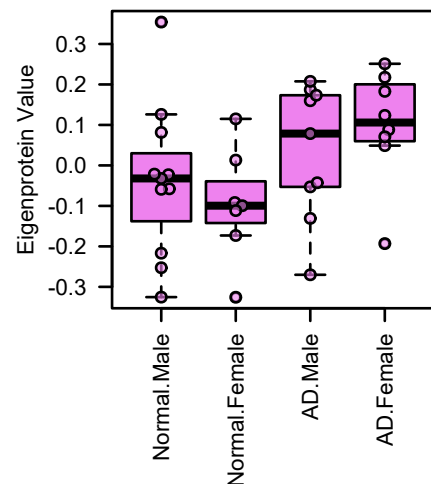

**bicor=-0.045, p=0.8**  
**cor=-0.04, p=0.82**

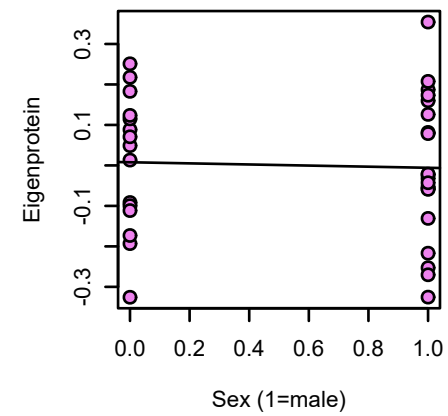

**bicor=-0.29, p=0.25**  
**cor=-0.3, p=0.23**

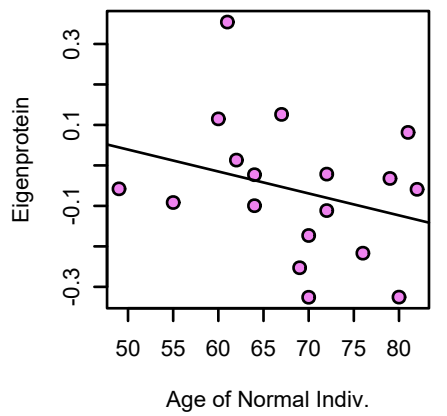

**bicor=0.27, p=0.3**  
**cor=0.28, p=0.28**

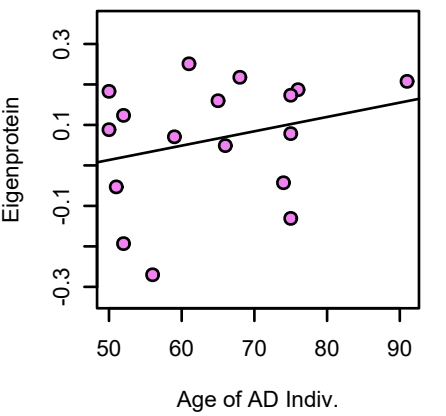

**bicor=-0.46, p=0.0055**  
**cor=-0.46, p=0.0054**

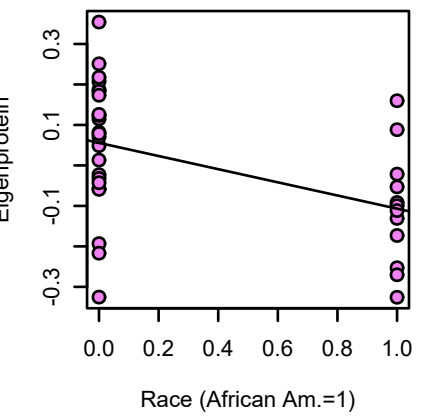

**bicor=0.15, p=0.4**  
**cor=0.15, p=0.39**

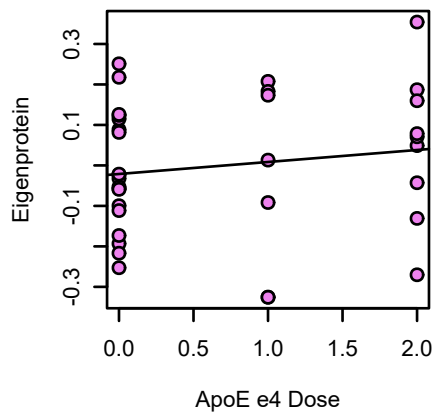

**bicor=-0.23, p=0.2**  
**cor=-0.17, p=0.36**

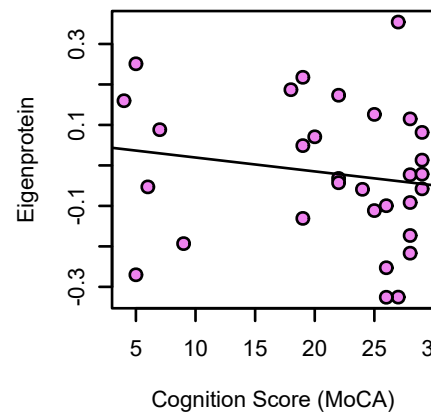

**bicor=0.61, p=9.3e-05**  
**cor=0.56, p=0.00047**

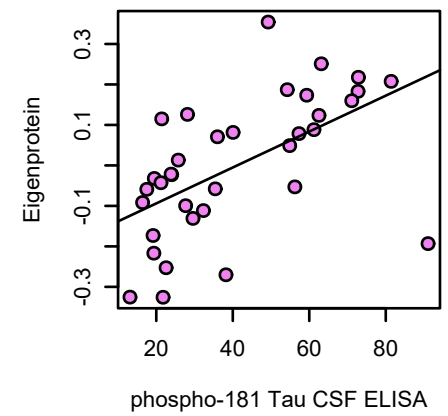

**bicor=0.52, p=0.0015**  
**cor=0.42, p=0.012**

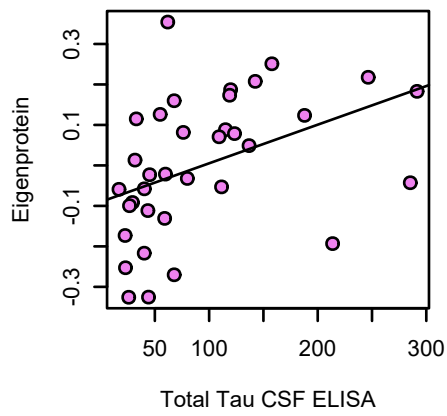

**bicor=-0.26, p=0.13**  
**cor=-0.22, p=0.2**

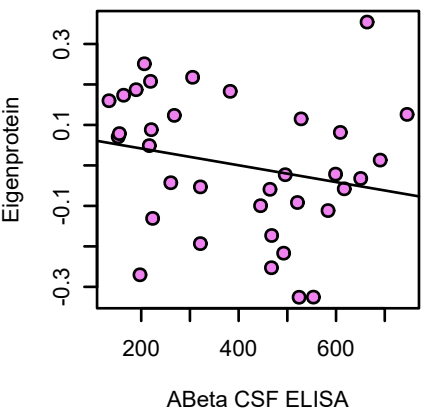

**bicor=-0.46, p=0.0055**  
**cor=-0.46, p=0.0054**

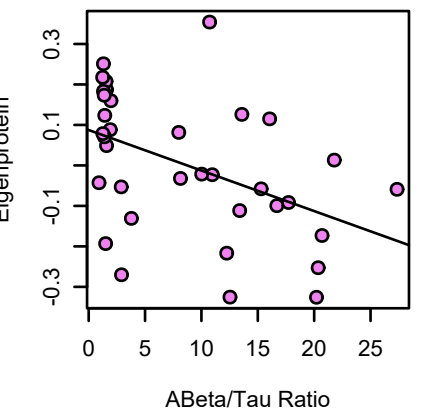

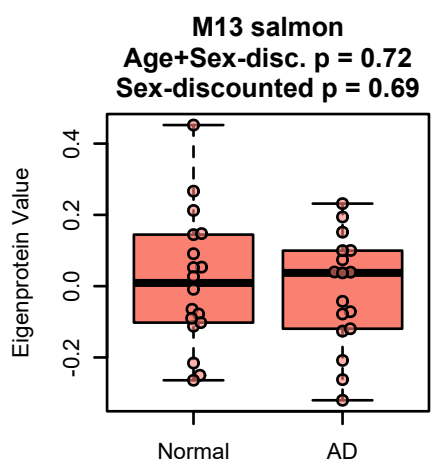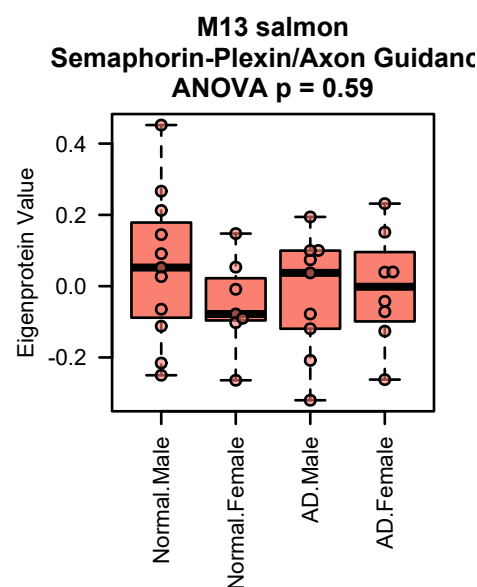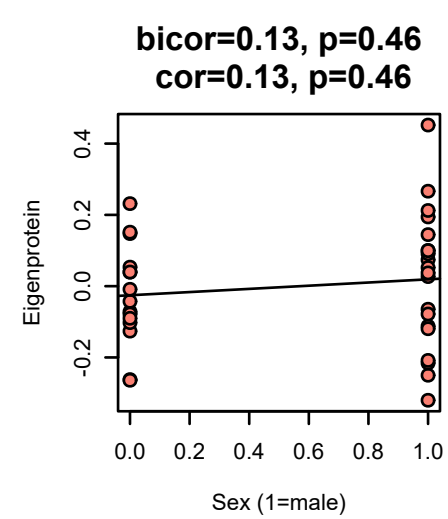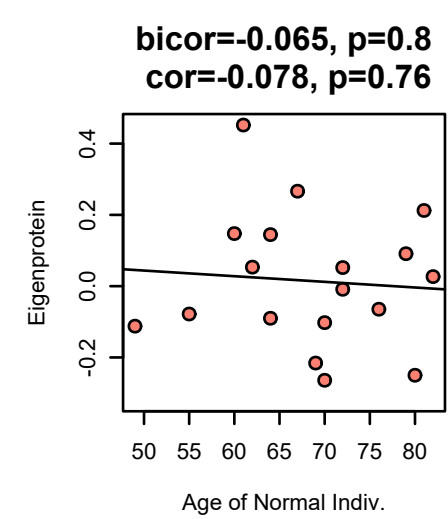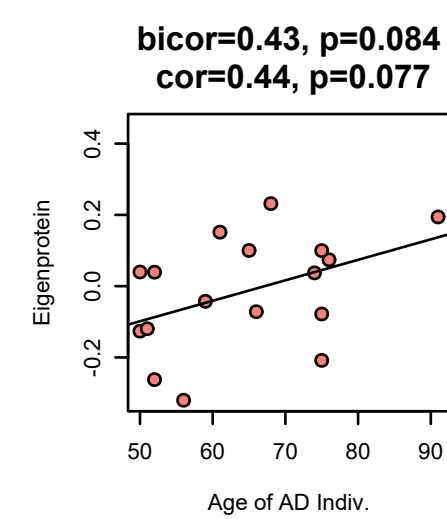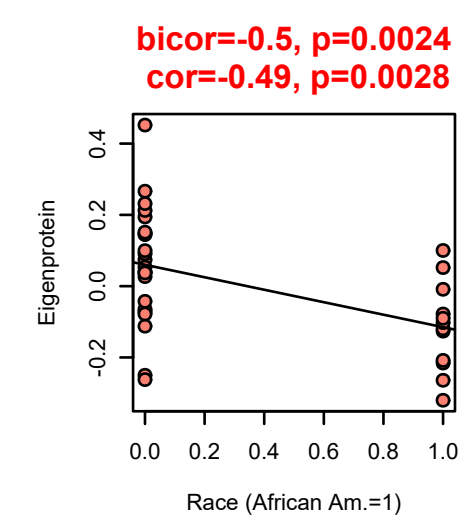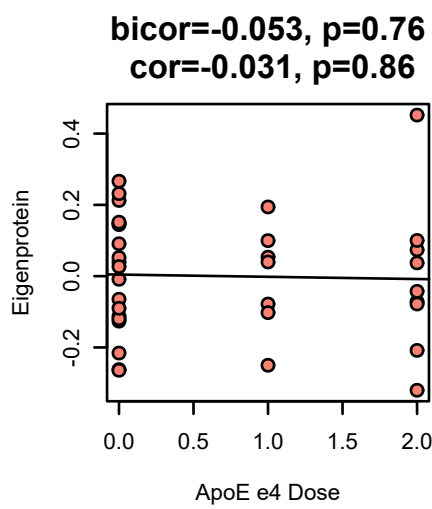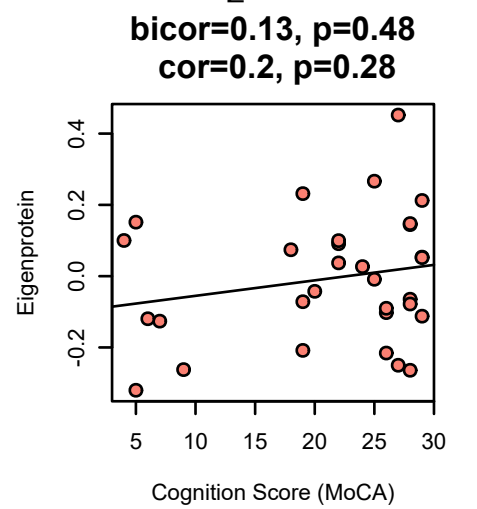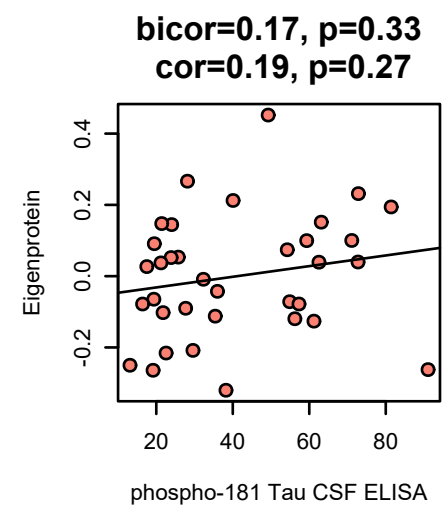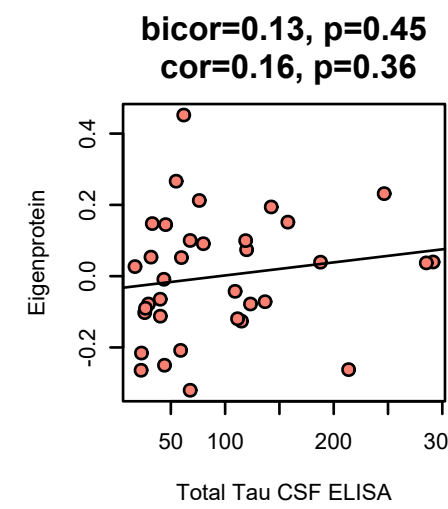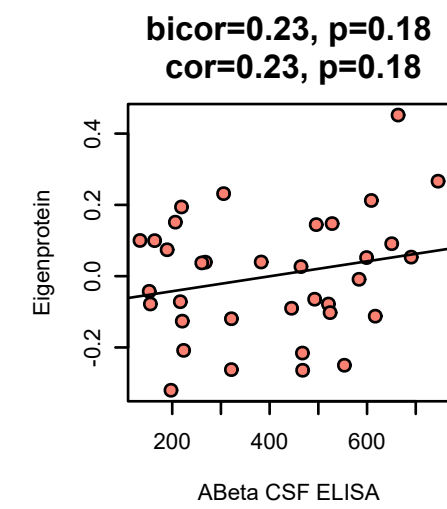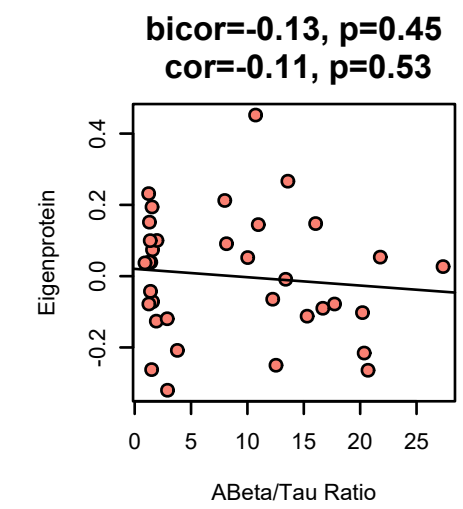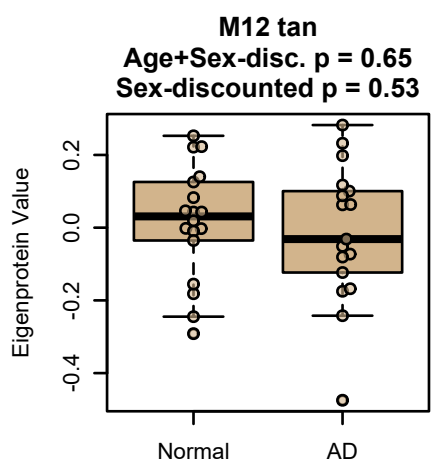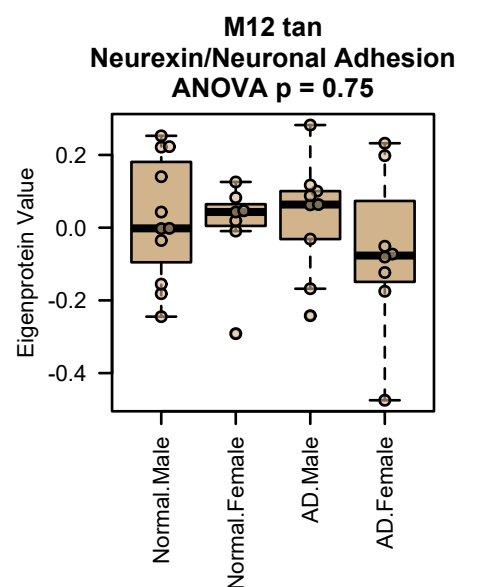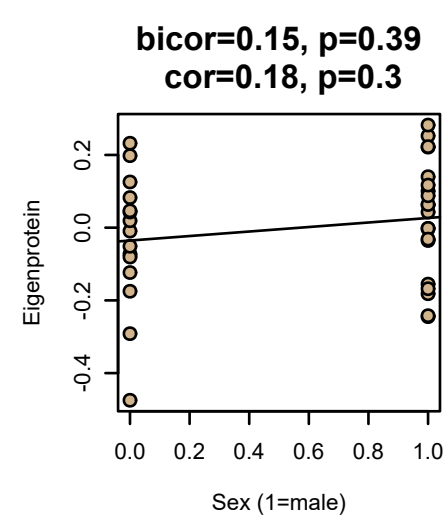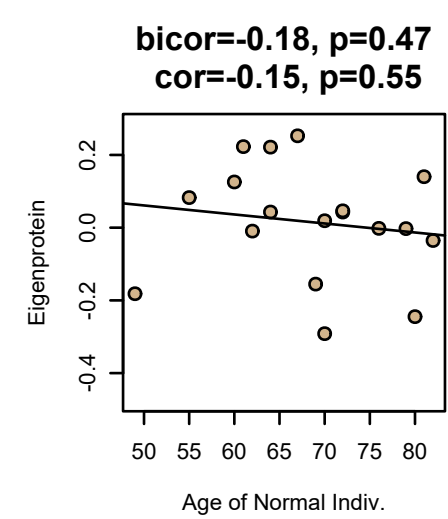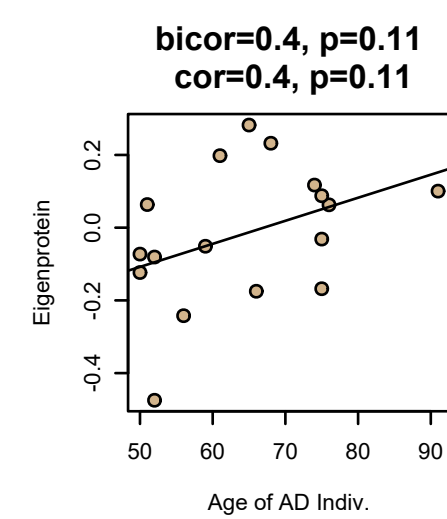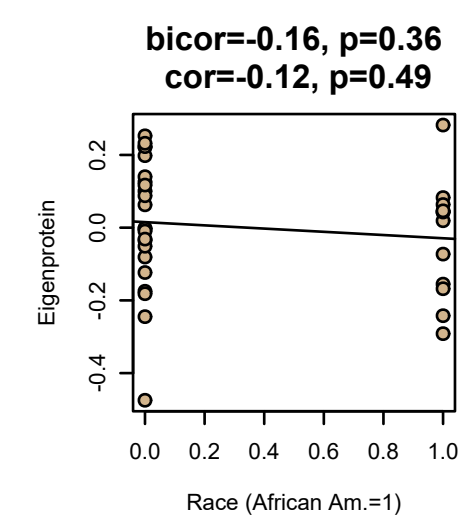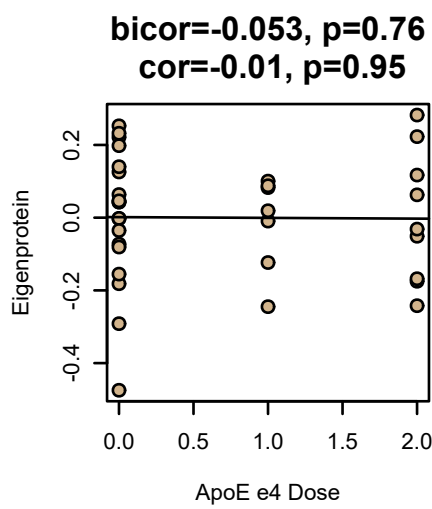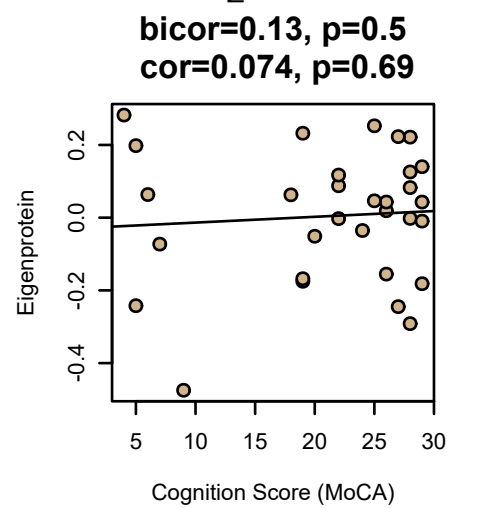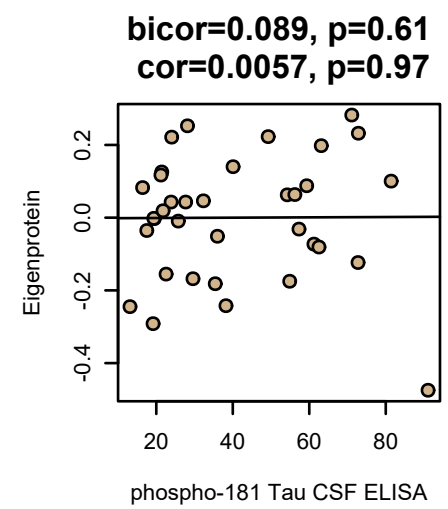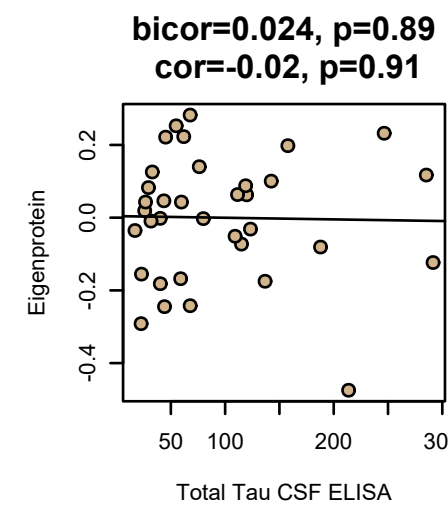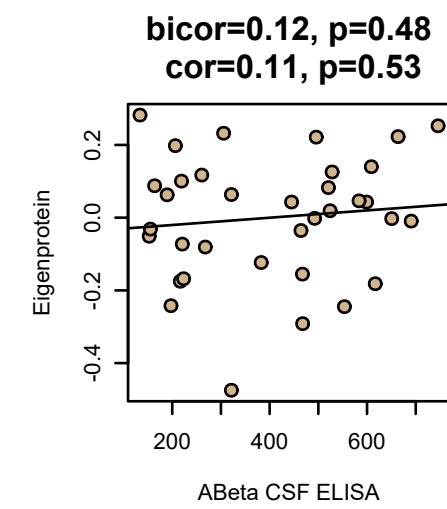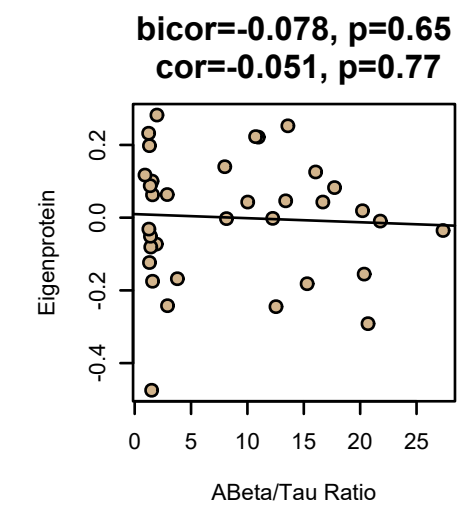



**M9 magenta**  
Age+Sex-disc.  $p = 0.032$   
Sex-discounted  $p = 0.042$

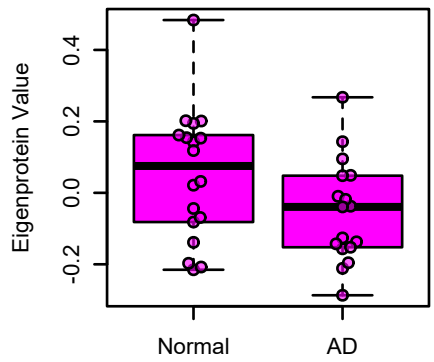

**M9 magenta**  
Ambiguous  
ANOVA  $p = 0.042$

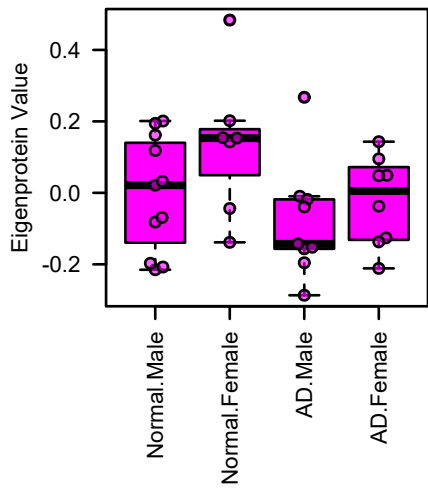

$\text{bicor} = -0.26, p = 0.14$   
 $\text{cor} = -0.27, p = 0.12$

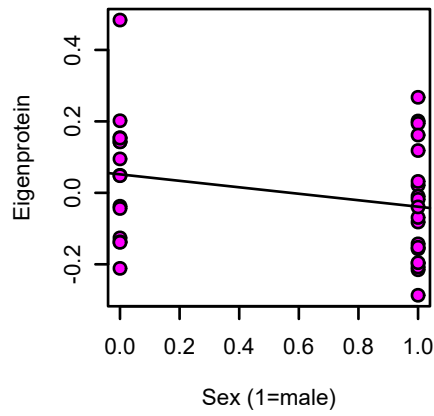

$\text{bicor} = -0.35, p = 0.16$   
 $\text{cor} = -0.34, p = 0.17$

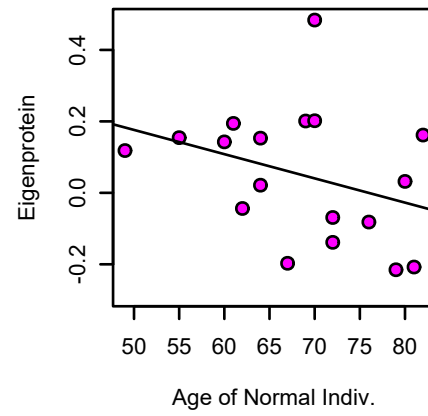

$\text{bicor} = -0.44, p = 0.076$   
 $\text{cor} = -0.45, p = 0.07$

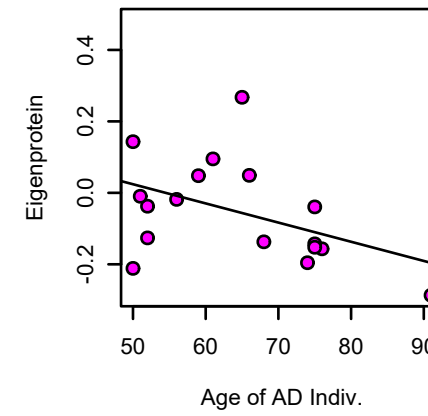

**$\text{bicor} = 0.46, p = 0.0052$**   
 **$\text{cor} = 0.47, p = 0.0044$**

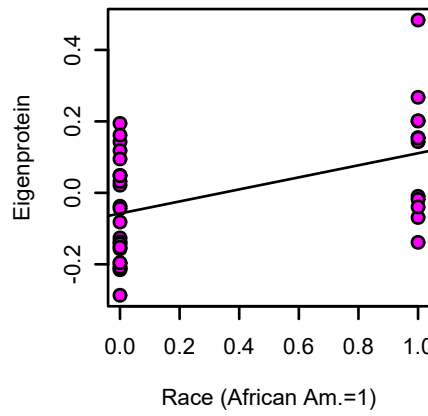

$\text{bicor} = -0.017, p = 0.92$   
 $\text{cor} = -0.0044, p = 0.98$

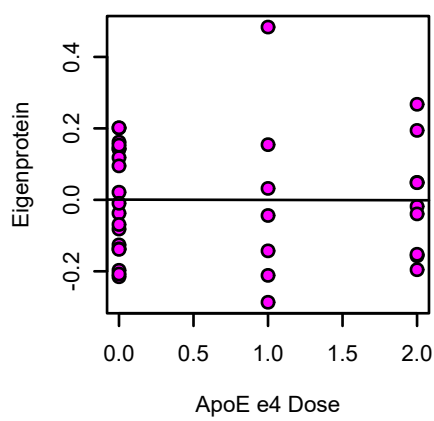

$\text{bicor} = 0.2, p = 0.28$   
 $\text{cor} = -0.027, p = 0.89$

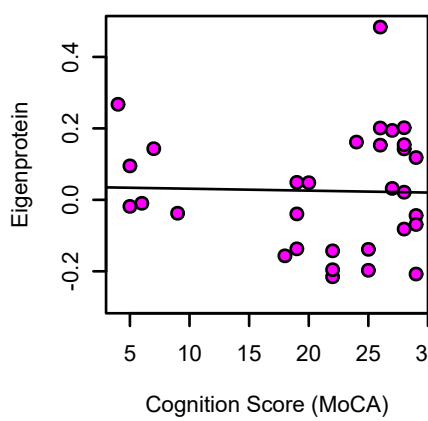

$\text{bicor} = -0.24, p = 0.16$   
 $\text{cor} = -0.27, p = 0.12$

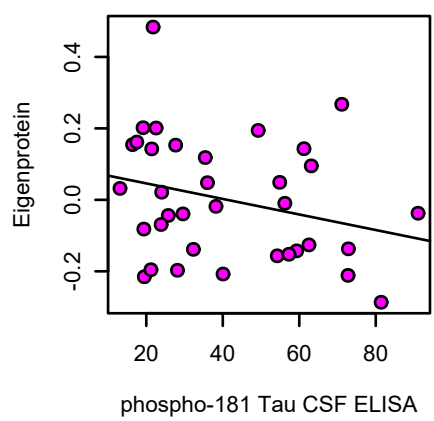

**$\text{bicor} = -0.48, p = 0.0036$**   
 **$\text{cor} = -0.51, p = 0.0017$**

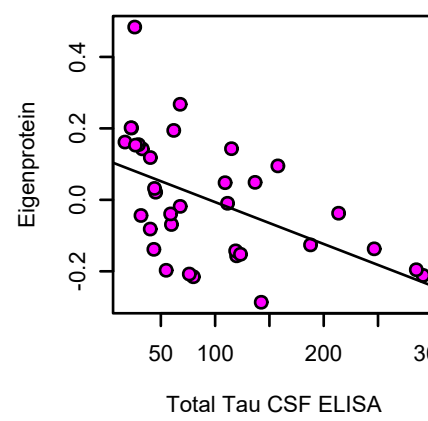

$\text{bicor} = 0.064, p = 0.71$   
 $\text{cor} = 0.088, p = 0.62$

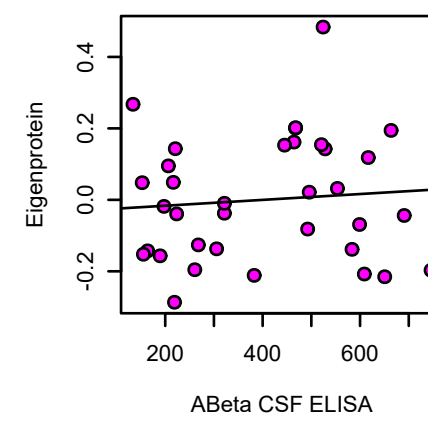

**$\text{bicor} = 0.5, p = 0.0023$**   
 **$\text{cor} = 0.5, p = 0.0022$**

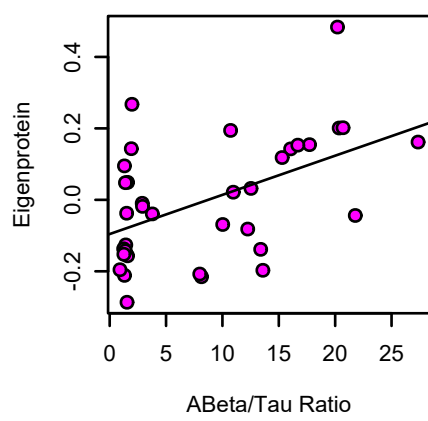

**M30 steelblue**  
Age+Sex-disc.  $p = 0.18$   
Sex-discounted  $p = 0.12$

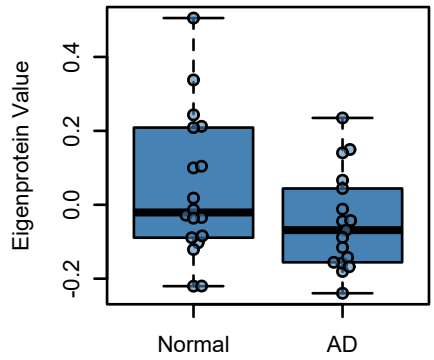

**M30 steelblue**  
Ribonucleoprotein Complex  
ANOVA  $p = 0.3$

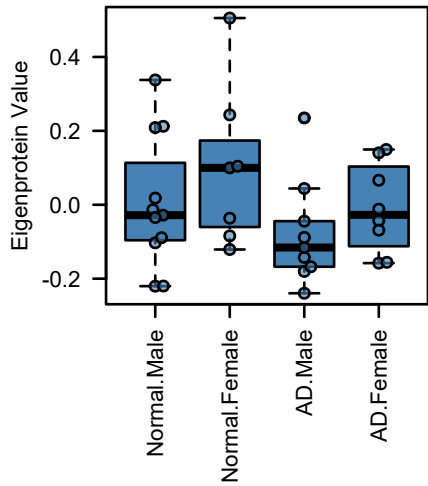

$\text{bicor} = -0.21, p = 0.23$   
 $\text{cor} = -0.22, p = 0.2$

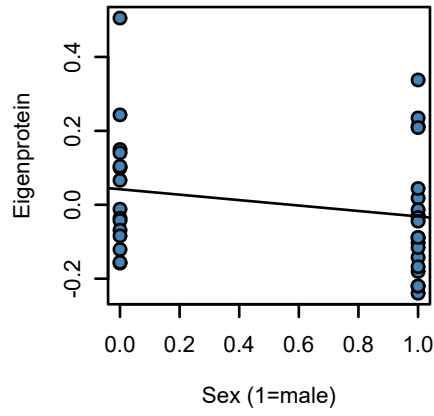

$\text{bicor} = -0.24, p = 0.33$   
 $\text{cor} = -0.17, p = 0.5$

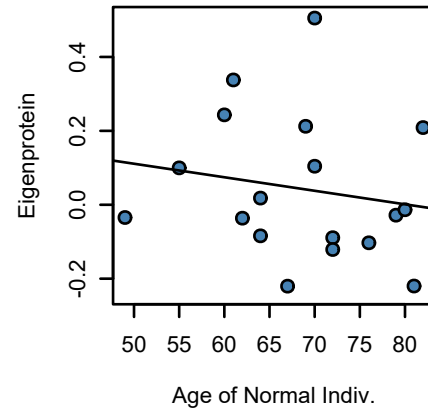

$\text{bicor} = -0.33, p = 0.2$   
 $\text{cor} = -0.33, p = 0.2$

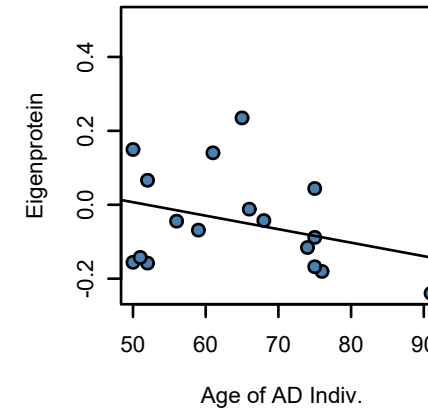

$\text{bicor} = 0.29, p = 0.087$   
 $\text{cor} = 0.31, p = 0.07$

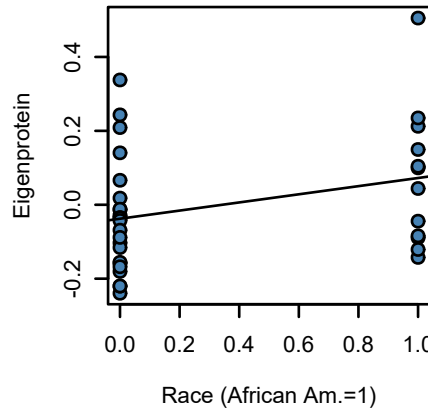

$\text{bicor} = 0.0064, p = 0.97$   
 $\text{cor} = 0.041, p = 0.82$

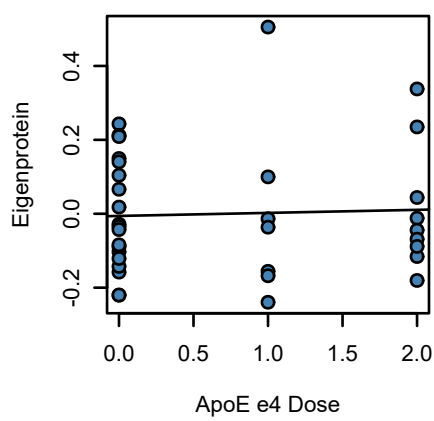

$\text{bicor} = 0.0018, p = 0.99$   
 $\text{cor} = -0.053, p = 0.78$

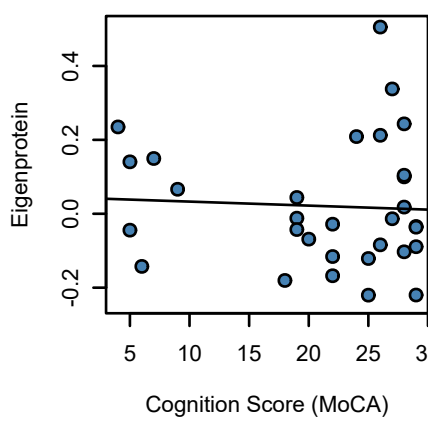

$\text{bicor} = -0.15, p = 0.38$   
 $\text{cor} = -0.2, p = 0.25$

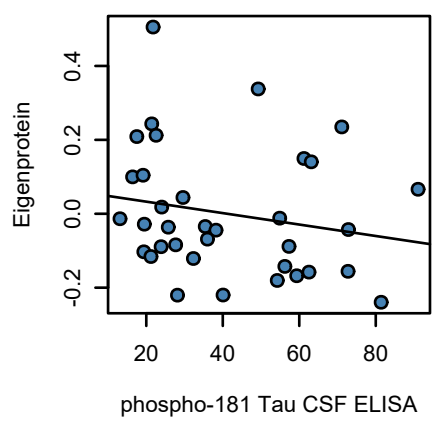

$\text{bicor} = -0.31, p = 0.066$   
 $\text{cor} = -0.36, p = 0.034$

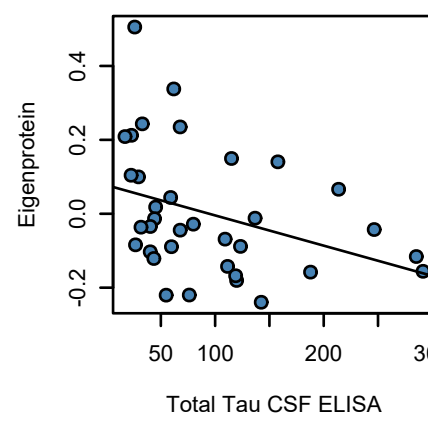

$\text{bicor} = 0.046, p = 0.79$   
 $\text{cor} = 0.12, p = 0.49$

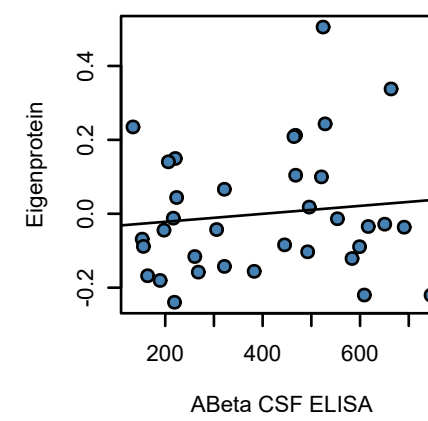

**$\text{bicor} = 0.4, p = 0.018$**   
 **$\text{cor} = 0.42, p = 0.012$**

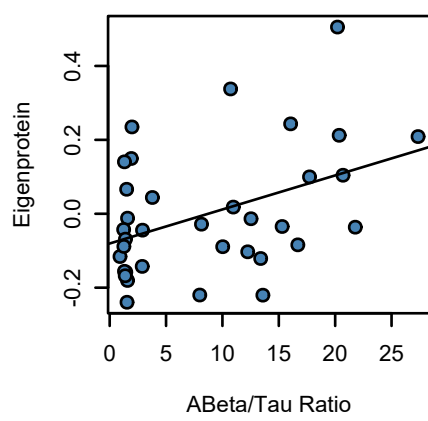

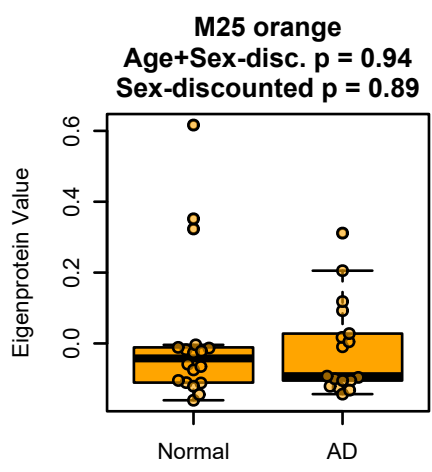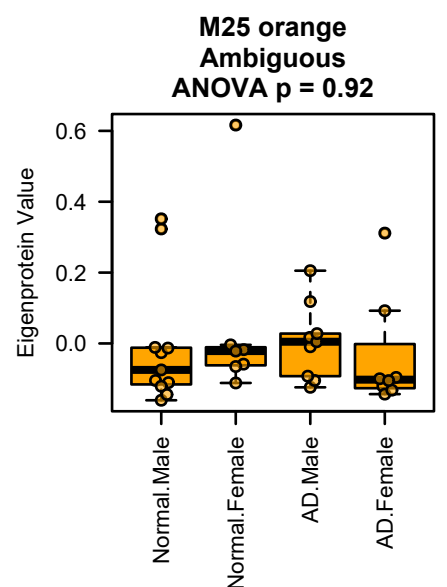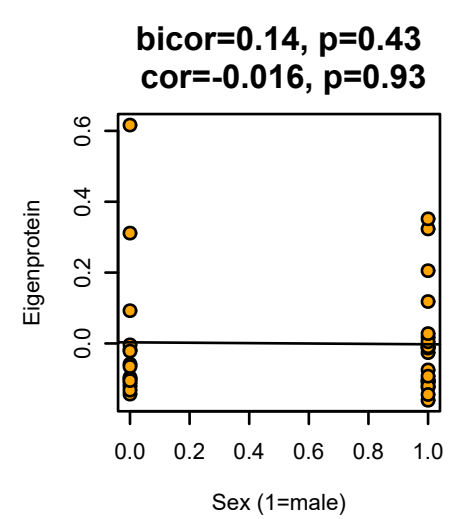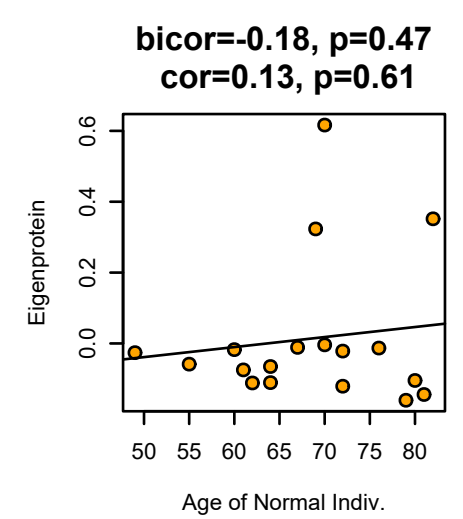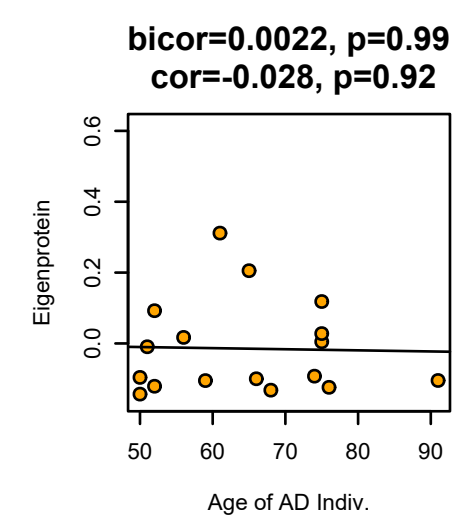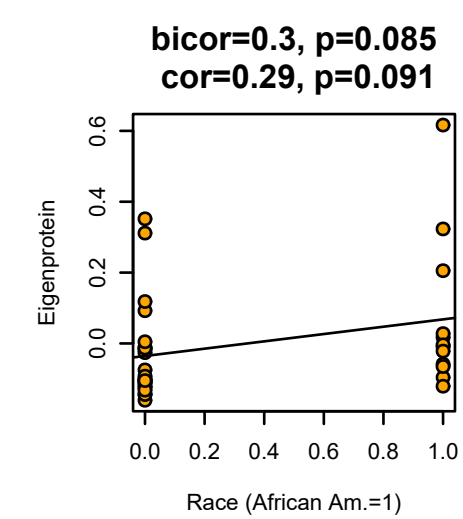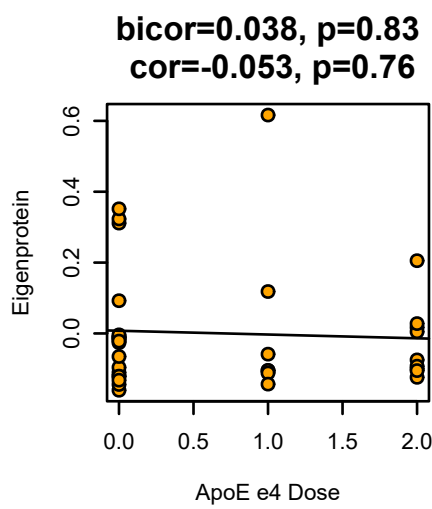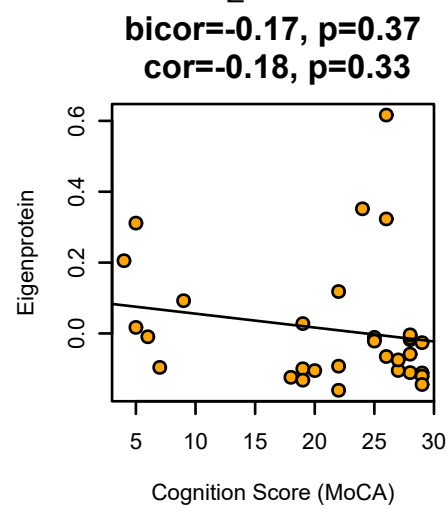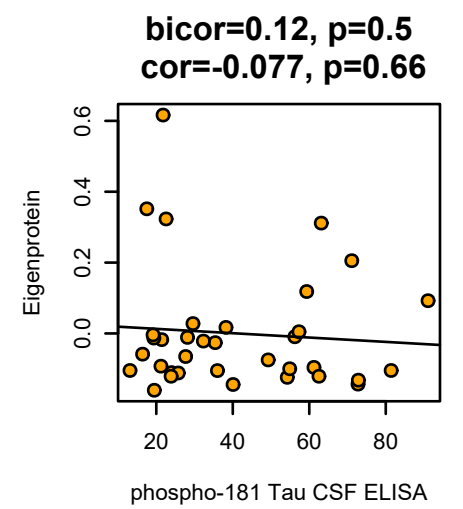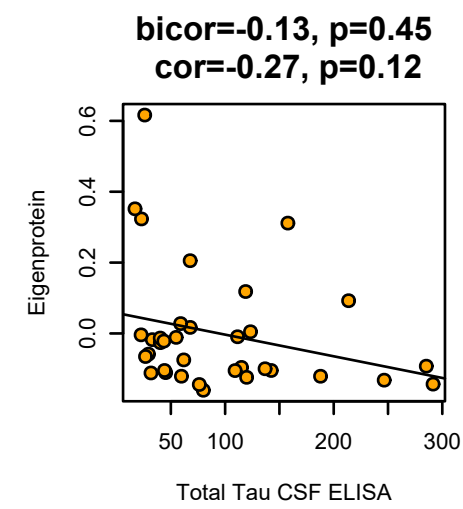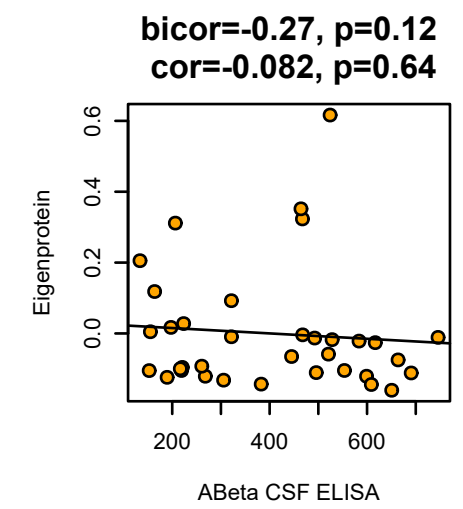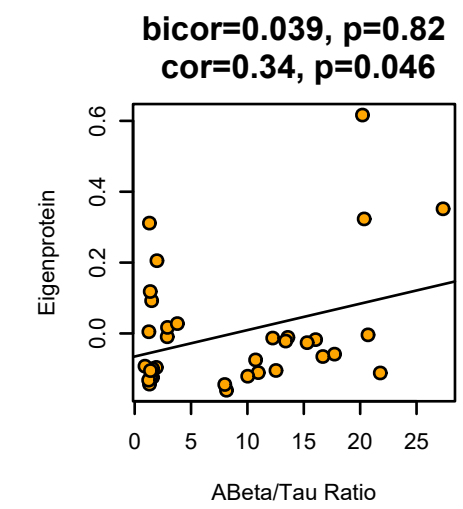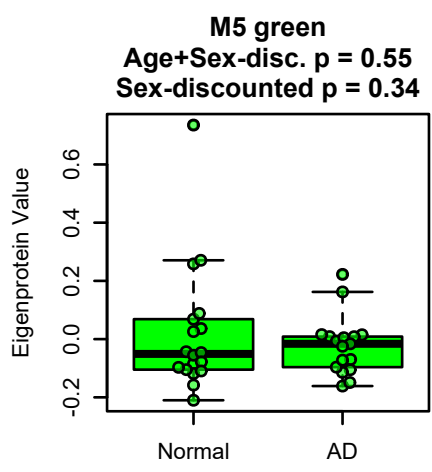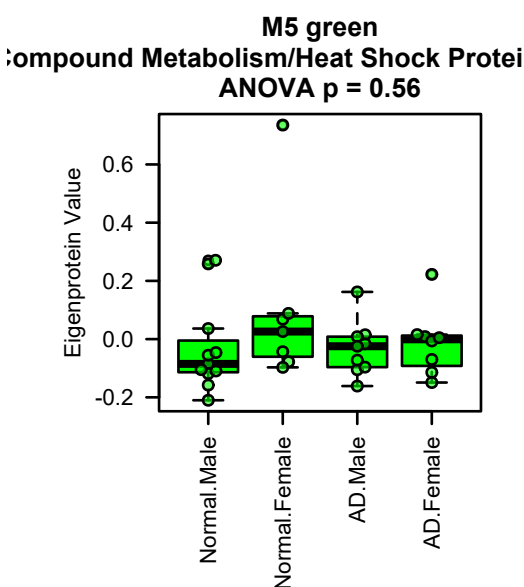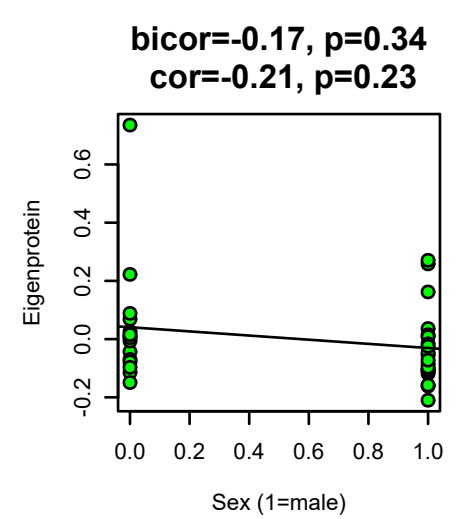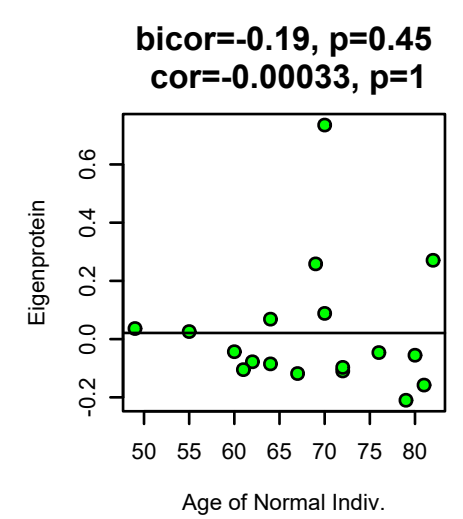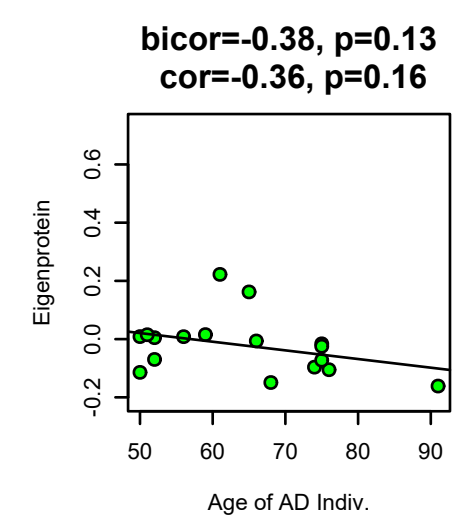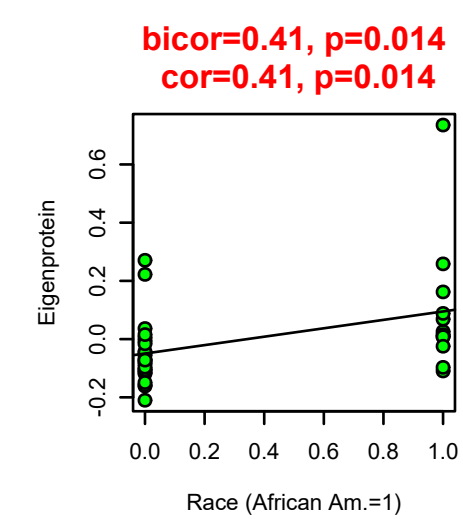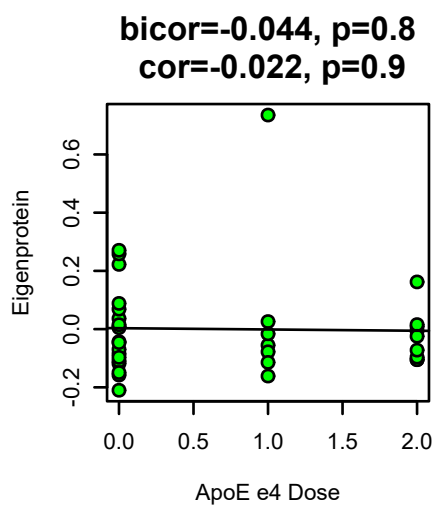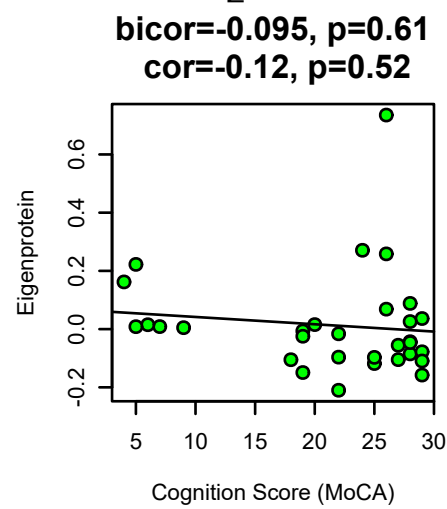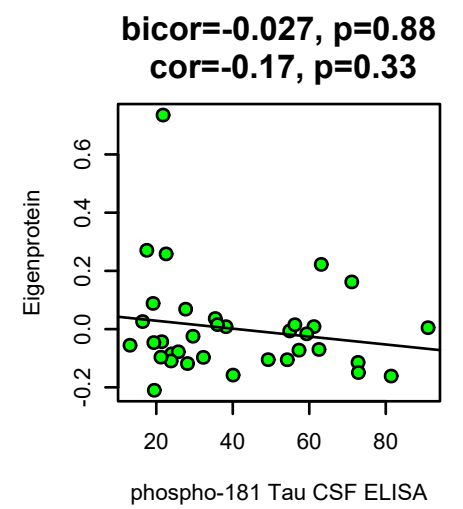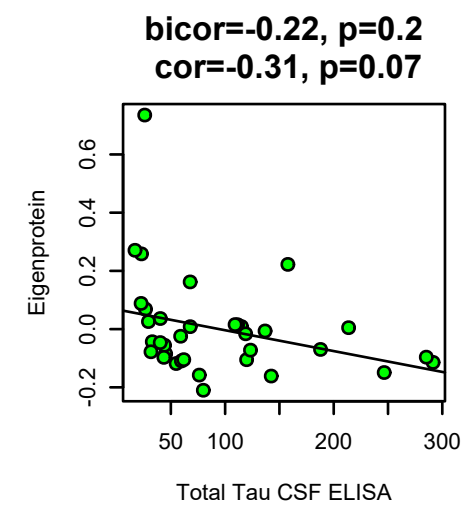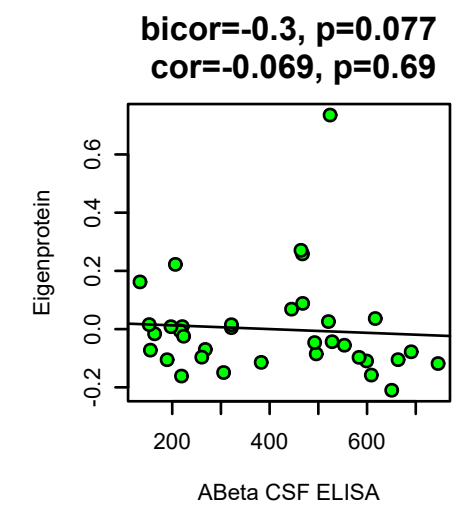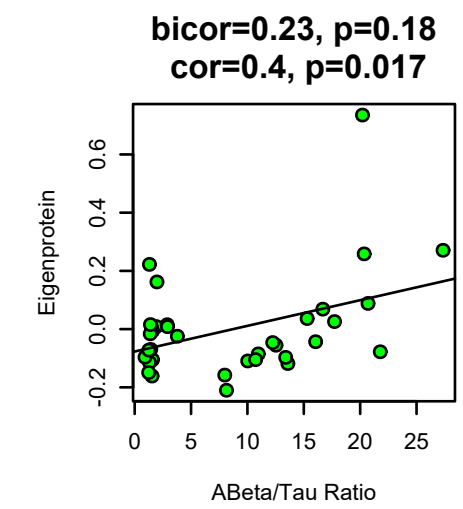

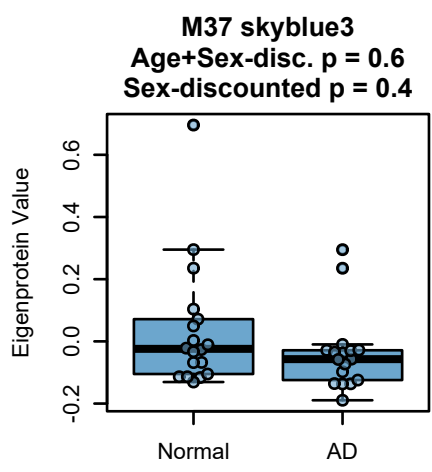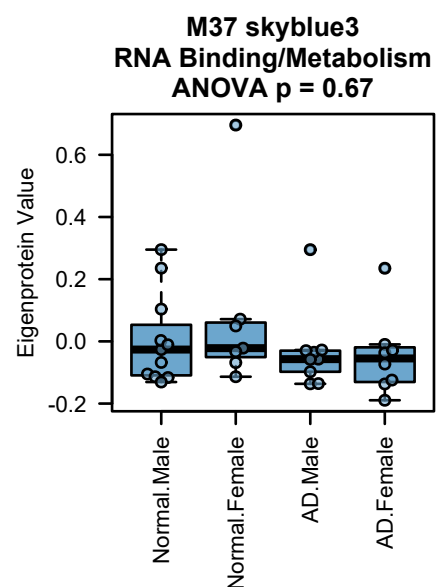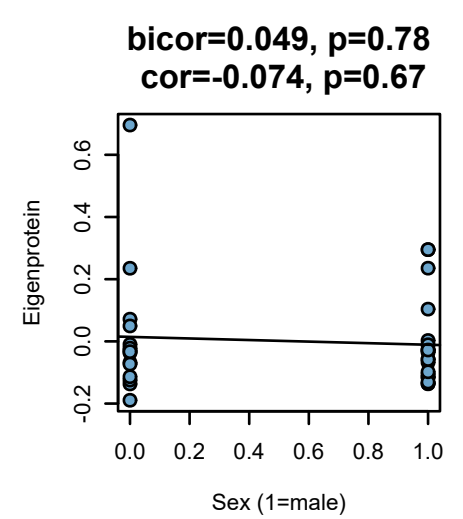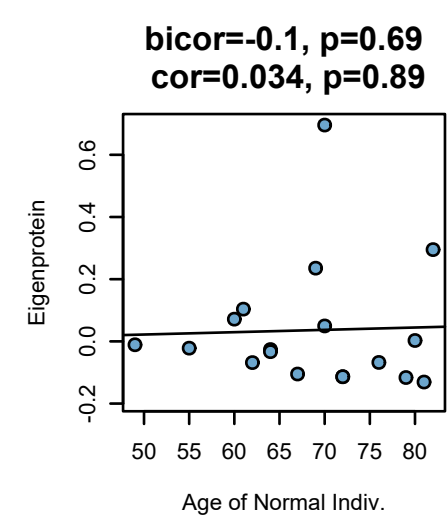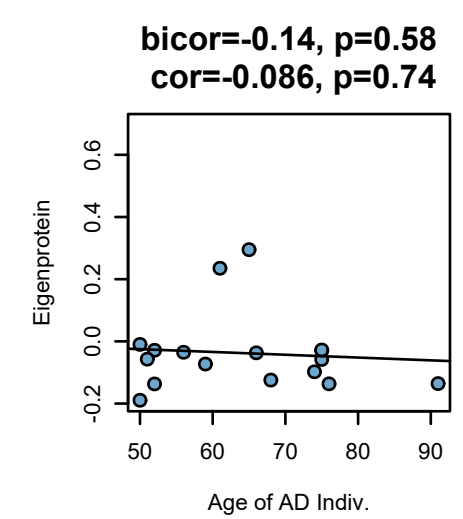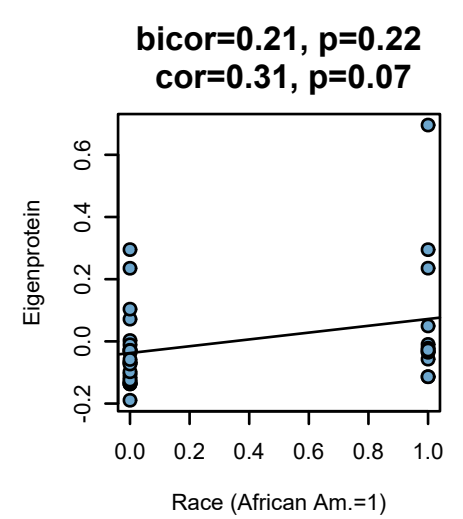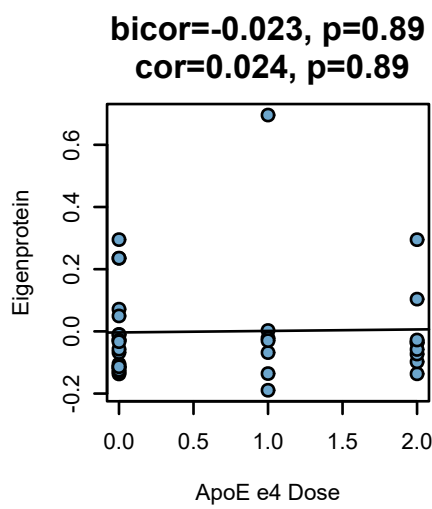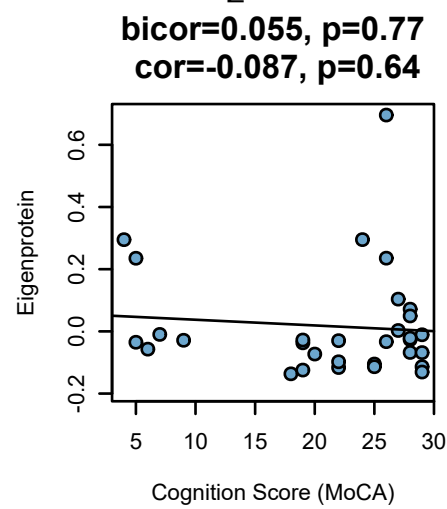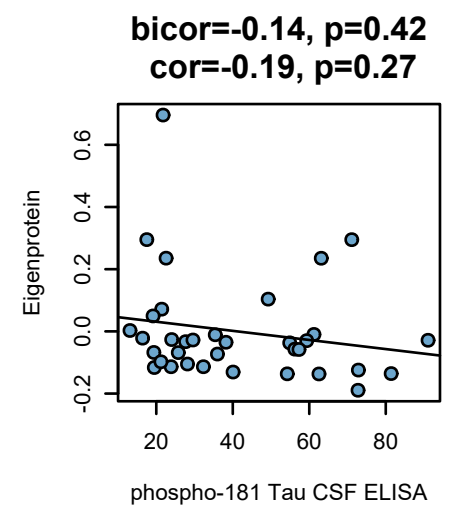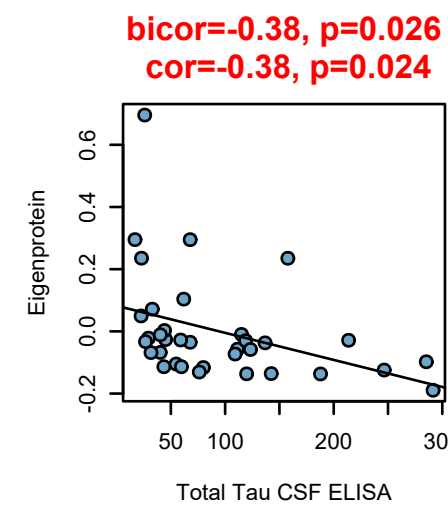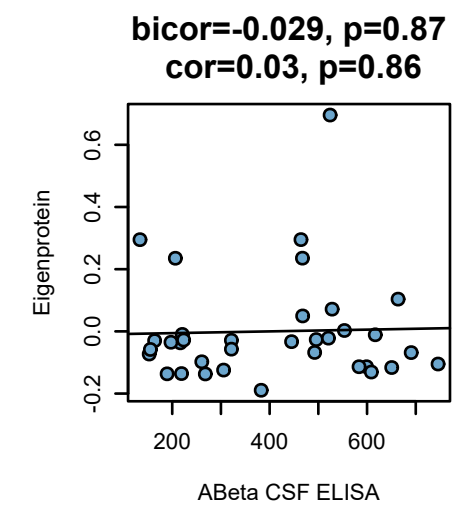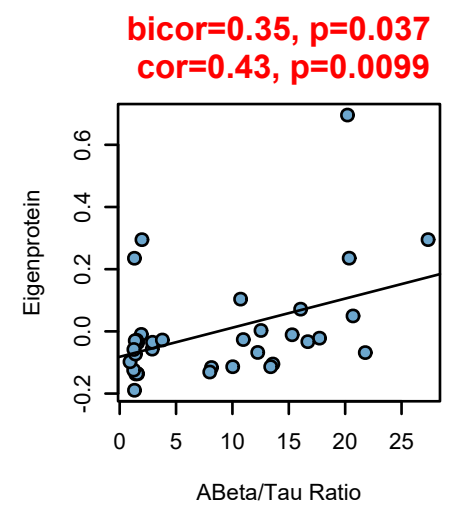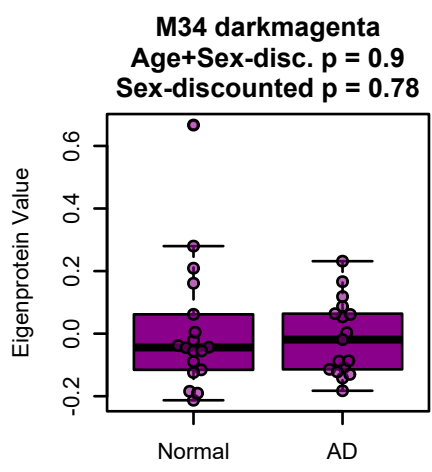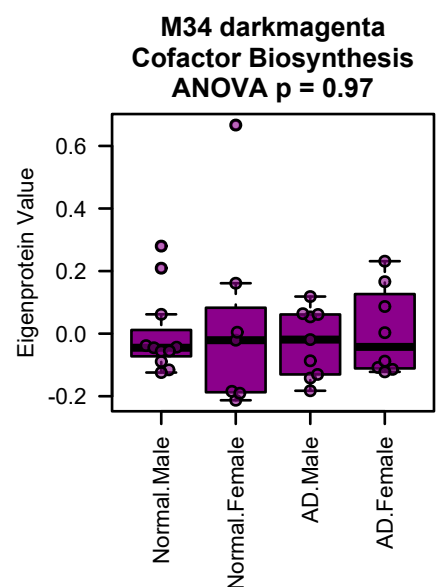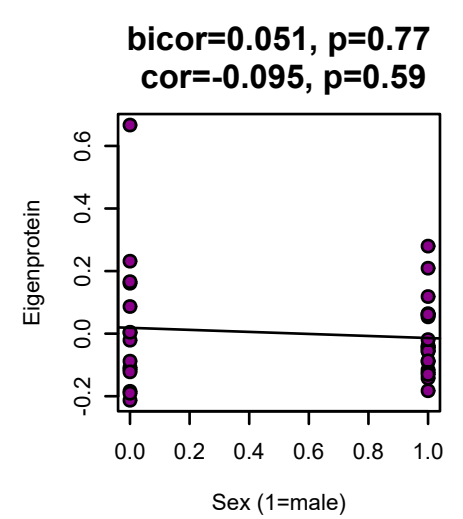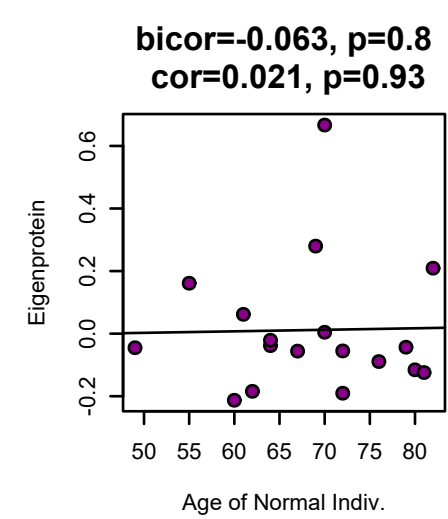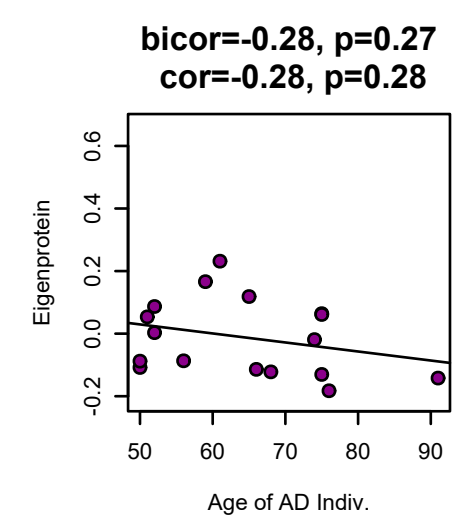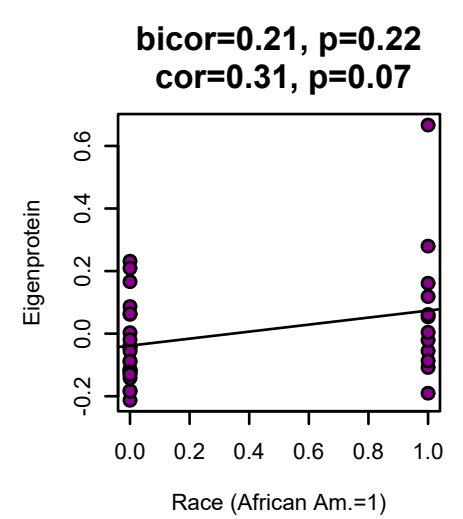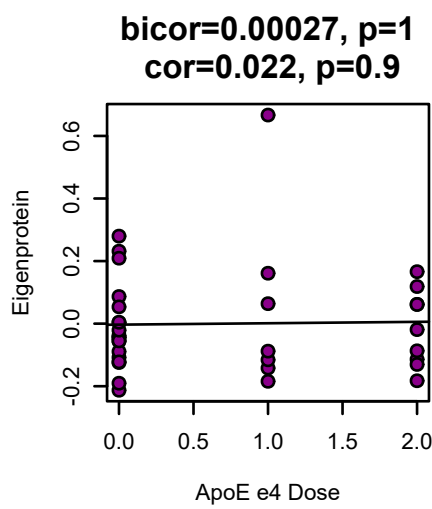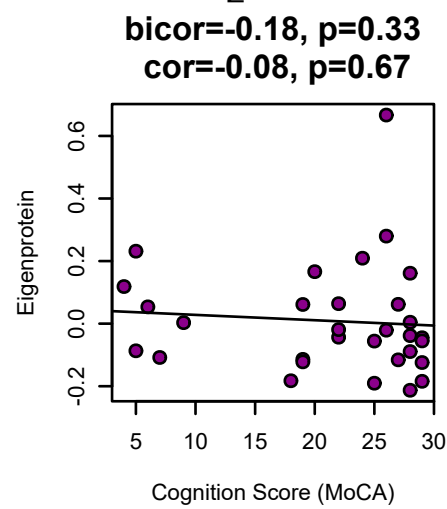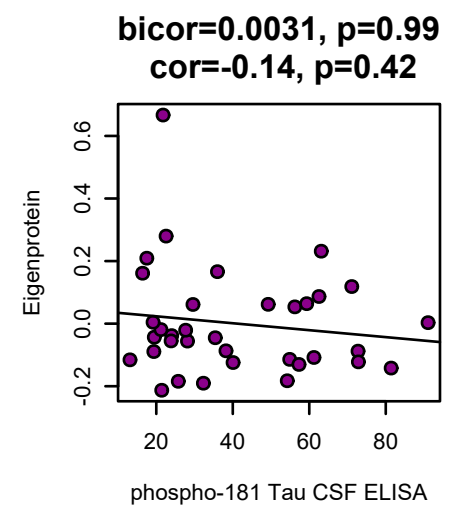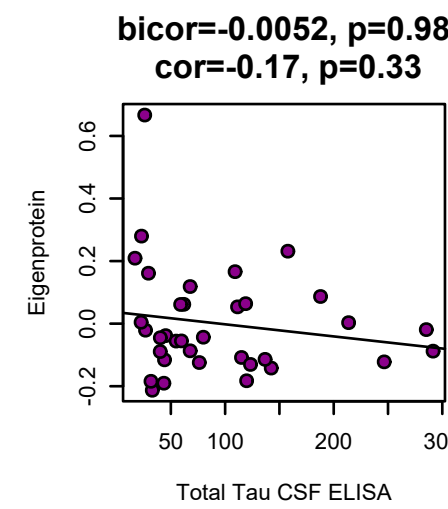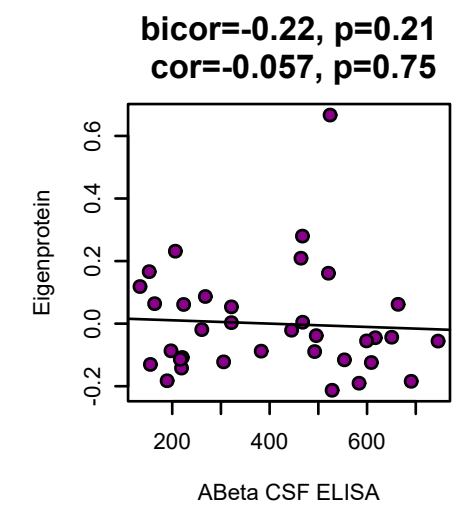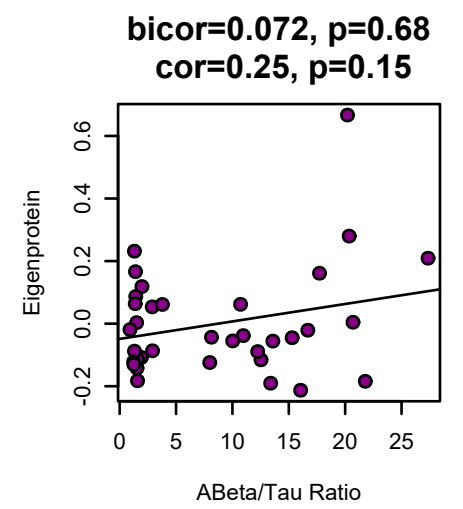

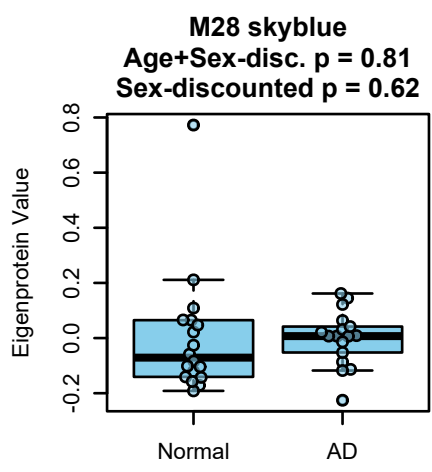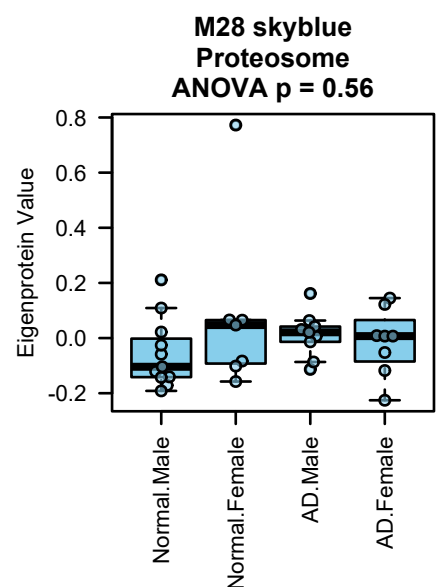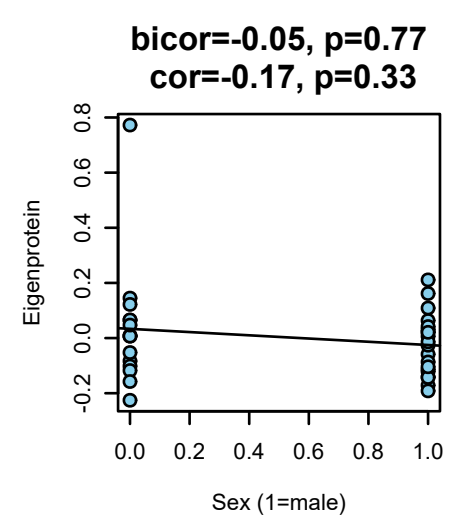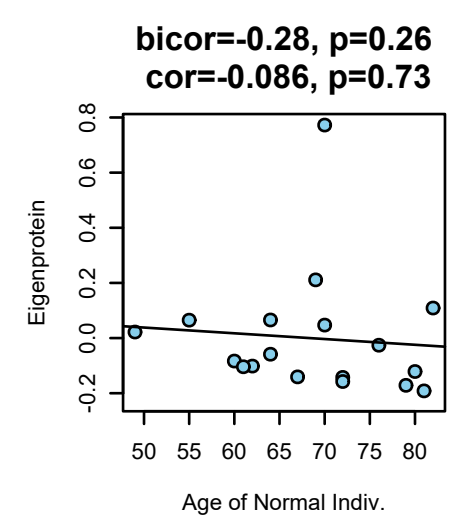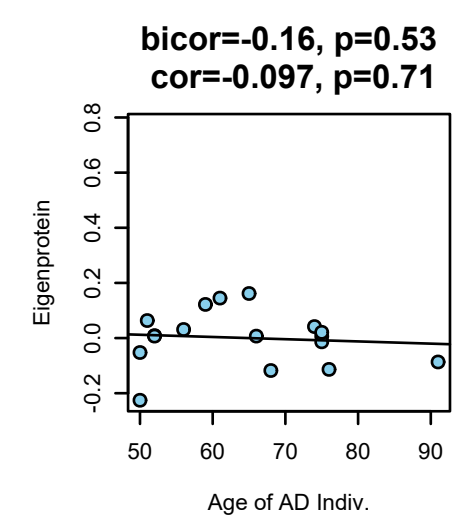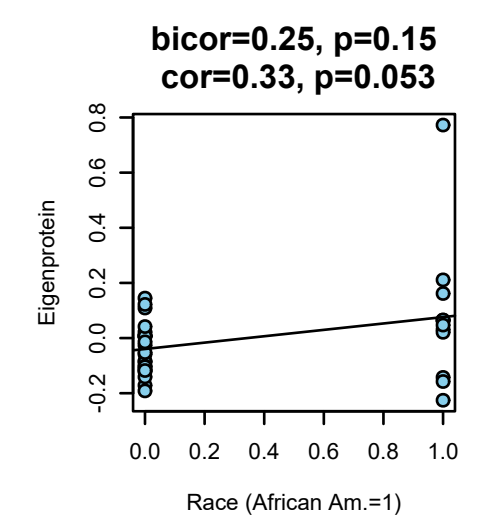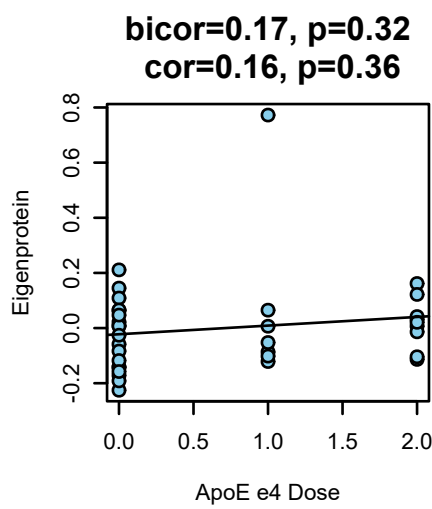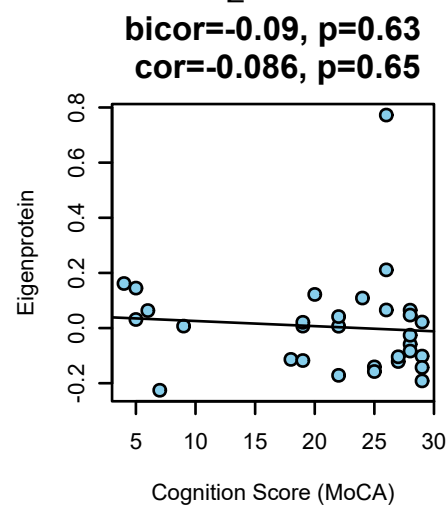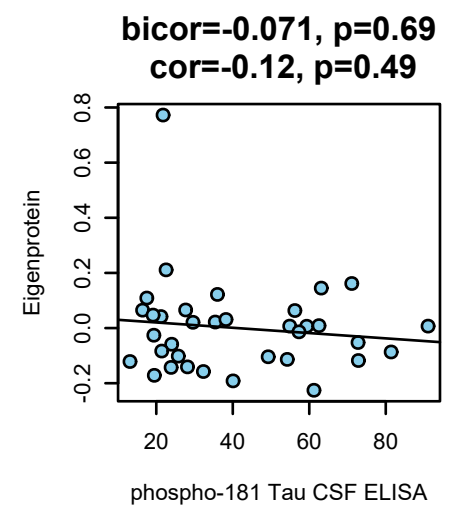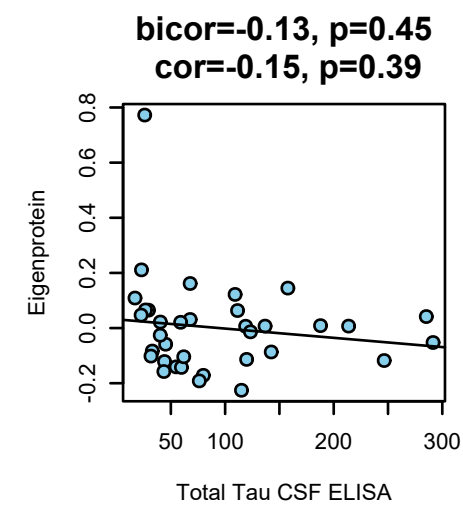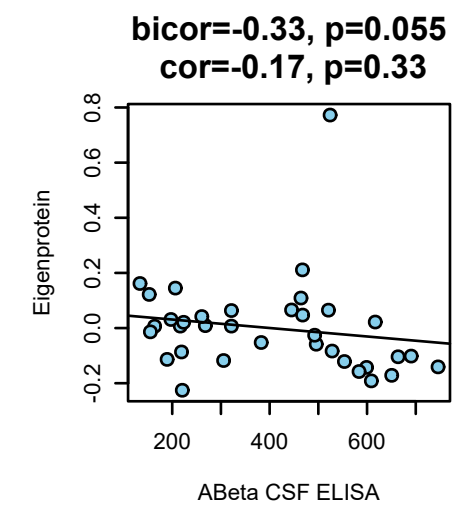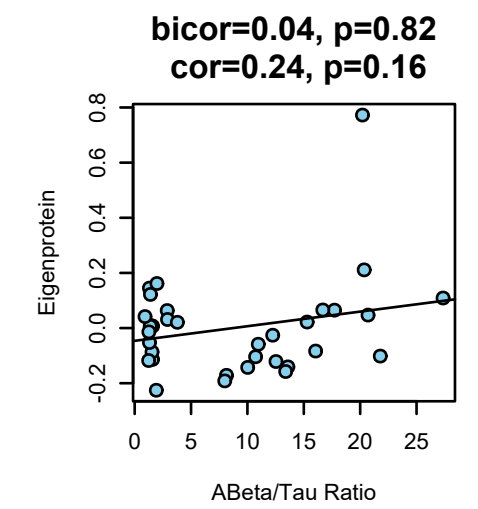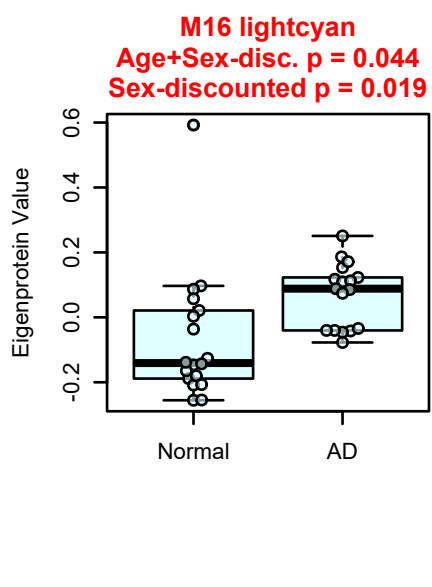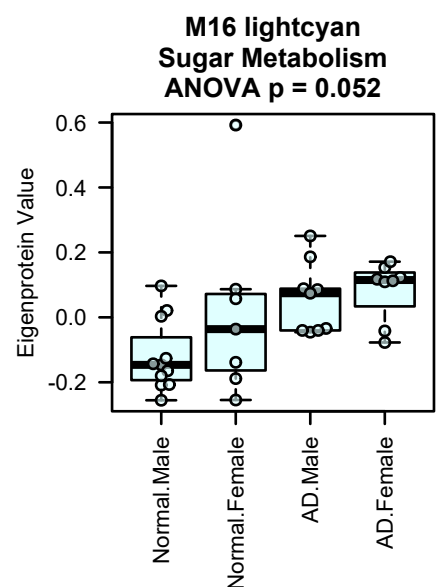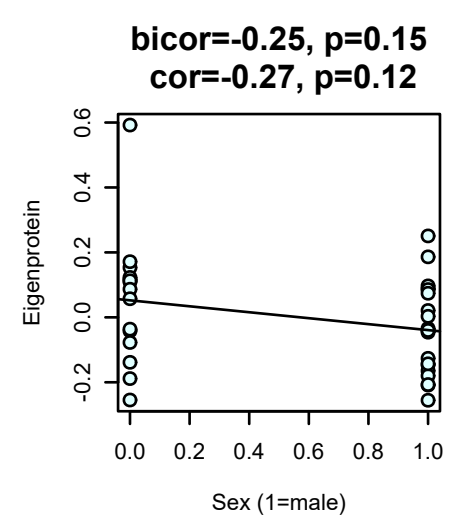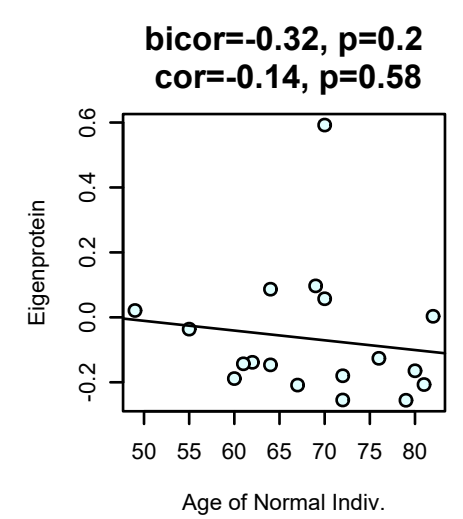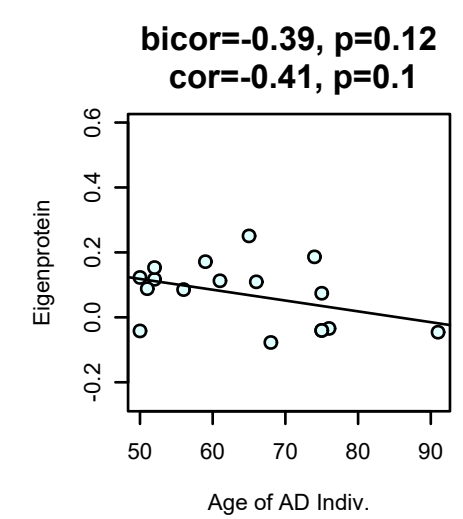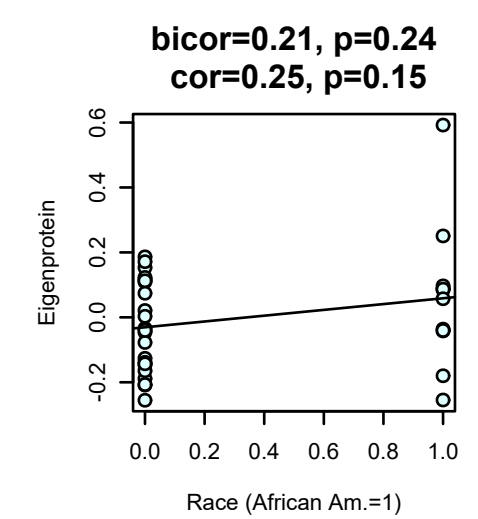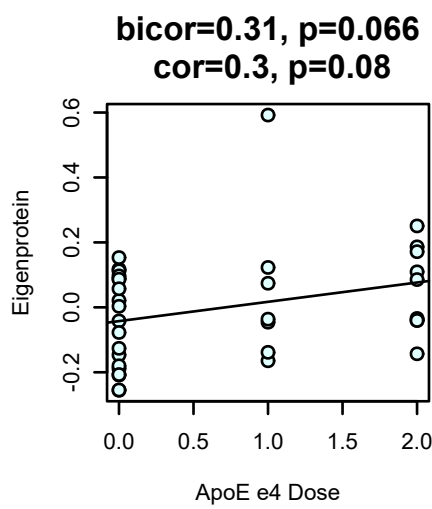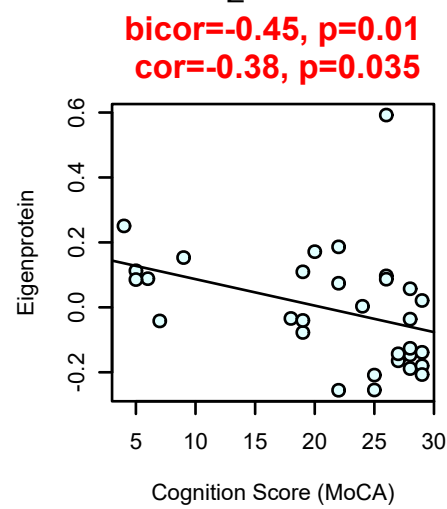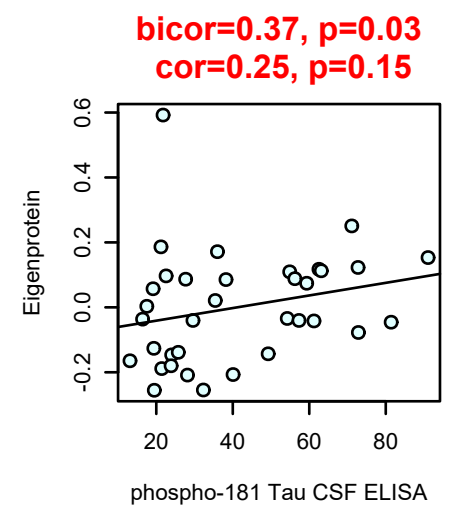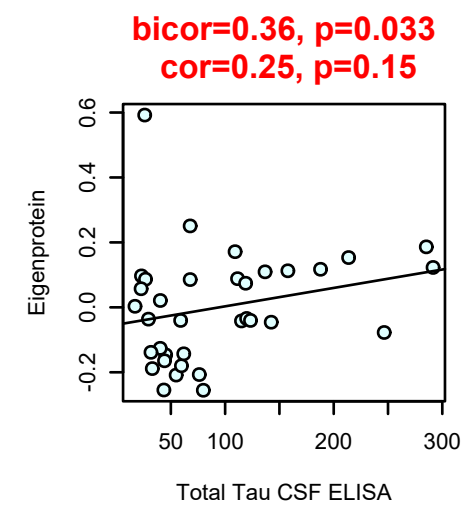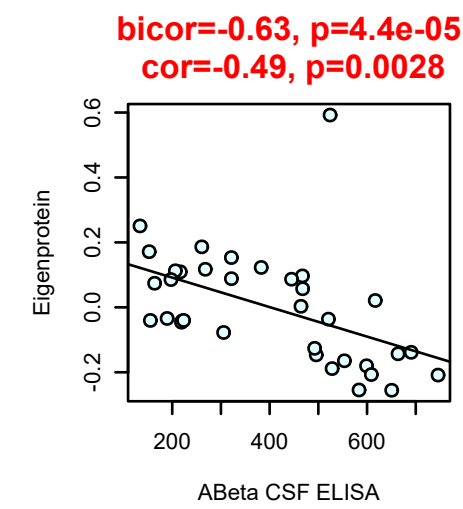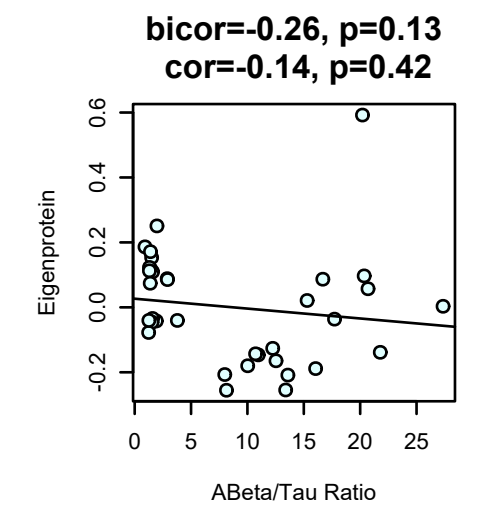

**M29 saddlebrown**  
Age+Sex-disc.  $p = 0.0011$   
Sex-discounted  $p = 0.00031$

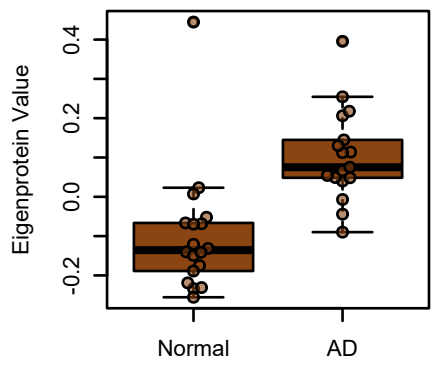

**M29 saddlebrown**  
Sugar Metabolism/Actin Depolymeriz  
ANOVA  $p = 0.0029$

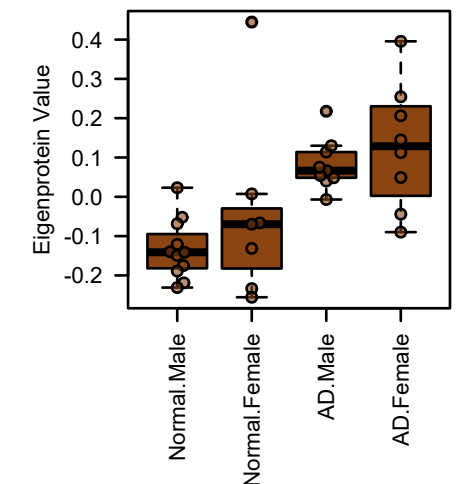

**M29 saddlebrown**  
bicor=-0.22,  $p=0.2$   
cor=-0.25,  $p=0.15$

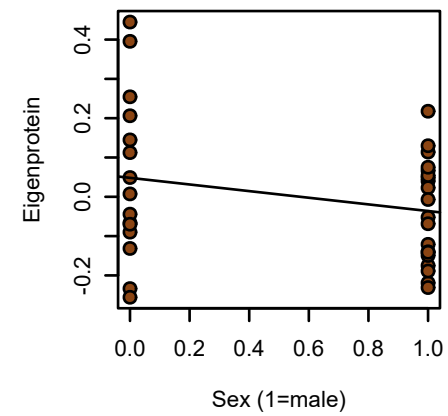

**M29 saddlebrown**  
bicor=-0.32,  $p=0.19$   
cor=-0.13,  $p=0.61$

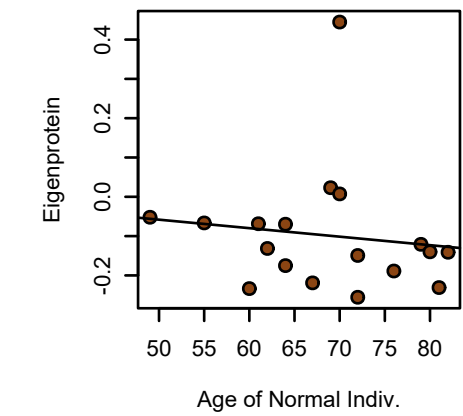

**M29 saddlebrown**  
bicor=-0.17,  $p=0.51$   
cor=-0.24,  $p=0.35$

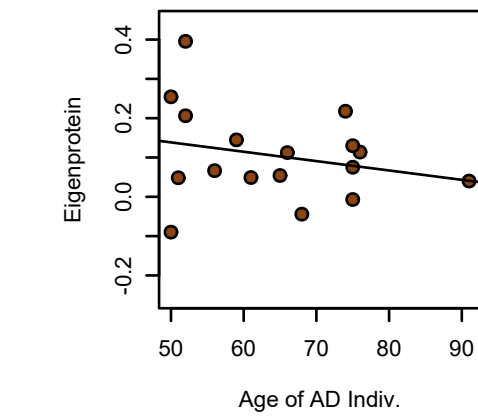

**M29 saddlebrown**  
bicor=0.041,  $p=0.82$   
cor=0.051,  $p=0.77$

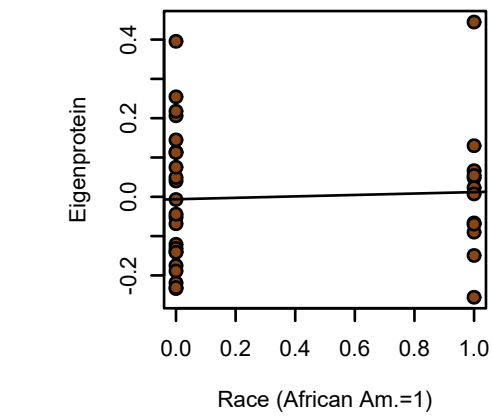

**M29 saddlebrown**  
bicor=0.44,  $p=0.0075$   
cor=0.4,  $p=0.017$

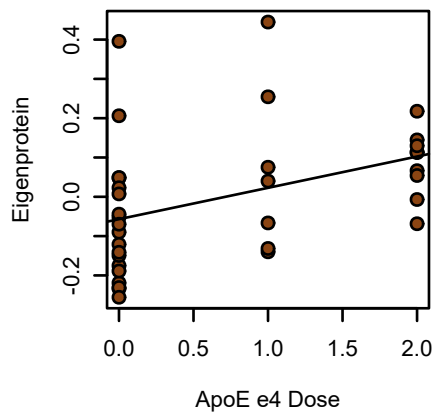

**M29 saddlebrown**  
bicor=-0.64,  $p=1e-04$   
cor=-0.43,  $p=0.016$

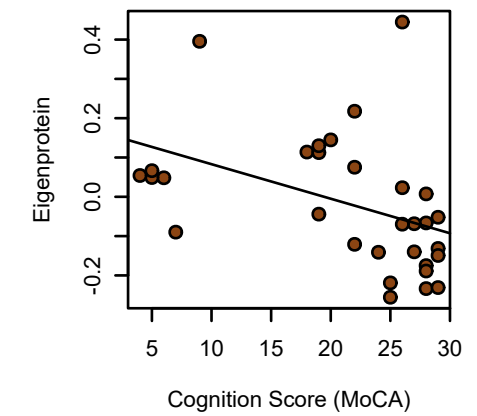

**M29 saddlebrown**  
bicor=0.45,  $p=0.0071$   
cor=0.45,  $p=0.0067$

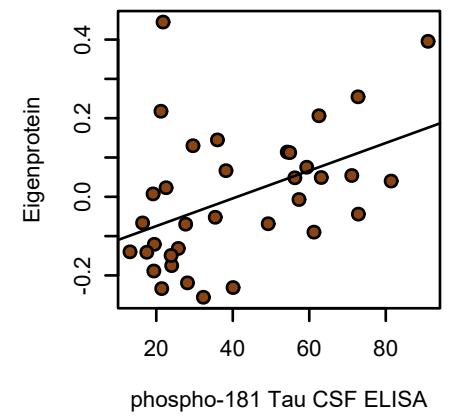

**M29 saddlebrown**  
bicor=0.54,  $p=0.00086$   
cor=0.53,  $p=0.0011$

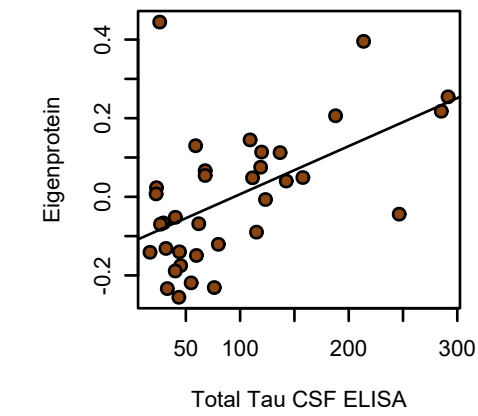

**M29 saddlebrown**  
bicor=-0.6,  $p=0.00014$   
cor=-0.55,  $p=0.00062$

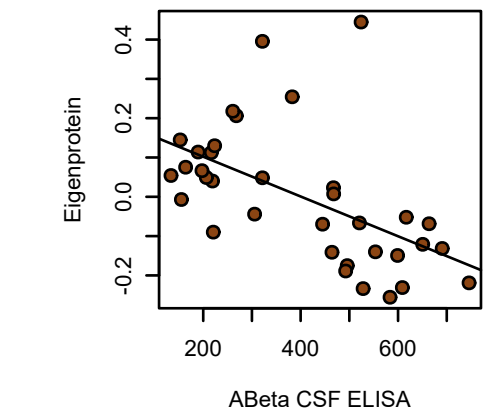

**M29 saddlebrown**  
bicor=-0.48,  $p=0.0035$   
cor=-0.41,  $p=0.014$

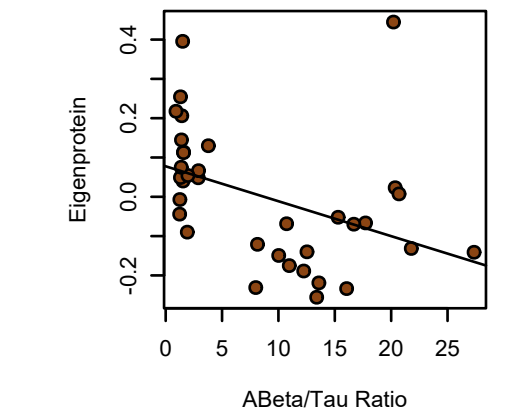

**M24 darkgrey**  
Age+Sex-disc.  $p = 0.016$   
Sex-discounted  $p = 0.0075$

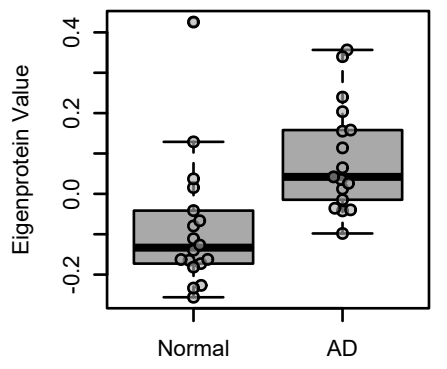

**M24 darkgrey**  
Ubiquitination  
ANOVA  $p = 0.021$

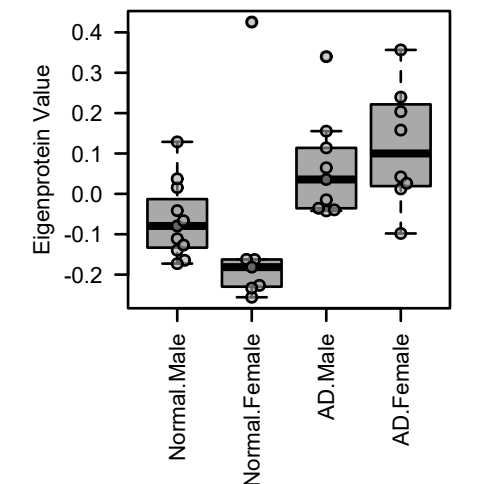

**M24 darkgrey**  
bicor=-0.0016,  $p=0.99$   
cor=-0.049,  $p=0.78$

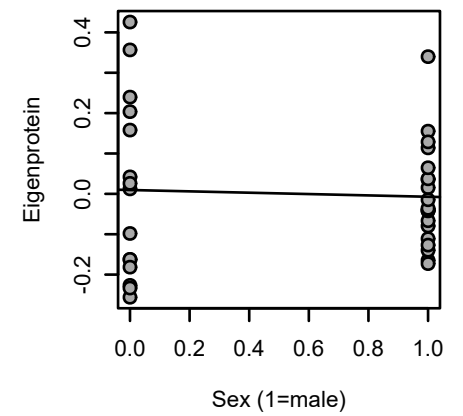

**M24 darkgrey**  
bicor=0.38,  $p=0.12$   
cor=0.23,  $p=0.36$

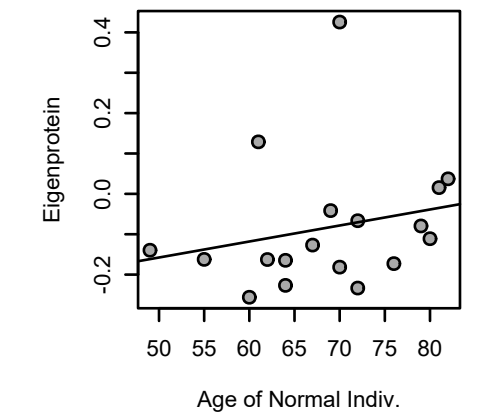

**M24 darkgrey**  
bicor=0.049,  $p=0.85$   
cor=0.042,  $p=0.87$

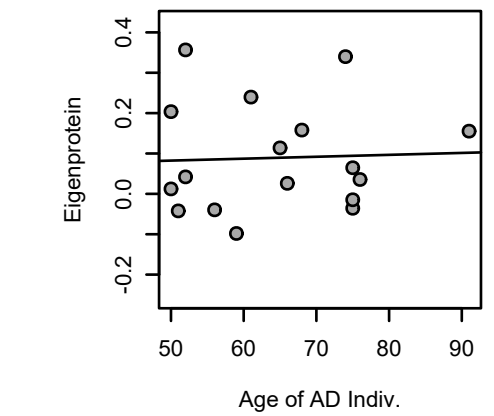

**M24 darkgrey**  
bicor=-0.2,  $p=0.25$   
cor=-0.16,  $p=0.36$

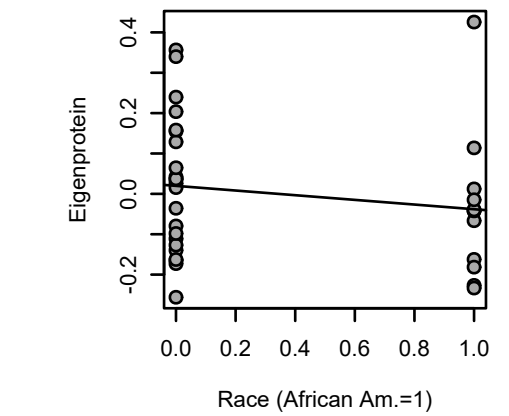

**M24 darkgrey**  
bicor=0.31,  $p=0.069$   
cor=0.28,  $p=0.1$

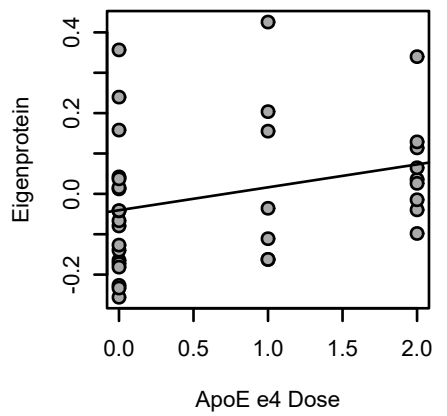

**M24 darkgrey**  
bicor=-0.54,  $p=0.0015$   
cor=-0.43,  $p=0.016$

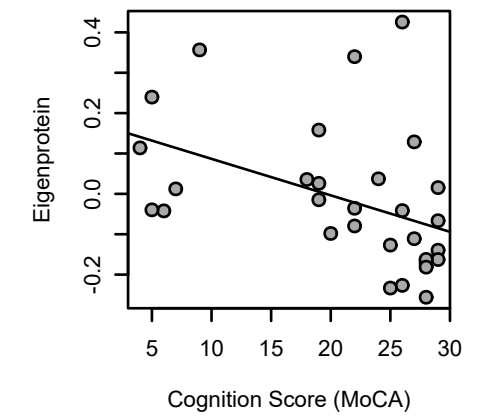

**M24 darkgrey**  
bicor=0.62,  $p=6.7e-05$   
cor=0.54,  $p=0.00081$

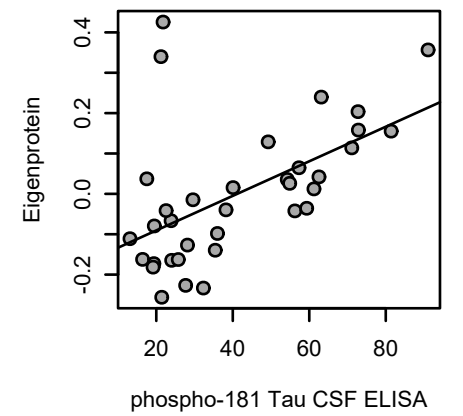

**M24 darkgrey**  
bicor=0.68,  $p=6.1e-06$   
cor=0.64,  $p=3.5e-05$

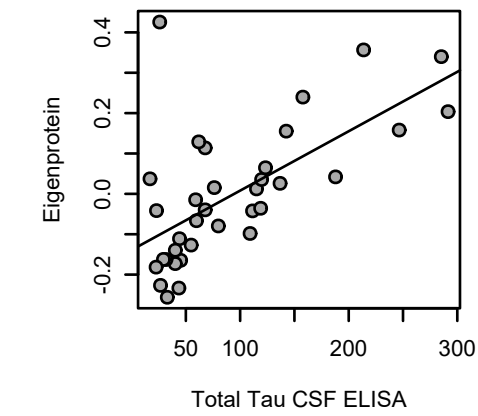

**M24 darkgrey**  
bicor=-0.48,  $p=0.0038$   
cor=-0.39,  $p=0.021$

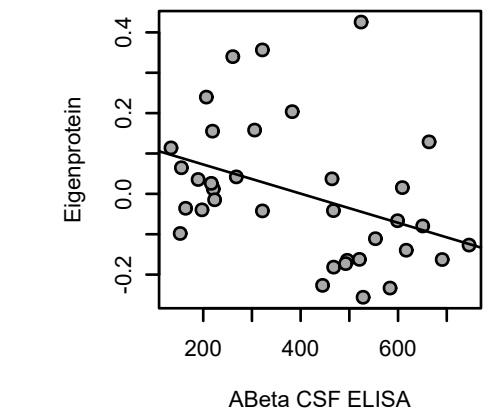

**M24 darkgrey**  
bicor=-0.51,  $p=0.0017$   
cor=-0.43,  $p=0.0099$

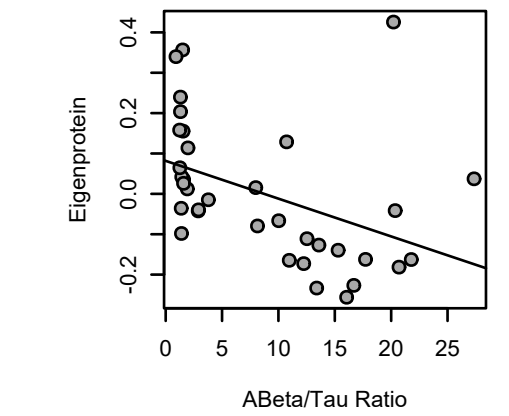

**M35 sienna3**  
Age+Sex-disc.  $p = 0.21$   
Sex-discounted  $p = 0.13$

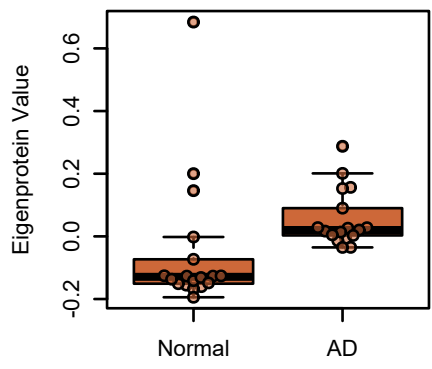

**M35 sienna3**  
Ambiguous  
ANOVA  $p = 0.35$

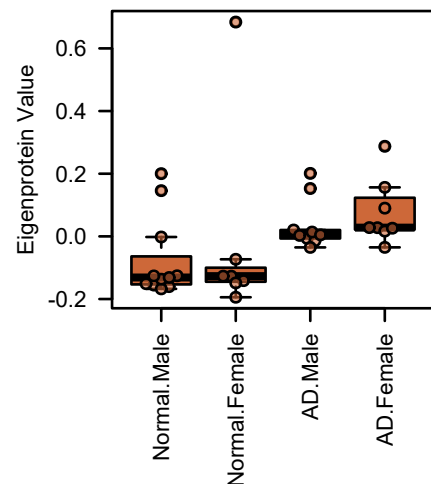

**bicor=-0.096, p=0.58**  
**cor=-0.16, p=0.36**

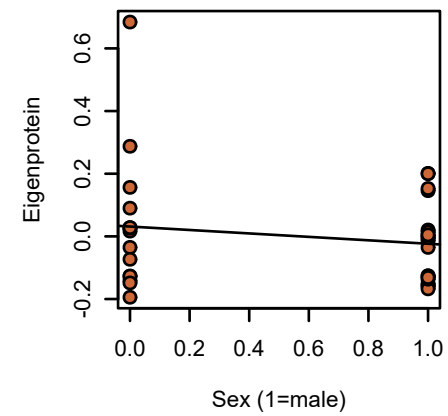

**bicor=-0.037, p=0.88**  
**cor=0.15, p=0.55**

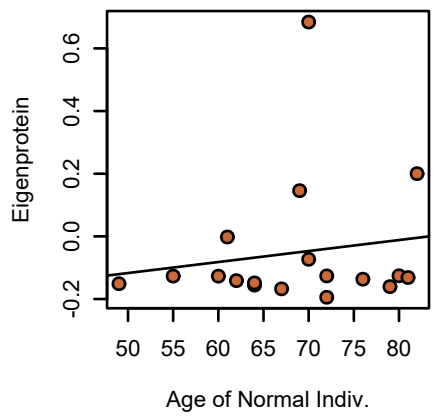

**bicor=-0.18, p=0.48**  
**cor=-0.14, p=0.59**

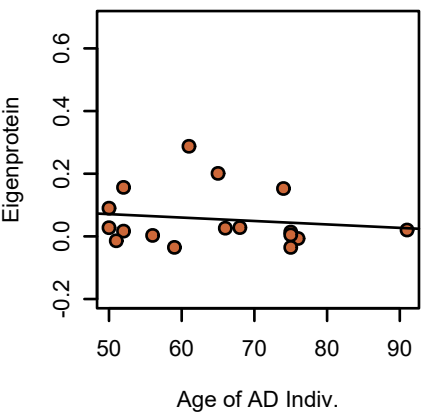

**bicor=0.03, p=0.87**  
**cor=0.12, p=0.49**

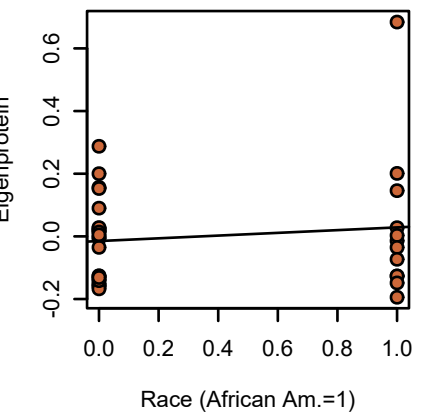

**bicor=0.25, p=0.16**  
**cor=0.21, p=0.23**

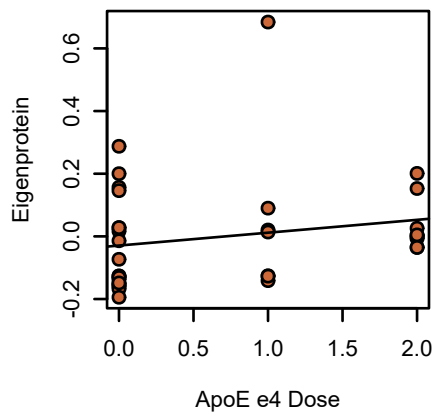

**bicor=-0.57, p=0.00077**  
**cor=-0.37, p=0.04**

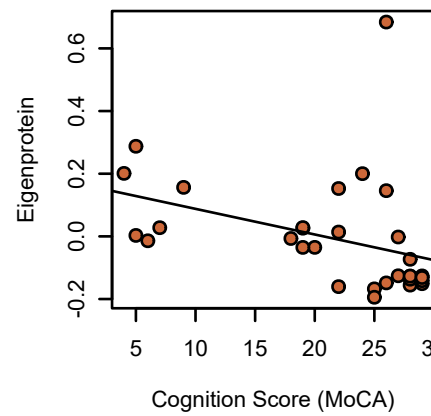

**bicor=0.41, p=0.014**  
**cor=0.27, p=0.12**

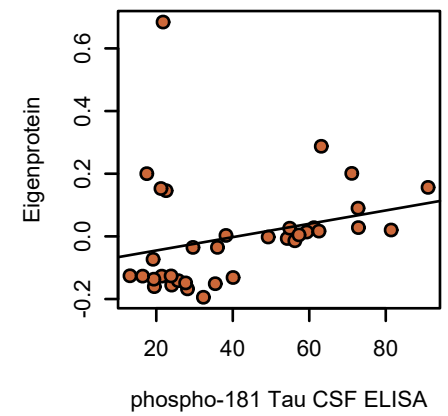

**bicor=0.38, p=0.024**  
**cor=0.25, p=0.15**

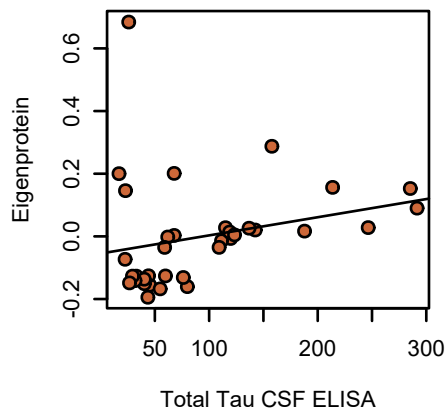

**bicor=-0.52, p=0.0014**  
**cor=-0.36, p=0.034**

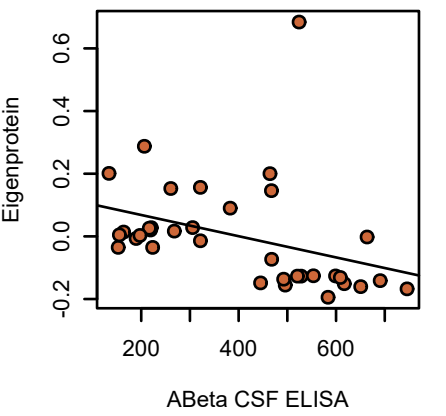

**bicor=-0.29, p=0.087**  
**cor=-0.079, p=0.65**

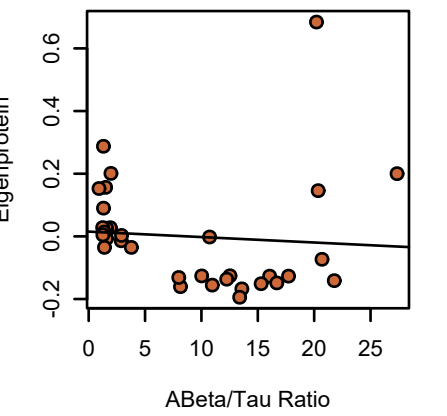

**M33 darkolivegreen**  
Age+Sex-disc.  $p = 0.5$   
Sex-discounted  $p = 0.82$

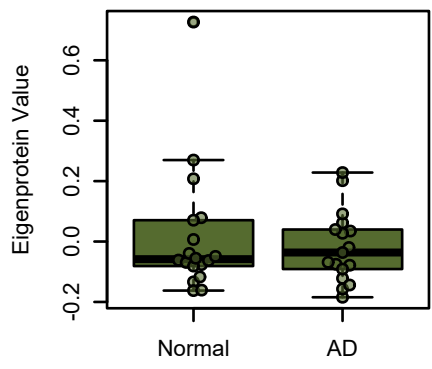

**M33 darkolivegreen**  
Translation/Sugar Binding  
ANOVA  $p = 0.61$

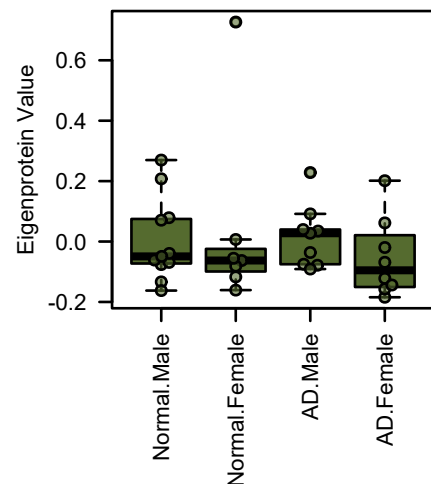

**bicor=0.32, p=0.063**  
**cor=0.06, p=0.73**

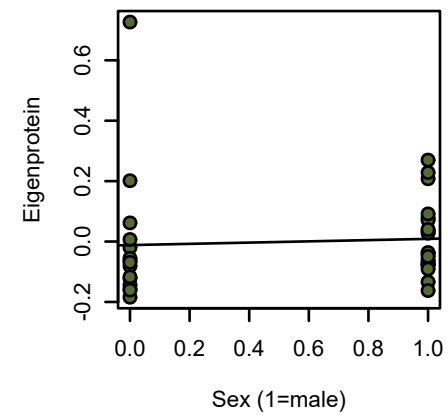

**bicor=0.25, p=0.32**  
**cor=0.21, p=0.4**

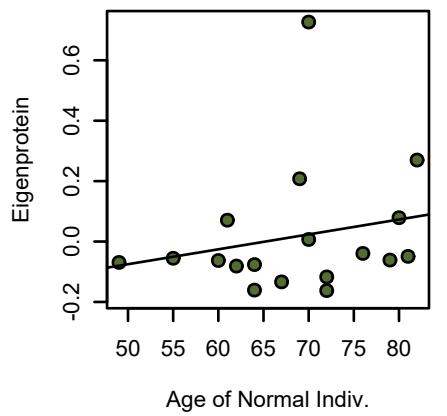

**bicor=0.37, p=0.15**  
**cor=0.33, p=0.2**

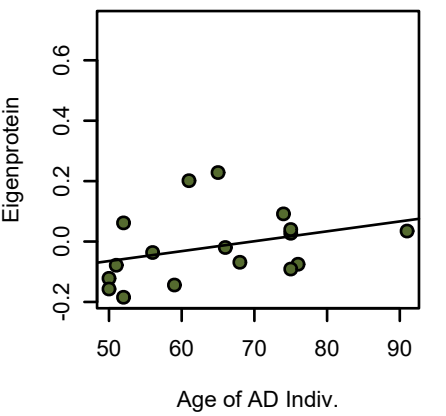

**bicor=-0.038, p=0.83**  
**cor=0.17, p=0.33**

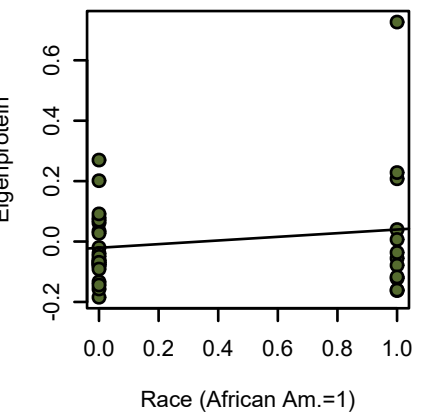

**bicor=0.22, p=0.2**  
**cor=0.16, p=0.36**

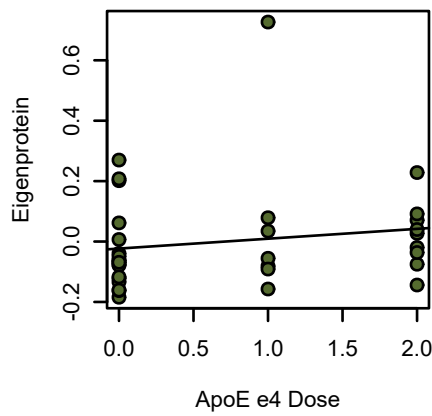

**bicor=-0.19, p=0.3**  
**cor=-0.09, p=0.63**

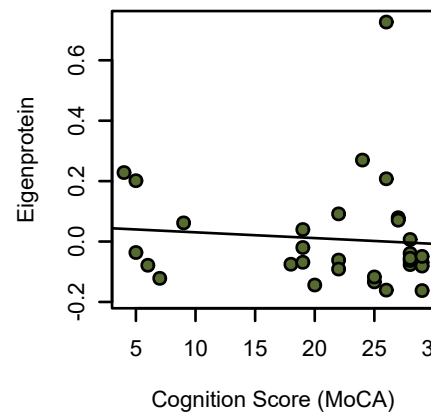

**bicor=0.065, p=0.71**  
**cor=-0.11, p=0.53**

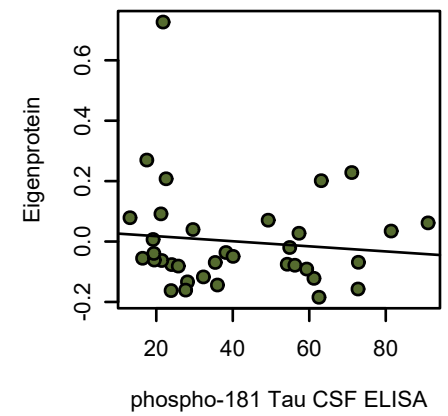

**bicor=0.021, p=0.91**  
**cor=-0.18, p=0.3**

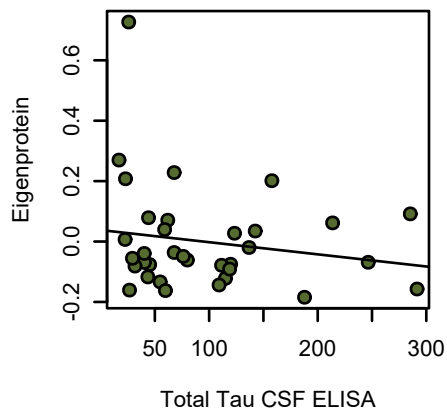

**bicor=-0.23, p=0.19**  
**cor=-0.034, p=0.85**

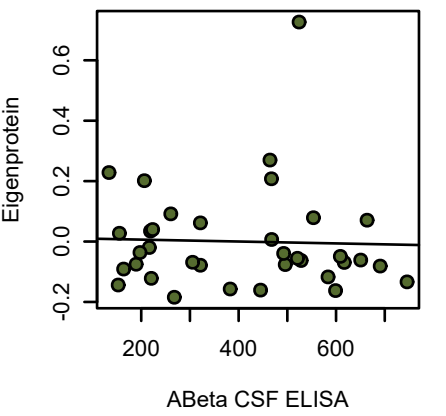

**bicor=0.071, p=0.68**  
**cor=0.28, p=0.1**

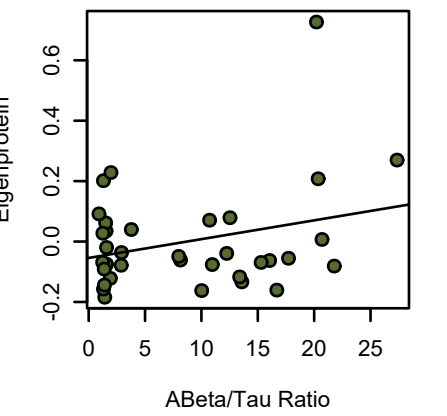

**M36 yellowgreen**  
Age+Sex-disc.  $p = 0.2$   
Sex-discounted  $p = 0.53$

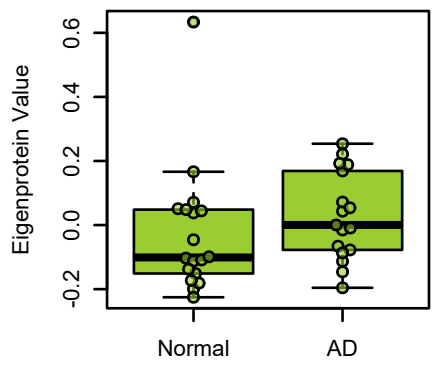

**M36 yellowgreen**  
Organelle Organization/Biogenesis  
ANOVA  $p = 0.31$

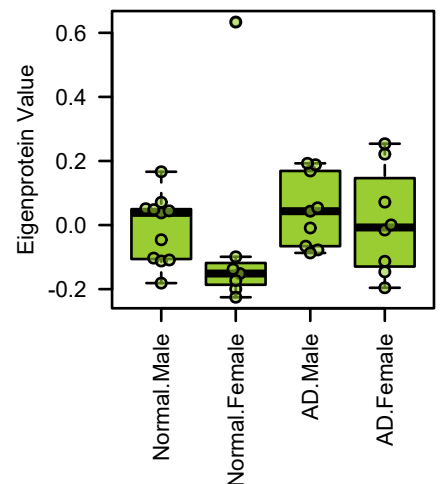

**bicor=0.27, p=0.12**  
**cor=0.094, p=0.59**

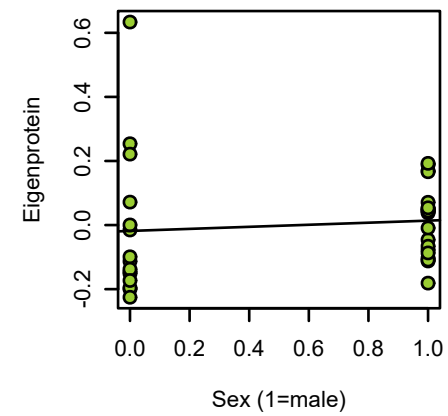

**bicor=0.53, p=0.024**  
**cor=0.36, p=0.14**

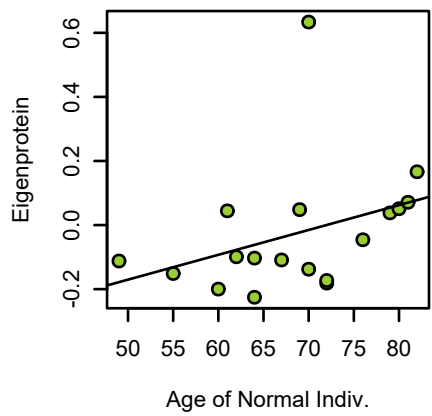

**bicor=0.35, p=0.17**  
**cor=0.34, p=0.18**

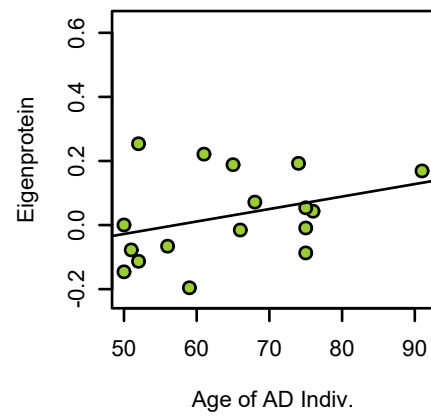

**bicor=-0.3, p=0.081**  
**cor=-0.11, p=0.53**

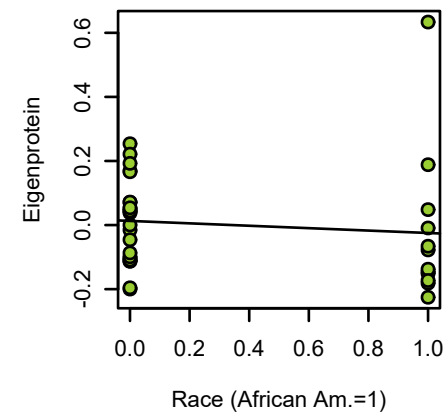

**bicor=0.23, p=0.19**  
**cor=0.2, p=0.25**

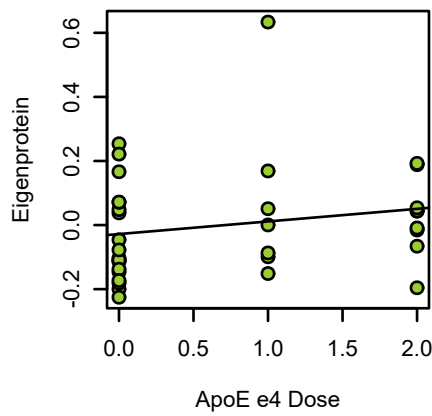

**bicor=-0.39, p=0.03**  
**cor=-0.23, p=0.21**

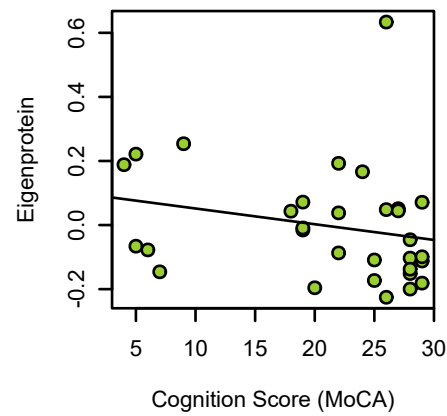

**bicor=0.34, p=0.046**  
**cor=0.23, p=0.18**

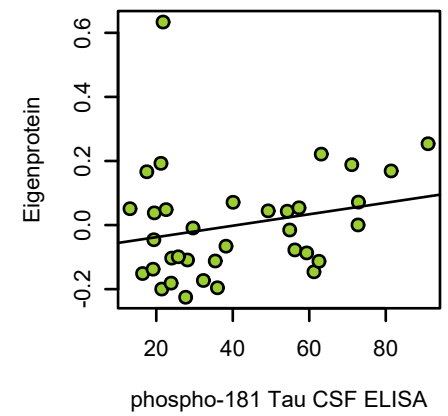

**bicor=0.37, p=0.031**  
**cor=0.23, p=0.18**

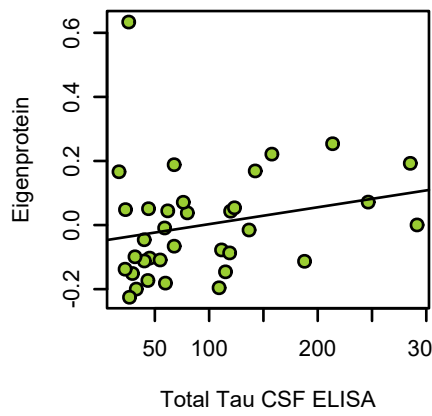

**bicor=-0.26, p=0.13**  
**cor=-0.15, p=0.39**

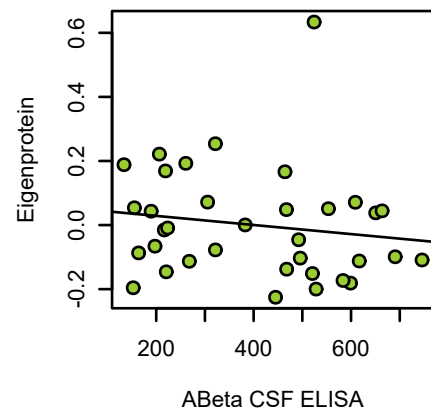

**bicor=-0.28, p=0.1**  
**cor=-0.065, p=0.71**

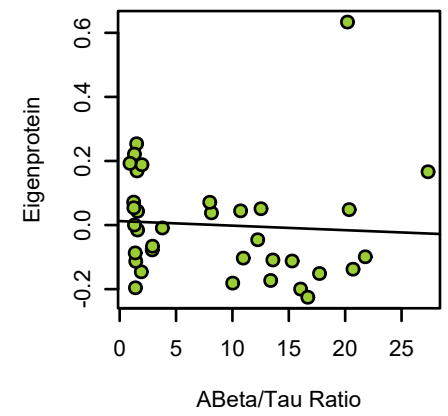

**M1 turquoise**  
Age+Sex-disc.  $p = 0.0043$   
Sex-discounted  $p = 0.057$

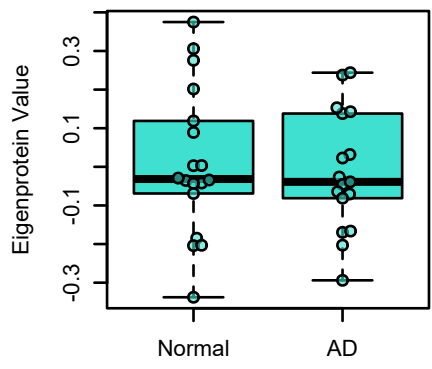

**M1 turquoise**  
Immune Response  
ANOVA  $p = 0.0045$

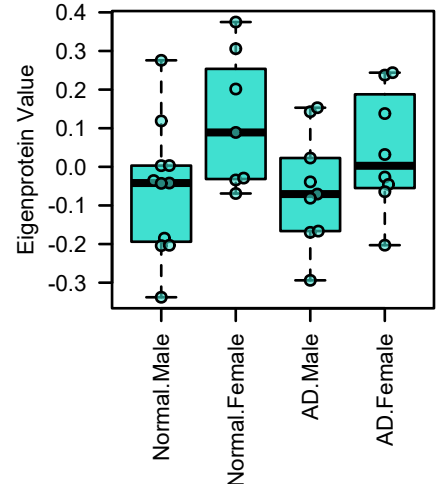

**bicor=-0.38, p=0.024**  
**cor=-0.39, p=0.021**

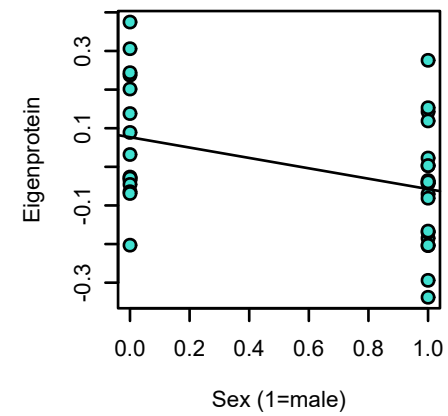

**bicor=-0.44, p=0.067**  
**cor=-0.45, p=0.061**

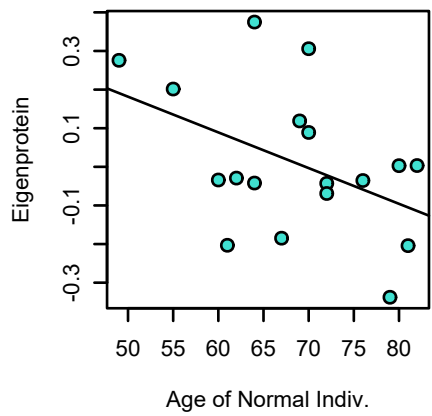

**bicor=-0.7, p=0.0017**  
**cor=-0.71, p=0.0014**

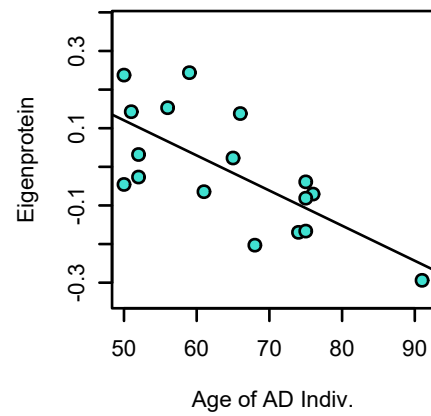

**bicor=0.53, p=0.0011**  
**cor=0.53, p=0.0011**

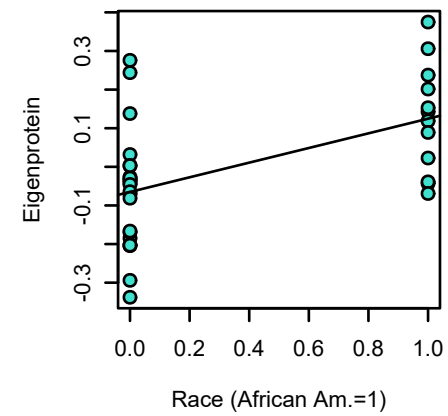

**bicor=-0.057, p=0.75**  
**cor=-0.067, p=0.7**

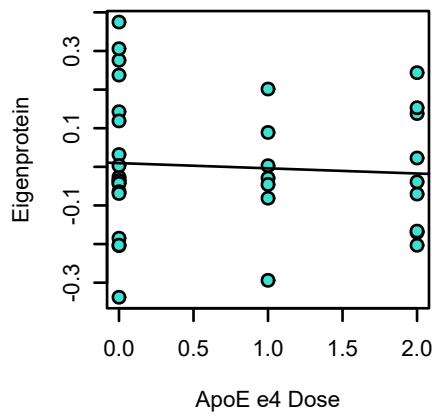

**bicor=-0.019, p=0.92**  
**cor=-0.094, p=0.61**

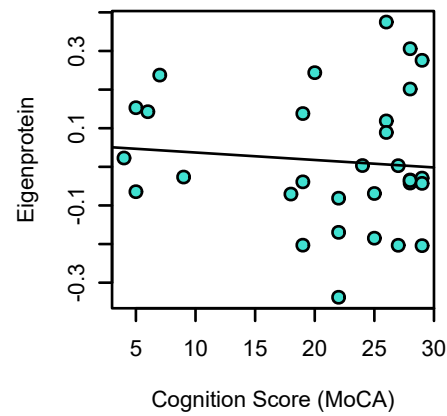

**bicor=-0.14, p=0.43**  
**cor=-0.2, p=0.25**

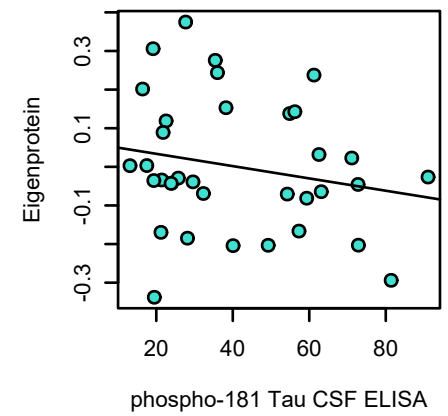

**bicor=-0.25, p=0.15**  
**cor=-0.32, p=0.061**

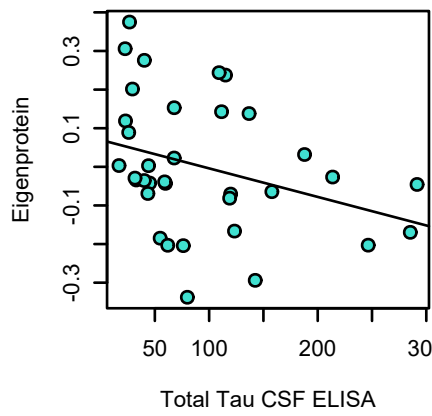

**bicor=-0.17, p=0.34**  
**cor=-0.12, p=0.49**

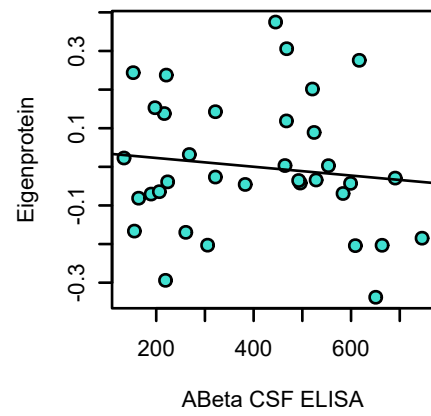

**bicor=0.28, p=0.11**  
**cor=0.28, p=0.1**

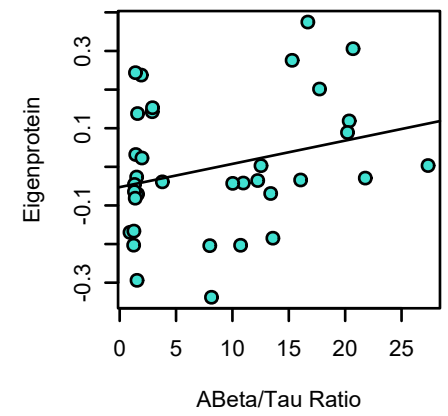

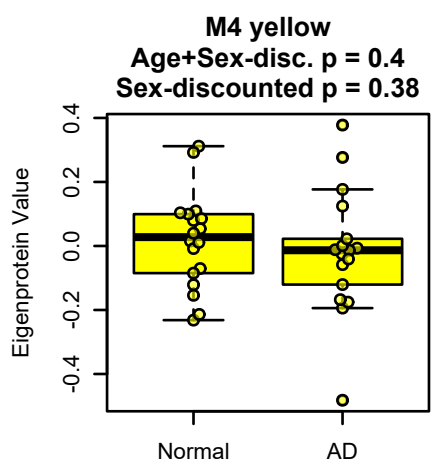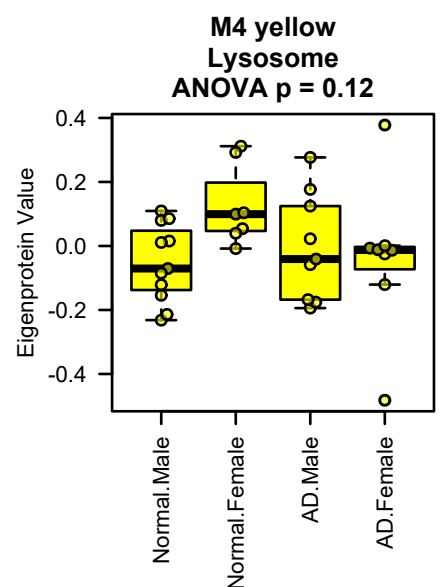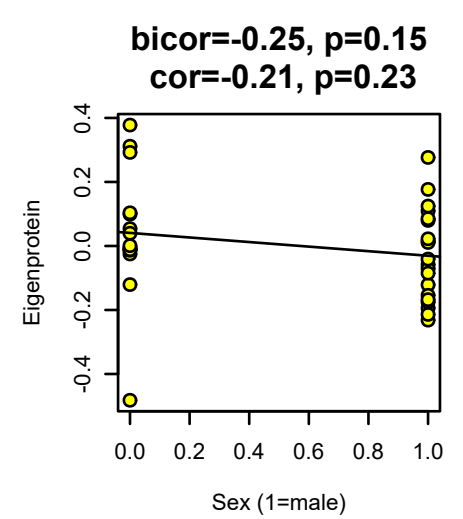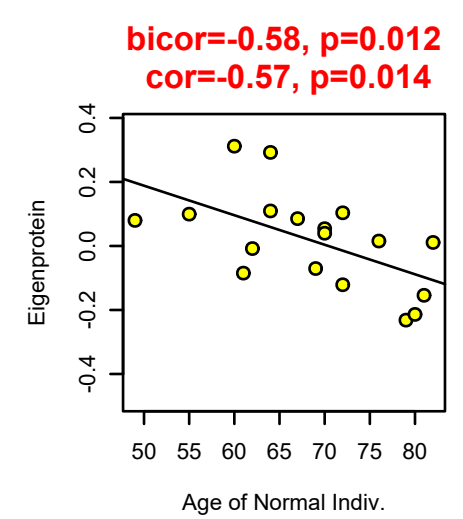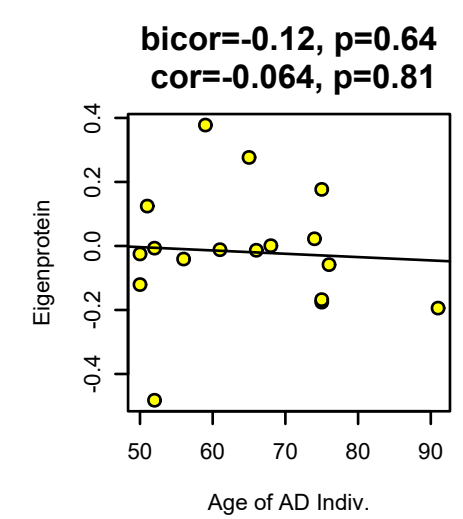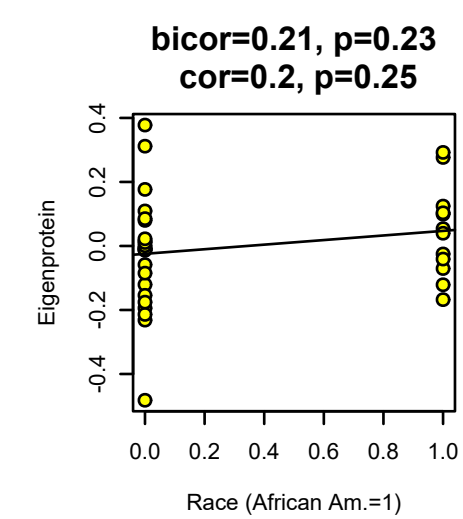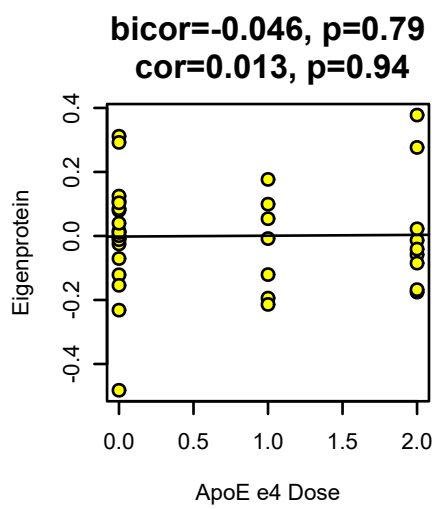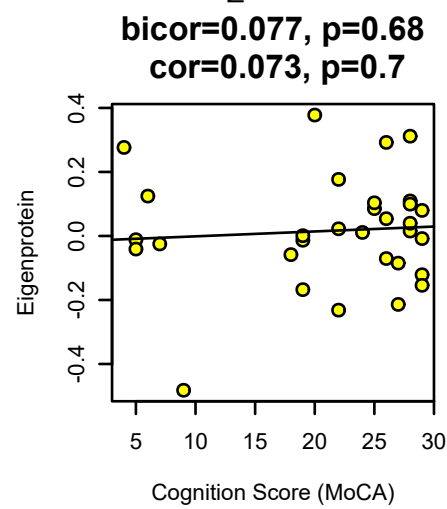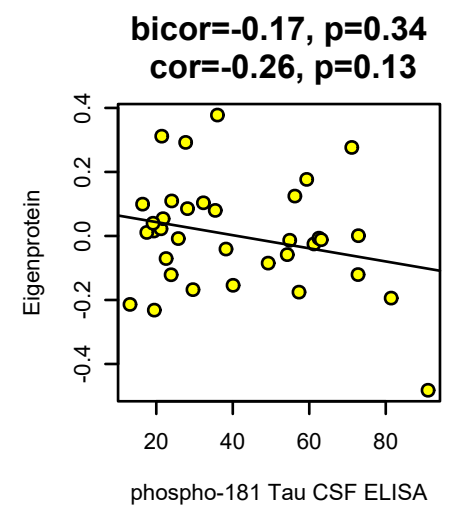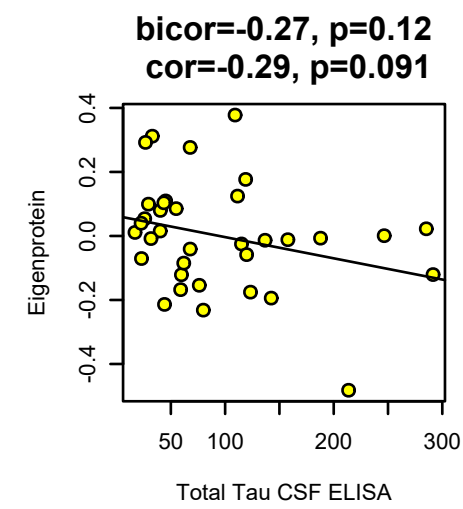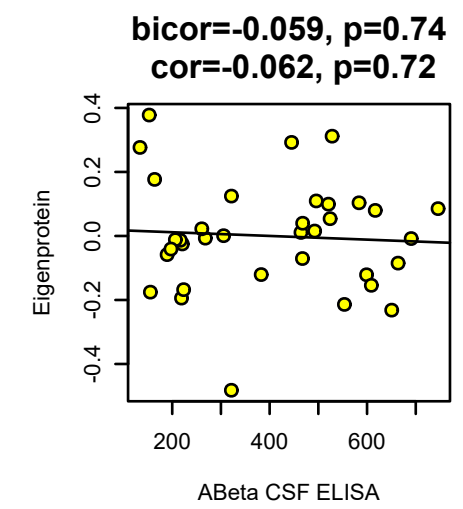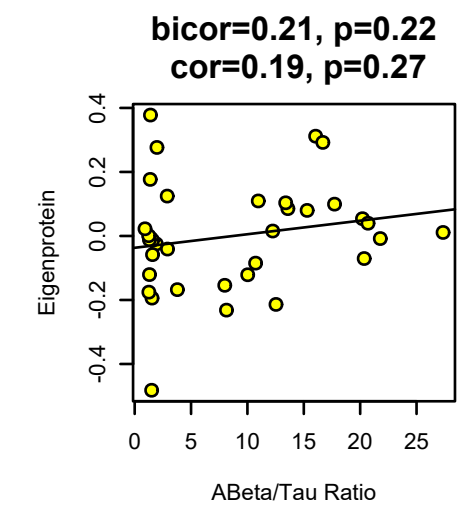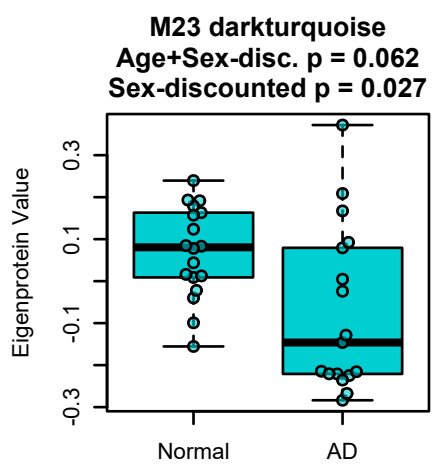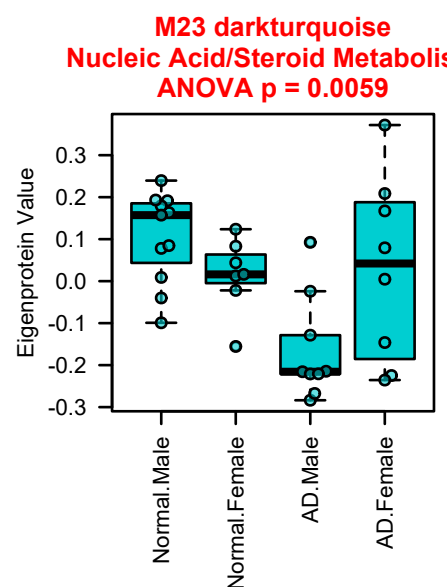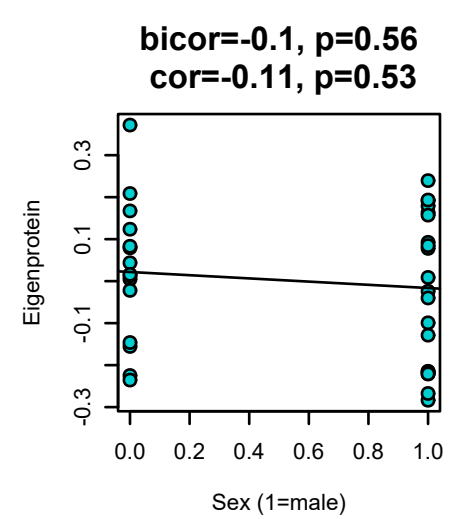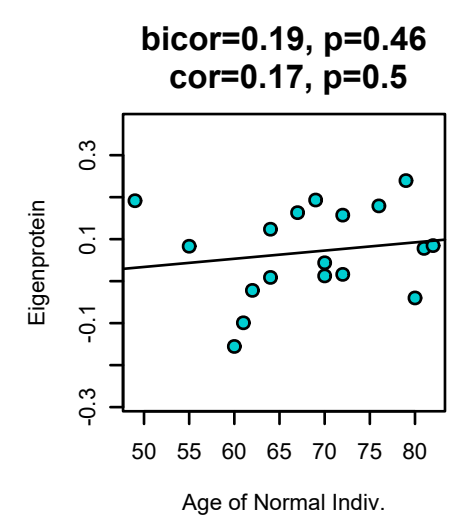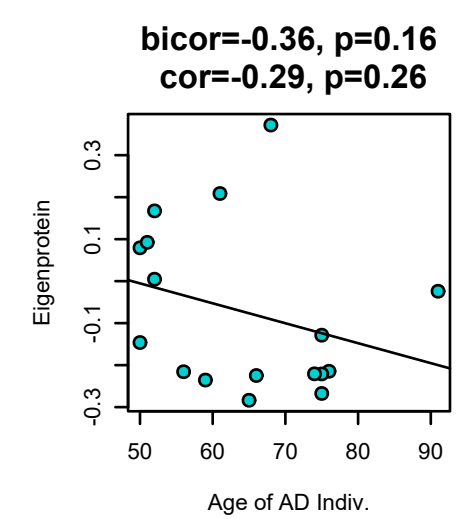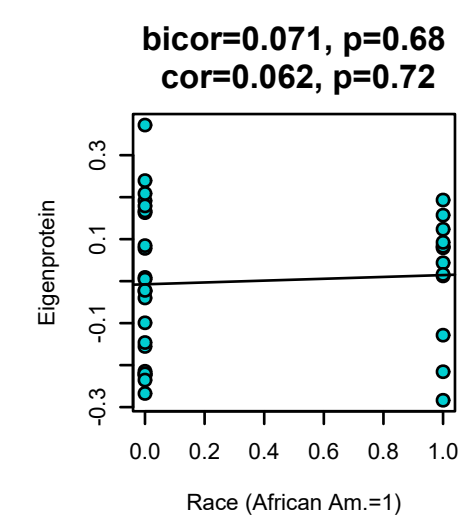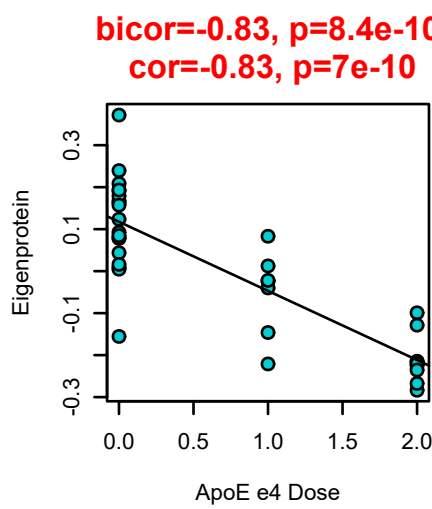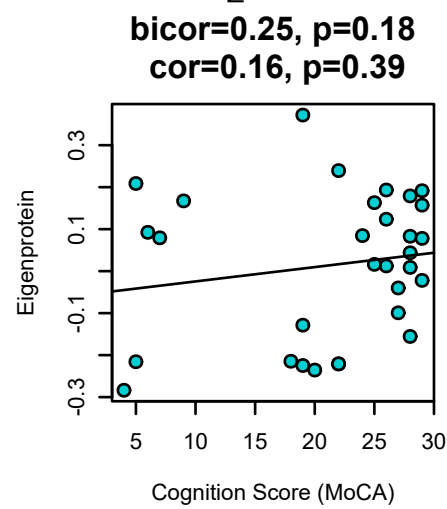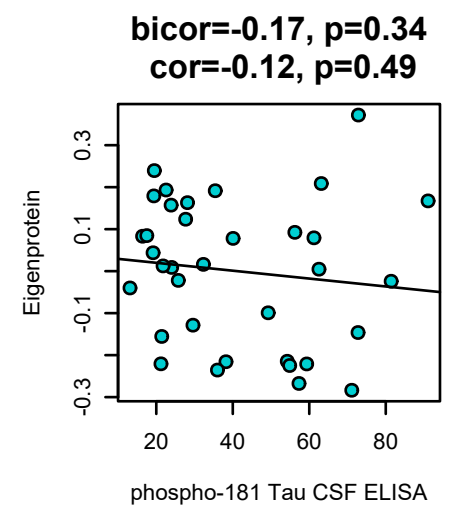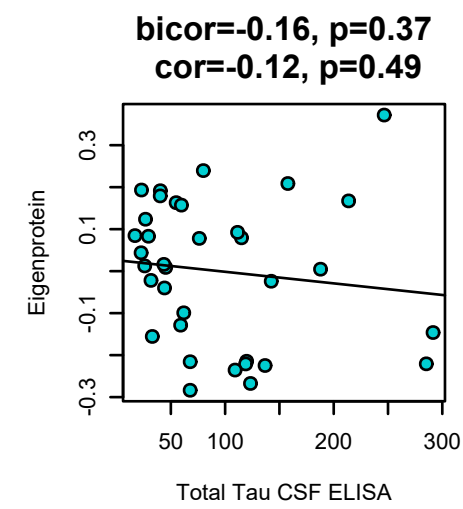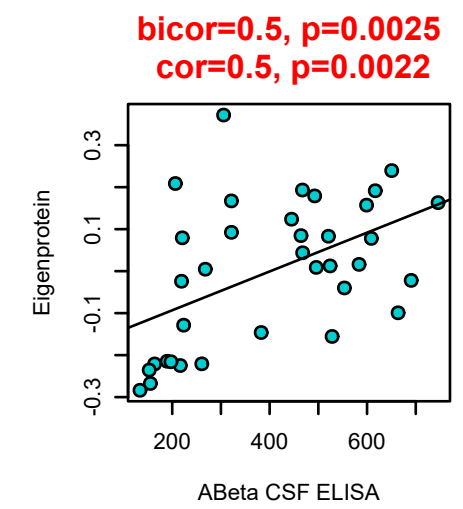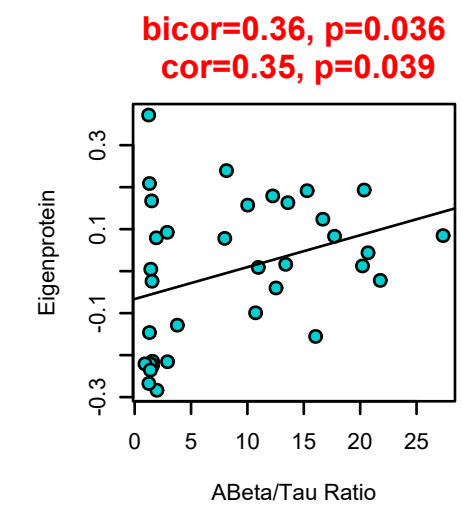



**M20 royalblue**  
Age+Sex-disc.  $p = 0.029$   
Sex-discounted  $p = 0.02$

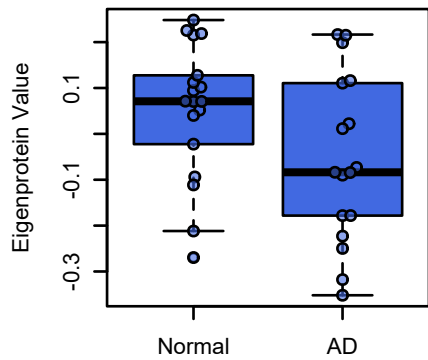

**M20 royalblue**  
Ambiguous  
ANOVA  $p = 0.053$

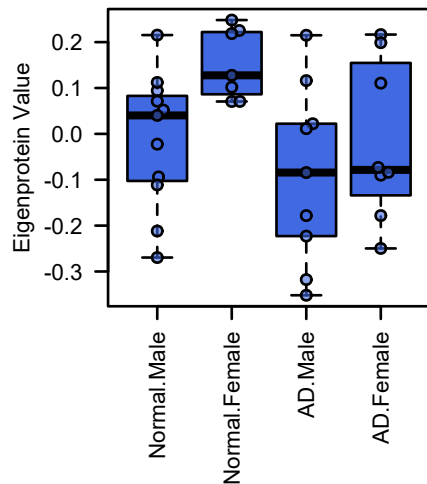

**bicor=-0.3, p=0.078**  
**cor=-0.31, p=0.07**

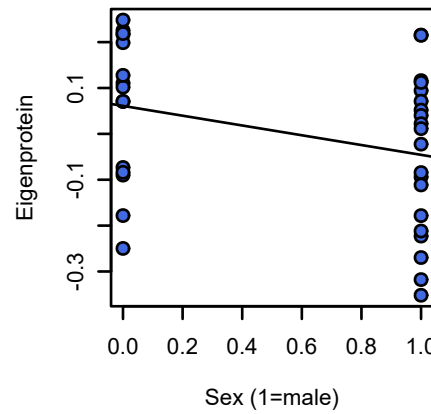

**bicor=-0.41, p=0.092**  
**cor=-0.4, p=0.1**

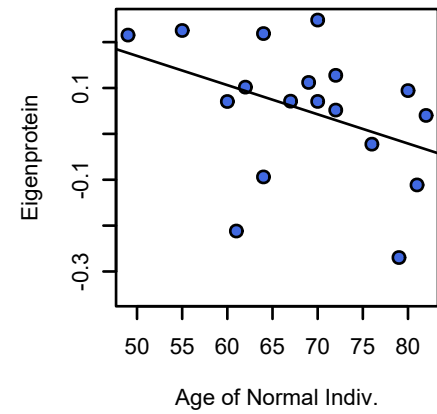

**bicor=0.25, p=0.33**  
**cor=0.27, p=0.29**

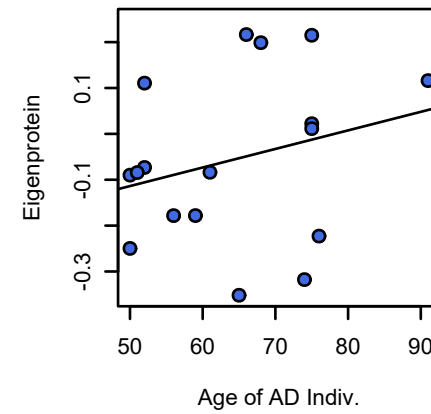

**bicor=0.21, p=0.23**  
**cor=0.2, p=0.25**

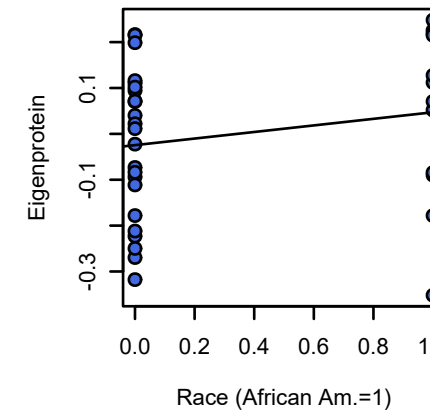

**bicor=-0.3, p=0.078**  
**cor=-0.33, p=0.053**

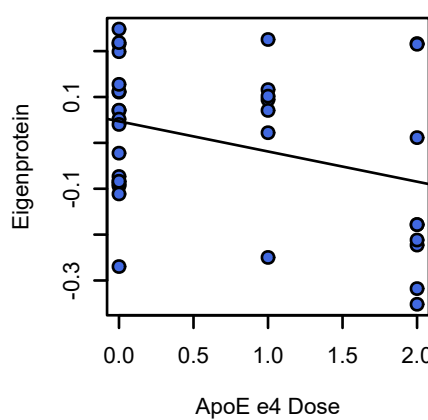

**bicor=0.37, p=0.041**  
**cor=0.46, p=0.0092**

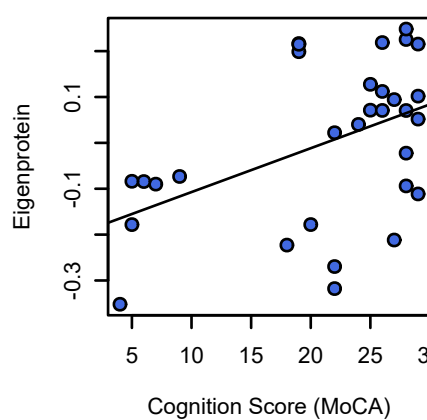

**bicor=-0.28, p=0.098**  
**cor=-0.23, p=0.18**

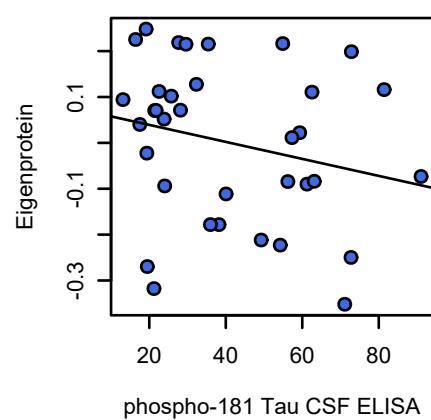

**bicor=-0.37, p=0.028**  
**cor=-0.36, p=0.034**

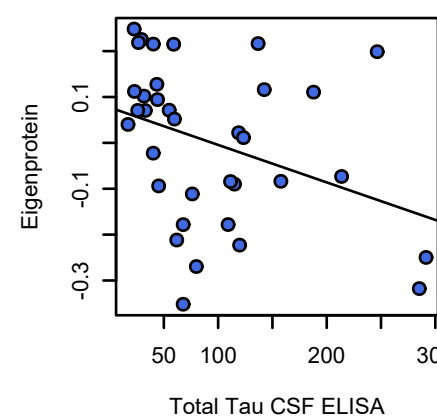

**bicor=0.26, p=0.13**  
**cor=0.23, p=0.18**

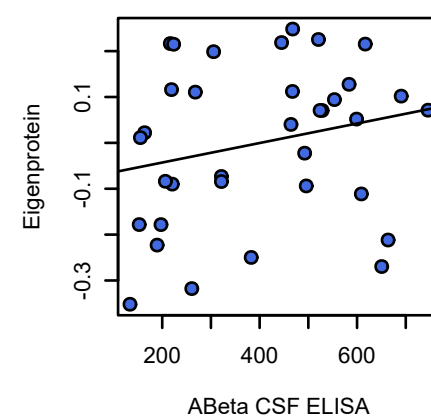

**bicor=0.44, p=0.0089**  
**cor=0.45, p=0.0067**

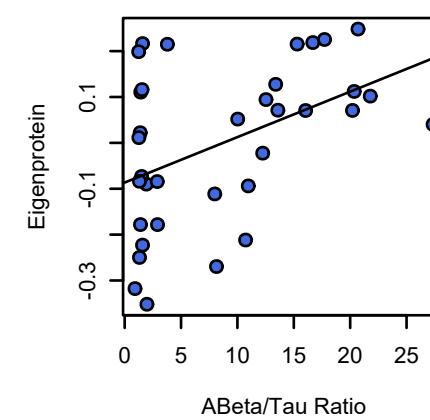

**M22 darkgreen**  
Age+Sex-disc.  $p = 0.019$   
Sex-discounted  $p = 0.41$

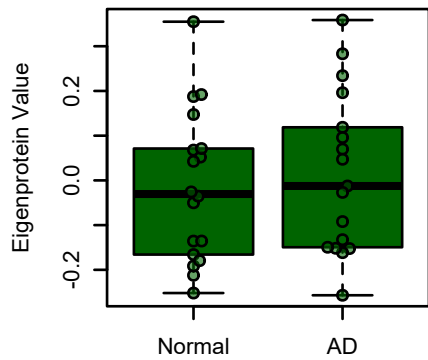

**M22 darkgreen**  
ECM/Actin Binding  
ANOVA  $p = 0.023$

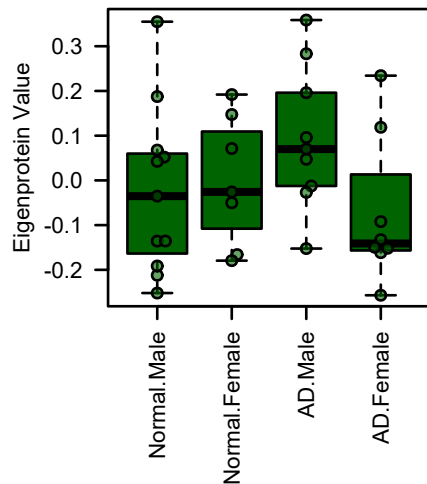

**bicor=0.2, p=0.26**  
**cor=0.21, p=0.23**

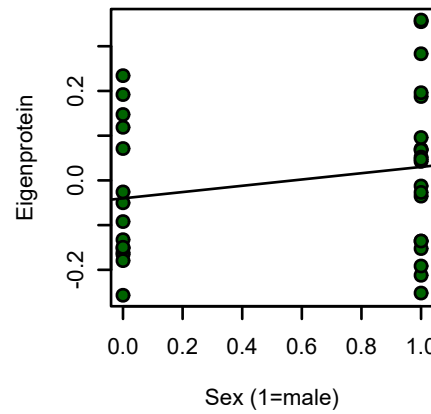

**bicor=0.32, p=0.19**  
**cor=0.33, p=0.18**

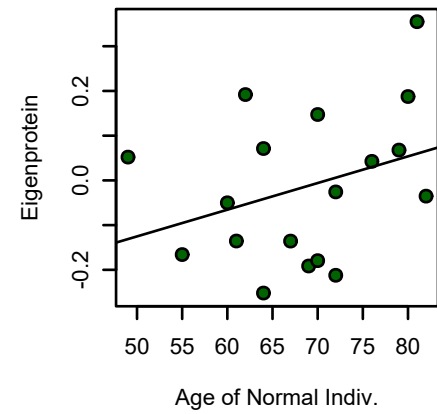

**bicor=0.64, p=0.0057**  
**cor=0.66, p=0.0039**

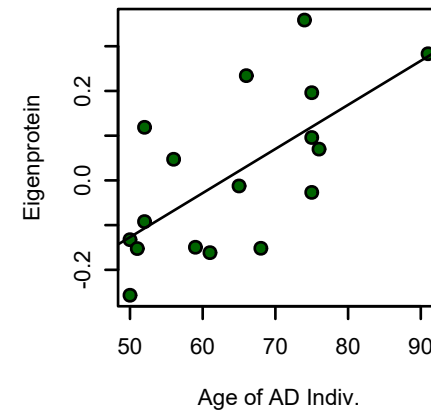

**bicor=-0.24, p=0.16**  
**cor=-0.25, p=0.15**

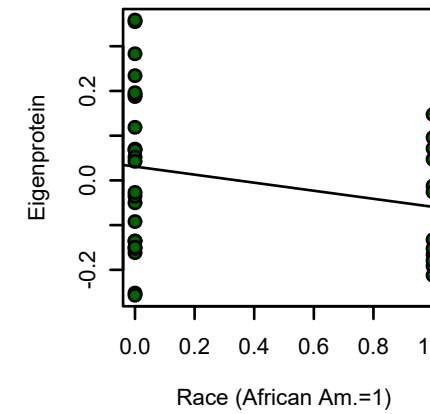

**bicor=0.29, p=0.095**  
**cor=0.29, p=0.091**

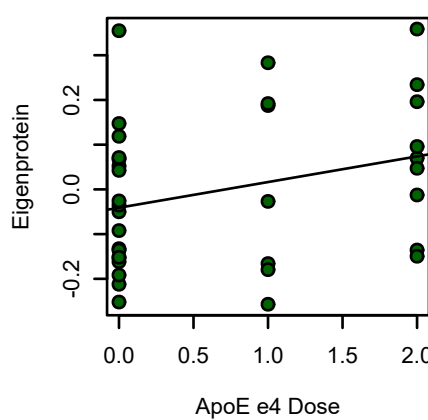

**bicor=-0.05, p=0.79**  
**cor=0.097, p=0.6**

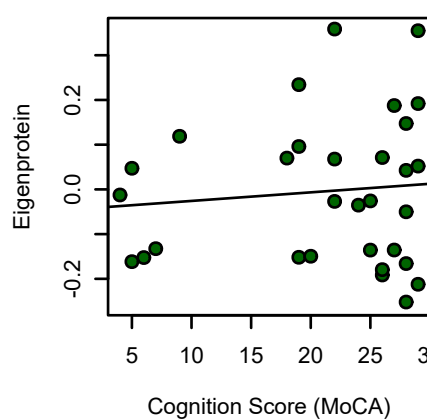

**bicor=0.0057, p=0.97**  
**cor=-0.0073, p=0.97**

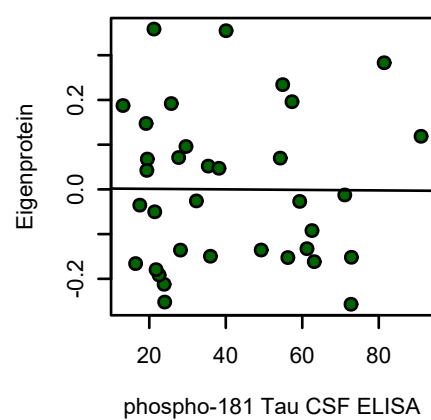

**bicor=0.11, p=0.52**  
**cor=0.074, p=0.67**

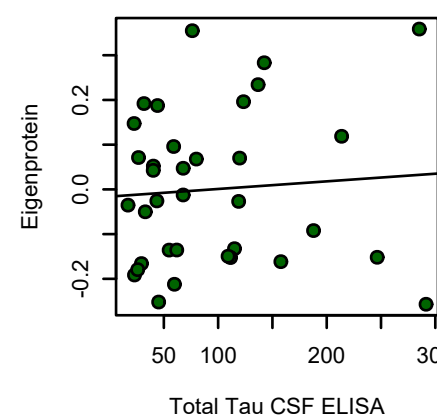

**bicor=-0.13, p=0.46**  
**cor=-0.1, p=0.57**

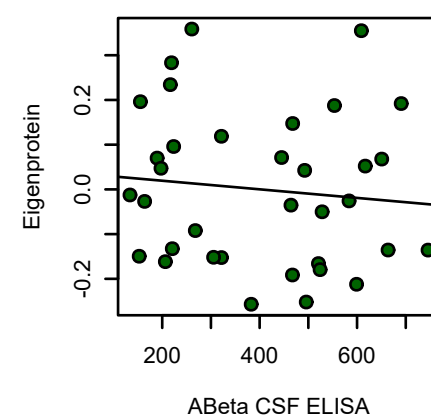

**bicor=-0.09, p=0.61**  
**cor=-0.11, p=0.53**

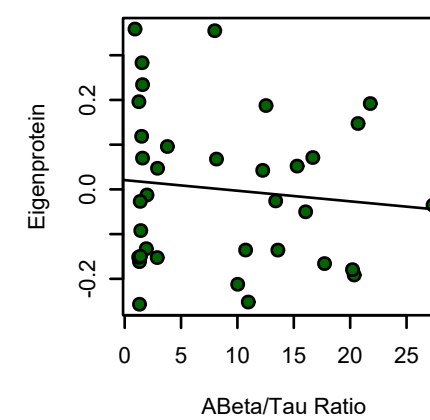

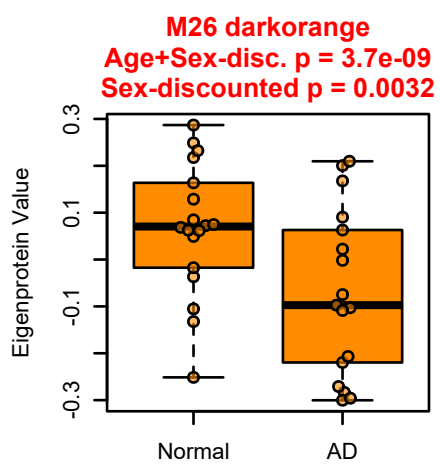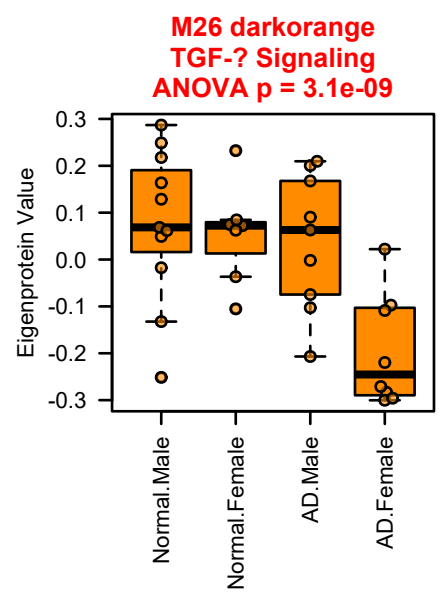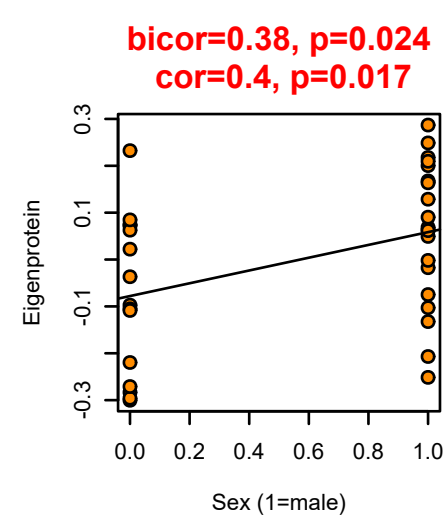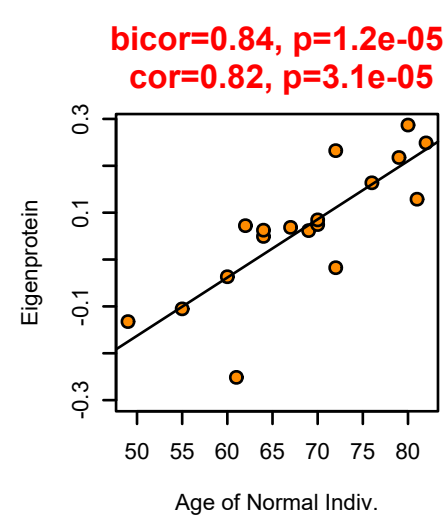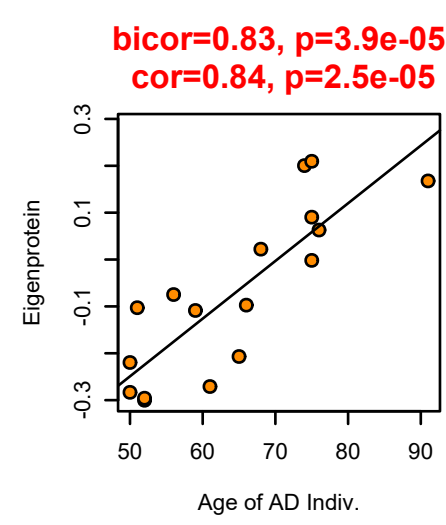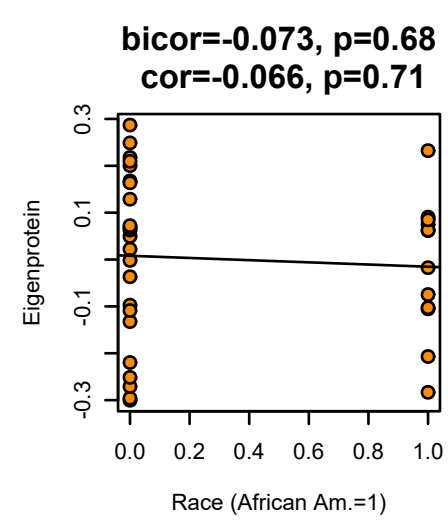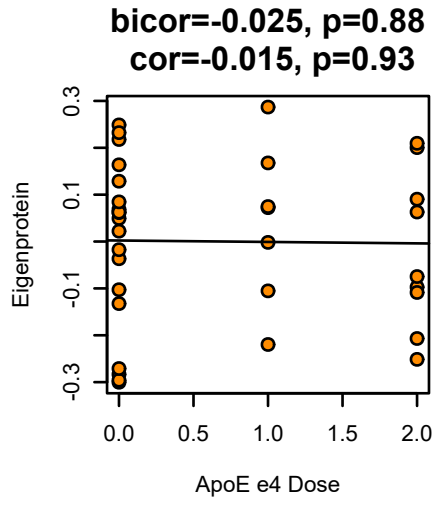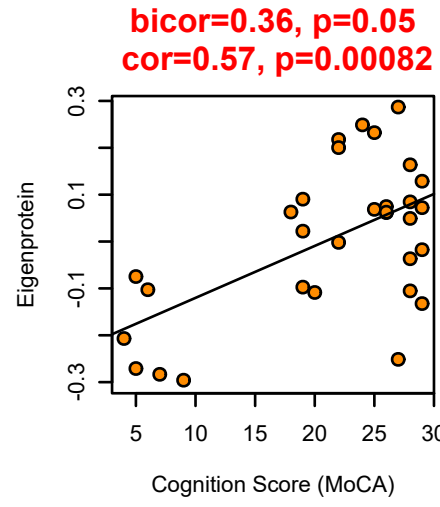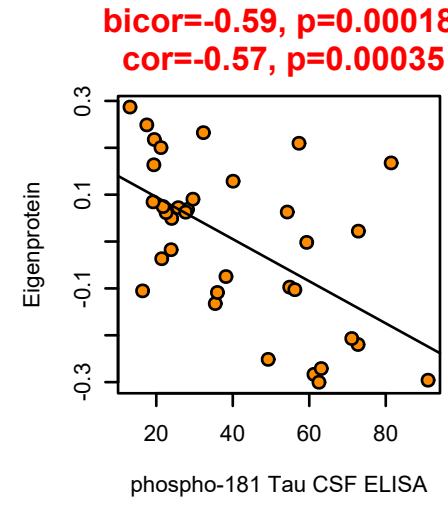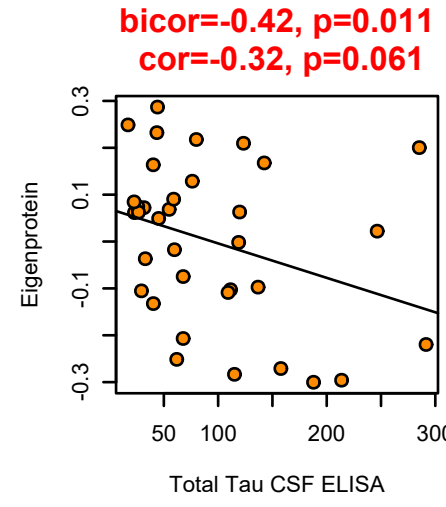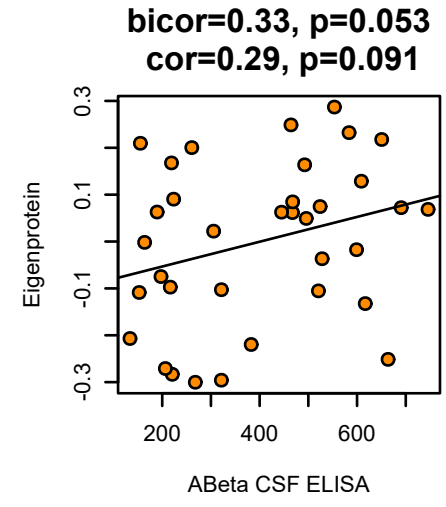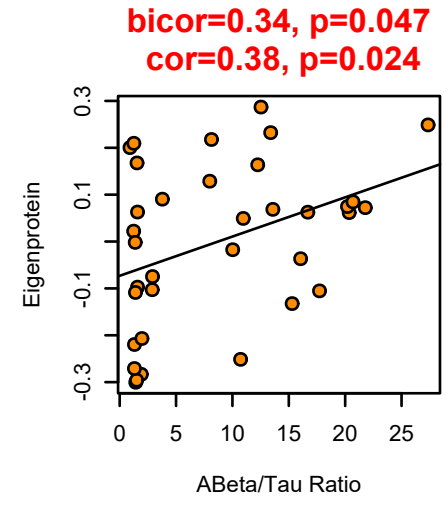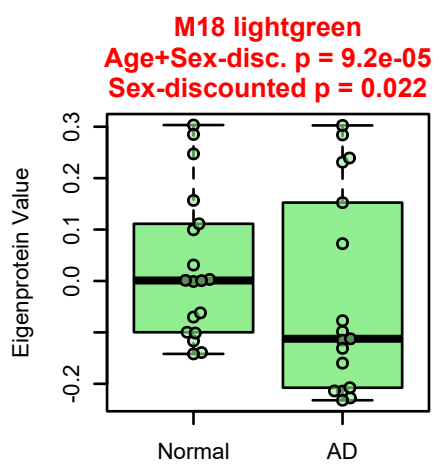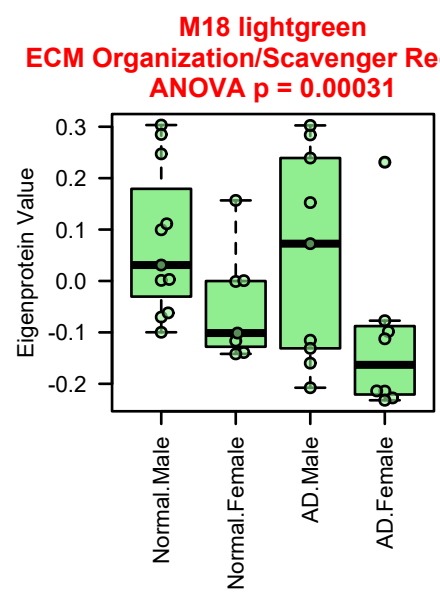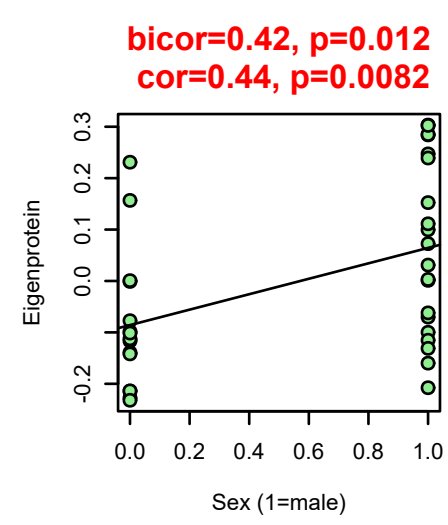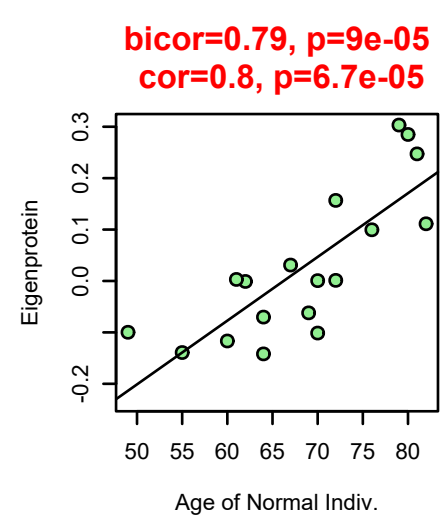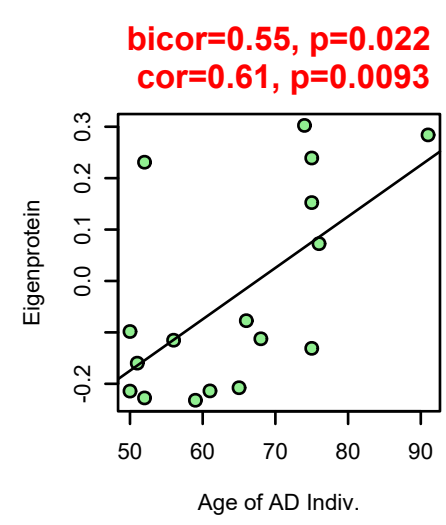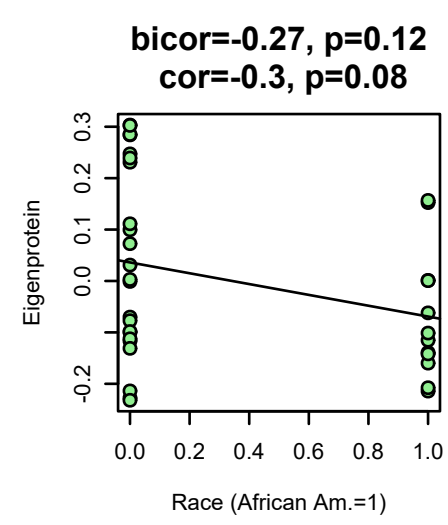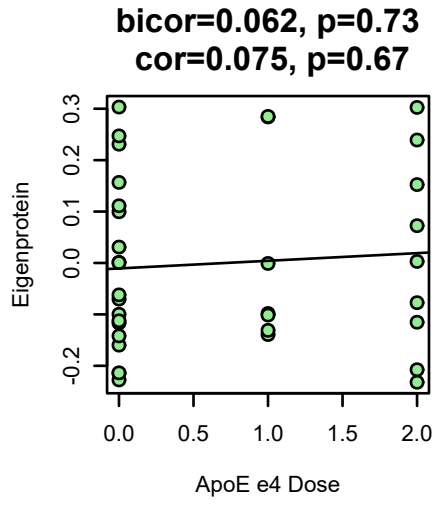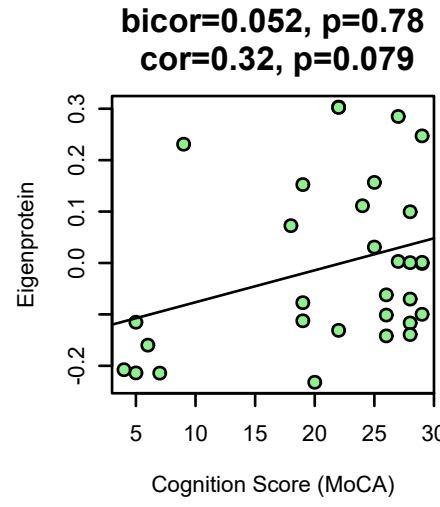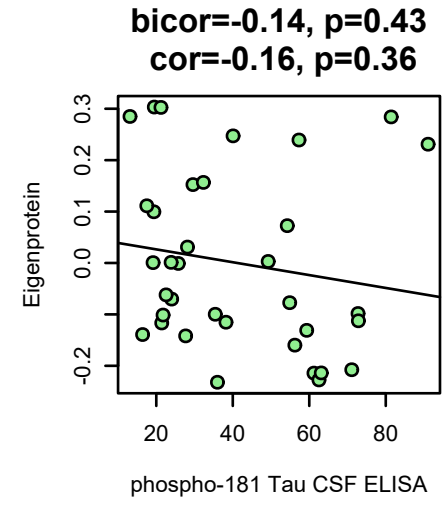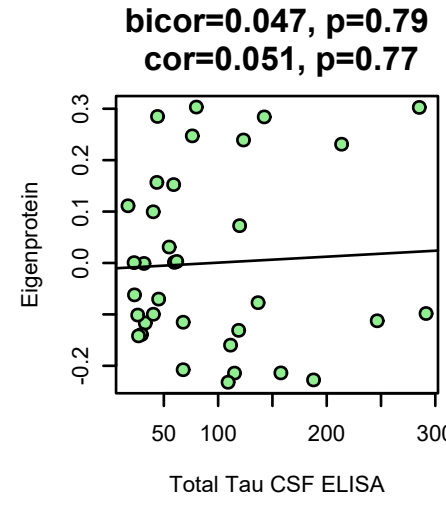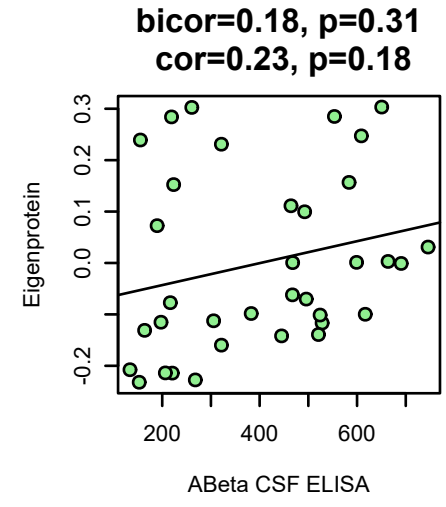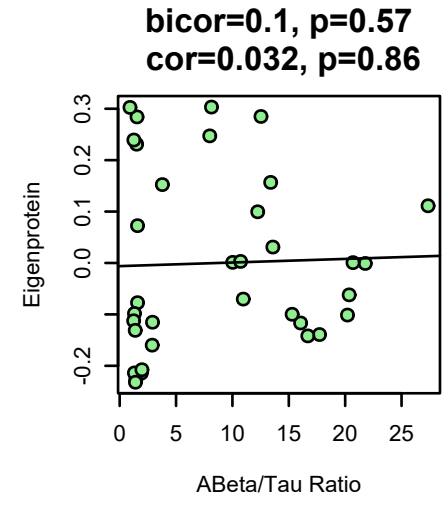

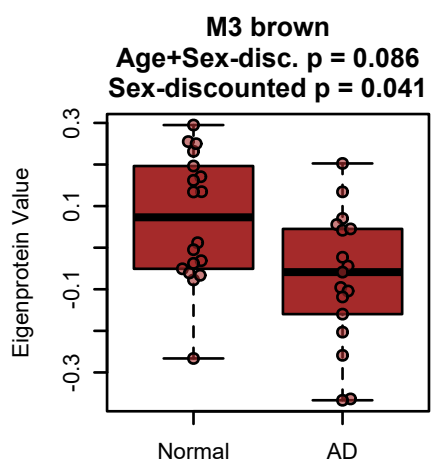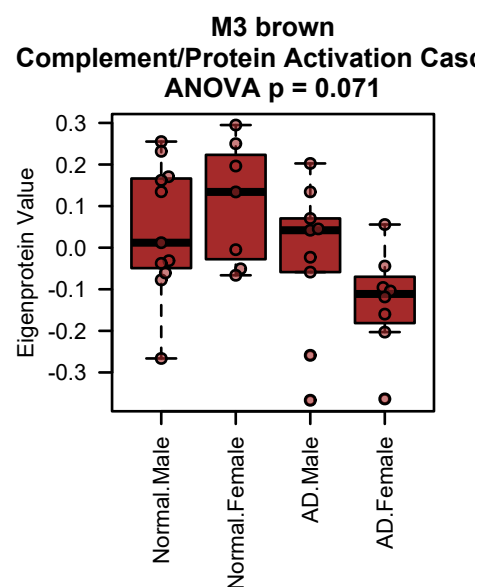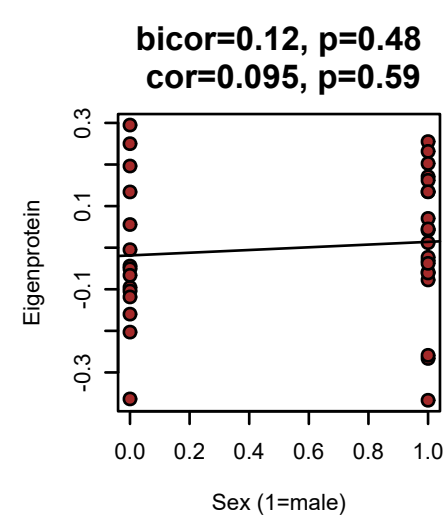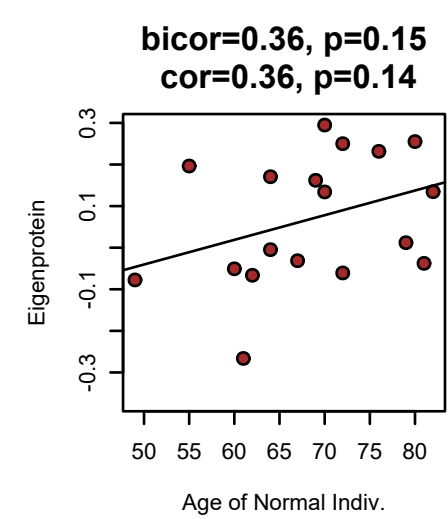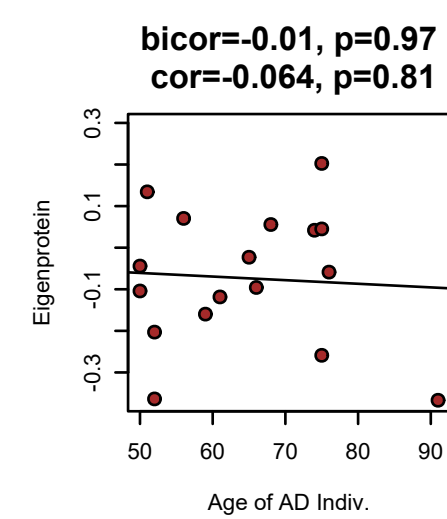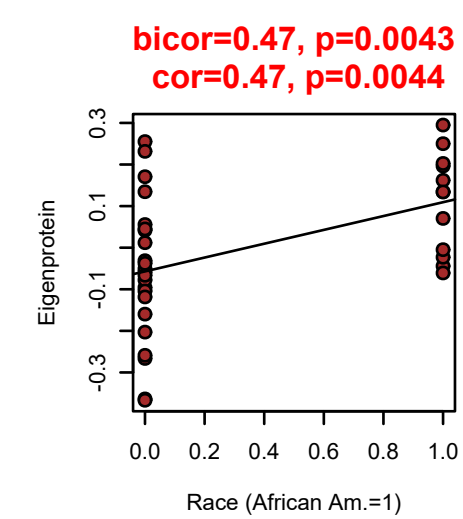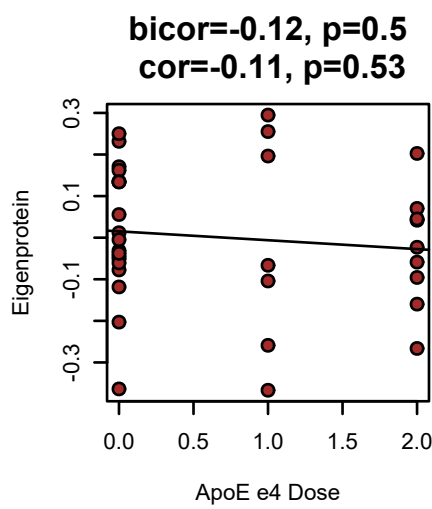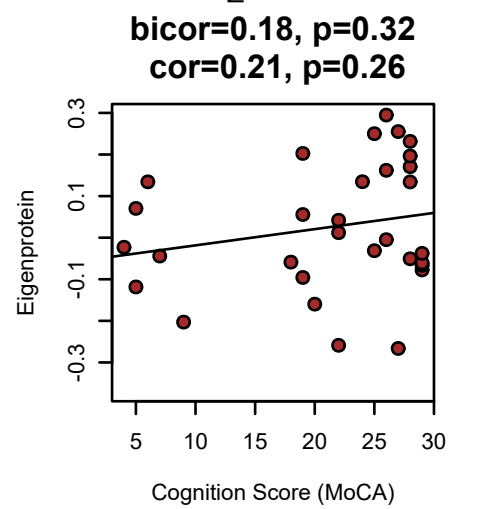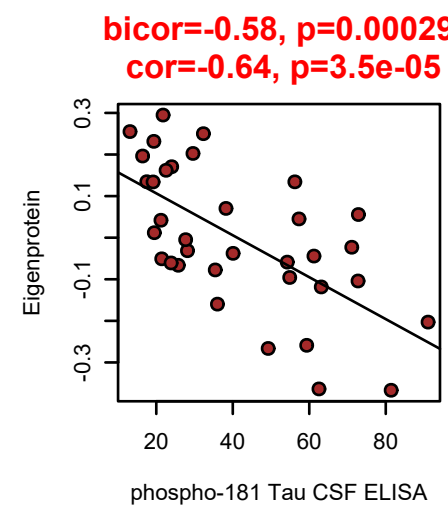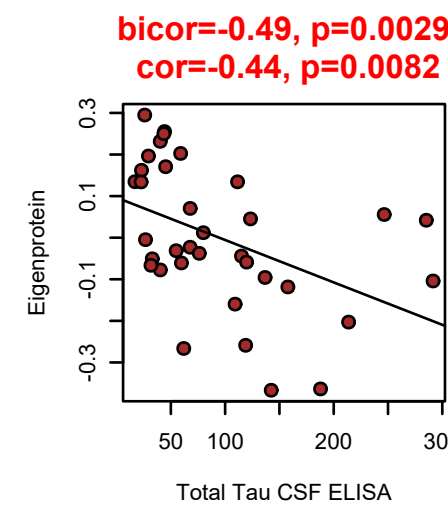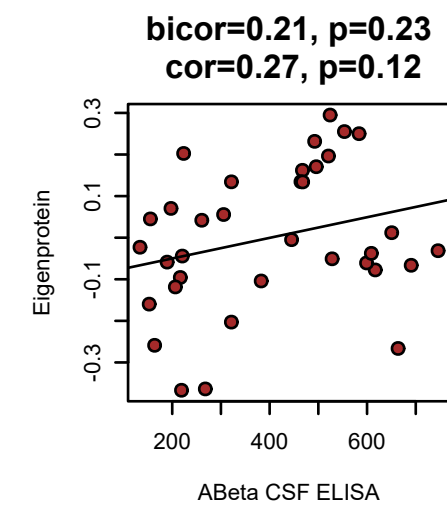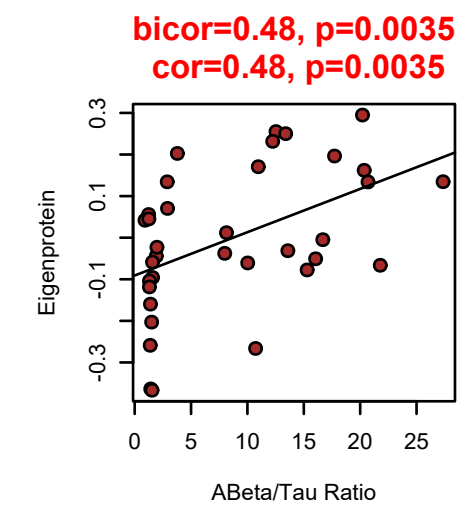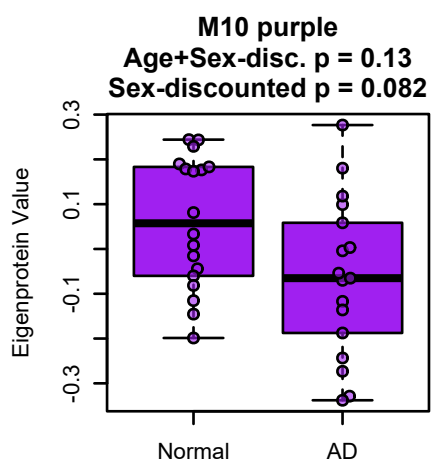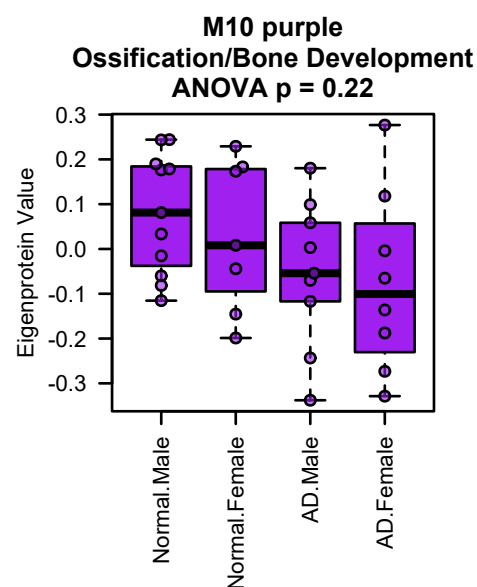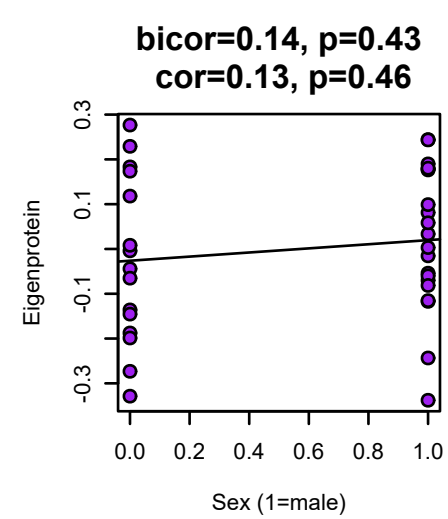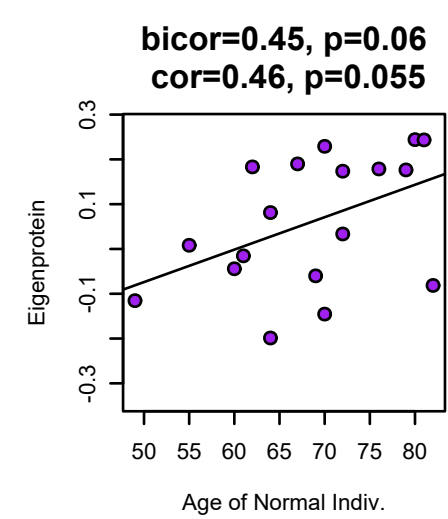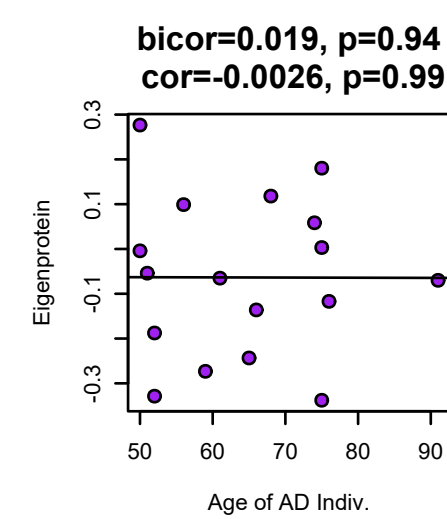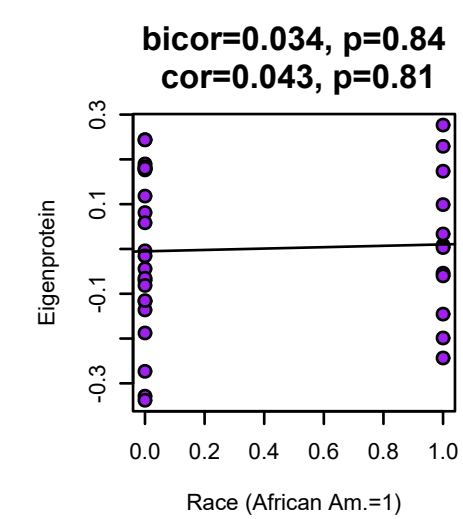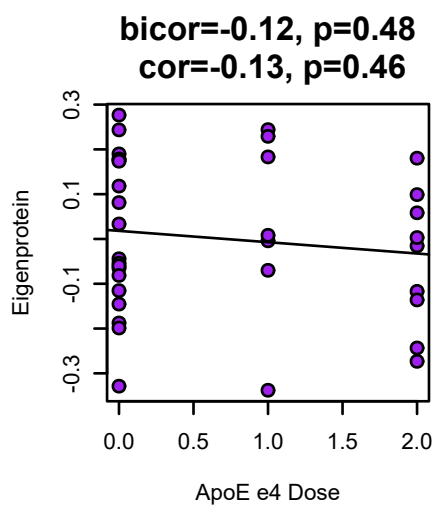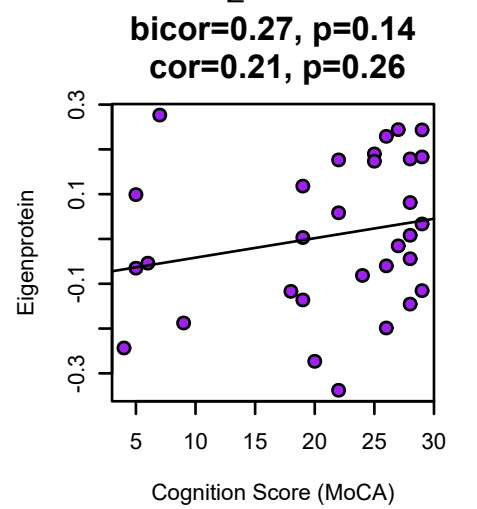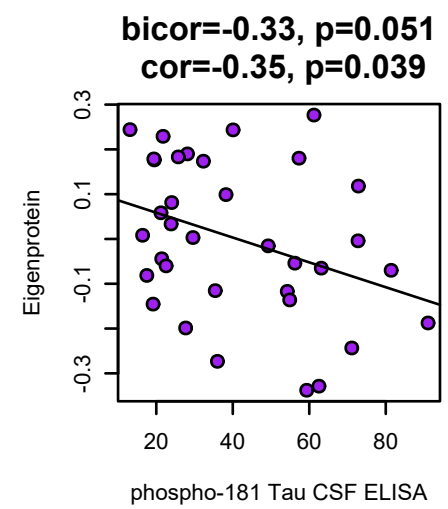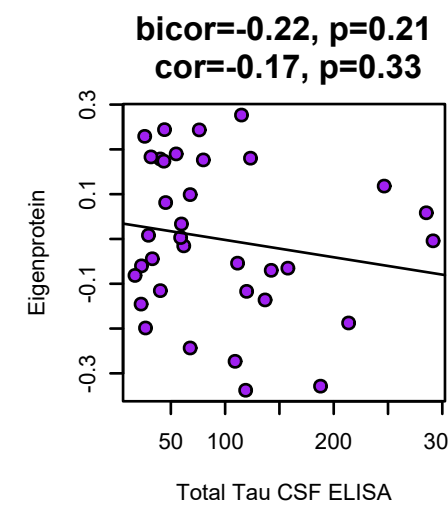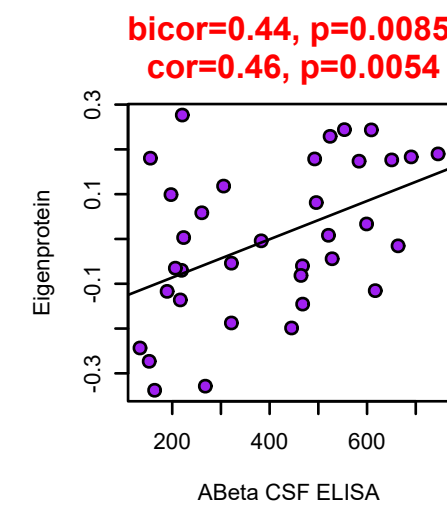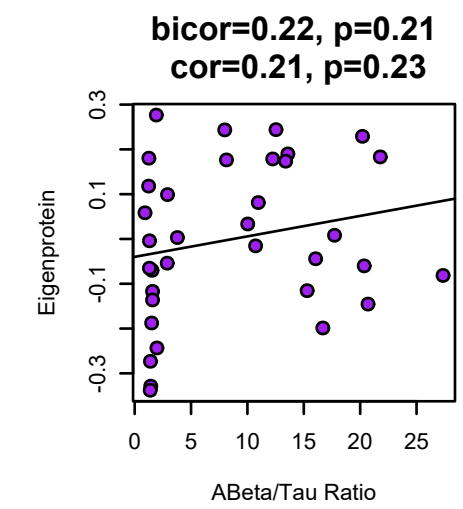

**M11 greenyellow.CSF38**  
Ambiguous

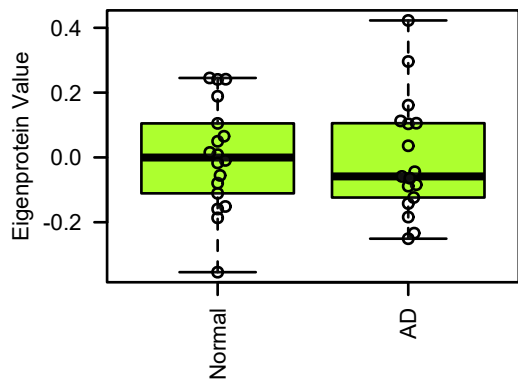

**MEgreenyellow.Brain (Synthetic)**  
ANOVA p: 0.097

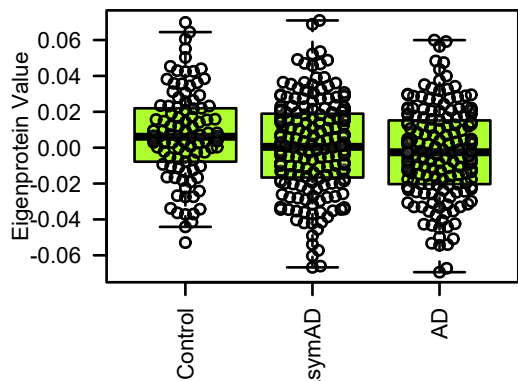

**MEgreenyellow.Brain (Synthetic)**  
ANOVA p: 0.21

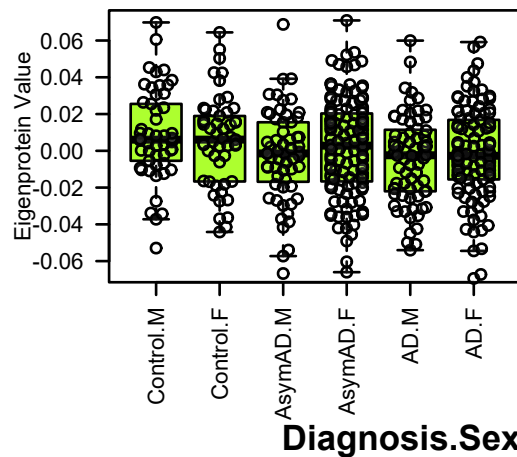

**bicor=0.073, p=0.11**  
**cor=0.11, p=0.015**

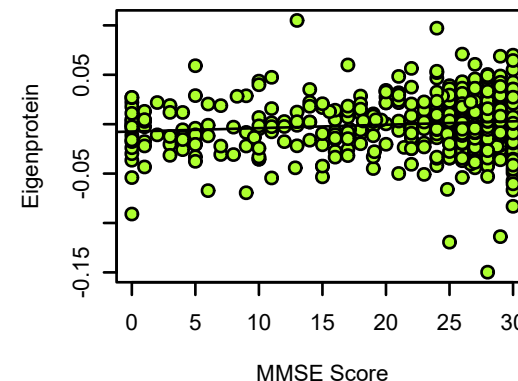

**M21 darkred.CSF38**  
Neuron Recognition

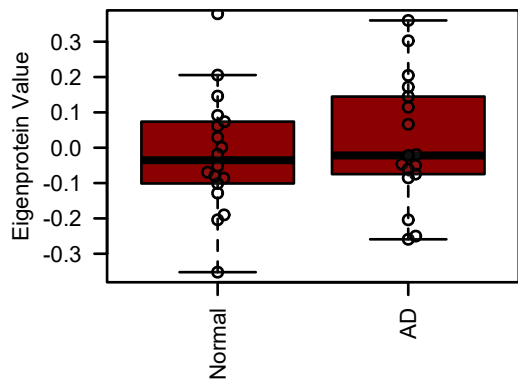

**MEdarkred.Brain (Synthetic)**  
ANOVA p: 6.7e-09

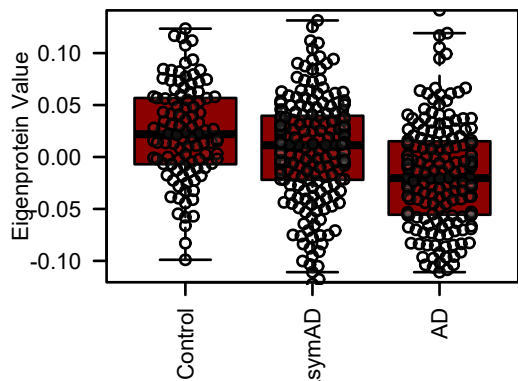

**MEdarkred.Brain (Synthetic)**  
ANOVA p: 1e-07

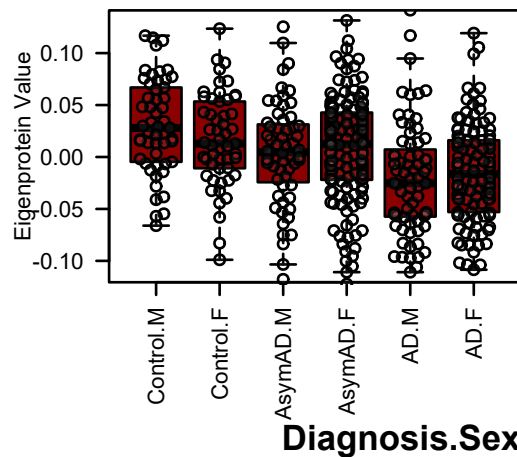

**bicor=0.21, p=2.1e-06**  
**cor=0.28, p=3.1e-10**

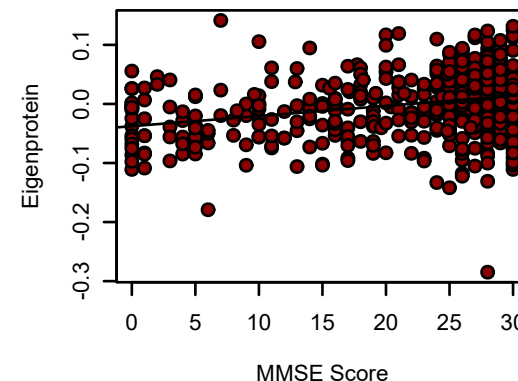

**M17 grey60.CSF38**  
Ambiguous

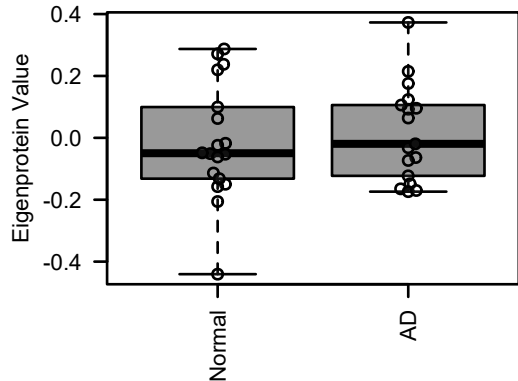

**MEgrey60.Brain (Synthetic)**  
ANOVA p: 3.7e-05

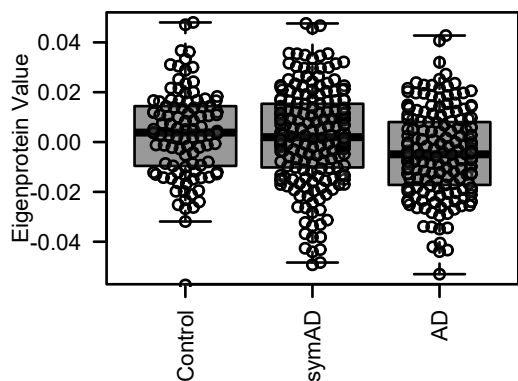

**MEgrey60.Brain (Synthetic)**  
ANOVA p: 0.00075

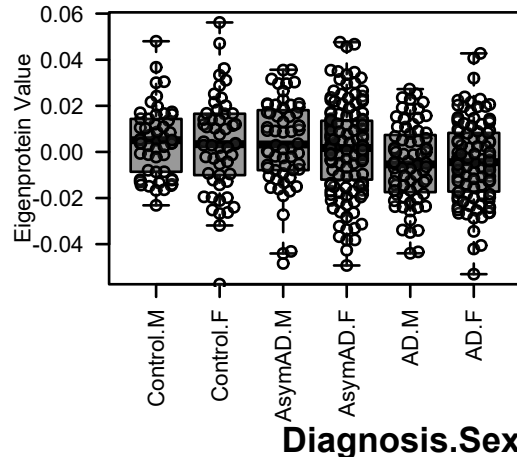

**bicor=0.17, p=0.00012**  
**cor=0.2, p=8.5e-06**

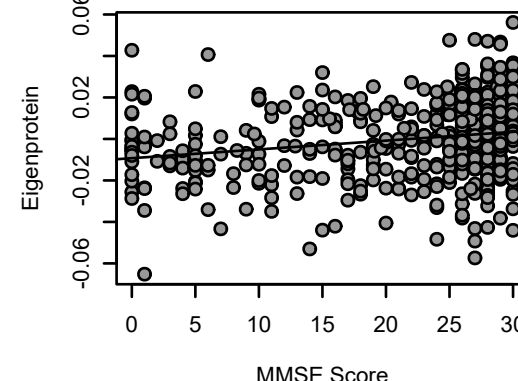

**M6 red.CSF38**  
Muscle/Neurotransmitter Transport

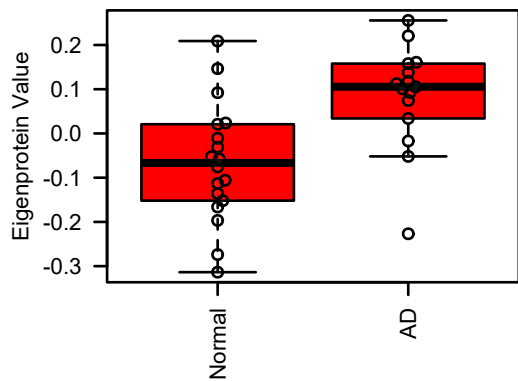

**MEred.Brain (Synthetic)**  
ANOVA p: 0.00035

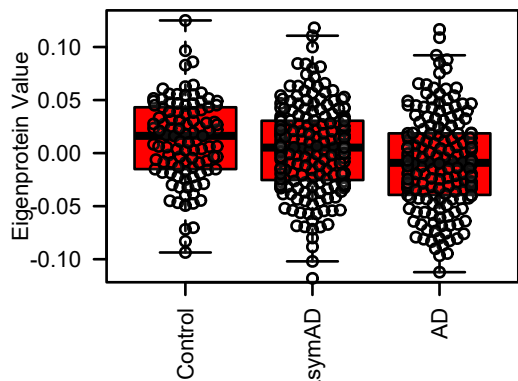

**MEred.Brain (Synthetic)**  
ANOVA p: 0.00029

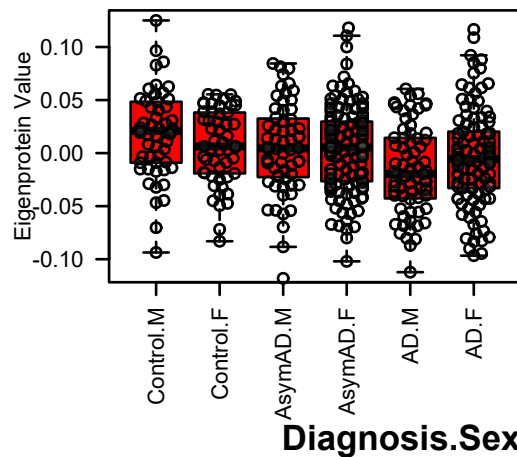

**bicor=0.15, p=0.00092**  
**cor=0.2, p=8.5e-06**

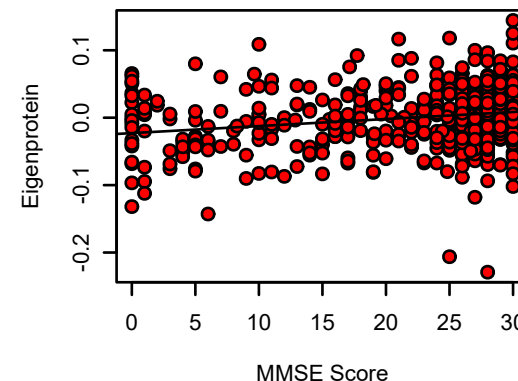

**M15 midnightblue.CSF38**  
Post-Synaptic Membrane

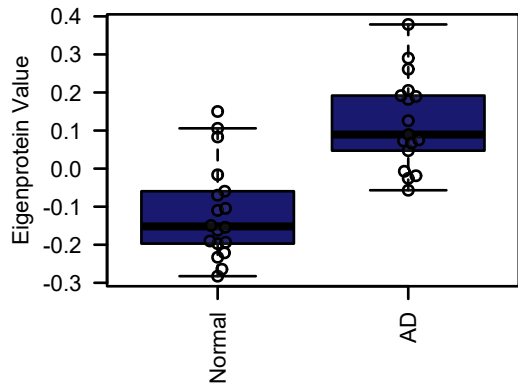

**MEmidnightblue.Brain (Synthetic)**  
ANOVA p: 0.032

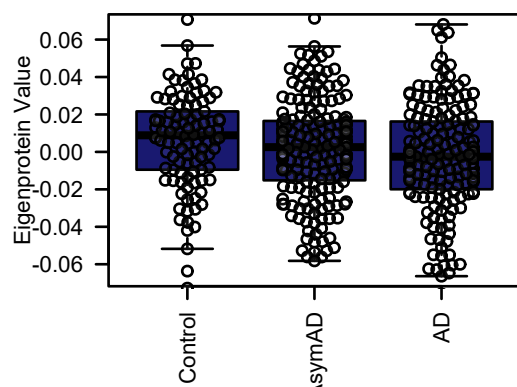

**MEmidnightblue.Brain (Synthetic)**  
ANOVA p: 0.067

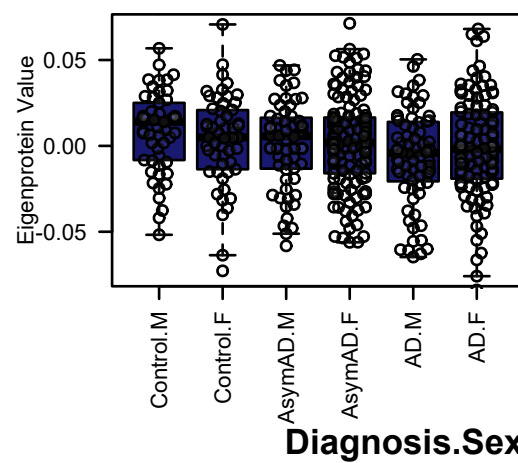

**bicor=0.085, p=0.062**  
**cor=0.14, p=0.0019**

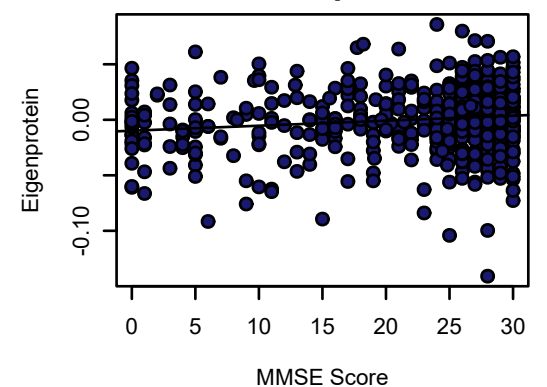

**M8 pink.CSF38**  
Autophagy

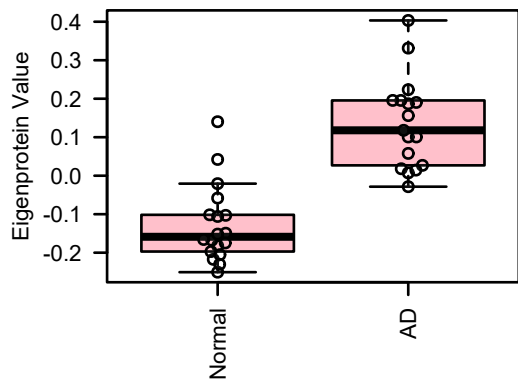

**MEpink.Brain (Synthetic)**  
ANOVA p: 0.00031

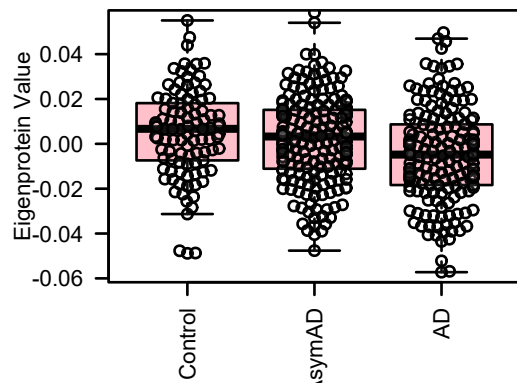

**MEpink.Brain (Synthetic)**  
ANOVA p: 0.0014

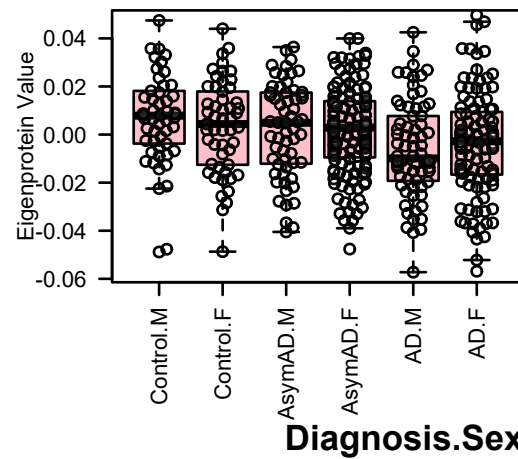

**bicor=0.14, p=0.0027**  
**cor=0.22, p=9.2e-07**

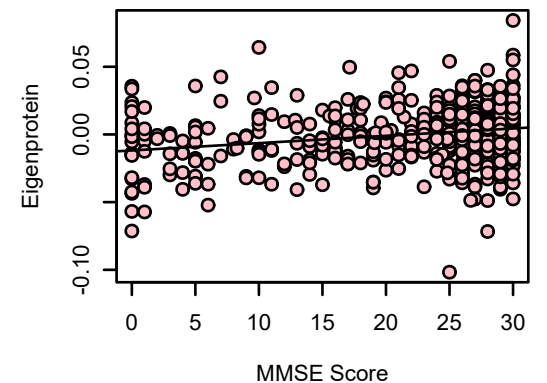

**M19 lightyellow.CSF38**  
Synapse Organization

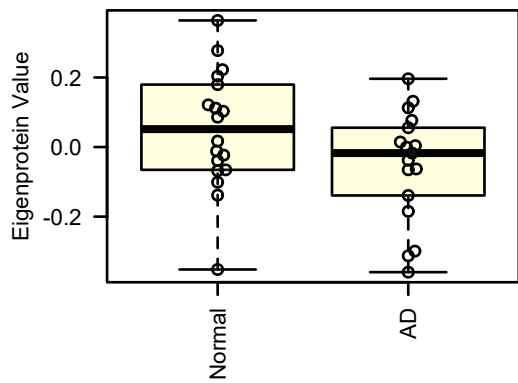

**MElightyellow.Brain (Synthetic)**  
ANOVA p: 0.46

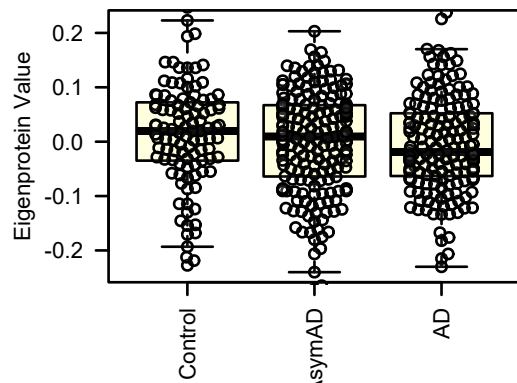

**MElightyellow.Brain (Synthetic)**  
ANOVA p: 0.14

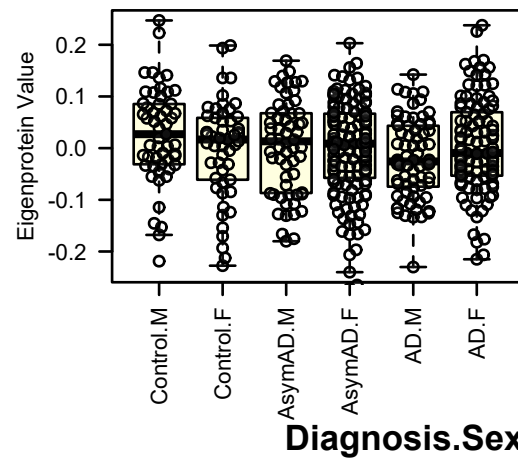

**bicor=0.046, p=0.31**  
**cor=0.047, p=0.3**

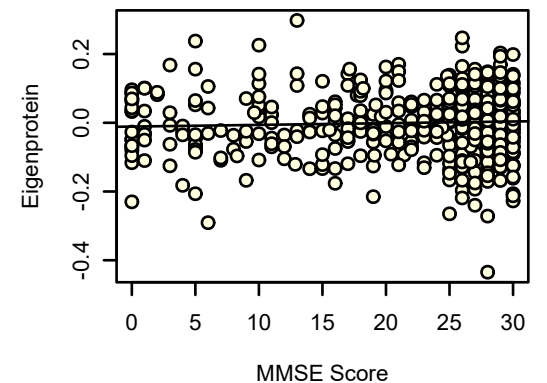

**M7 black.CSF38**  
SNAP Receptor/SNARE Complex

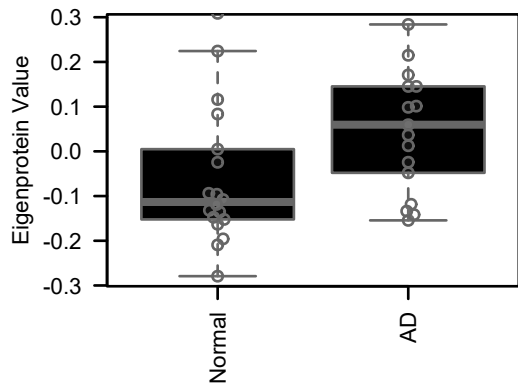

**MEblack.Brain (Synthetic)**  
ANOVA p: 0.041

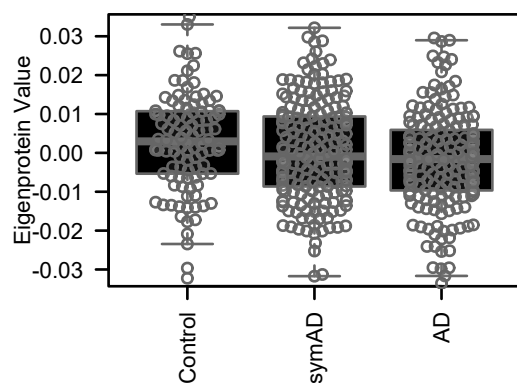

**MEblack.Brain (Synthetic)**  
ANOVA p: 0.066

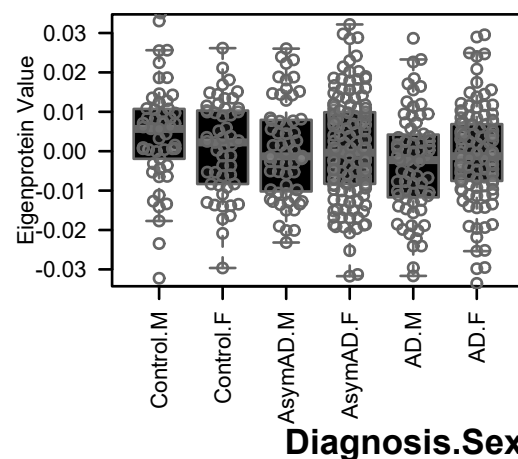

**bicor=0.065, p=0.15**  
**cor=0.15, p=0.00089**

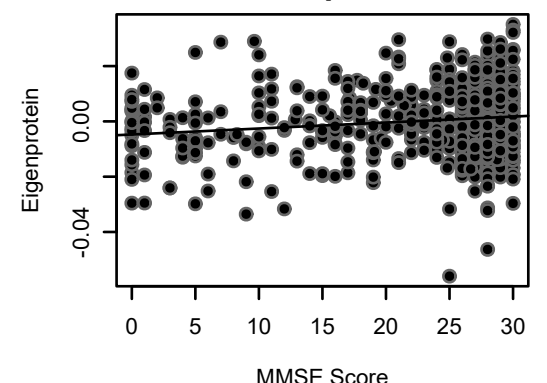

**M2 blue.CSF38**  
Neuronal/Axon Development

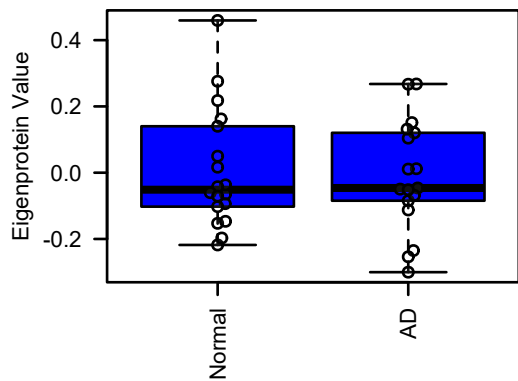

**MEblue.Brain (Synthetic)**  
ANOVA p: 0.0039

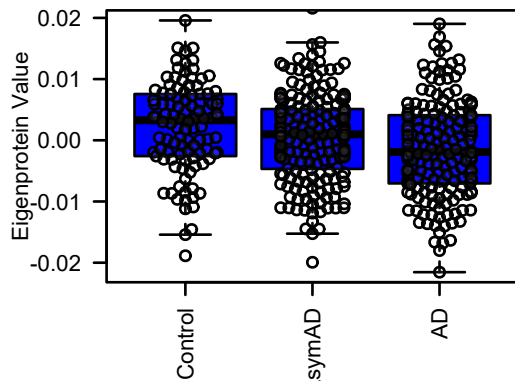

**MEblue.Brain (Synthetic)**  
ANOVA p: 0.0046

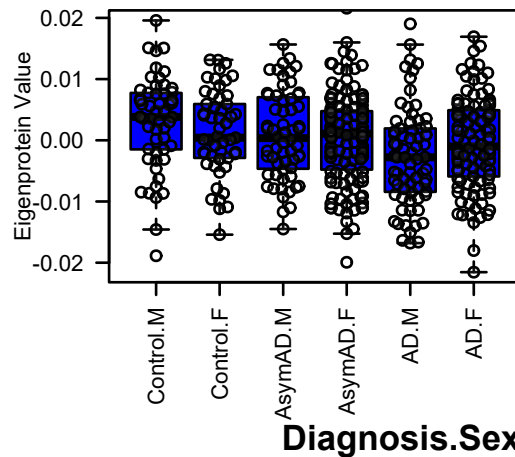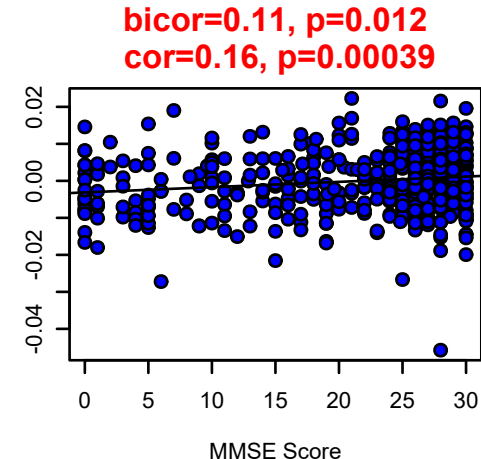

**M14 cyan.CSF38**  
Golgi/Glycosylation

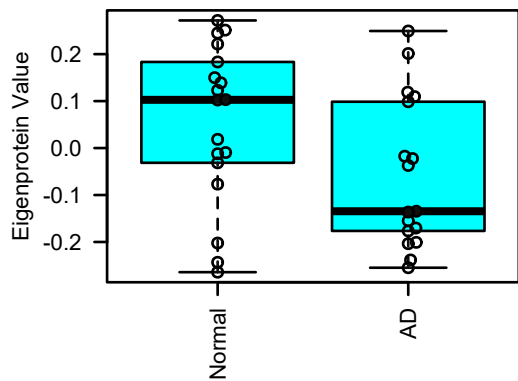

**MEcyan.Brain (Synthetic)**  
ANOVA p: 0.067

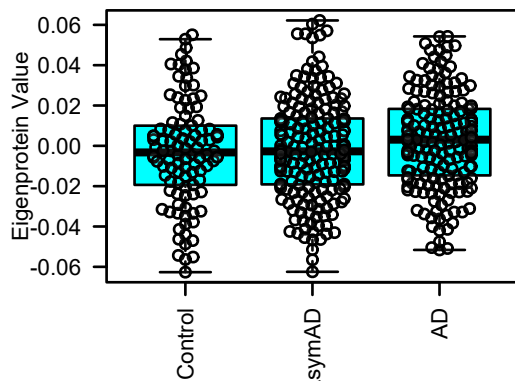

**MEcyan.Brain (Synthetic)**  
ANOVA p: 0.16

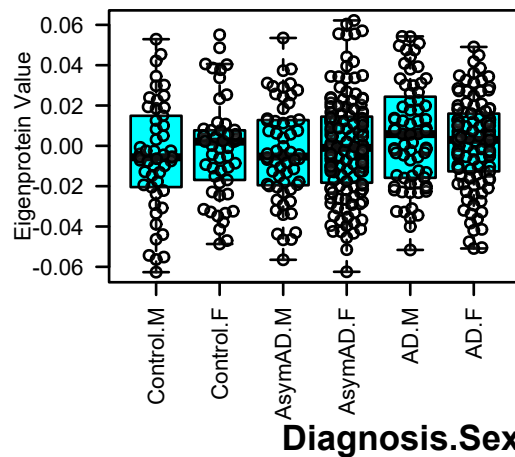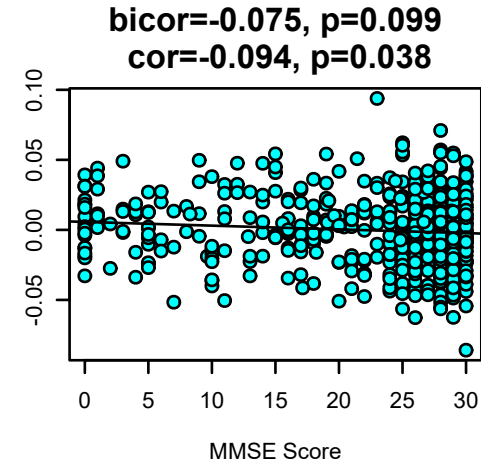

**M27 white.CSF38**  
Ambiguous

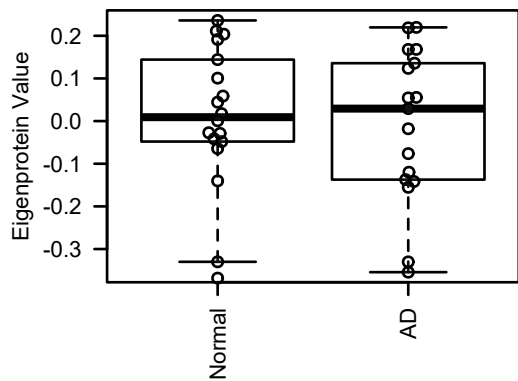

**MEwhite.Brain (Synthetic)**  
ANOVA p: 0.01

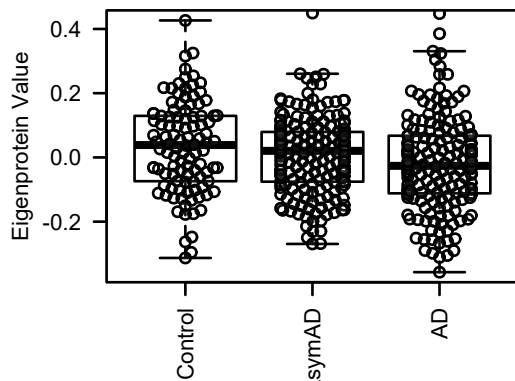

**MEwhite.Brain (Synthetic)**  
ANOVA p: 0.061

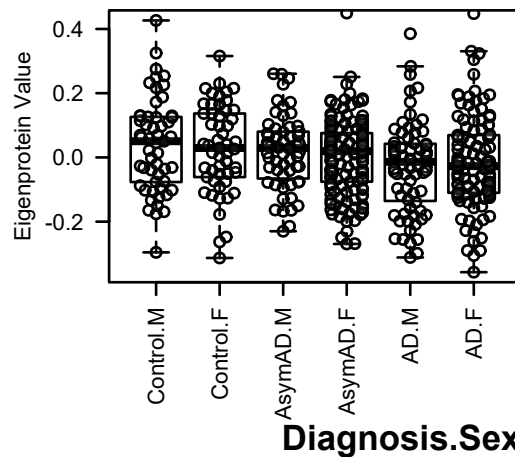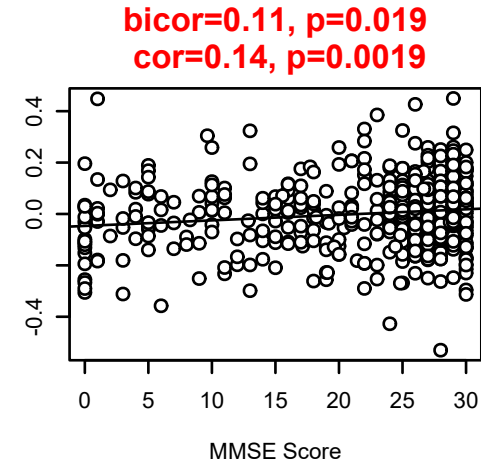

**M31 paleturquoise.CSF38**  
Glial Cell Differentiation

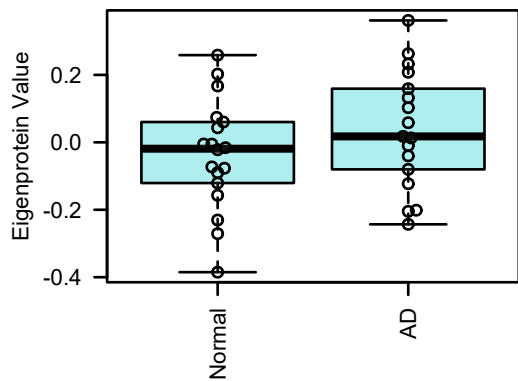

**MEpaleturquoise.Brain (Synthetic)**  
ANOVA p: 0.00029

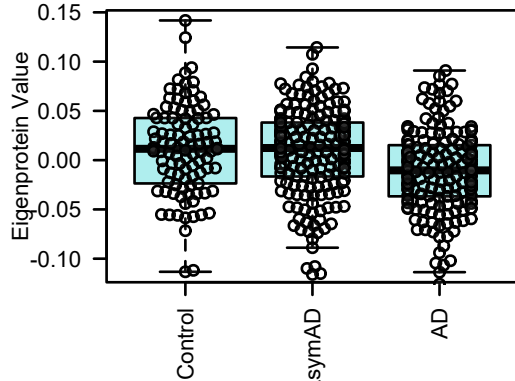

**MEpaleturquoise.Brain (Synthetic)**  
ANOVA p: 0.0034

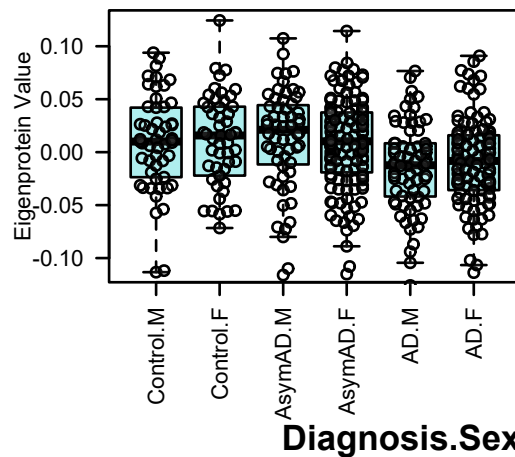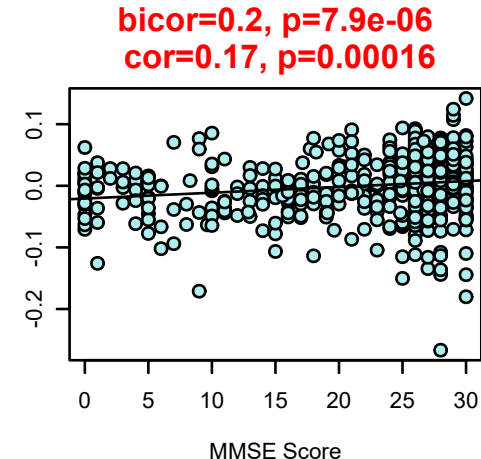

**M32 violet.CSF38**  
Synaptic Membrane/Matrisome

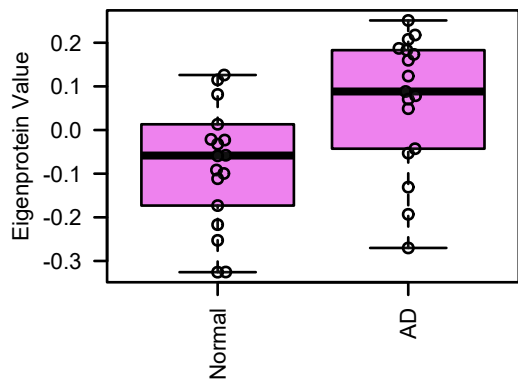

**MEviolet.Brain (Synthetic)**  
ANOVA p: 1.5e-14

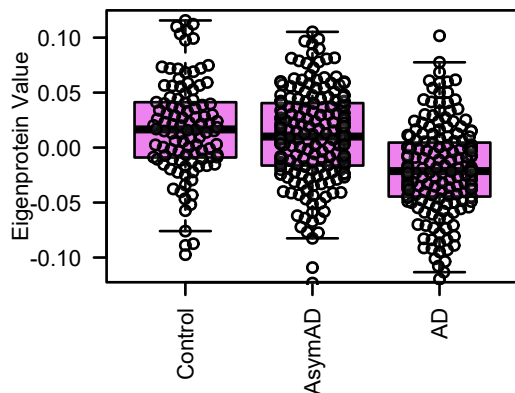

**MEviolet.Brain (Synthetic)**  
ANOVA p: 9.6e-13

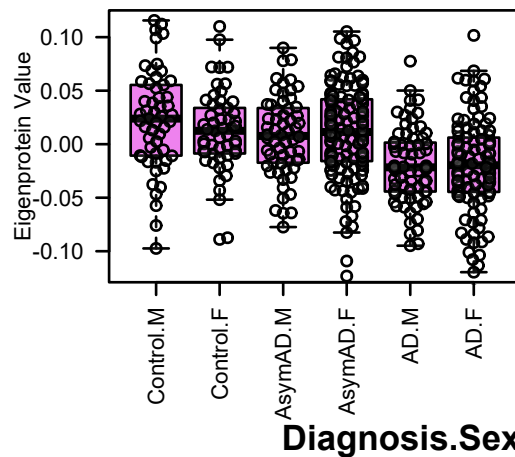

**bicor=0.29, p=9.5e-11**  
**cor=0.37, p=2.8e-17**

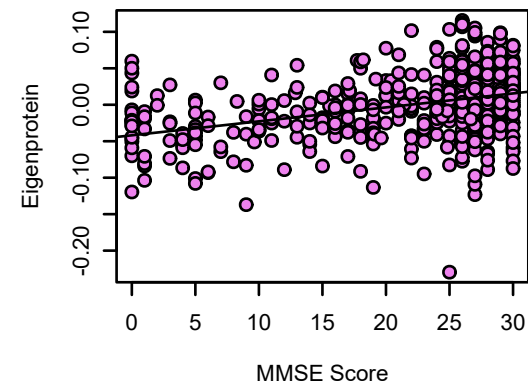

**M13 salmon.CSF38**  
Semaphorin-Plexin/Axon Guidance

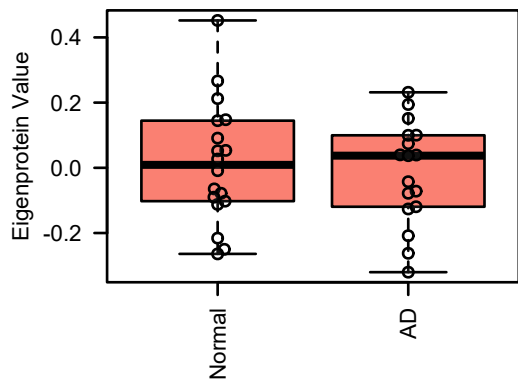

**MEsalmon.Brain (Synthetic)**  
ANOVA p: 8.3e-12

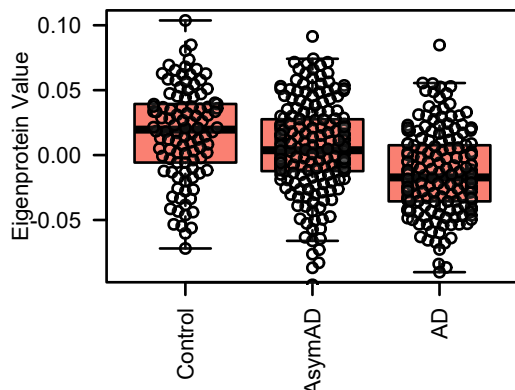

**MEsalmon.Brain (Synthetic)**  
ANOVA p: 7.4e-10

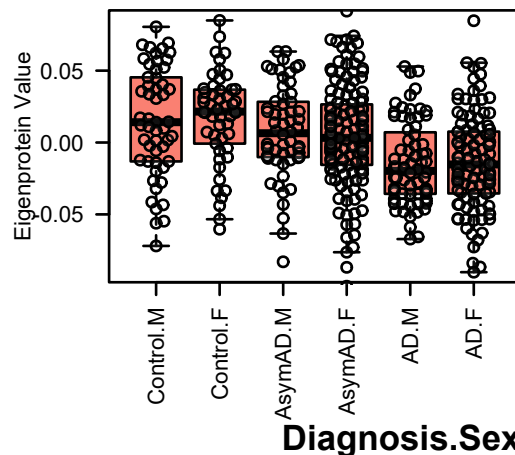

**bicor=0.24, p=1.3e-07**  
**cor=0.29, p=6.5e-11**

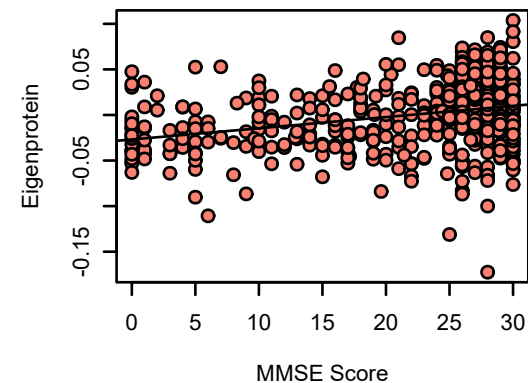

**M12 tan.CSF38**  
Neurexin/Neuronal Adhesion

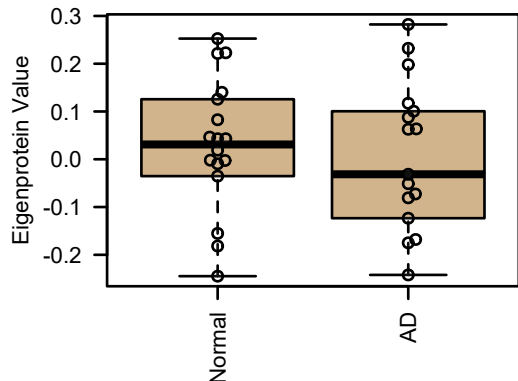

**MEtan.Brain (Synthetic)**  
ANOVA p: 5.6e-08

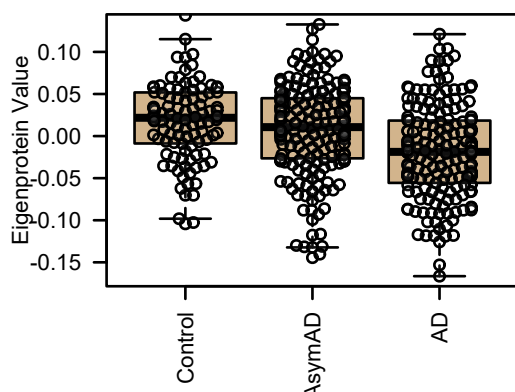

**MEtan.Brain (Synthetic)**  
ANOVA p: 1.7e-06

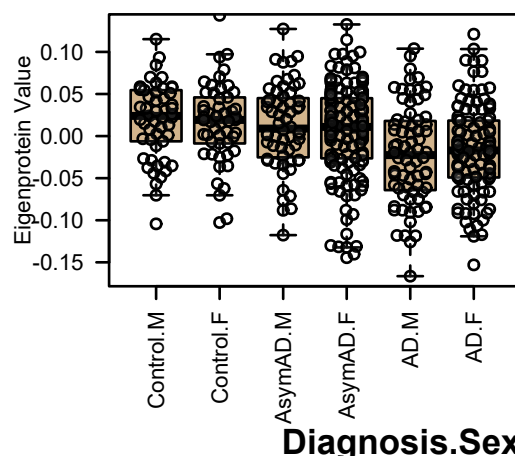

**bicor=0.21, p=4.7e-06**  
**cor=0.27, p=1.3e-09**

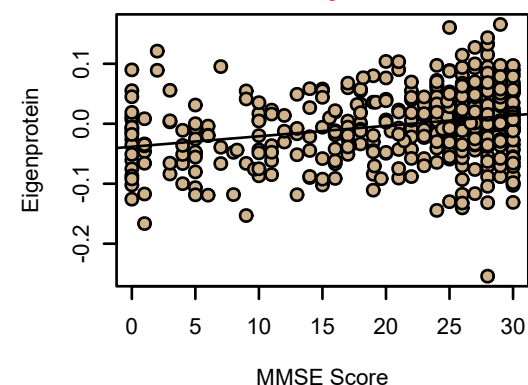

**M9 magenta.CSF38**  
Ambiguous

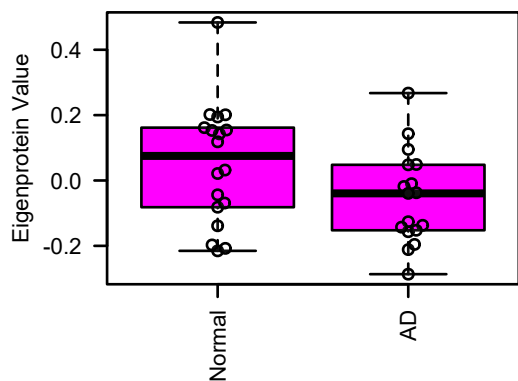

**MEmagenta.Brain (Synthetic)**  
ANOVA p: 0.13

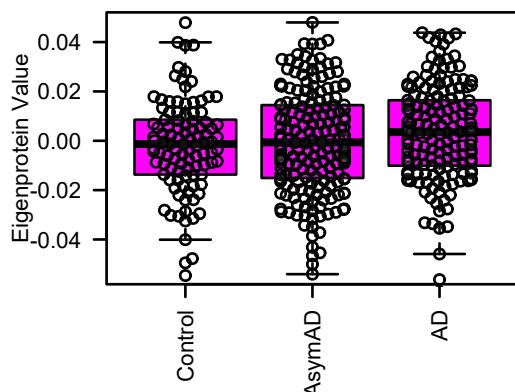

**MEmagenta.Brain (Synthetic)**  
ANOVA p: 0.38

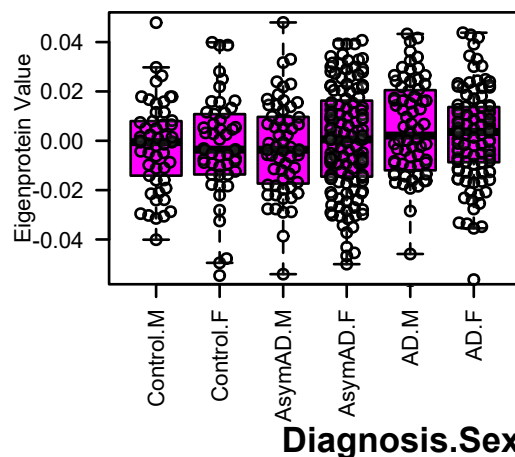

**bicor=-0.11, p=0.02**  
**cor=-0.091, p=0.045**

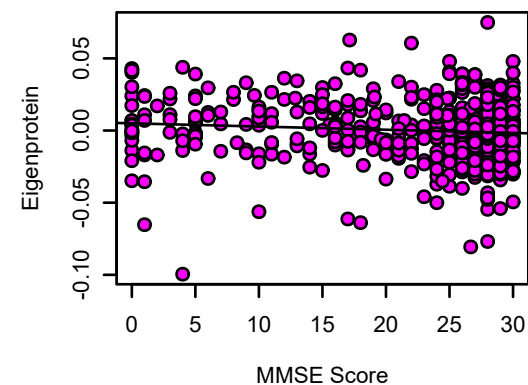

**M30 steelblue.CSF38**  
Ribonucleoprotein Complex

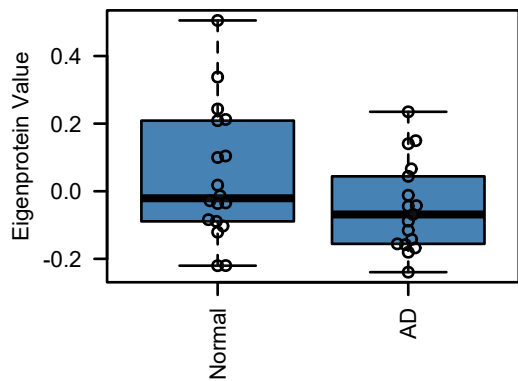

**MEsteelblue.Brain (Synthetic)**  
ANOVA p: 0.015

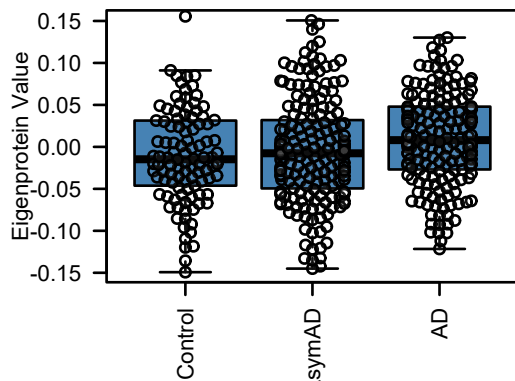

**MEsteelblue.Brain (Synthetic)**  
ANOVA p: 0.075

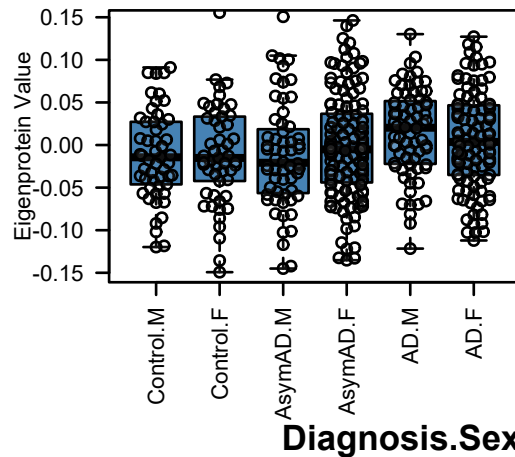

**bicor=-0.14, p=0.0027**  
**cor=-0.13, p=0.004**

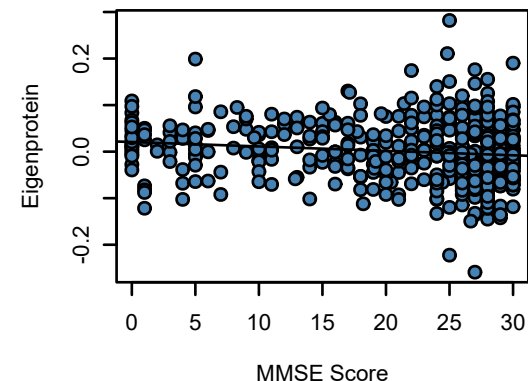

**M25 orange.CSF38**  
Ambiguous

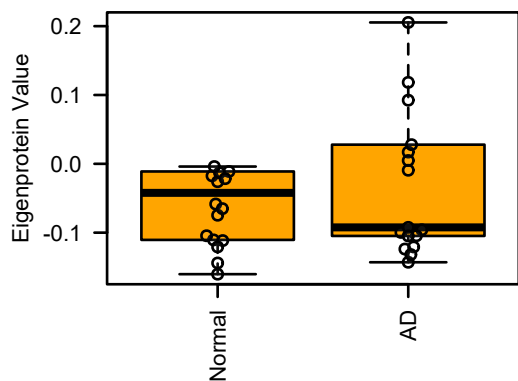

**MEorange.Brain (Synthetic)**  
ANOVA p: 0.24

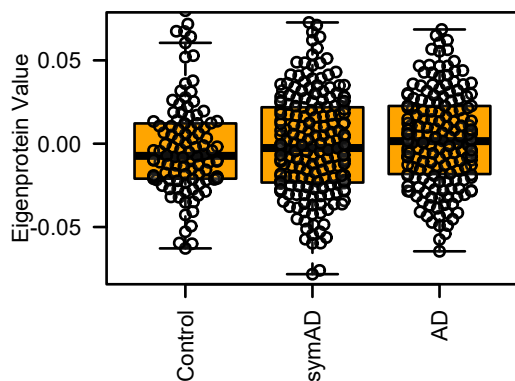

**MEorange.Brain (Synthetic)**  
ANOVA p: 0.082

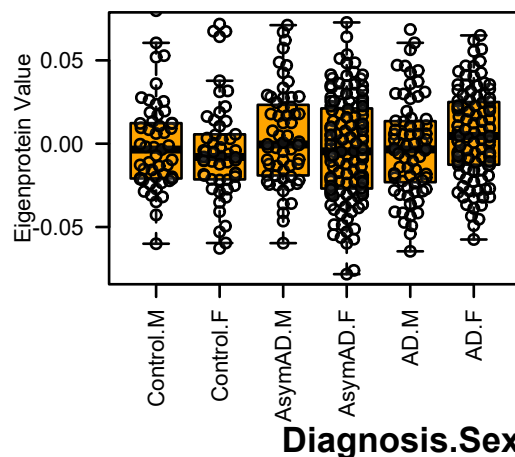

**bicor=-0.082, p=0.071**  
**cor=-0.093, p=0.04**

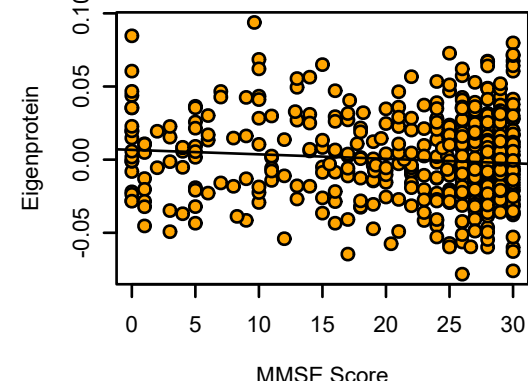

**M5 green.CSF38**  
Compound Metabolism/Heat Shock Protein Bi

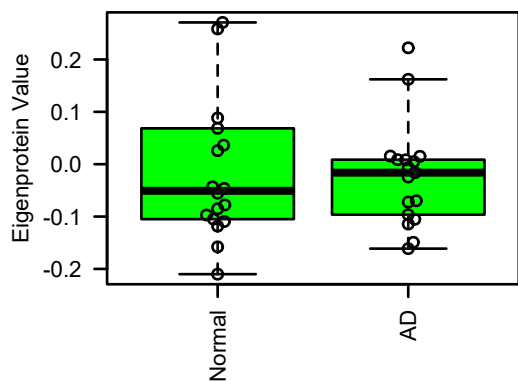

**MEgreen.Brain (Synthetic)**  
ANOVA p: 1.5e-12

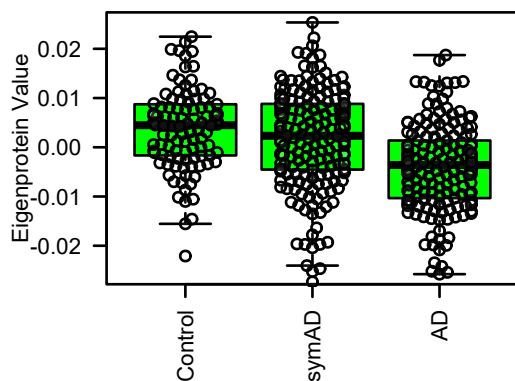

**MEgreen.Brain (Synthetic)**  
ANOVA p: 1.1e-10

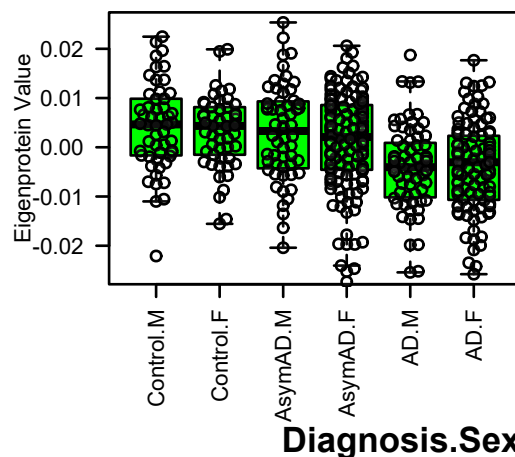

**bicor=0.29, p=1.4e-10**  
**cor=0.28, p=3.1e-10**

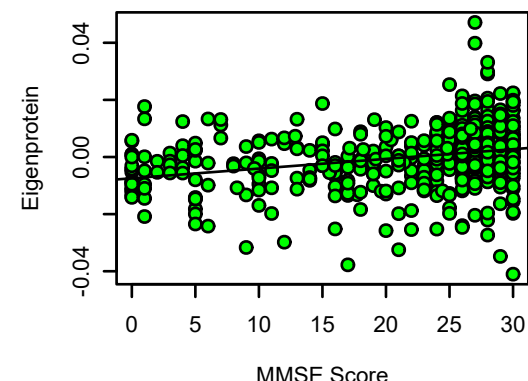

**M37 skyblue3.CSF38**  
RNA Binding/Metabolism

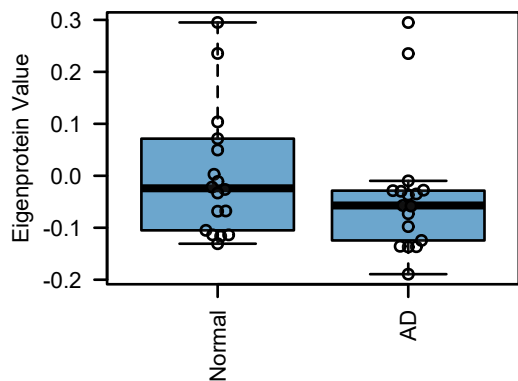

**MEskyblue3.Brain (Synthetic)**  
ANOVA p: 0.32

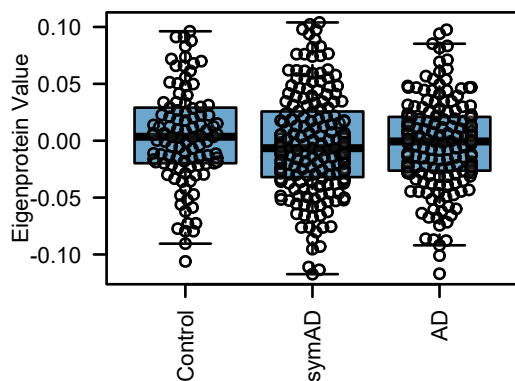

**MEskyblue3.Brain (Synthetic)**  
ANOVA p: 0.42

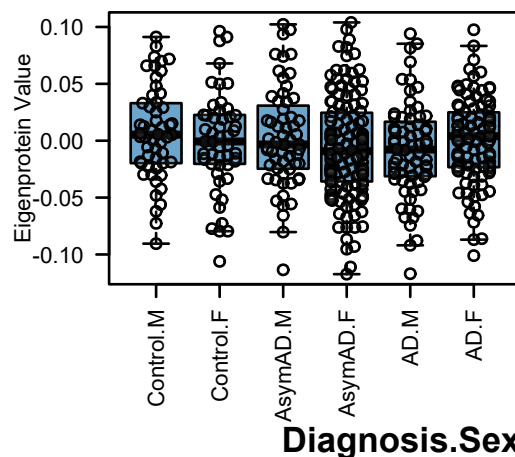

**bicor=0.03, p=0.51**  
**cor=-0.003, p=0.95**

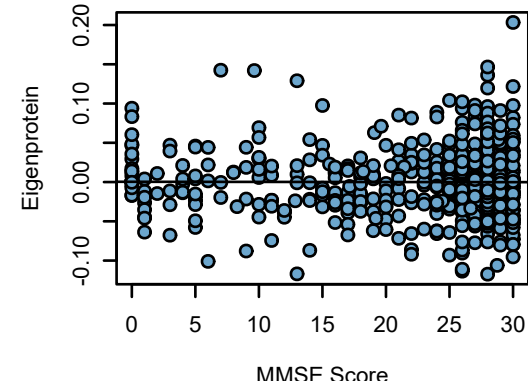



**M34 darkmagenta.CSF38**  
Cofactor Biosynthesis

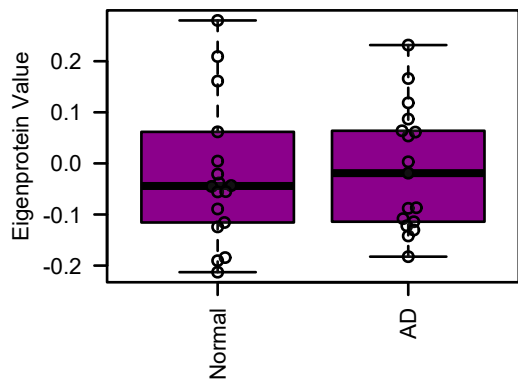

**MEdarkmagenta.Brain (Synthetic)**  
ANOVA p: 0.0017

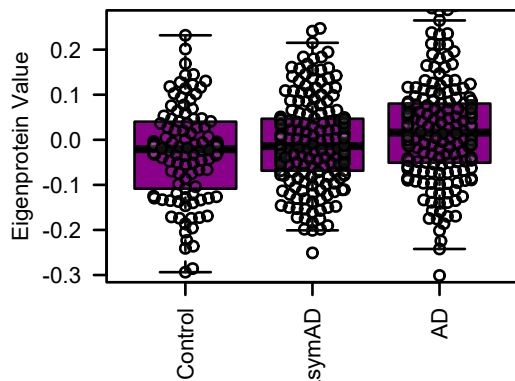

**MEdarkmagenta.Brain (Synthetic)**  
ANOVA p: 0.0058

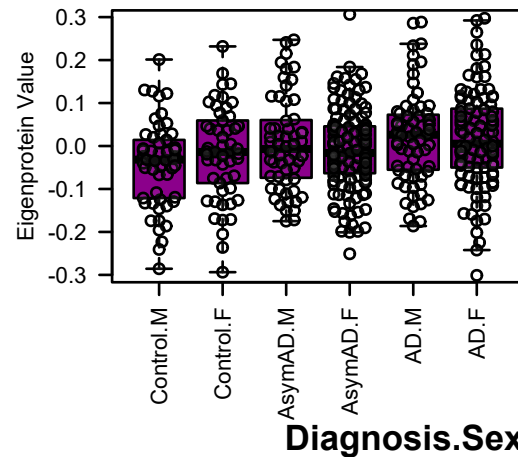

**bicor=-0.11, p=0.012**  
**cor=-0.18, p=6.4e-05**

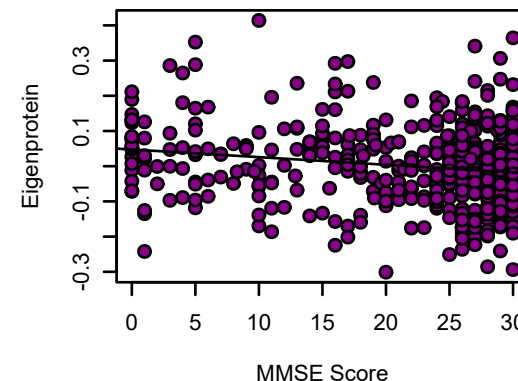

**M28 skyblue.CSF38**  
Proteasome

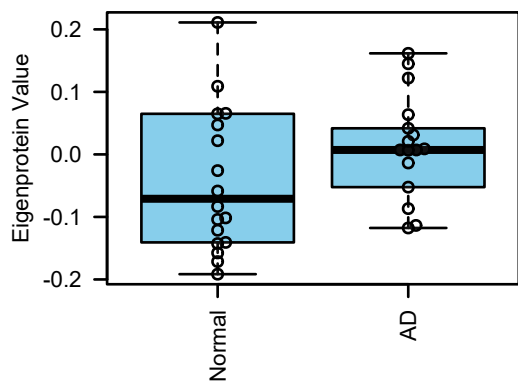

**MEskyblue.Brain (Synthetic)**  
ANOVA p: 6.6e-05

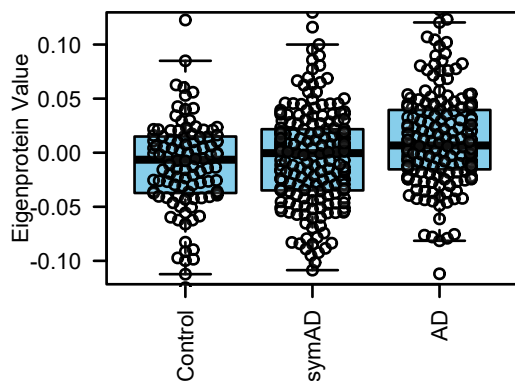

**MEskyblue.Brain (Synthetic)**  
ANOVA p: 0.00057

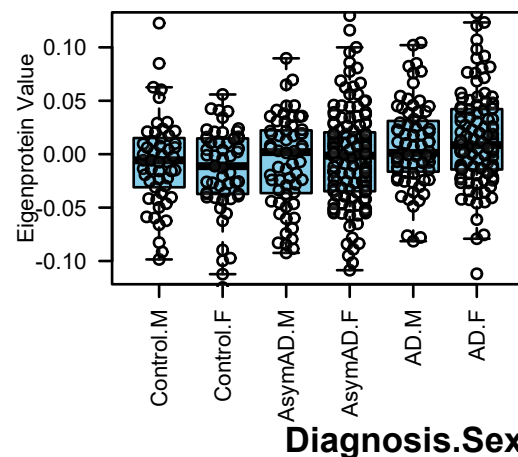

**bicor=-0.16, p=0.00051**  
**cor=-0.23, p=2.8e-07**

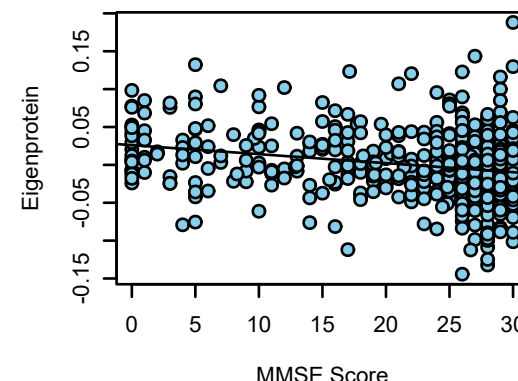

**M16 lightcyan.CSF38**  
Sugar Metabolism

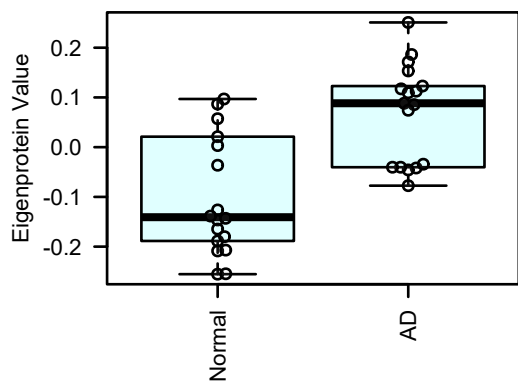

**MElightcyan.Brain (Synthetic)**  
ANOVA p: 0.29

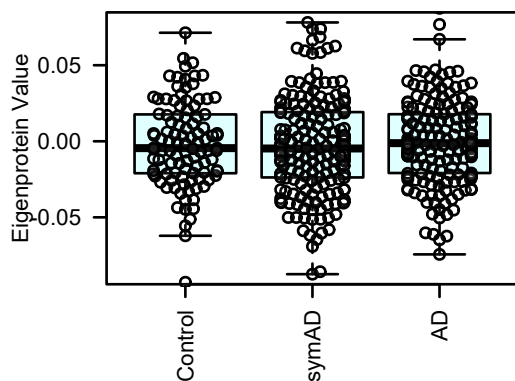

**MElightcyan.Brain (Synthetic)**  
ANOVA p: 0.014

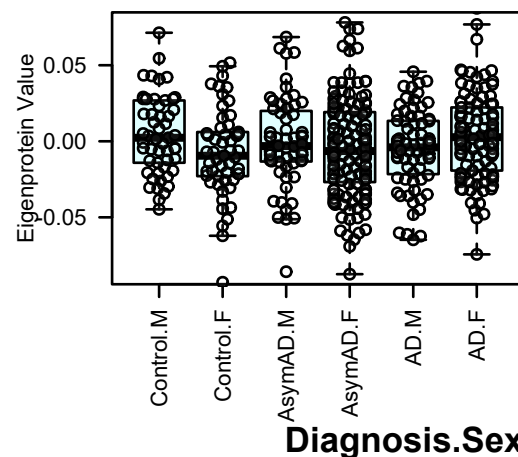

**bicor=-0.045, p=0.33**  
**cor=-0.039, p=0.39**

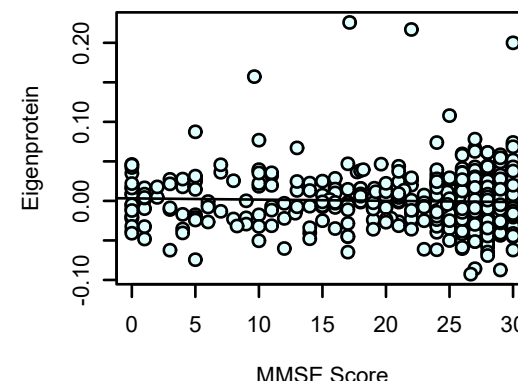

**M29 saddlebrown.CSF38**  
Sugar Metabolism/Actin Depolymerizator

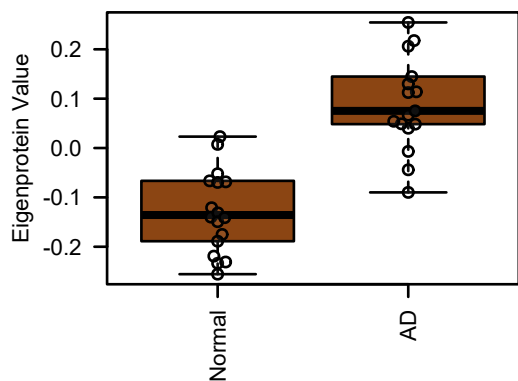

**MEsaddlebrown.Brain (Synthetic)**  
ANOVA p: 0.53

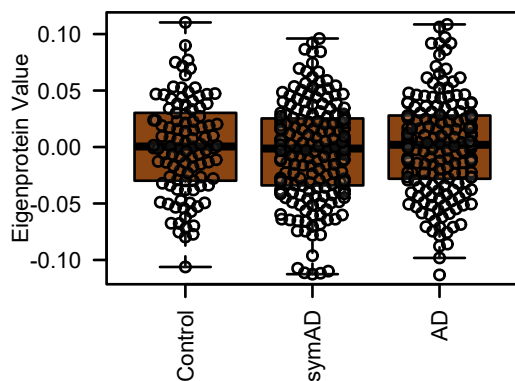

**MEsaddlebrown.Brain (Synthetic)**  
ANOVA p: 0.12

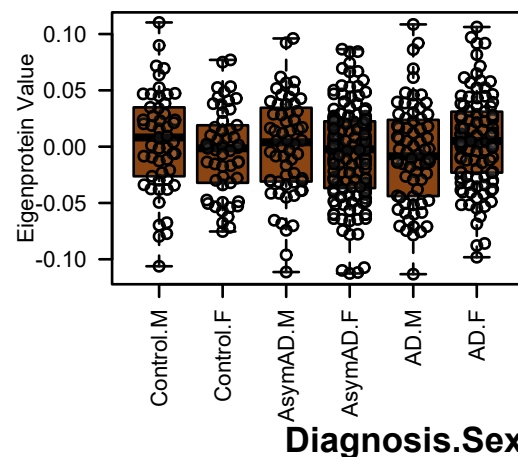

**bicor=-0.012, p=0.79**  
**cor=-0.035, p=0.44**

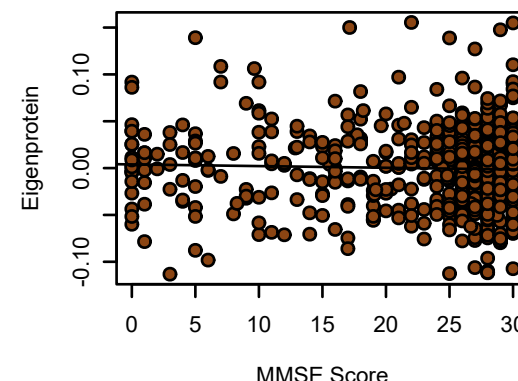

**M24 darkgrey.CSF38**  
Ubiquitination

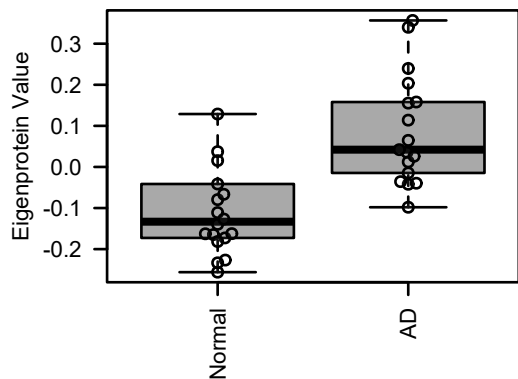

**MEdarkgrey.Brain (Synthetic)**  
ANOVA p: 0.039

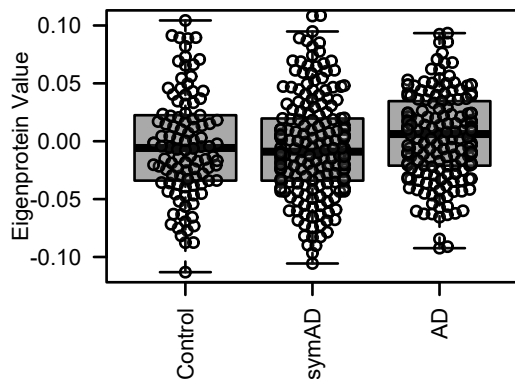

**MEdarkgrey.Brain (Synthetic)**  
ANOVA p: 0.045

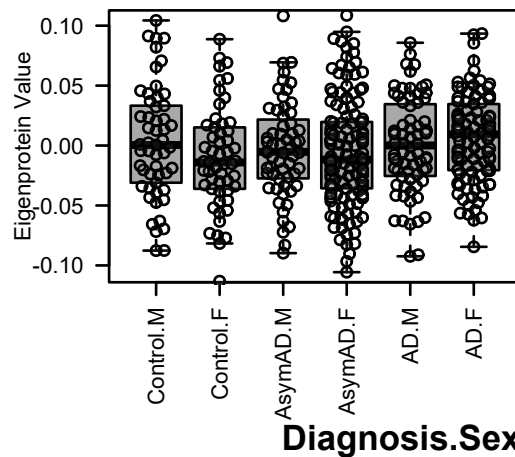

**Diagnosis.Sex**

**bicor=-0.066, p=0.14**  
**cor=-0.12, p=0.008**

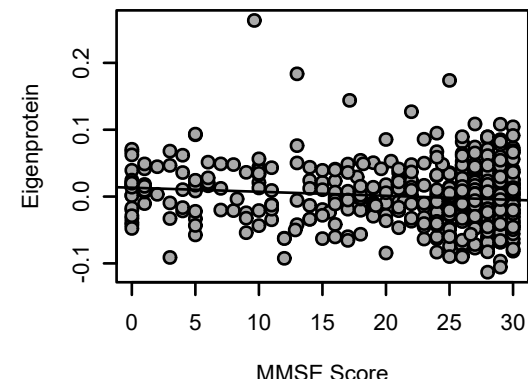

**M35 sienna3.CSF38**  
Ambiguous

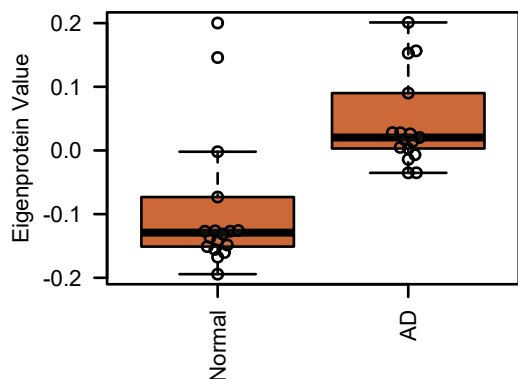

**MEsienna3.Brain (Synthetic)**  
ANOVA p: 0.0044

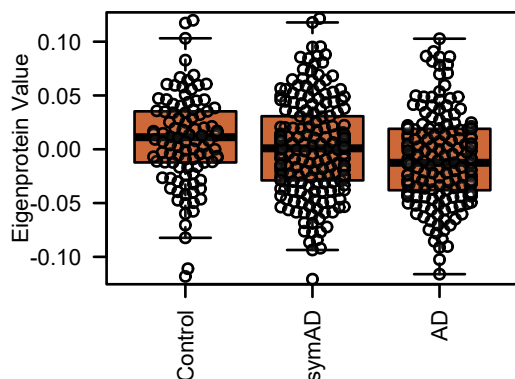

**MEsienna3.Brain (Synthetic)**  
ANOVA p: 5e-04

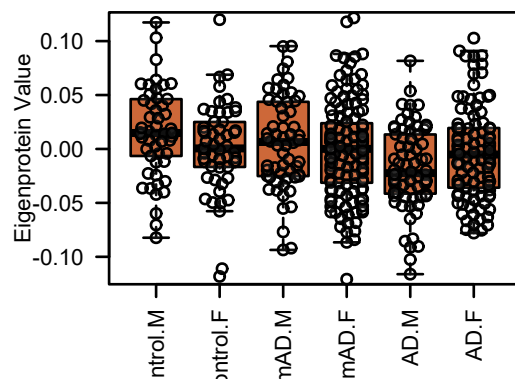

**Diagnosis.Sex**

**bicor=0.12, p=0.01**  
**cor=0.14, p=0.0019**

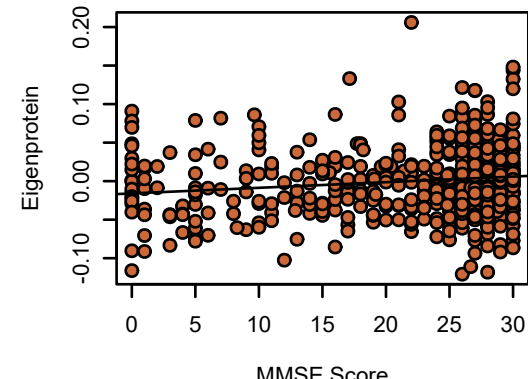

**M33 darkolivegreen.CSF38**  
Translation/Sugar Binding

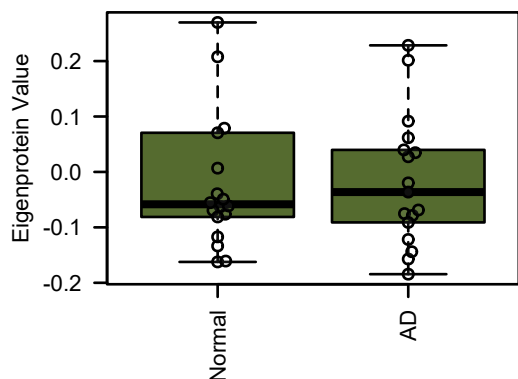

**MEdarkolivegreen.Brain (Synthetic)**  
ANOVA p: 0.97

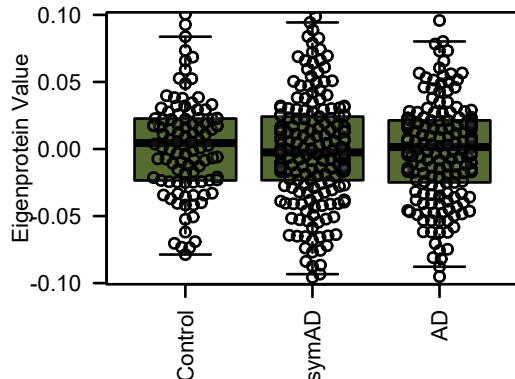

**MEdarkolivegreen.Brain (Synthetic)**  
ANOVA p: 0.8

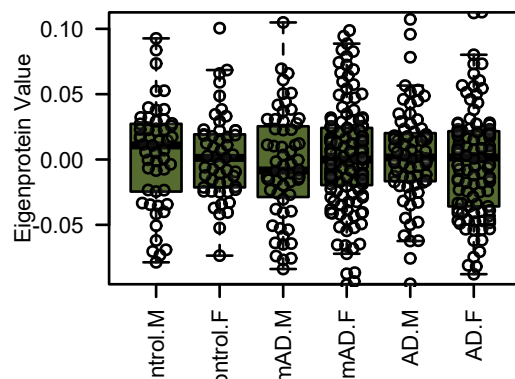

**Diagnosis.Sex**

**bicor=0.0098, p=0.83**  
**cor=-0.011, p=0.81**

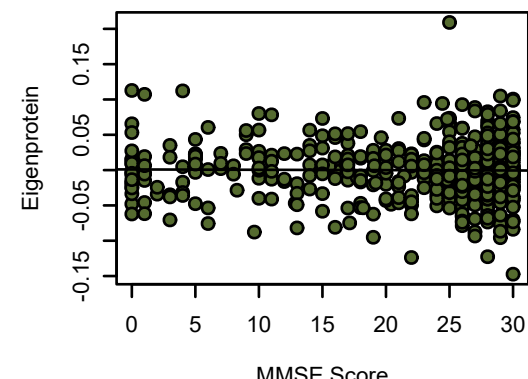

**M36 yellowgreen.CSF38**  
Organelle Organization/Biogenesis

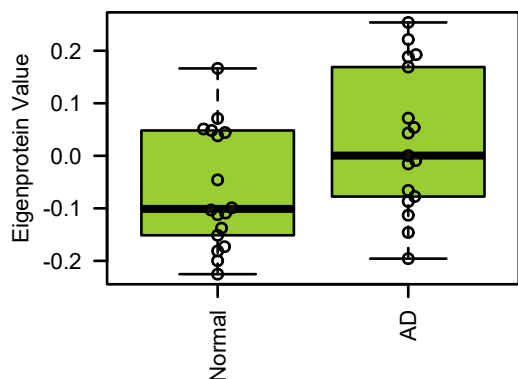

**MEyellowgreen.Brain (Synthetic)**  
ANOVA p: 8.9e-05

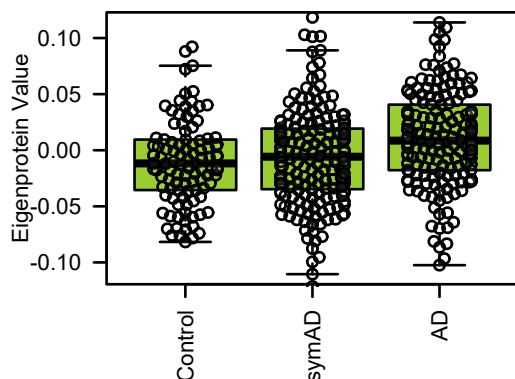

**MEyellowgreen.Brain (Synthetic)**  
ANOVA p: 4e-04

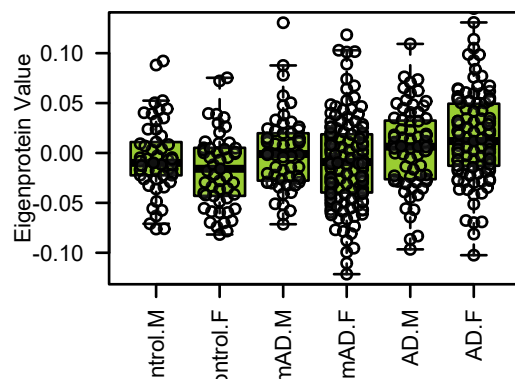

**Diagnosis.Sex**

**bicor=-0.15, p=0.001**  
**cor=-0.23, p=2.8e-07**

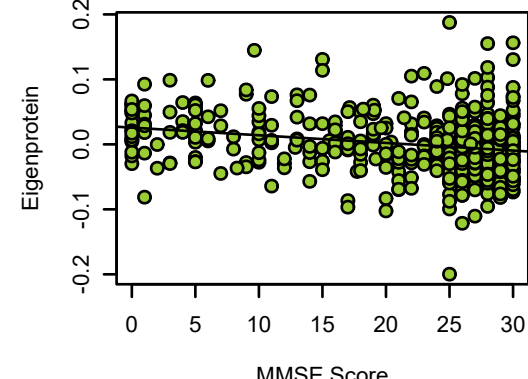

**M1 turquoise.CSF38**  
Immune Response

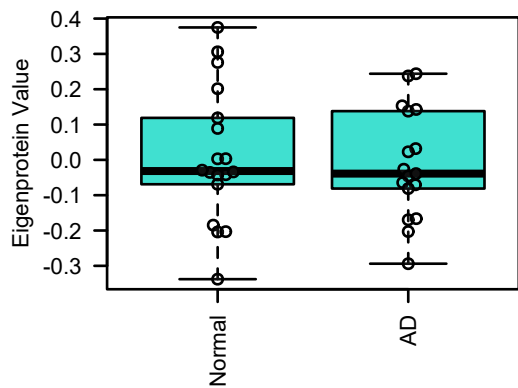

**MEturquoise.Brain (Synthetic)**  
ANOVA p: 6.1e-14

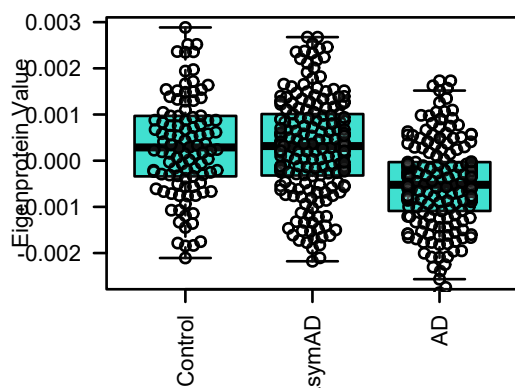

**MEturquoise.Brain (Synthetic)**  
ANOVA p: 1.3e-12

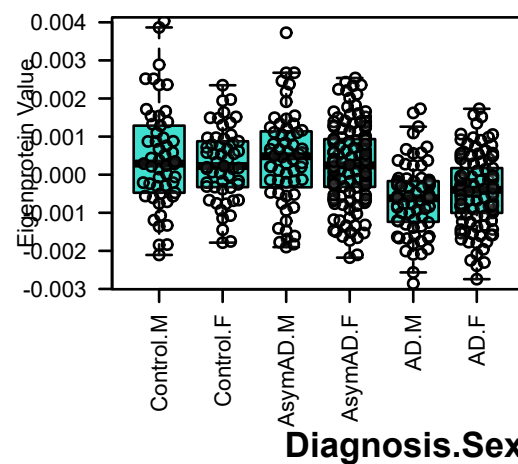

**bicor=0.27, p=1.1e-09**  
**cor=0.34, p=1.1e-14**

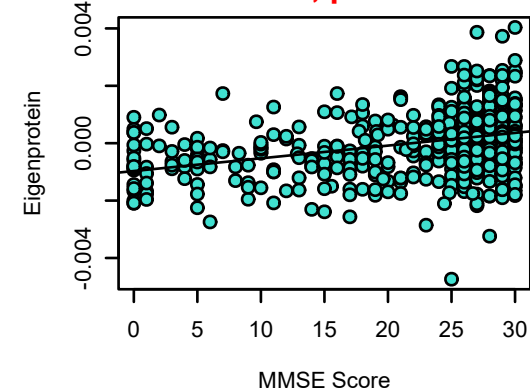

**M4 yellow.CSF38**  
Lysosome

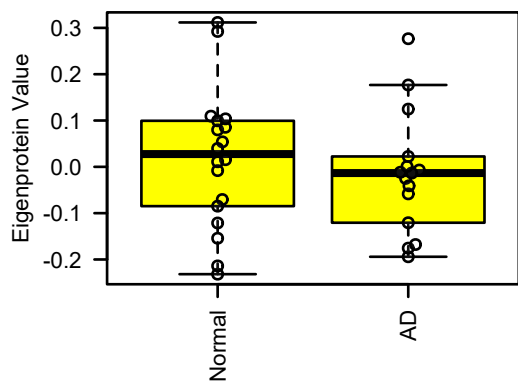

**MEyellow.Brain (Synthetic)**  
ANOVA p: 0.015

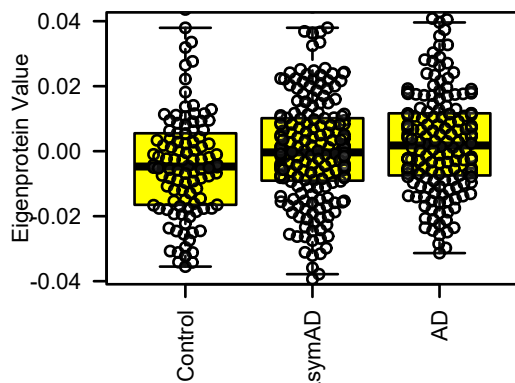

**MEyellow.Brain (Synthetic)**  
ANOVA p: 0.069

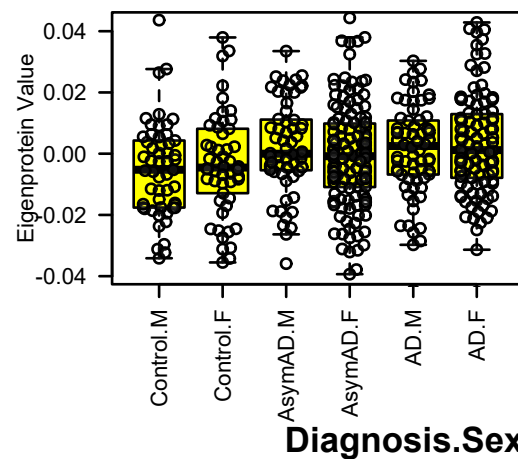

**bicor=-0.1, p=0.027**  
**cor=-0.11, p=0.015**

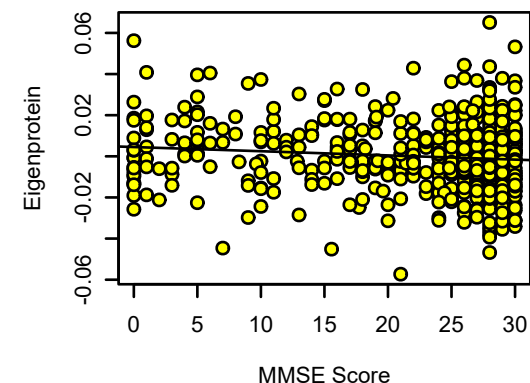

**M23 darkturquoise.CSF38**  
Nucleic Acid/Steroid Metabolism

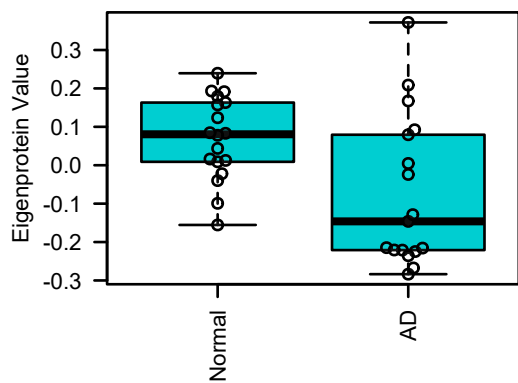

**MEdarkturquoise.Brain (Synthetic)**  
ANOVA p: 5.5e-05

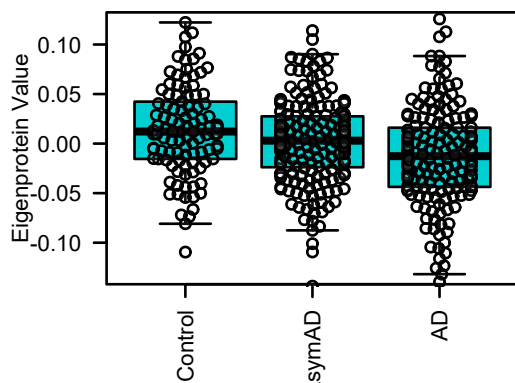

**MEdarkturquoise.Brain (Synthetic)**  
ANOVA p: 0.00029

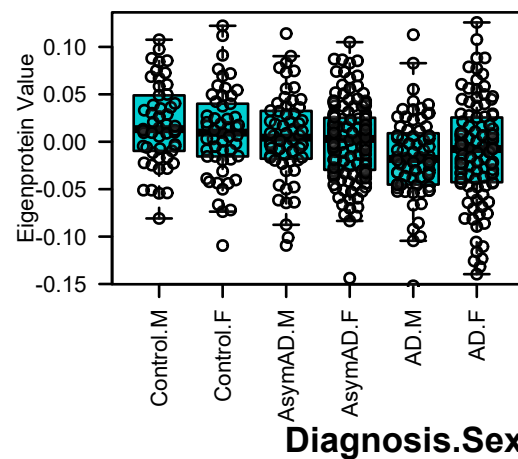

**bicor=0.17, p=0.00011**  
**cor=0.19, p=2.4e-05**

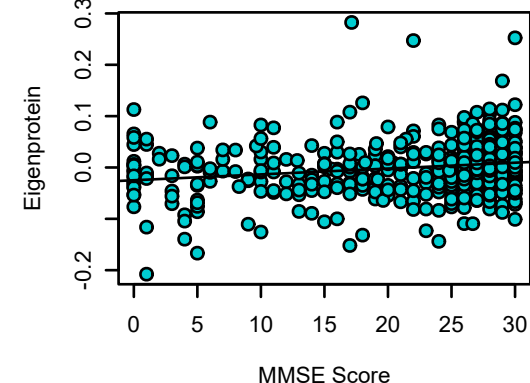

**M20 royalblue.CSF38**  
Ambiguous

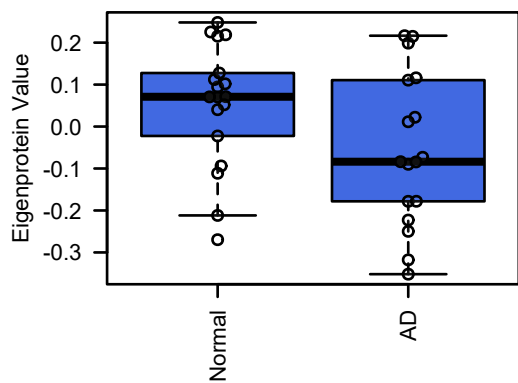

**MEroyalblue.Brain (Synthetic)**  
ANOVA p: 0.81

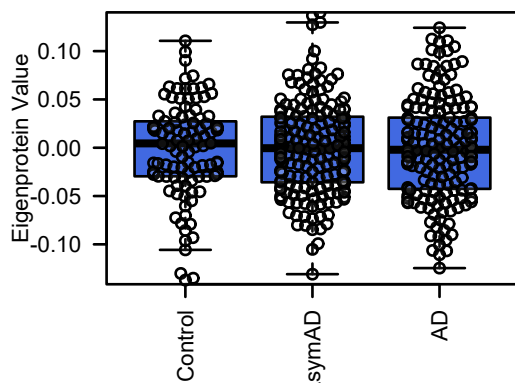

**MEroyalblue.Brain (Synthetic)**  
ANOVA p: 0.42

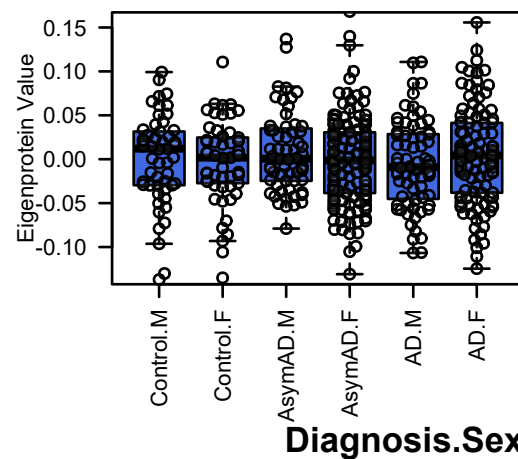

**bicor=-0.0036, p=0.94**  
**cor=0.0063, p=0.89**

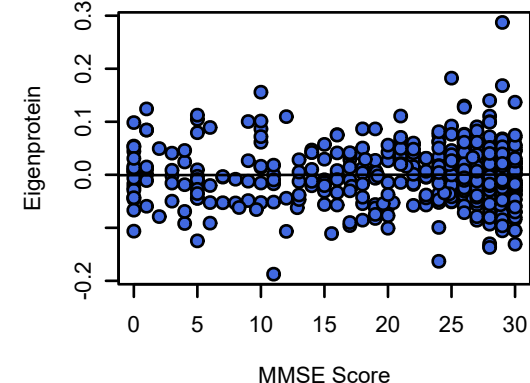

**M22 darkgreen.CSF38**  
ECM/Actin Binding

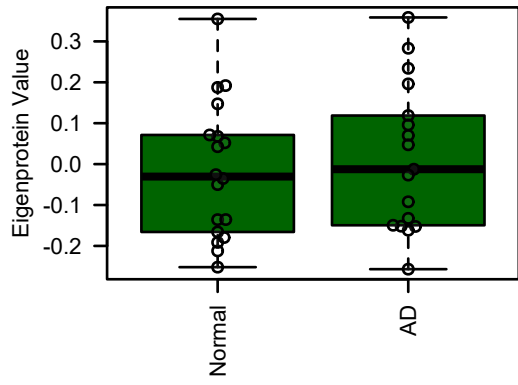

**MEdarkgreen.Brain (Synthetic)**  
ANOVA p: 4.2e-05

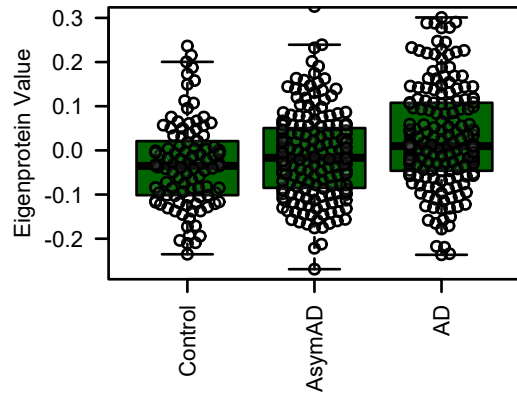

**MEdarkgreen.Brain (Synthetic)**  
ANOVA p: 0.00093

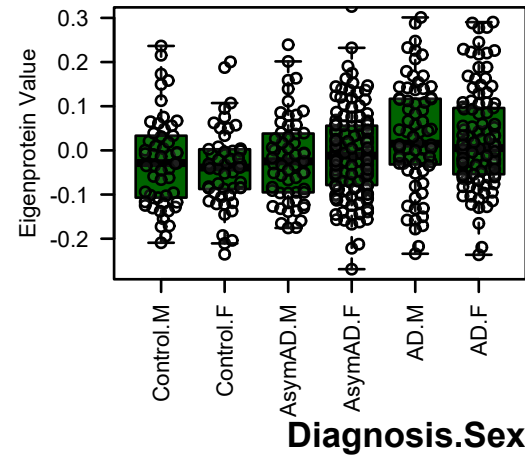

**bicor=-0.14, p=0.0014**  
**cor=-0.22, p=9.2e-07**

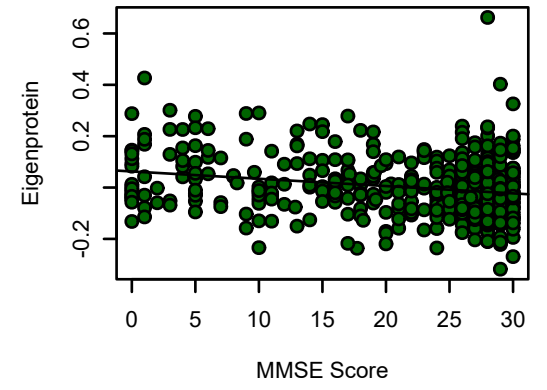

**M3 brown.CSF38**  
Complement/Protein Activation Cascade

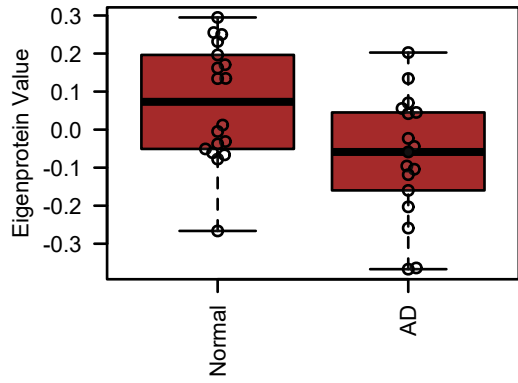

**MEbrown.Brain (Synthetic)**  
ANOVA p: 0.052

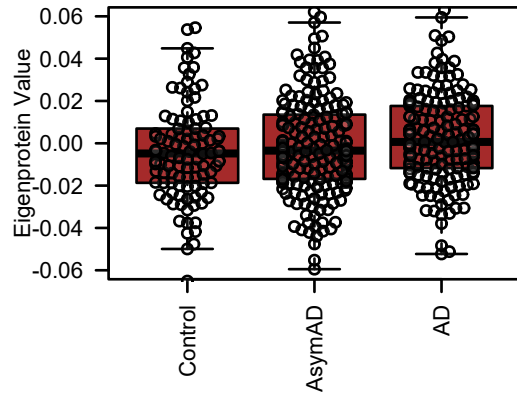

**MEbrown.Brain (Synthetic)**  
ANOVA p: 0.17

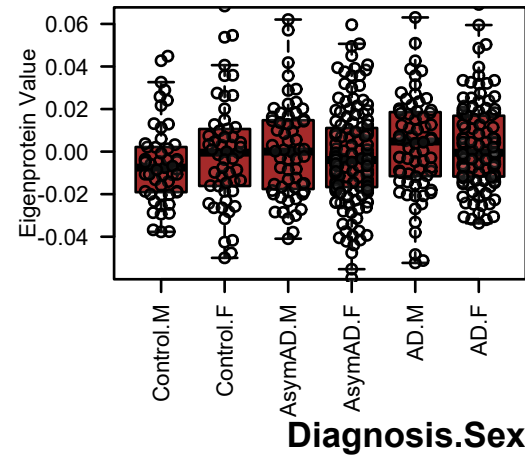

**bicor=-0.097, p=0.033**  
**cor=-0.12, p=0.008**

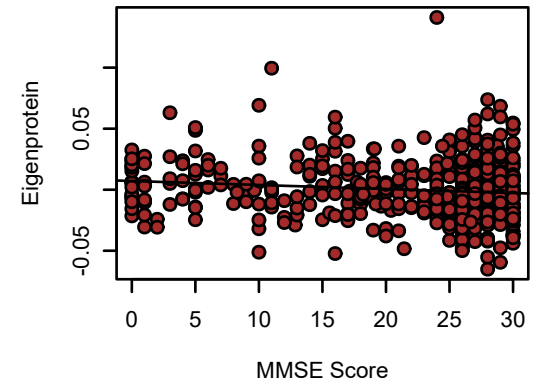

**M10 purple.CSF38**  
Ossification/Bone Development

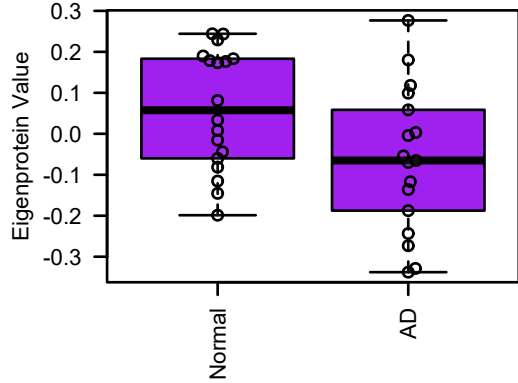

**MEpurple.Brain (Synthetic)**  
ANOVA p: 0.00053

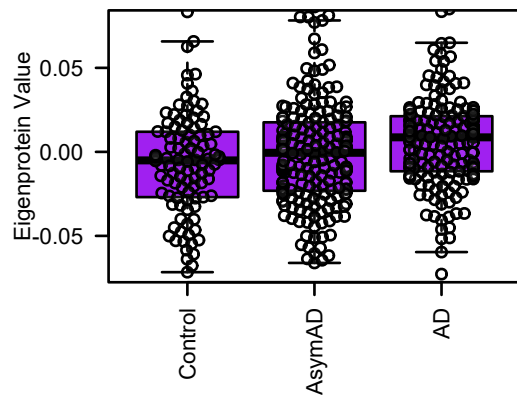

**MEpurple.Brain (Synthetic)**  
ANOVA p: 0.0025

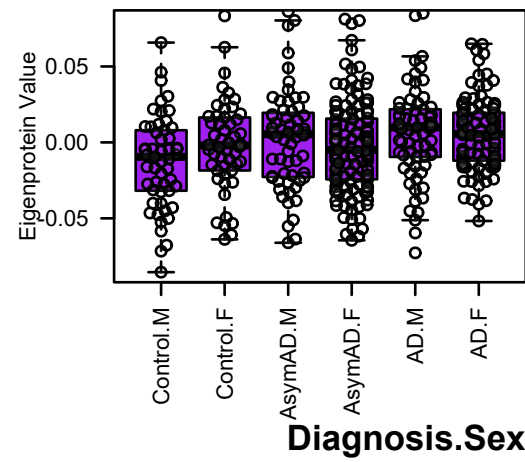

**bicor=-0.13, p=0.0046**  
**cor=-0.16, p=0.00039**

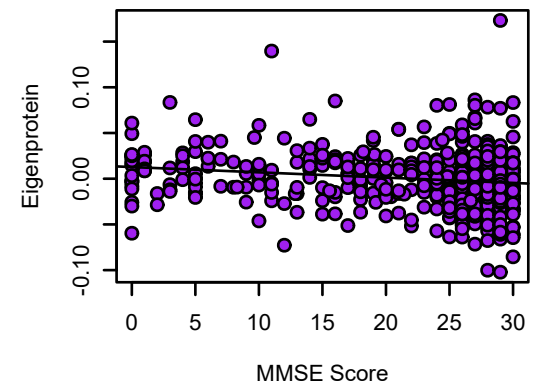

**M11 greenyellow.CSF38**  
**Ambiguous**



**MEgreenyellow.Plasma 35 Samp. (Synthetic)**  
**ANOVA p: 0.0017**

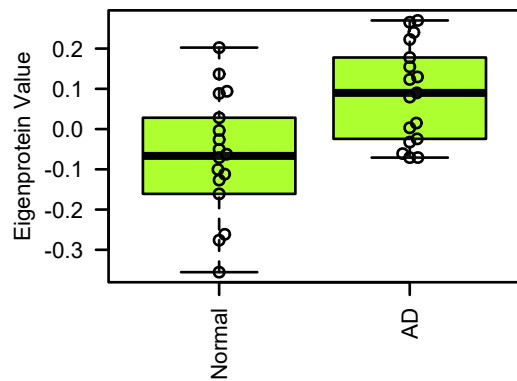

**MEgreenyellow.Plasma (Synthetic)**  
**ANOVA p: 0.0036**

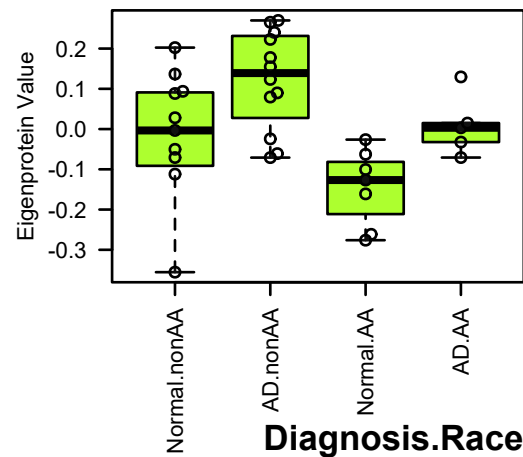

**MEgreenyellow.Plasma (Synthetic)**  
**ANOVA p: 0.018**

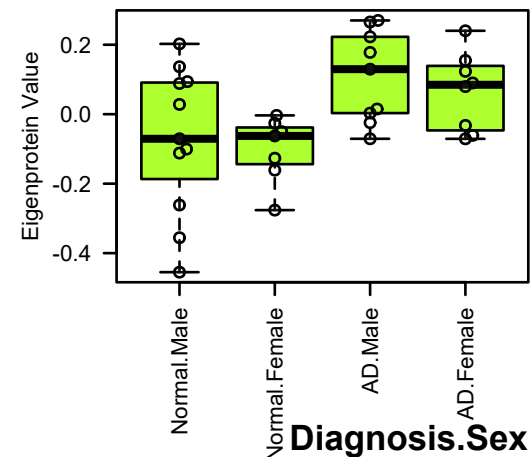

**bicor=-0.45, p=0.0062**  
**cor=-0.43, p=0.0099**

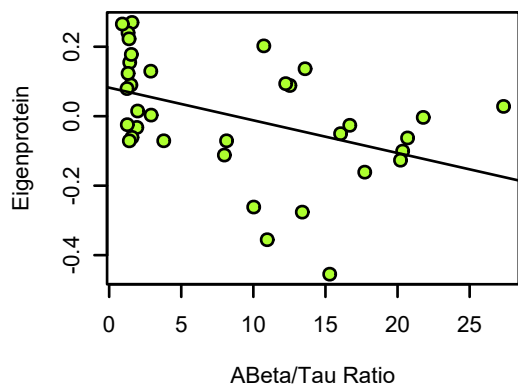

**bicor=-0.48, p=0.0068**  
**cor=-0.39, p=0.03**

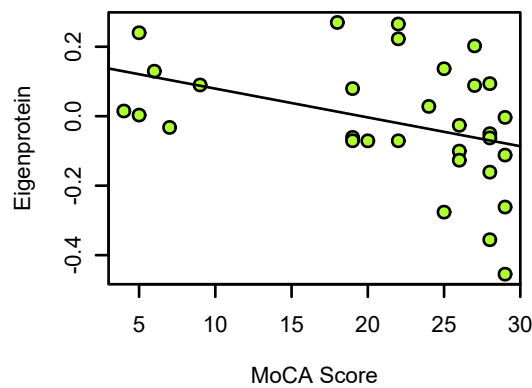

**bicor=0.27, p=0.27**  
**cor=0.34, p=0.17**

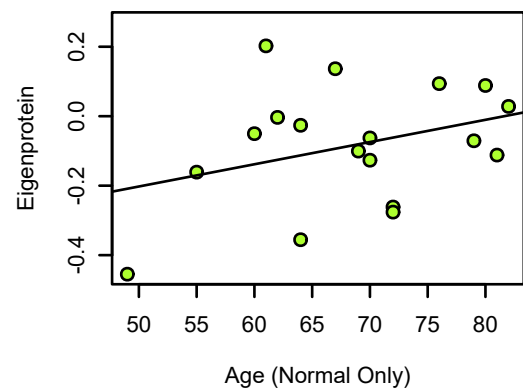

**bicor=0.22, p=0.39**  
**cor=0.23, p=0.37**

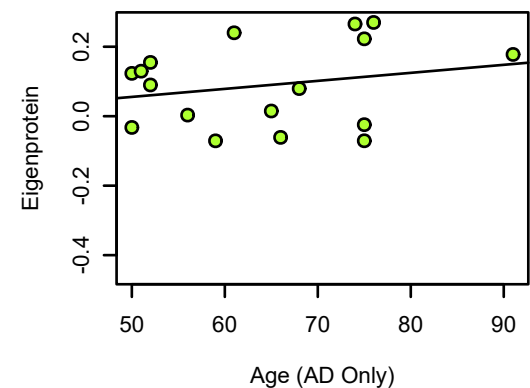

**M21 darkred.CSF38**  
**Neuron Recognition**

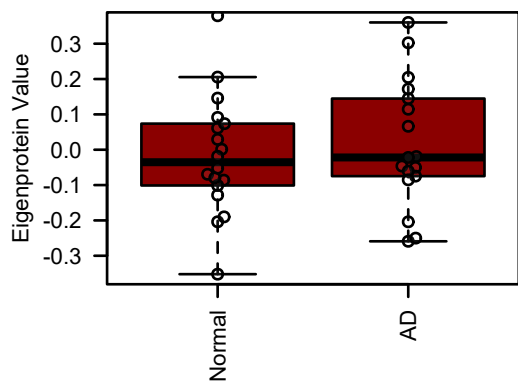

**MEdarkred.Plasma 35 Samp. (Synthetic)**  
**ANOVA p: 0.003**

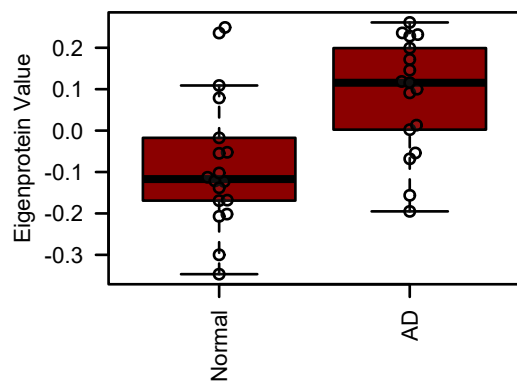

**MEdarkred.Plasma (Synthetic)**  
**ANOVA p: 0.015**

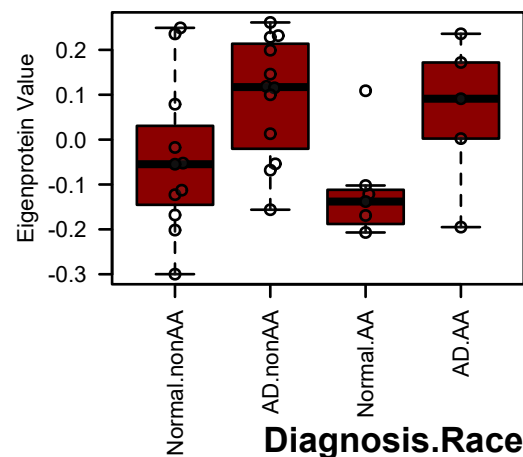

**MEdarkred.Plasma (Synthetic)**  
**ANOVA p: 0.0075**

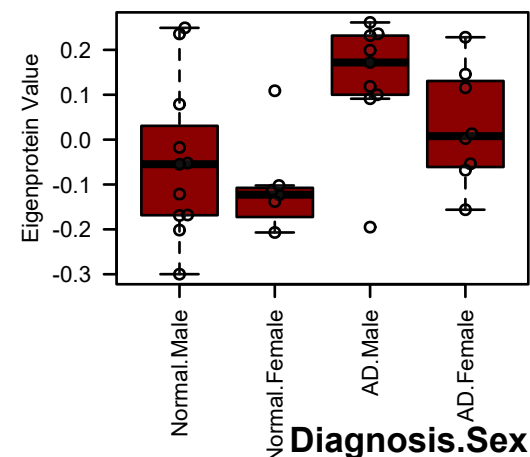

**bicor=-0.53, p=0.0011**  
**cor=-0.53, p=0.0011**

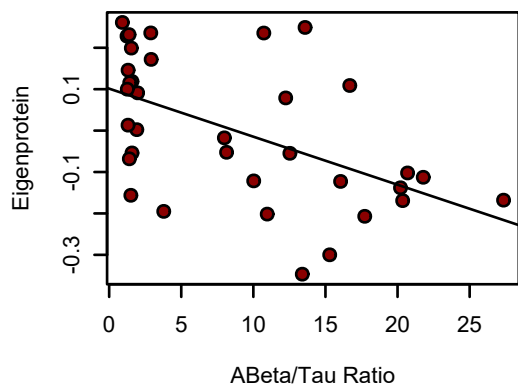

**bicor=-0.38, p=0.034**  
**cor=-0.34, p=0.061**

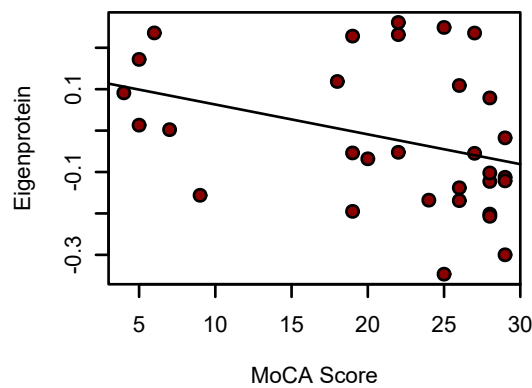

**bicor=0.21, p=0.39**  
**cor=0.14, p=0.58**

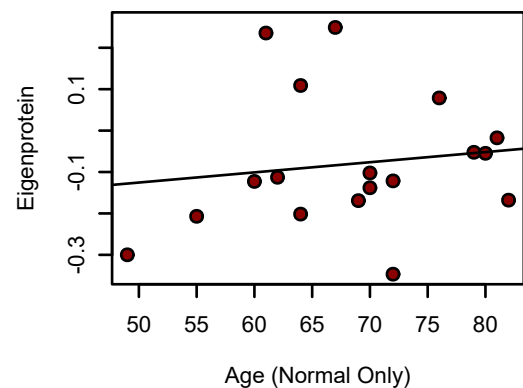

**bicor=0.22, p=0.39**  
**cor=0.2, p=0.44**

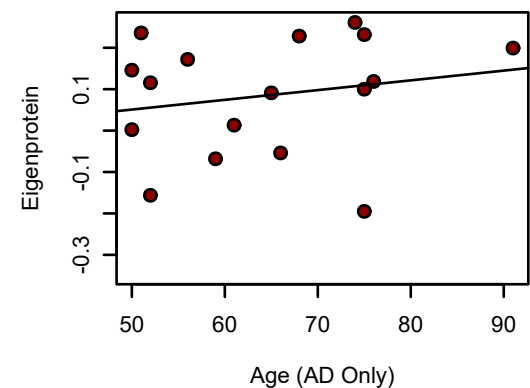

**M17 grey60.CSF38**  
**Ambiguous**

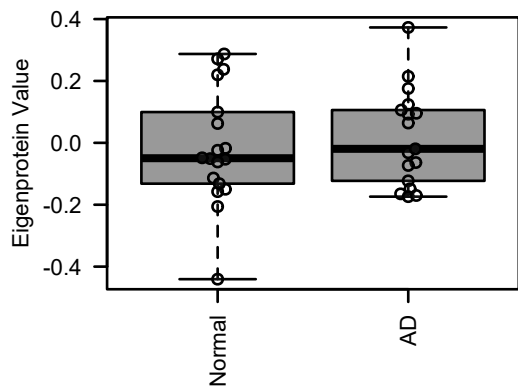

**MEgrey60.Plasma 35 Samp. (Synthetic)**  
**ANOVA p: 0.046**

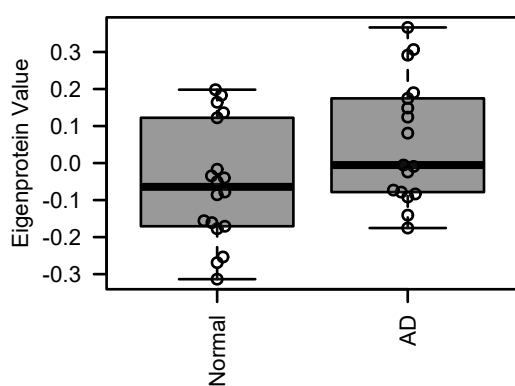

**MEgrey60.Plasma (Synthetic)**  
**ANOVA p: 0.0045**

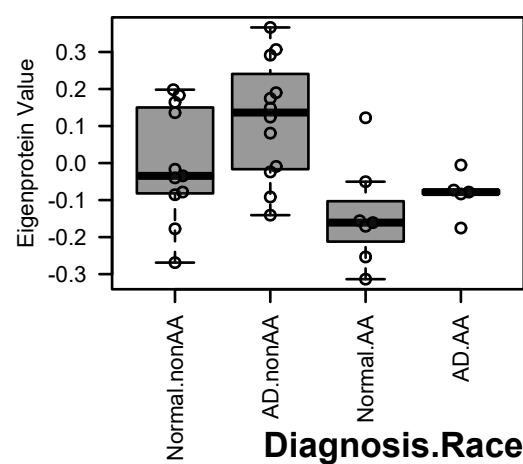

**MEgrey60.Plasma (Synthetic)**  
**ANOVA p: 0.2**

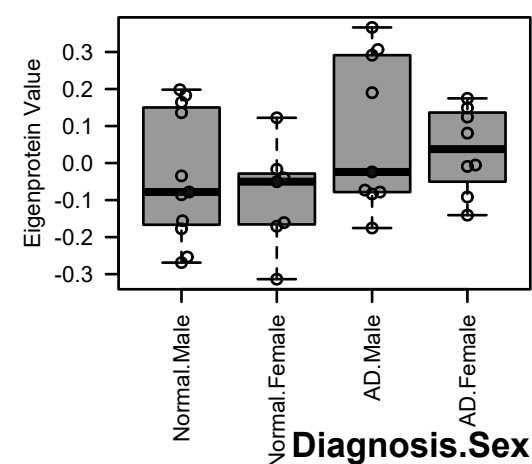

**bicor=-0.31, p=0.073**  
**cor=-0.32, p=0.061**

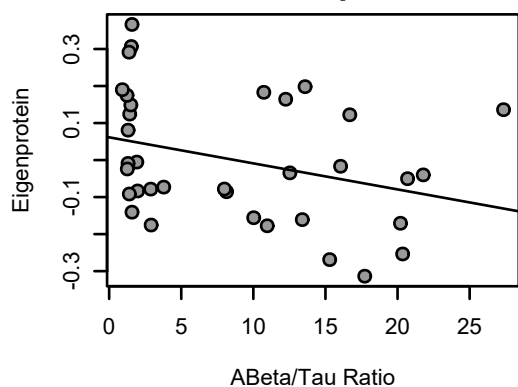

**bicor=-0.34, p=0.061**  
**cor=-0.087, p=0.64**

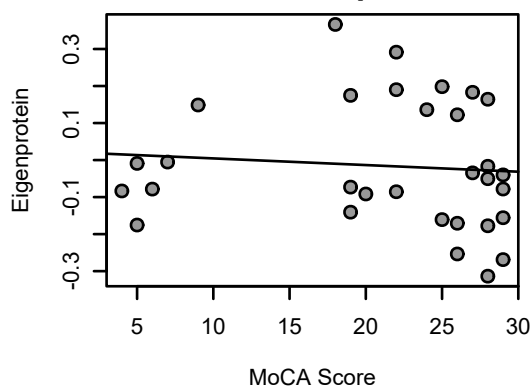

**bicor=0.27, p=0.28**  
**cor=0.3, p=0.23**

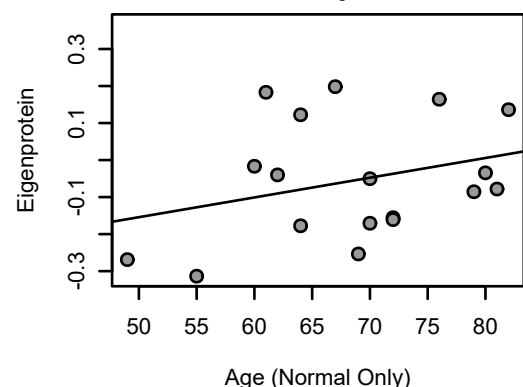

**bicor=0.39, p=0.12**  
**cor=0.47, p=0.057**

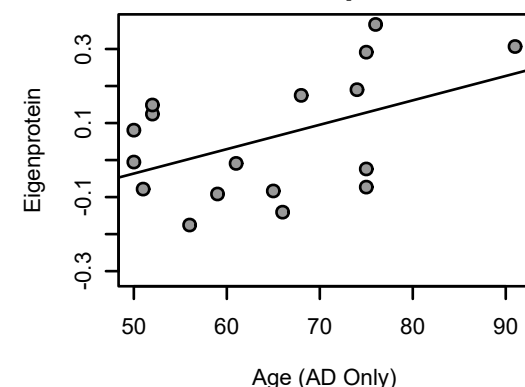

**M6 red.CSF38**  
**Muscle/Neurotransmitter Transport**

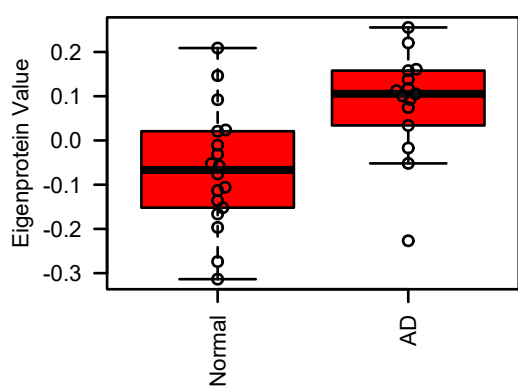

**MEred.Plasma 35 Samp. (Synthetic)**  
**ANOVA p: 0.00031**

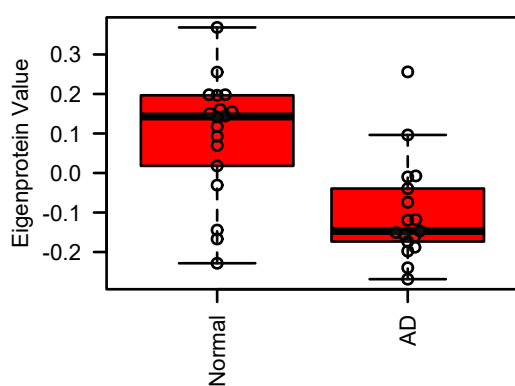

**MEred.Plasma (Synthetic)**  
**ANOVA p: 0.00086**

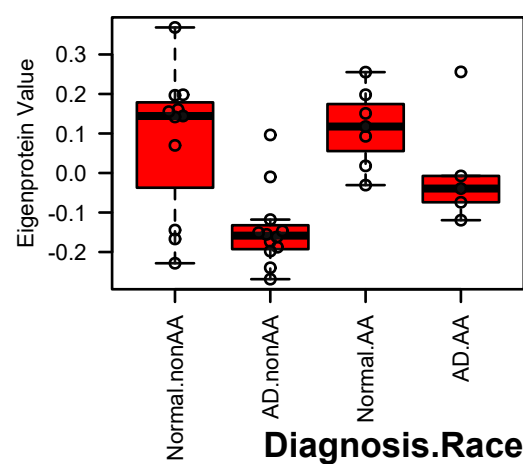

**MEred.Plasma (Synthetic)**  
**ANOVA p: 0.0038**

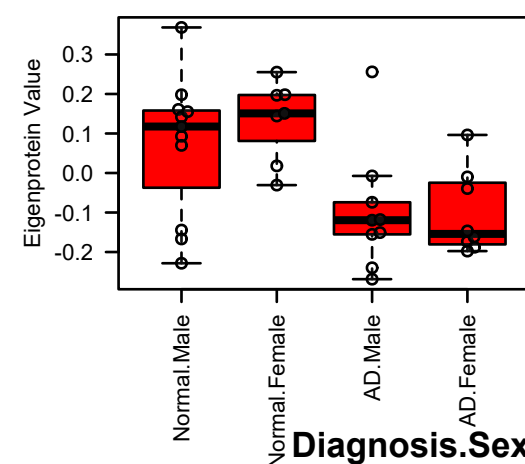

**bicor=0.58, p=0.00026**  
**cor=0.56, p=0.00047**

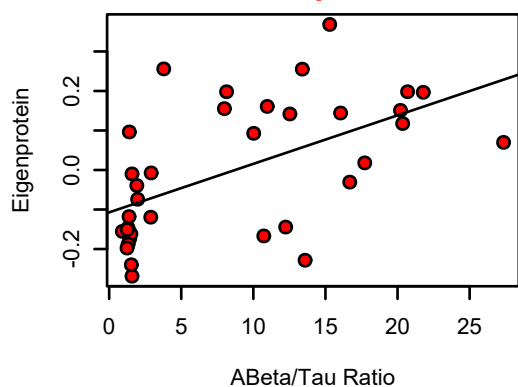

**bicor=0.46, p=0.0085**  
**cor=0.45, p=0.011**

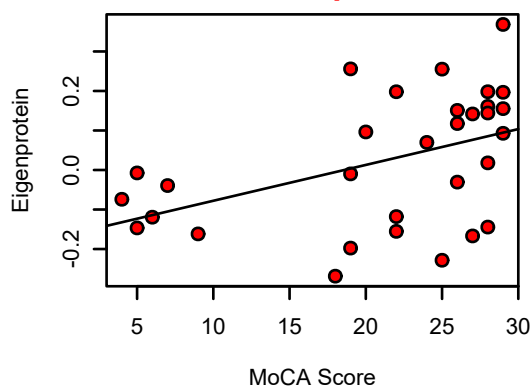

**bicor=-0.033, p=0.9**  
**cor=-0.067, p=0.79**

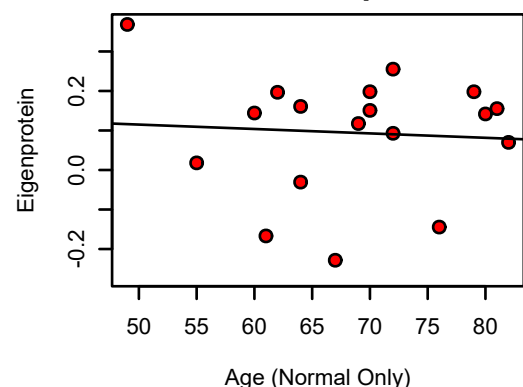

**bicor=-0.4, p=0.11**  
**cor=-0.11, p=0.67**

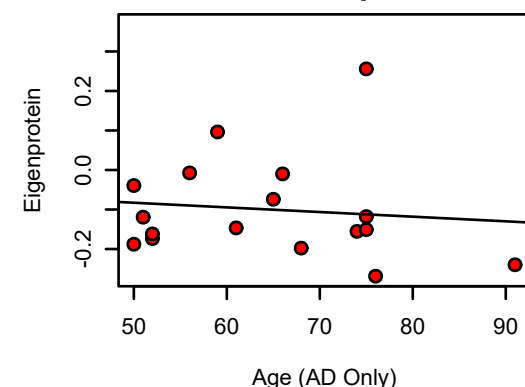

**M15 midnightblue.CSF38**  
Post-Synaptic Membrane

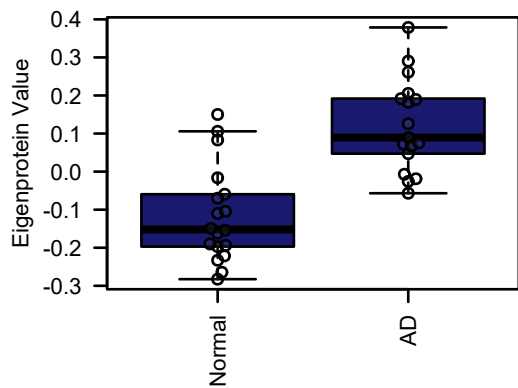

**MEmidnightblue.Plasma 35 Samp. (Synthetic)**  
ANOVA p: 1.3e-05

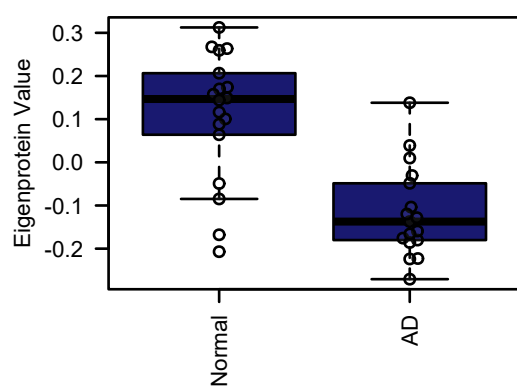

**MEmidnightblue.Plasma (Synthetic)**  
ANOVA p: 5.8e-05

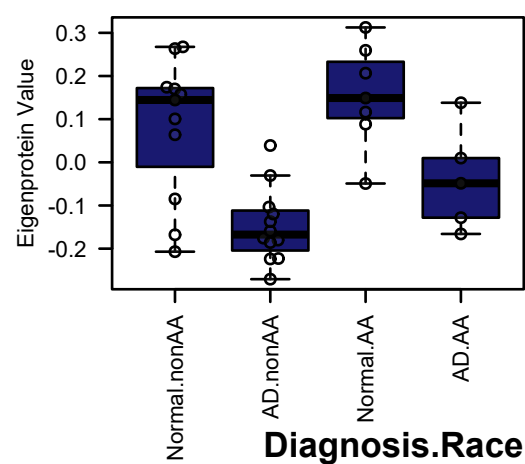

**MEmidnightblue.Plasma (Synthetic)**  
ANOVA p: 0.00025

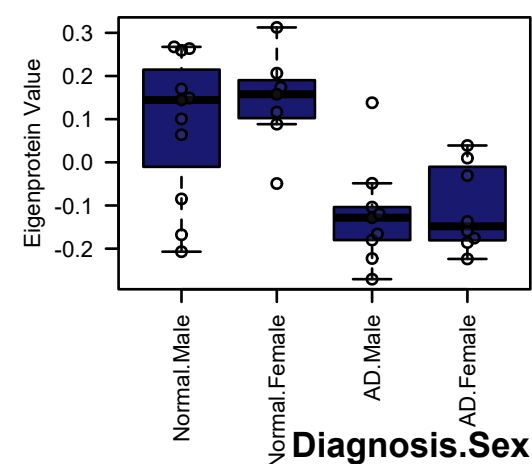

**bicor=0.65, p=2.5e-05**  
**cor=0.63, p=5e-05**

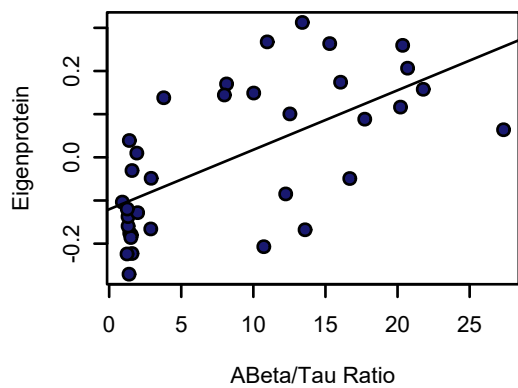

**bicor=0.58, p=0.00057**  
**cor=0.52, p=0.0027**

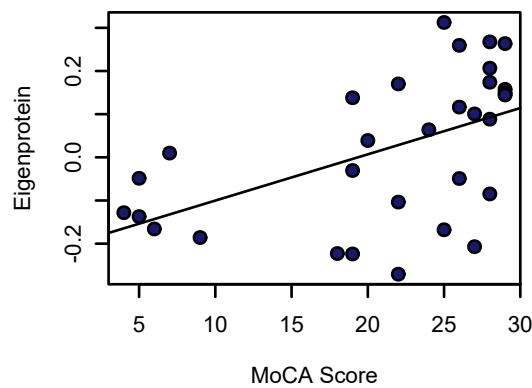

**bicor=-0.081, p=0.75**  
**cor=-0.035, p=0.89**

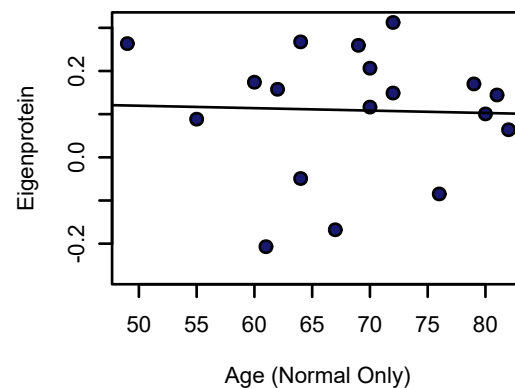

**bicor=-0.22, p=0.4**  
**cor=-0.11, p=0.67**

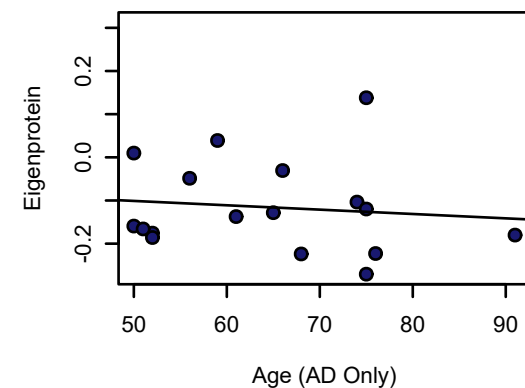

**M8 pink.CSF38**  
Autophagy

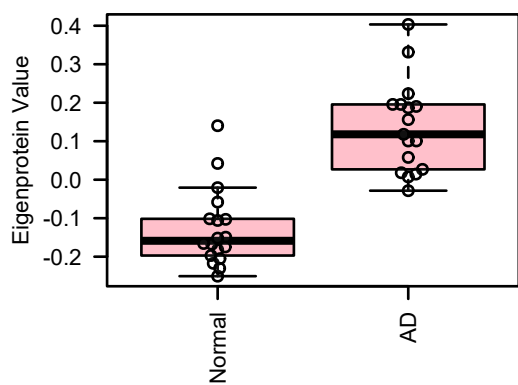

**MEpink.Plasma 35 Samp. (Synthetic)**  
ANOVA p: 1.1e-05

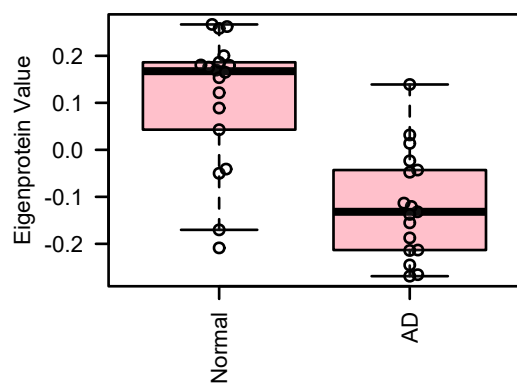

**MEpink.Plasma (Synthetic)**  
ANOVA p: 1.5e-05

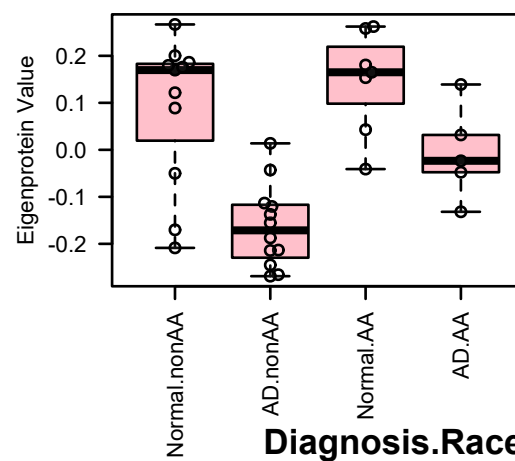

**MEpink.Plasma (Synthetic)**  
ANOVA p: 0.00024

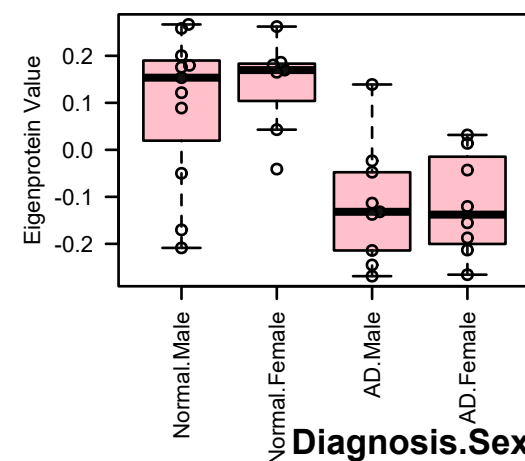

**bicor=0.66, p=1.7e-05**  
**cor=0.64, p=3.5e-05**

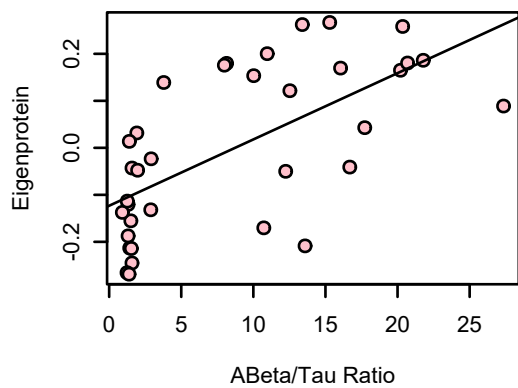

**bicor=0.57, p=0.00073**  
**cor=0.46, p=0.0092**

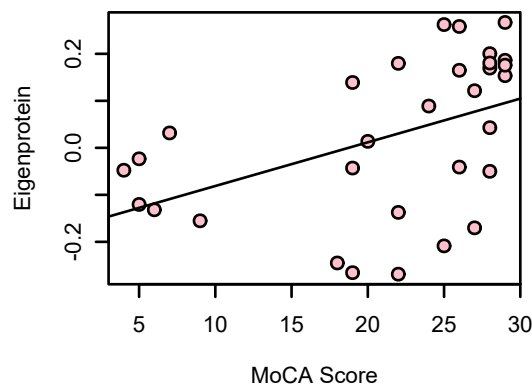

**bicor=-0.01, p=0.97**  
**cor=0.038, p=0.88**

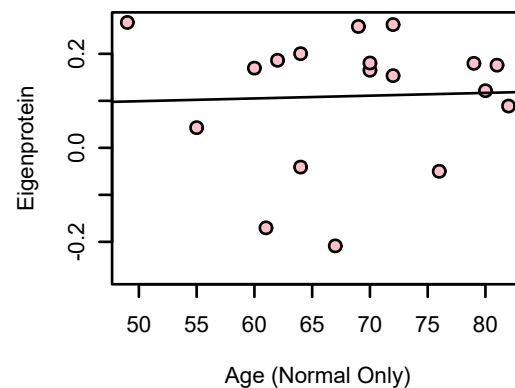

**bicor=-0.23, p=0.38**  
**cor=-0.19, p=0.47**

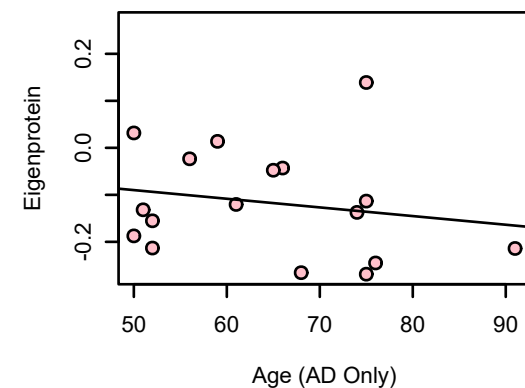

**M19 lightyellow.CSF38  
Synapse Organization**

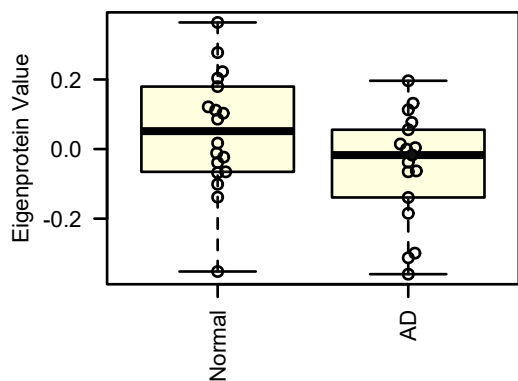

**MElightyellow.Plasma 35 Samp. (Synthetic)  
ANOVA p: 0.018**

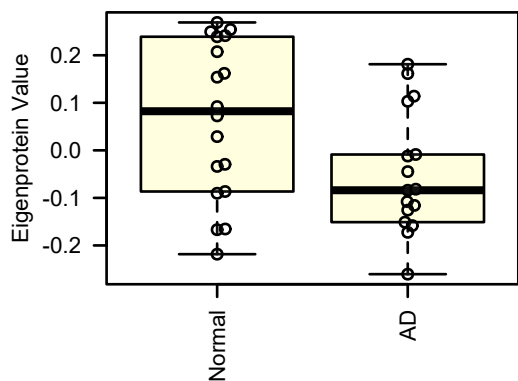

**MElightyellow.Plasma (Synthetic)  
ANOVA p: 0.0095**

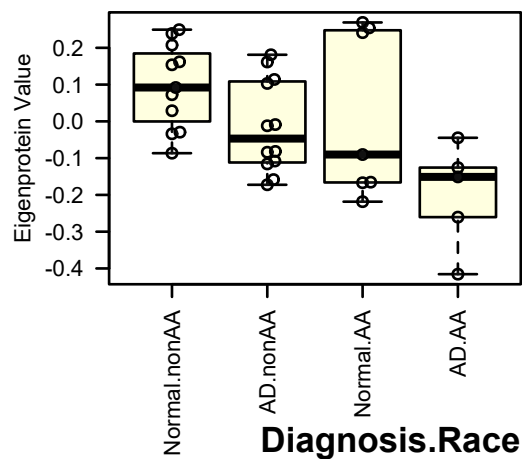

**MElightyellow.Plasma (Synthetic)  
ANOVA p: 0.042**

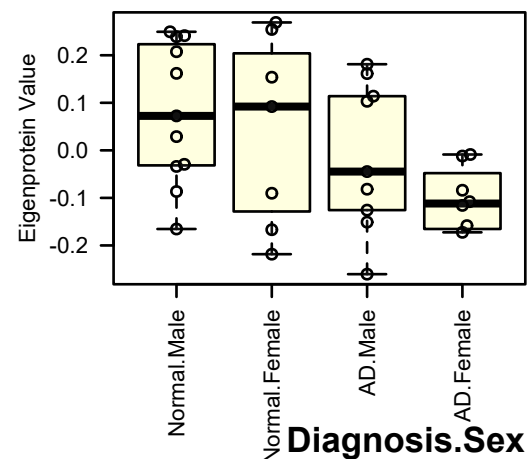

**bicor=0.3, p=0.08  
cor=0.3, p=0.08**

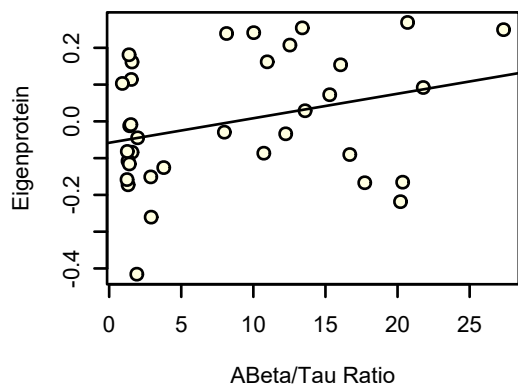

**bicor=0.29, p=0.12  
cor=0.49, p=0.0051**

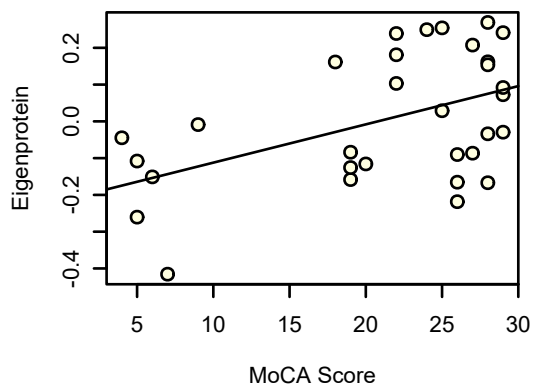

**bicor=0.35, p=0.16  
cor=0.33, p=0.18**

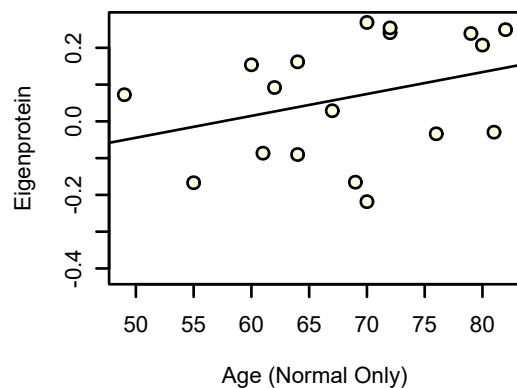

**bicor=0.62, p=0.0075  
cor=0.64, p=0.0057**

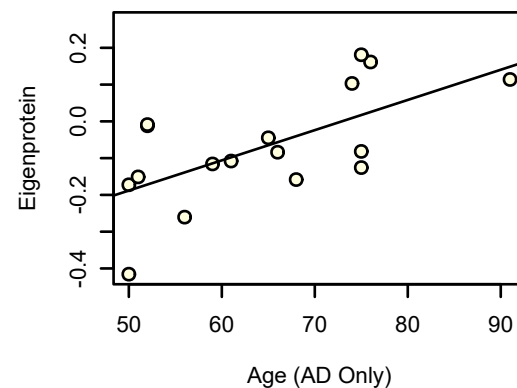

**M38 plum1.CSF38  
Ambiguous**

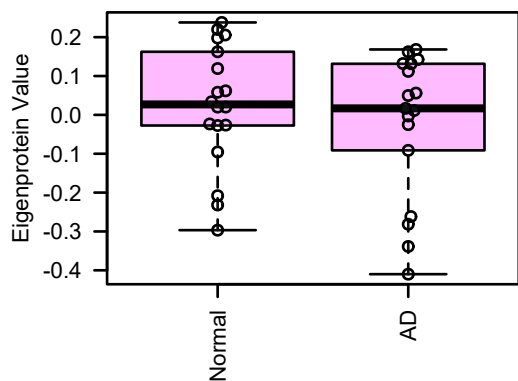

**MEplum1.Plasma 35 Samp. (Synthetic)  
ANOVA p: 0.0015**

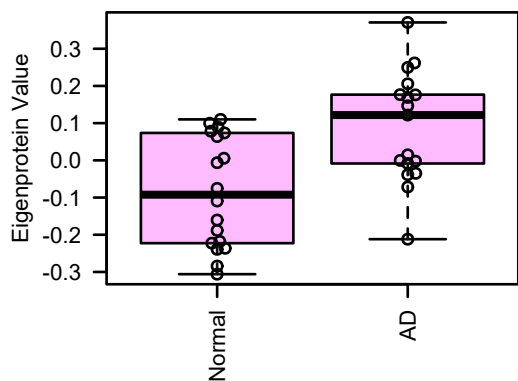

**MEplum1.Plasma (Synthetic)  
ANOVA p: 0.0061**

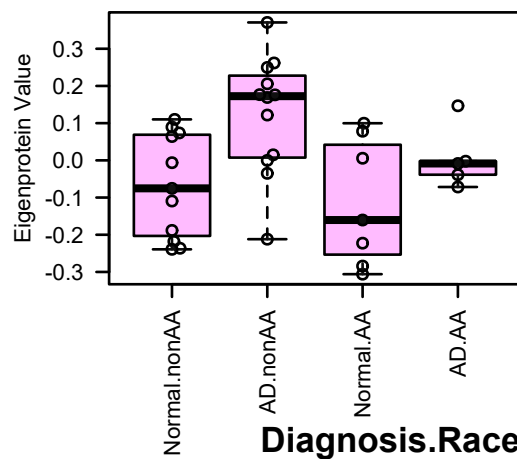

**MEplum1.Plasma (Synthetic)  
ANOVA p: 0.021**

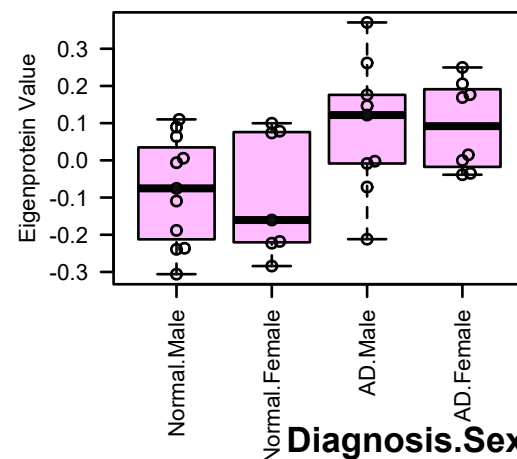

**bicor=-0.53, p=0.00093  
cor=-0.55, p=0.00062**

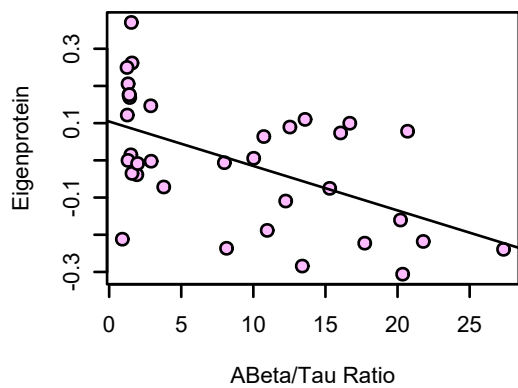

**bicor=-0.28, p=0.13  
cor=-0.26, p=0.16**

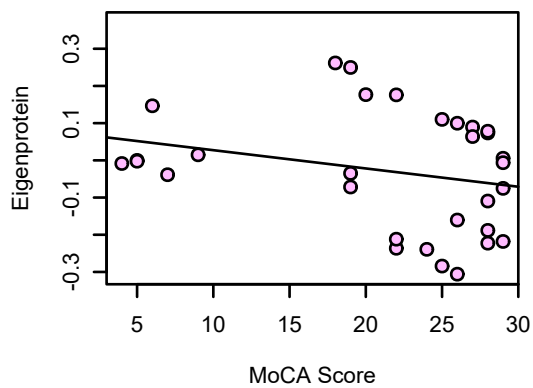

**bicor=-0.089, p=0.72  
cor=-0.077, p=0.76**

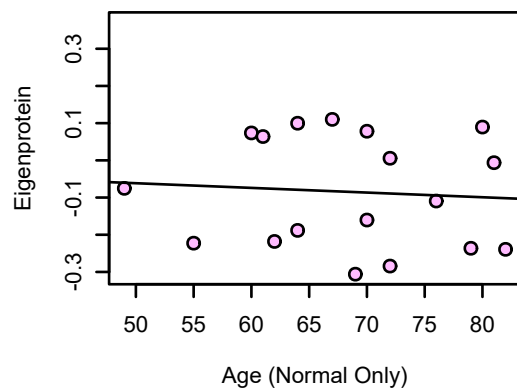

**bicor=0.22, p=0.39  
cor=0.22, p=0.4**

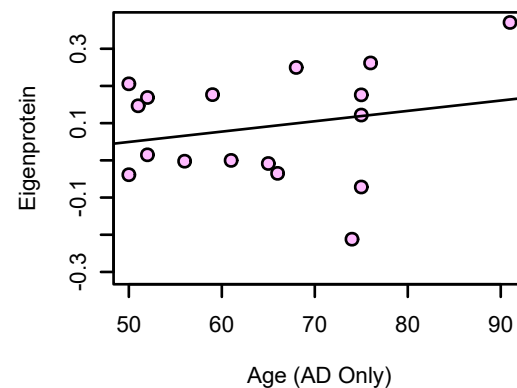



**M7 black.CSF38**  
**SNAP Receptor/SNARE Complex**

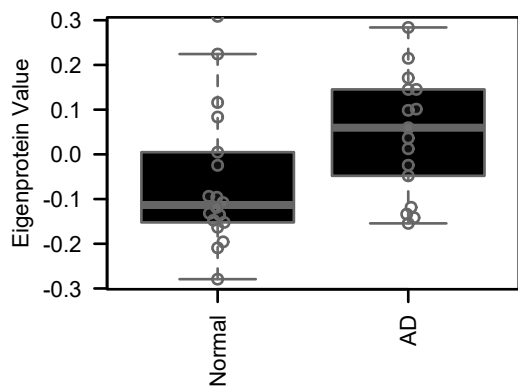

**MEblack.Plasma 35 Samp. (Synthetic)**  
**ANOVA p: 3.8e-06**

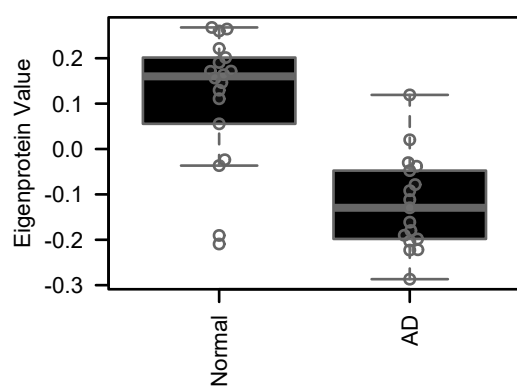

**MEblack.Plasma (Synthetic)**  
**ANOVA p: 1.2e-05**

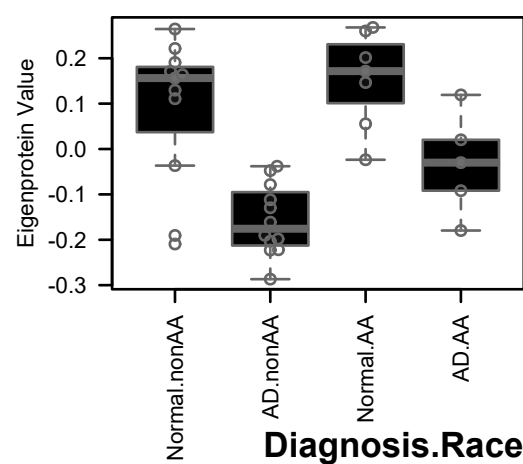

**MEblack.Plasma (Synthetic)**  
**ANOVA p: 8.4e-05**

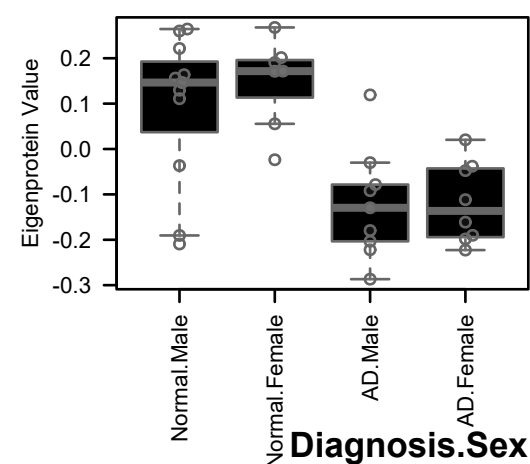

**bicor=0.69, p=3.7e-06**  
**cor=0.68, p=7e-06**

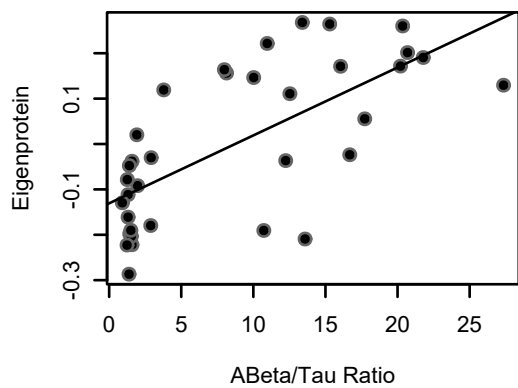

**bicor=0.59, p=0.00045**  
**cor=0.51, p=0.0034**

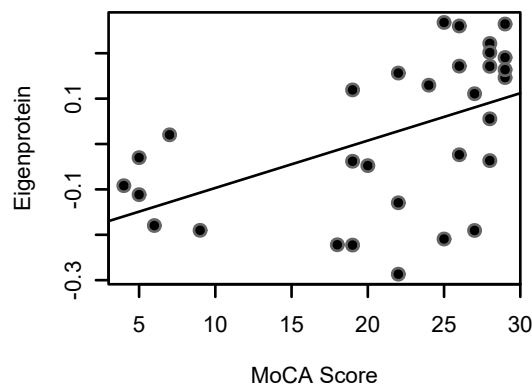

**bicor=-0.076, p=0.76**  
**cor=0.037, p=0.88**

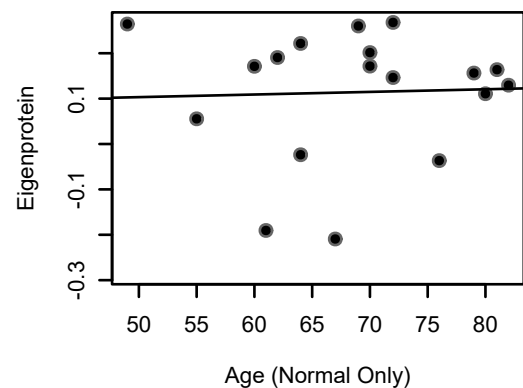

**bicor=-0.15, p=0.57**  
**cor=-0.12, p=0.65**

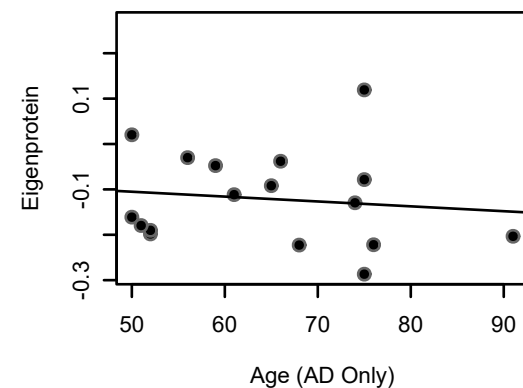

**M2 blue.CSF38**  
**Neuronal/Axon Development**

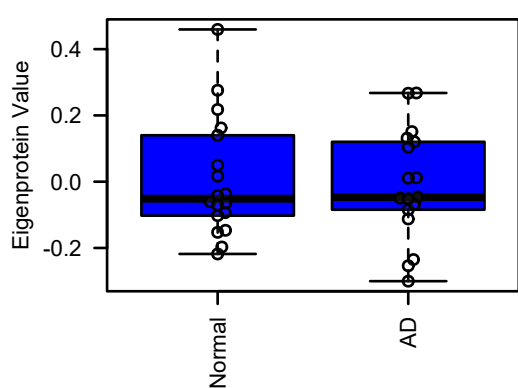

**MEblue.Plasma 35 Samp. (Synthetic)**  
**ANOVA p: 0.00014**

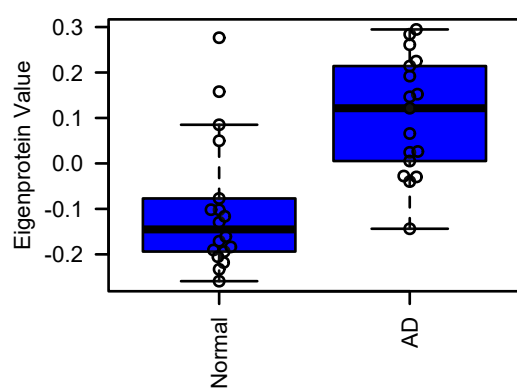

**MEblue.Plasma (Synthetic)**  
**ANOVA p: 0.00053**

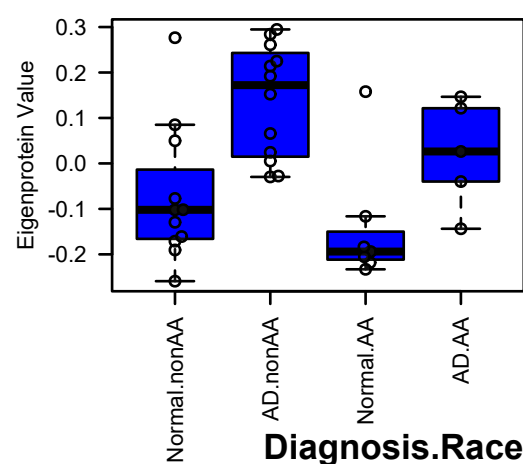

**MEblue.Plasma (Synthetic)**  
**ANOVA p: 0.0012**

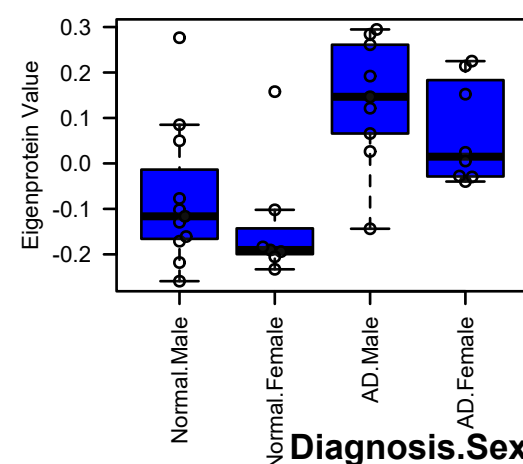

**bicor=-0.59, p=2e-04**  
**cor=-0.59, p=0.00019**

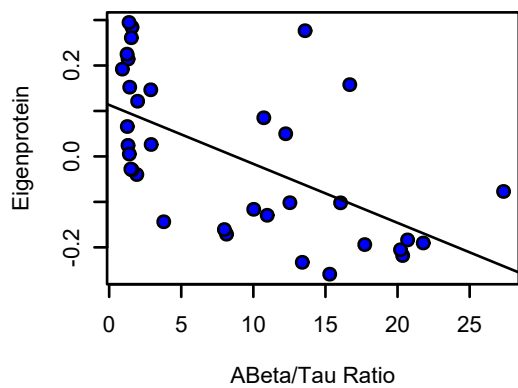

**bicor=-0.51, p=0.0038**  
**cor=-0.38, p=0.035**

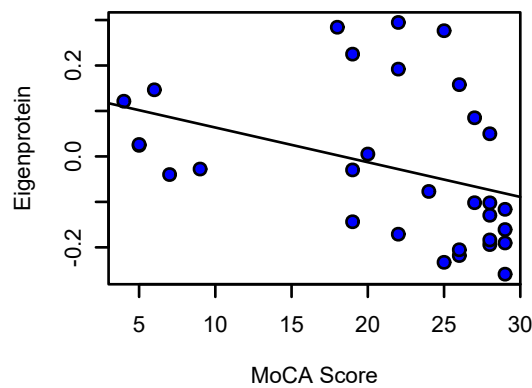

**bicor=0.17, p=0.5**  
**cor=0.045, p=0.86**

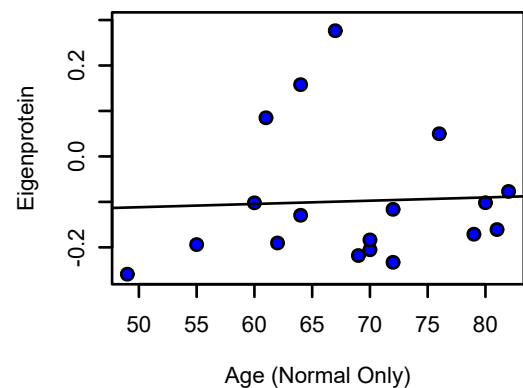

**bicor=0.36, p=0.15**  
**cor=0.35, p=0.17**

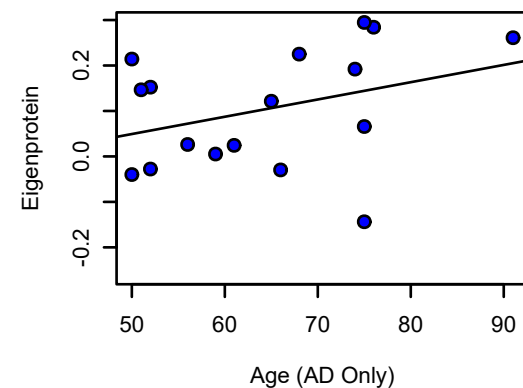

**M14 cyan.CSF38  
Golgi/Glycosylation**

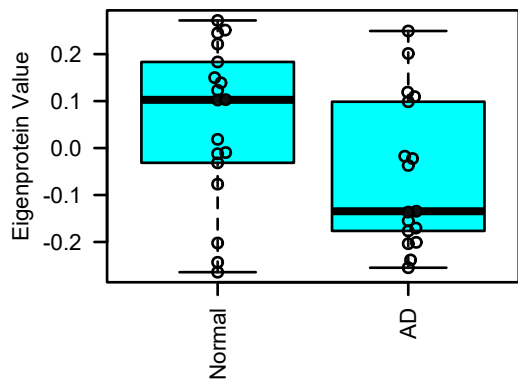

**MEcyan.Plasma 35 Samp. (Synthetic)  
ANOVA p: 0.0038**

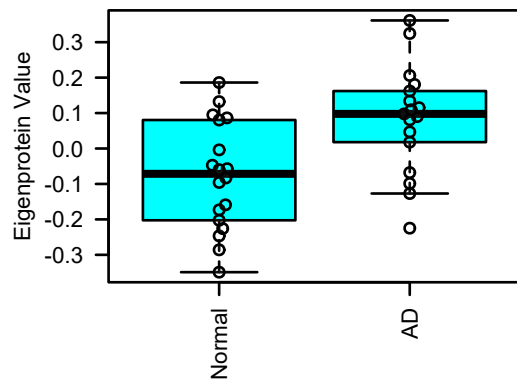

**MEcyan.Plasma (Synthetic)  
ANOVA p: 0.0018**

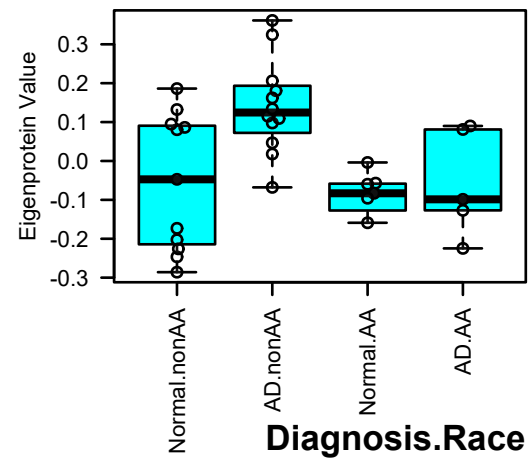

**MEcyan.Plasma (Synthetic)  
ANOVA p: 0.028**

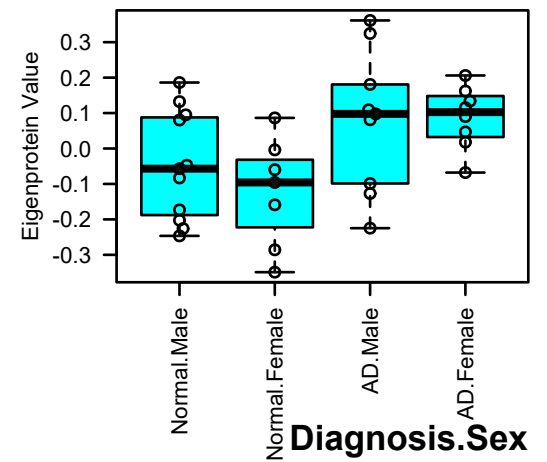

**bicor=-0.49, p=0.0026  
cor=-0.49, p=0.0028**

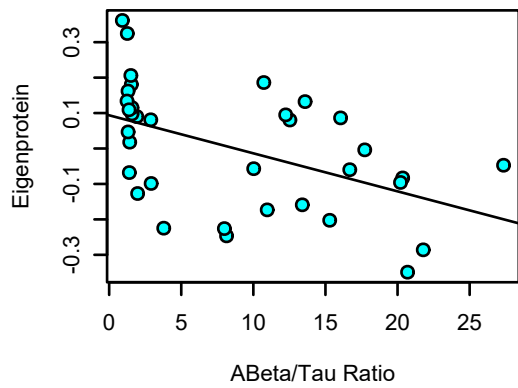

**bicor=-0.42, p=0.018  
cor=-0.29, p=0.11**

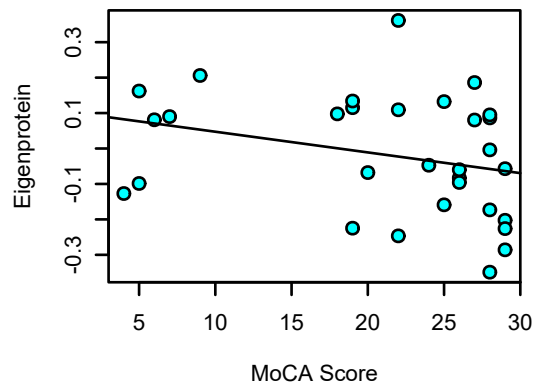

**bicor=-0.063, p=0.8  
cor=-0.054, p=0.83**

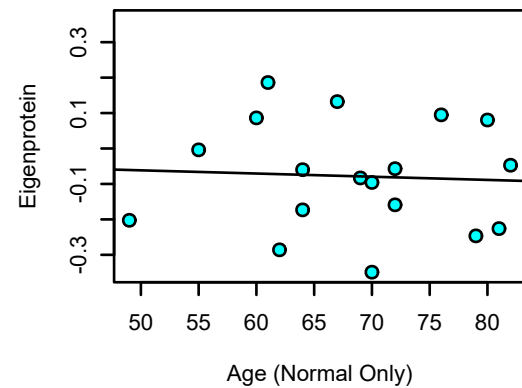

**bicor=0.3, p=0.25  
cor=0.24, p=0.35**

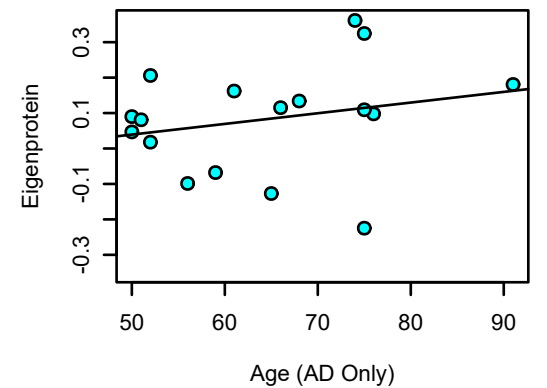

**M27 white.CSF38  
Ambiguous**

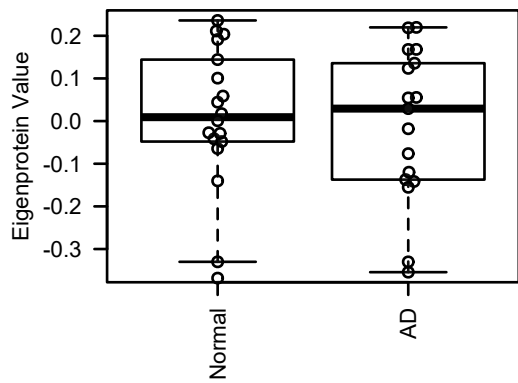

**MEwhite.Plasma 35 Samp. (Synthetic)  
ANOVA p: 0.0024**

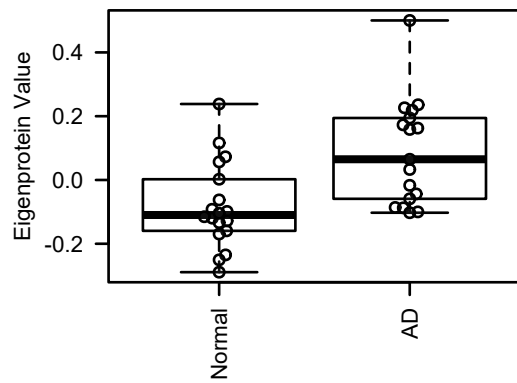

**MEwhite.Plasma (Synthetic)  
ANOVA p: 0.00075**

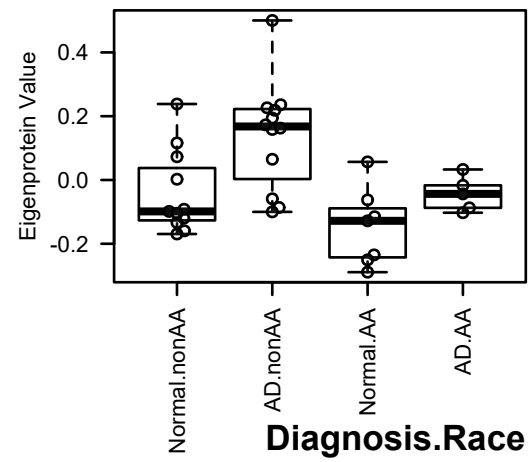

**MEwhite.Plasma (Synthetic)  
ANOVA p: 0.018**

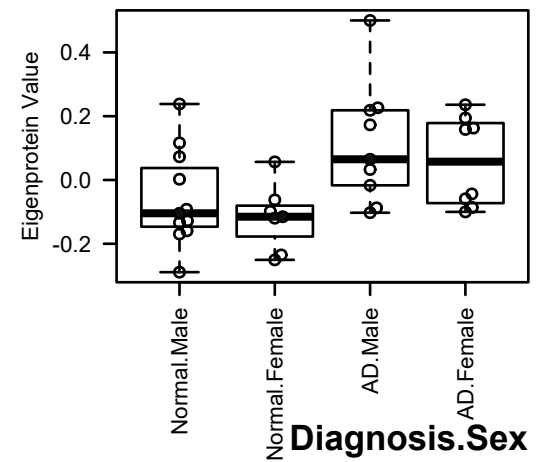

**bicor=-0.51, p=0.0018  
cor=-0.53, p=0.0011**

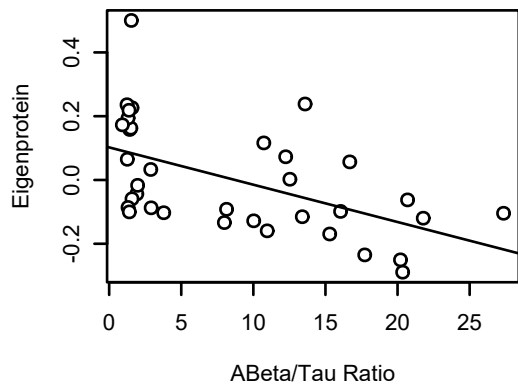

**bicor=-0.47, p=0.0076  
cor=-0.22, p=0.23**

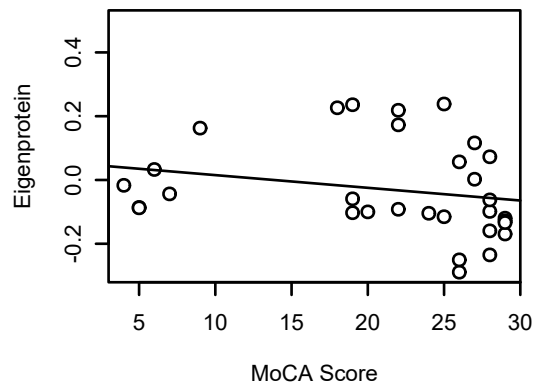

**bicor=0.19, p=0.45  
cor=0.11, p=0.66**

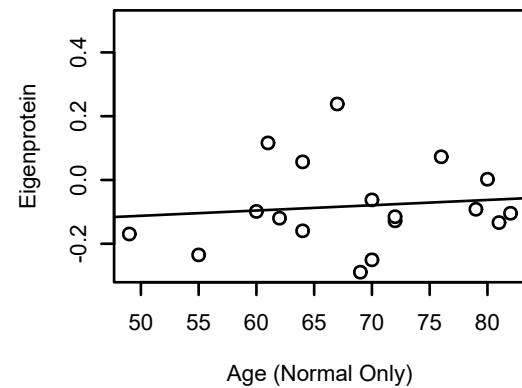

**bicor=0.4, p=0.11  
cor=0.47, p=0.057**

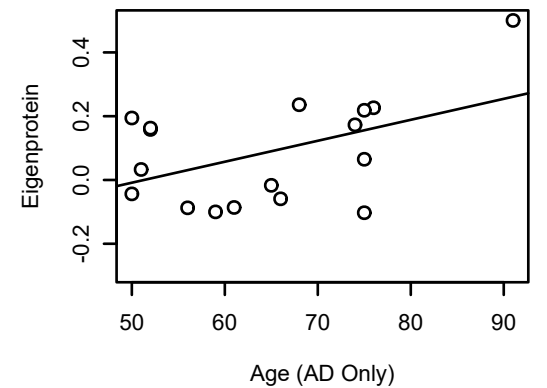

**M32 violet.CSF38**  
Synaptic Membrane/Matrisome

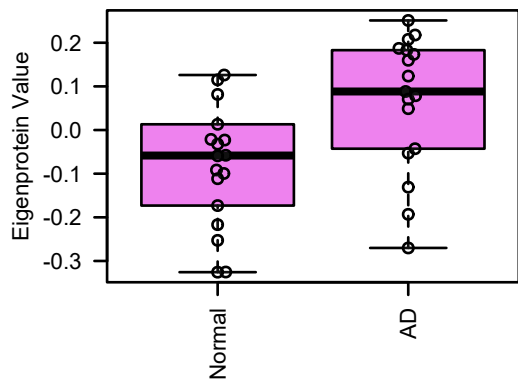

**MEviolet.Plasma 35 Samp. (Synthetic)**  
ANOVA p: 0.0013

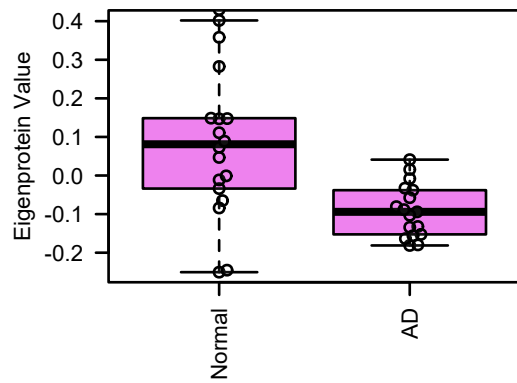

**MEviolet.Plasma (Synthetic)**  
ANOVA p: 0.012

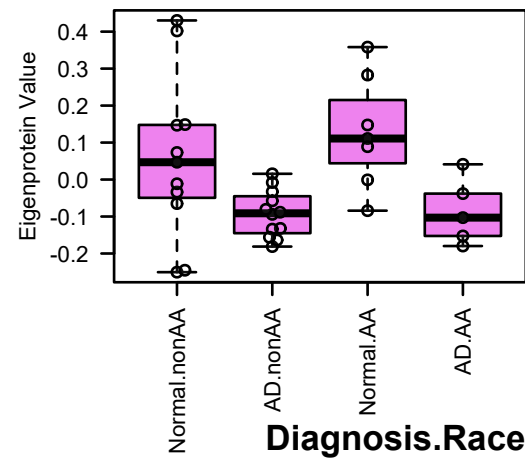

**MEviolet.Plasma (Synthetic)**  
ANOVA p: 0.014

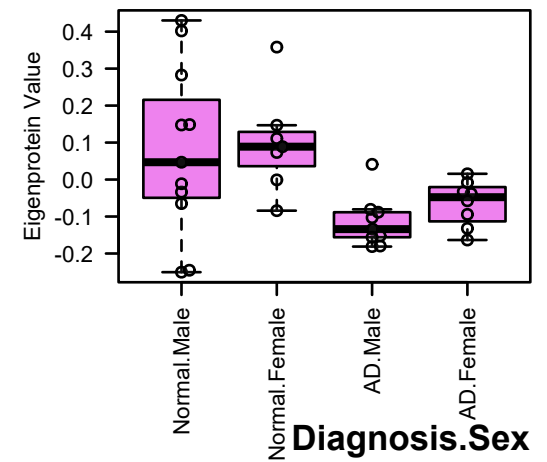

**bicor=0.49, p=0.0027**  
**cor=0.42, p=0.012**

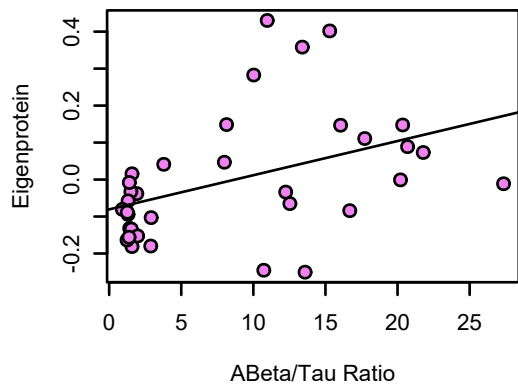

**bicor=0.47, p=0.0076**  
**cor=0.46, p=0.0092**

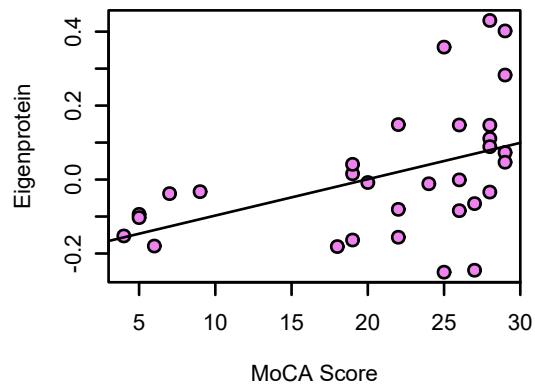

**bicor=-0.21, p=0.4**  
**cor=-0.23, p=0.36**

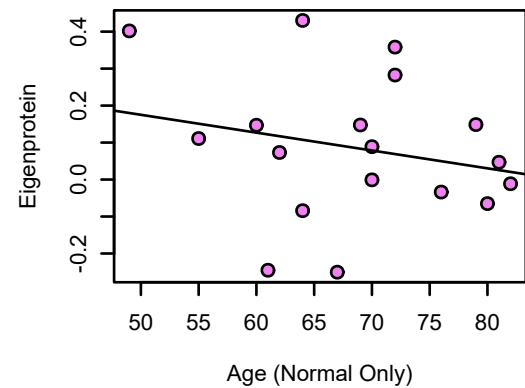

**bicor=-0.17, p=0.5**  
**cor=-0.16, p=0.54**

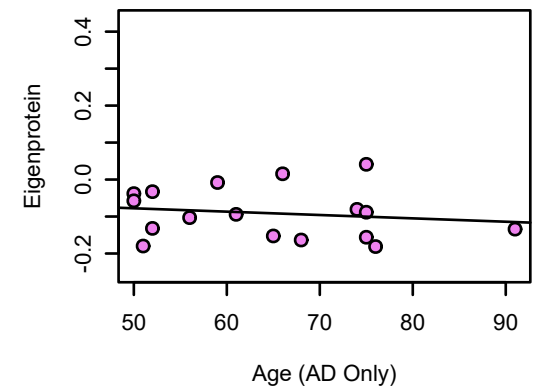

**M13 salmon.CSF38**  
Semaphorin-Plexin/Axon Guidance

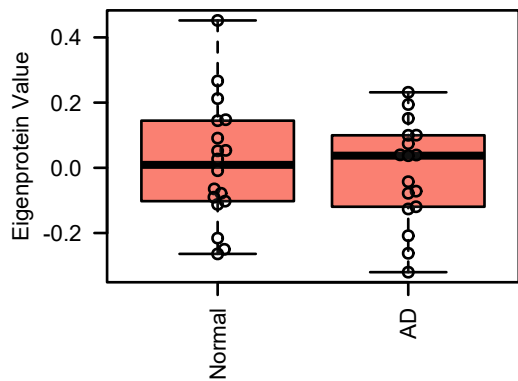

**MEsalmon.Plasma 35 Samp. (Synthetic)**  
ANOVA p: 0.00024

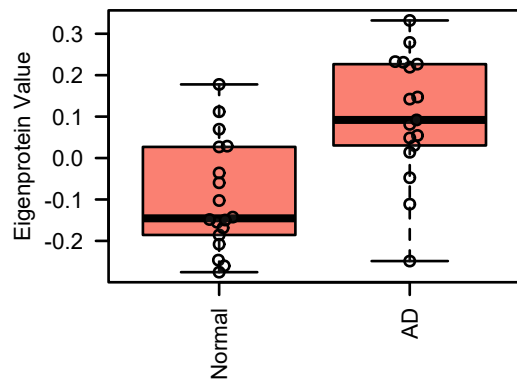

**MEsalmon.Plasma (Synthetic)**  
ANOVA p: 0.00038

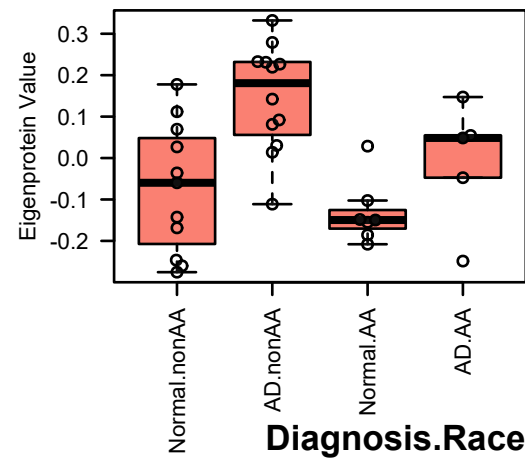

**MEsalmon.Plasma (Synthetic)**  
ANOVA p: 0.0041

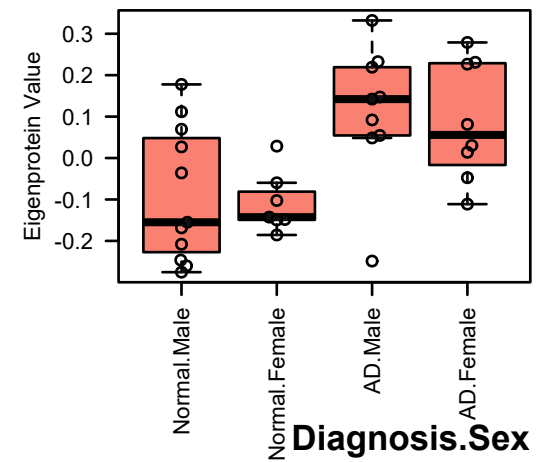

**bicor=-0.6, p=0.00014**  
**cor=-0.59, p=0.00019**

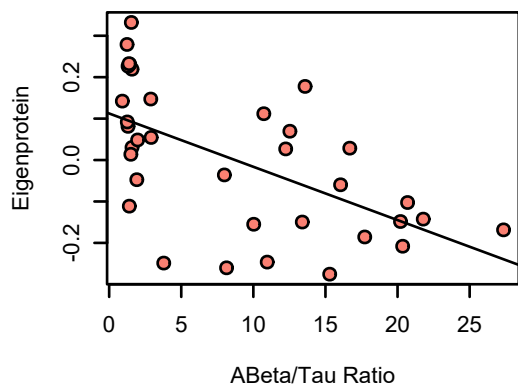

**bicor=-0.42, p=0.02**  
**cor=-0.38, p=0.035**

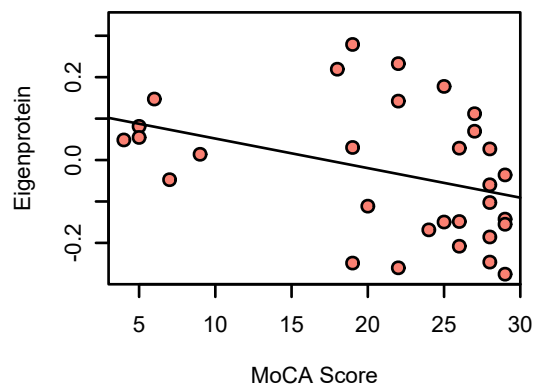

**bicor=0.11, p=0.67**  
**cor=0.15, p=0.55**

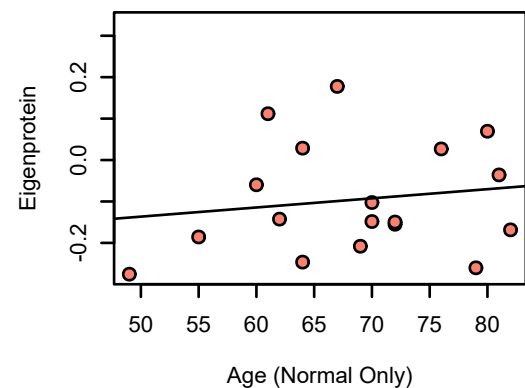

**bicor=0.23, p=0.37**  
**cor=0.24, p=0.35**

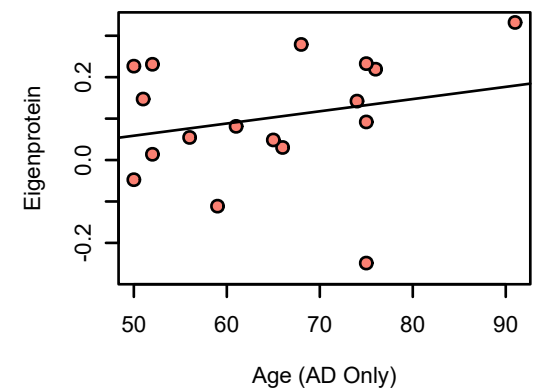

**M12 tan.CSF38**  
**Neurexin/Neuronal Adhesion**

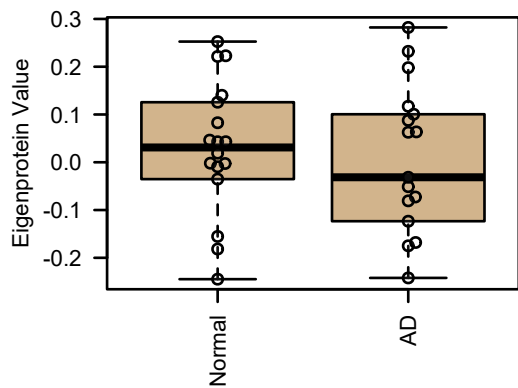

**MEtan.Plasma 35 Samp. (Synthetic)**  
**ANOVA p: 0.00076**

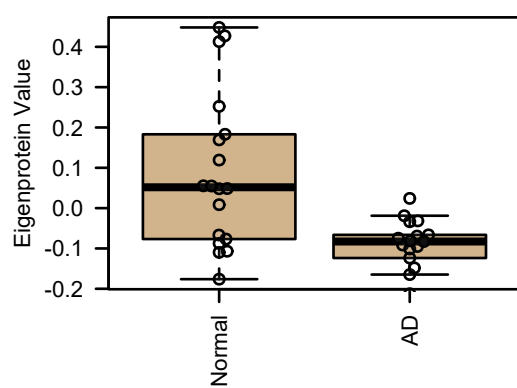

**MEtan.Plasma (Synthetic)**  
**ANOVA p: 0.0075**

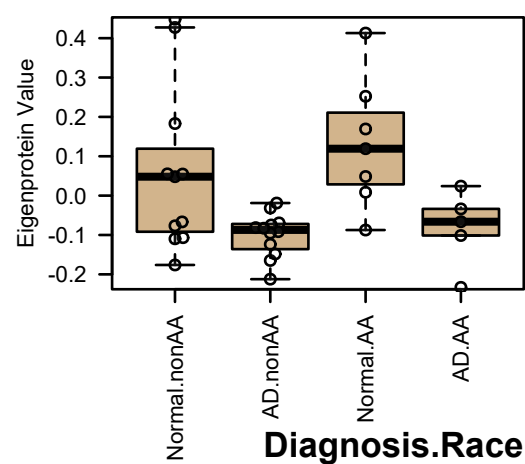

**MEtan.Plasma (Synthetic)**  
**ANOVA p: 0.01**

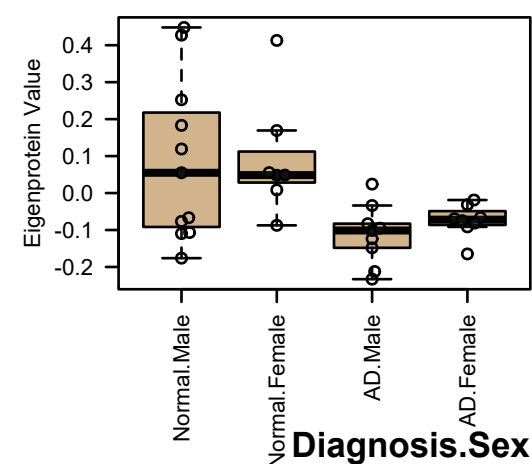

**bicor=0.5, p=0.0023**  
**cor=0.4, p=0.017**

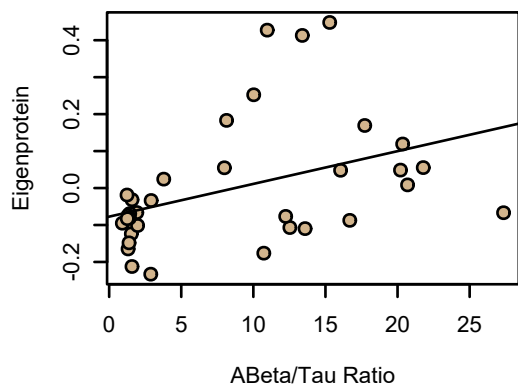

**bicor=0.45, p=0.01**  
**cor=0.45, p=0.011**

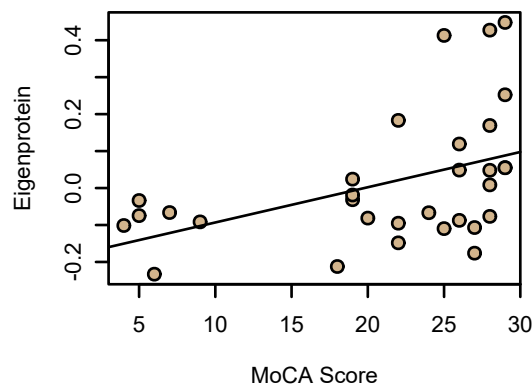

**bicor=-0.28, p=0.26**  
**cor=-0.31, p=0.21**

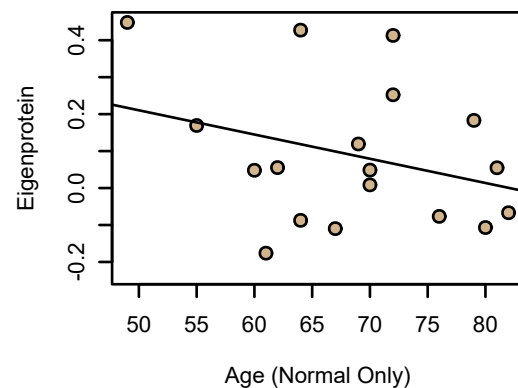

**bicor=0.016, p=0.95**  
**cor=0.039, p=0.88**

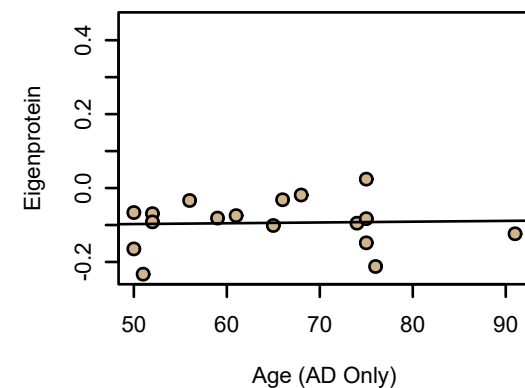

**M9 magenta.CSF38**  
**Ambiguous**

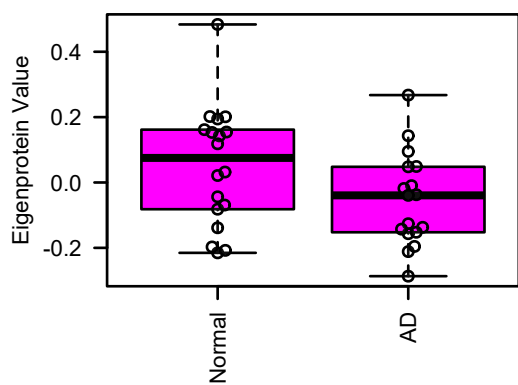

**MEmagenta.Plasma 35 Samp. (Synthetic)**  
**ANOVA p: 1.6e-05**

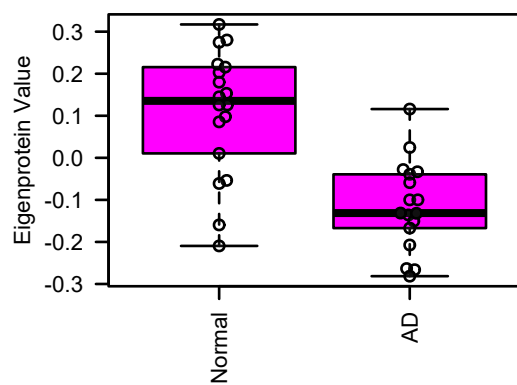

**MEmagenta.Plasma (Synthetic)**  
**ANOVA p: 4.8e-05**

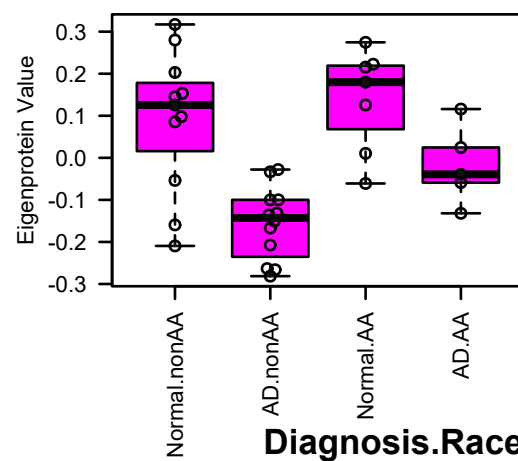

**MEmagenta.Plasma (Synthetic)**  
**ANOVA p: 0.00041**

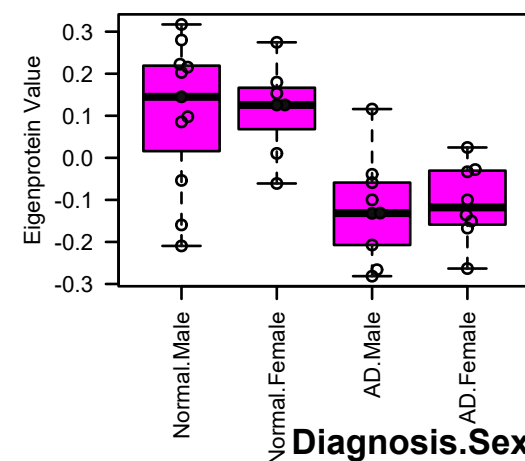

**bicor=0.62, p=6.3e-05**  
**cor=0.6, p=0.00014**

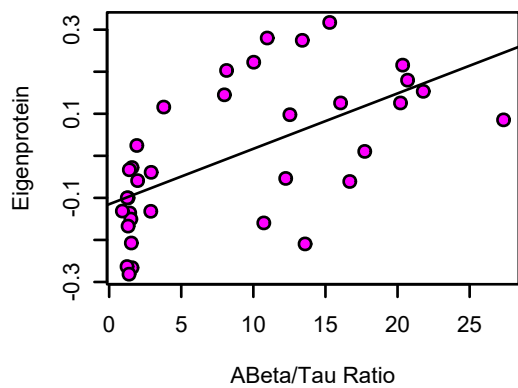

**bicor=0.55, p=0.0013**  
**cor=0.45, p=0.011**

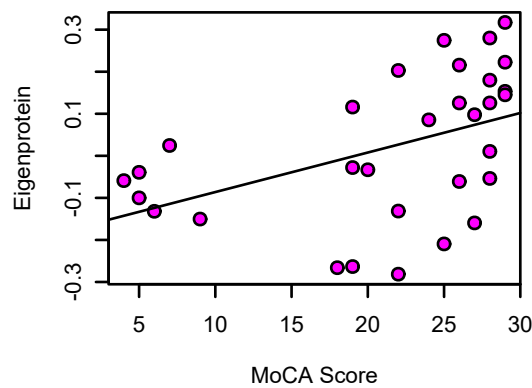

**bicor=0.032, p=0.9**  
**cor=0.011, p=0.97**

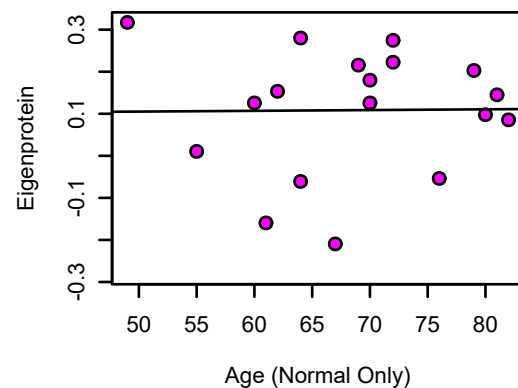

**bicor=-0.3, p=0.24**  
**cor=-0.26, p=0.31**

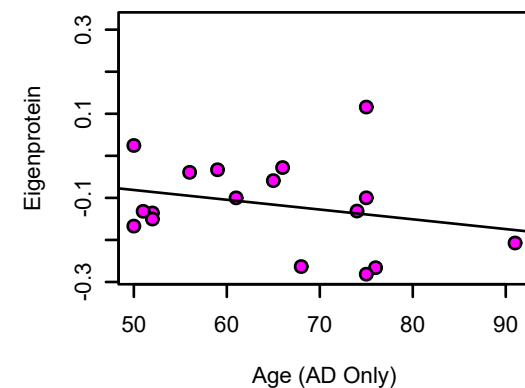

**M30 steelblue.CSF38**  
**Ribonucleoprotein Complex**

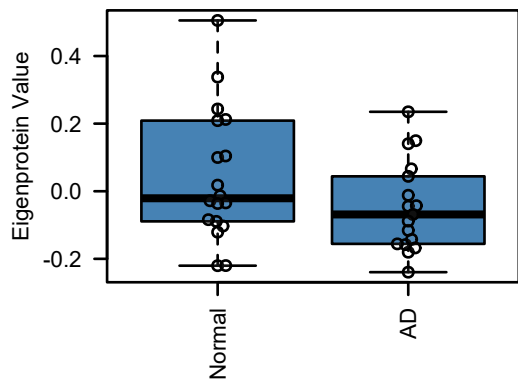

**MEsteelblue.Plasma 35 Samp. (Synthetic)**  
**ANOVA p: 0.00014**

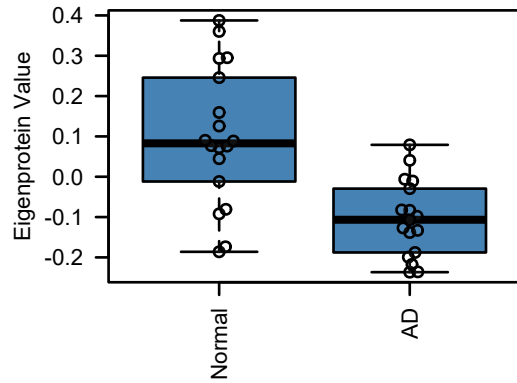

**MEsteelblue.Plasma (Synthetic)**  
**ANOVA p: 0.0015**

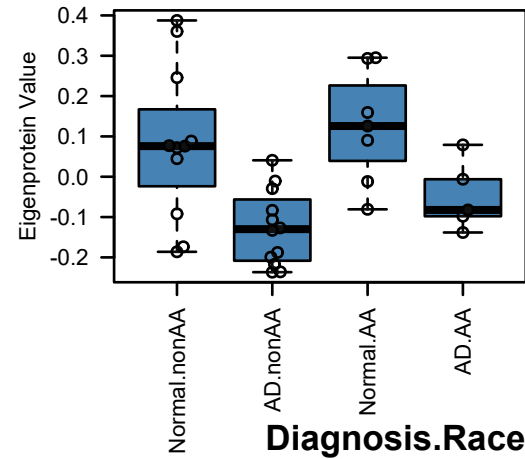

**MEsteelblue.Plasma (Synthetic)**  
**ANOVA p: 0.0022**

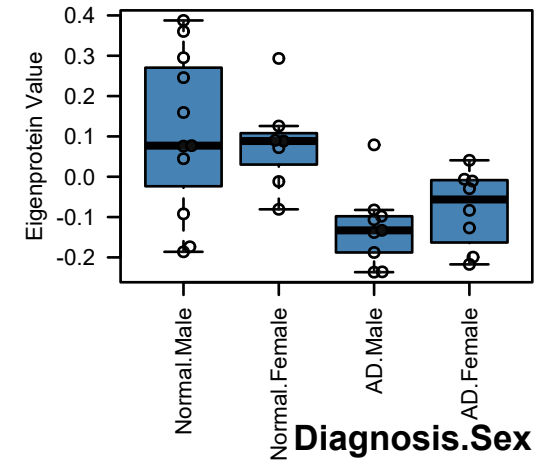

**bicor=0.54, p=0.00083**  
**cor=0.49, p=0.0028**

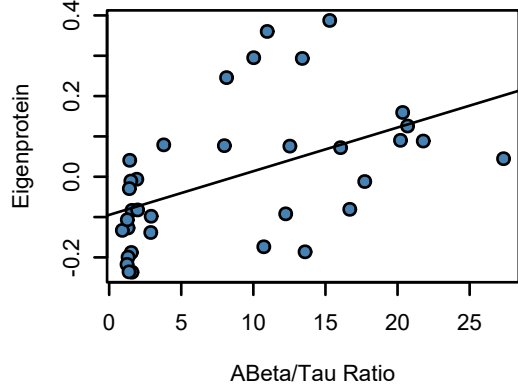

**bicor=0.48, p=0.0062**  
**cor=0.44, p=0.013**

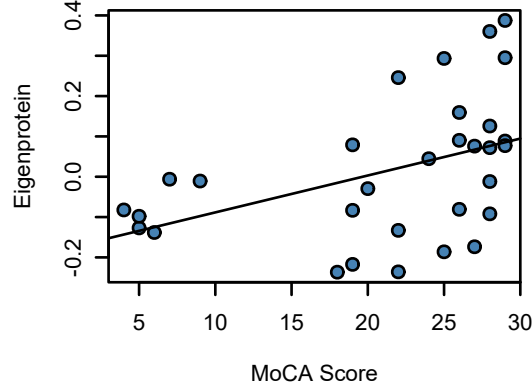

**bicor=-0.013, p=0.96**  
**cor=-0.055, p=0.83**

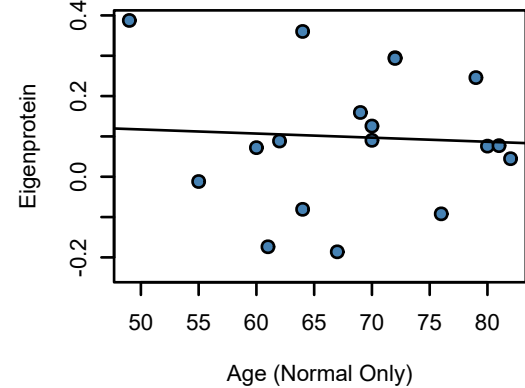

**bicor=-0.39, p=0.13**  
**cor=-0.37, p=0.14**

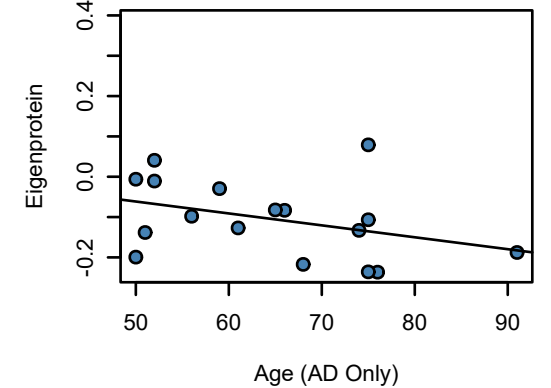

**M25 orange.CSF38**  
**Ambiguous**

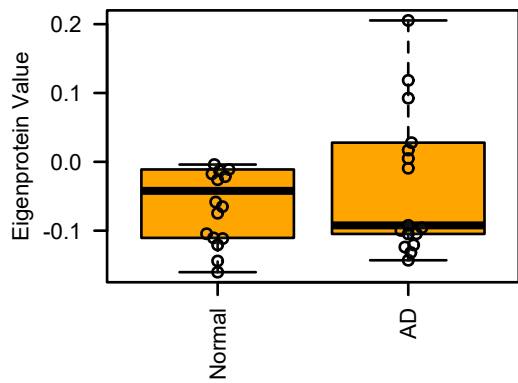

**MEorange.Plasma 35 Samp. (Synthetic)**  
**ANOVA p: 0.00027**

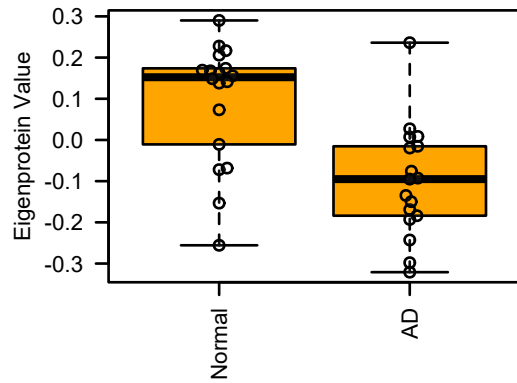

**MEorange.Plasma (Synthetic)**  
**ANOVA p: 0.00024**

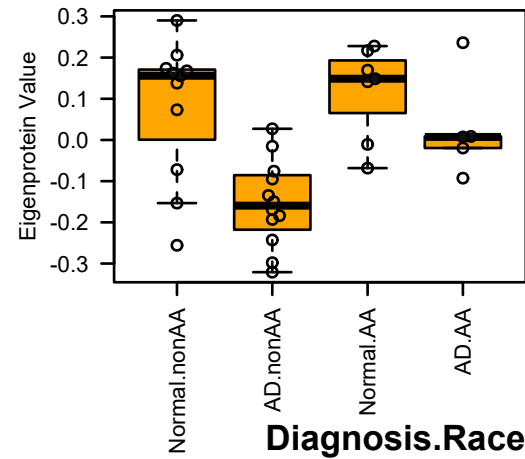

**MEorange.Plasma (Synthetic)**  
**ANOVA p: 0.0048**

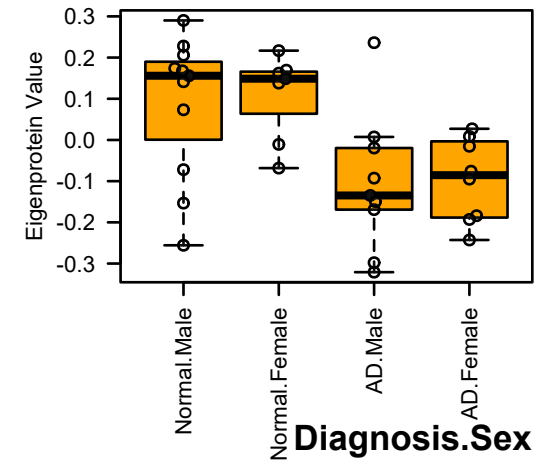

**bicor=0.57, p=0.00031**  
**cor=0.56, p=0.00047**

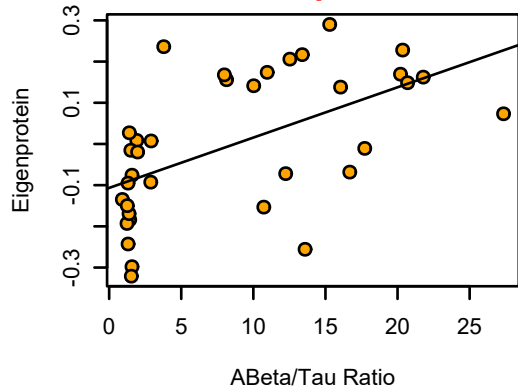

**bicor=0.43, p=0.015**  
**cor=0.37, p=0.04**

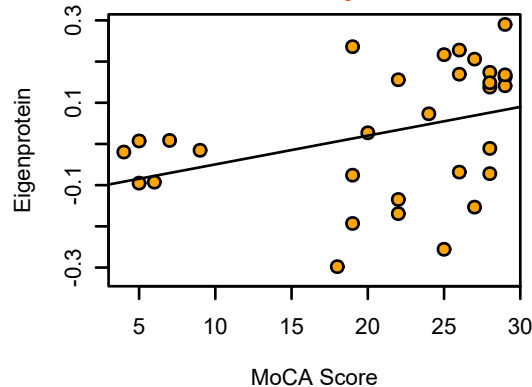

**bicor=0.068, p=0.79**  
**cor=0.075, p=0.77**

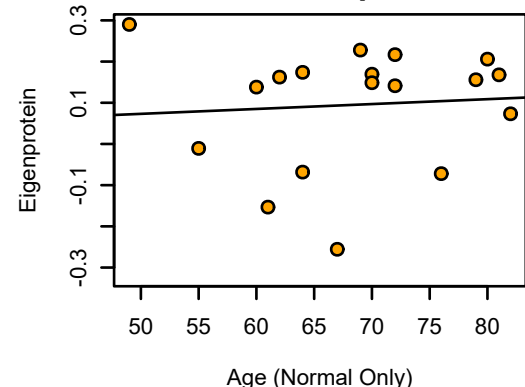

**bicor=-0.33, p=0.2**  
**cor=-0.29, p=0.26**

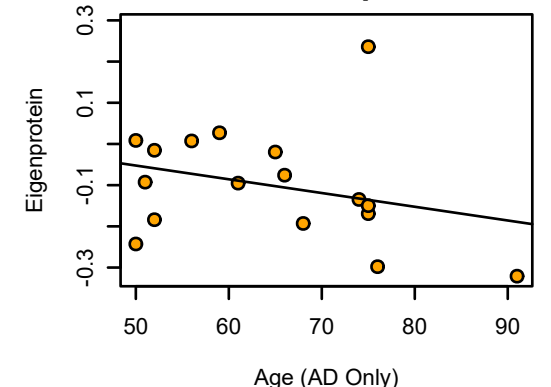

**M5 green.CSF38**  
Compound Metabolism/Heat Shock Protein Bi

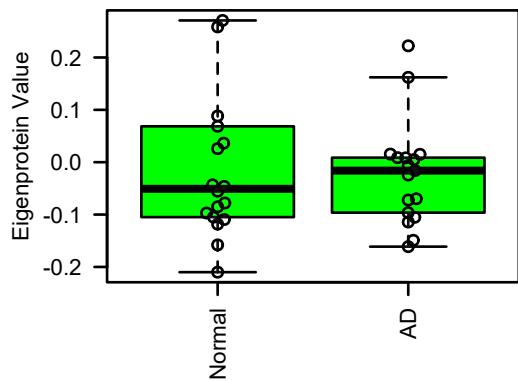

**MEgreen.Plasma 35 Samp. (Synthetic)**  
ANOVA p: 5.3e-05

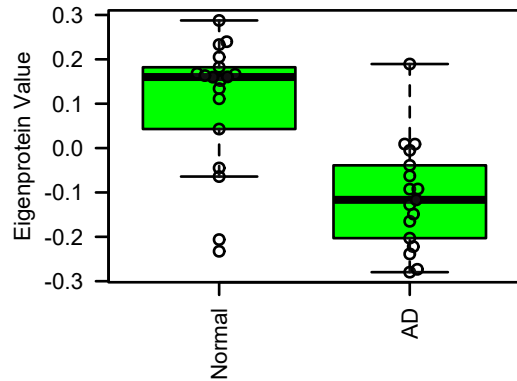

**MEgreen.Plasma (Synthetic)**  
ANOVA p: 8.7e-05

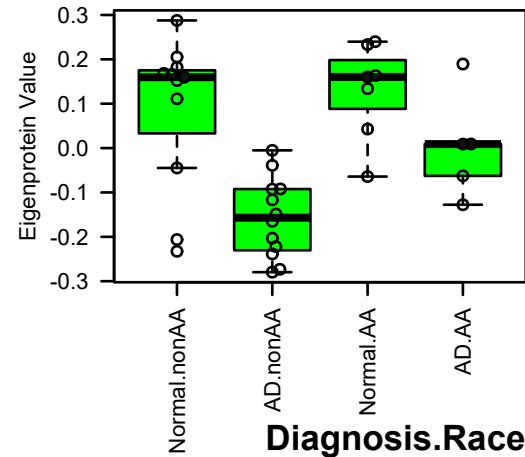

**MEgreen.Plasma (Synthetic)**  
ANOVA p: 0.0011

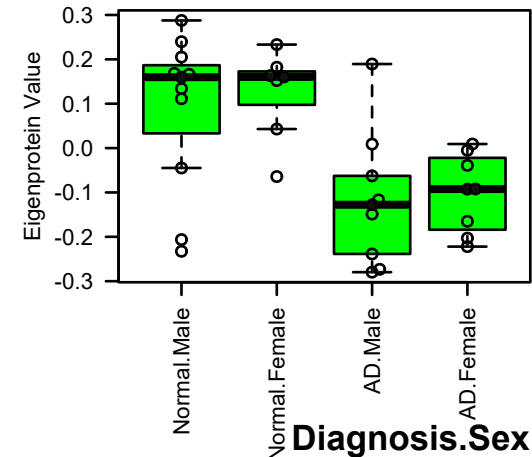

**bicor=0.63, p=4.9e-05**  
**cor=0.62, p=7.1e-05**

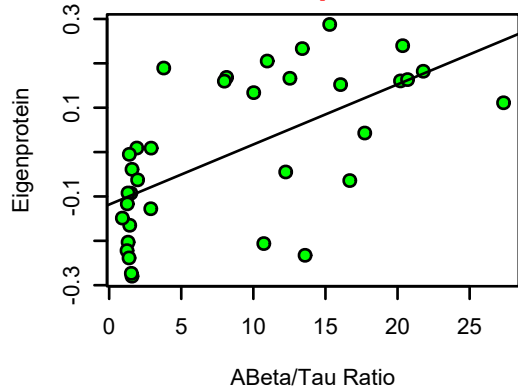

**bicor=0.49, p=0.0047**  
**cor=0.42, p=0.019**

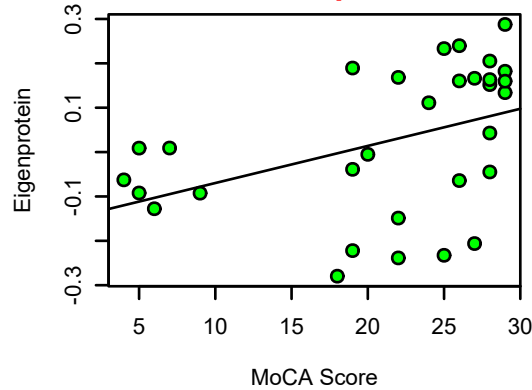

**bicor=-0.12, p=0.64**  
**cor=0.057, p=0.82**

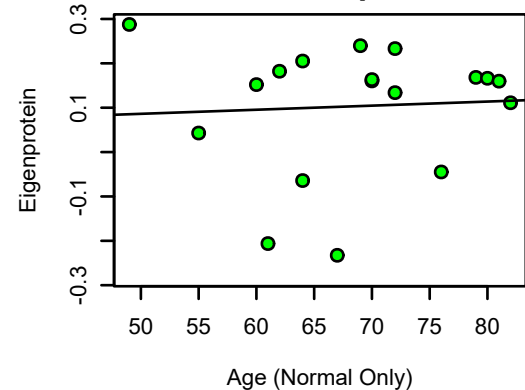

**bicor=-0.33, p=0.2**  
**cor=-0.28, p=0.28**

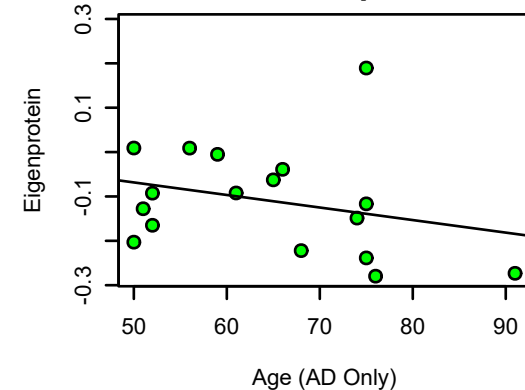

**M37 skyblue3.CSF38**  
RNA Binding/Metabolism

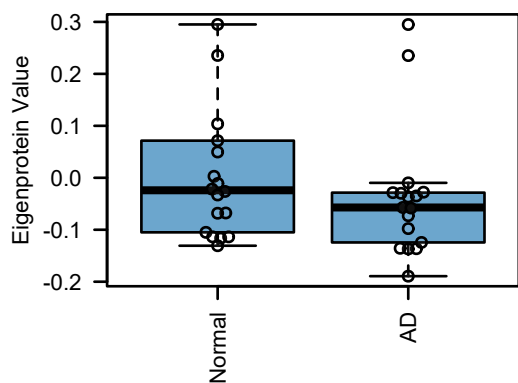

**MEskyblue3.Plasma 35 Samp. (Synthetic)**  
ANOVA p: 6.1e-05

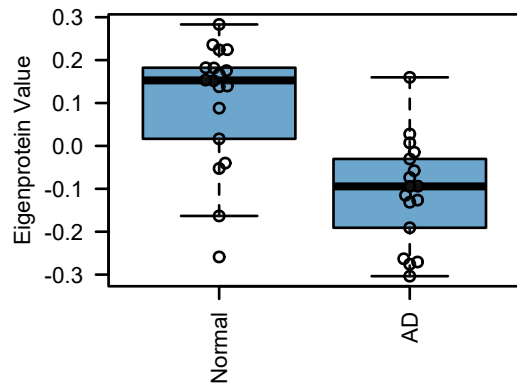

**MEskyblue3.Plasma (Synthetic)**  
ANOVA p: 7.8e-05

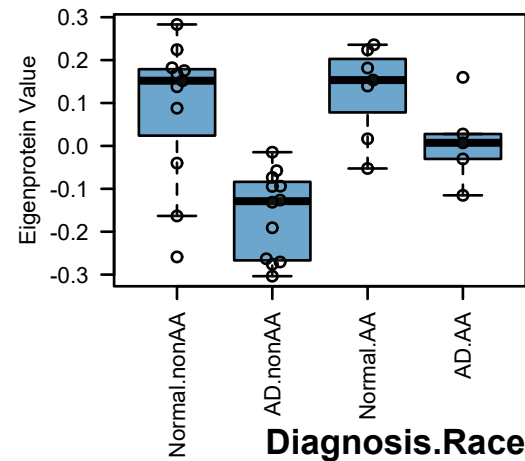

**MEskyblue3.Plasma (Synthetic)**  
ANOVA p: 0.0013

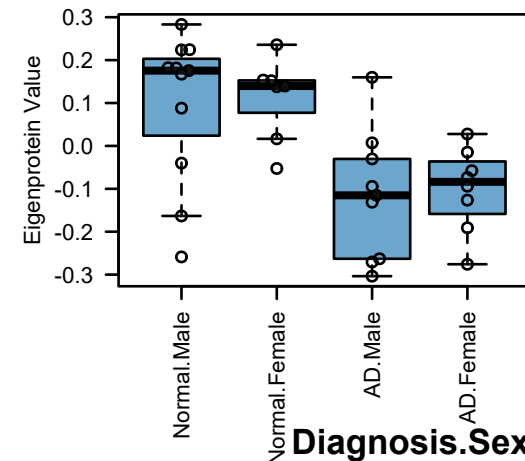

**bicor=0.6, p=0.00014**  
**cor=0.58, p=0.00026**

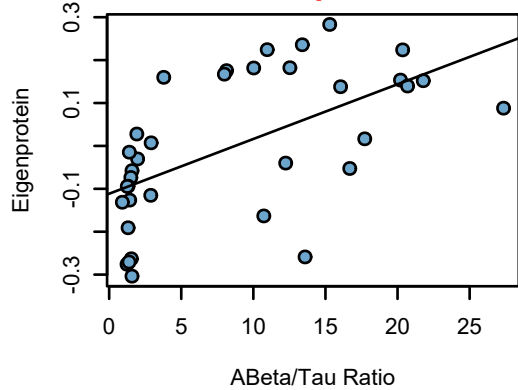

**bicor=0.52, p=0.0026**  
**cor=0.39, p=0.03**

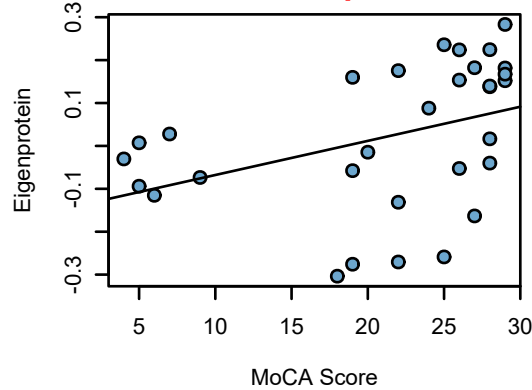

**bicor=0.087, p=0.73**  
**cor=0.081, p=0.75**

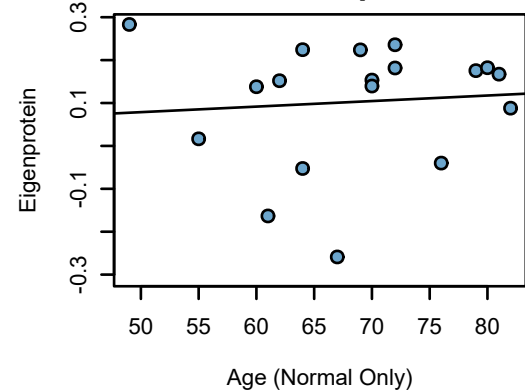

**bicor=-0.35, p=0.17**  
**cor=-0.34, p=0.18**

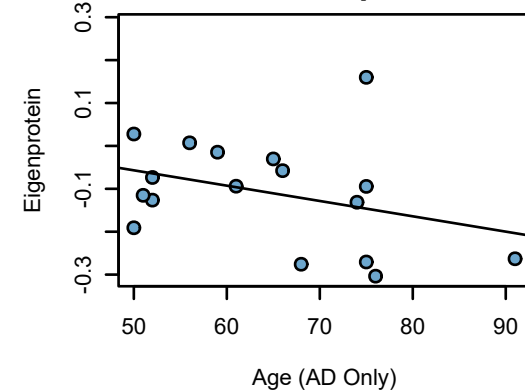

**M34 darkmagenta.CSF38**  
**Cofactor Biosynthesis**



**MEdarkmagenta.Plasma 35 Samp. (Synthetic)**  
**ANOVA p: 0.83**

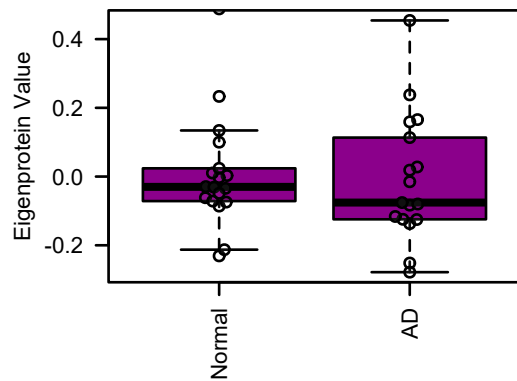

**MEdarkmagenta.Plasma (Synthetic)**  
**ANOVA p: 0.89**

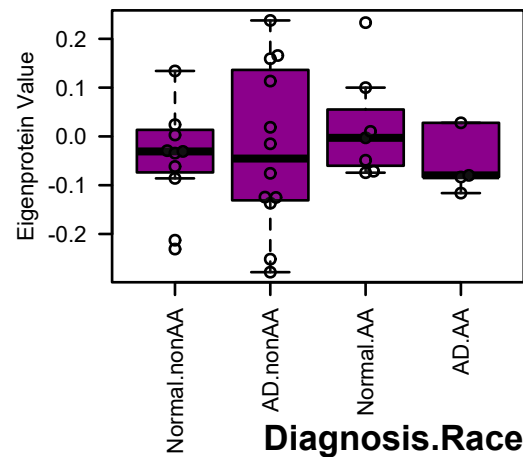

**MEdarkmagenta.Plasma (Synthetic)**  
**ANOVA p: 0.87**

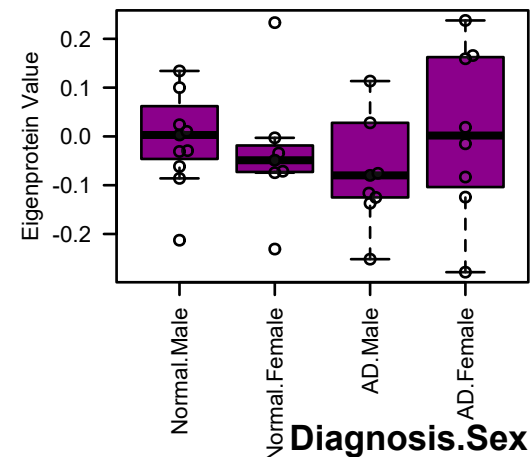

**bicor=0.041, p=0.82**  
**cor=0.058, p=0.74**

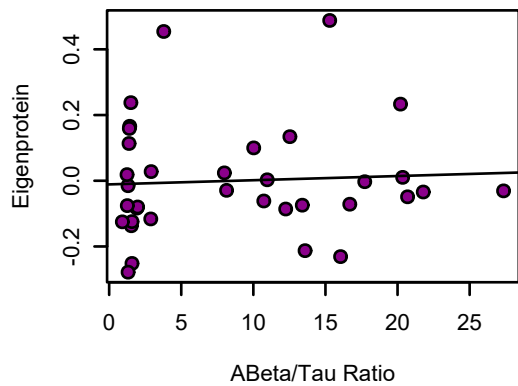

**bicor=0.046, p=0.81**  
**cor=0.073, p=0.7**

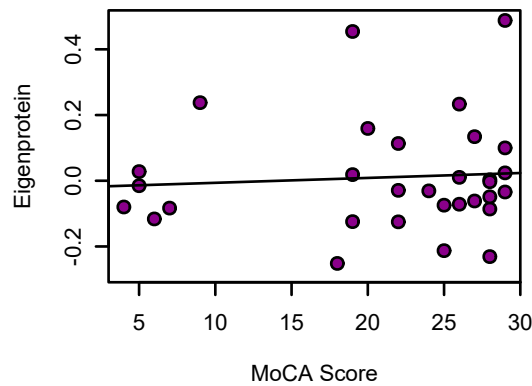

**bicor=0.3, p=0.22**  
**cor=-0.21, p=0.4**

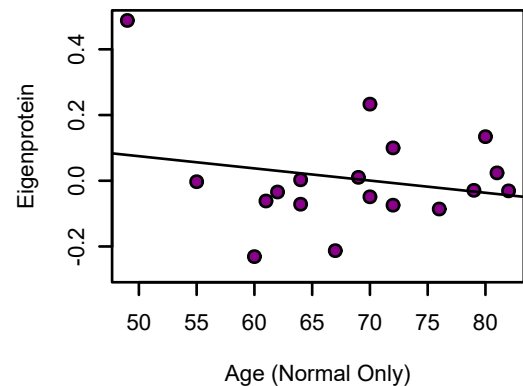

**bicor=-0.17, p=0.5**  
**cor=-0.056, p=0.83**

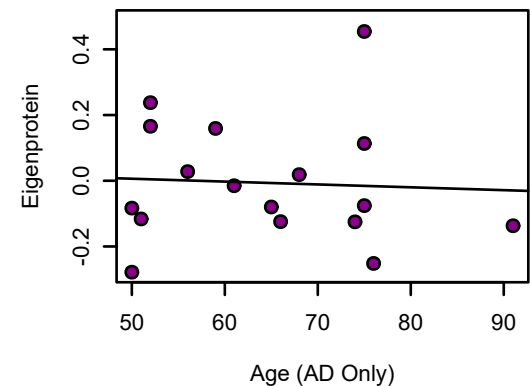

**M28 skyblue.CSF38**  
**Proteasome**

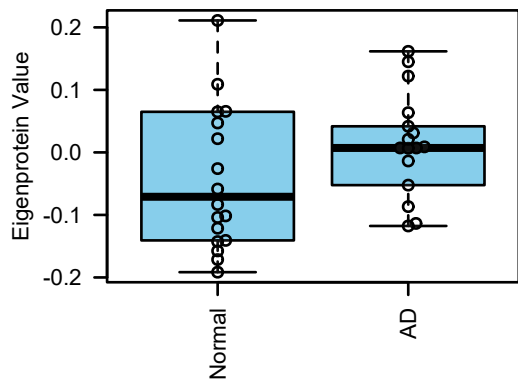

**MEskyblue.Plasma 35 Samp. (Synthetic)**  
**ANOVA p: 0.033**

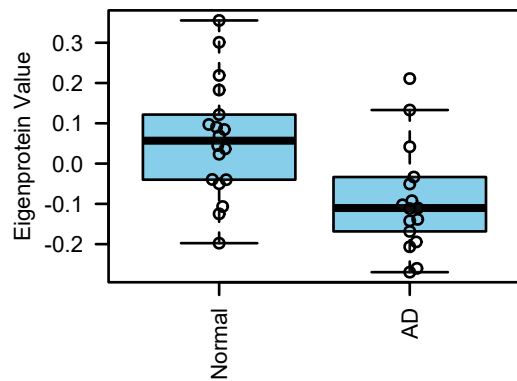

**MEskyblue.Plasma (Synthetic)**  
**ANOVA p: 0.2**

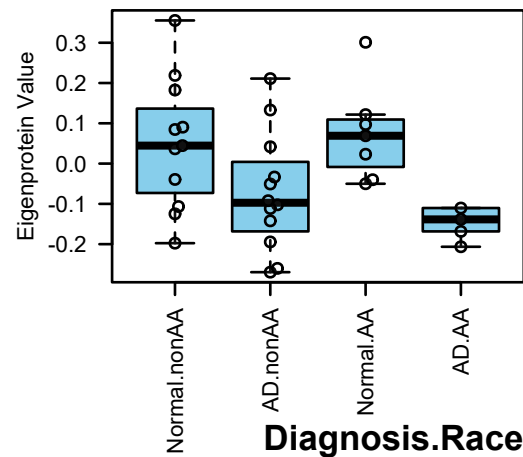

**MEskyblue.Plasma (Synthetic)**  
**ANOVA p: 0.13**

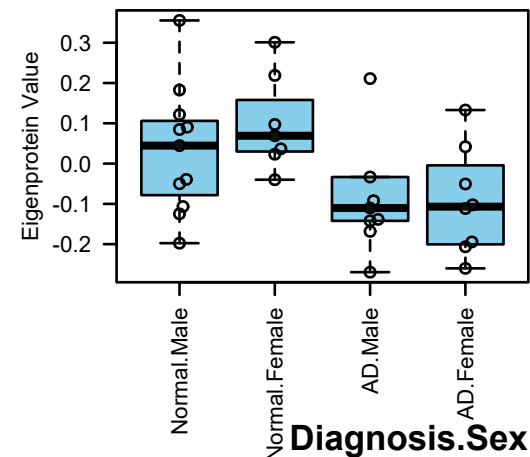

**bicor=0.43, p=0.011**  
**cor=0.38, p=0.024**

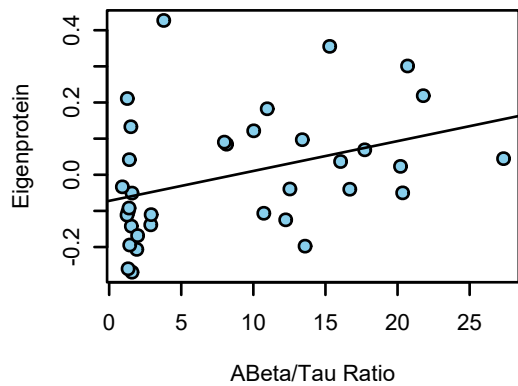

**bicor=0.35, p=0.054**  
**cor=0.43, p=0.016**

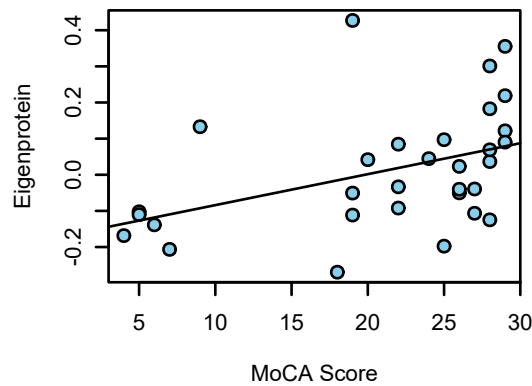

**bicor=-0.24, p=0.33**  
**cor=-0.3, p=0.23**

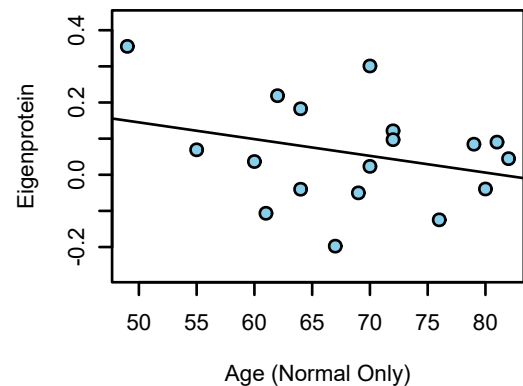

**bicor=0.16, p=0.55**  
**cor=0.25, p=0.33**

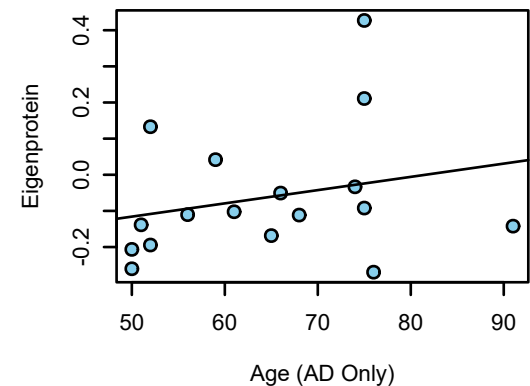

**M16 lightcyan.CSF38**  
Sugar Metabolism

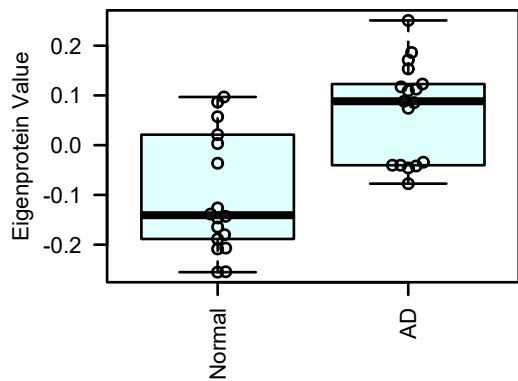

**MElightcyan.Plasma 35 Samp. (Synthetic)**  
ANOVA p: 1.9e-05

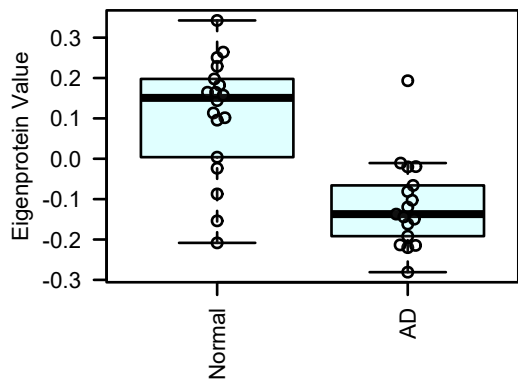

**MElightcyan.Plasma (Synthetic)**  
ANOVA p: 5.1e-05

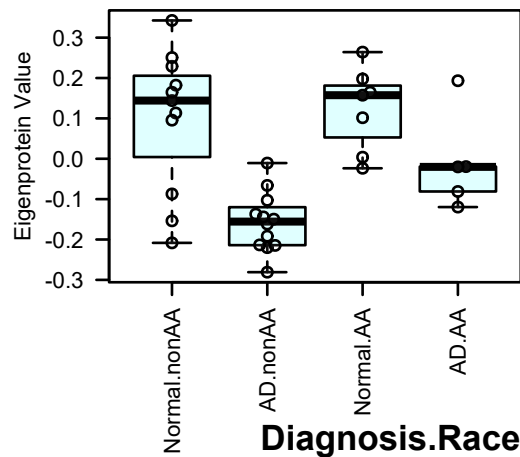

**MElightcyan.Plasma (Synthetic)**  
ANOVA p: 0.00035

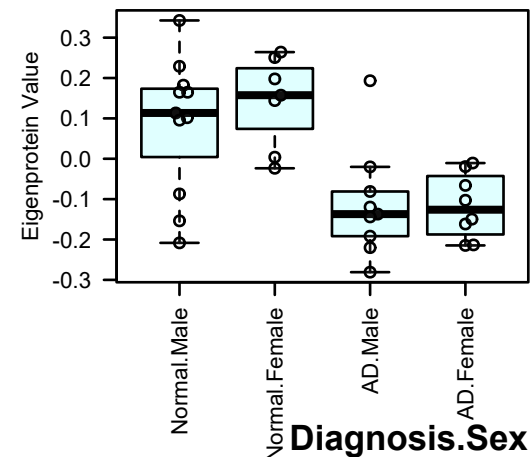

**bicor=0.64, p=3e-05**  
**cor=0.62, p=7.1e-05**

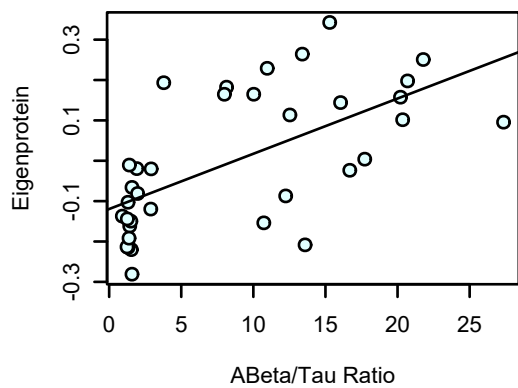

**bicor=0.51, p=0.0035**  
**cor=0.48, p=0.0063**

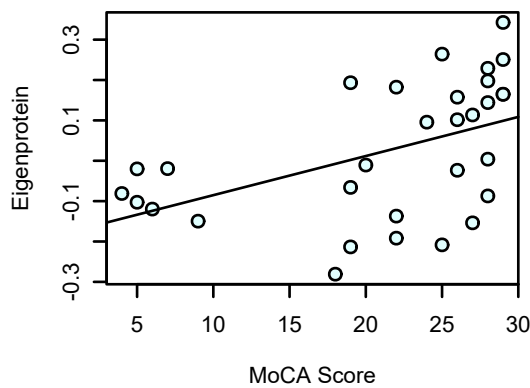

**bicor=-0.044, p=0.86**  
**cor=-0.045, p=0.86**

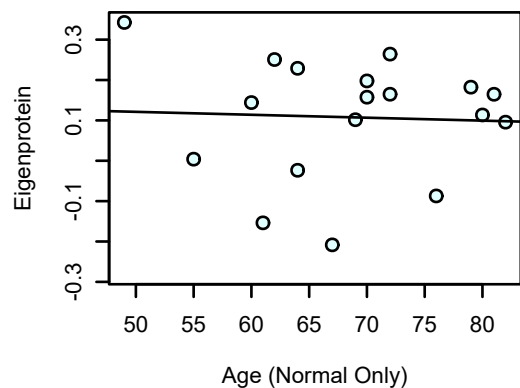

**bicor=-0.28, p=0.28**  
**cor=-0.16, p=0.54**

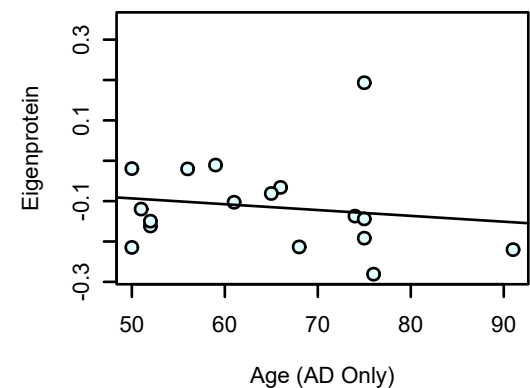

**M29 saddlebrown.CSF38**  
Sugar Metabolism/Actin Depolymerizator

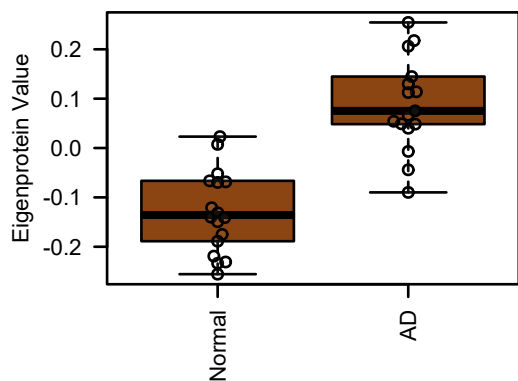

**MEsaddlebrown.Plasma 35 Samp. (Synthetic)**  
ANOVA p: 4.3e-05

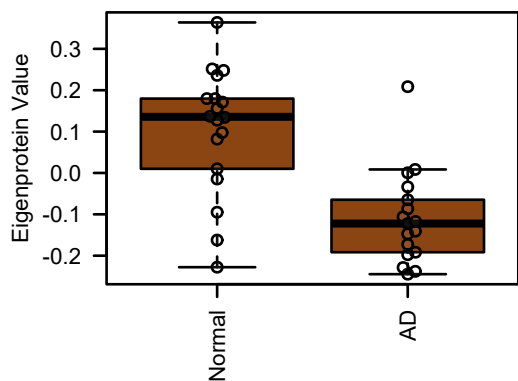

**MEsaddlebrown.Plasma (Synthetic)**  
ANOVA p: 1e-04

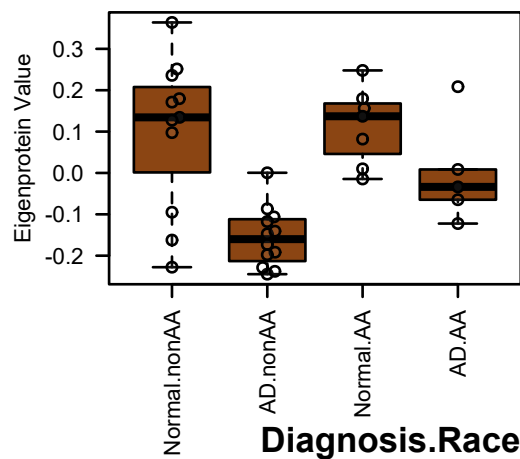

**MEsaddlebrown.Plasma (Synthetic)**  
ANOVA p: 0.00074

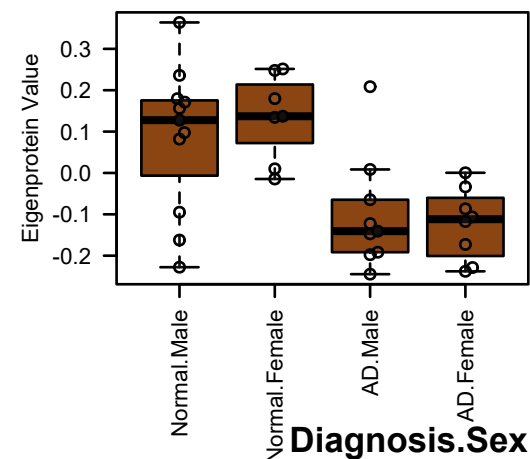

**bicor=0.62, p=6.5e-05**  
**cor=0.6, p=0.00014**

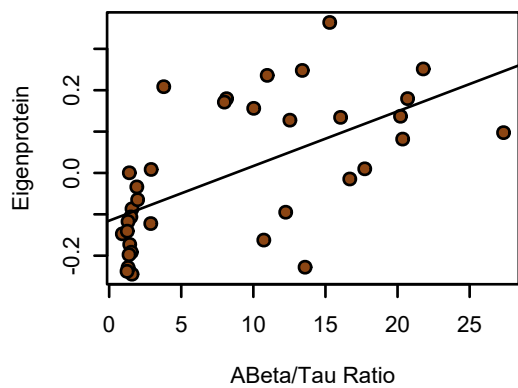

**bicor=0.53, p=0.0024**  
**cor=0.45, p=0.011**

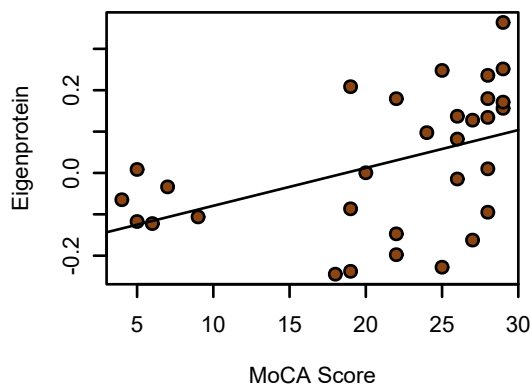

**bicor=-0.028, p=0.91**  
**cor=-0.06, p=0.81**

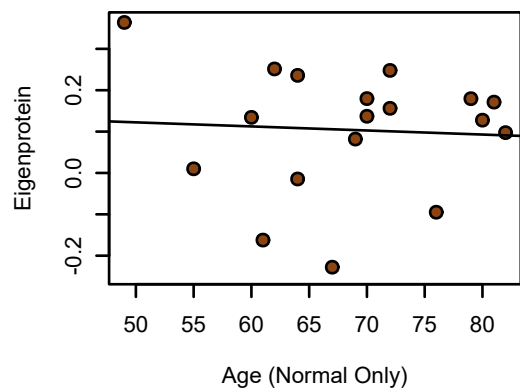

**bicor=-0.23, p=0.37**  
**cor=-0.11, p=0.67**

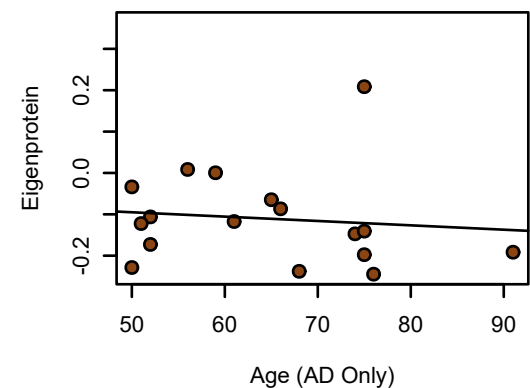



**M24 darkgrey.CSF38  
Ubiquitination**

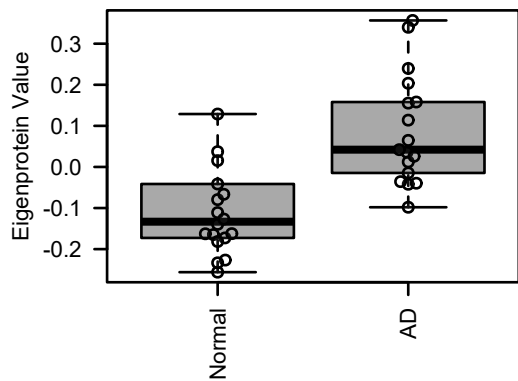

**MEdarkgrey.Plasma 35 Samp. (Synthetic)  
ANOVA p: 1.4e-05**

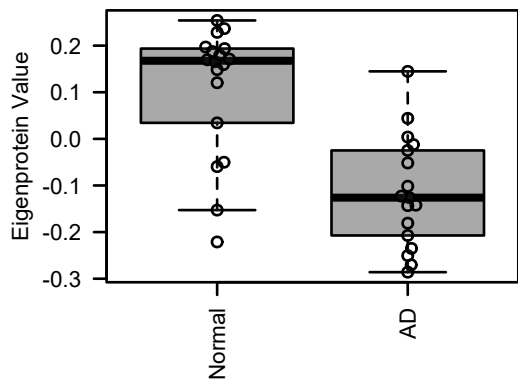

**MEdarkgrey.Plasma (Synthetic)  
ANOVA p: 1.5e-05**

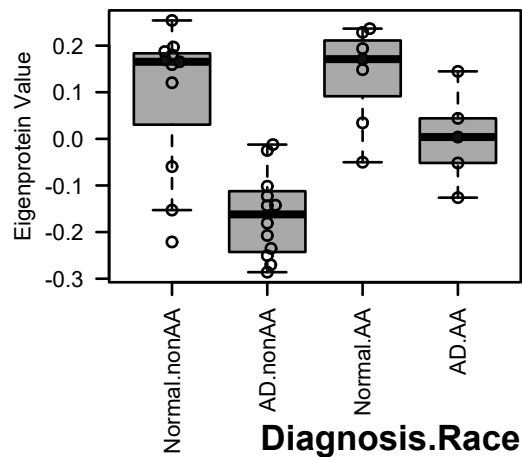

**MEdarkgrey.Plasma (Synthetic)  
ANOVA p: 0.00033**

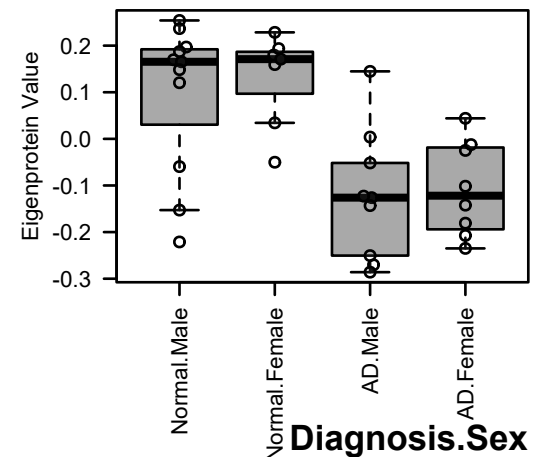

**bicor=0.66, p=1.9e-05  
cor=0.64, p=3.5e-05**

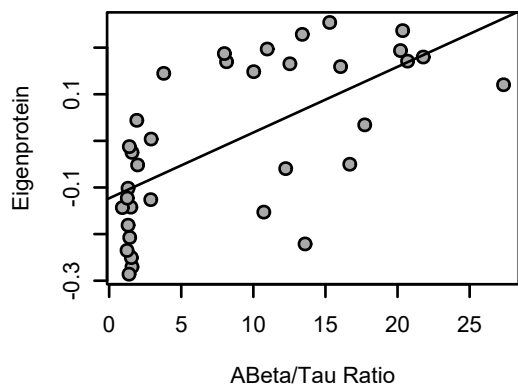

**bicor=0.56, p=0.00097  
cor=0.44, p=0.013**

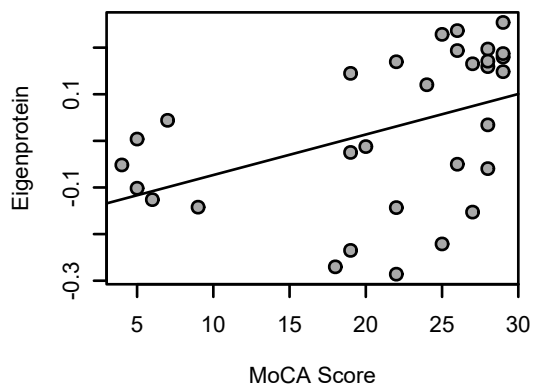

**bicor=-0.057, p=0.82  
cor=0.095, p=0.71**

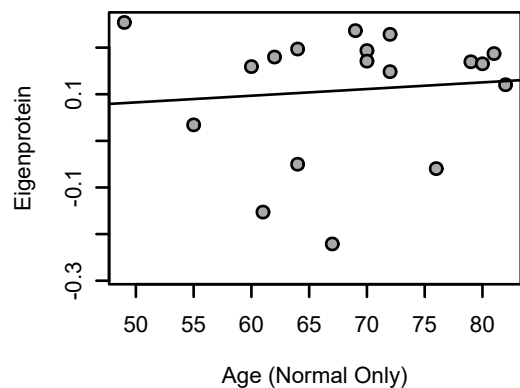

**bicor=-0.29, p=0.25  
cor=-0.28, p=0.28**

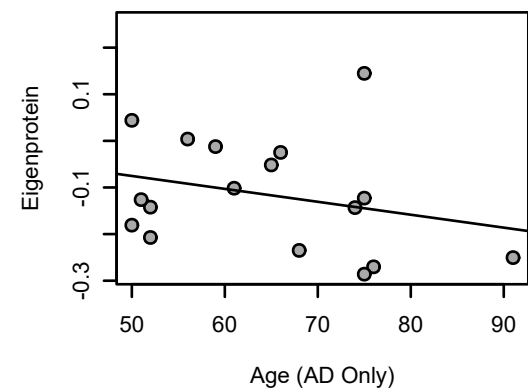

**M35 sienna3.CSF38  
Ambiguous**

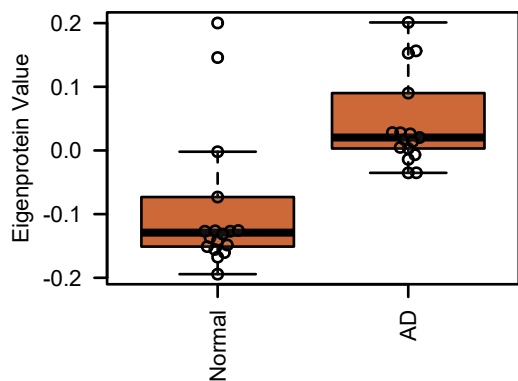

**MEsienna3.Plasma 35 Samp. (Synthetic)  
ANOVA p: 2e-05**

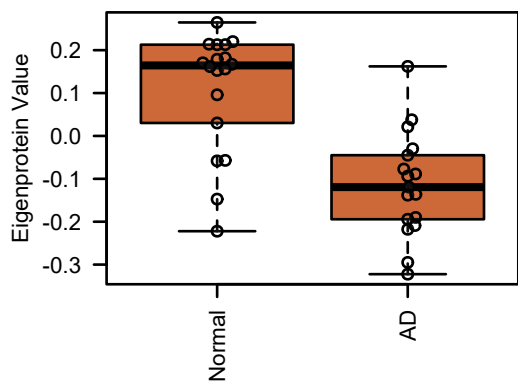

**MEsienna3.Plasma (Synthetic)  
ANOVA p: 2.6e-05**

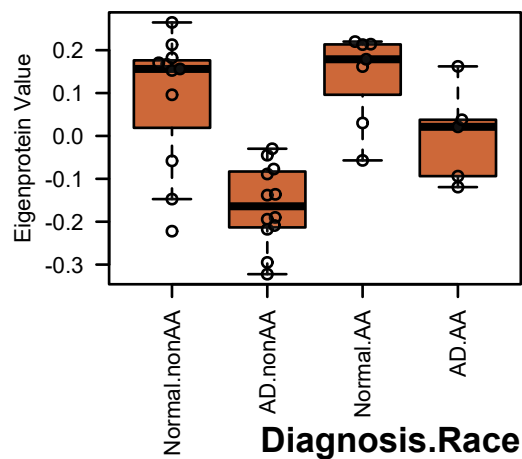

**MEsienna3.Plasma (Synthetic)  
ANOVA p: 0.00044**

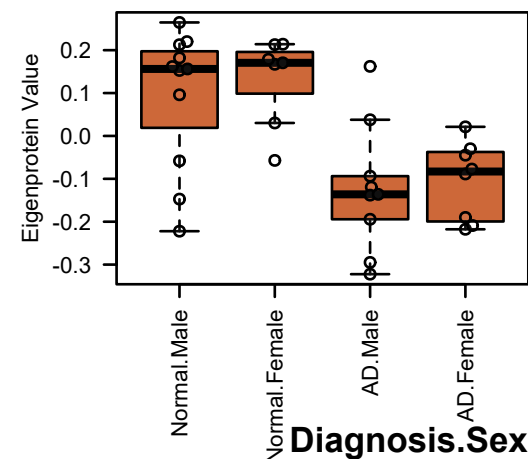

**bicor=0.65, p=2.7e-05  
cor=0.63, p=5e-05**

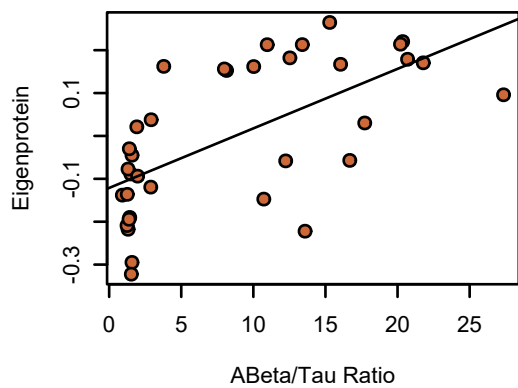

**bicor=0.56, p=0.0012  
cor=0.44, p=0.013**

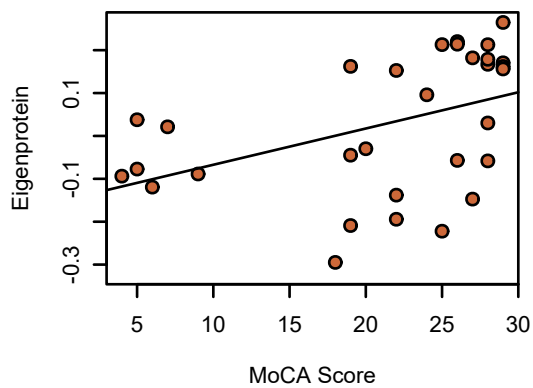

**bicor=-0.048, p=0.85  
cor=0.053, p=0.83**

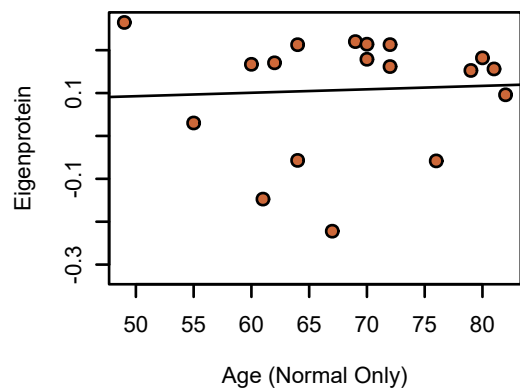

**bicor=-0.36, p=0.16  
cor=-0.33, p=0.2**

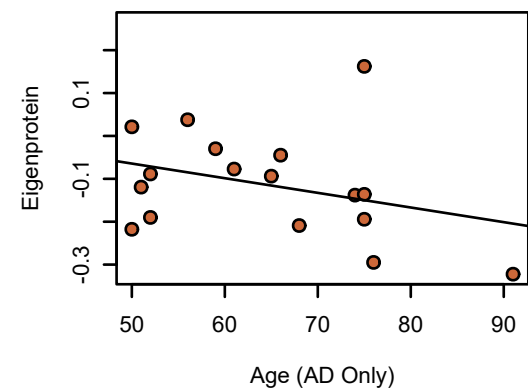

**M33 darkolivegreen.CSF38**  
Translation/Sugar Binding

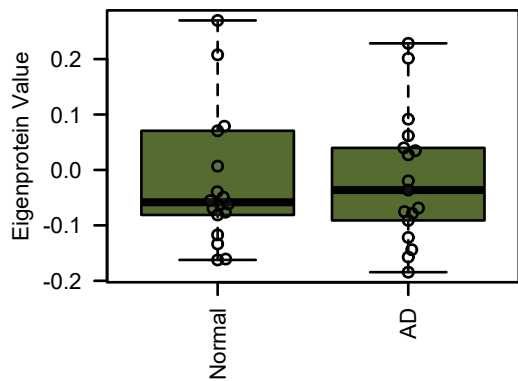

**MEdarkolivegreen.Plasma 35 Samp. (Synthet**  
ANOVA p: 2.2e-05

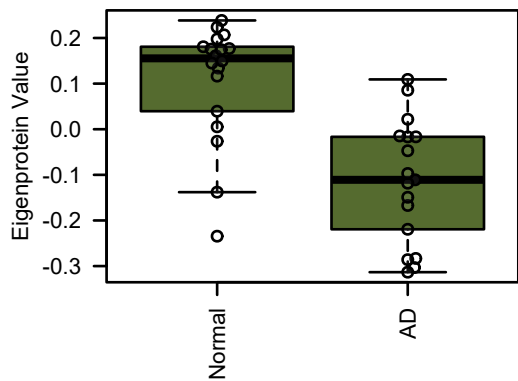

**MEdarkolivegreen.Plasma (Synthetic)**  
ANOVA p: 1.4e-05

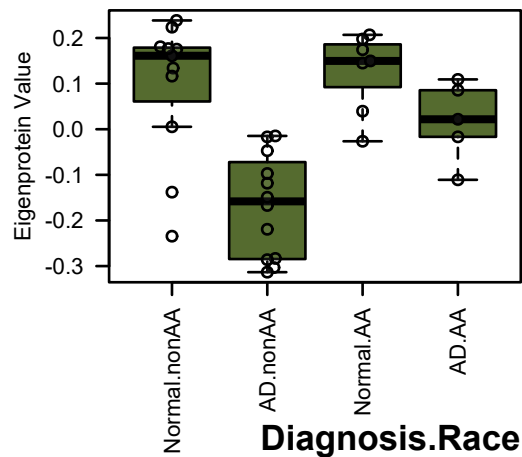

**MEdarkolivegreen.Plasma (Synthetic)**  
ANOVA p: 0.00053

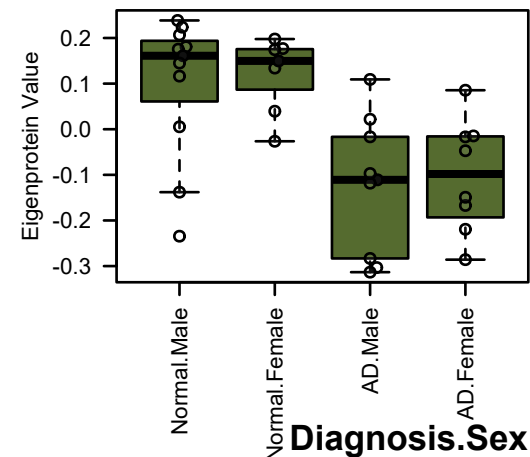

**bicor=0.63, p=4.9e-05**  
**cor=0.62, p=7.1e-05**

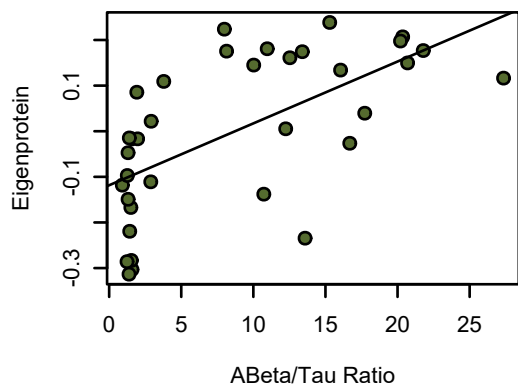

**bicor=0.58, p=0.00059**  
**cor=0.39, p=0.03**

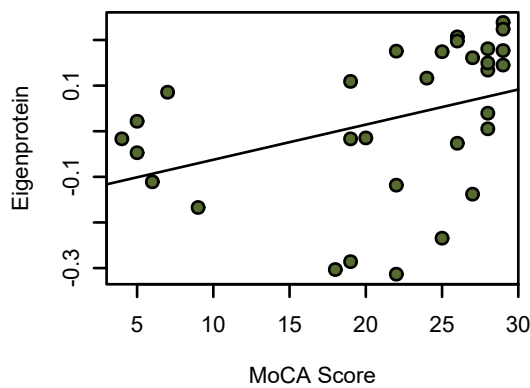

**bicor=0.078, p=0.76**  
**cor=0.15, p=0.55**

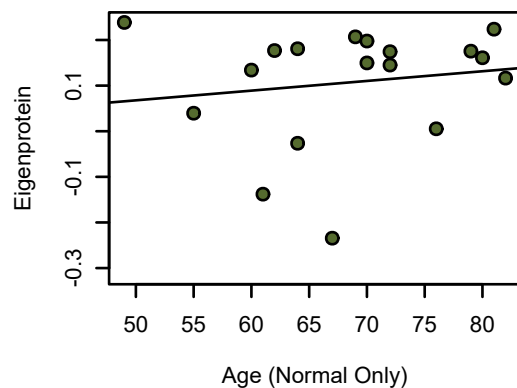

**bicor=-0.34, p=0.19**  
**cor=-0.35, p=0.17**

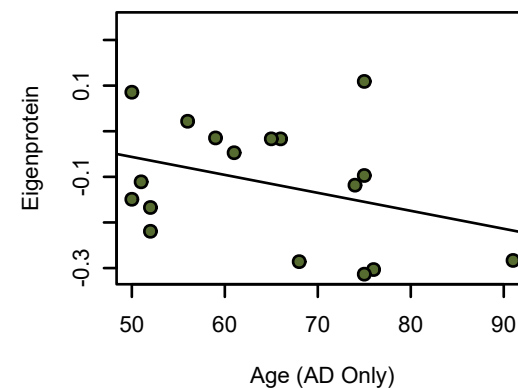

**M36 yellowgreen.CSF38**  
Organelle Organization/Biogenesis

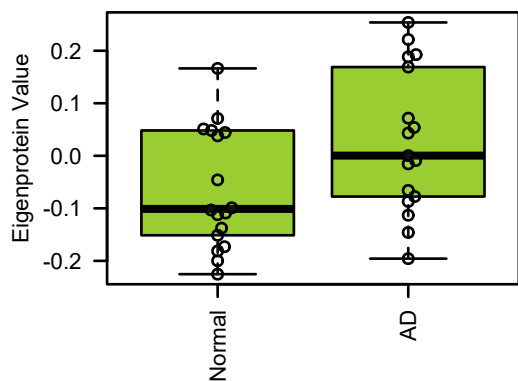

**MEyellowgreen.Plasma 35 Samp. (Syntheti**  
ANOVA p: 3.9e-05

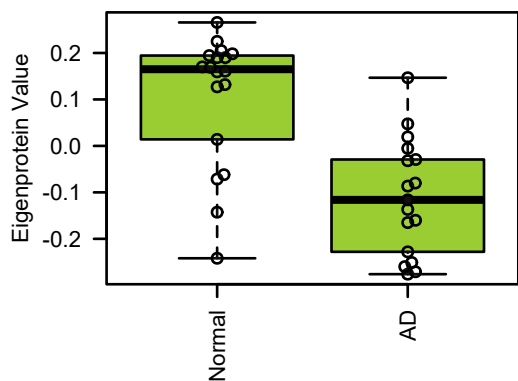

**MEyellowgreen.Plasma (Synthetic)**  
ANOVA p: 2.8e-05

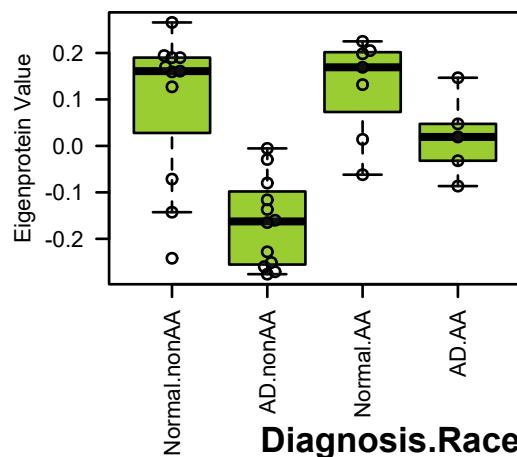

**MEyellowgreen.Plasma (Synthetic)**  
ANOVA p: 0.00084

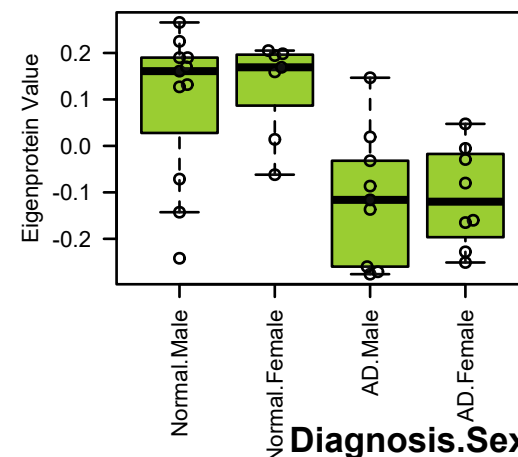

**bicor=0.64, p=3.7e-05**  
**cor=0.63, p=5e-05**

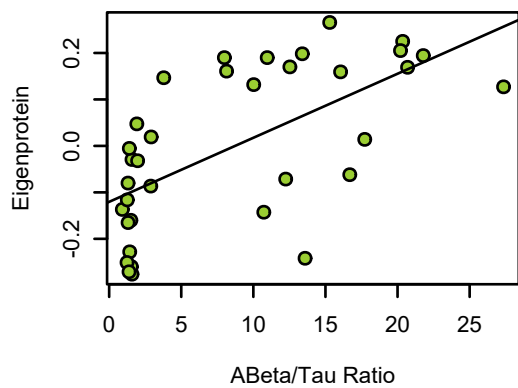

**bicor=0.53, p=0.0024**  
**cor=0.4, p=0.026**

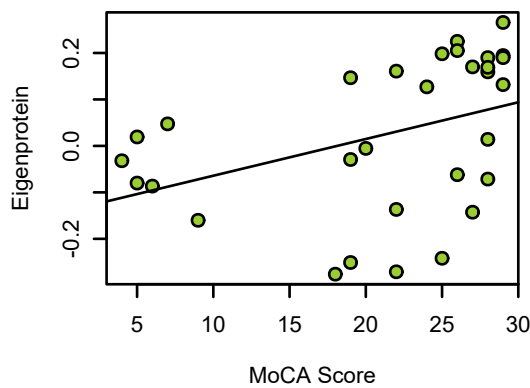

**bicor=-0.098, p=0.7**  
**cor=0.085, p=0.74**

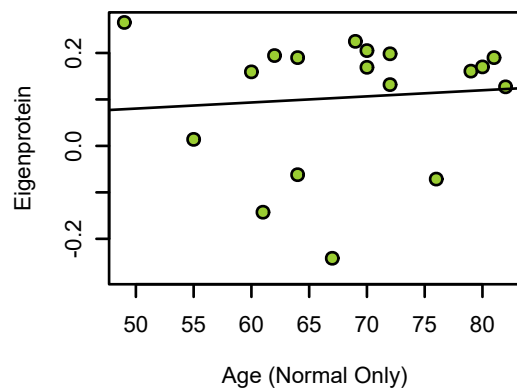

**bicor=-0.3, p=0.24**  
**cor=-0.29, p=0.26**

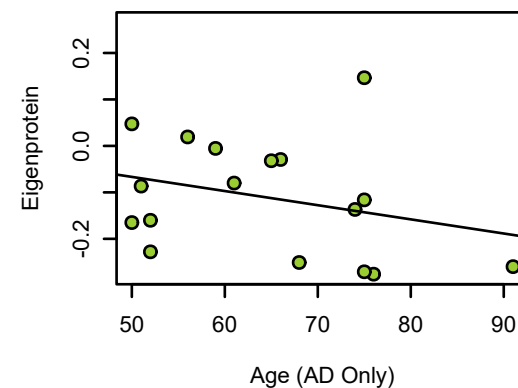

**M1 turquoise.CSF38  
Immune Response**

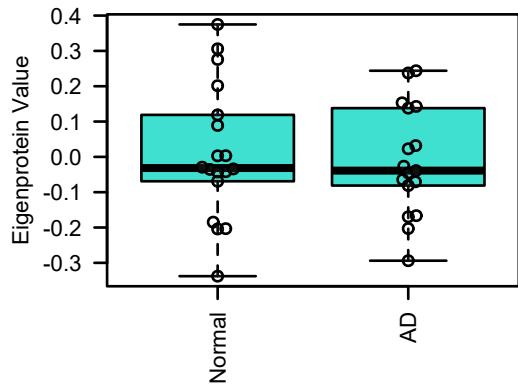

**MEturquoise.Plasma 35 Samp. (Synthetic)  
ANOVA p: 2.5e-05**

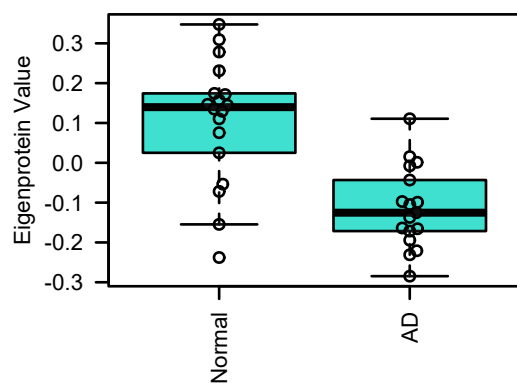

**MEturquoise.Plasma (Synthetic)  
ANOVA p: 0.00011**

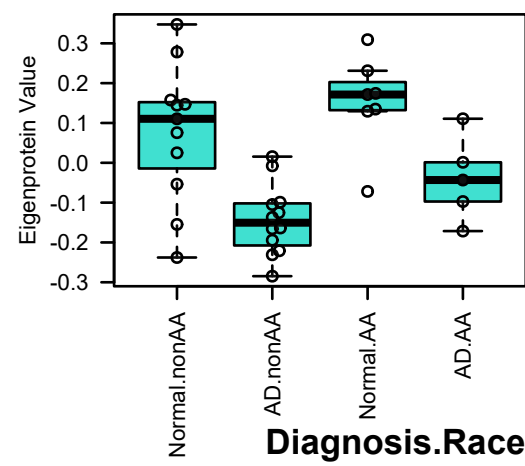

**MEturquoise.Plasma (Synthetic)  
ANOVA p: 0.00041**

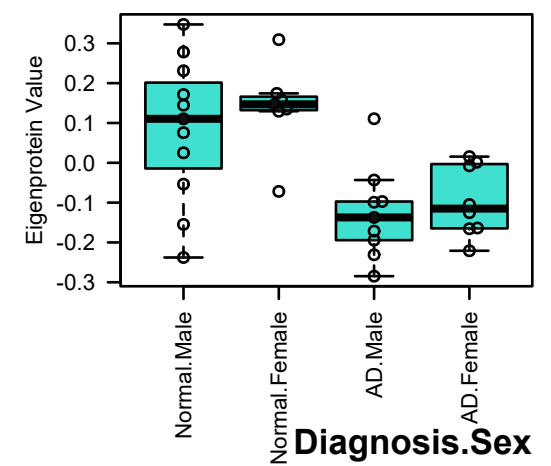

**bicor=0.64, p=2.9e-05  
cor=0.62, p=7.1e-05**

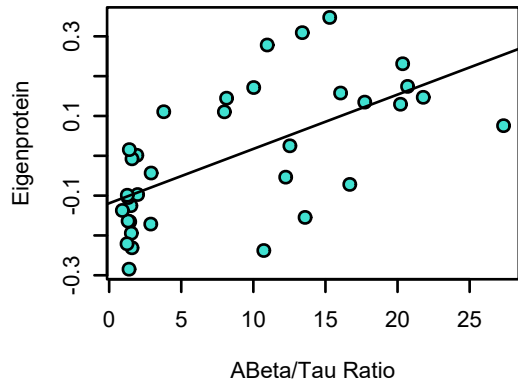

**bicor=0.55, p=0.0014  
cor=0.48, p=0.0063**

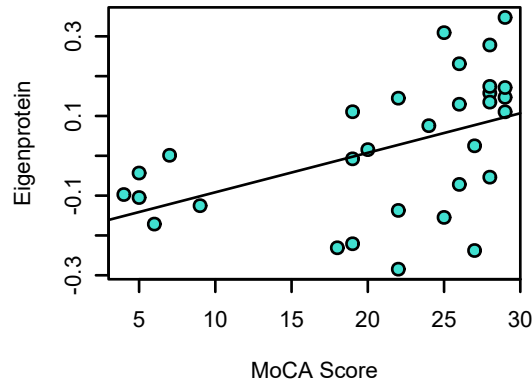

**bicor=-0.2, p=0.42  
cor=-0.15, p=0.55**

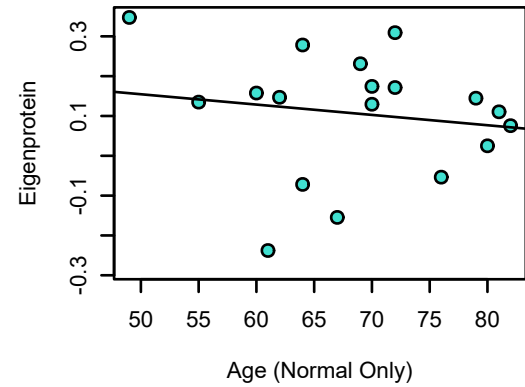

**bicor=-0.24, p=0.36  
cor=-0.2, p=0.44**

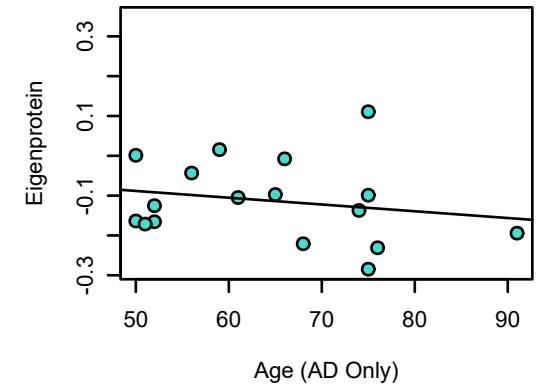

**M4 yellow.CSF38  
Lysosome**

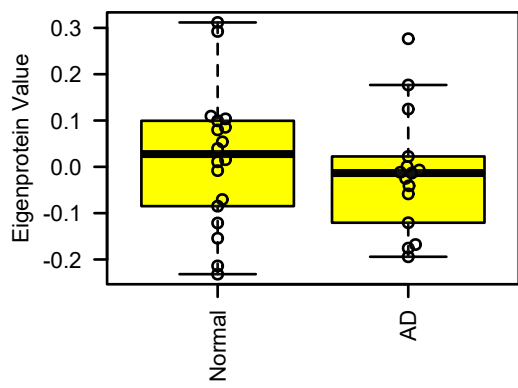

**MEyellow.Plasma 35 Samp. (Synthetic)  
ANOVA p: 0.00065**

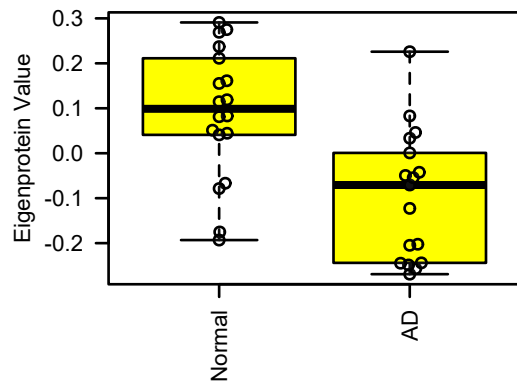

**MEyellow.Plasma (Synthetic)  
ANOVA p: 0.00046**

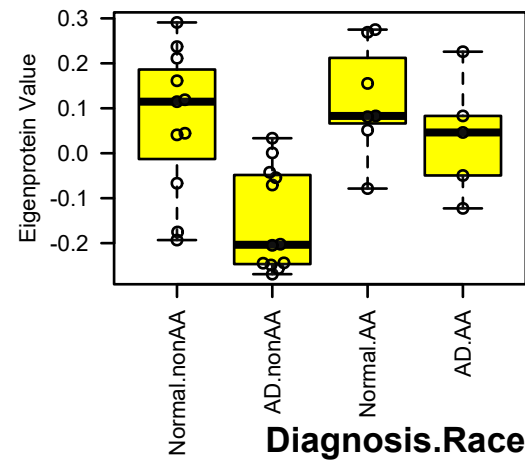

**MEyellow.Plasma (Synthetic)  
ANOVA p: 0.0072**

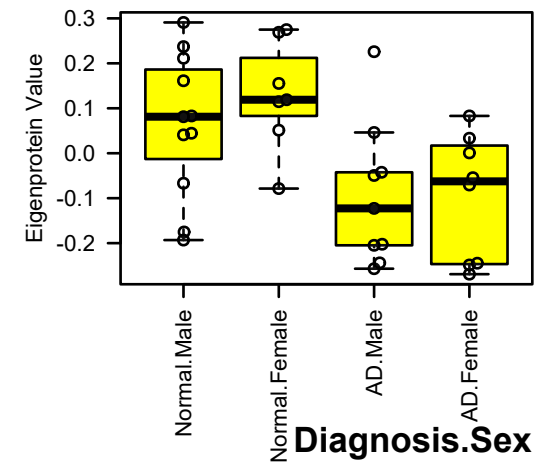

**bicor=0.55, p=7e-04  
cor=0.56, p=0.00047**

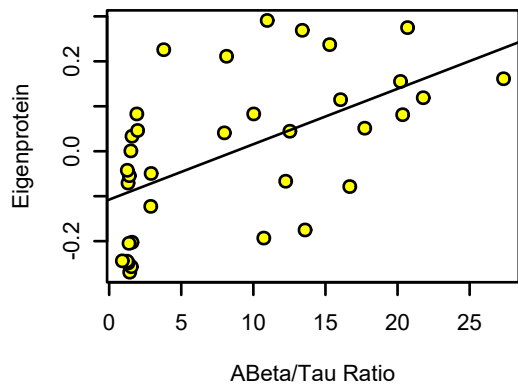

**bicor=0.4, p=0.028  
cor=0.28, p=0.13**

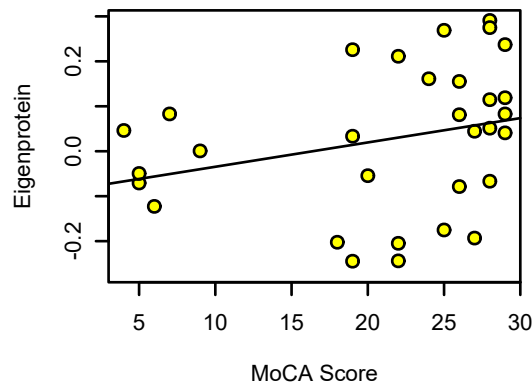

**bicor=0.027, p=0.91  
cor=0.023, p=0.93**

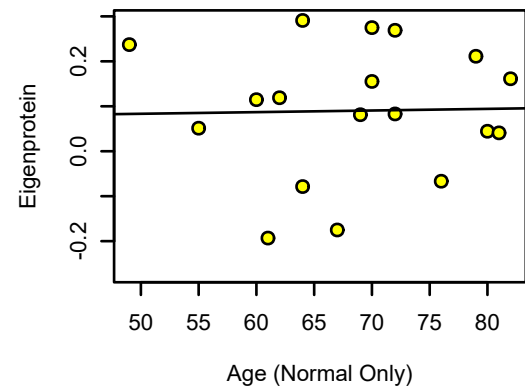

**bicor=-0.14, p=0.6  
cor=-0.15, p=0.57**

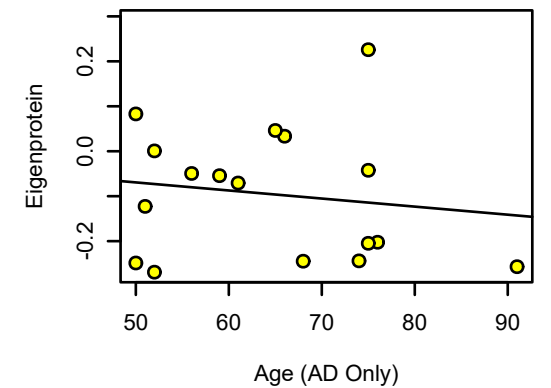

**M23 darkturquoise.CSF38**  
Nucleic Acid/Steroid Metabolism

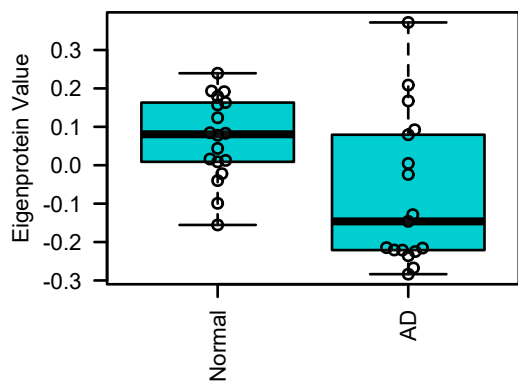

**MEdarkturquoise.Plasma 35 Samp. (Synthel)**  
ANOVA p: 0.00043

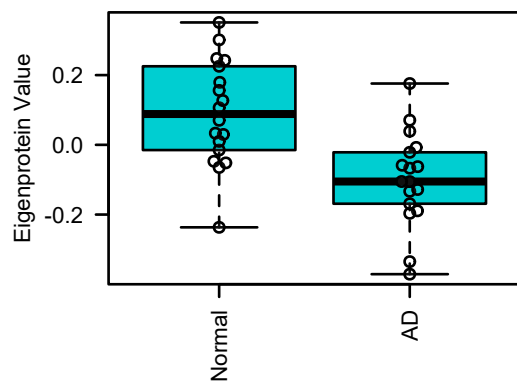

**MEdarkturquoise.Plasma (Synthetic)**  
ANOVA p: 0.0016

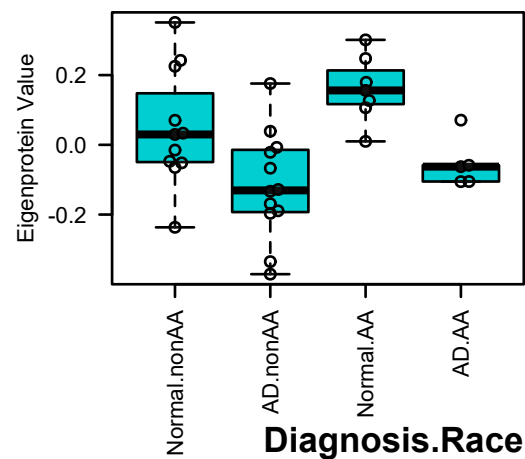

**MEdarkturquoise.Plasma (Synthetic)**  
ANOVA p: 4e-04

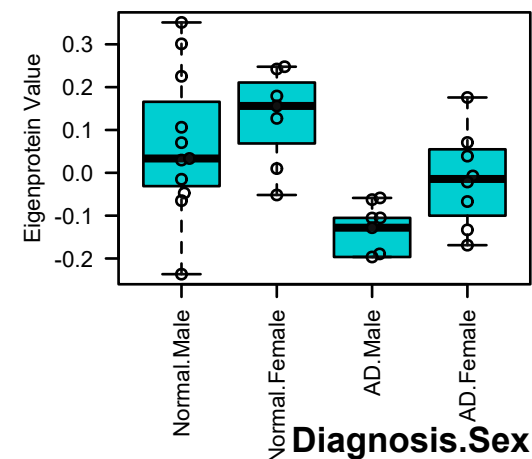

**bicor=0.58, p=0.00024**  
**cor=0.56, p=0.00047**

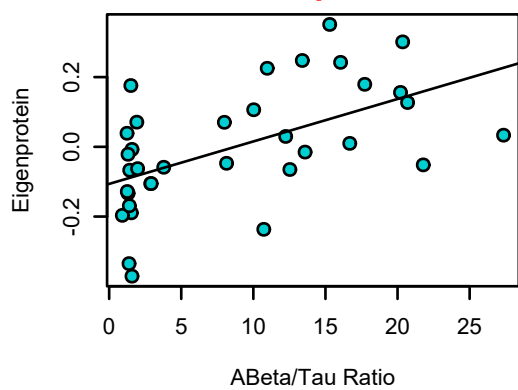

**bicor=0.44, p=0.013**  
**cor=0.3, p=0.1**

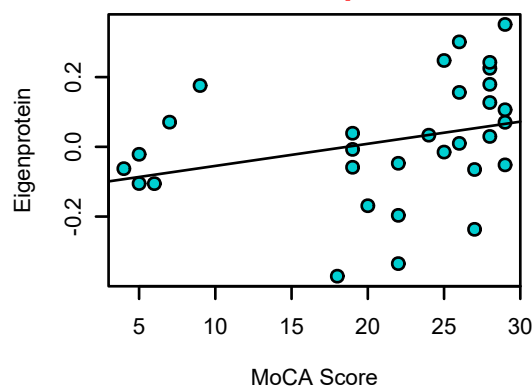

**bicor=-0.34, p=0.17**  
**cor=-0.34, p=0.17**

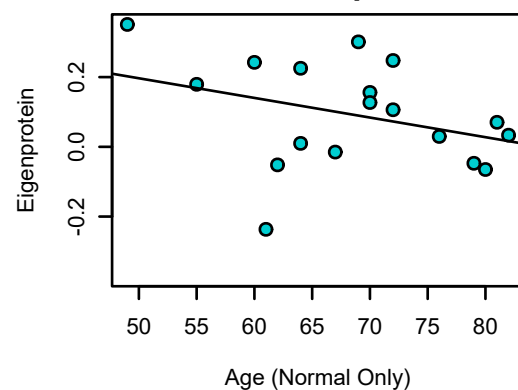

**bicor=-0.53, p=0.028**  
**cor=-0.53, p=0.029**

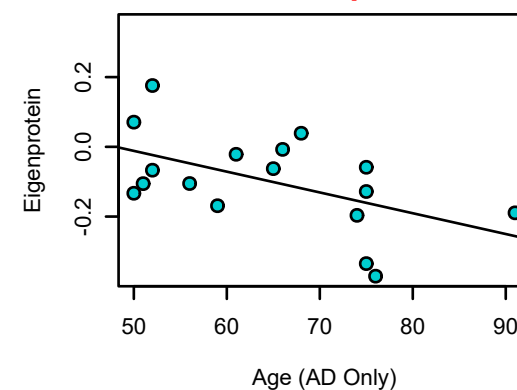

**M20 royalblue.CSF38**  
Ambiguous

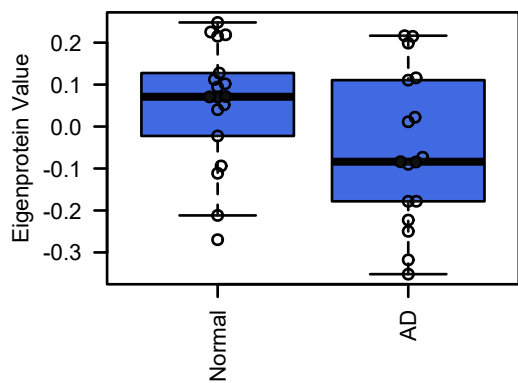

**MEroyalblue.Plasma 35 Samp. (Synthetic)**  
ANOVA p: 0.00039

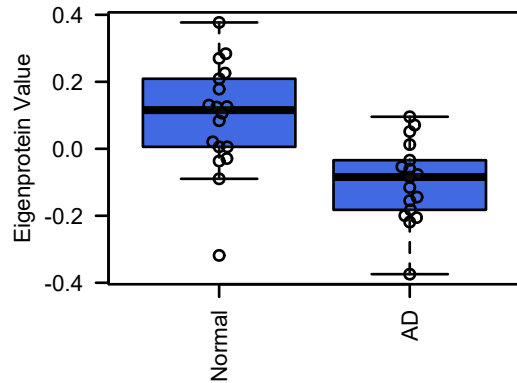

**MEroyalblue.Plasma (Synthetic)**  
ANOVA p: 0.0011

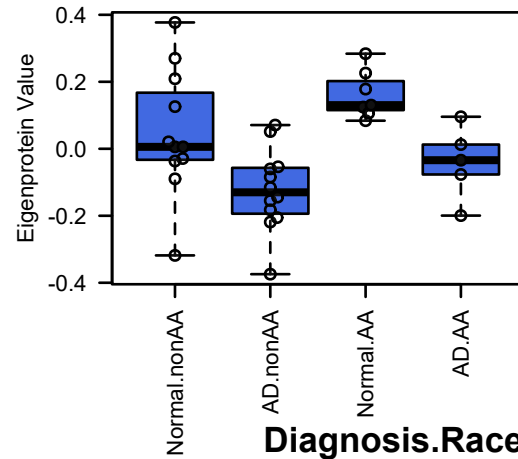

**MEroyalblue.Plasma (Synthetic)**  
ANOVA p: 0.0034

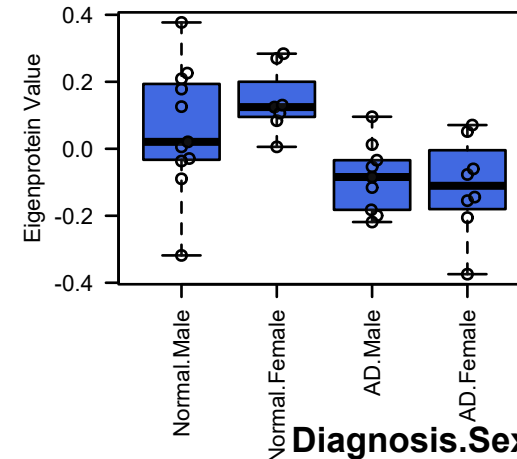

**bicor=0.61, p=9.9e-05**  
**cor=0.58, p=0.00026**

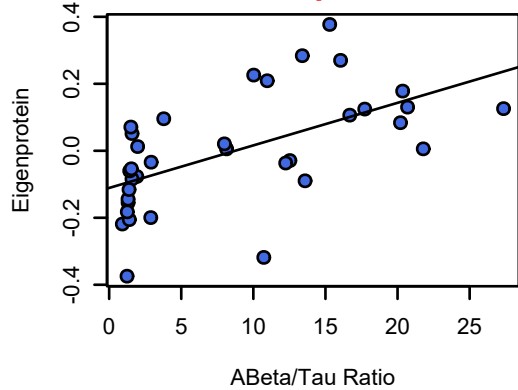

**bicor=0.49, p=0.0055**  
**cor=0.39, p=0.03**

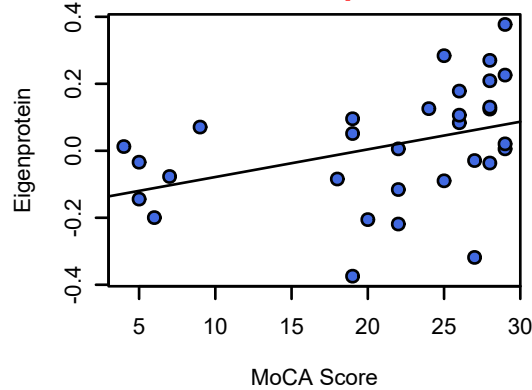

**bicor=-0.29, p=0.24**  
**cor=-0.26, p=0.3**

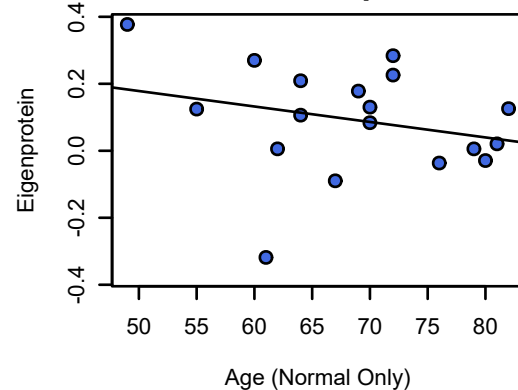

**bicor=0.0045, p=0.99**  
**cor=-0.0013, p=1**

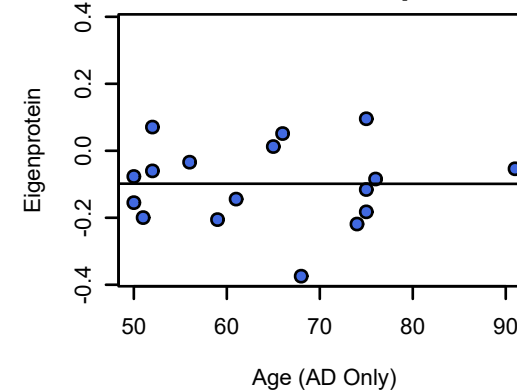

**M22 darkgreen.CSF38**  
**ECM/Actin Binding**

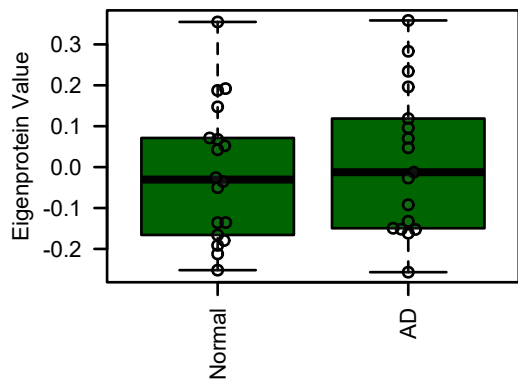

**MEdarkgreen.Plasma 35 Samp. (Synthetic)**  
**ANOVA p: 0.26**

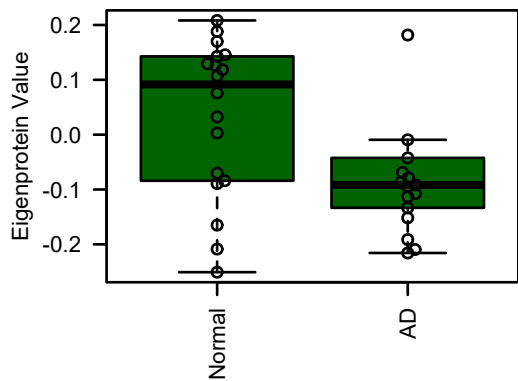

**MEdarkgreen.Plasma (Synthetic)**  
**ANOVA p: 0.63**

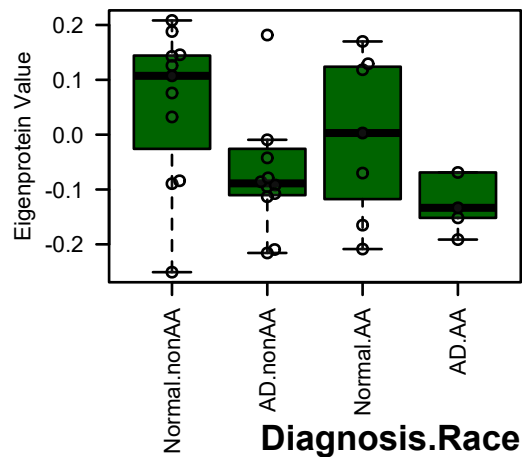

**MEdarkgreen.Plasma (Synthetic)**  
**ANOVA p: 0.059**

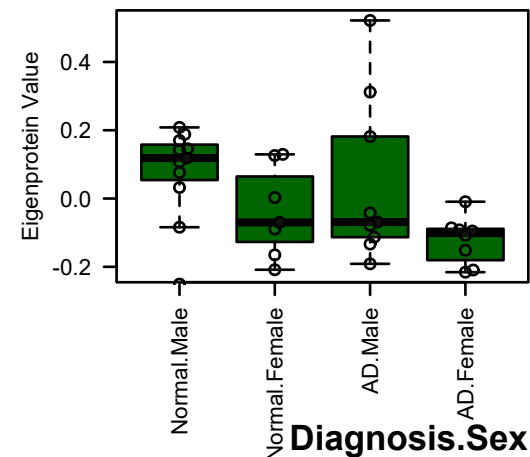

**bicor=0.29, p=0.096**  
**cor=0.2, p=0.25**

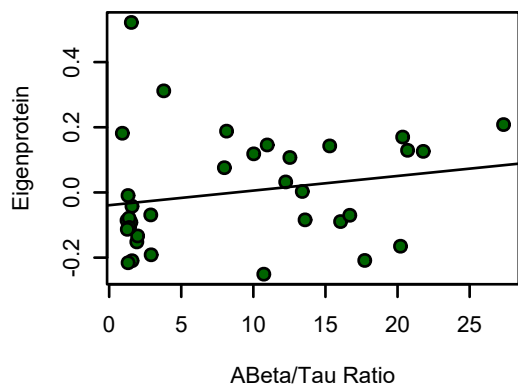

**bicor=0.2, p=0.28**  
**cor=0.36, p=0.047**

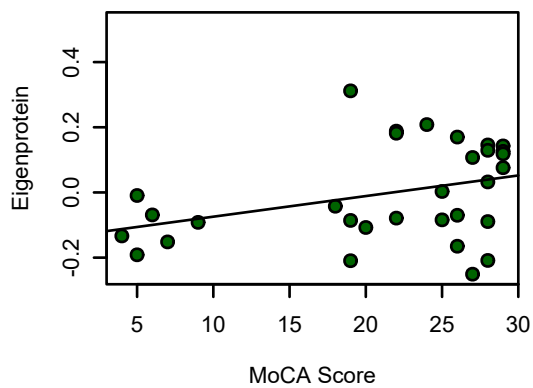

**bicor=0.42, p=0.082**  
**cor=0.41, p=0.091**

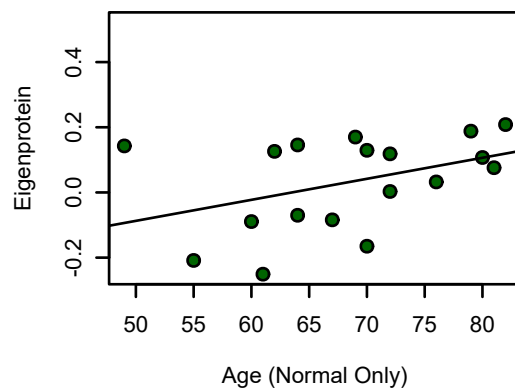

**bicor=0.38, p=0.13**  
**cor=0.71, p=0.0014**

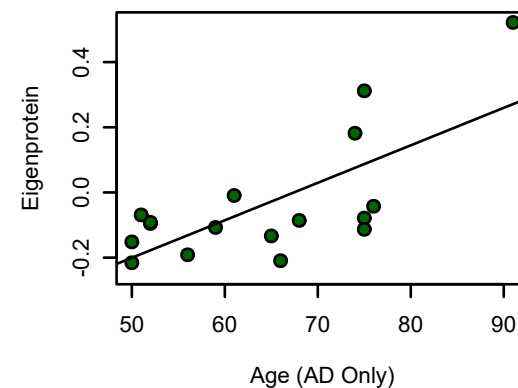

**M26 darkorange.CSF38**  
**TGF-? Signaling**

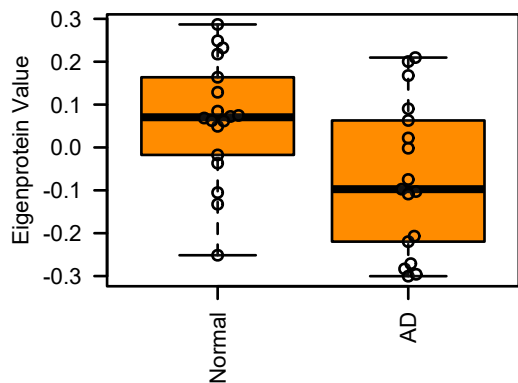

**MEdarkorange.Plasma 35 Samp. (Synthetic)**  
**ANOVA p: 0.094**

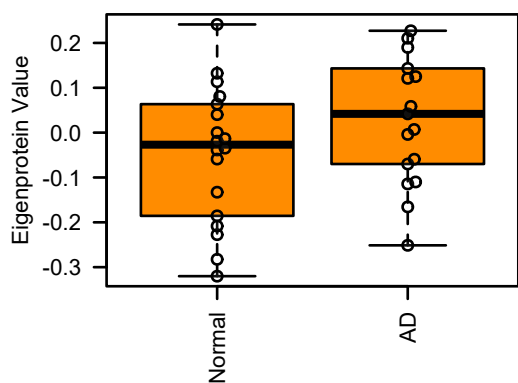

**MEdarkorange.Plasma (Synthetic)**  
**ANOVA p: 0.03**

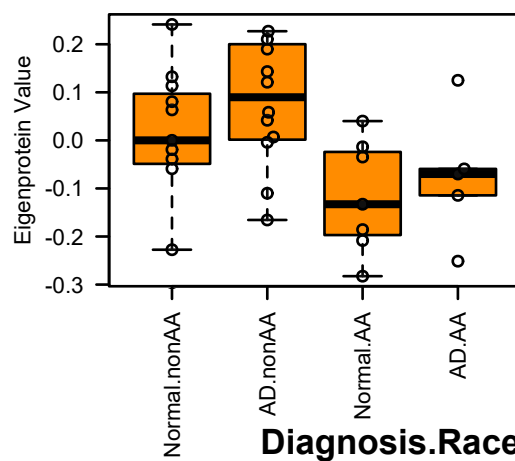

**MEdarkorange.Plasma (Synthetic)**  
**ANOVA p: 0.16**

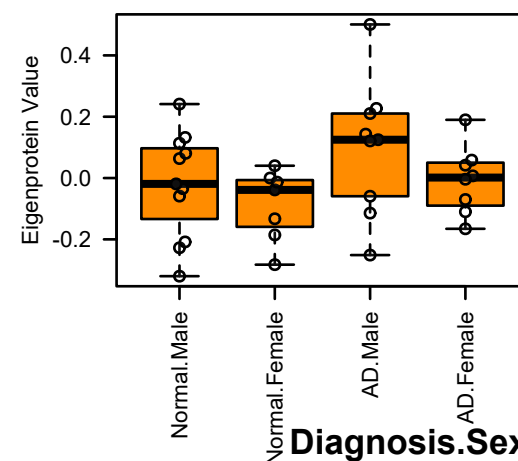

**bicor=-0.26, p=0.14**  
**cor=-0.25, p=0.15**

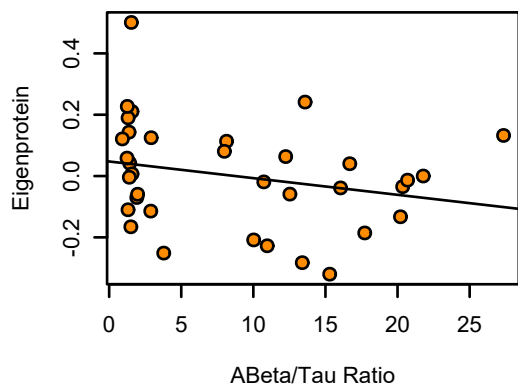

**bicor=-0.18, p=0.35**  
**cor=-0.04, p=0.83**

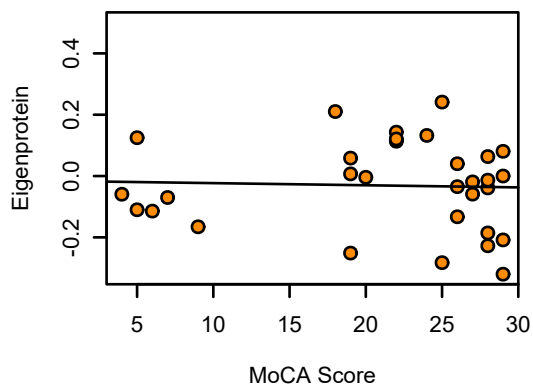

**bicor=0.47, p=0.05**  
**cor=0.48, p=0.044**

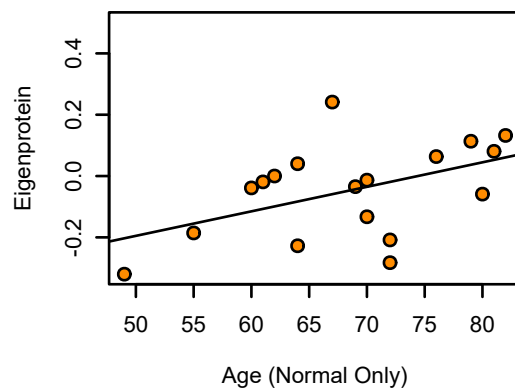

**bicor=0.5, p=0.043**  
**cor=0.55, p=0.022**

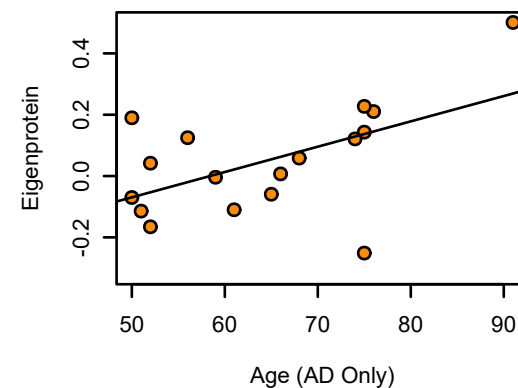

**M18 lightgreen.CSF38**  
ECM Organization/Scavenger Receptor

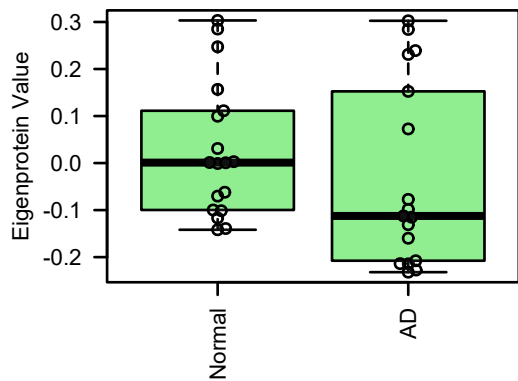

**MElightgreen.Plasma 35 Samp. (Synthetic)**  
ANOVA p: 0.015

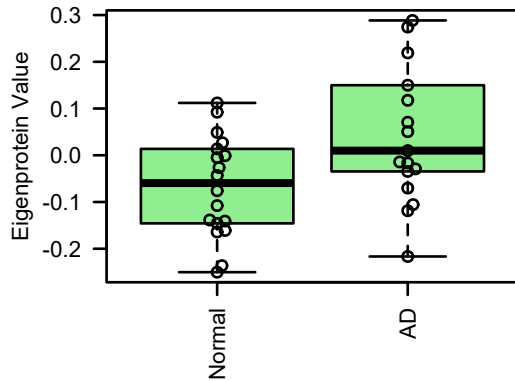

**MElightgreen.Plasma (Synthetic)**  
ANOVA p: 0.0032

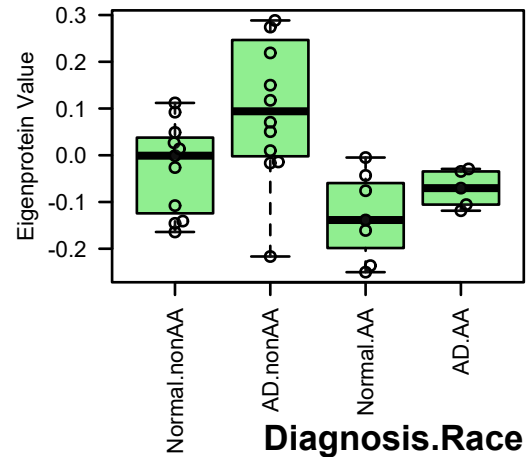

**MElightgreen.Plasma (Synthetic)**  
ANOVA p: 0.0014

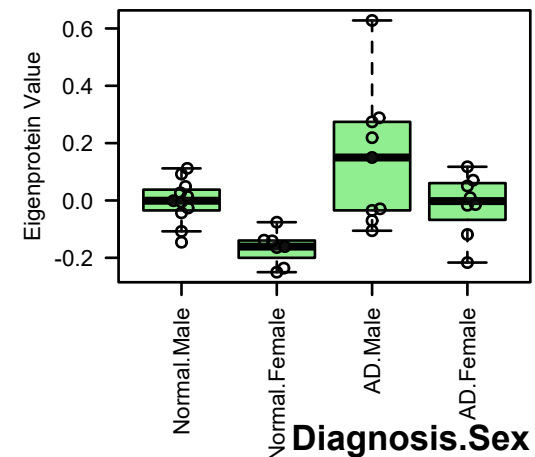

**bicor=-0.47, p=0.0046**  
**cor=-0.44, p=0.0082**

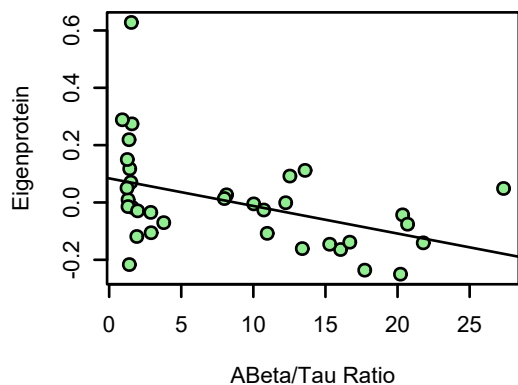

**bicor=-0.31, p=0.089**  
**cor=-0.12, p=0.52**

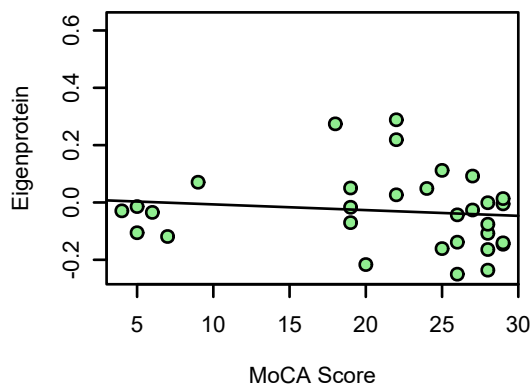

**bicor=0.65, p=0.0034**  
**cor=0.63, p=0.0051**

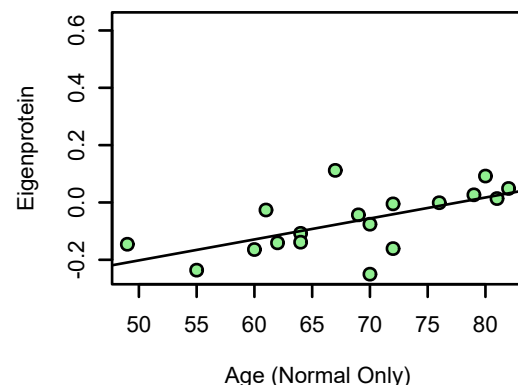

**bicor=0.58, p=0.014**  
**cor=0.72, p=0.0011**

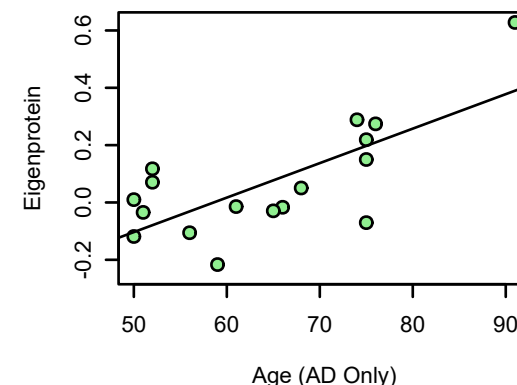

**M3 brown.CSF38**  
Complement/Protein Activation Cascade

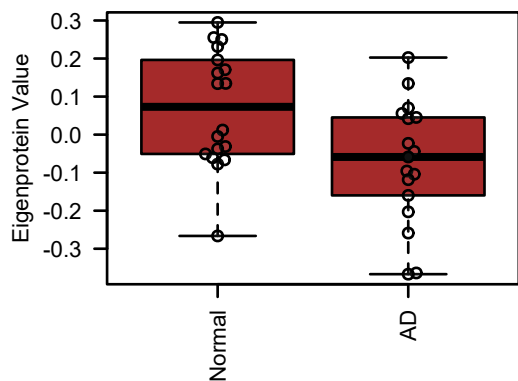

**MEbrown.Plasma 35 Samp. (Synthetic)**  
ANOVA p: 0.019

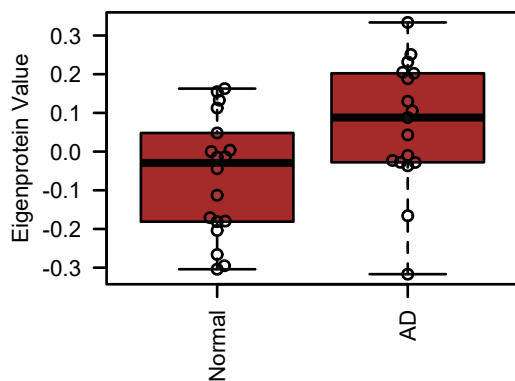

**MEbrown.Plasma (Synthetic)**  
ANOVA p: 0.069

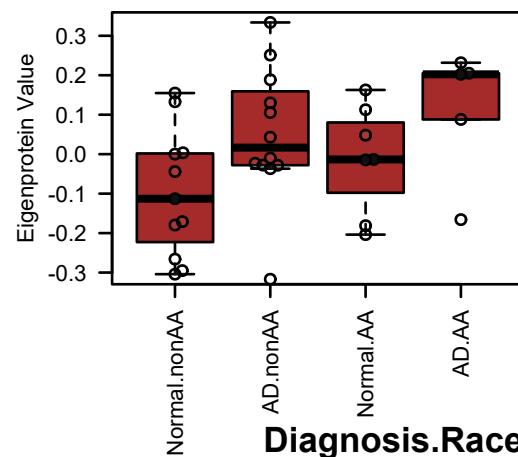

**MEbrown.Plasma (Synthetic)**  
ANOVA p: 0.035

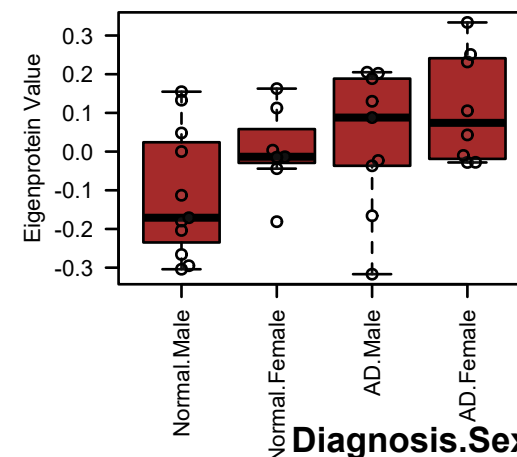

**bicor=-0.31, p=0.07**  
**cor=-0.32, p=0.061**

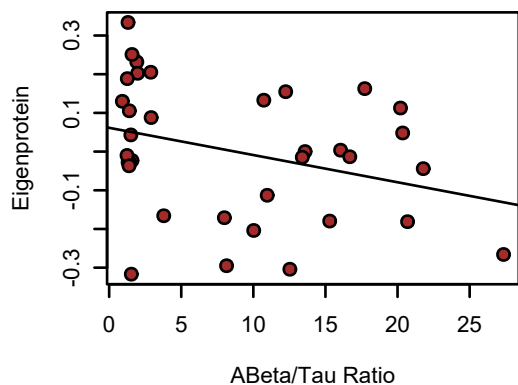

**bicor=-0.38, p=0.035**  
**cor=-0.55, p=0.0013**

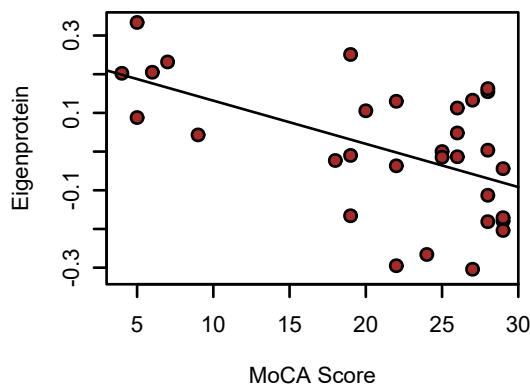

**bicor=-0.43, p=0.074**  
**cor=-0.45, p=0.061**

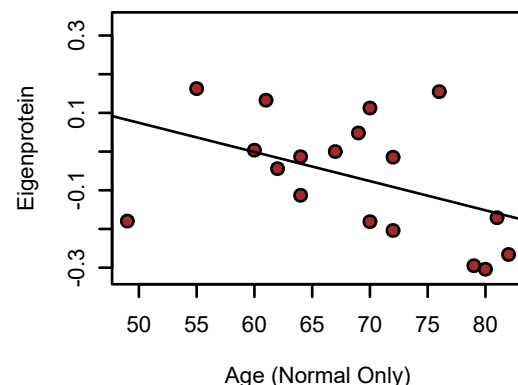

**bicor=-0.42, p=0.097**  
**cor=-0.49, p=0.046**

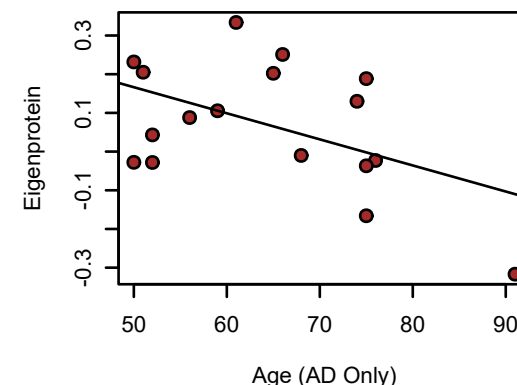

**M10 purple.CSF38**  
**Ossification/Bone Development**

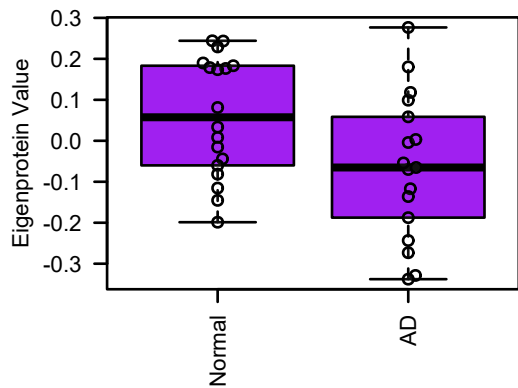

**MEpurple.Plasma 35 Samp. (Synthetic)**  
**ANOVA p: 0.39**

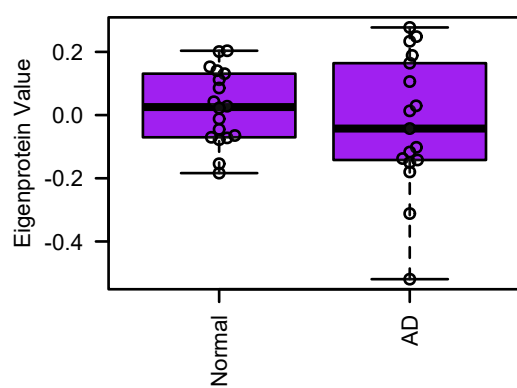

**MEpurple.Plasma (Synthetic)**  
**ANOVA p: 0.51**

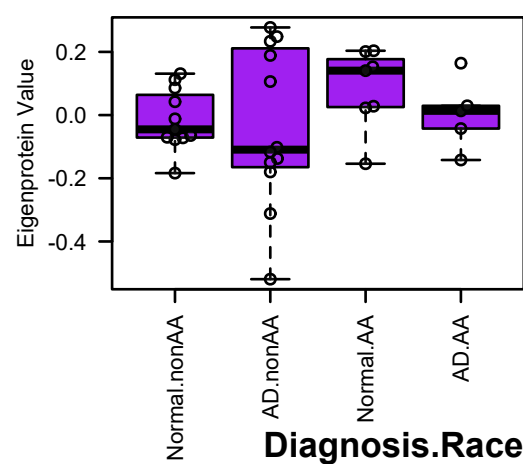

**MEpurple.Plasma (Synthetic)**  
**ANOVA p: 0.038**

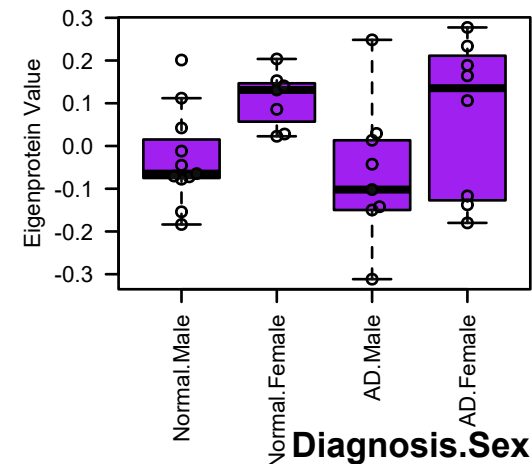

**bicor=0.26, p=0.13**  
**cor=0.26, p=0.13**

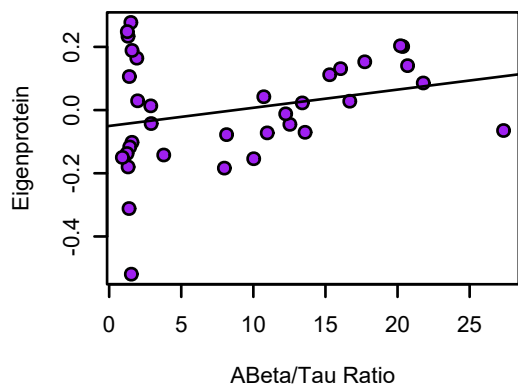

**bicor=0.0099, p=0.96**  
**cor=-0.19, p=0.31**

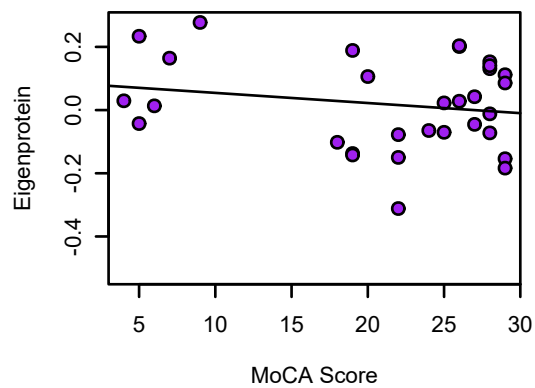

**bicor=-0.57, p=0.013**  
**cor=-0.56, p=0.016**

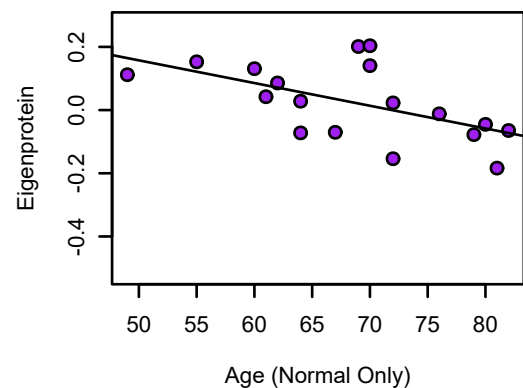

**bicor=-0.48, p=0.05**  
**cor=-0.53, p=0.029**

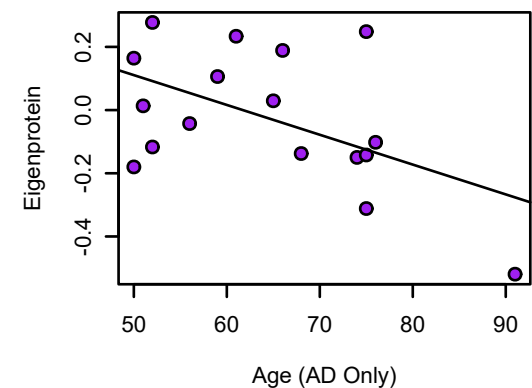

**Data Subset:**

**CSF 37 of 38 modules as template**



# M8 pink: Autophagy

slopeDiff(AD-CT): -0.49

Normal:

AD:

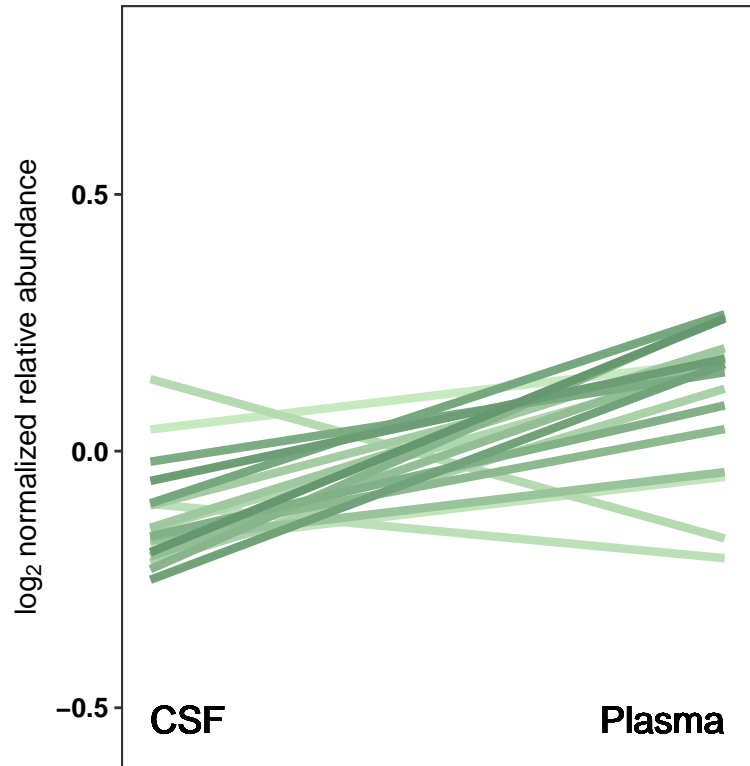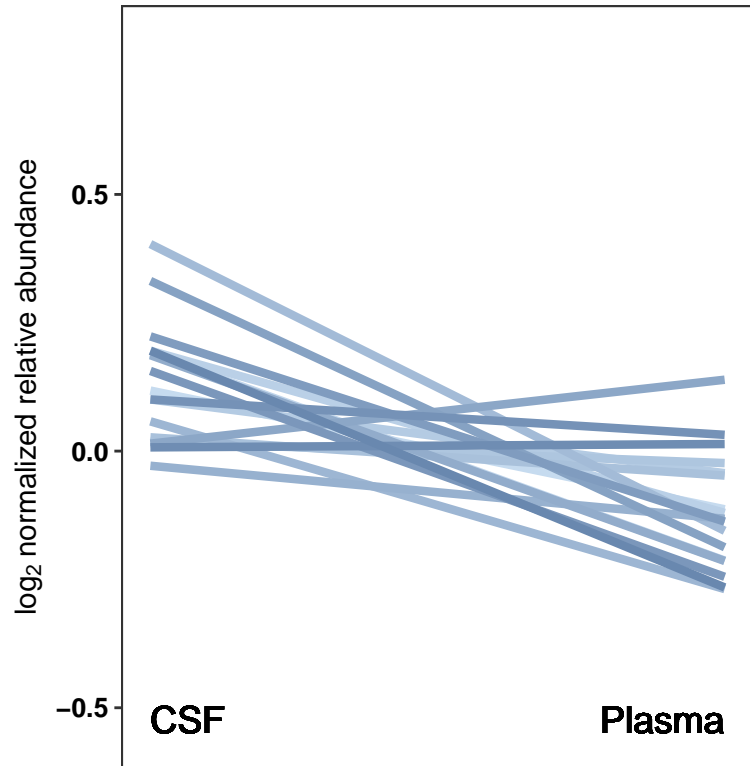

# M15 midnightblue: Post-Synaptic Membrane

slopeDiff(AD-CT): -0.461

Normal:

AD:

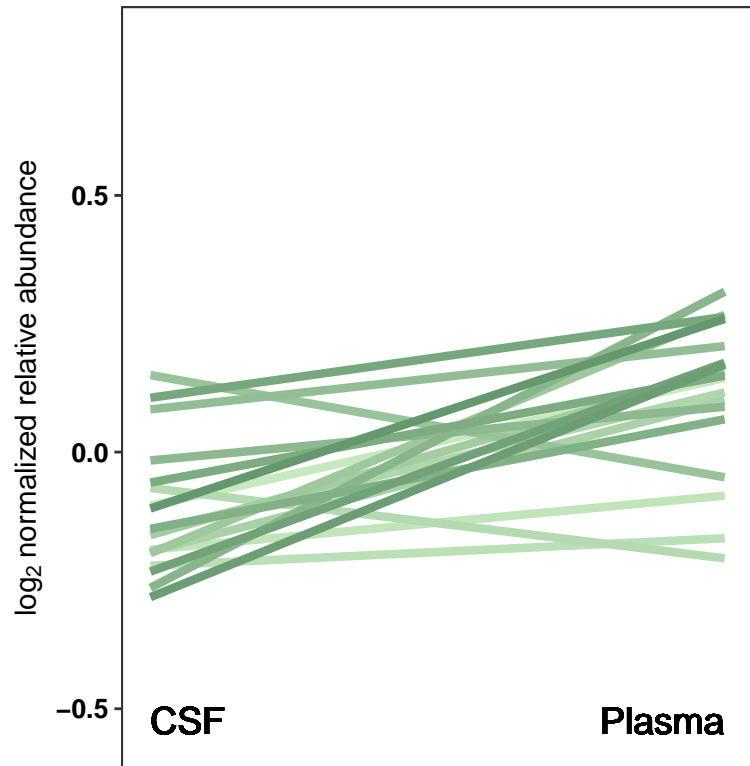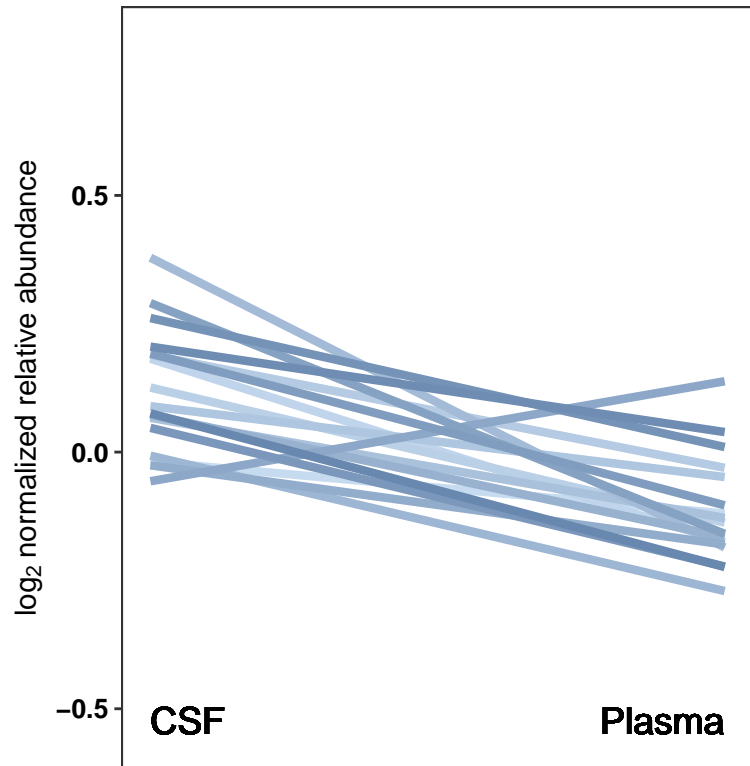

# M29 saddlebrown: Sugar Metabolism/Actin Depolymerization

slopeDiff(AD-CT): -0.417

Normal:

AD:

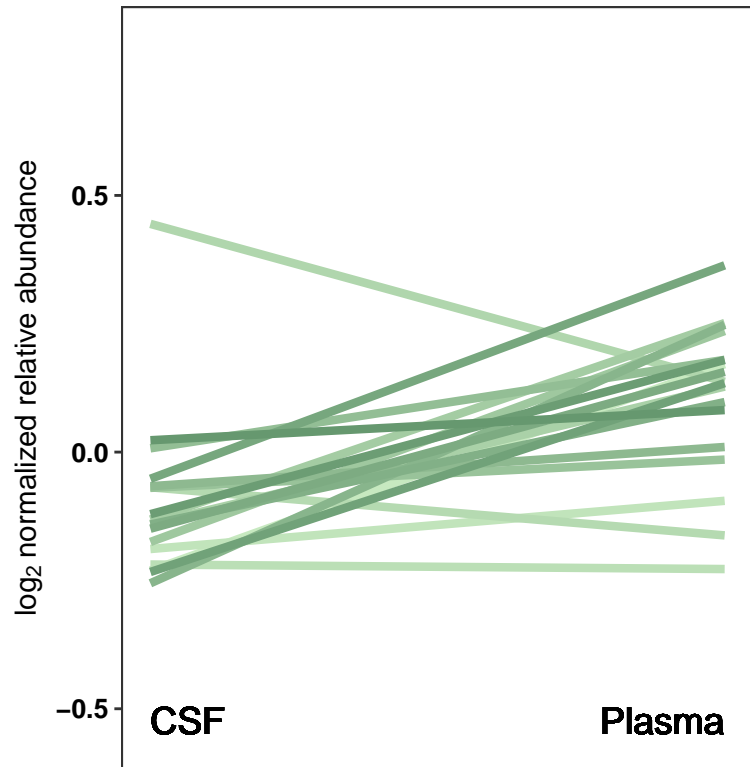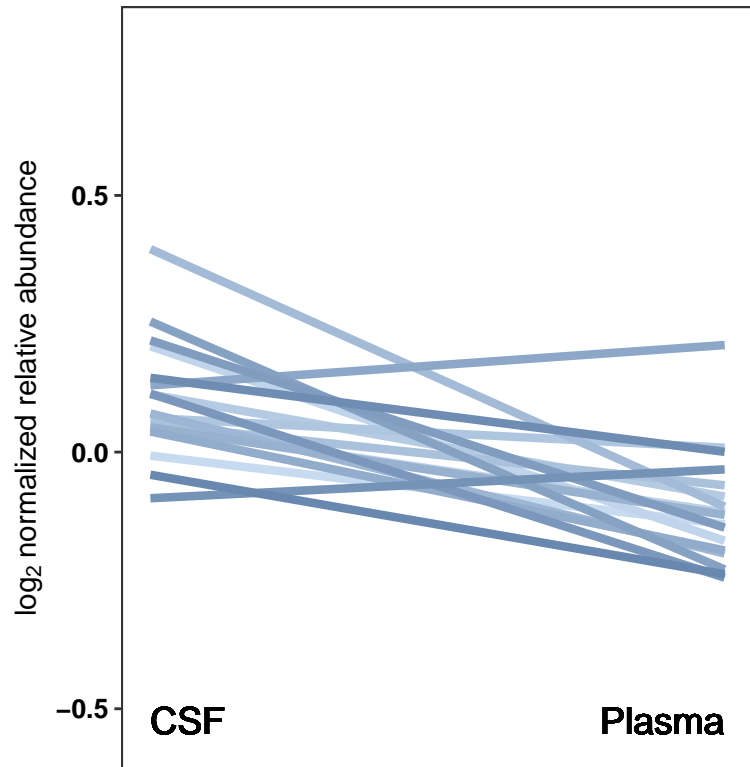

# M24 darkgrey: Ubiquitination

slopeDiff(AD-CT): -0.398

Normal:

AD:

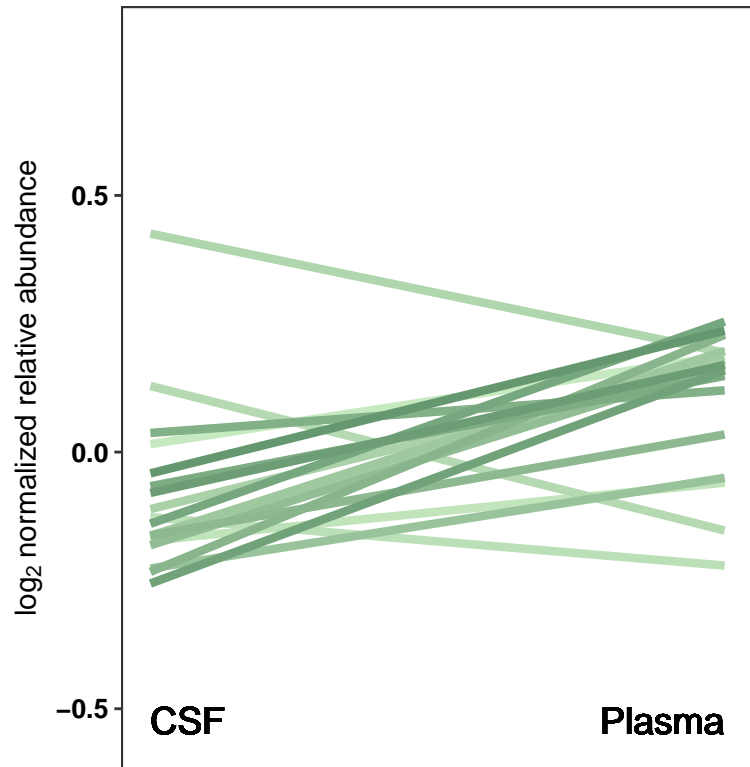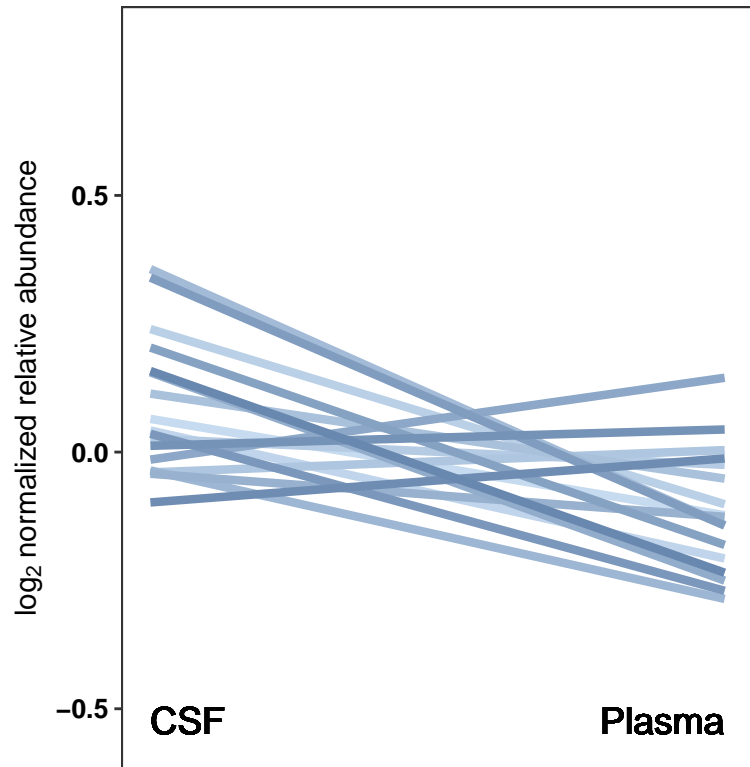

# M7 black: SNAP Receptor/SNARE Complex

slopeDiff(AD-CT): -0.362

Normal:

AD:

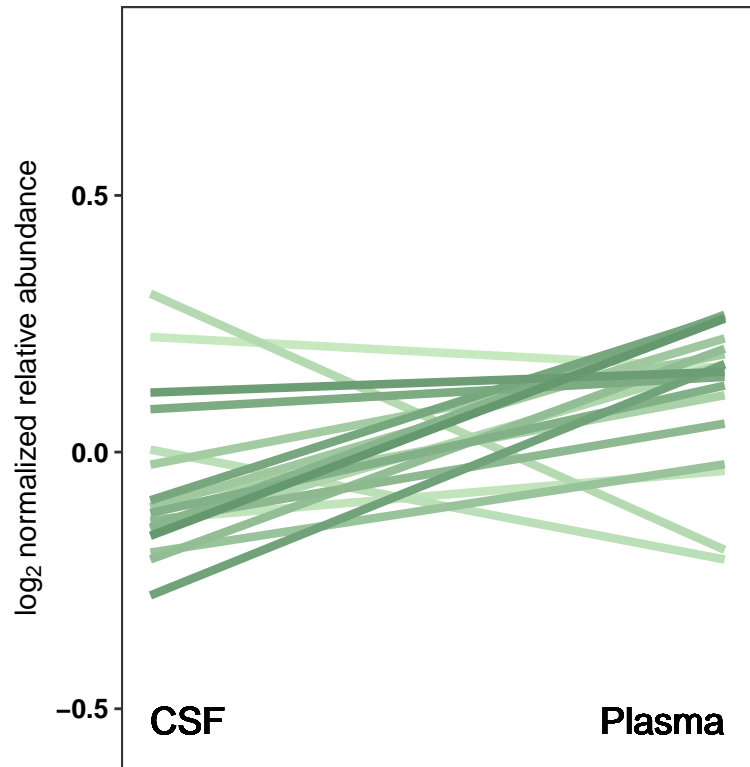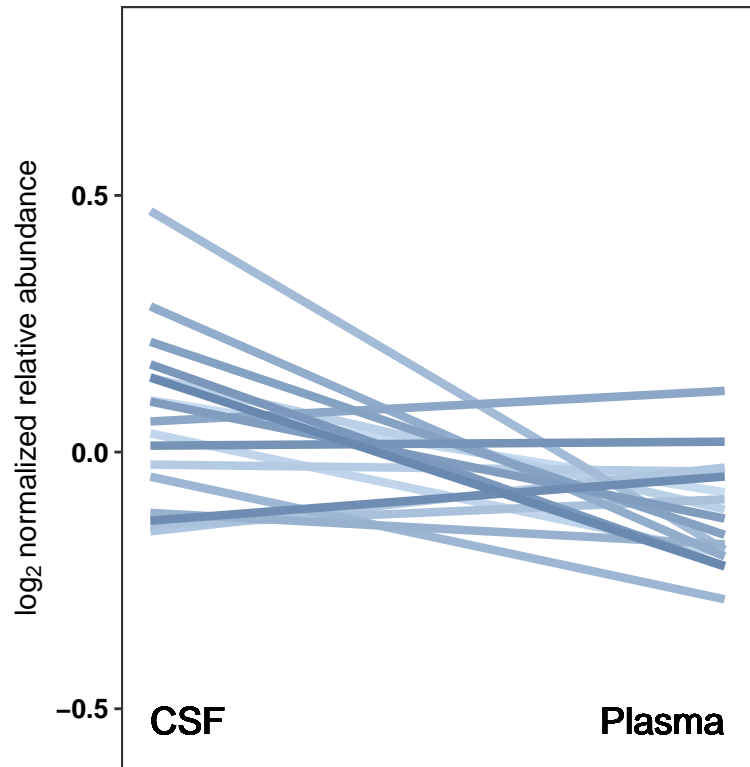

# M16 lightcyan: Sugar Metabolism

slopeDiff(AD-CT): -0.358

Normal:

AD:

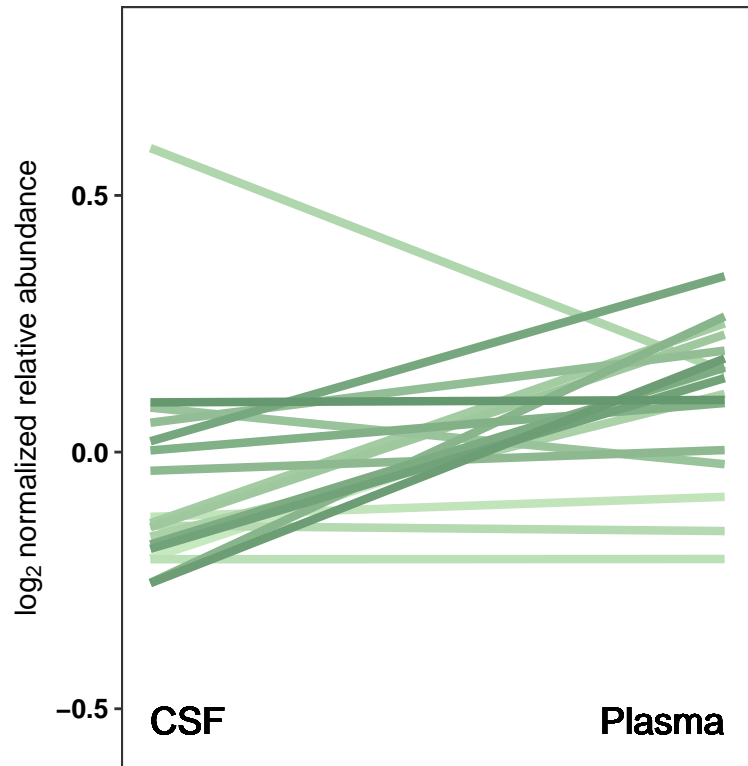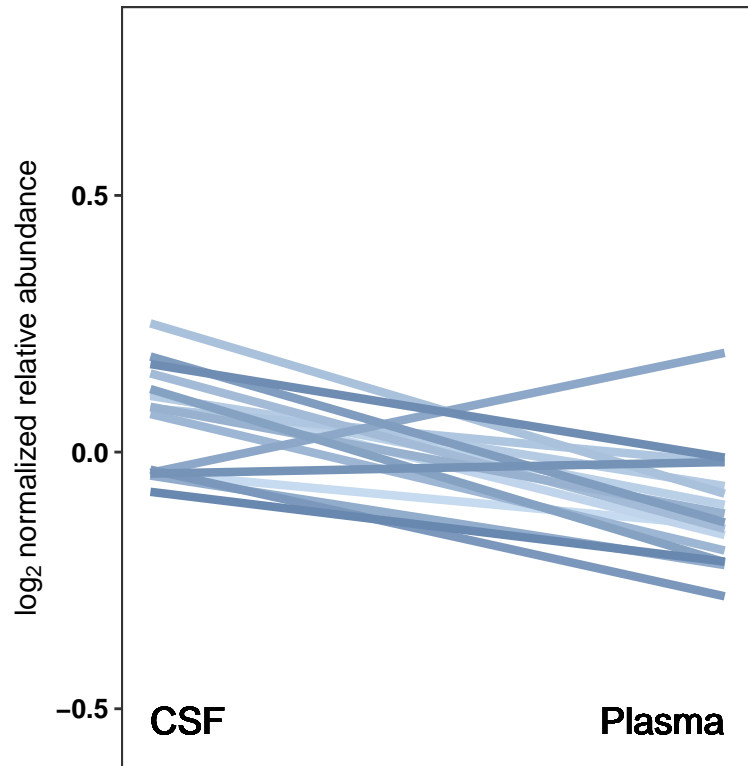

# M6 red: Muscle/Neurotransmitter Transport

slopeDiff(AD-CT): -0.331

Normal:

AD:

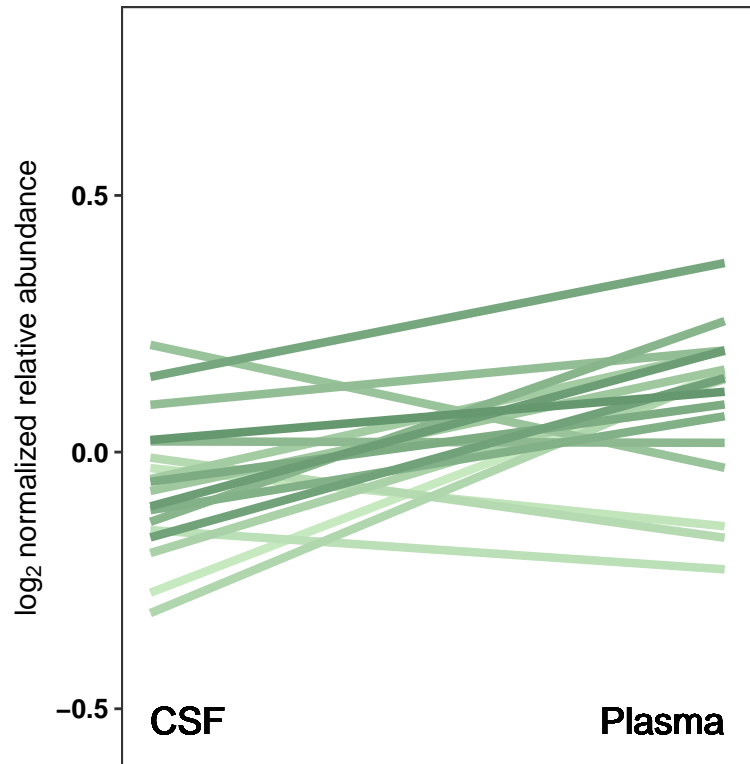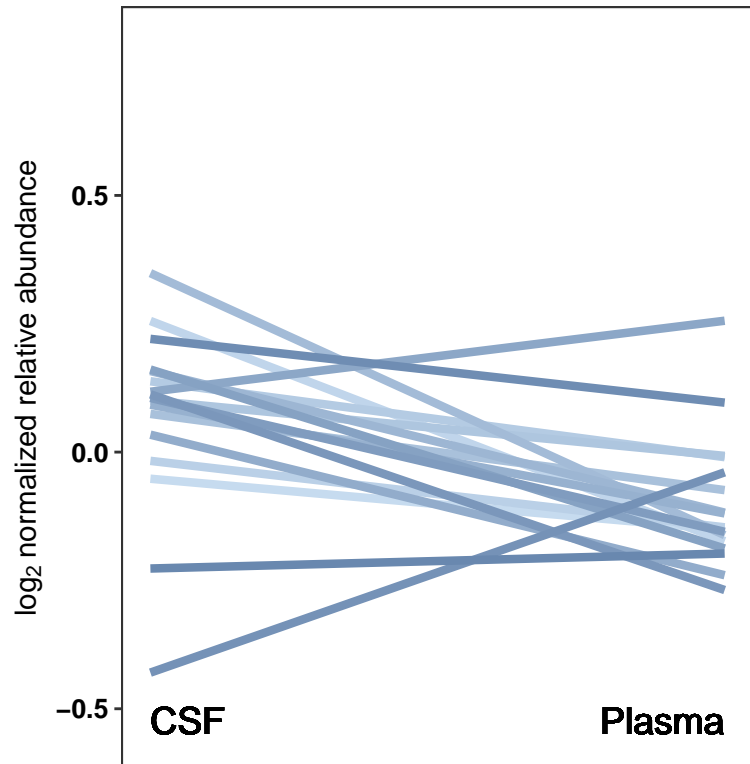

# M35 sienna3: Ambiguous

slopeDiff(AD-CT): -0.329

Normal:

AD:

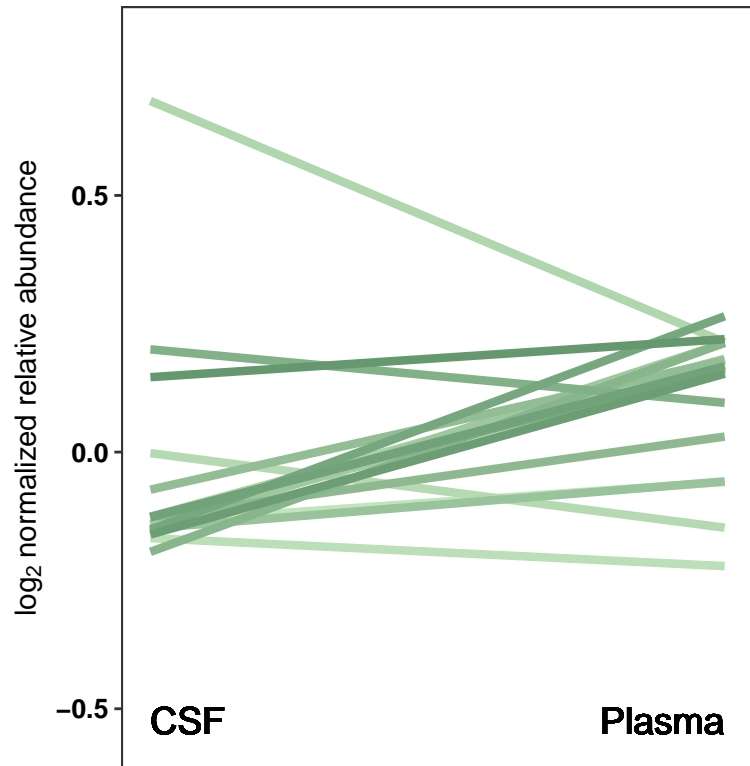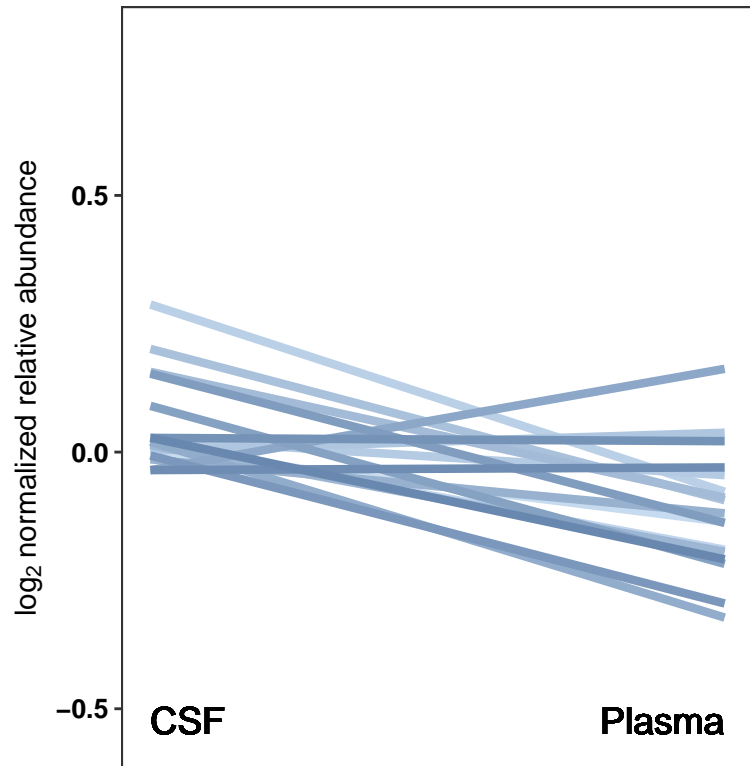



# M32 violet: Synaptic Membrane/Matrisome

slopeDiff(AD-CT): -0.302

Normal:

AD:

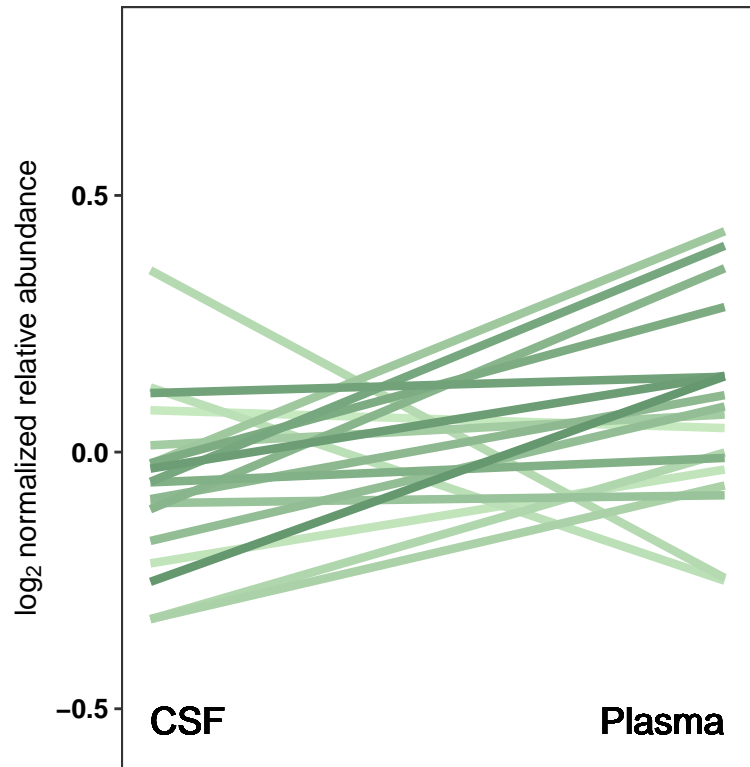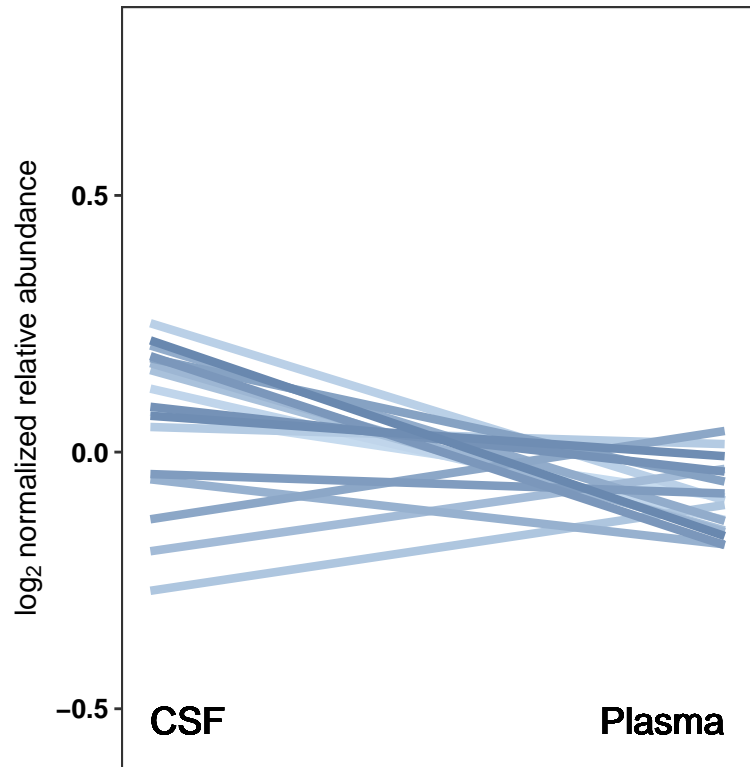

# M3 brown: Complement/Protein Activation Cascade

slopeDiff(AD-CT): 0.276

Normal:

AD:

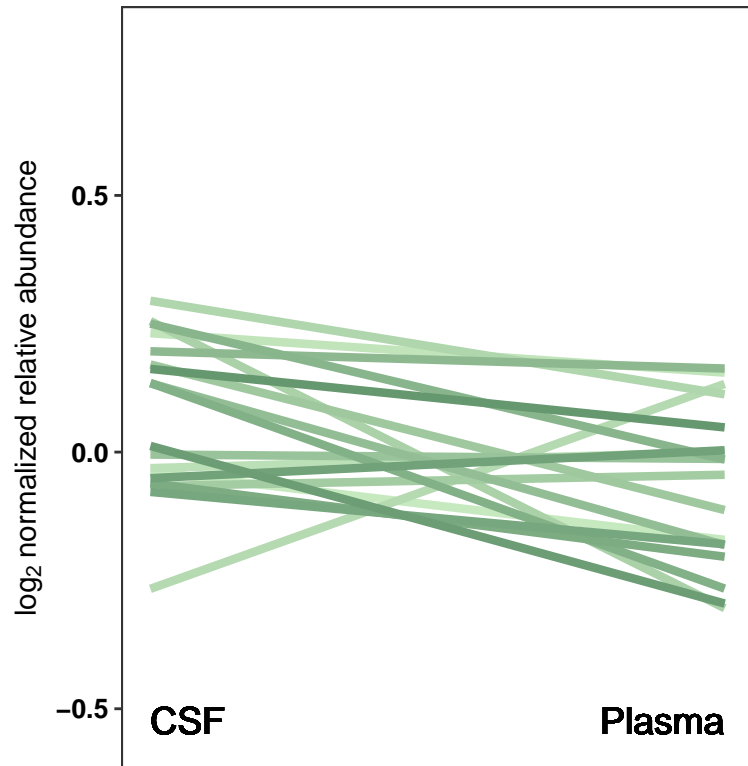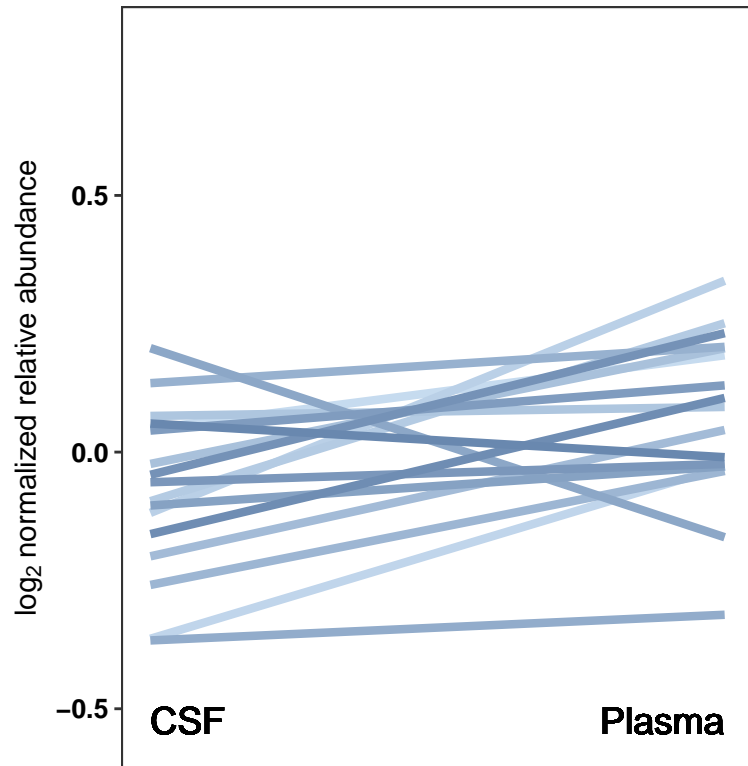

# M14 cyan: Golgi/Glycosylation

slopeDiff(AD-CT): 0.272

Normal:

AD:

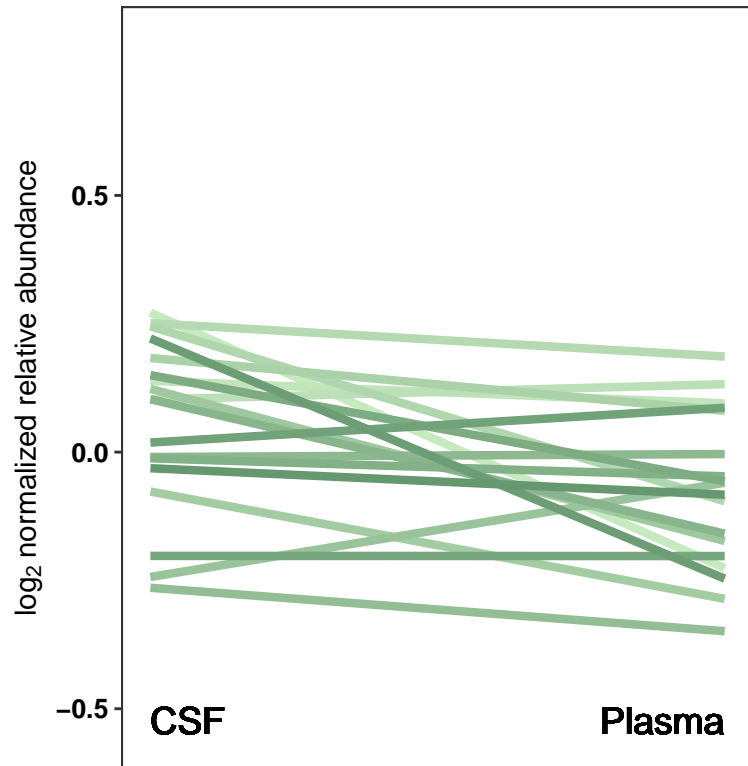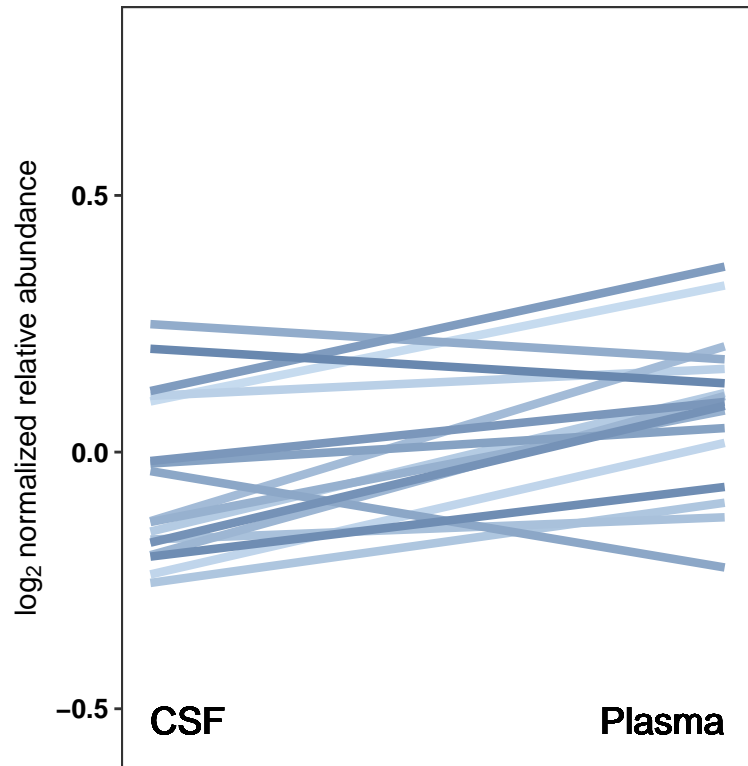

# M36 yellowgreen: Organelle Organization/Biogenesis

slopeDiff(AD-CT): -0.271

Normal:

AD:

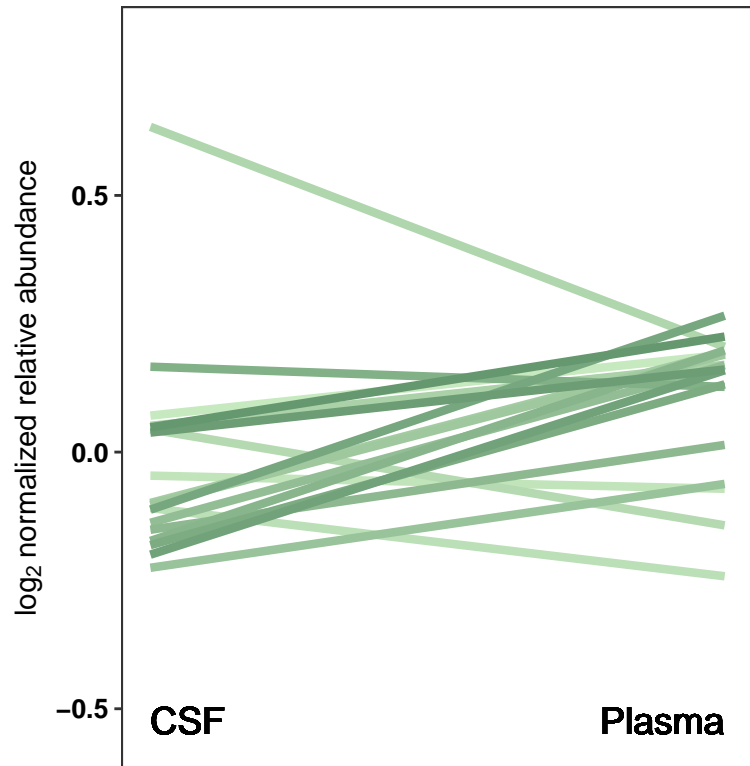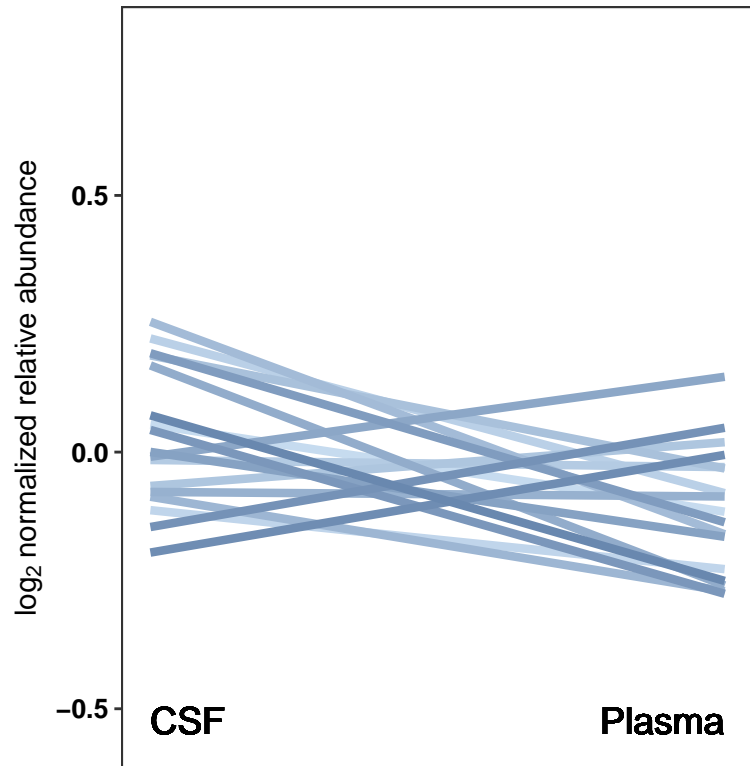

# M26 darkorange: TGF-? Signaling

slopeDiff(AD-CT): 0.236

Normal:

AD:

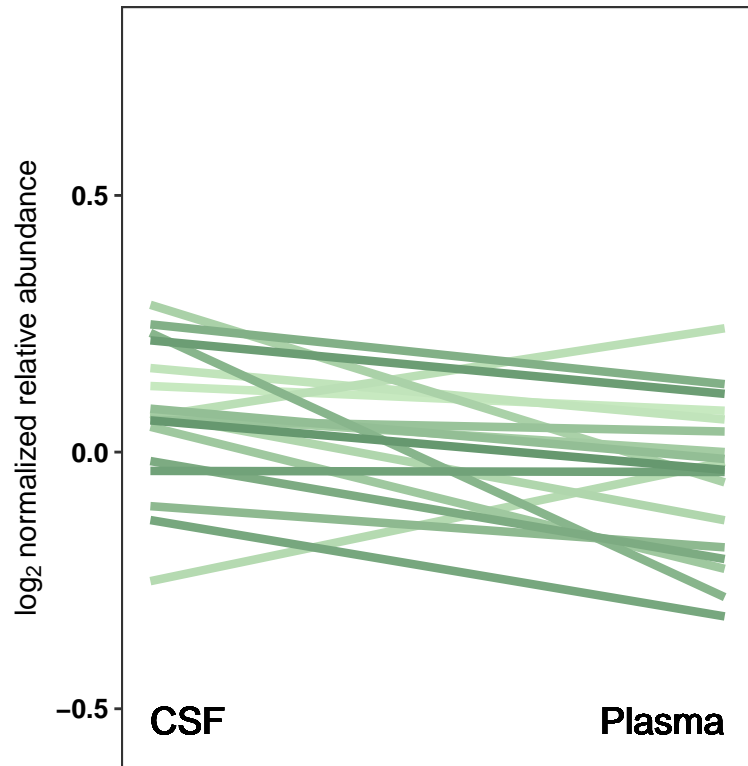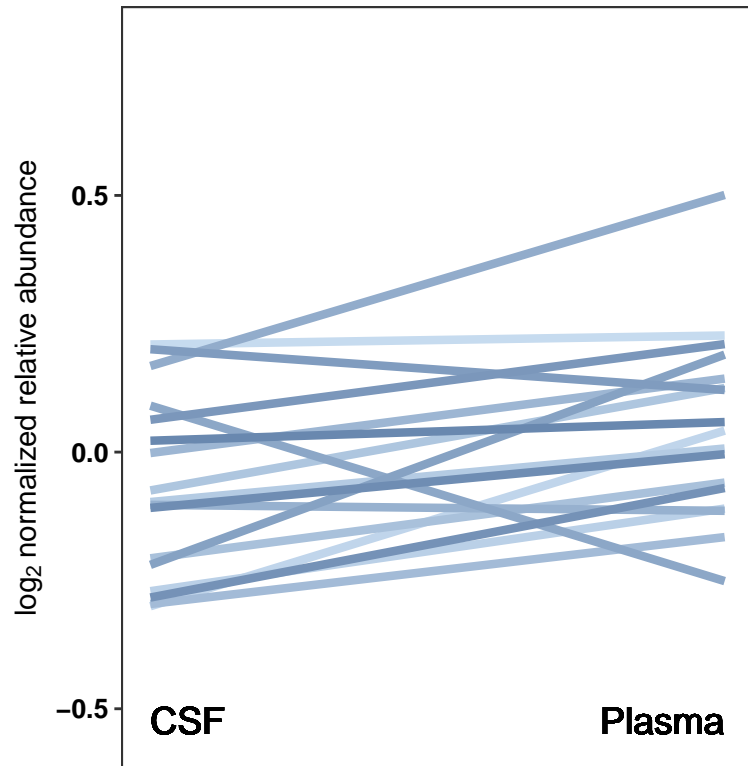

# M13 salmon: Semaphorin–Plexin/Axon Guidance

slopeDiff(AD–CT): 0.227

Normal:

AD:

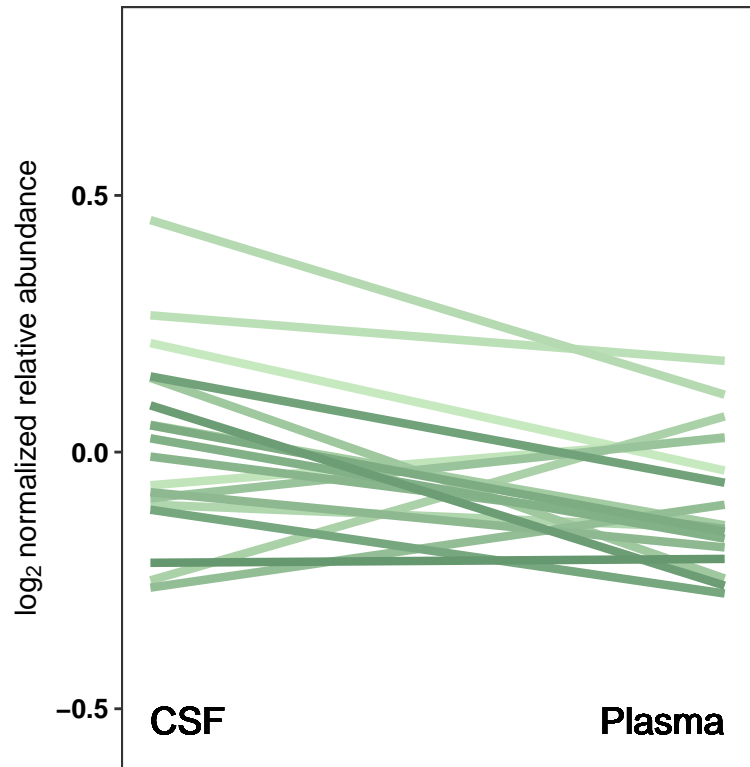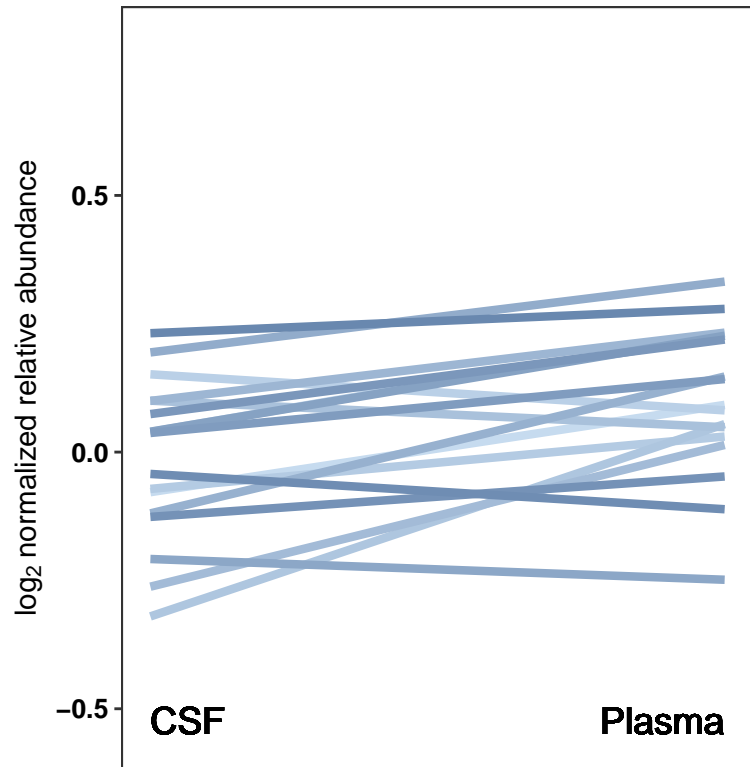

# M38 plum1: Ambiguous

slopeDiff(AD-CT): 0.223

Normal:

AD:

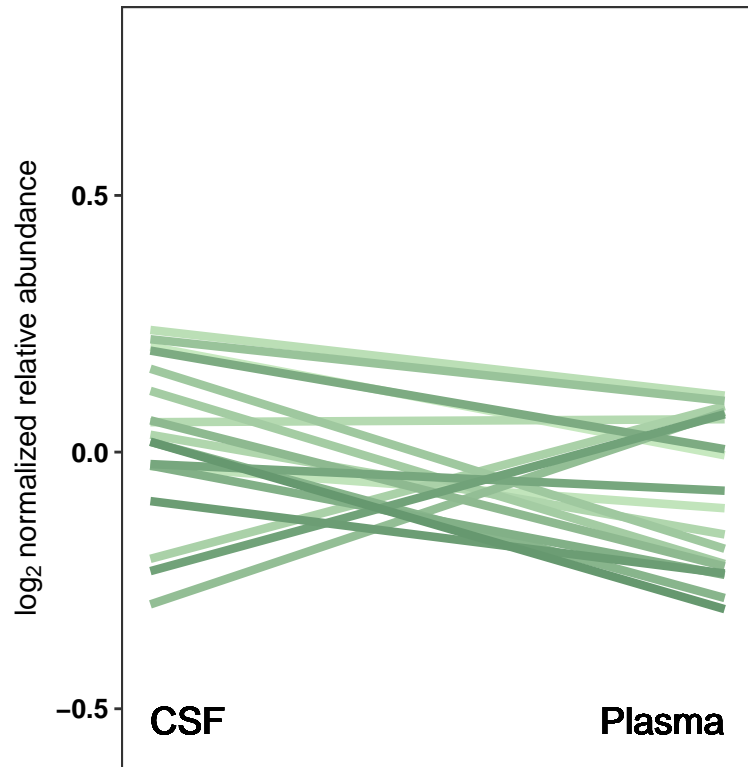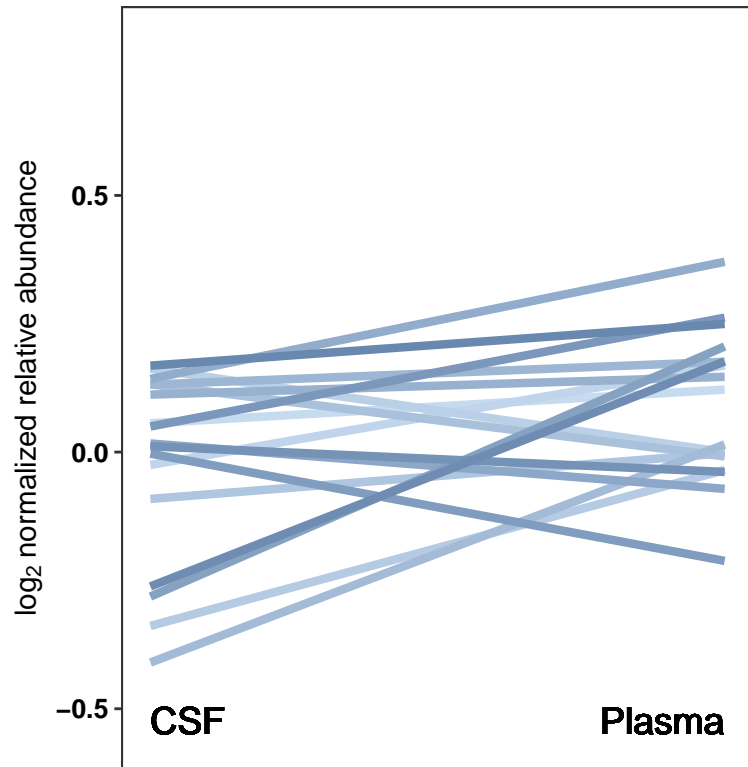

# M2 blue: Neuronal/Axon Development

slopeDiff(AD-CT): 0.218

Normal:

AD:

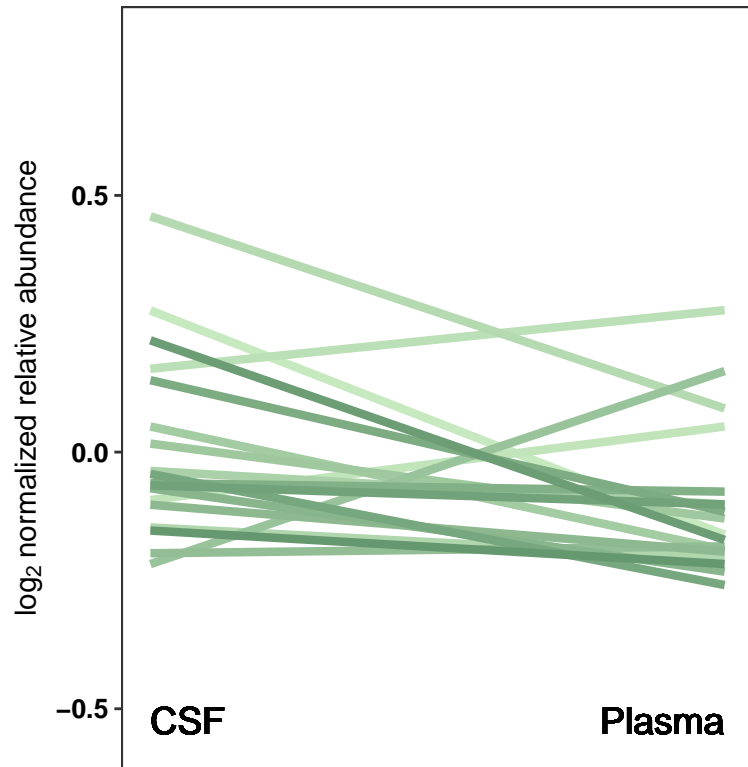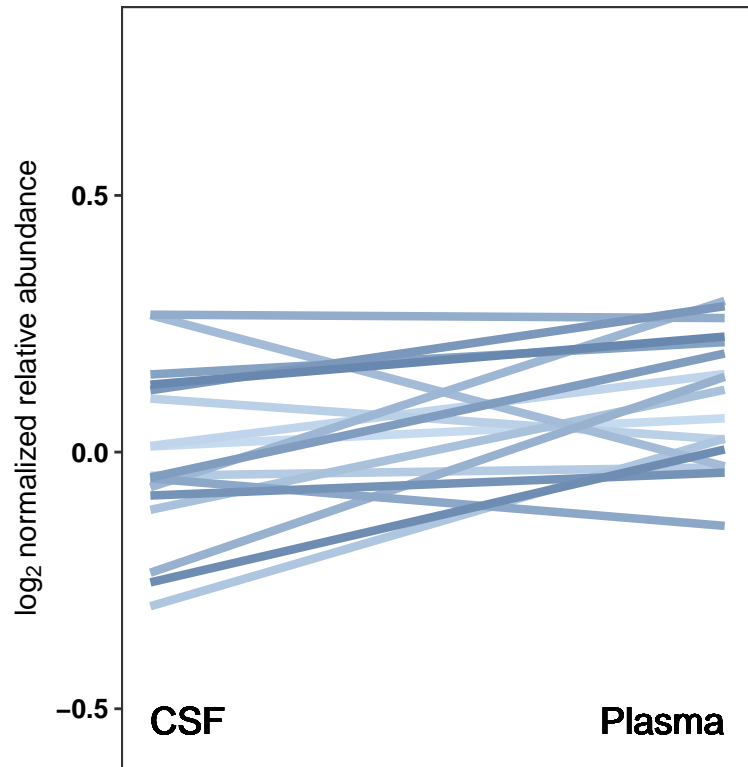



# M1 turquoise: Immune Response

slopeDiff(AD-CT): -0.198

Normal:

AD:

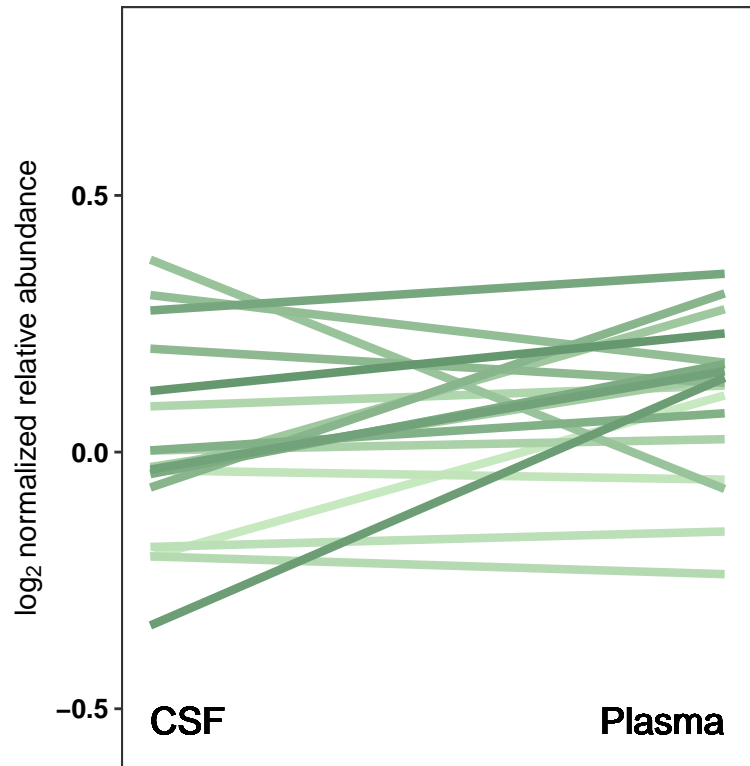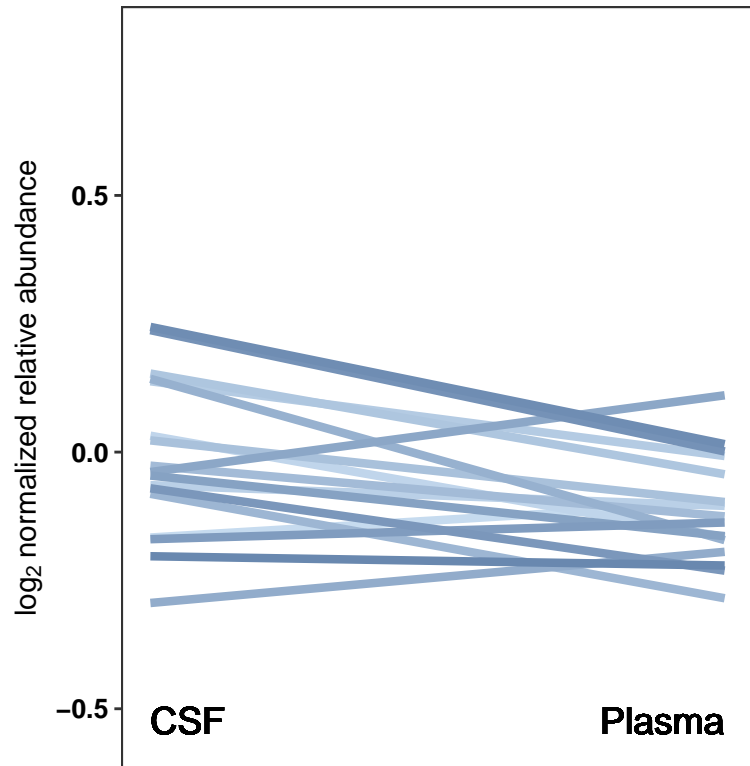

# M18 lightgreen: ECM Organization/Scavenger Receptor

slopeDiff(AD-CT): 0.195

Normal:

AD:

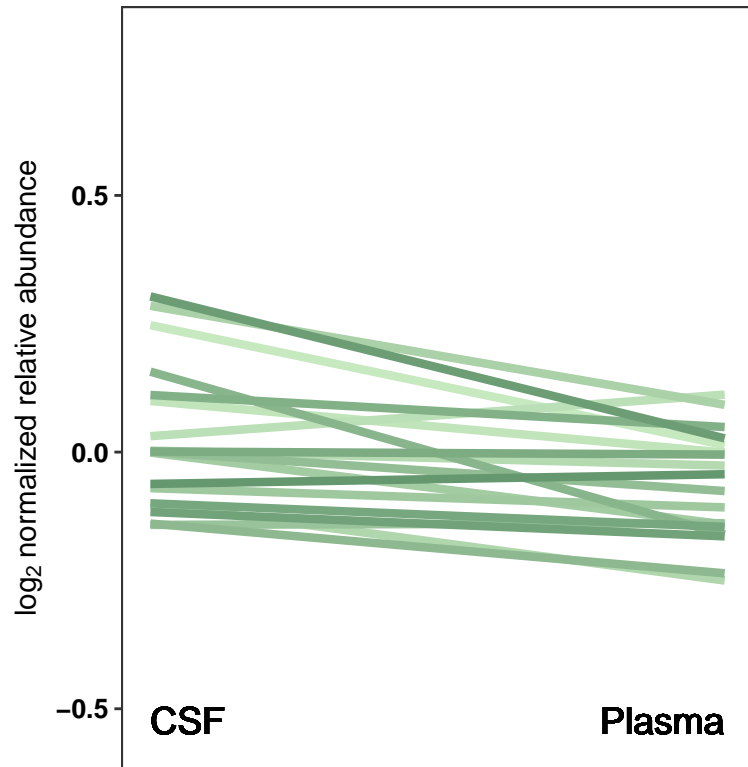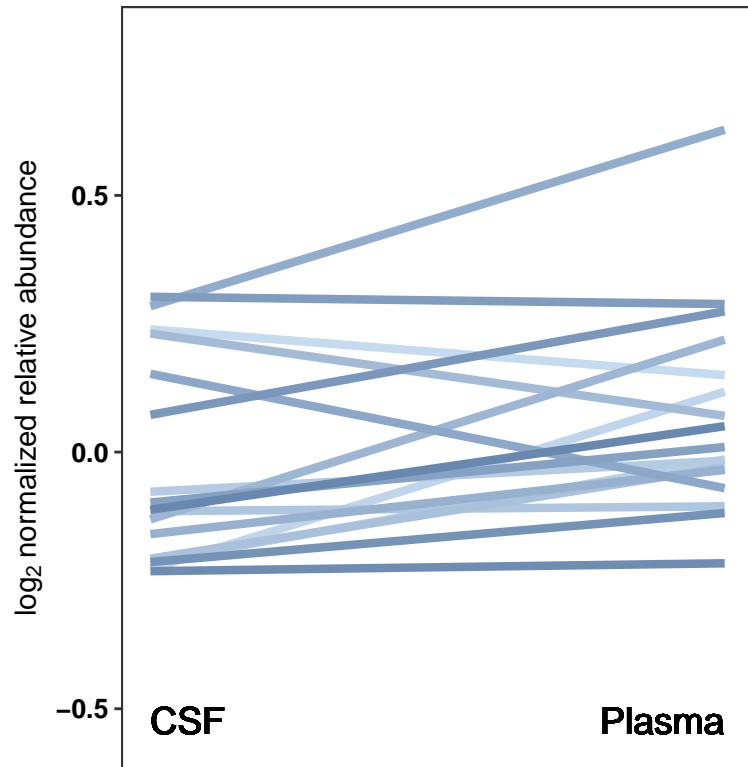

# M33 darkolivegreen: Translation/Sugar Binding

slopeDiff(AD-CT): -0.187

Normal:

AD:

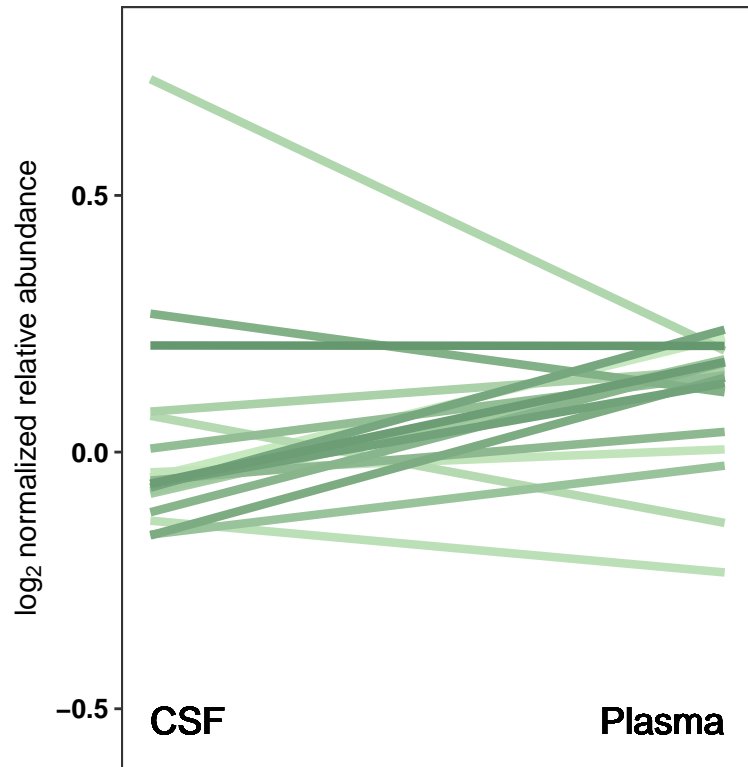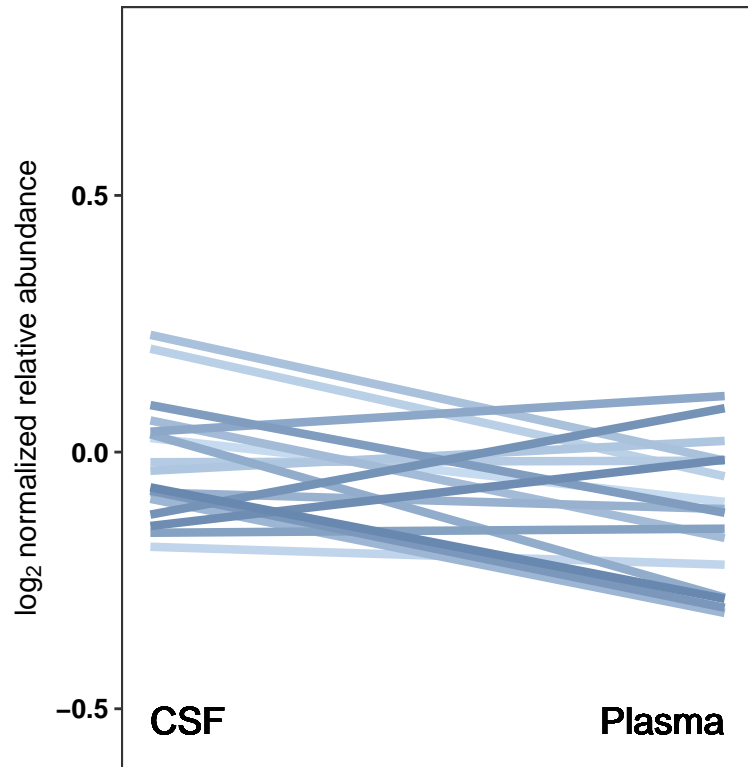

# M27 white: Ambiguous

slopeDiff(AD-CT): 0.187

Normal:

AD:

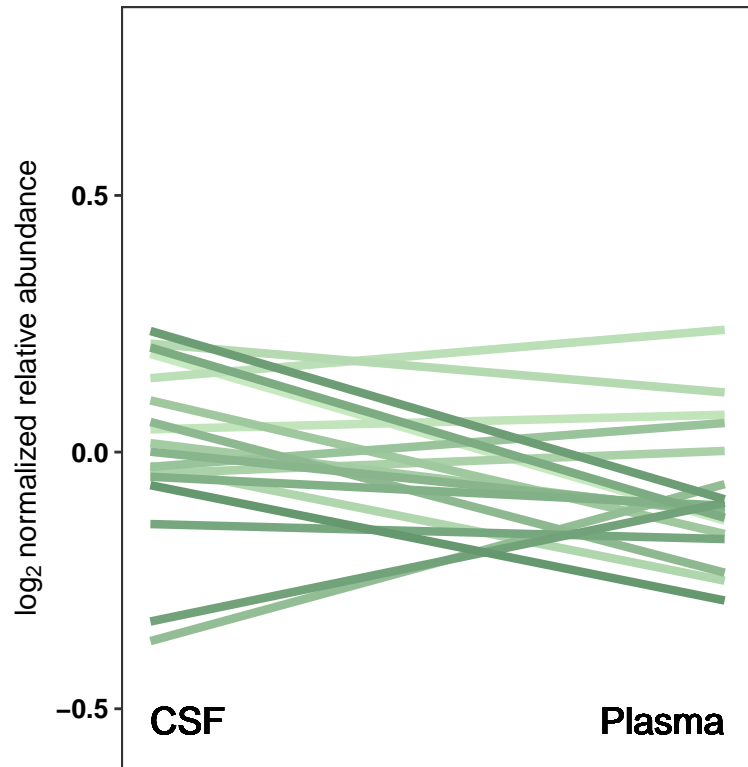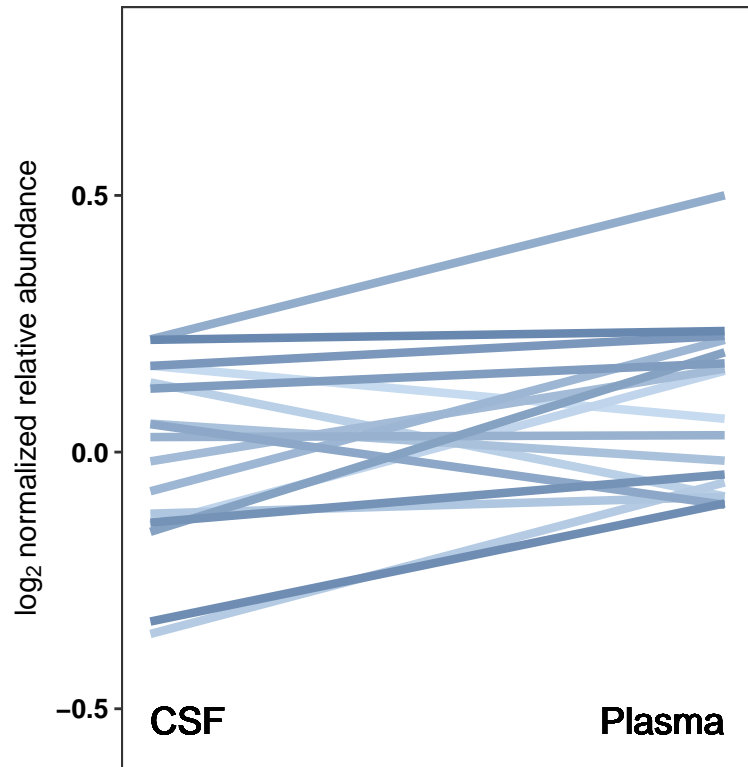

# M11 greenyellow: Ambiguous

slopeDiff(AD-CT): 0.177

Normal:

AD:

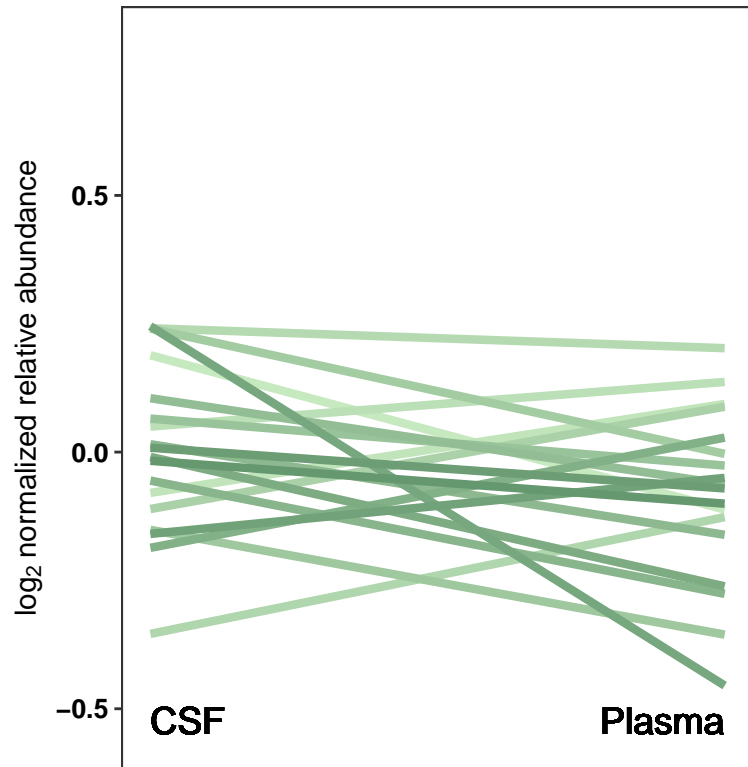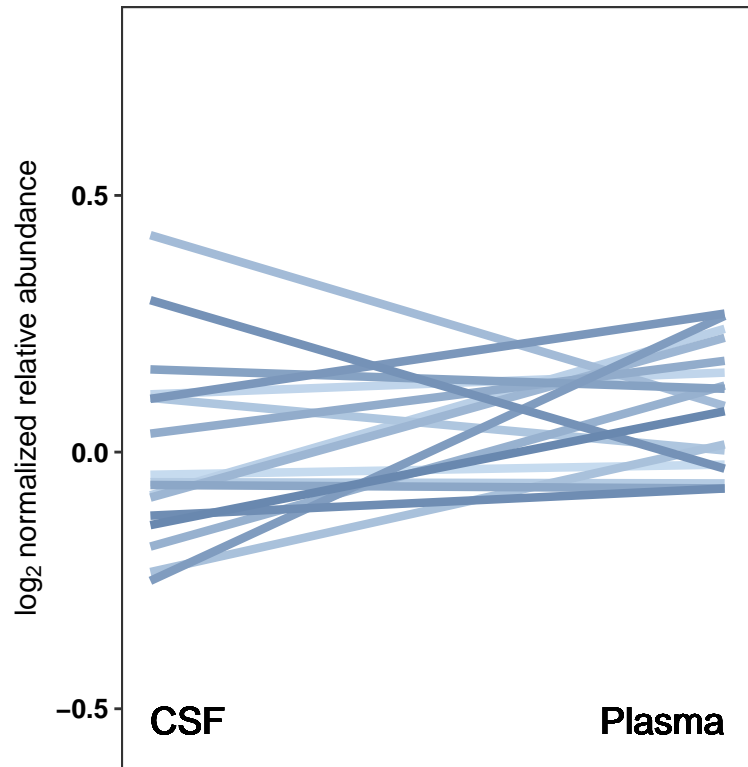

# M5 green: Compound Metabolism/Heat Shock Protein Binding

slopeDiff(AD-CT): -0.169

Normal:

AD:

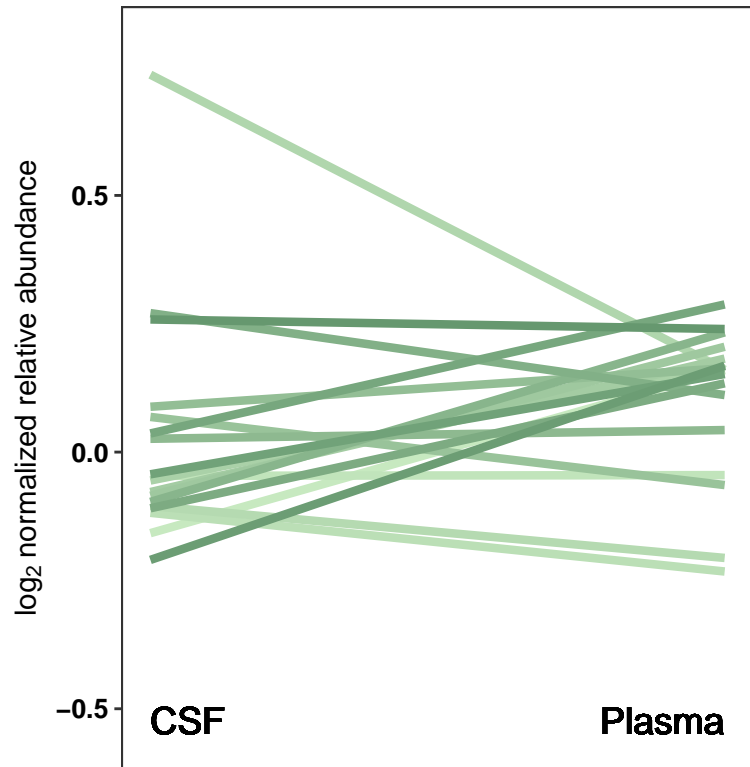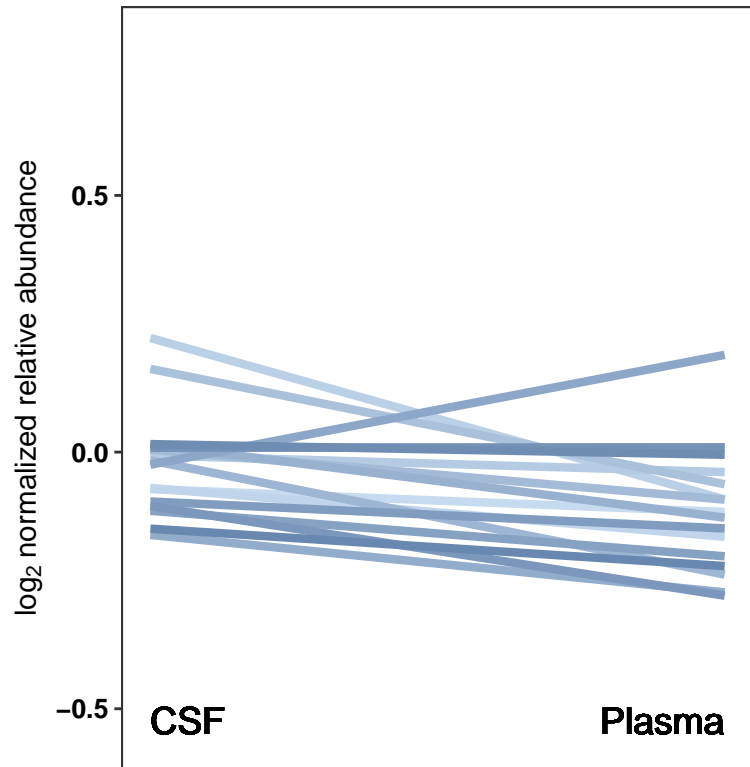

# M25 orange: Ambiguous

slopeDiff(AD-CT): -0.167

Normal:

AD:

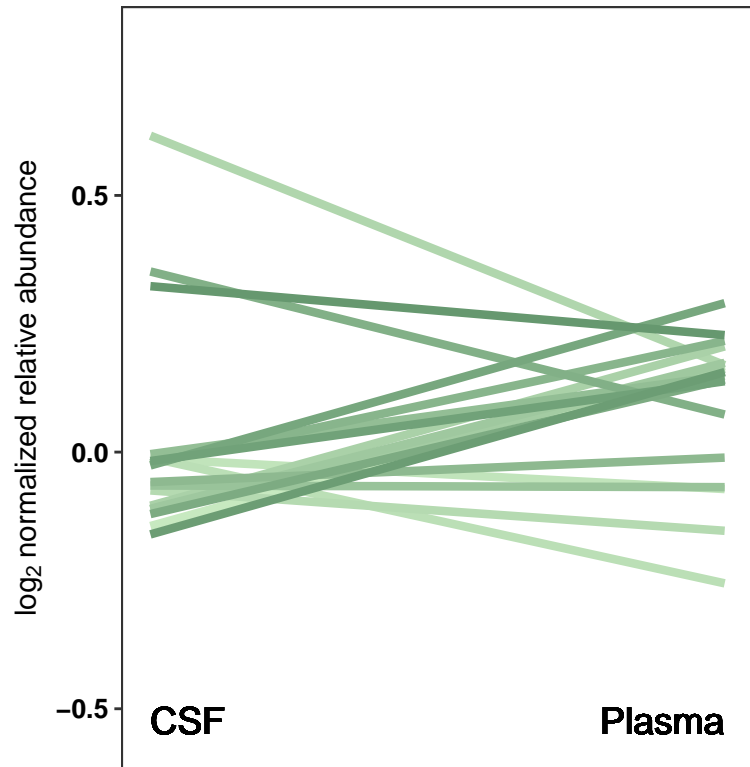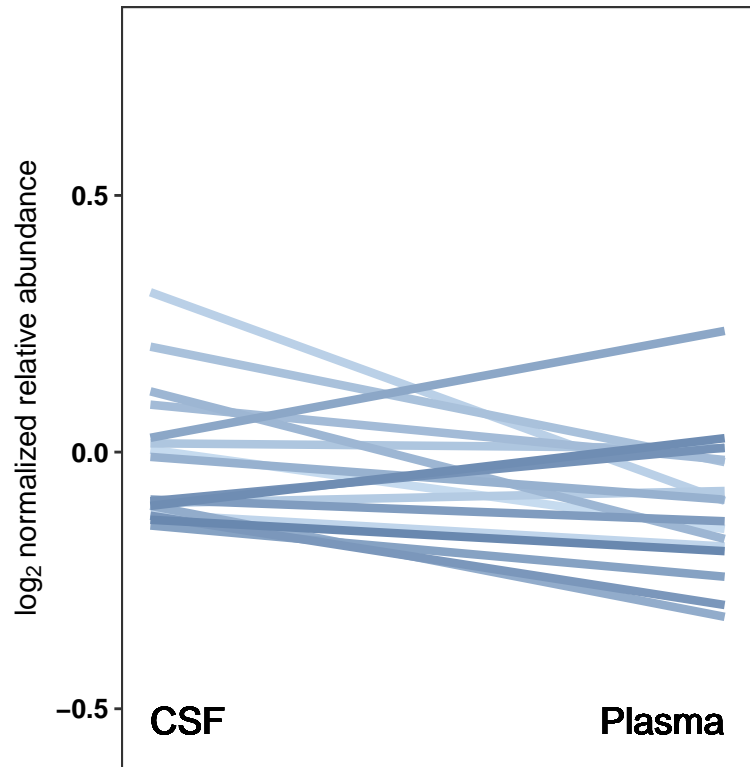

# M12 tan: Neurexin/Neuronal Adhesion

slopeDiff(AD-CT): -0.152

Normal:

AD:

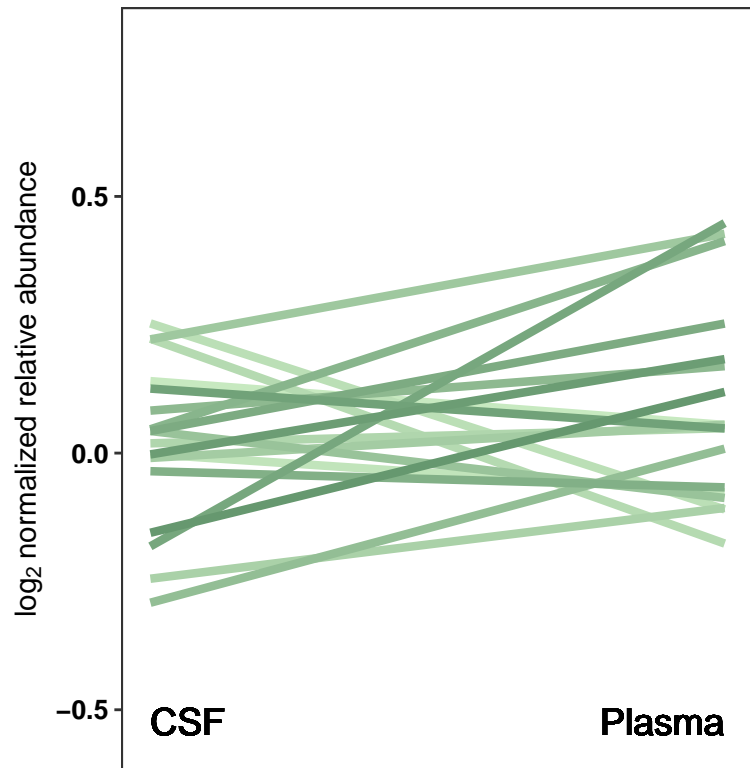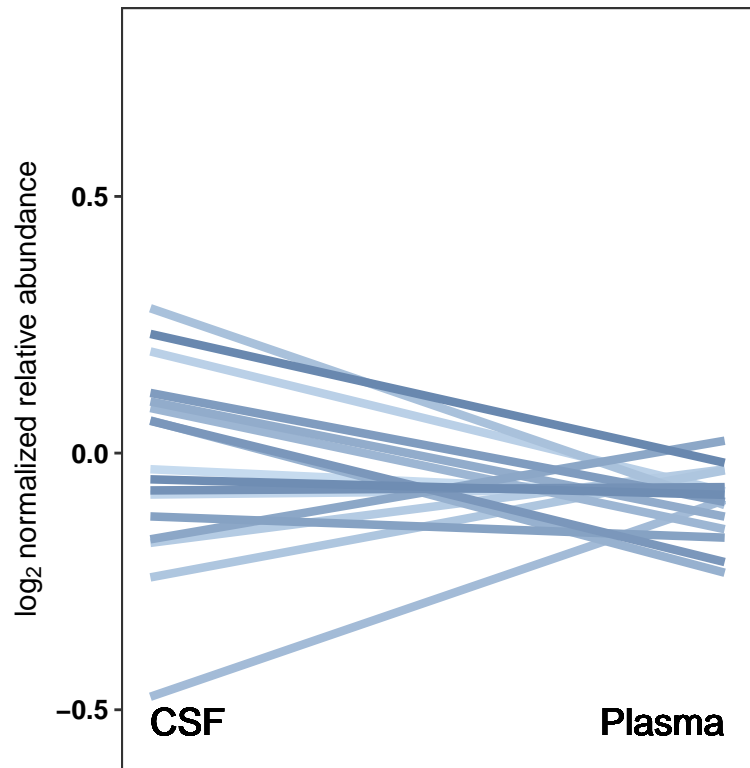



# M4 yellow: Lysosome

slopeDiff(AD-CT): -0.149

Normal:

AD:

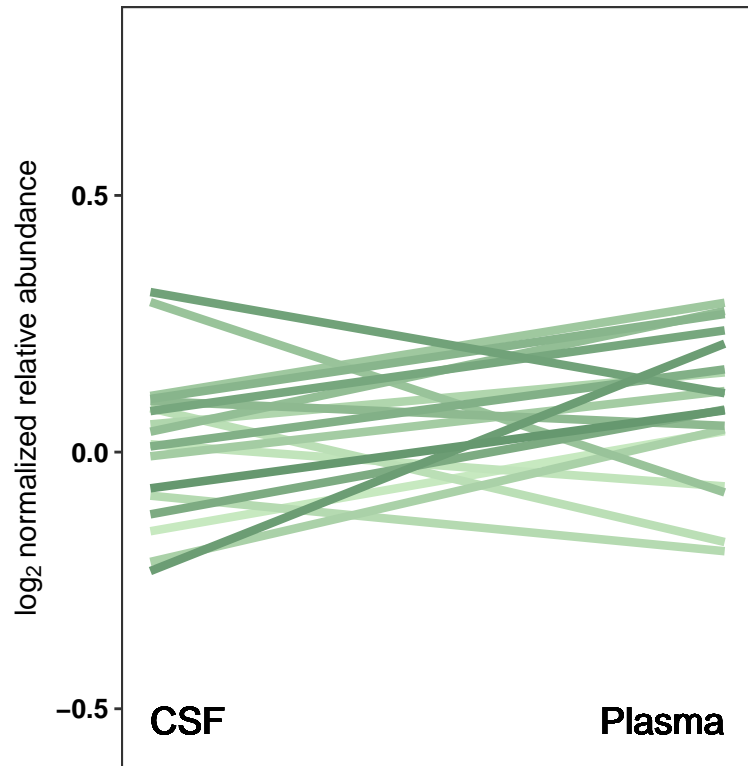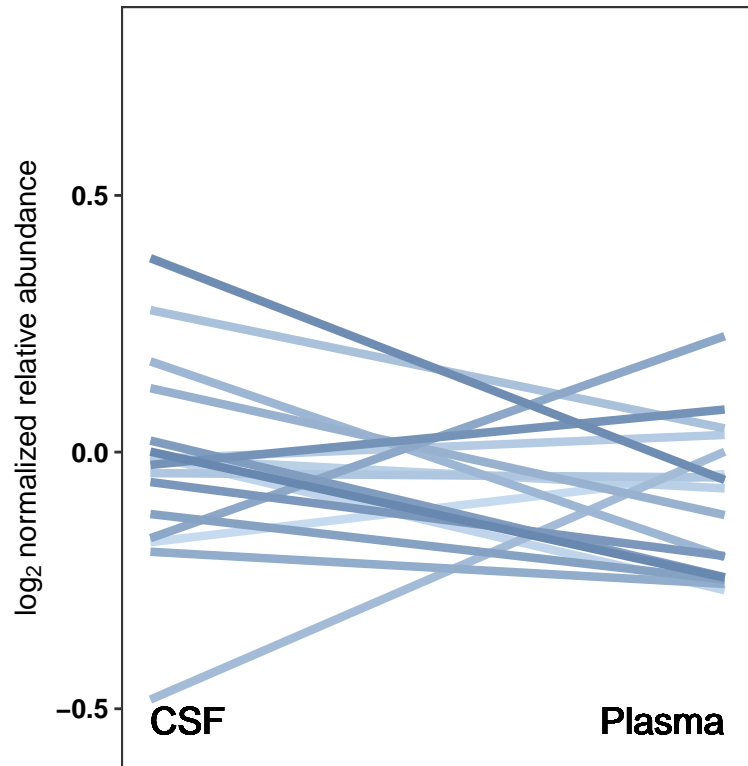

# M37 skyblue3: RNA Binding/Metabolism

slopeDiff(AD-CT): -0.137

Normal:

AD:

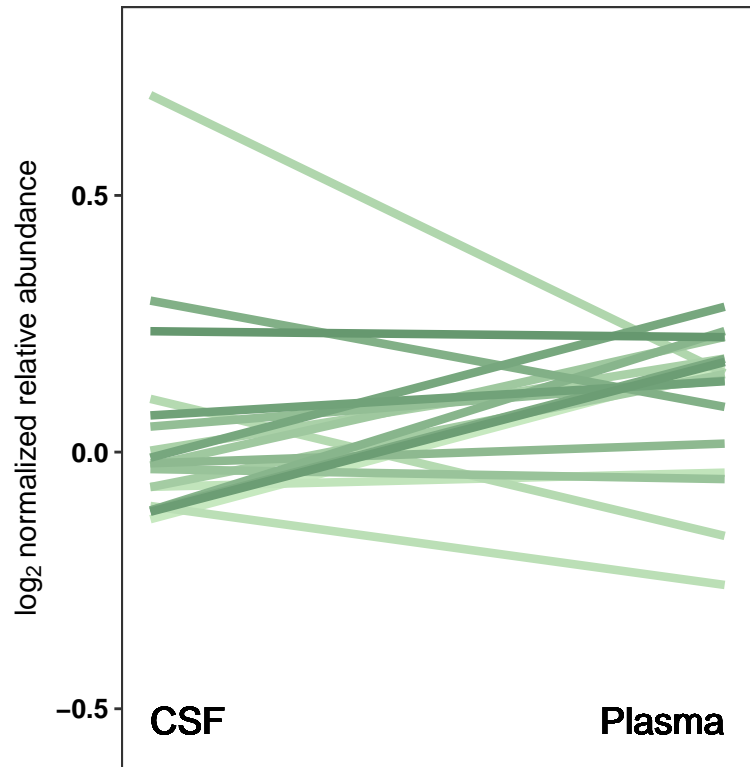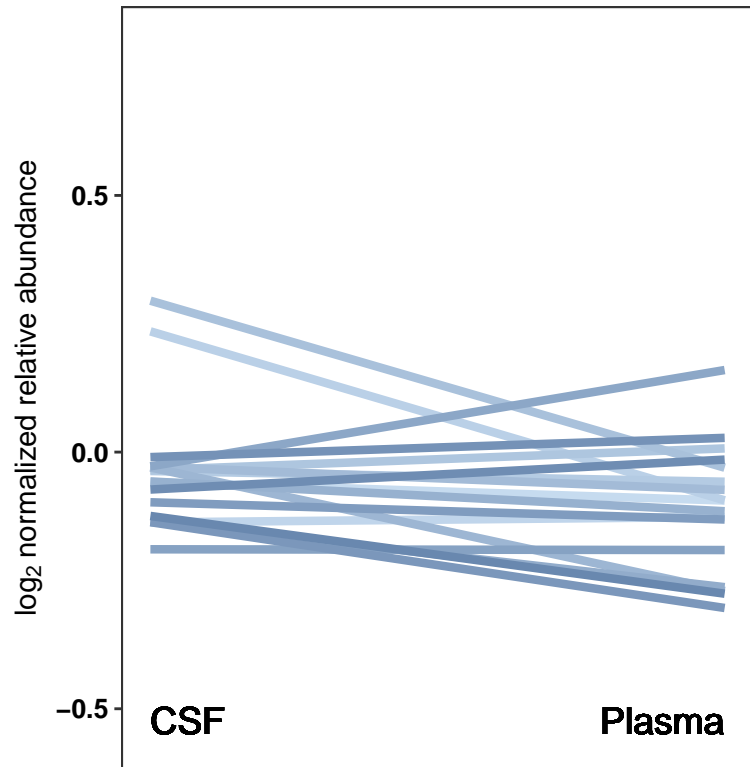

# M21 darkred: Neuron Recognition

slopeDiff(AD-CT): 0.131

Normal:

AD:

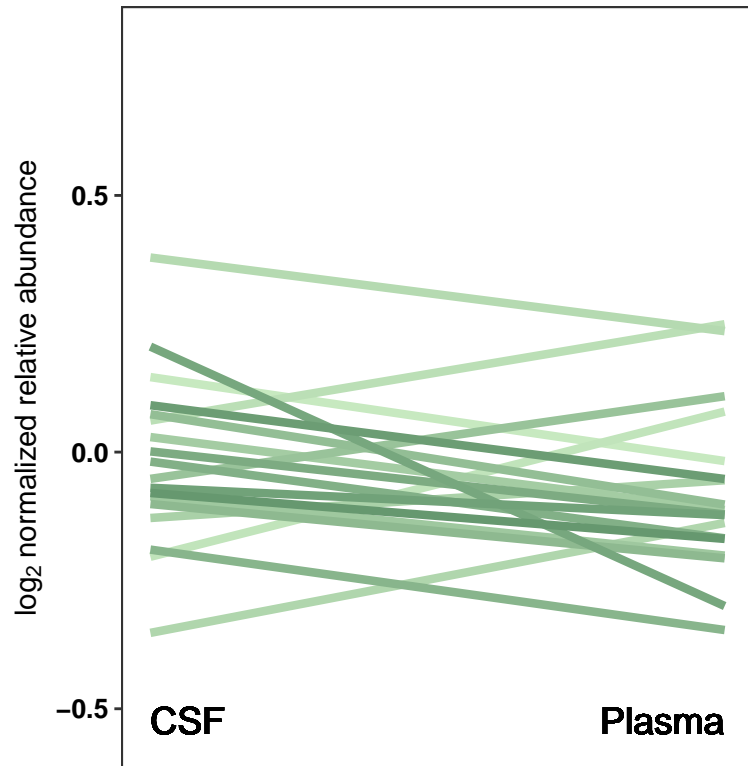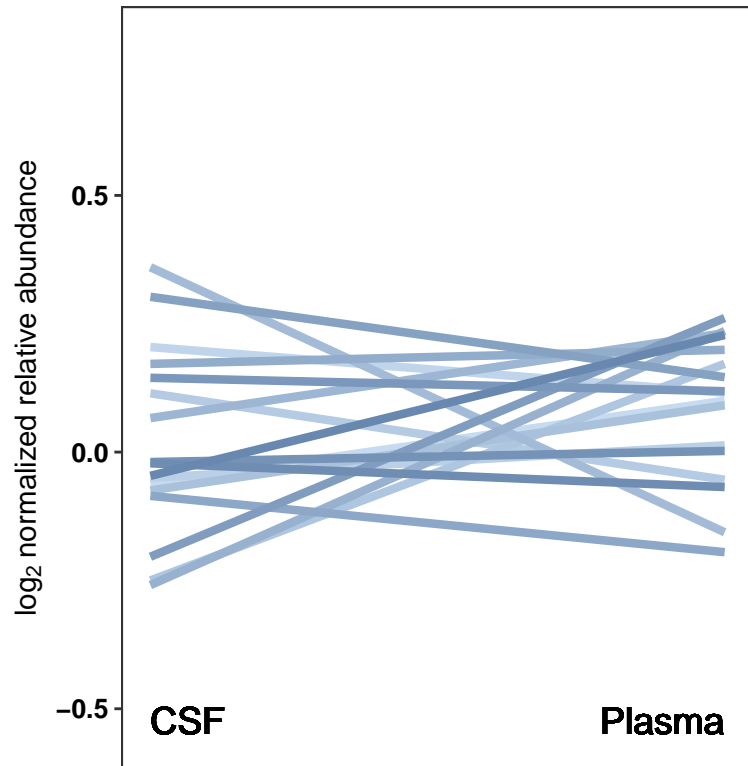

# M28 skyblue: Proteasome

slopeDiff(AD-CT): -0.123

Normal:

AD:

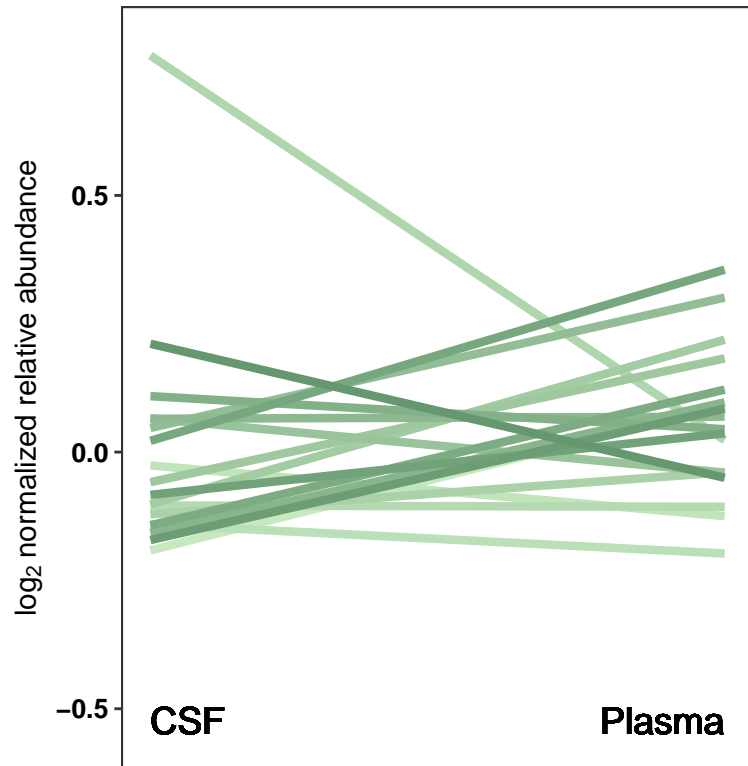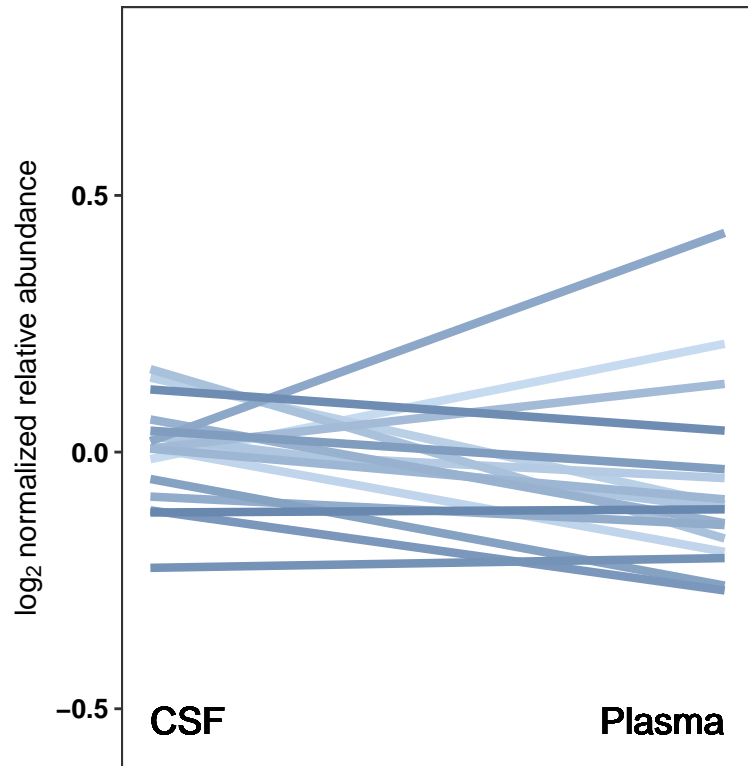

# M9 magenta: Ambiguous

slopeDiff(AD-CT): -0.119

Normal:

AD:

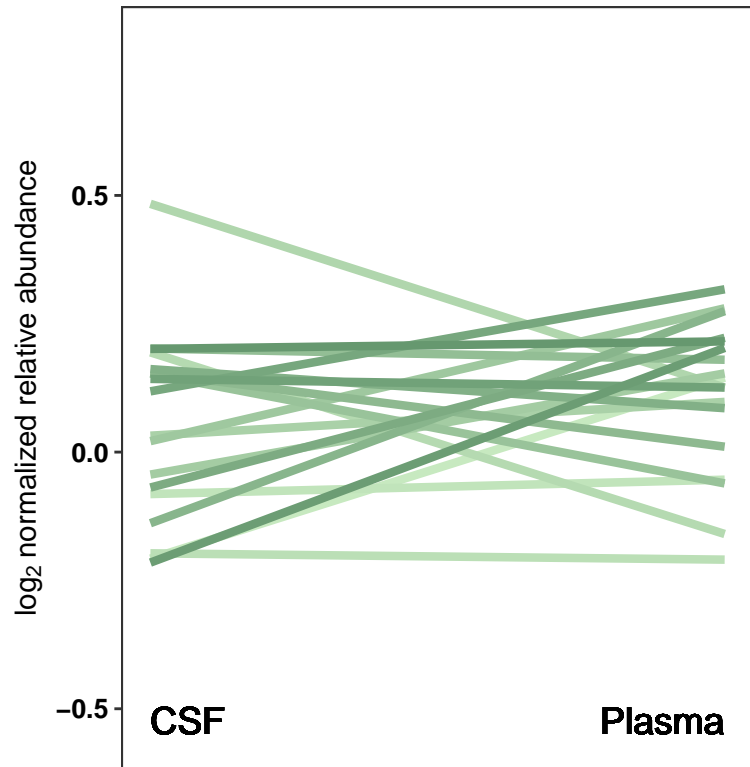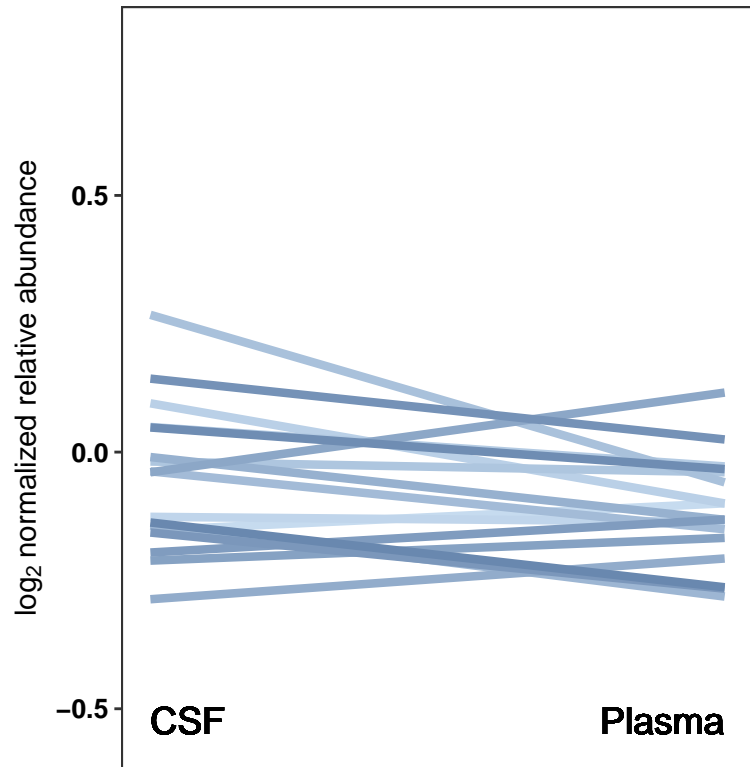

# M30 steelblue: Ribonucleoprotein Complex

slopeDiff(AD-CT): -0.113

Normal:

AD:

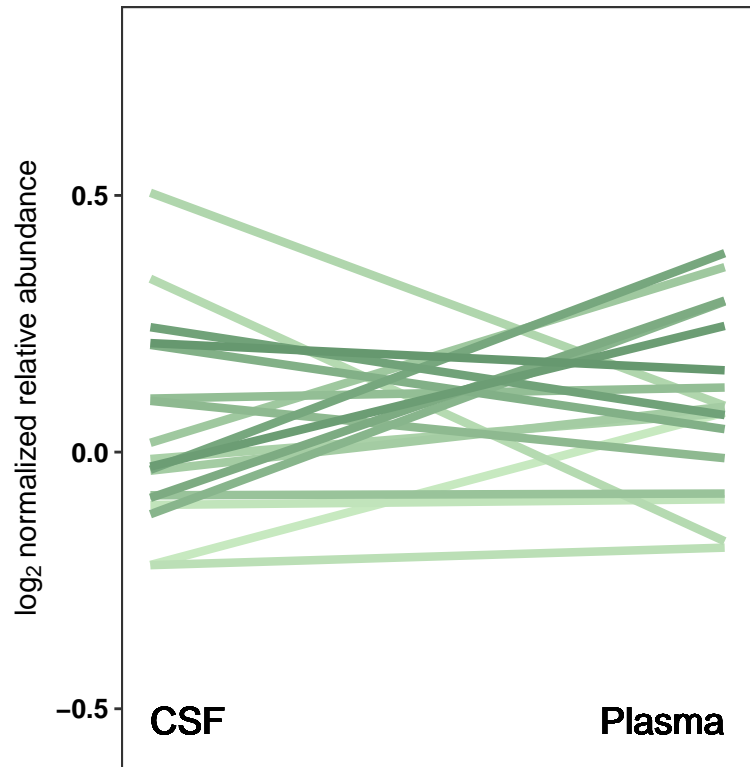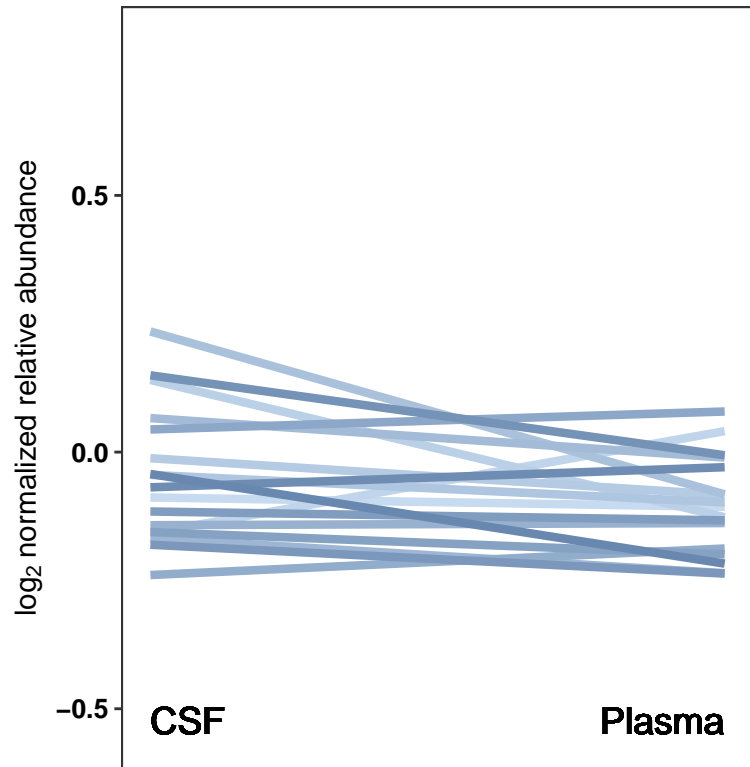

# M22 darkgreen: ECM/Actin Binding

slopeDiff(AD-CT): -0.0969

Normal:

AD:

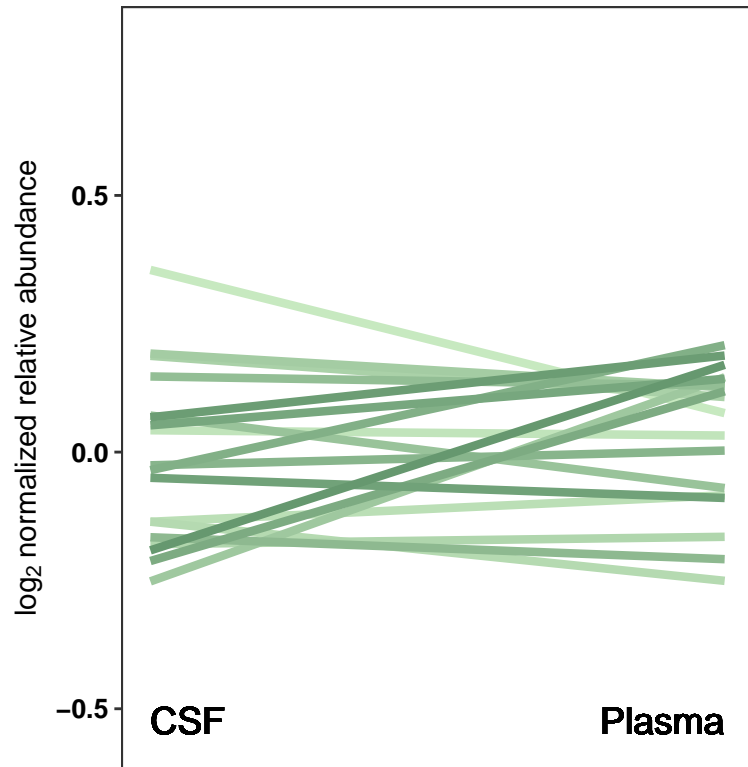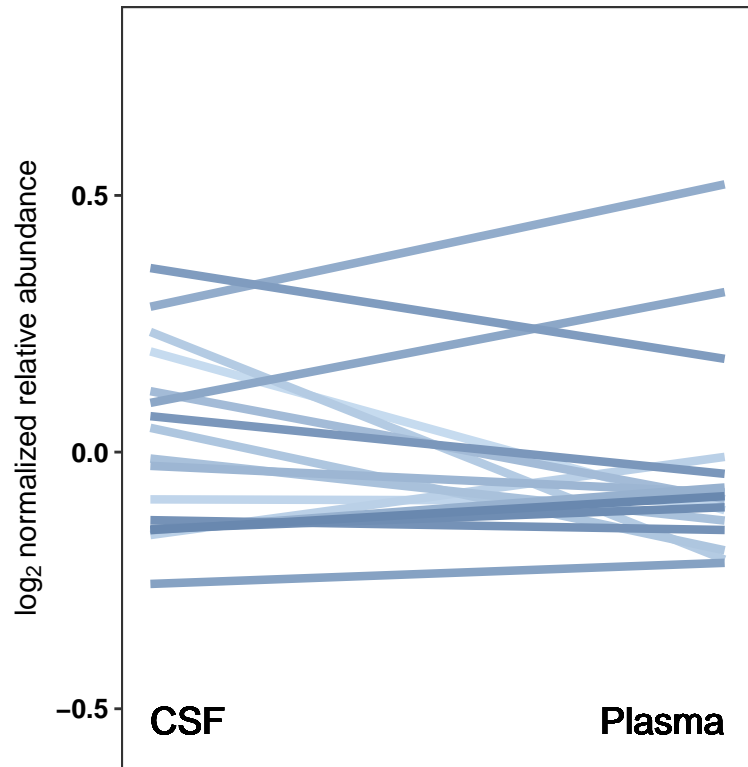

# M20 royalblue: Ambiguous

slopeDiff(AD-CT): -0.084

Normal:

AD:

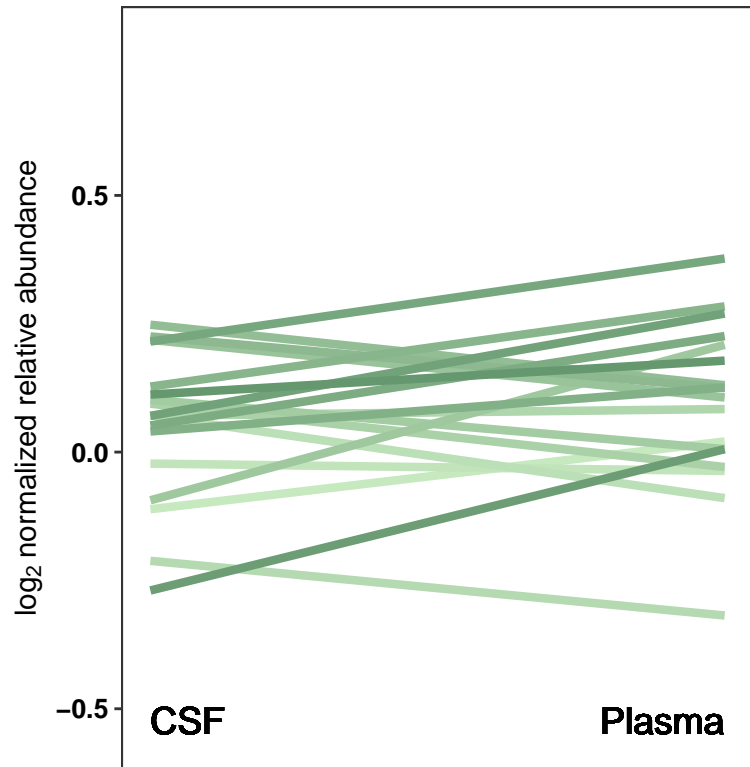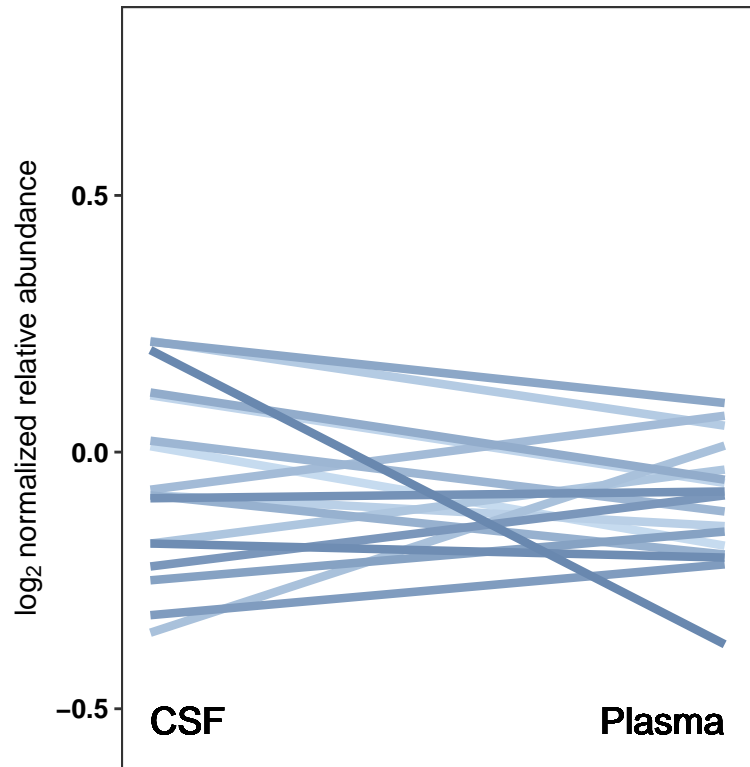



# M17 grey60: Ambiguous

slopeDiff(AD-CT): 0.0829

Normal:

AD:

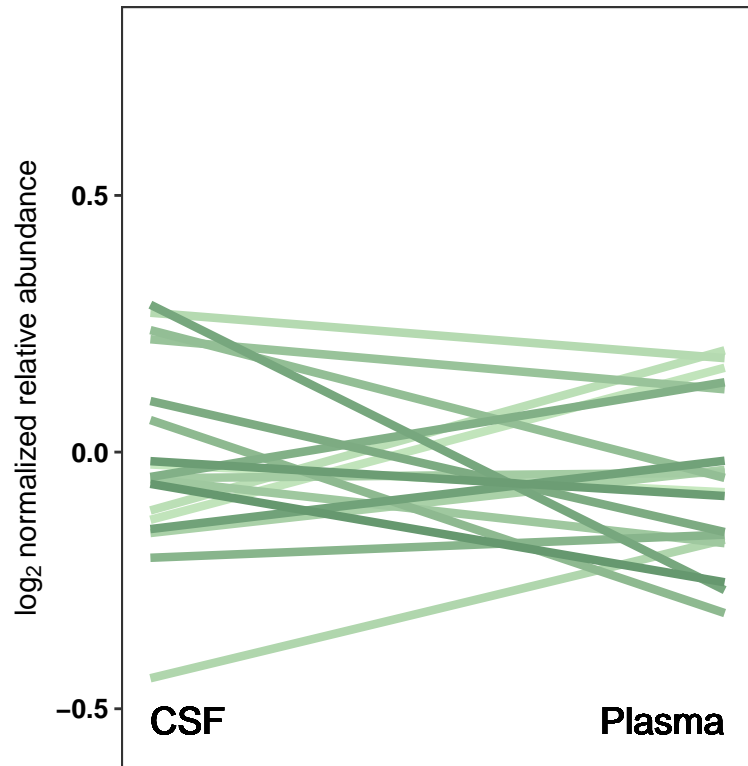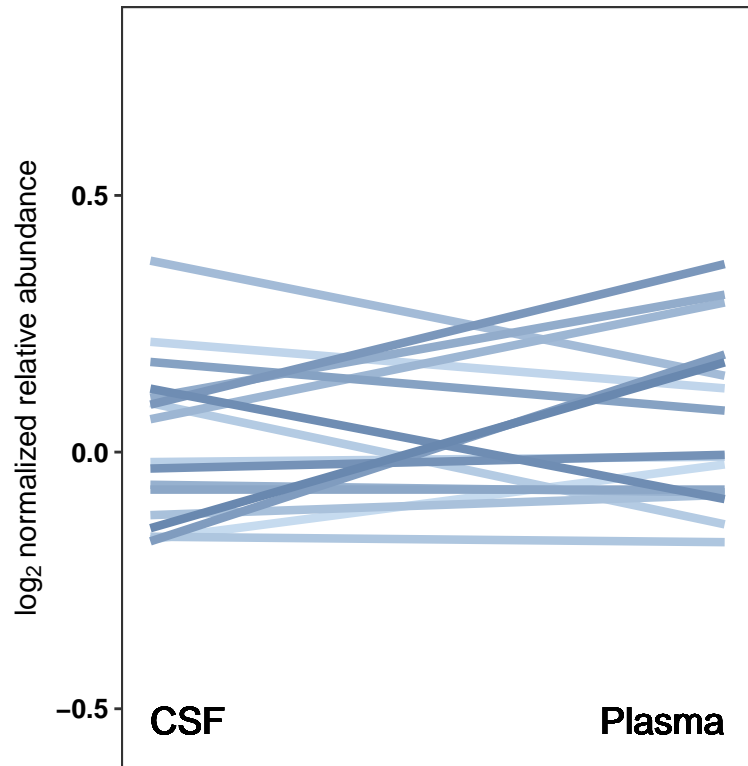

# M10 purple: Ossification/Bone Development

slopeDiff(AD-CT): 0.0733

Normal:

AD:

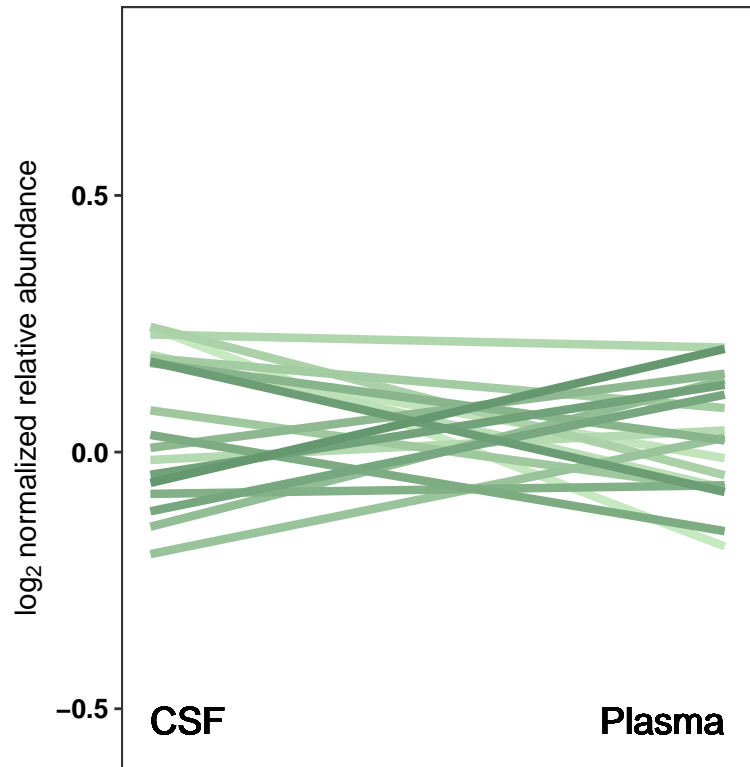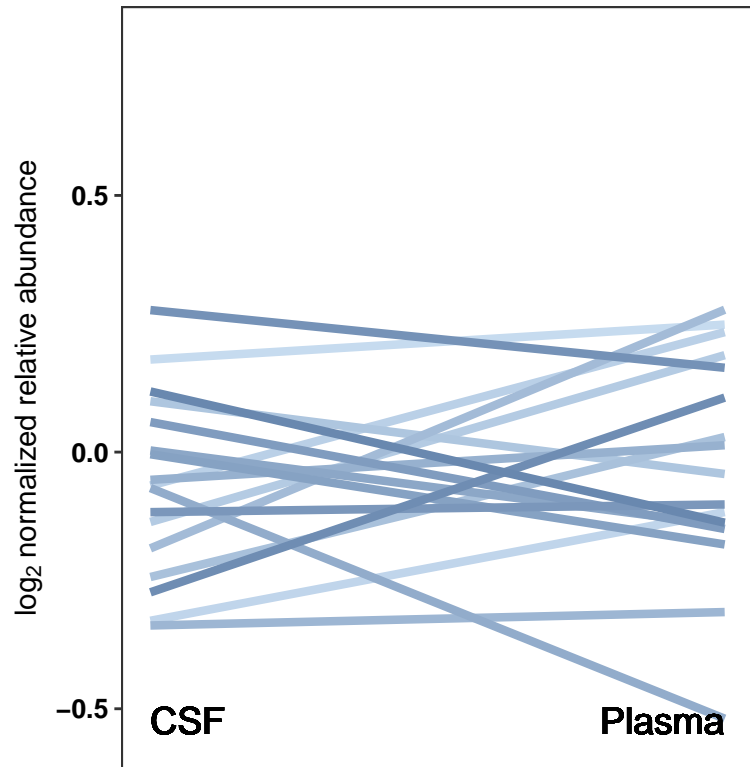

# M23 darkturquoise: Nucleic Acid/Steroid Metabolism

slopeDiff(AD-CT): -0.0465

Normal:

AD:

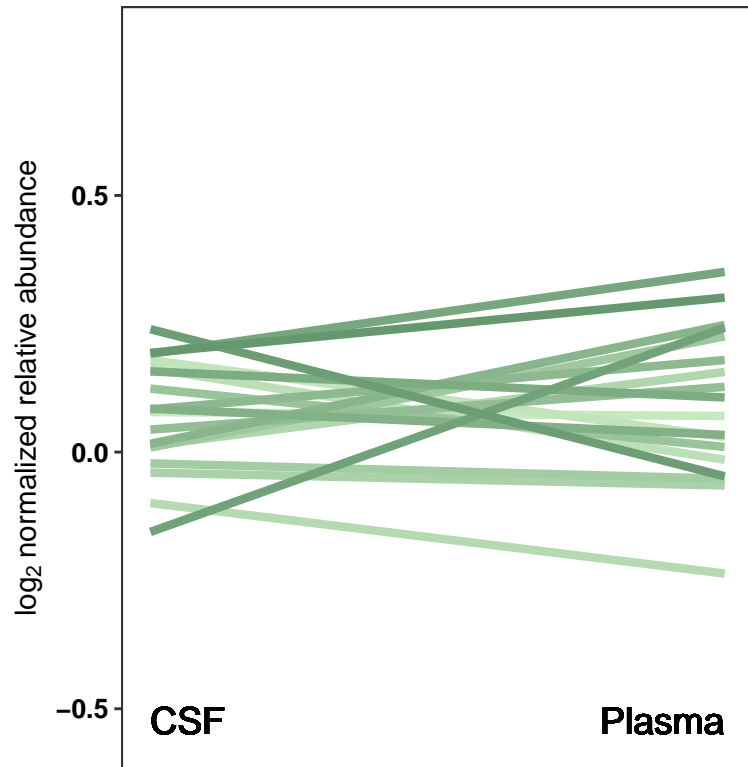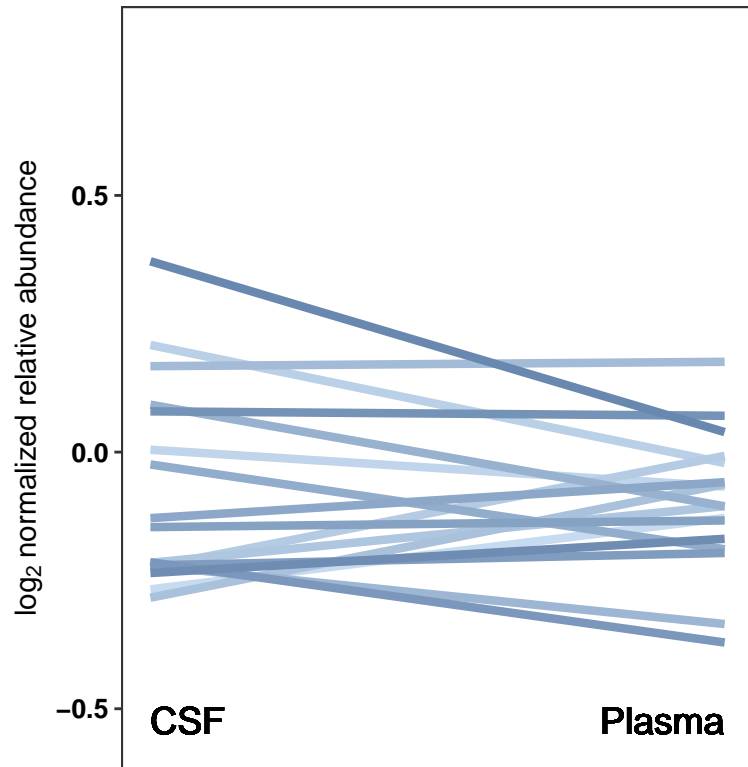

# M19 lightyellow: Synapse Organization

slopeDiff(AD-CT): -0.0333

Normal:

AD:

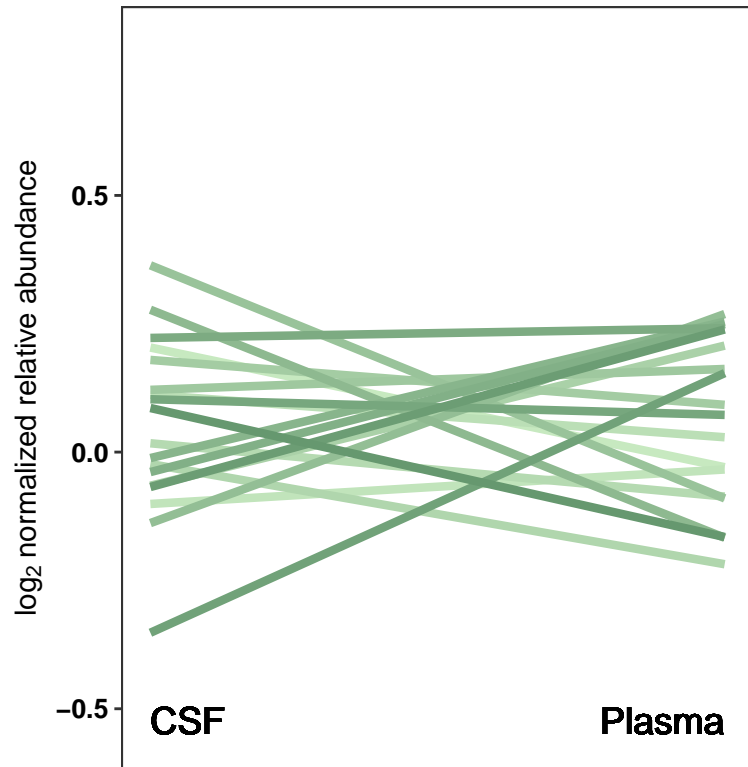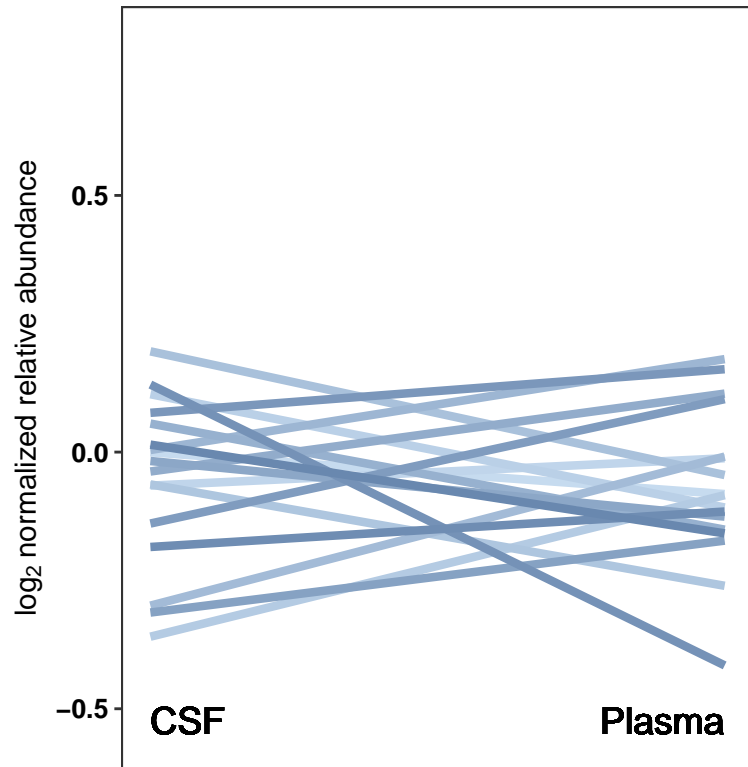

# M34 darkmagenta: Cofactor Biosynthesis

slopeDiff(AD-CT): 0.0113

Normal:

AD:

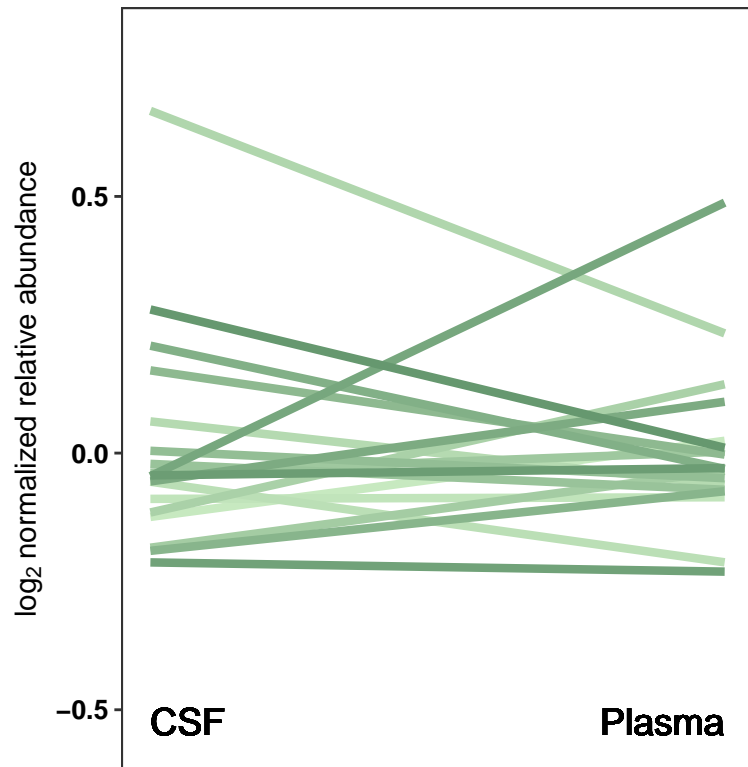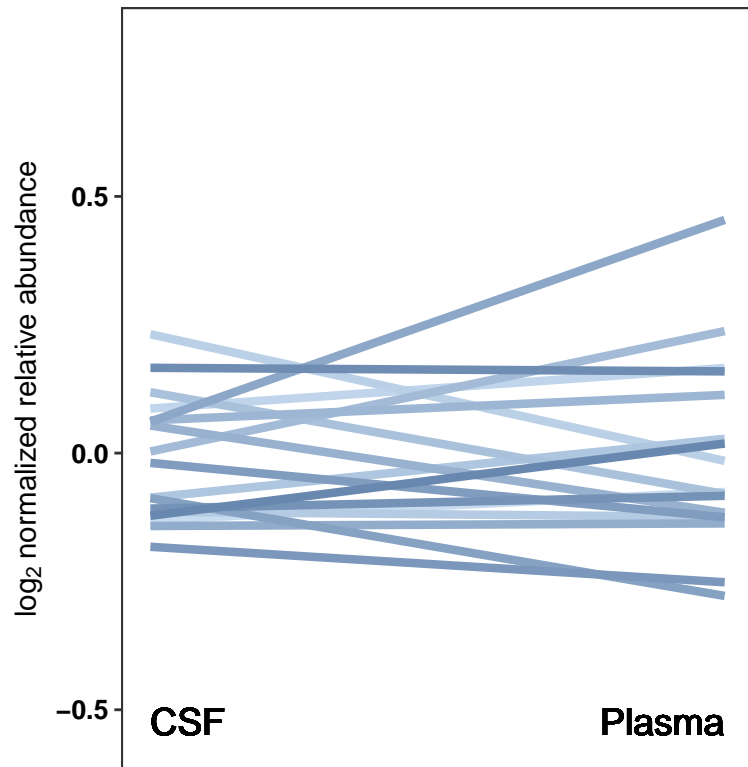

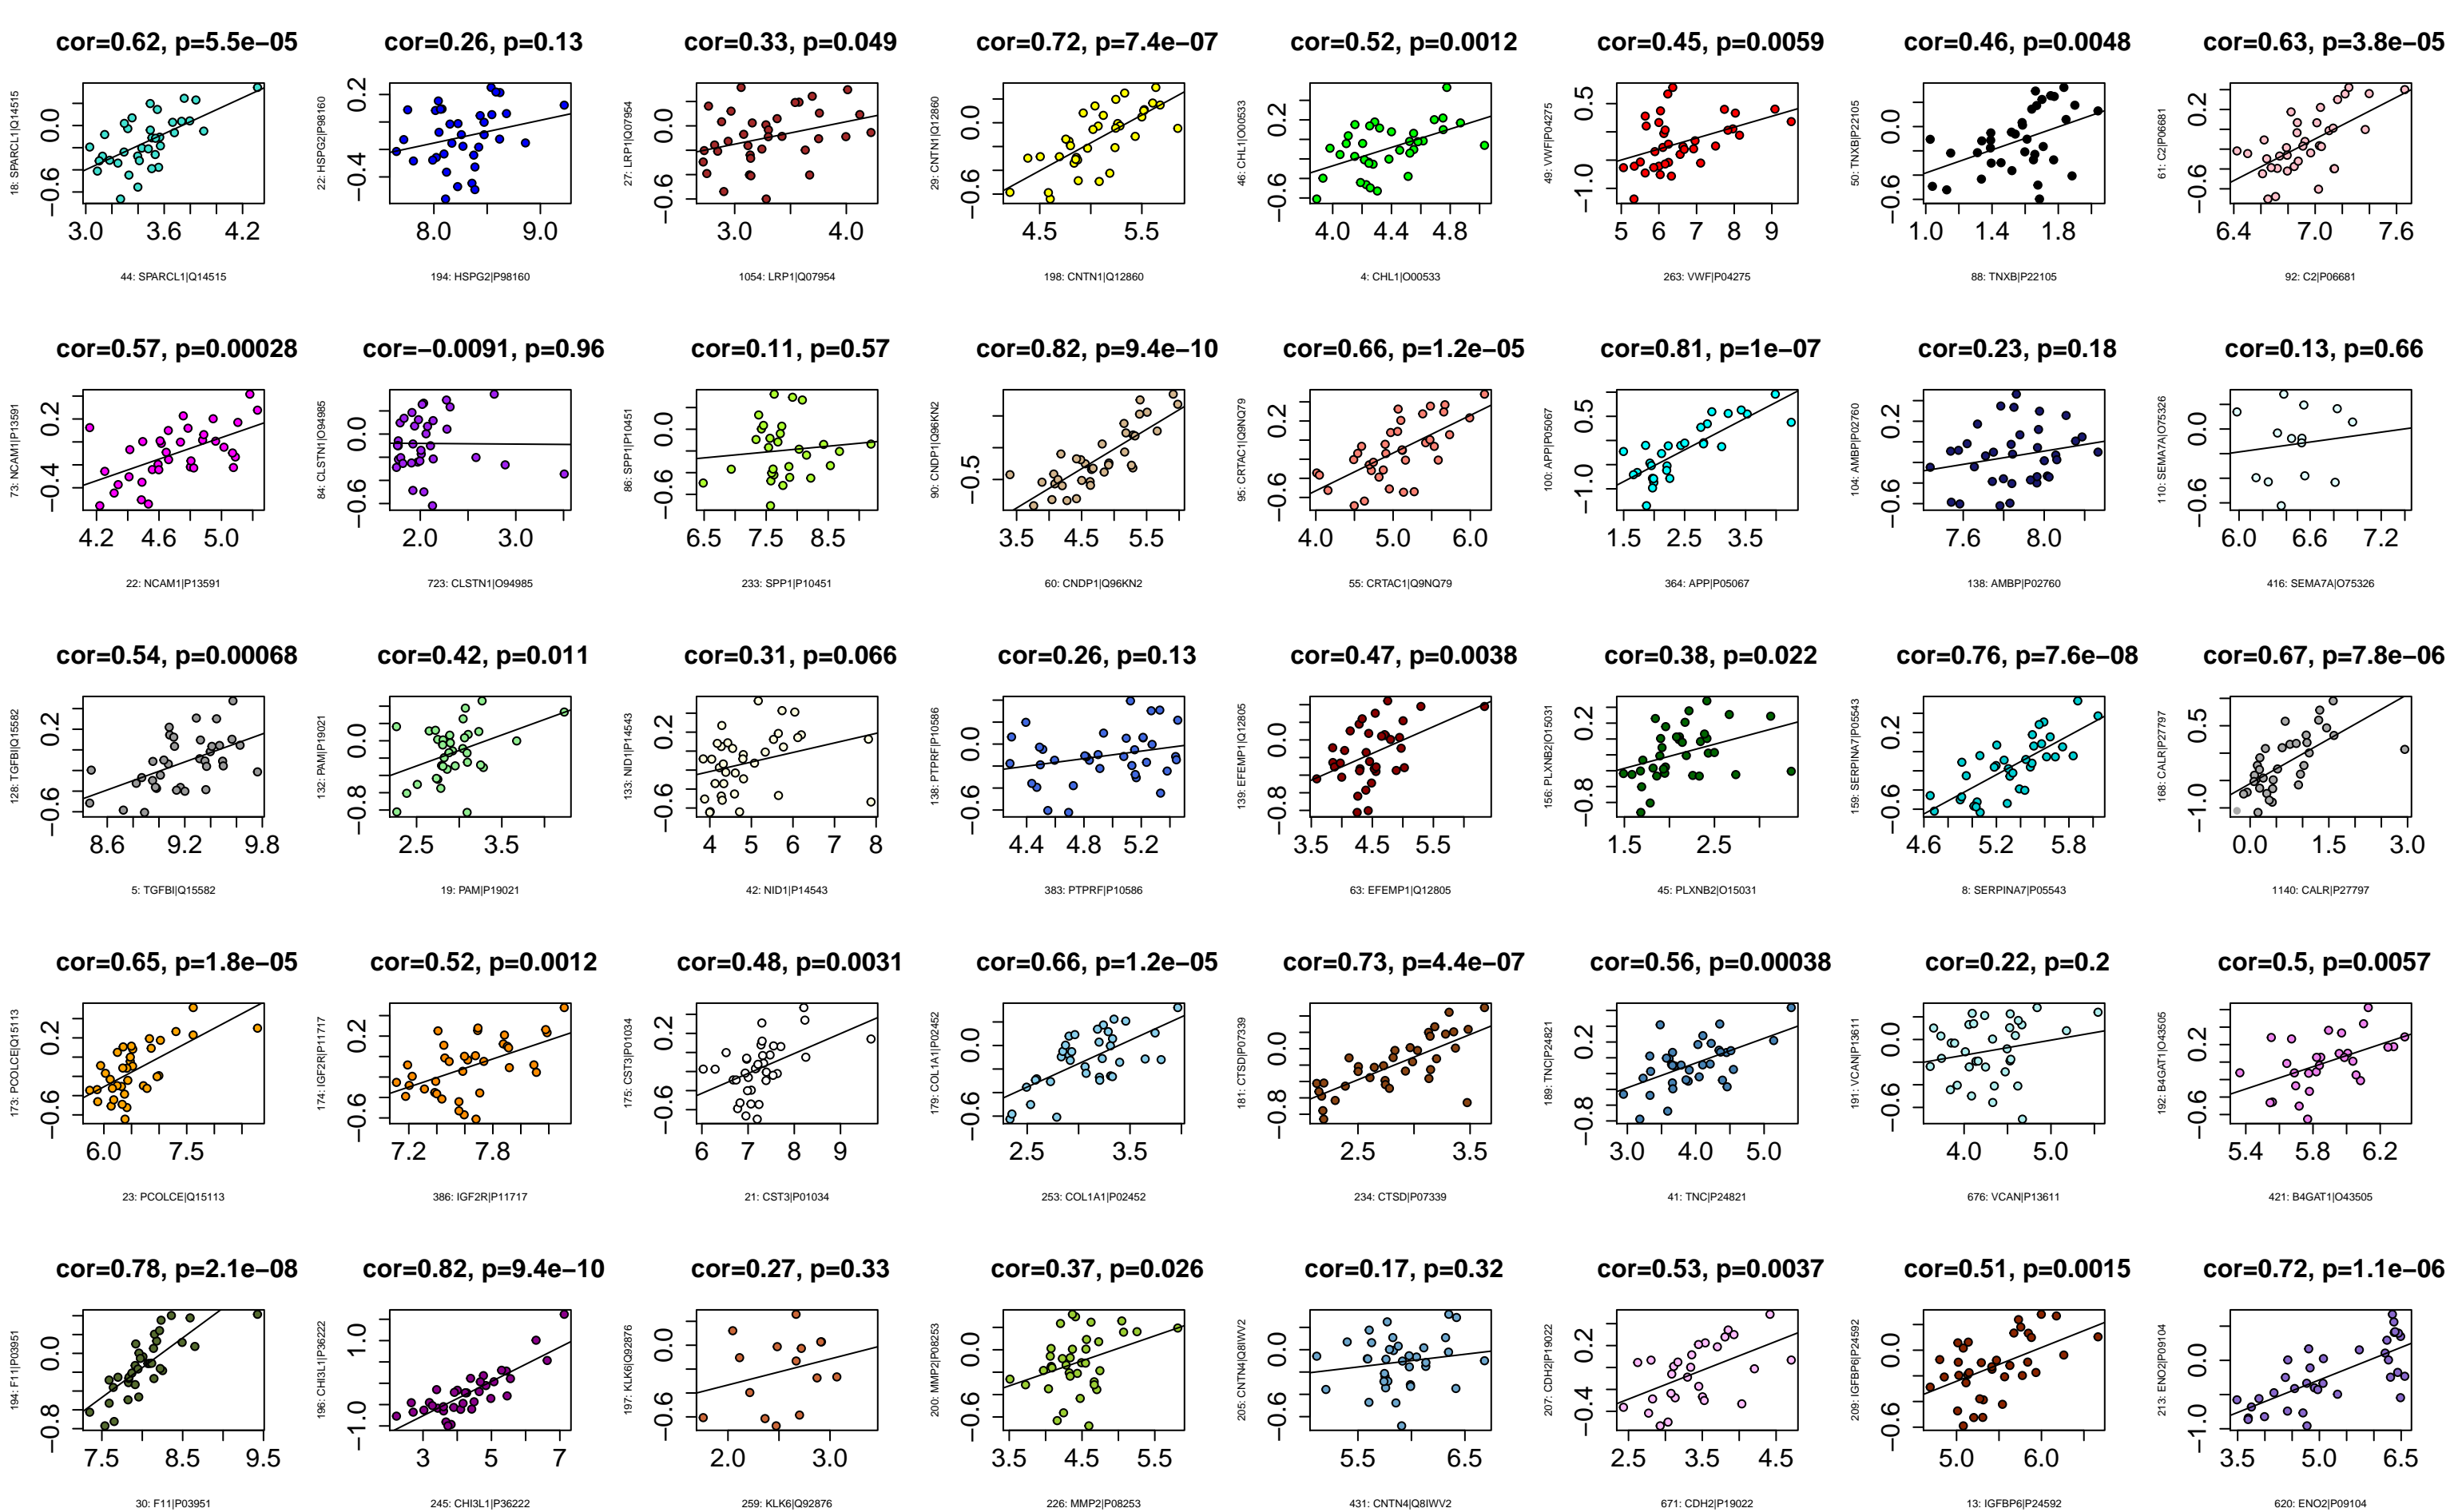

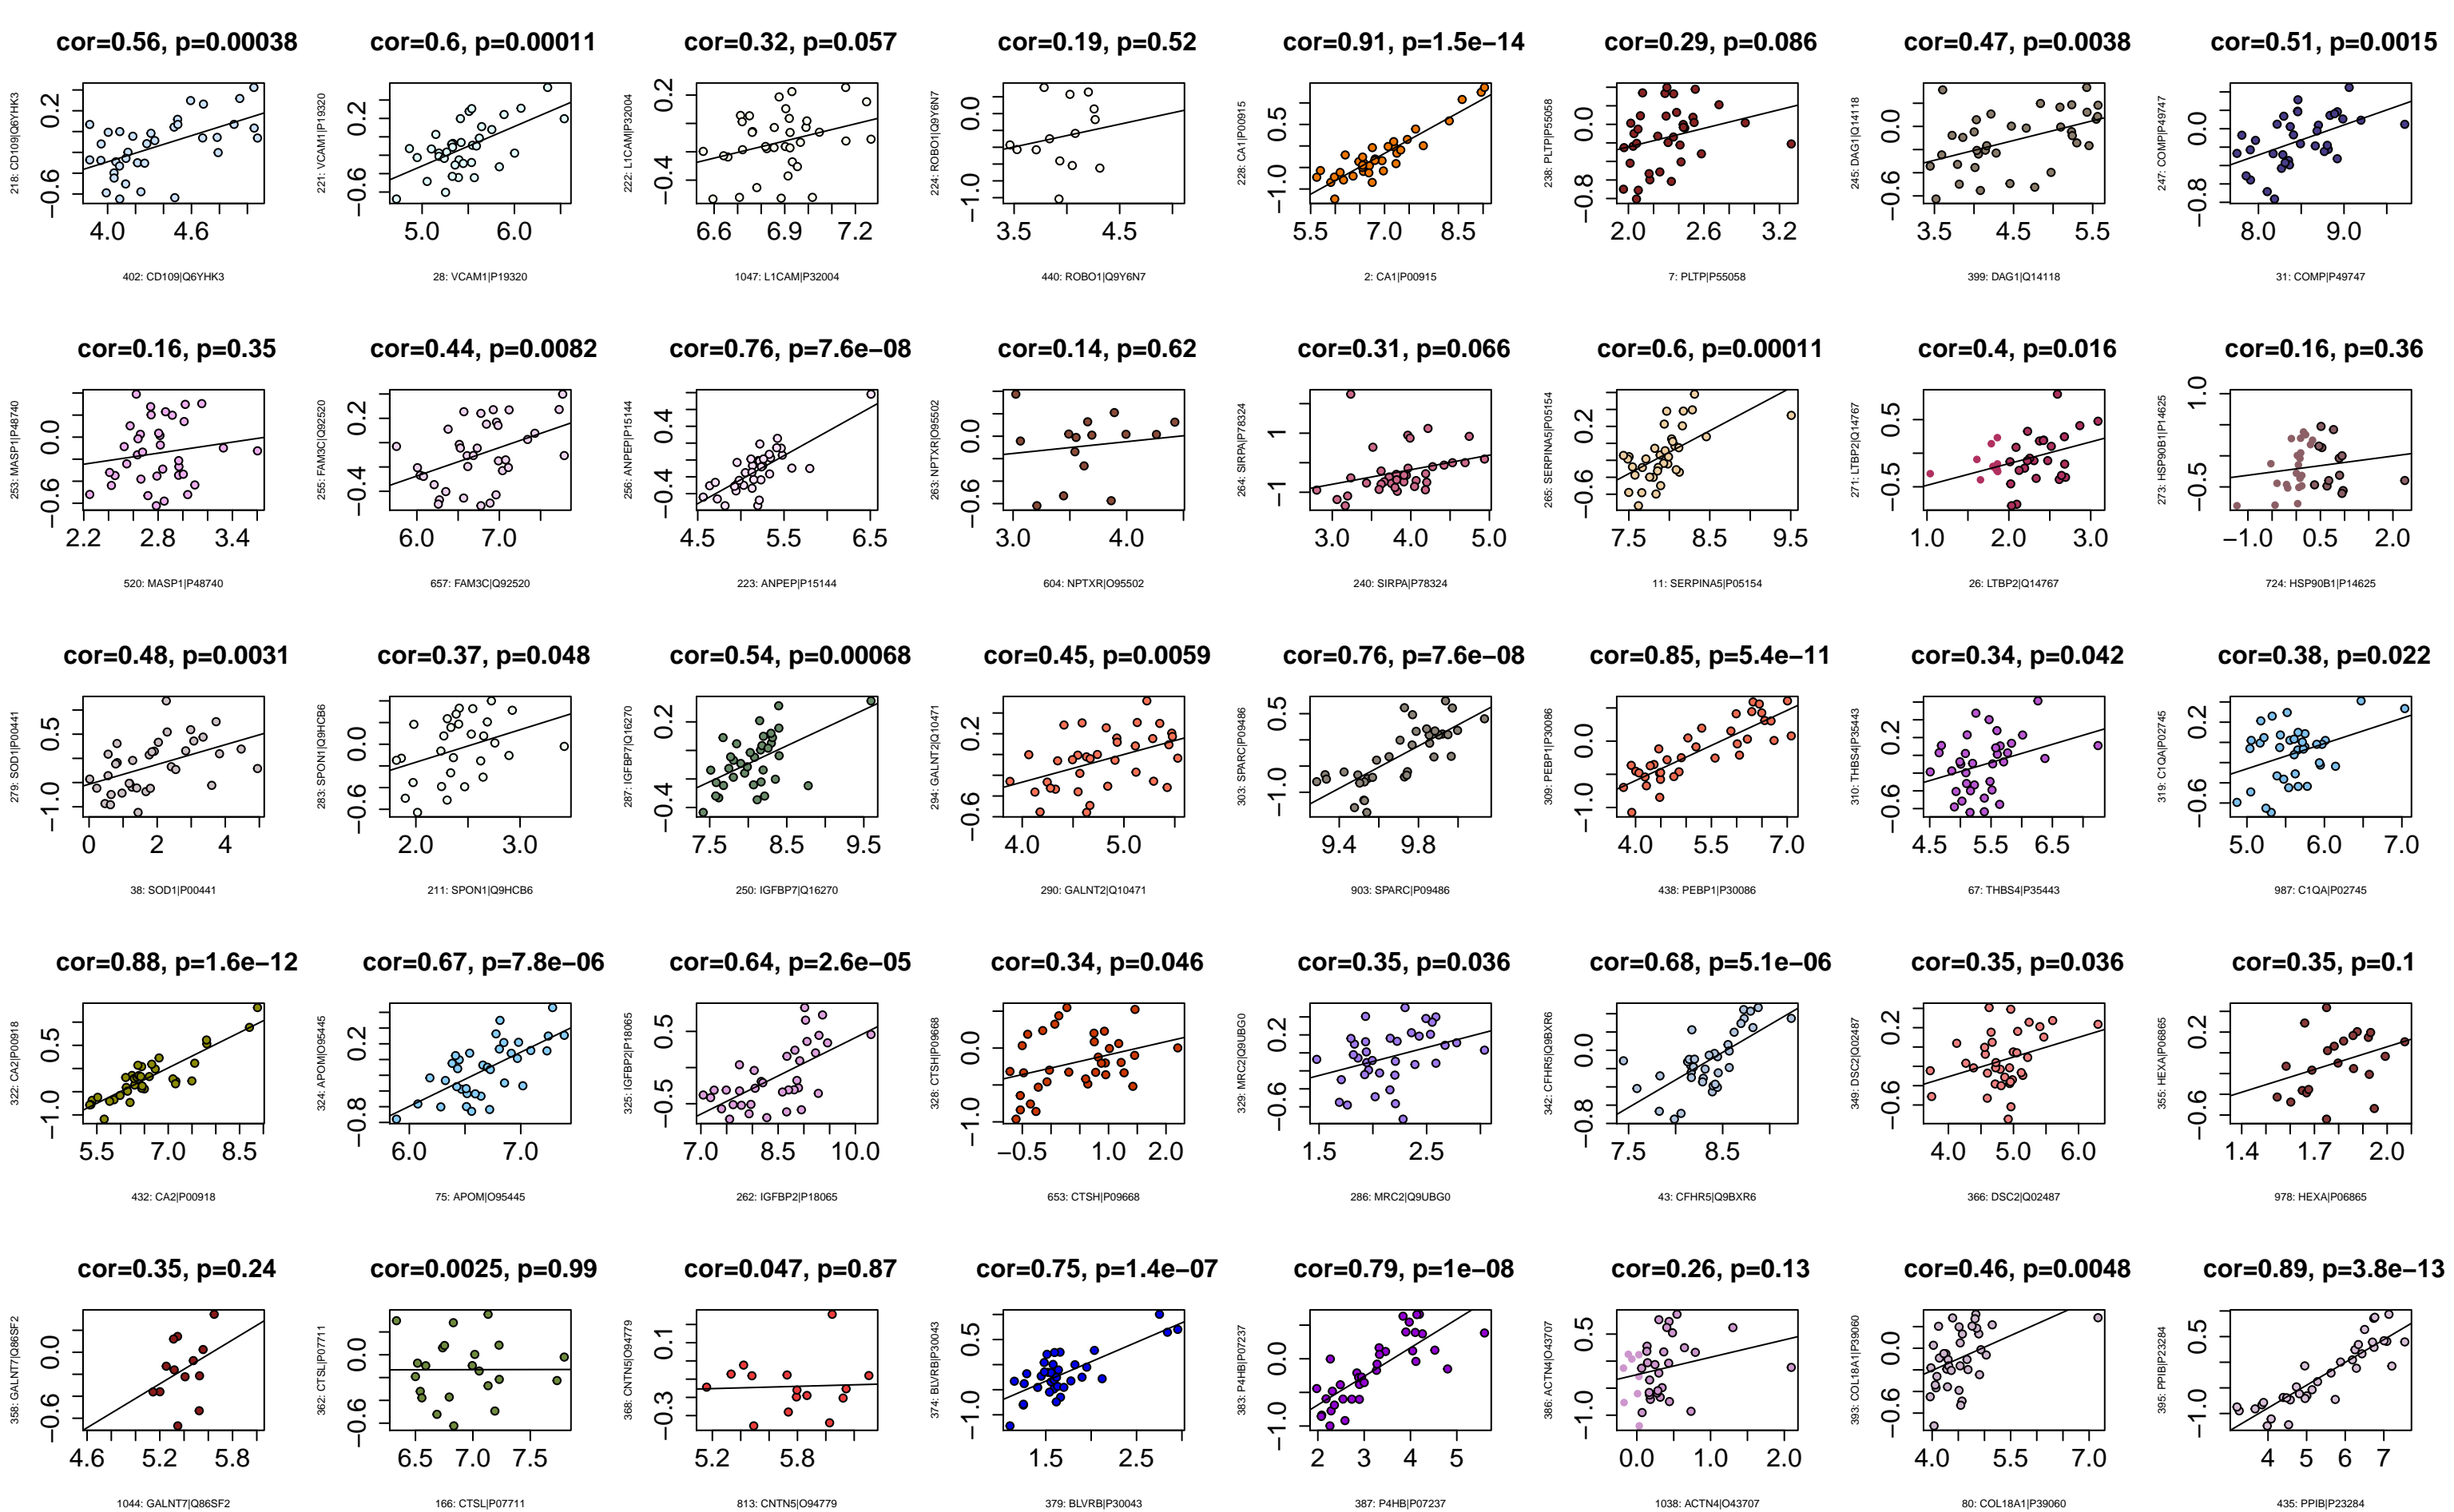

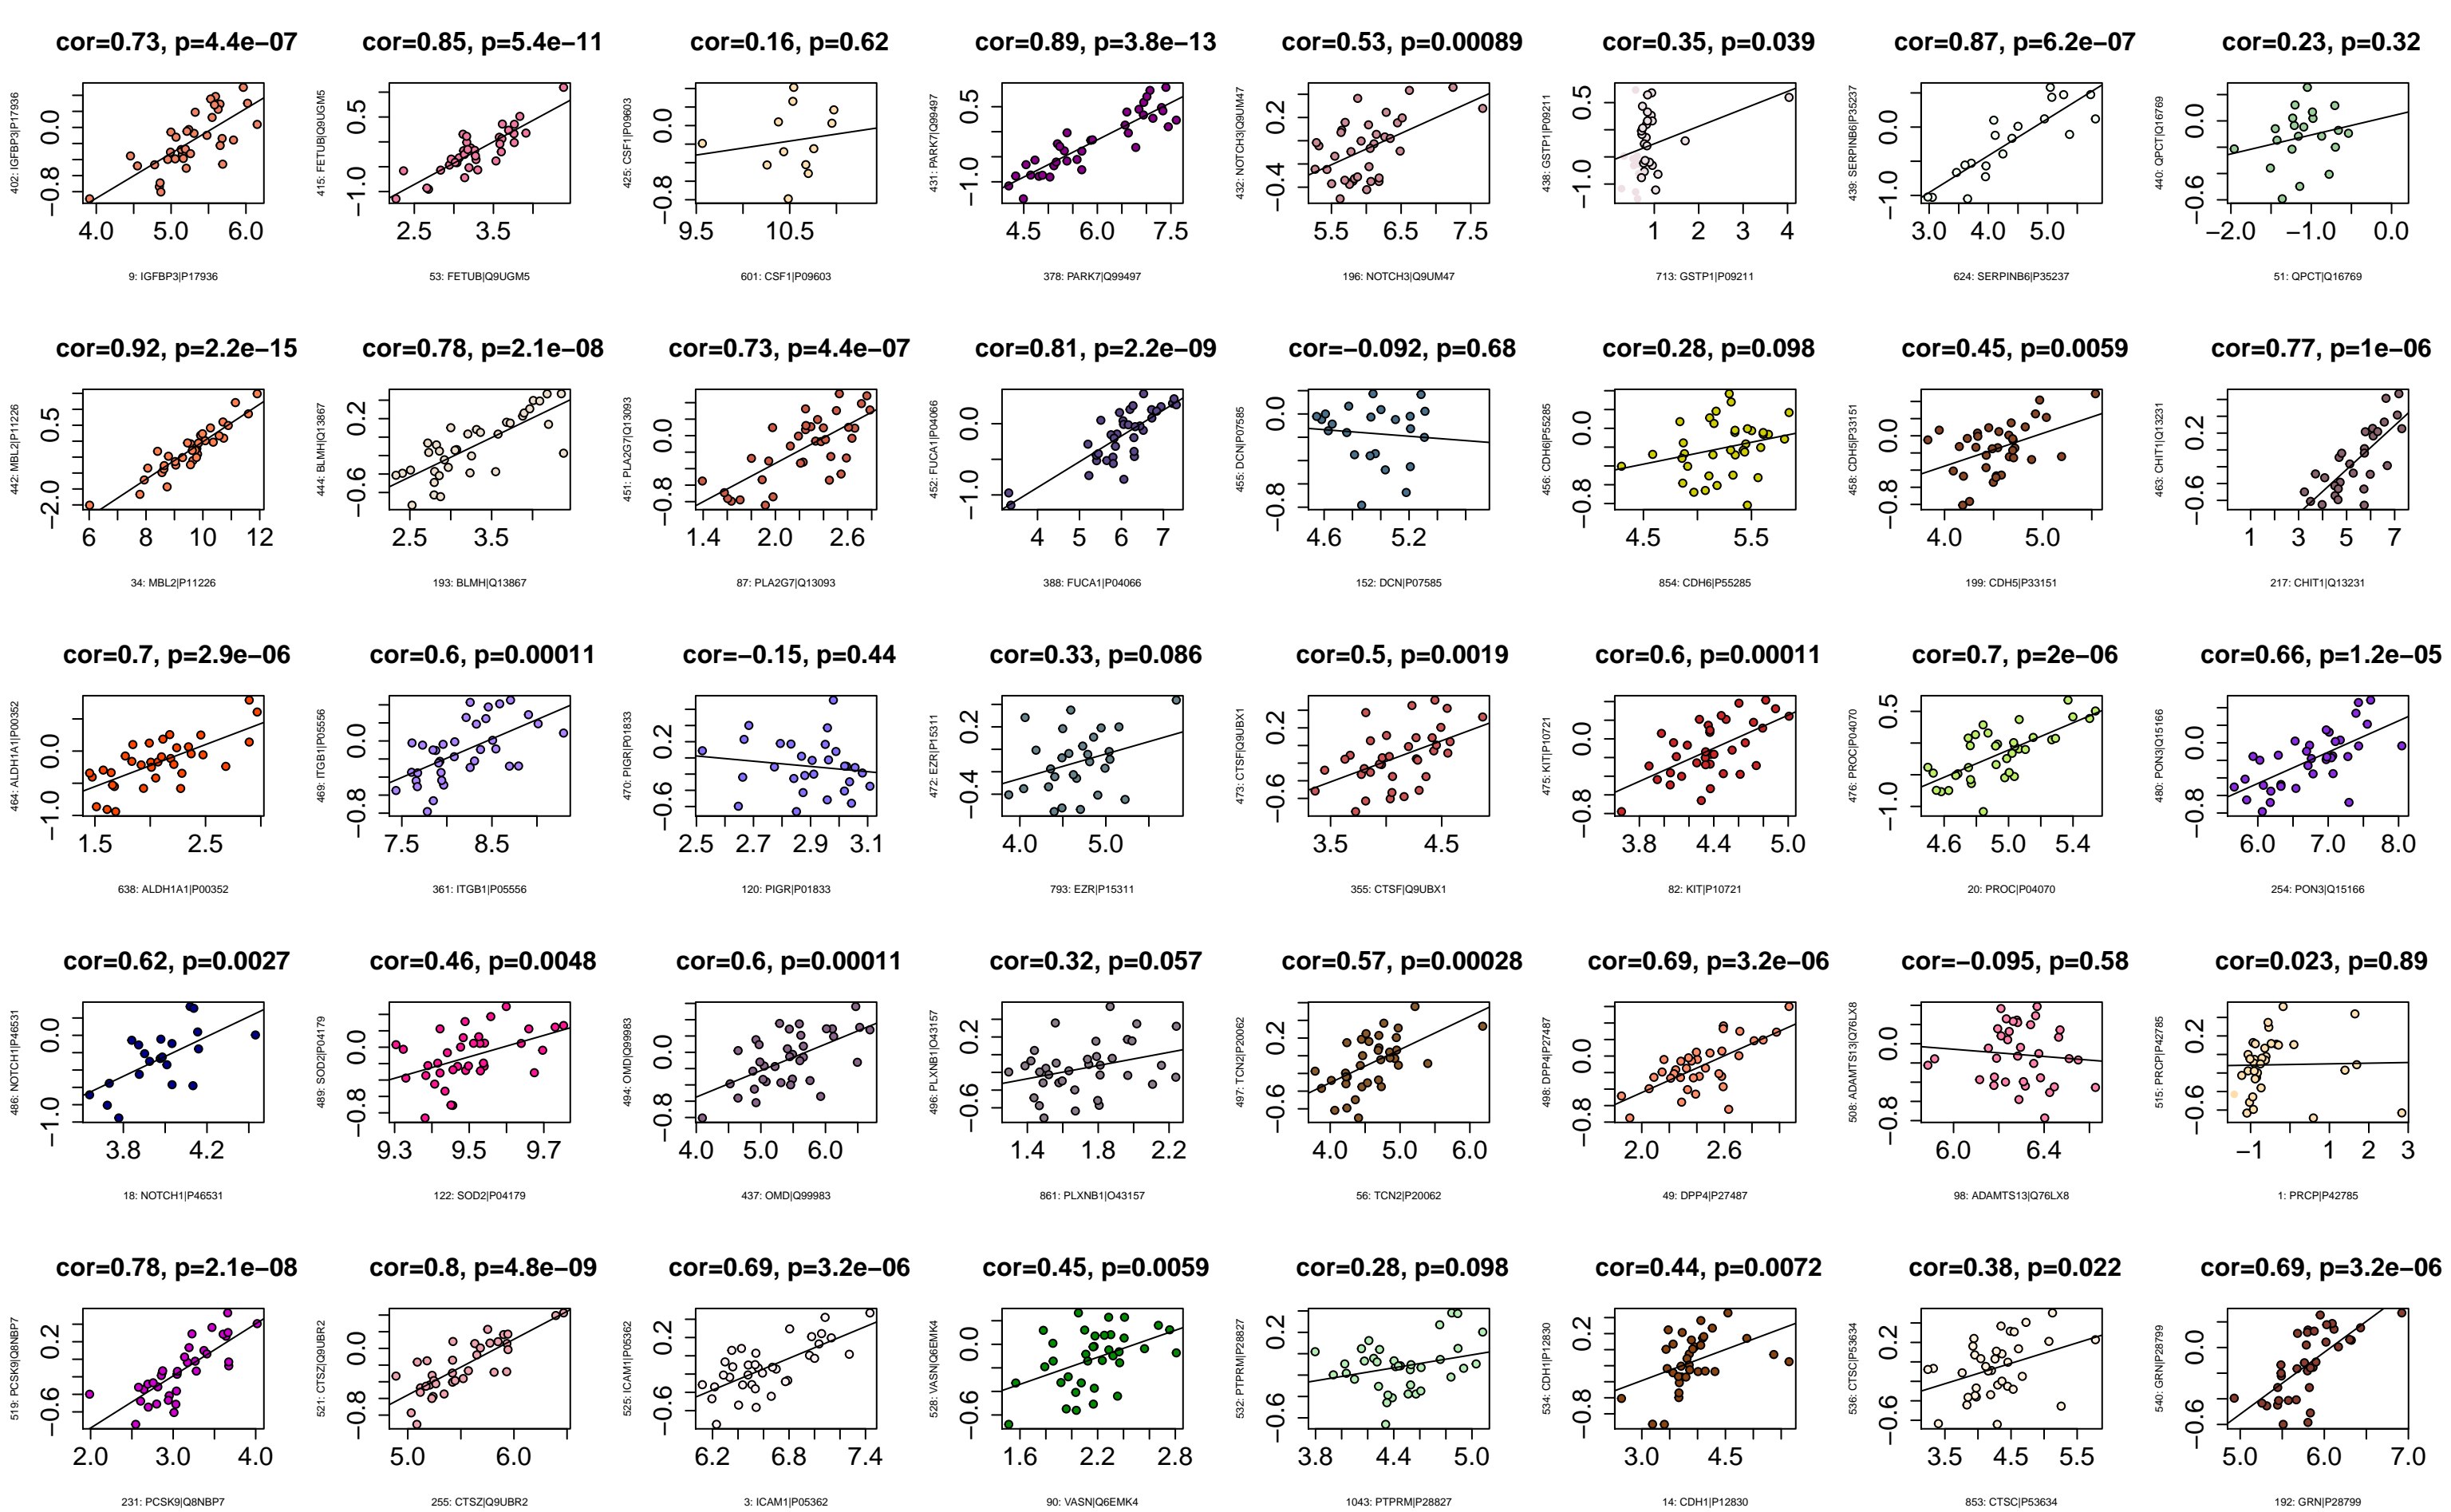



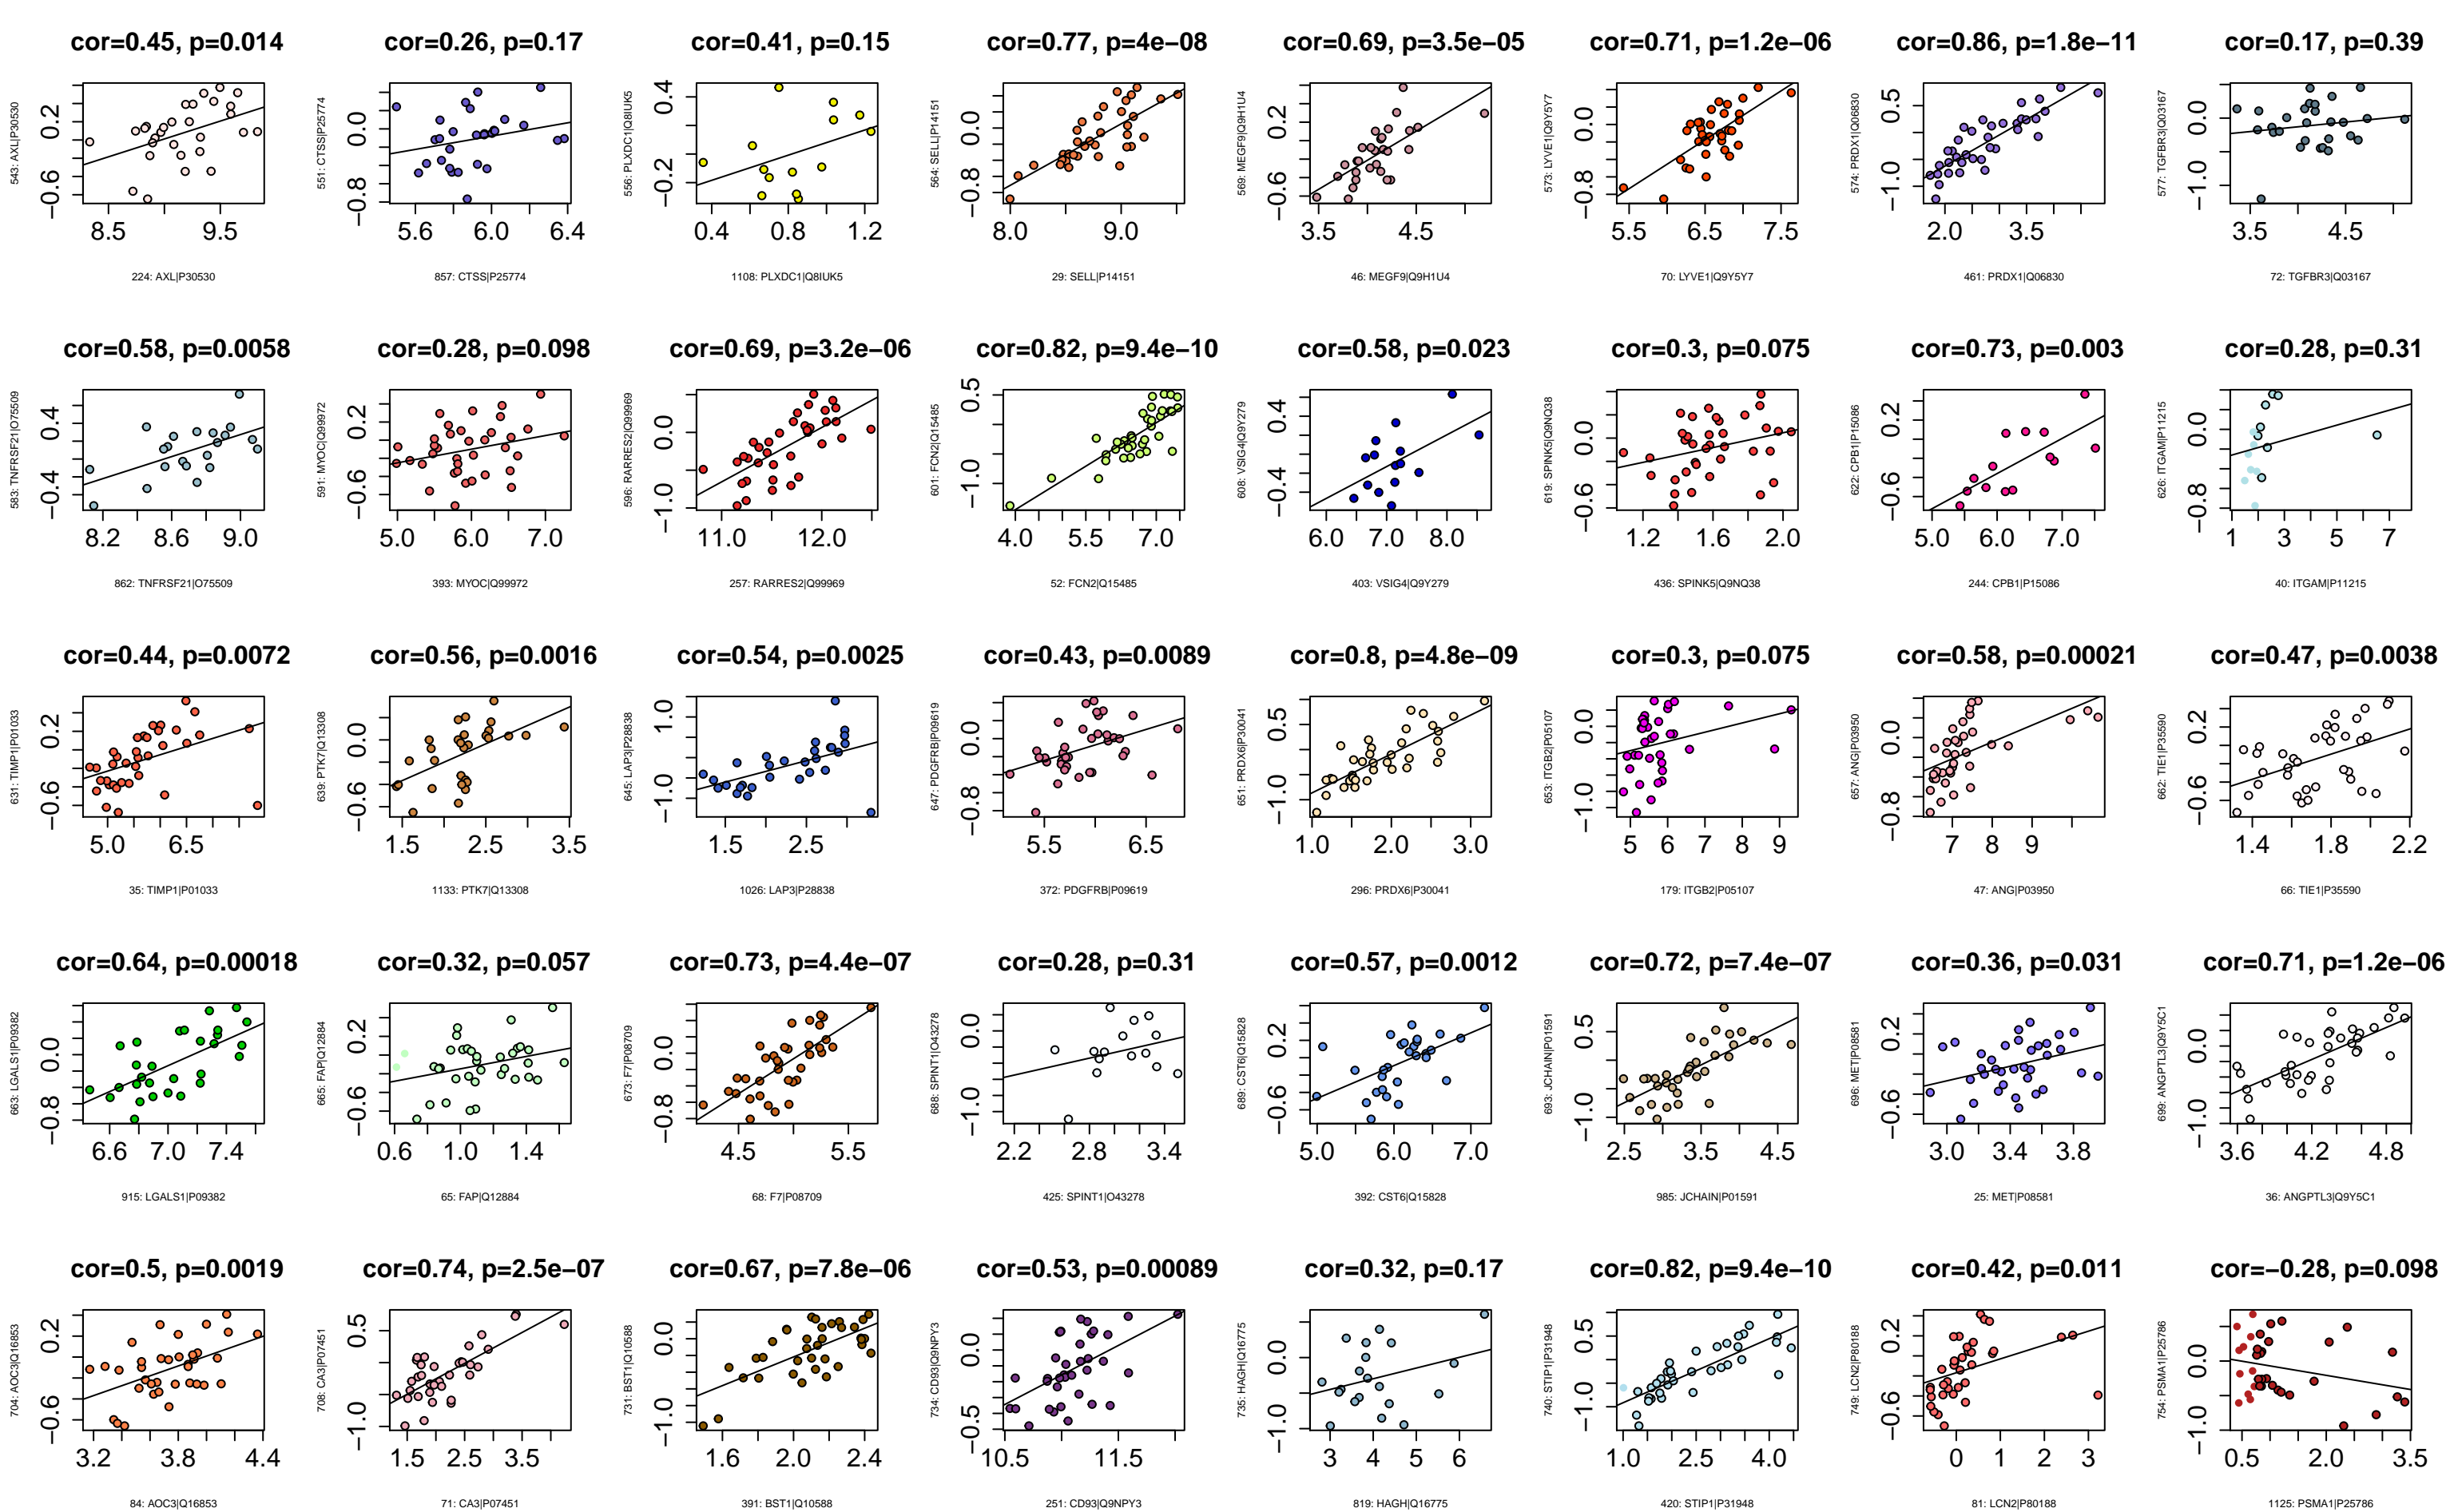

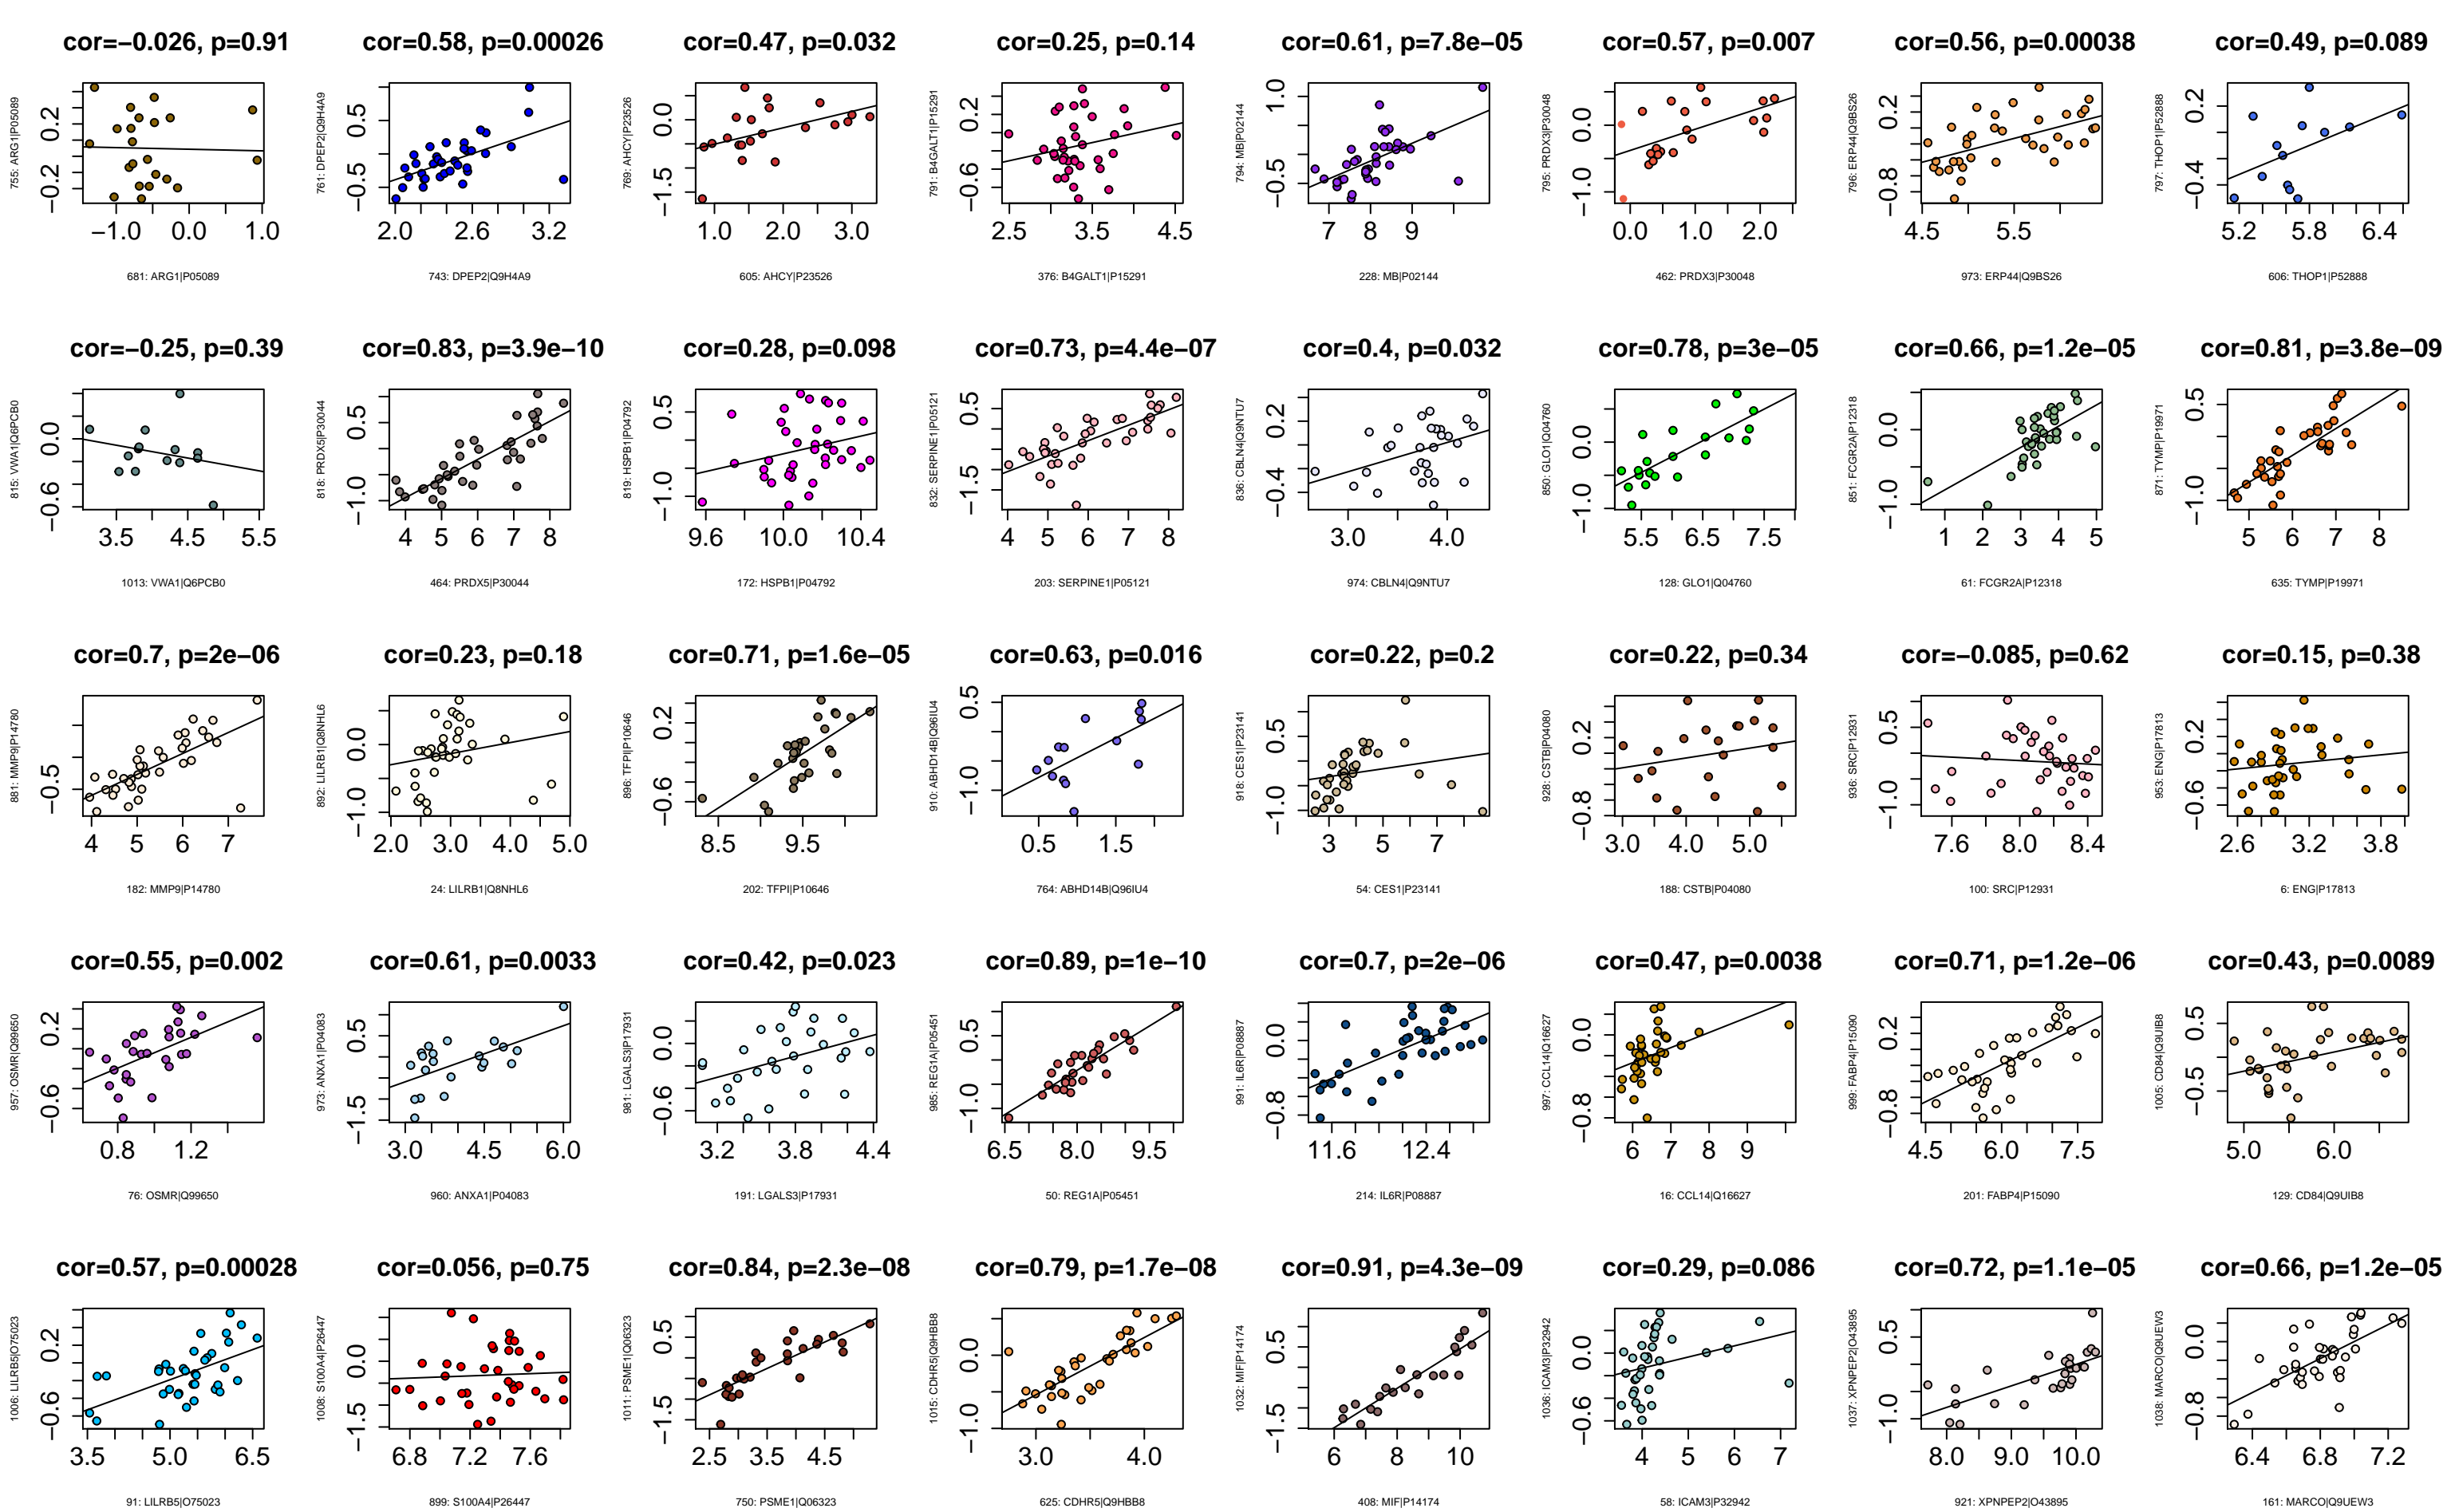

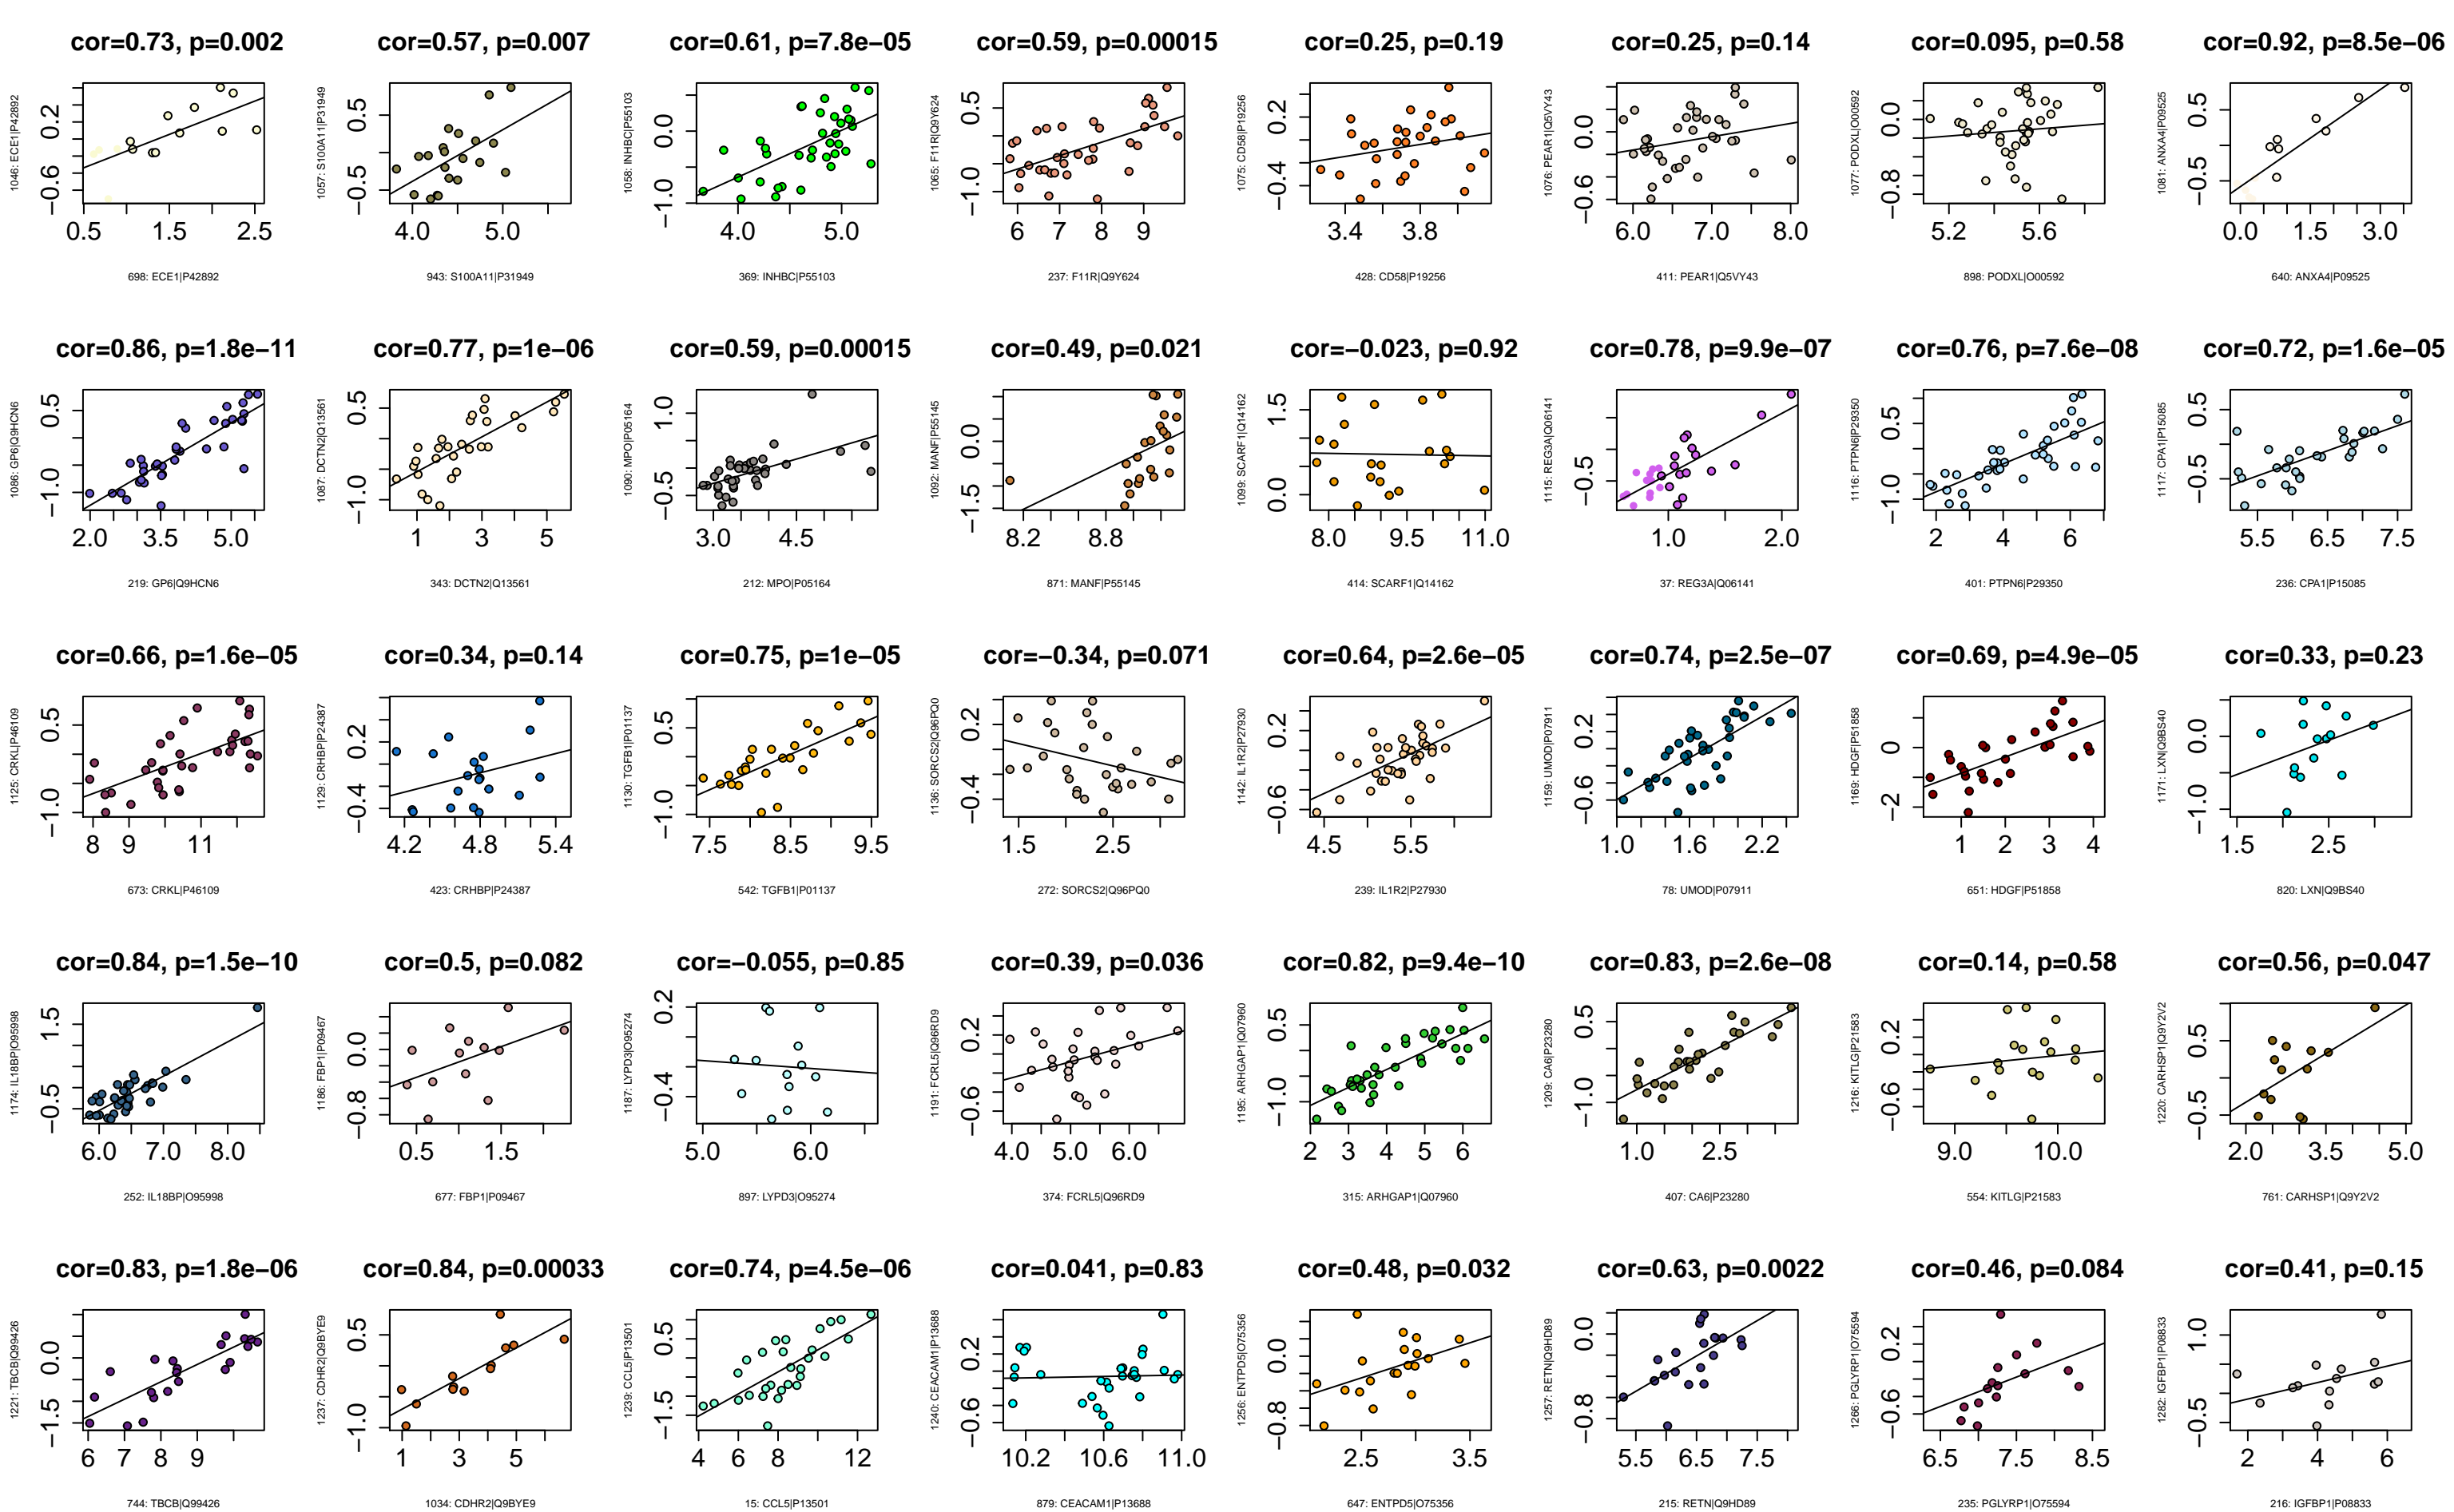

cor=0.38, p=0.098

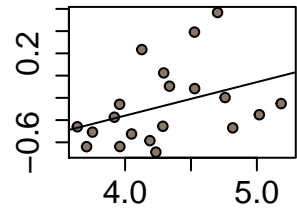

429: SCGB3A1|Q96QR1

cor=0.84, p=2.8e-10

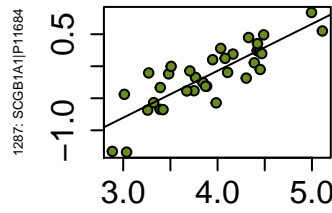

720: SCGB1A1|P11684

cor=0.34, p=0.13

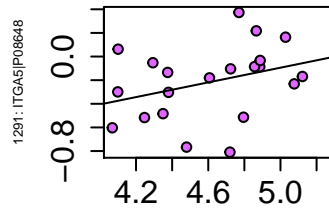

410: ITGA5|P08648

cor=0.8, p=1.3e-05

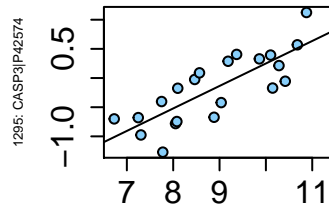

242: CASP3|P42574

cor=0.83, p=3.2e-06

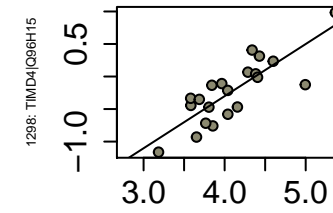

64: TIMD4|Q96H15

cor=0.73, p=1e-05

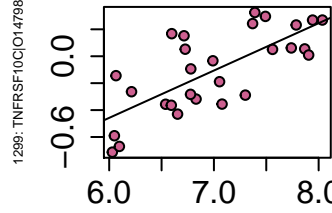

206: TNFRSF10C|Q14798

cor=0.8, p=5.5e-07

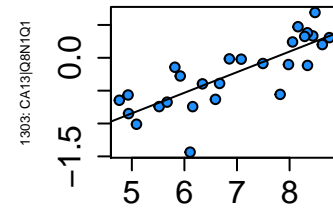

628: CA13|Q8N1Q1

cor=0.37, p=0.09

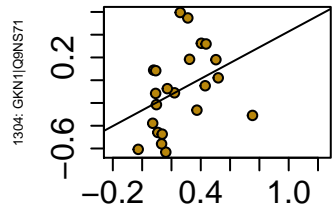

295: GKN1|Q9NS71

cor=0.1, p=0.73

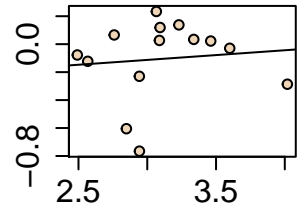

634: ADGRG2|Q8IZP9

cor=0.45, p=0.041

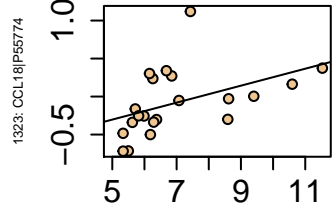

79: CCL18|P55774

cor=0.079, p=0.78

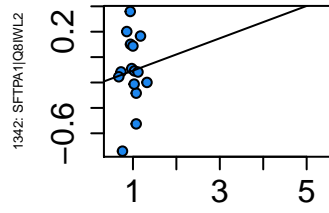

1018: SFTPA1|Q8IWL2

cor=0.85, p=0.00023

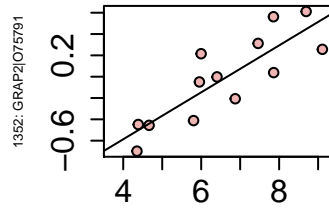

636: GRAP2|Q75791

cor=0.85, p=0.00012

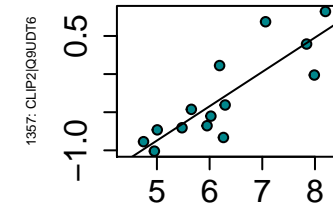

1022: CLIP2|Q9UDT6

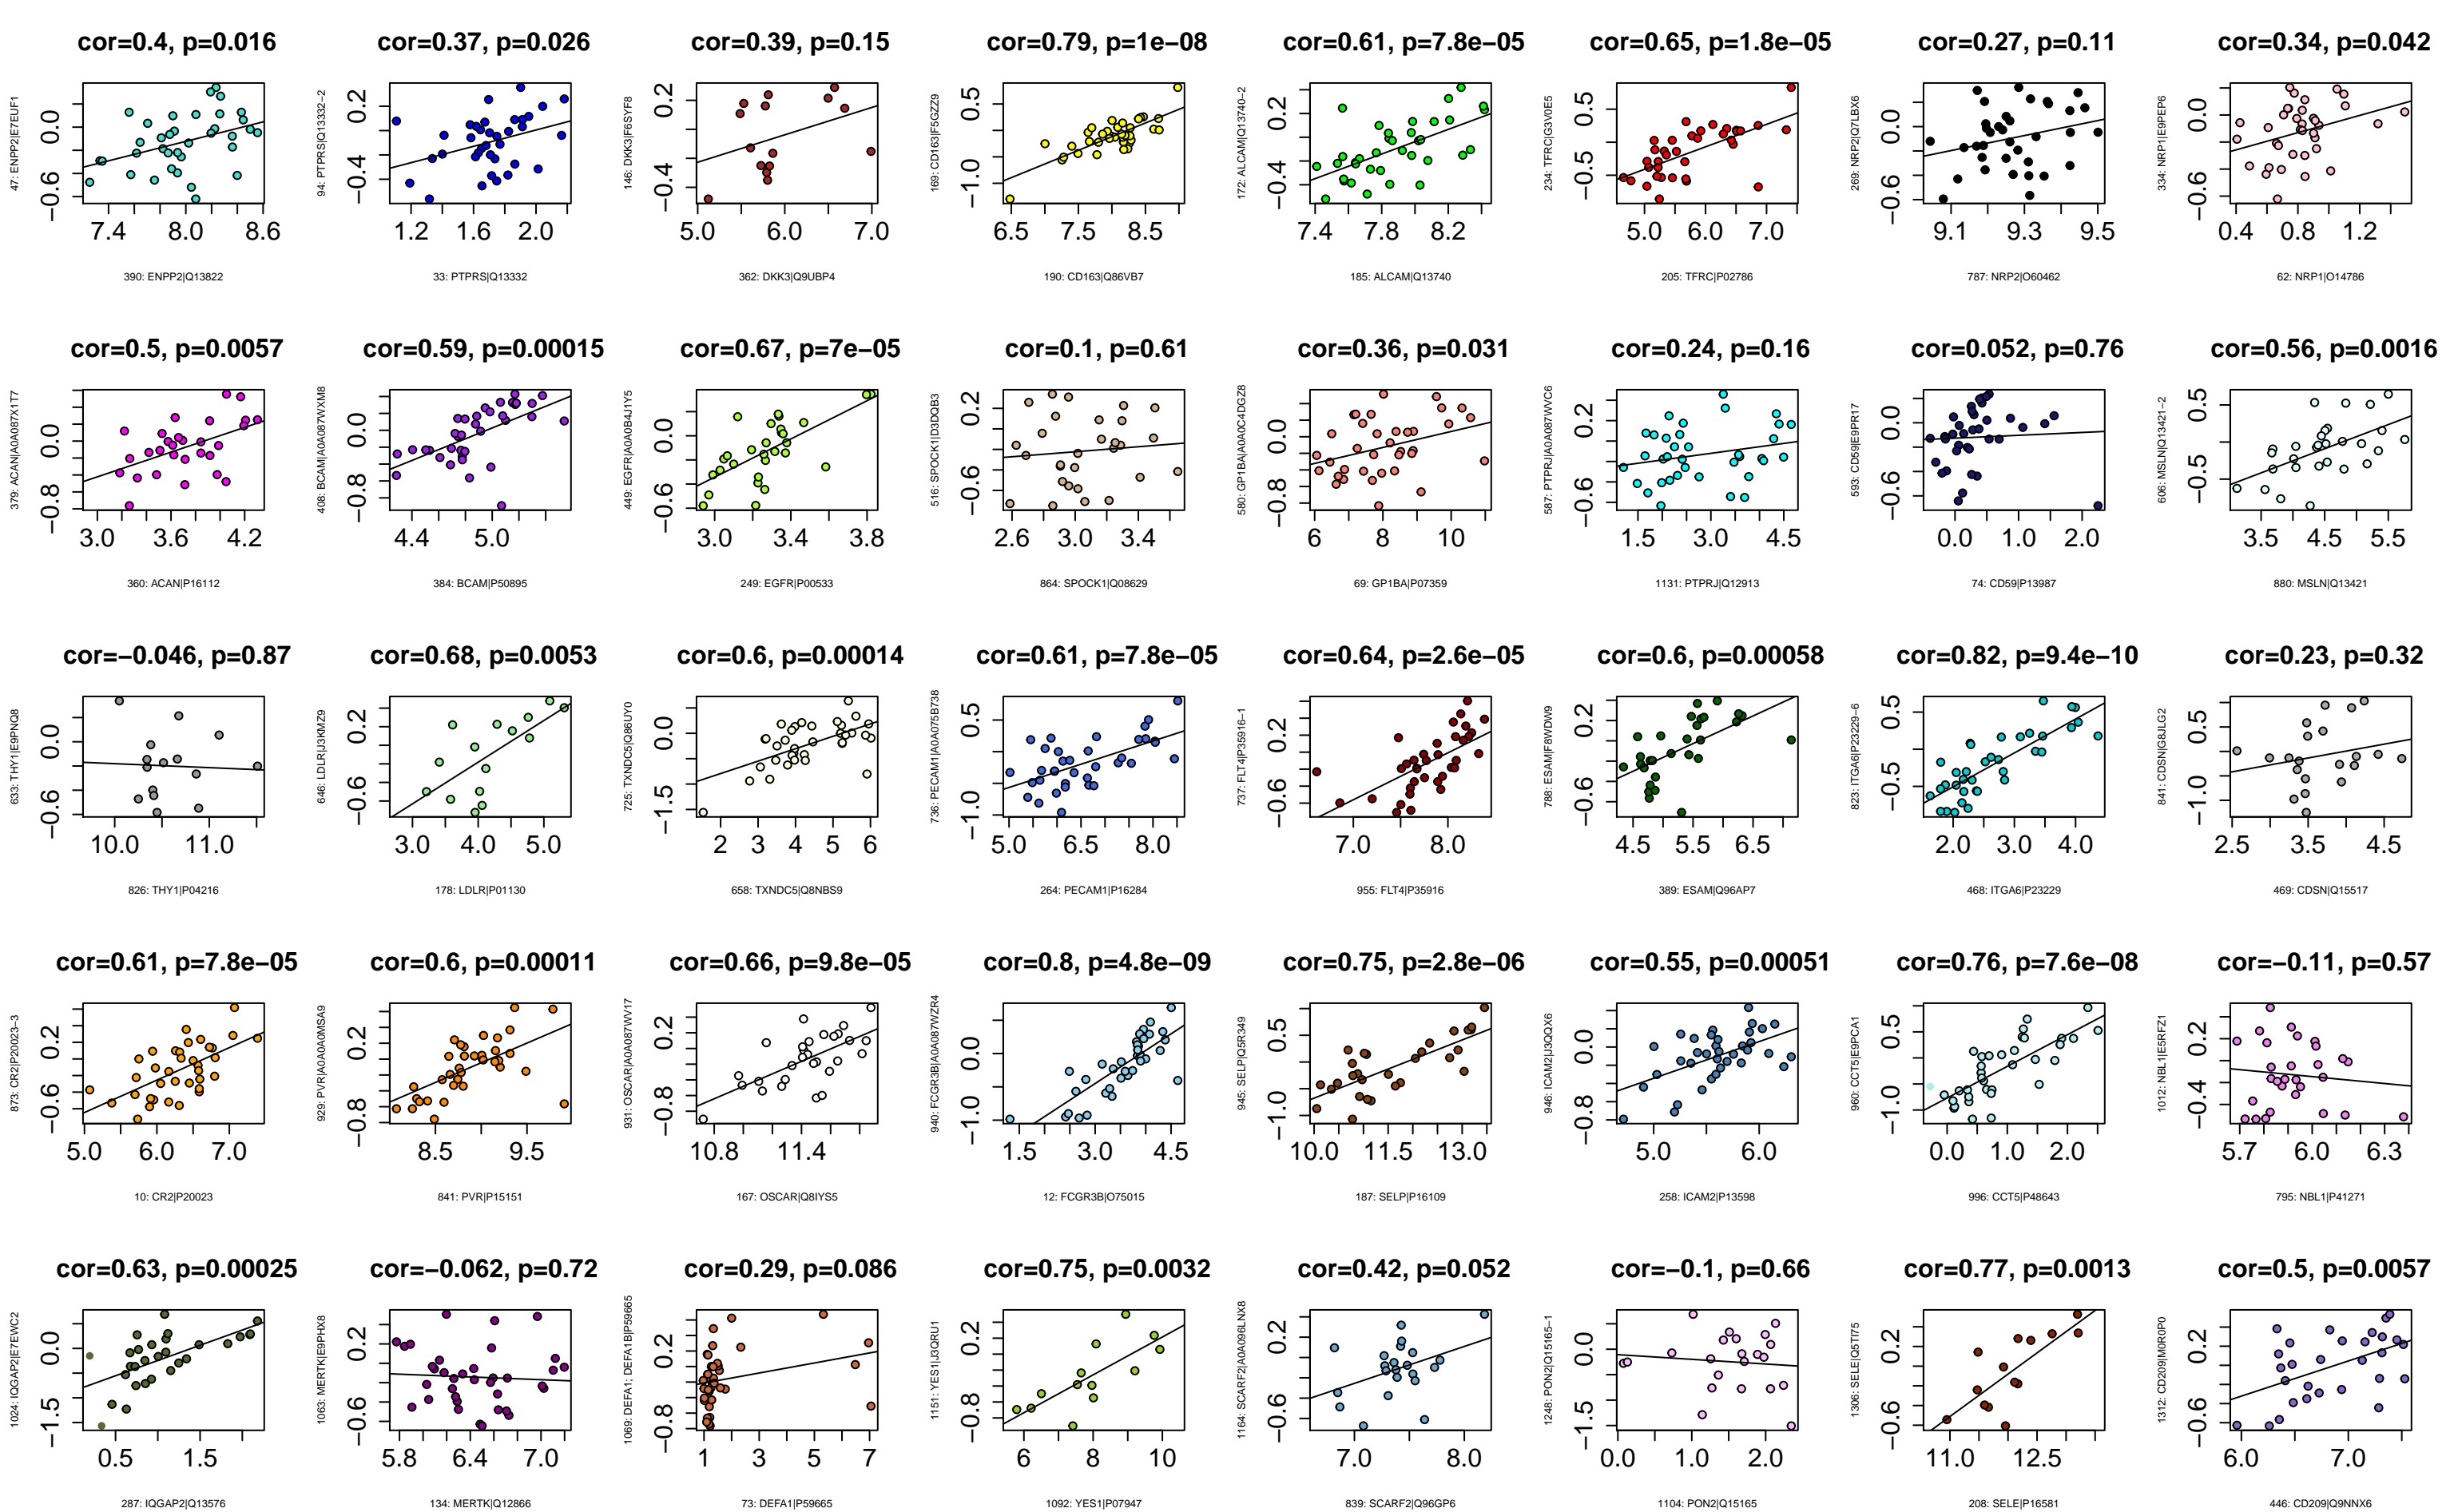

1341: IL1R1|B9A040

**cor=0.41, p=0.15**

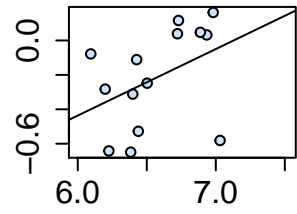

225: IL1R1|P14778

1351: METAP2|F8VSC4

**cor=-0.093, p=0.75**

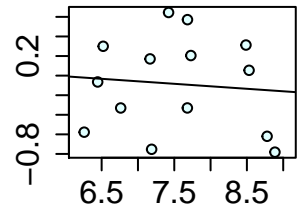

910: METAP2|P50579

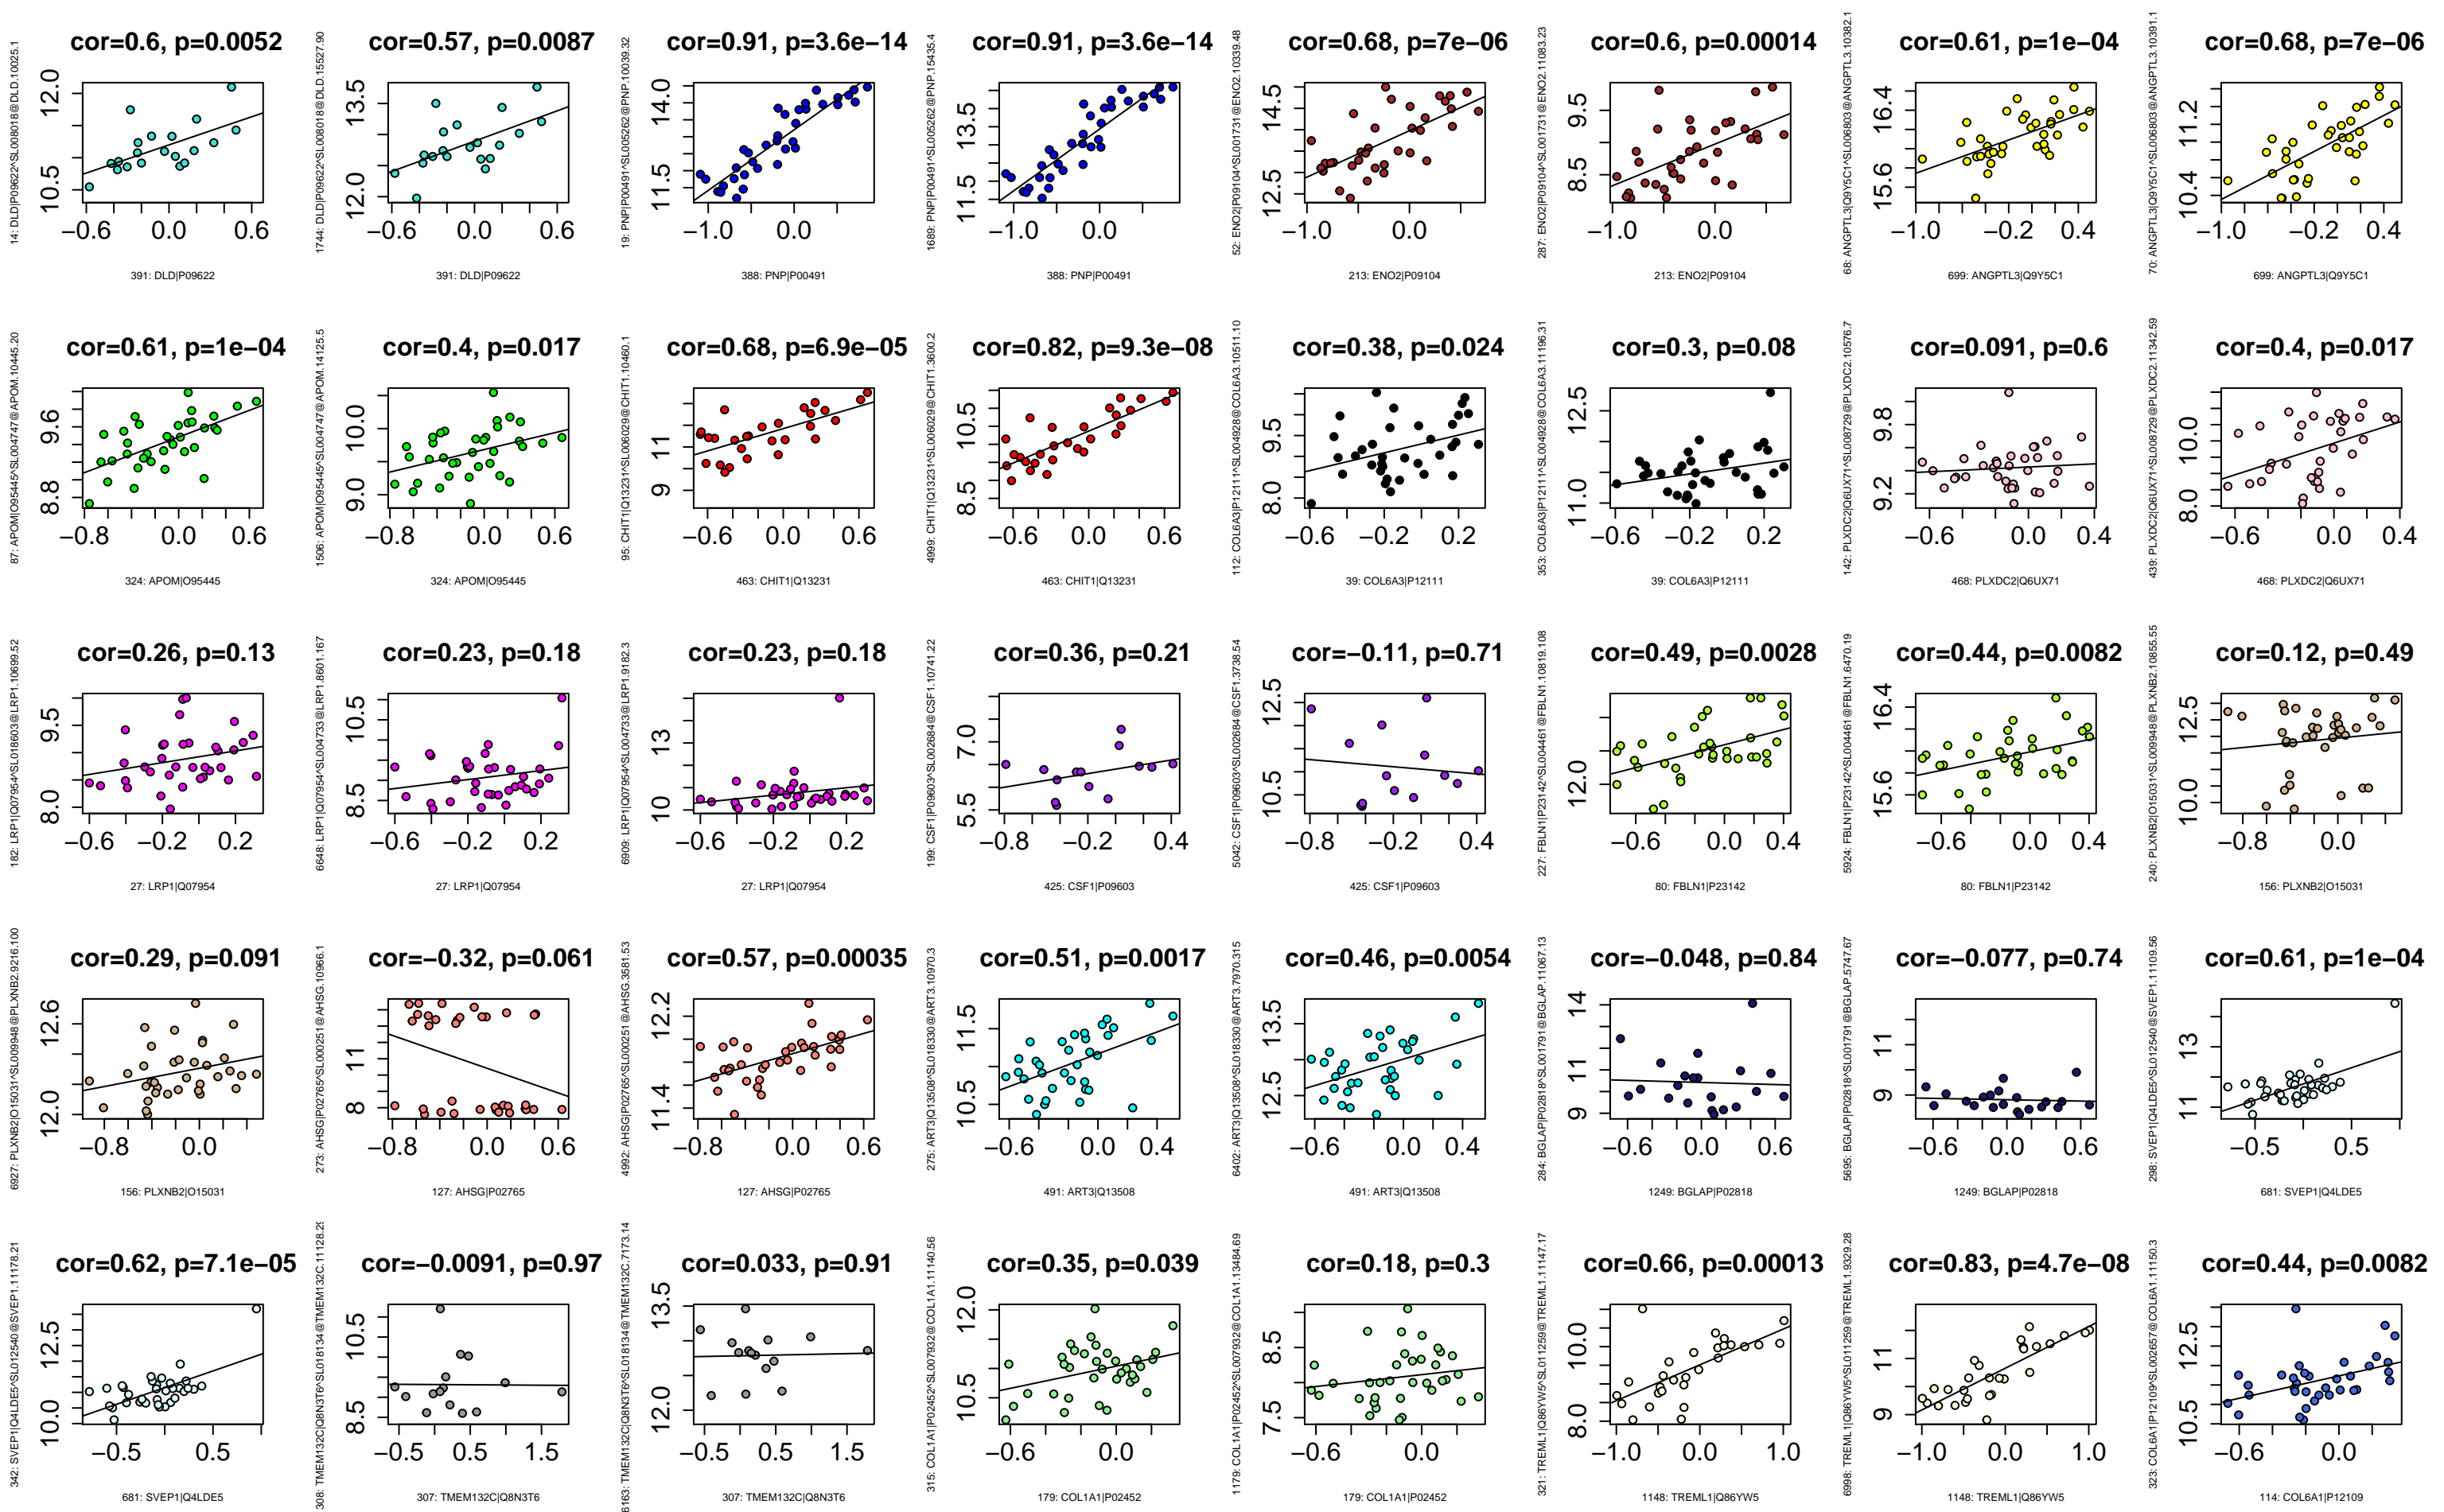

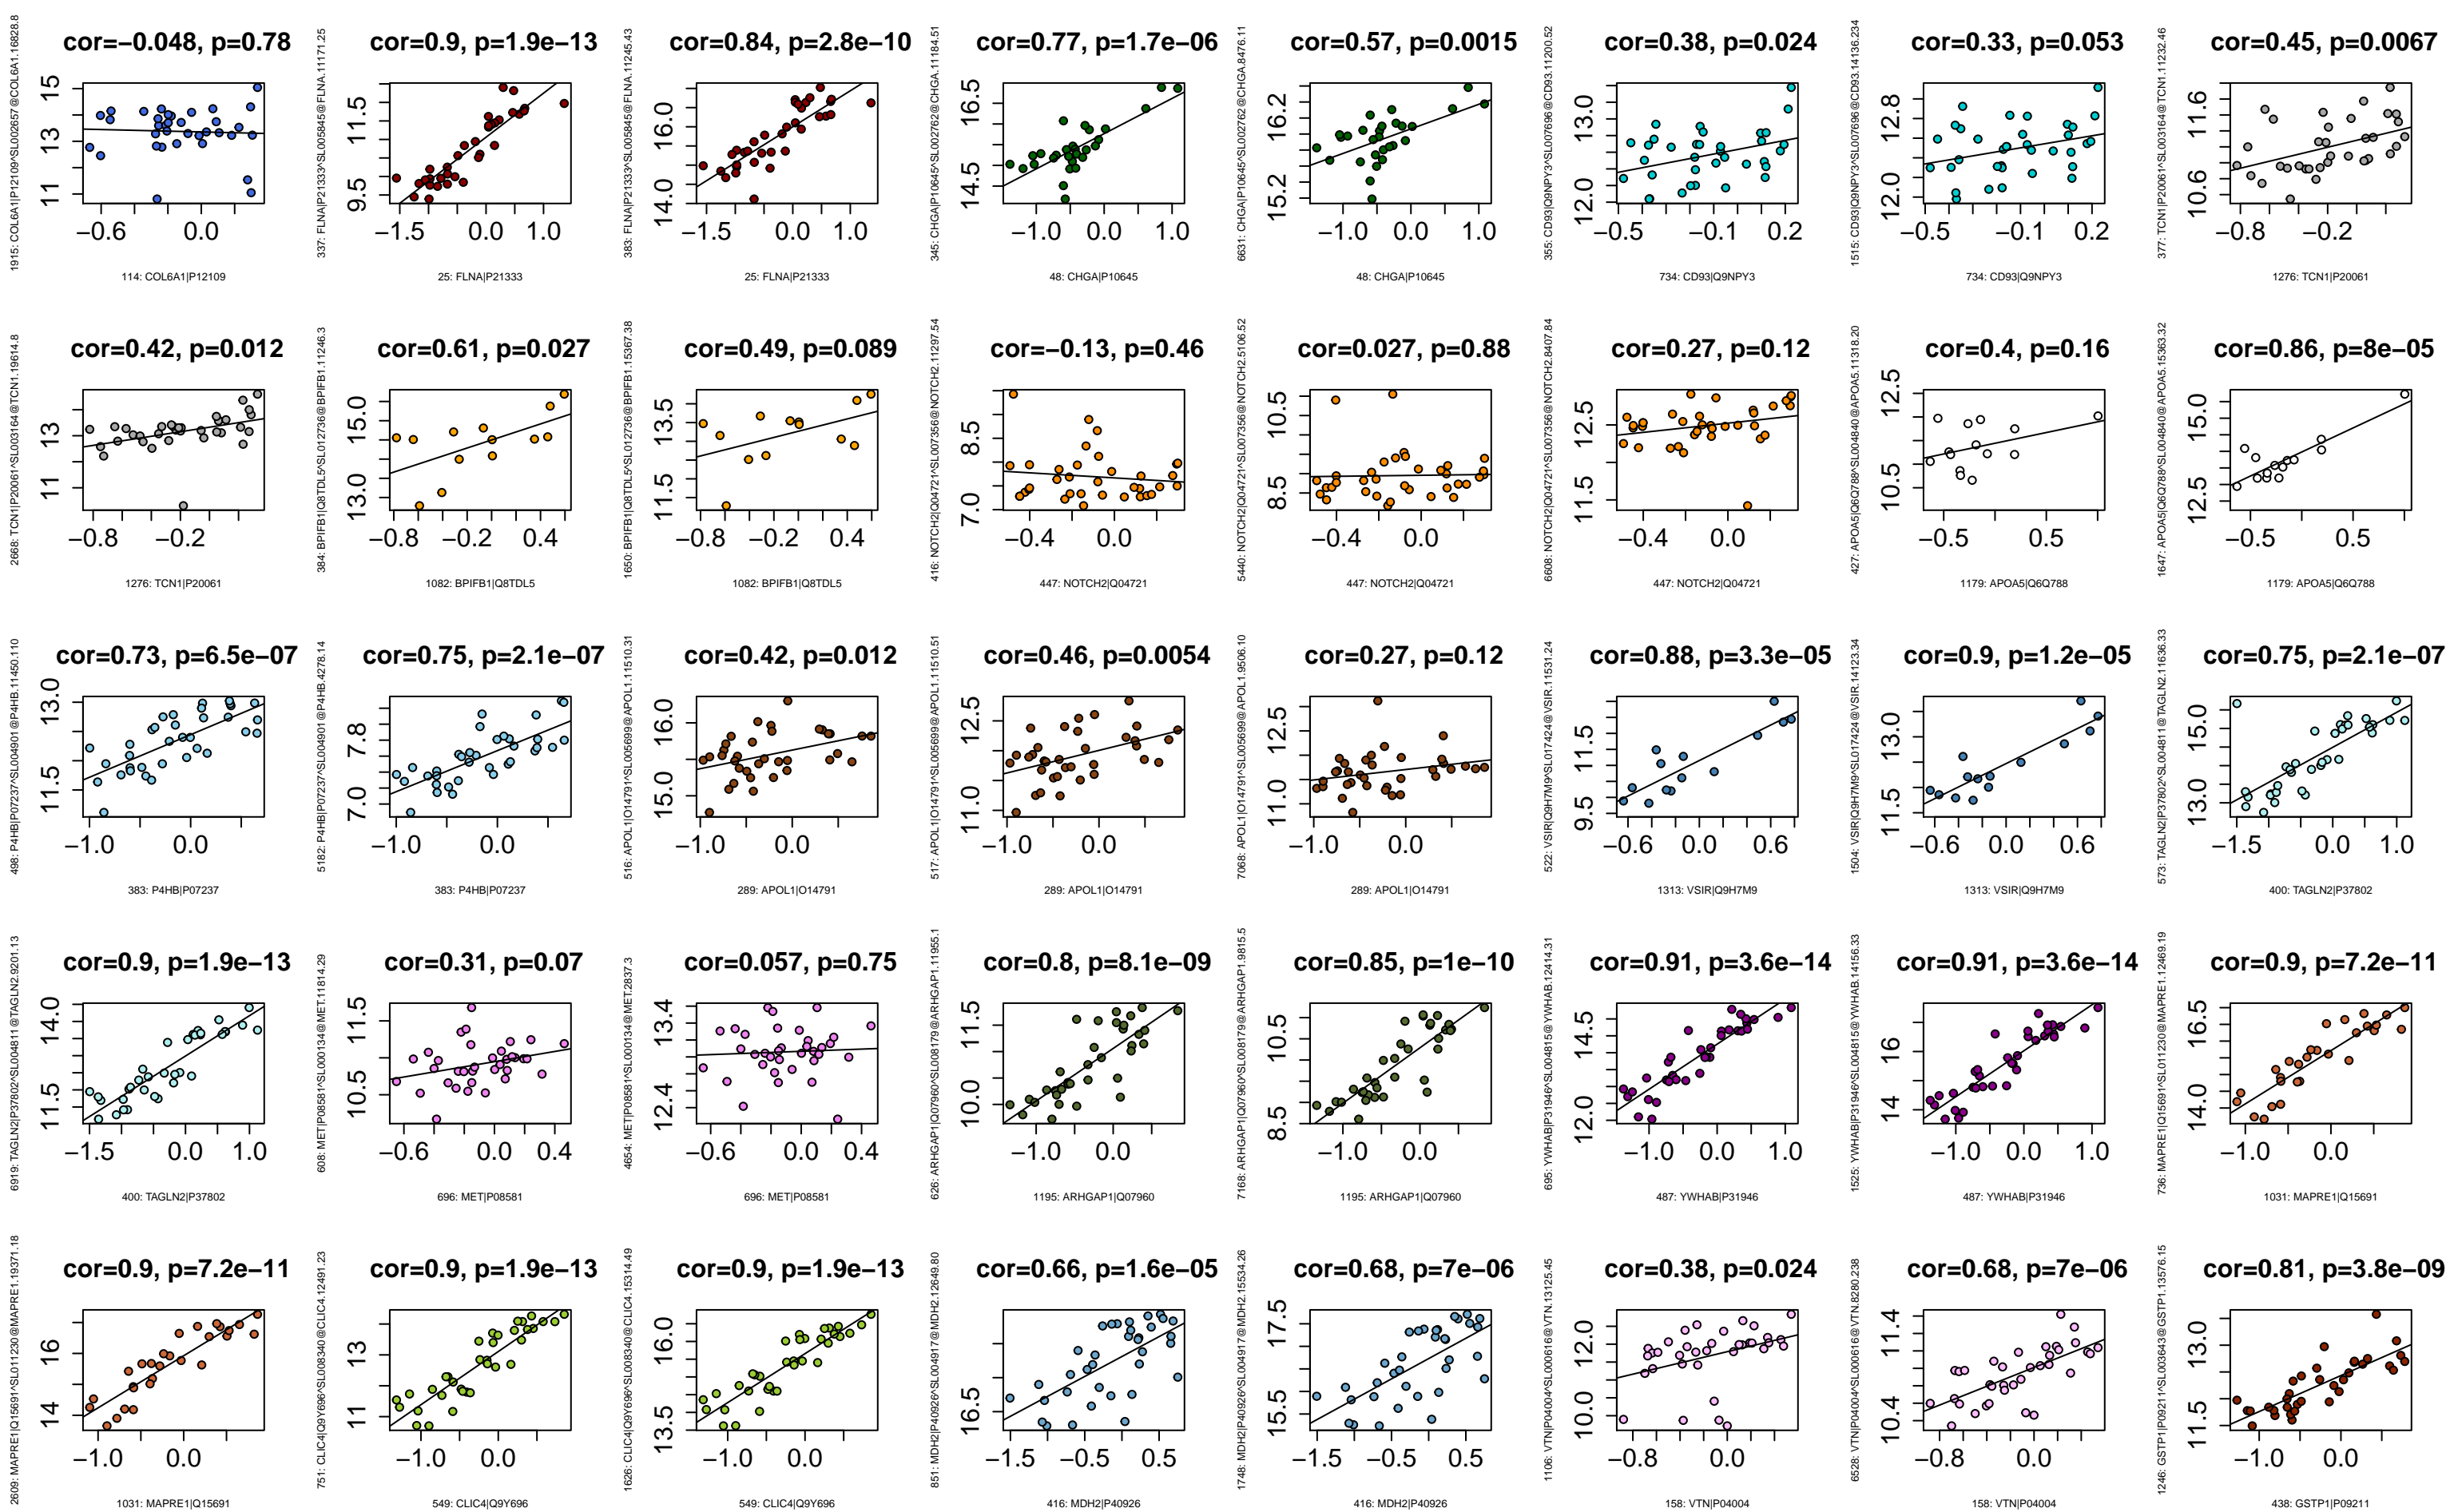



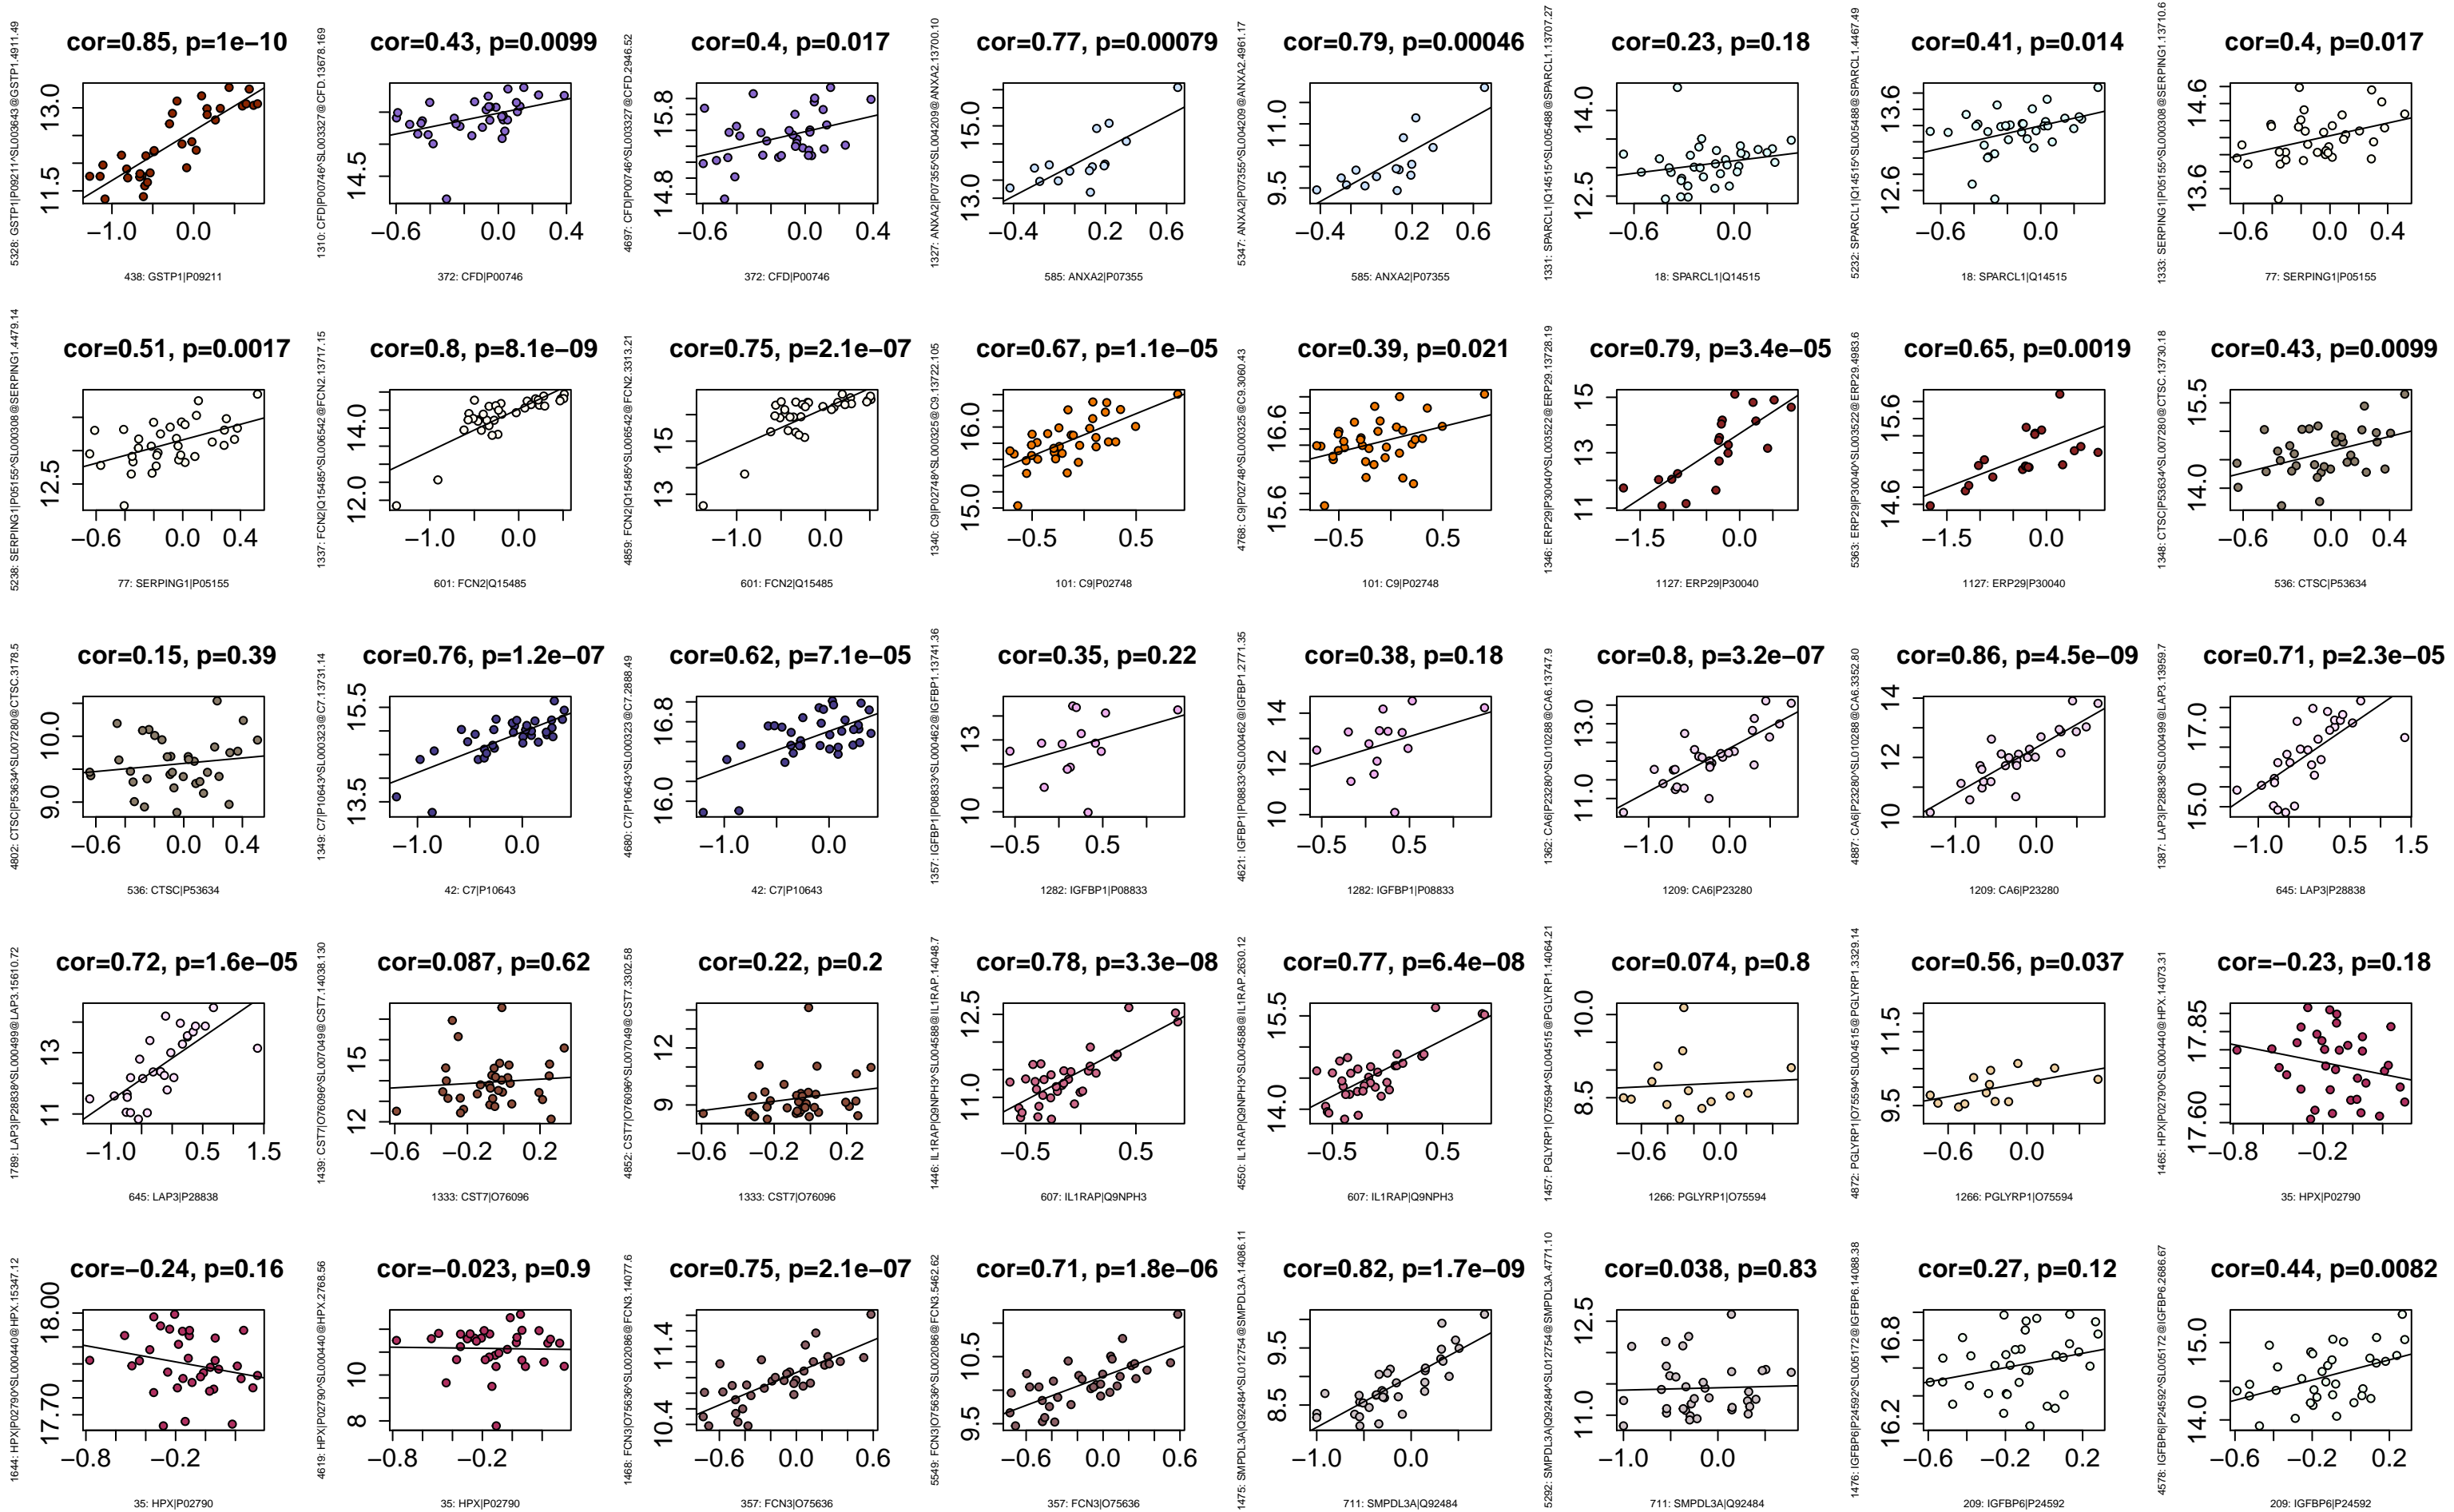

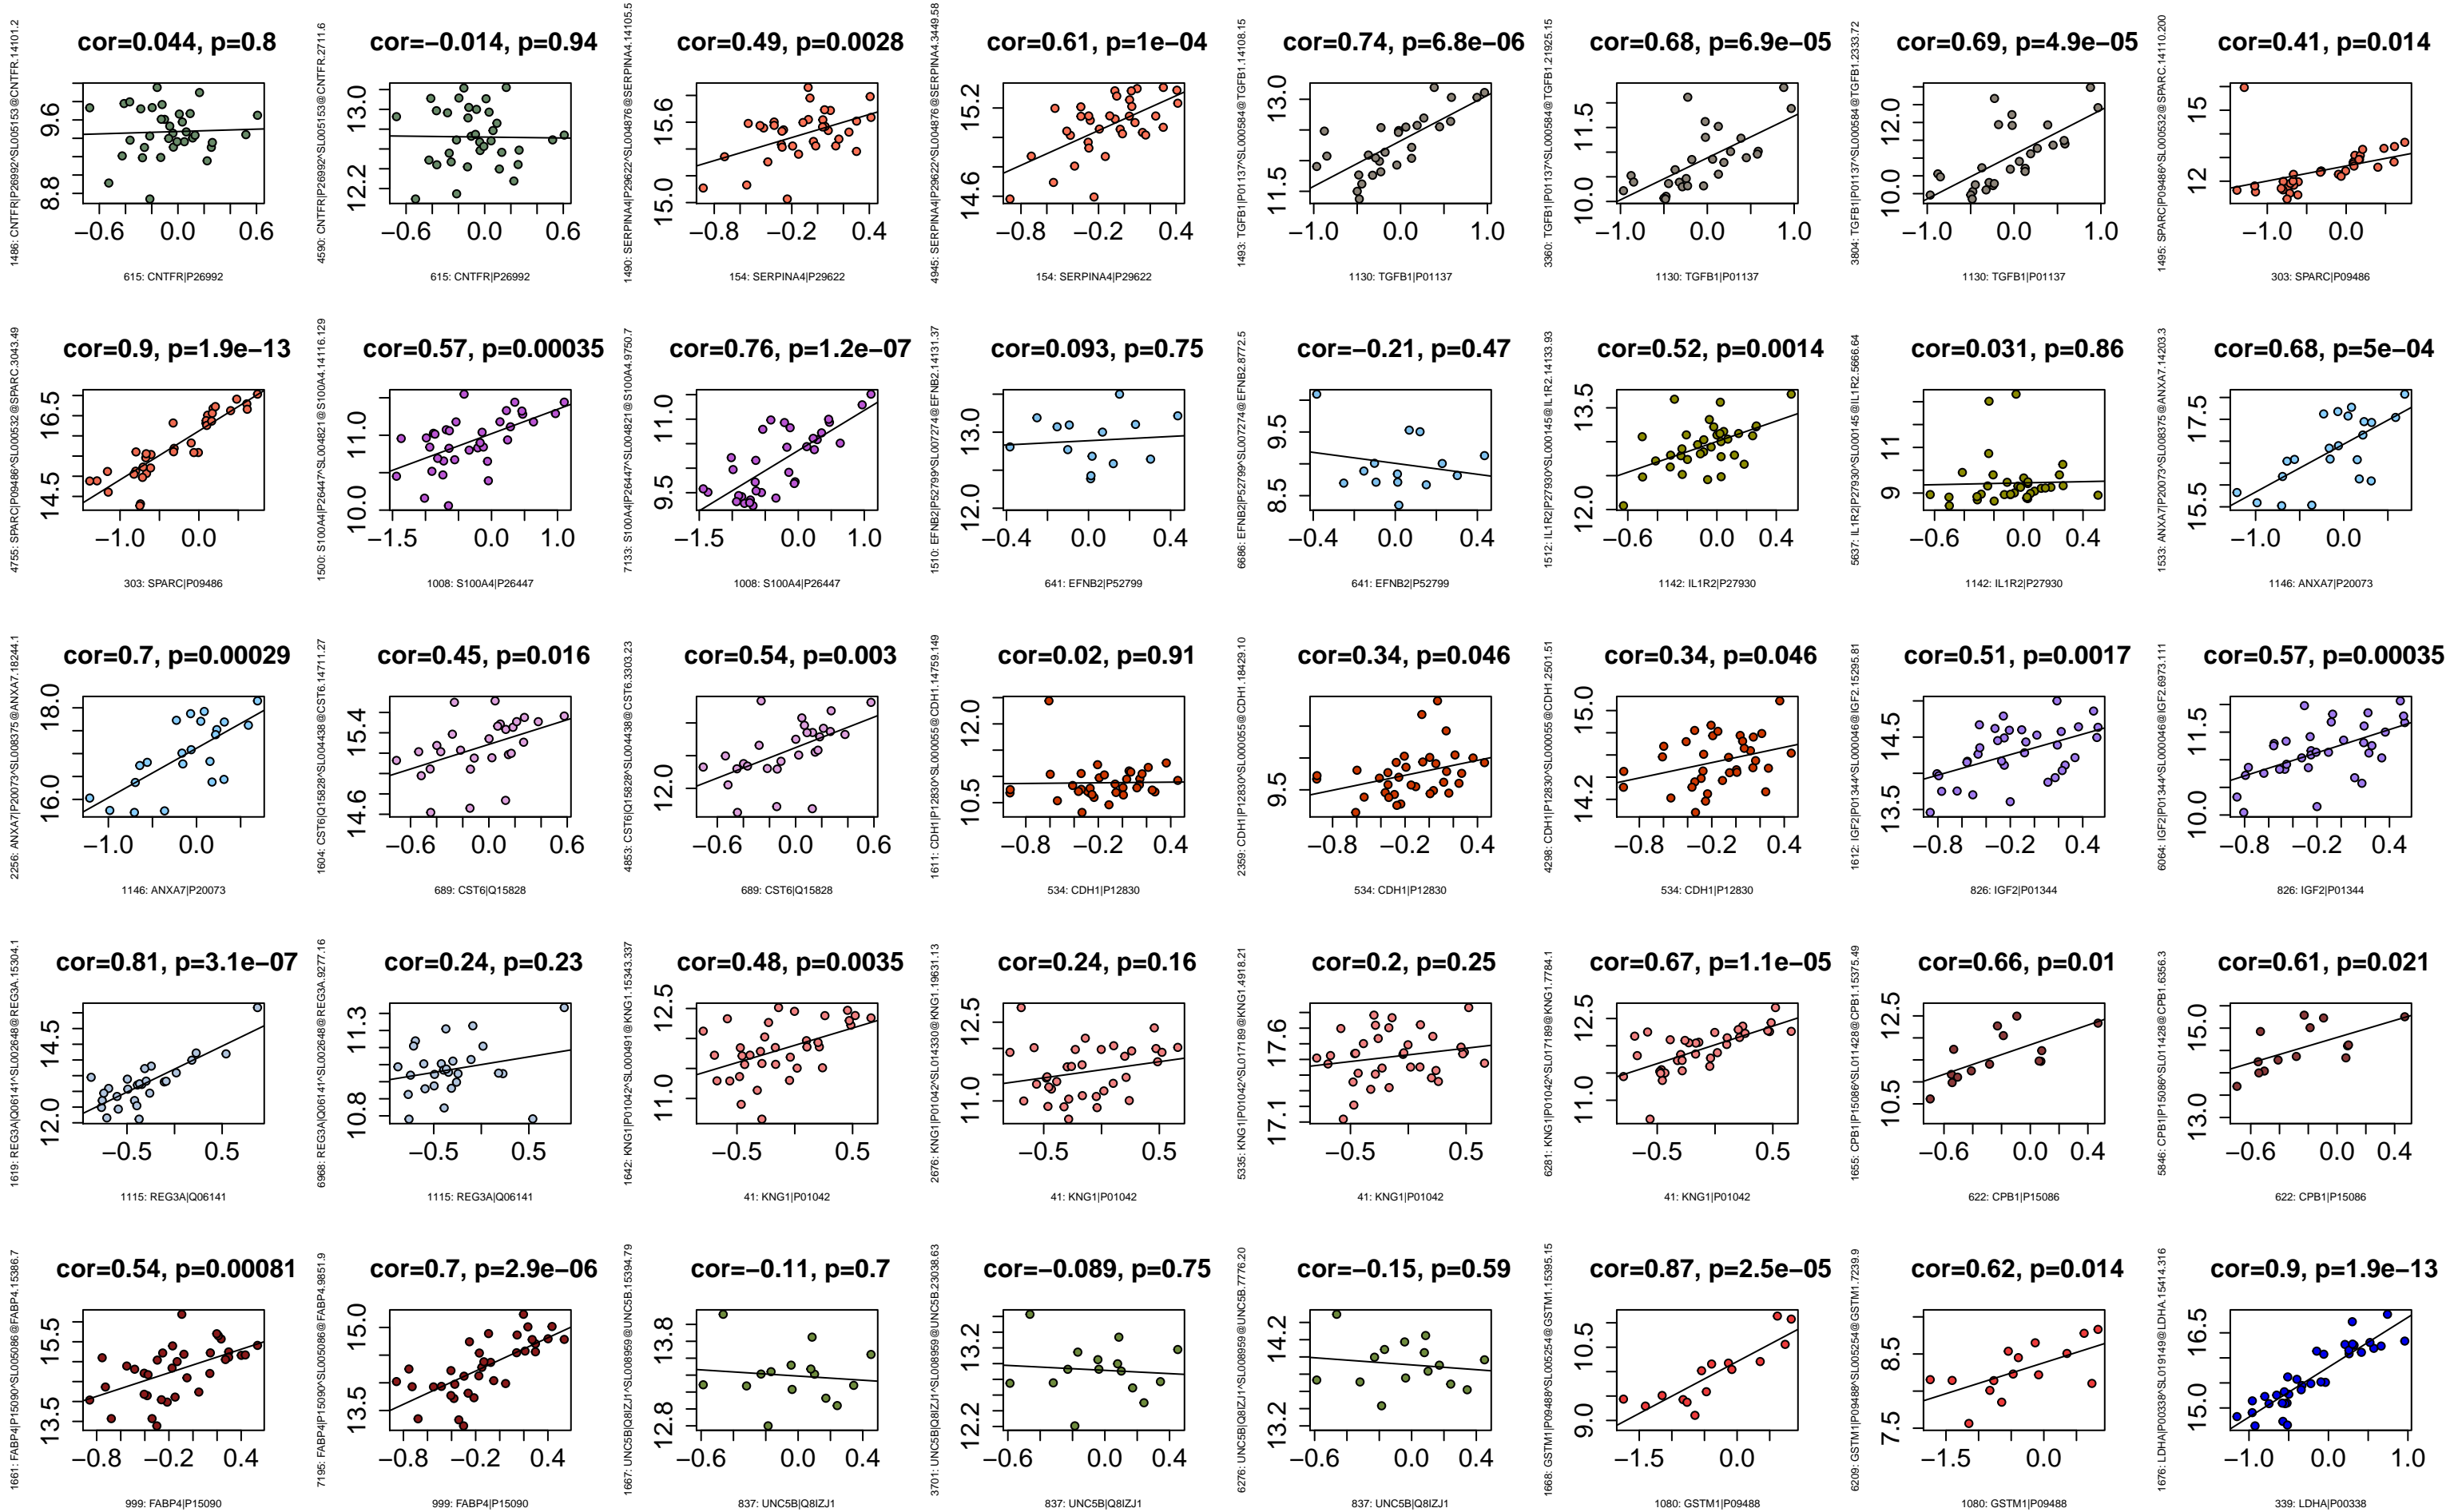

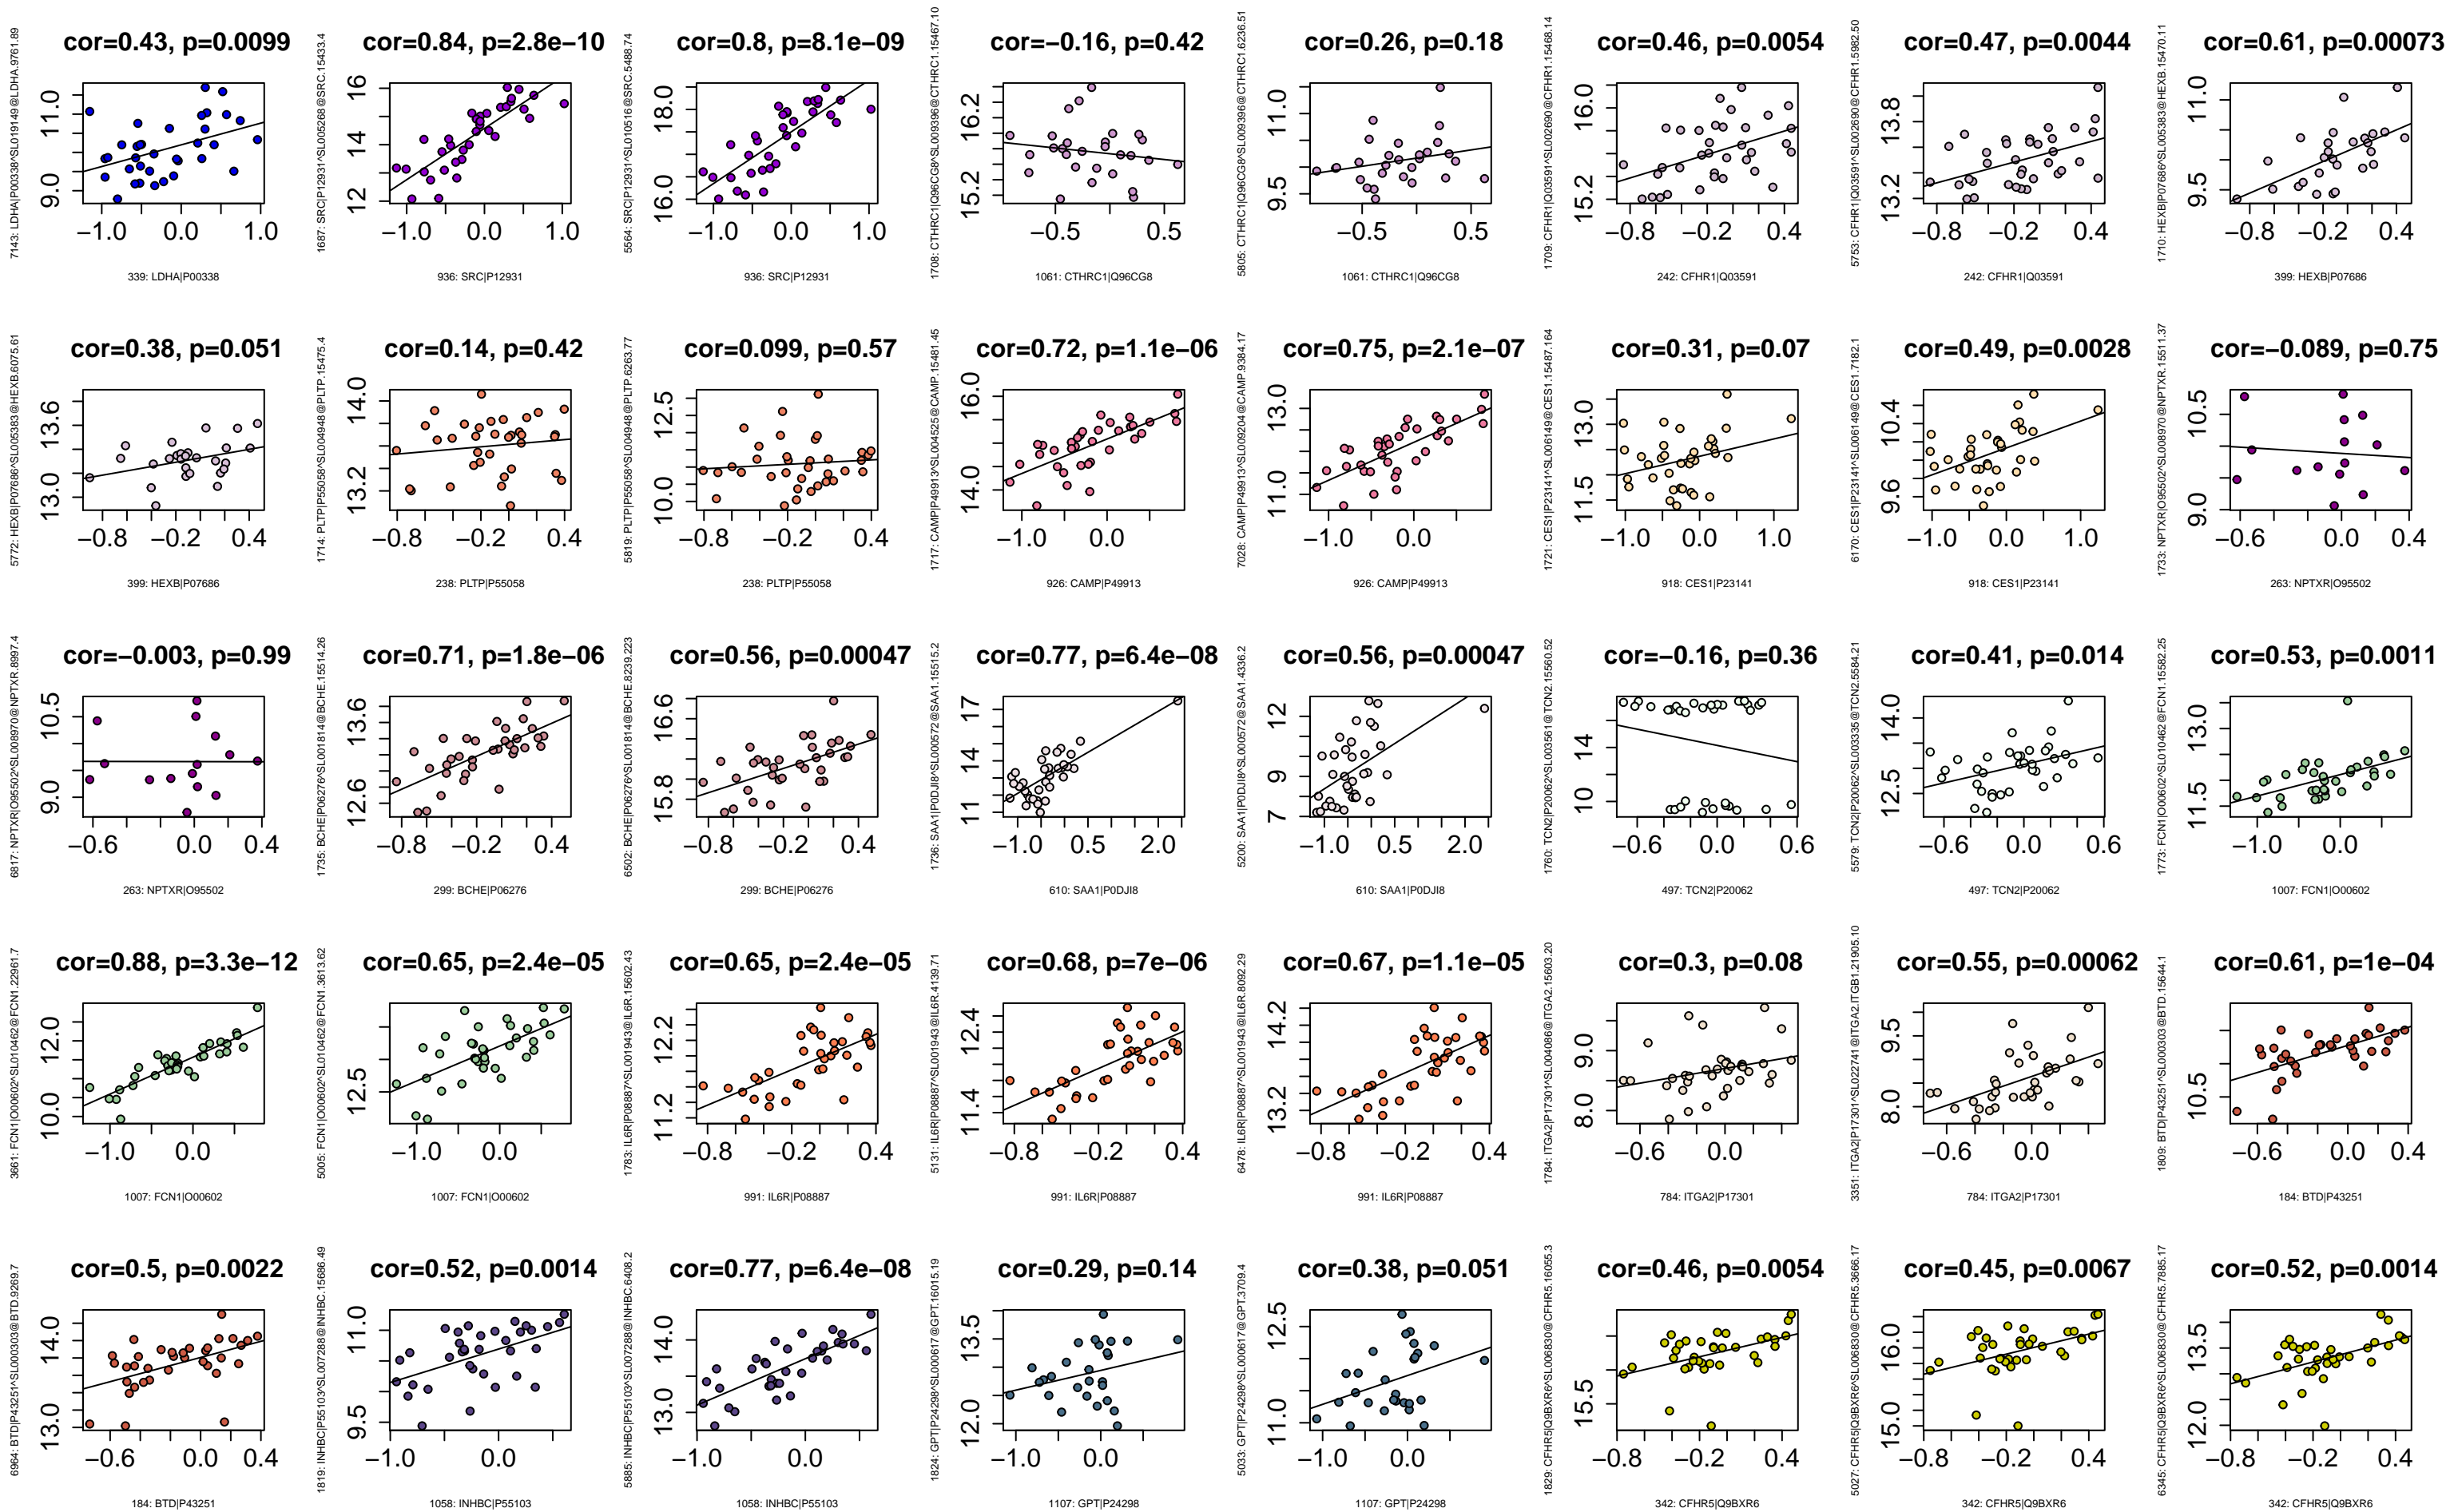

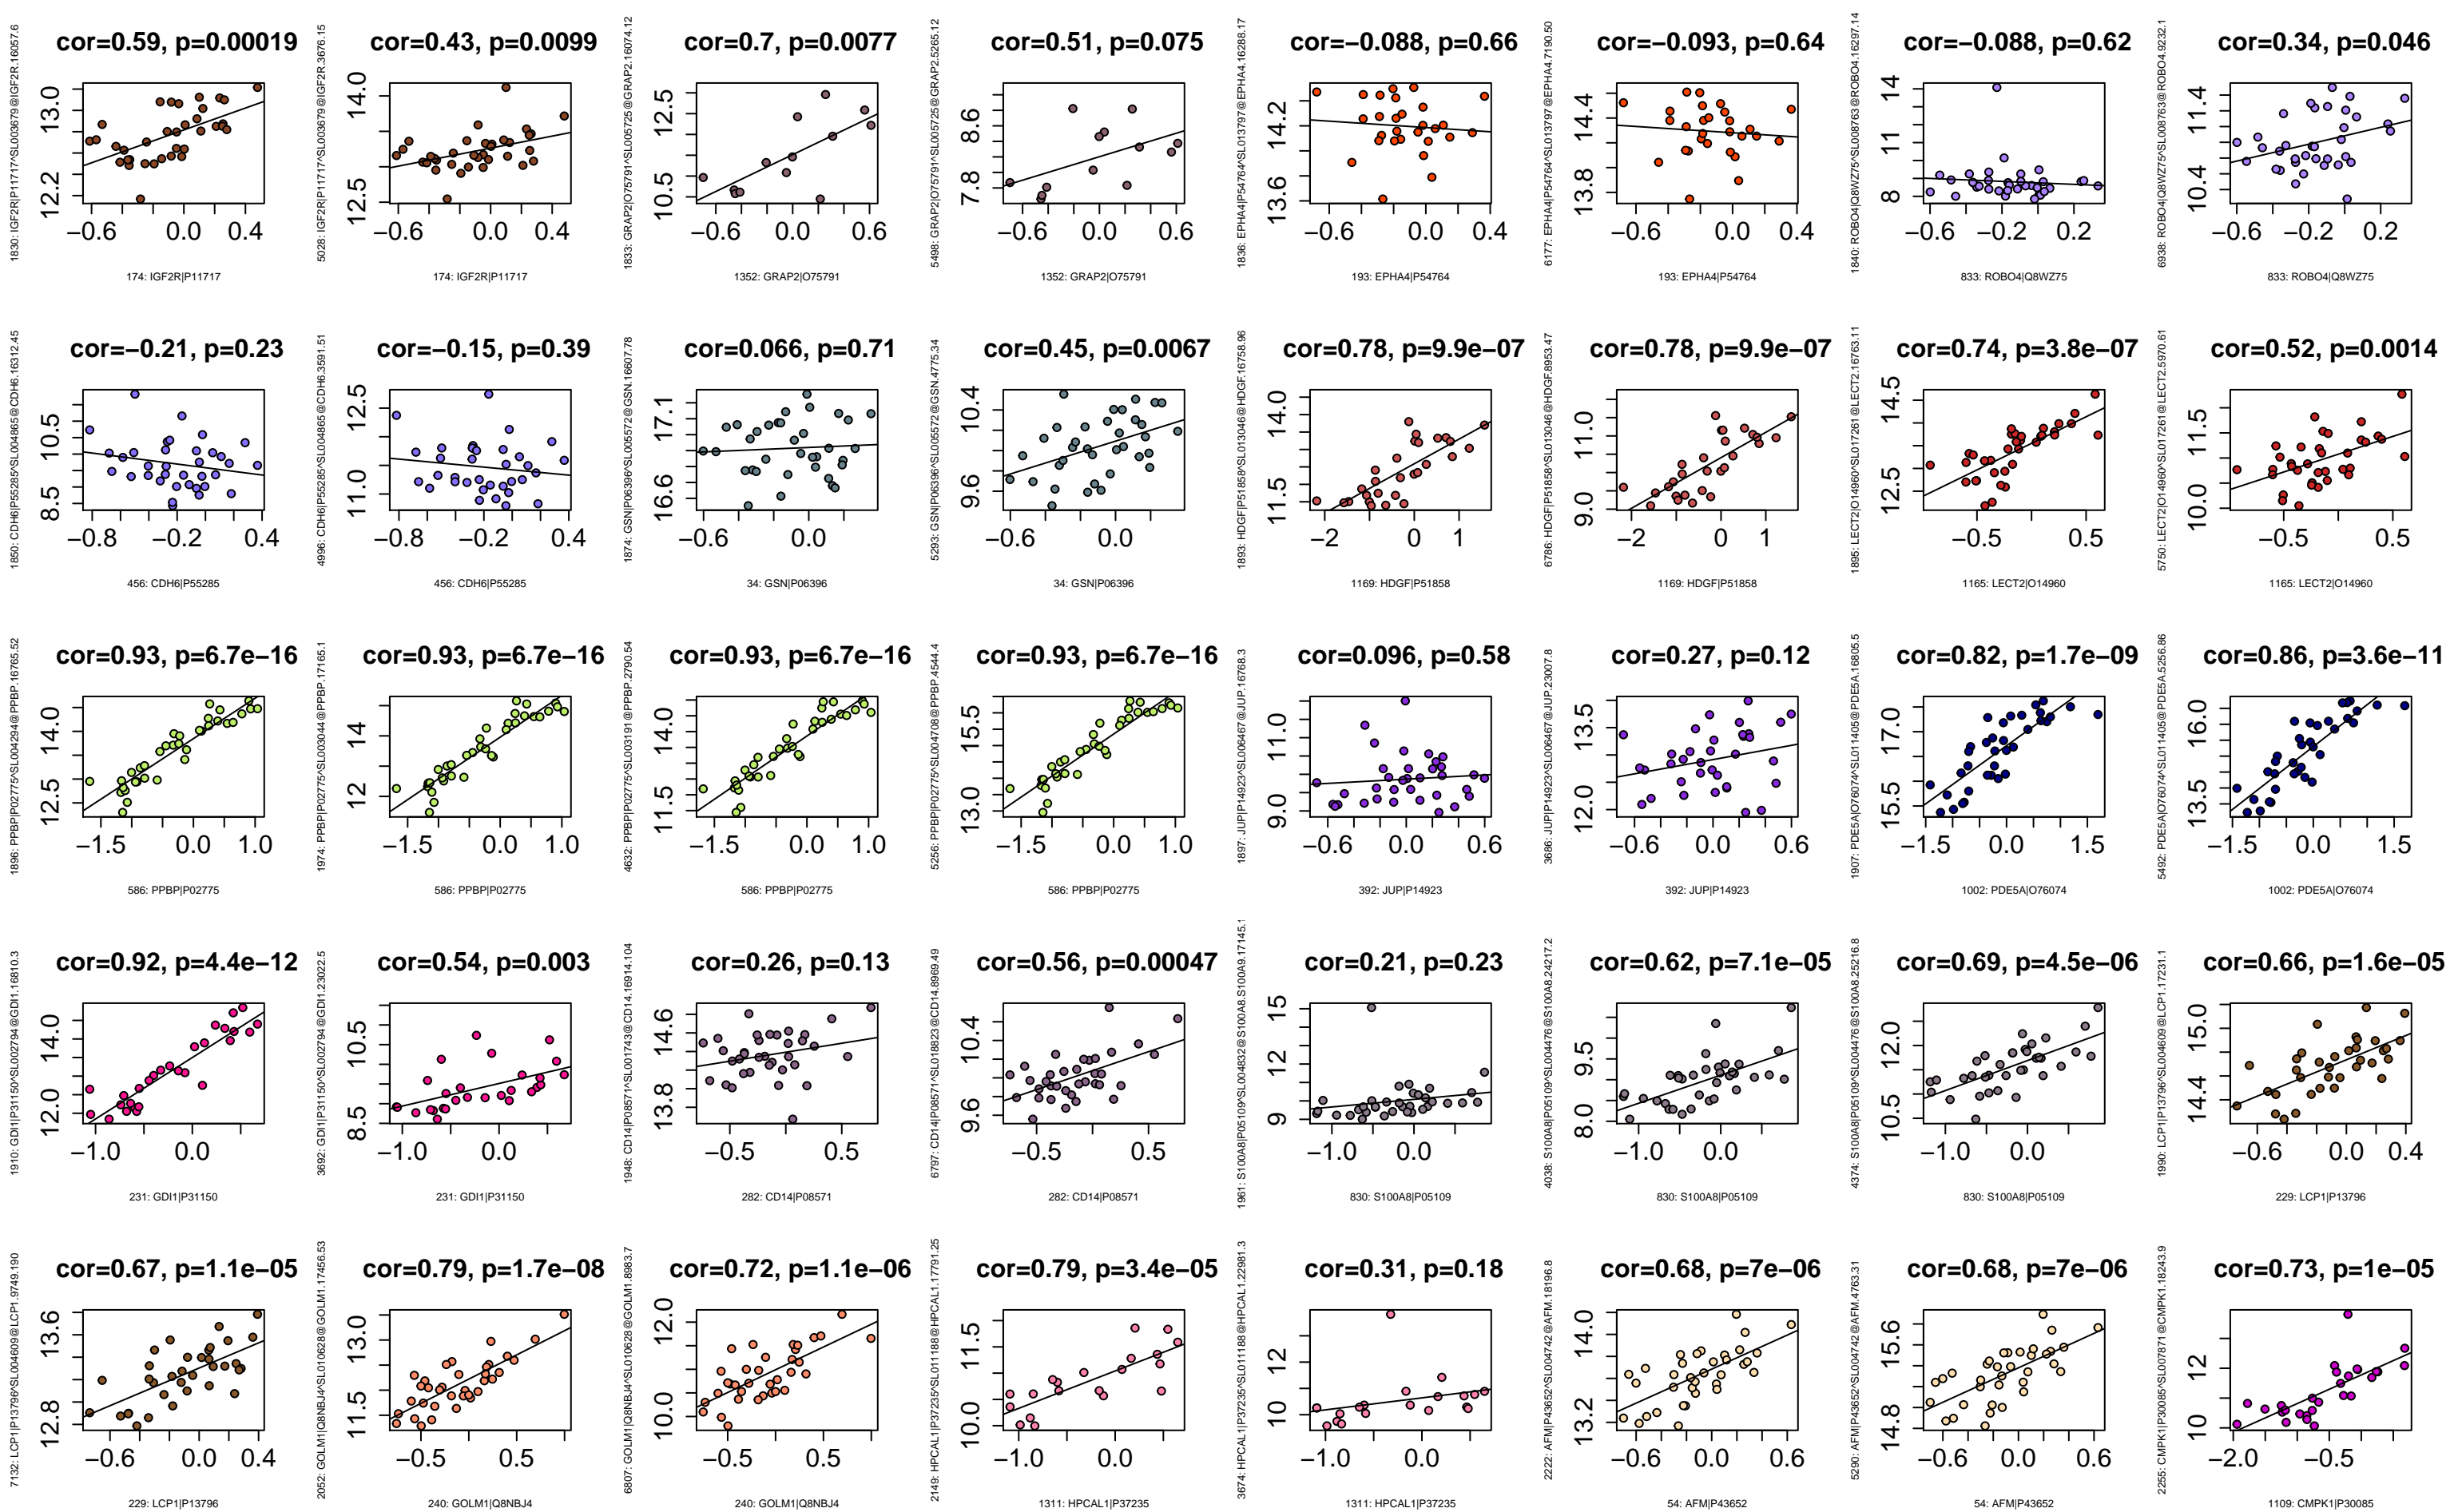

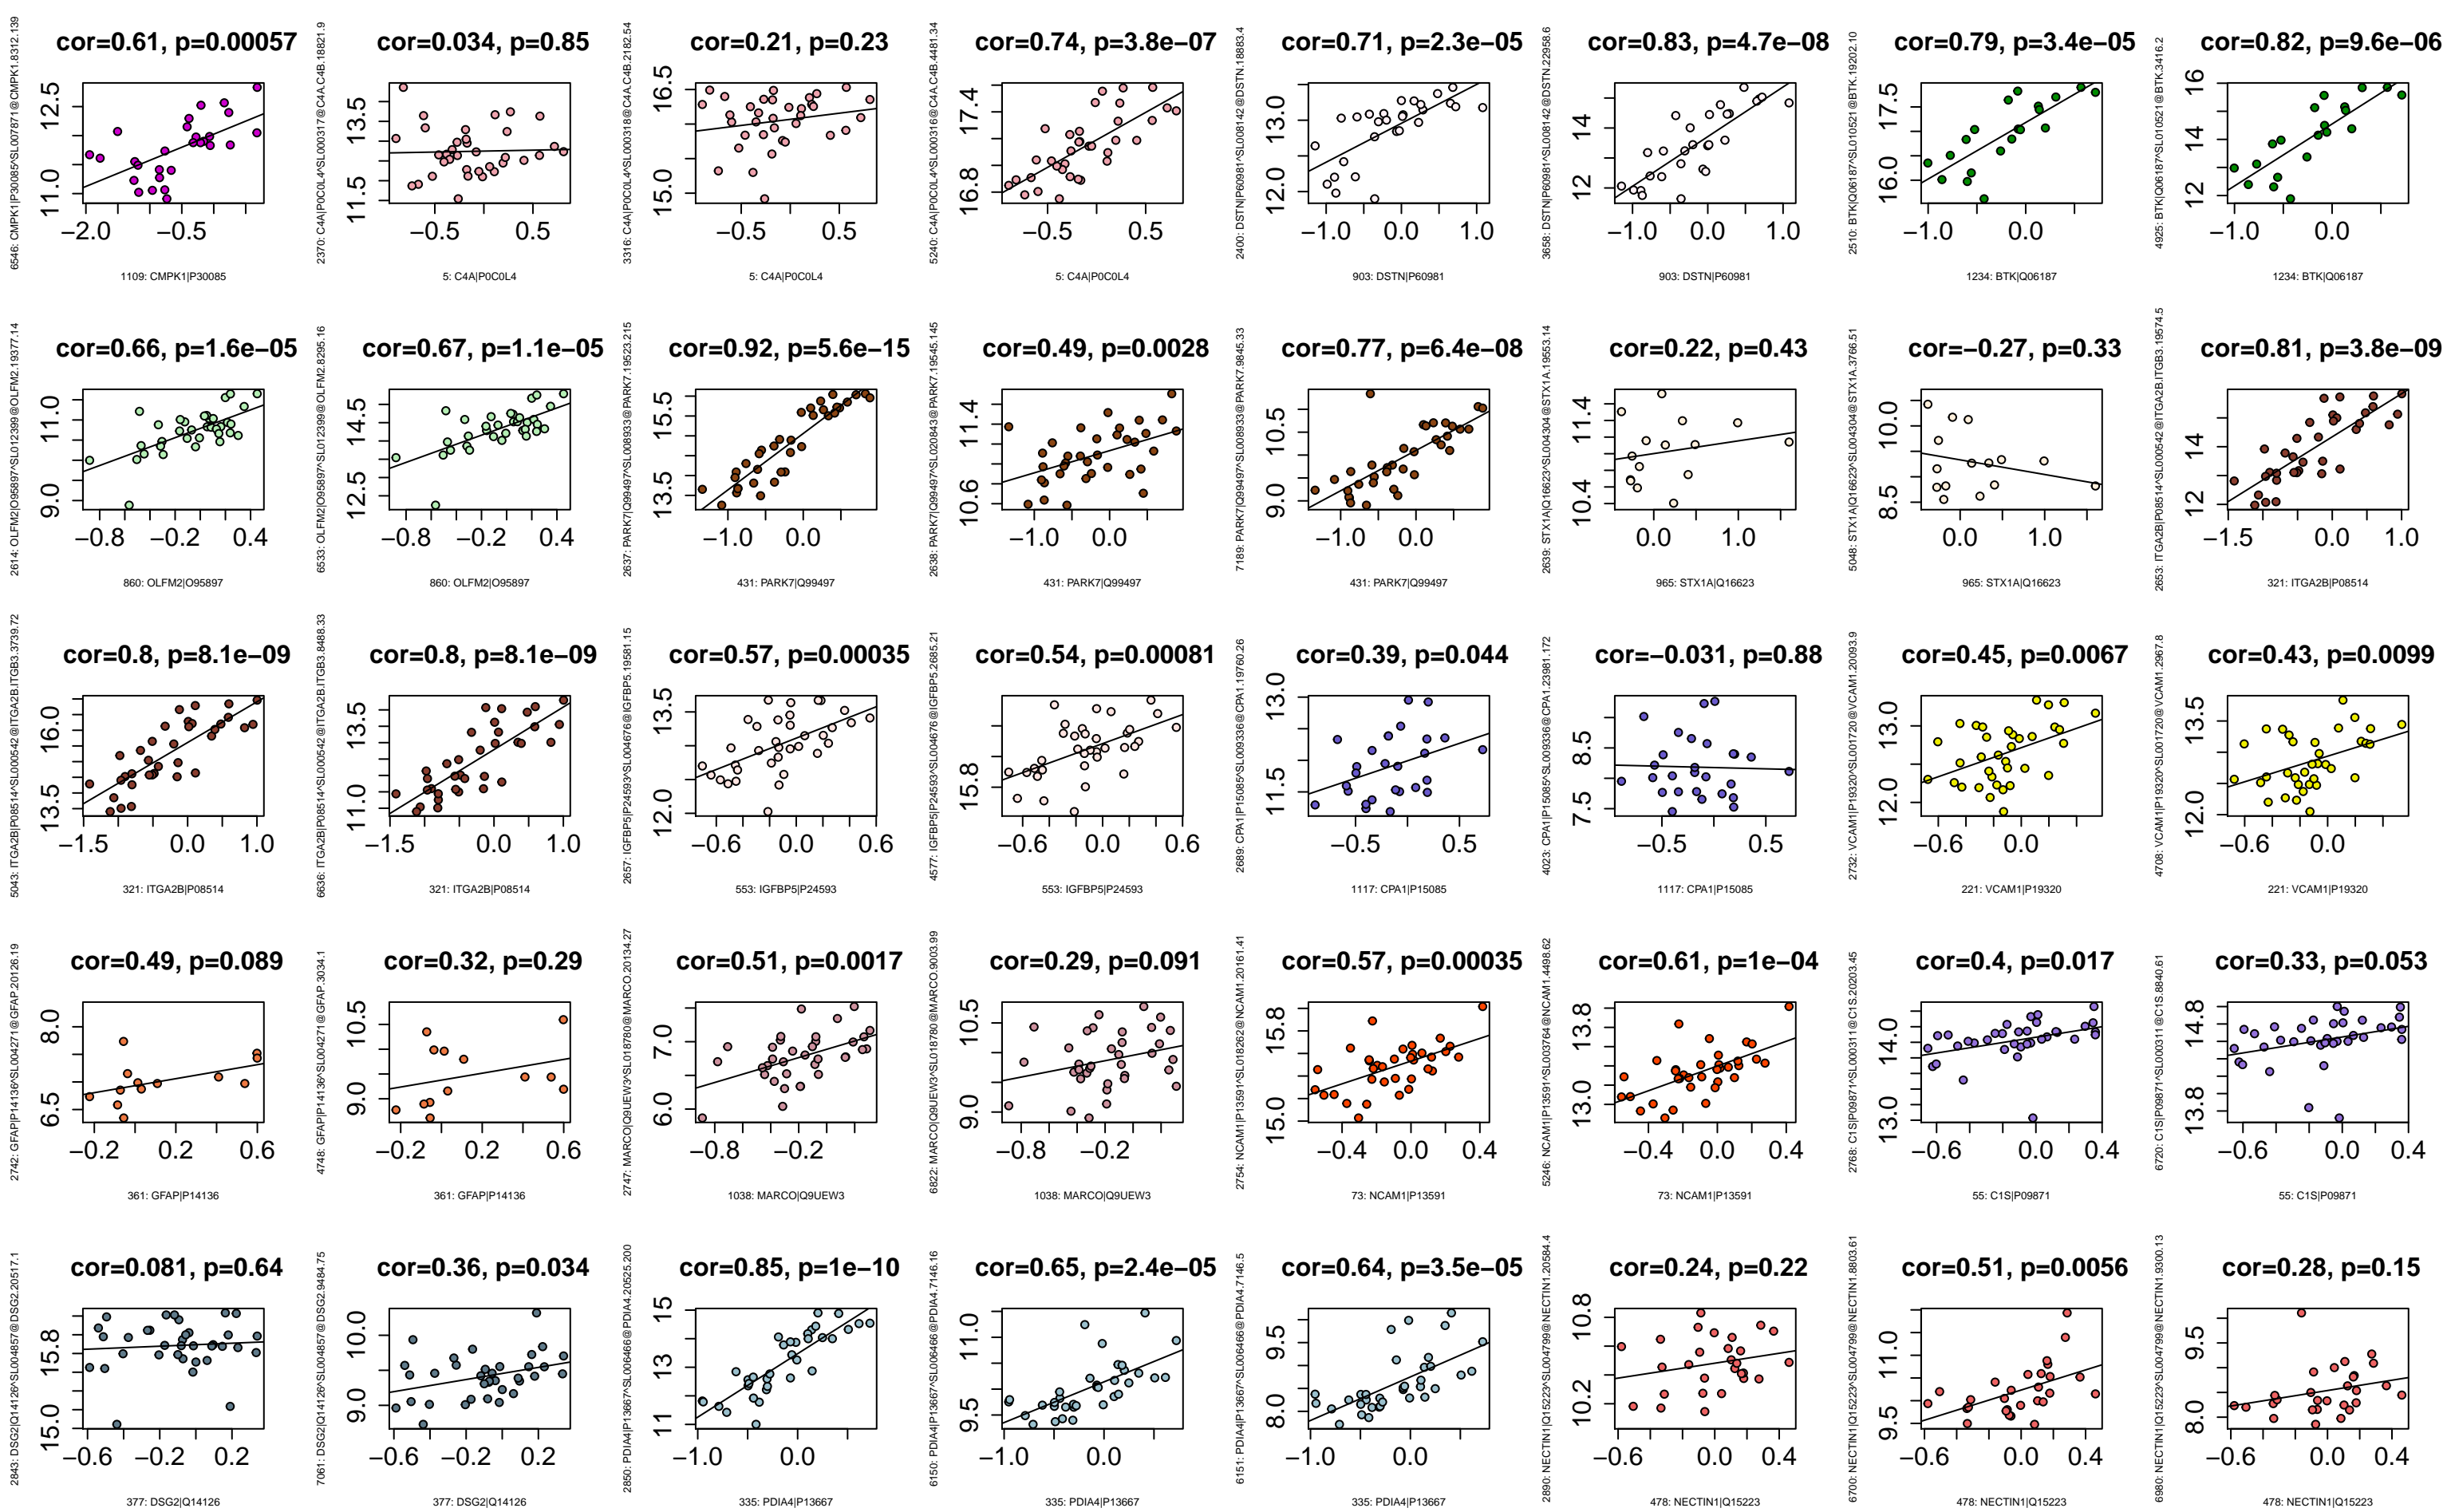

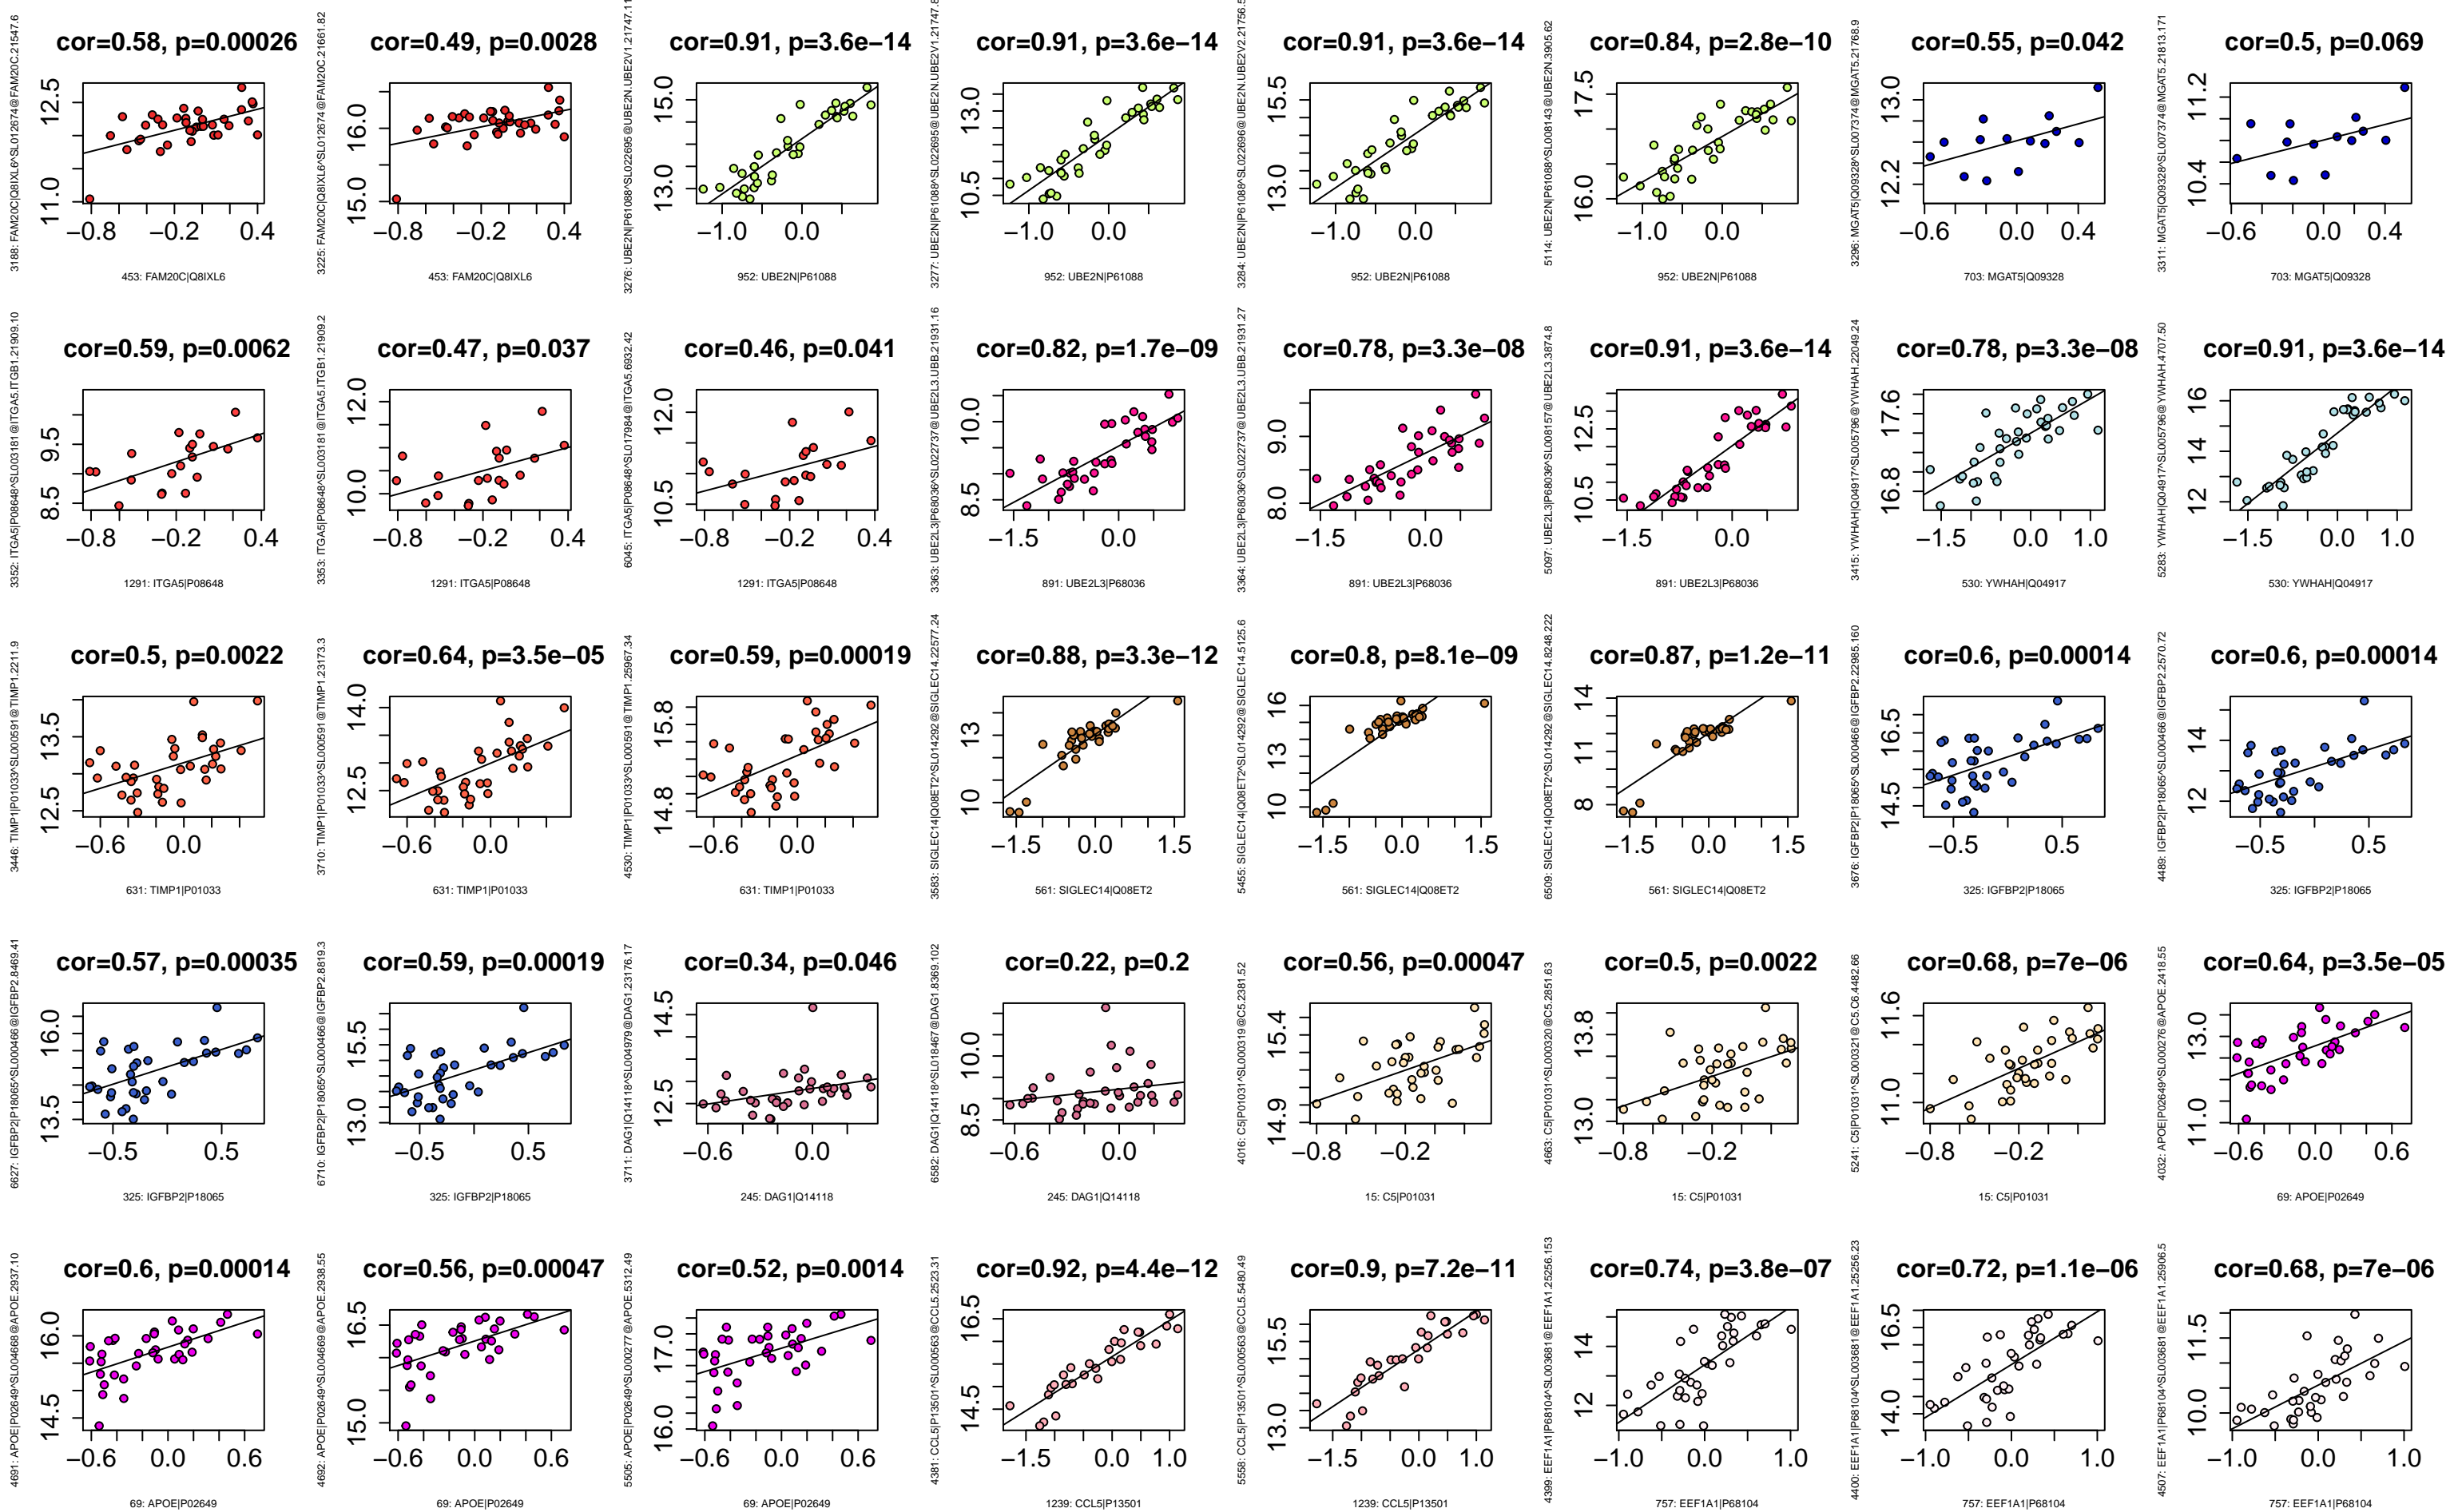

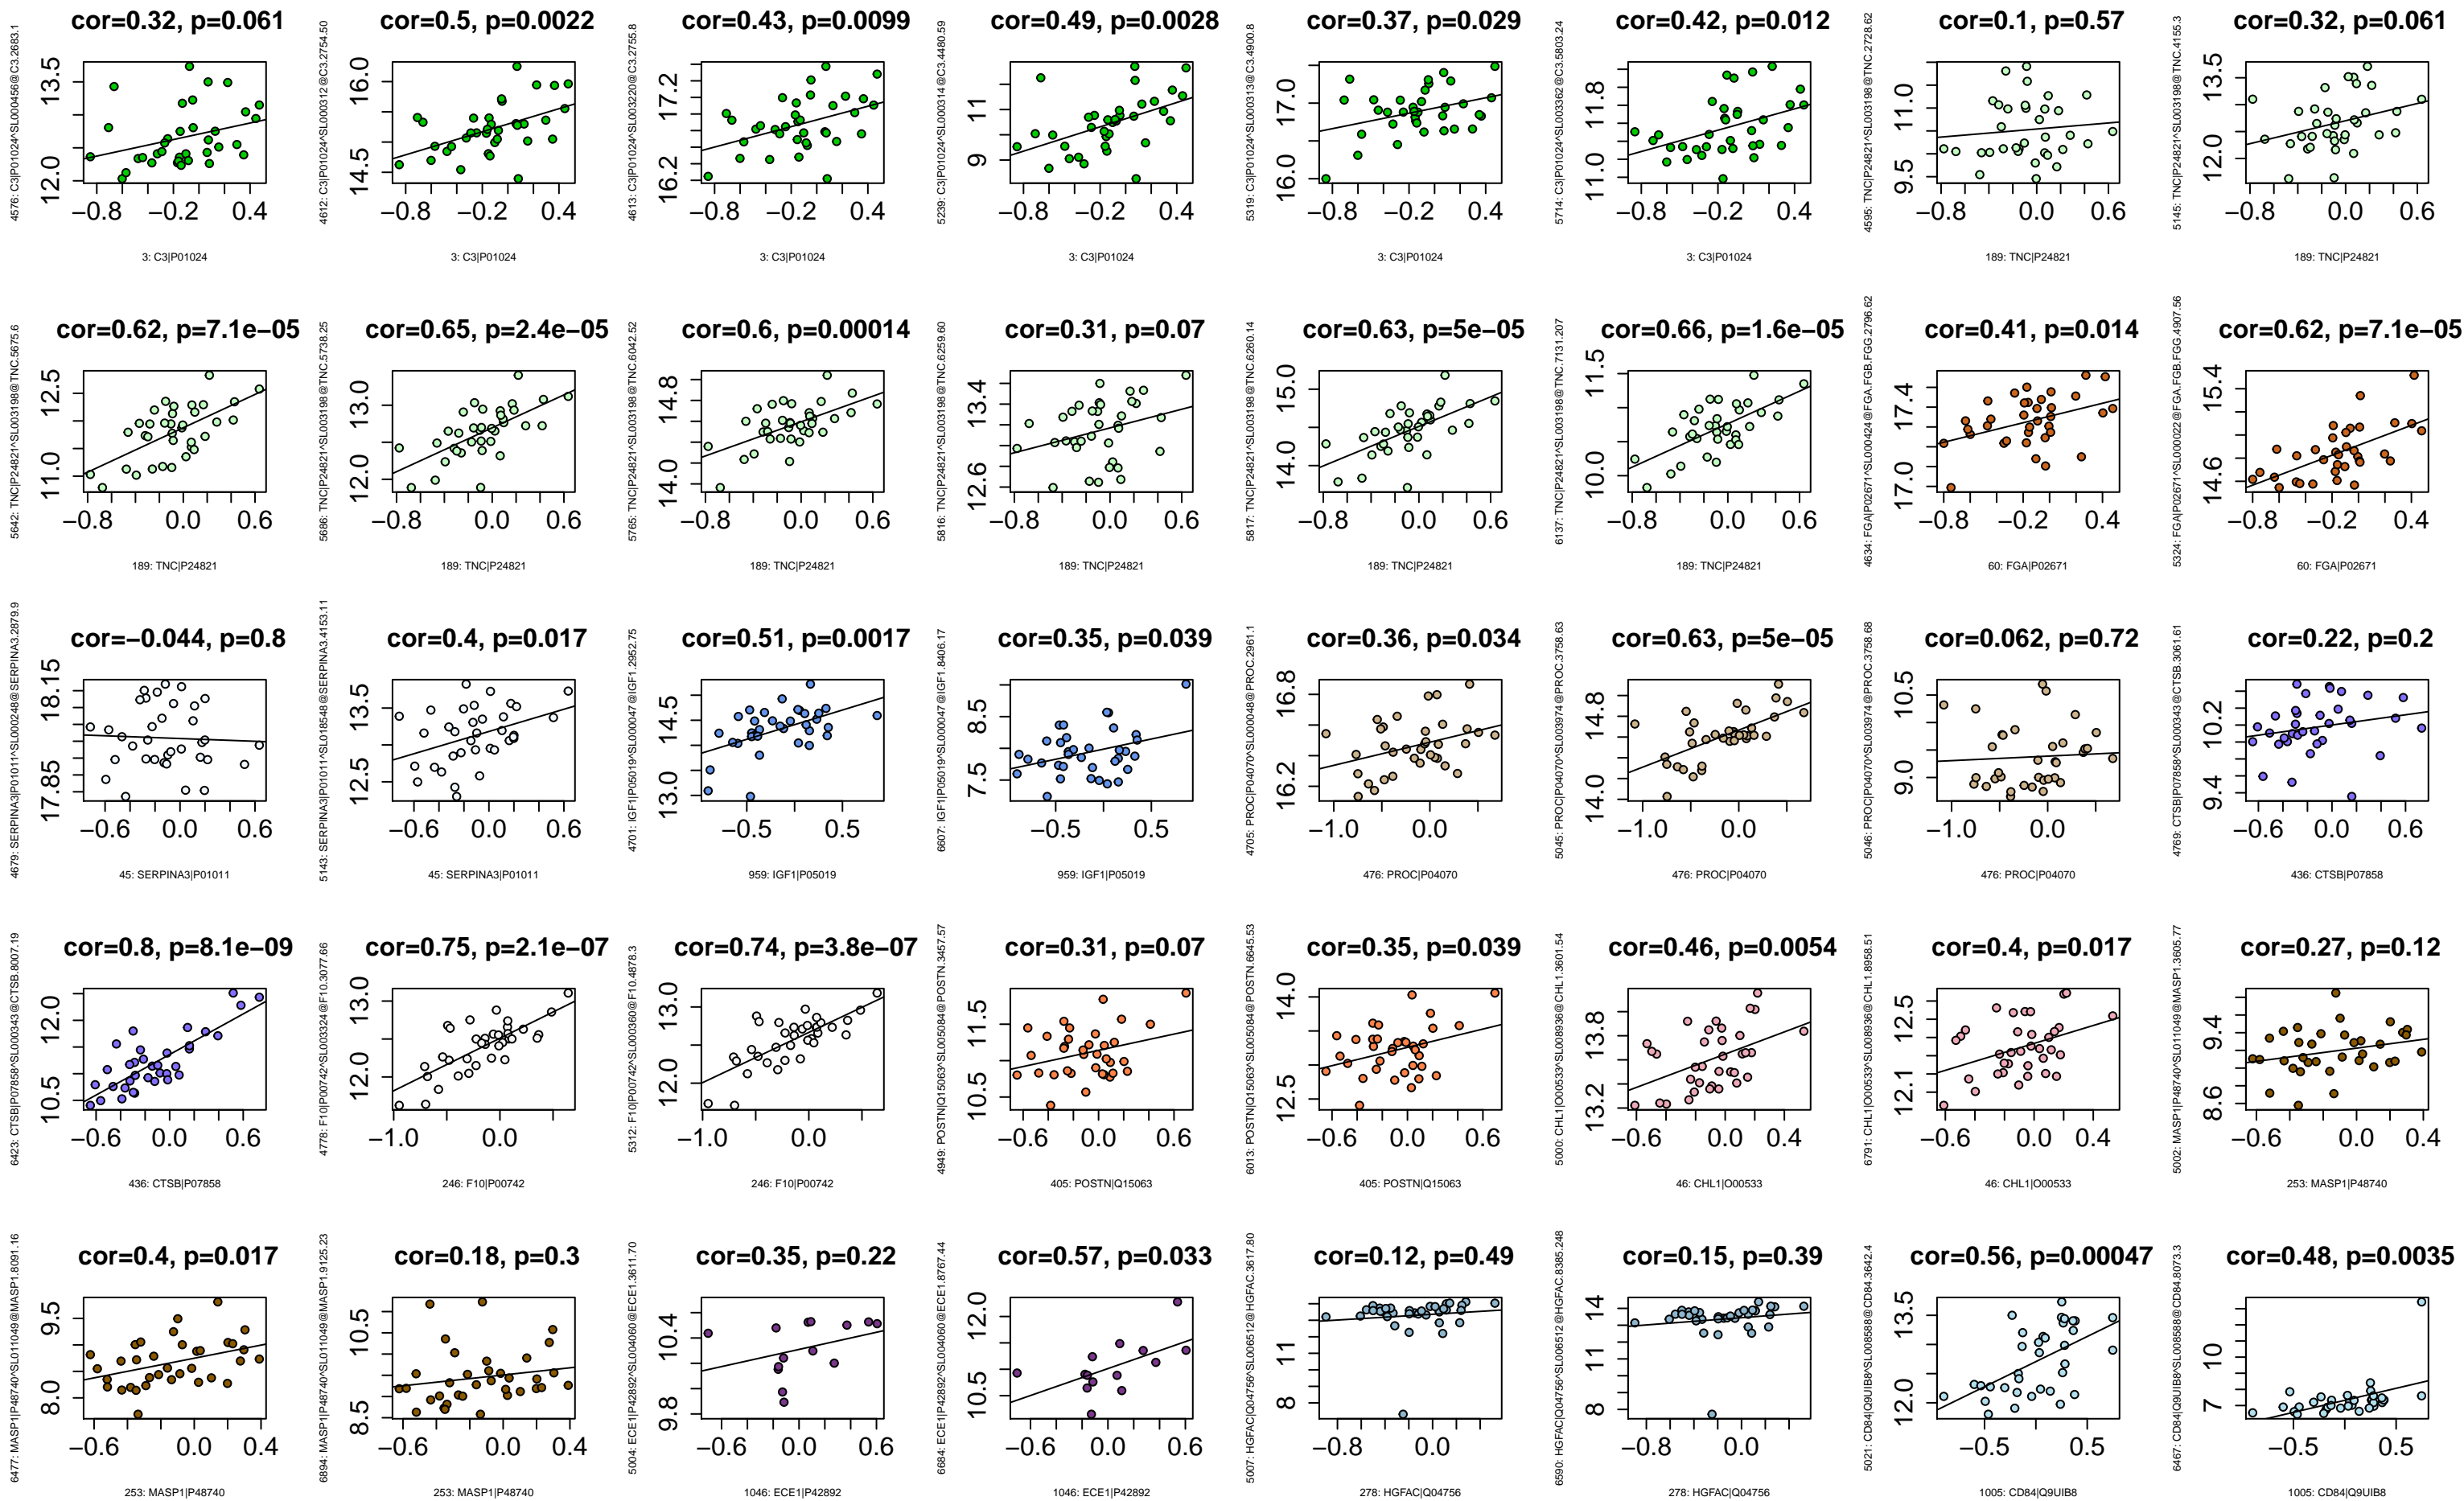

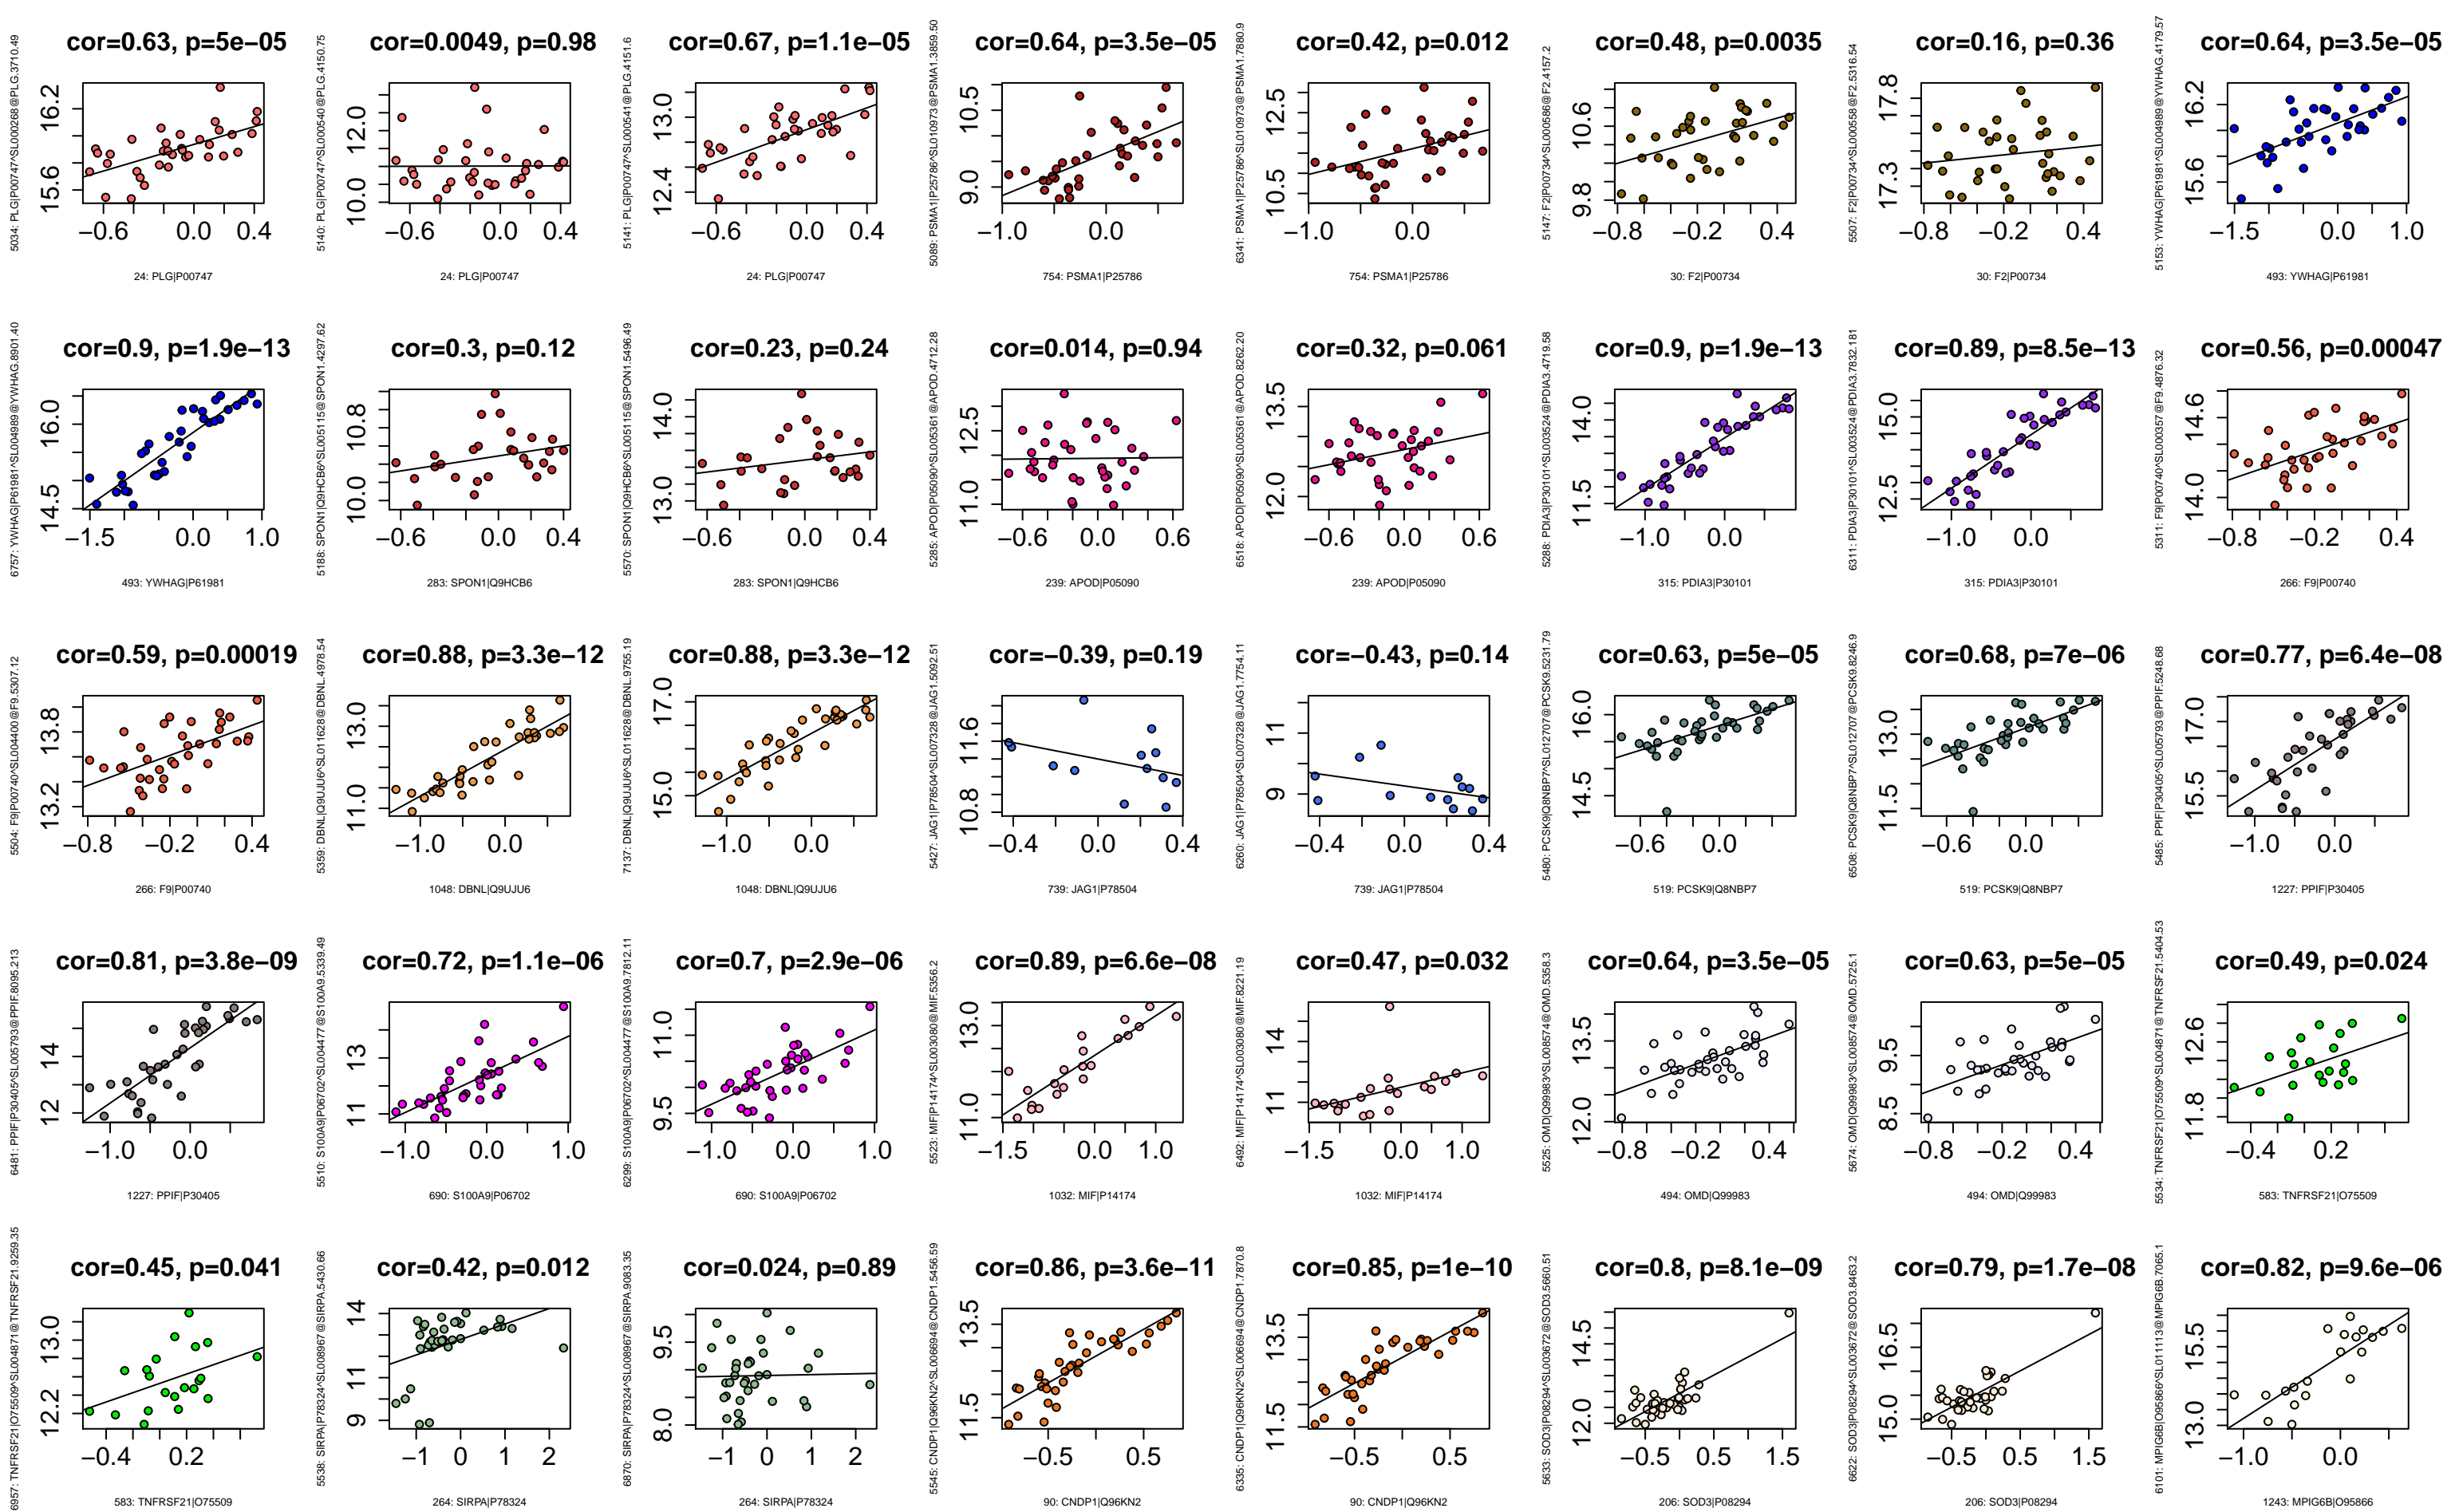



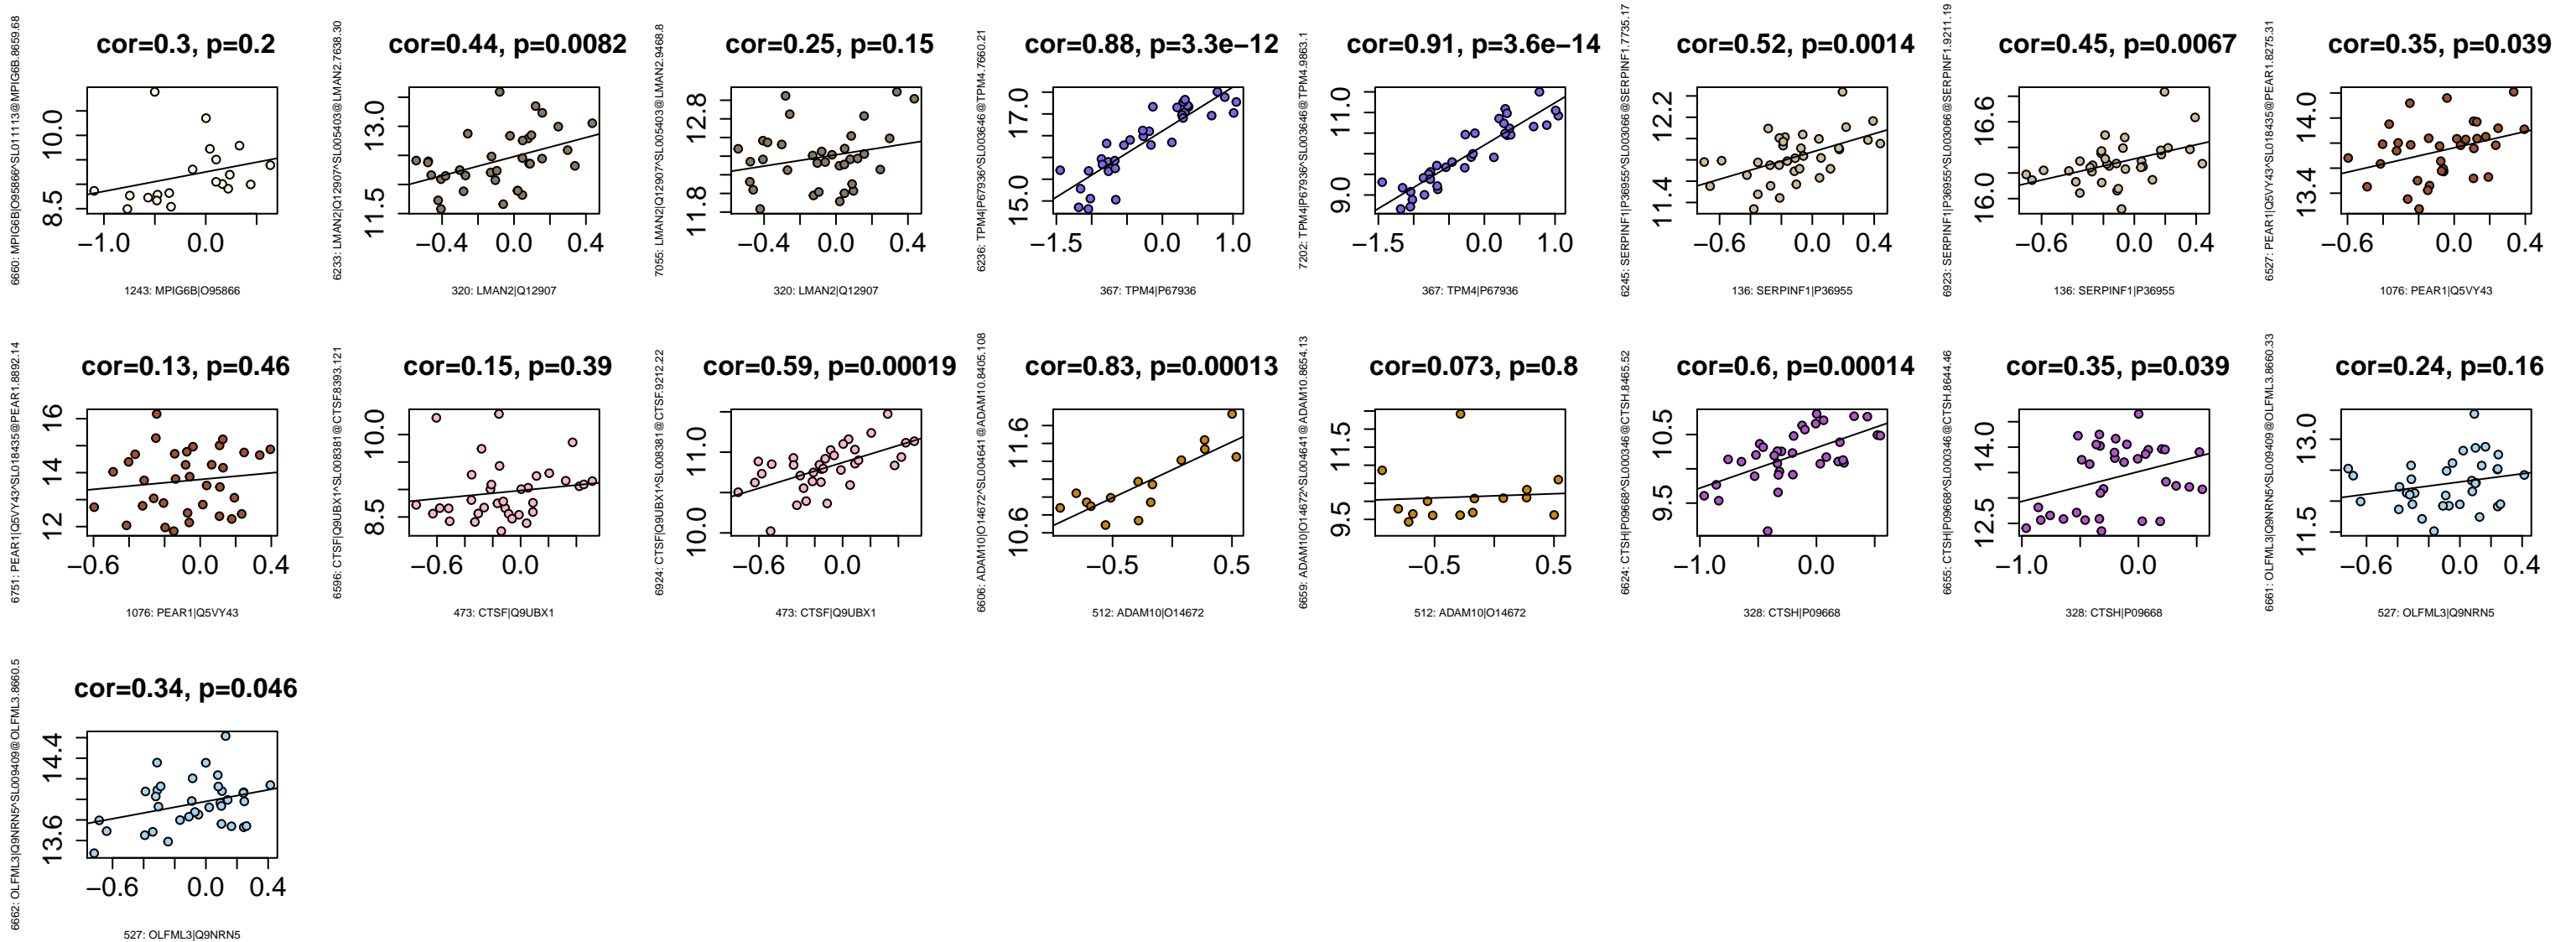

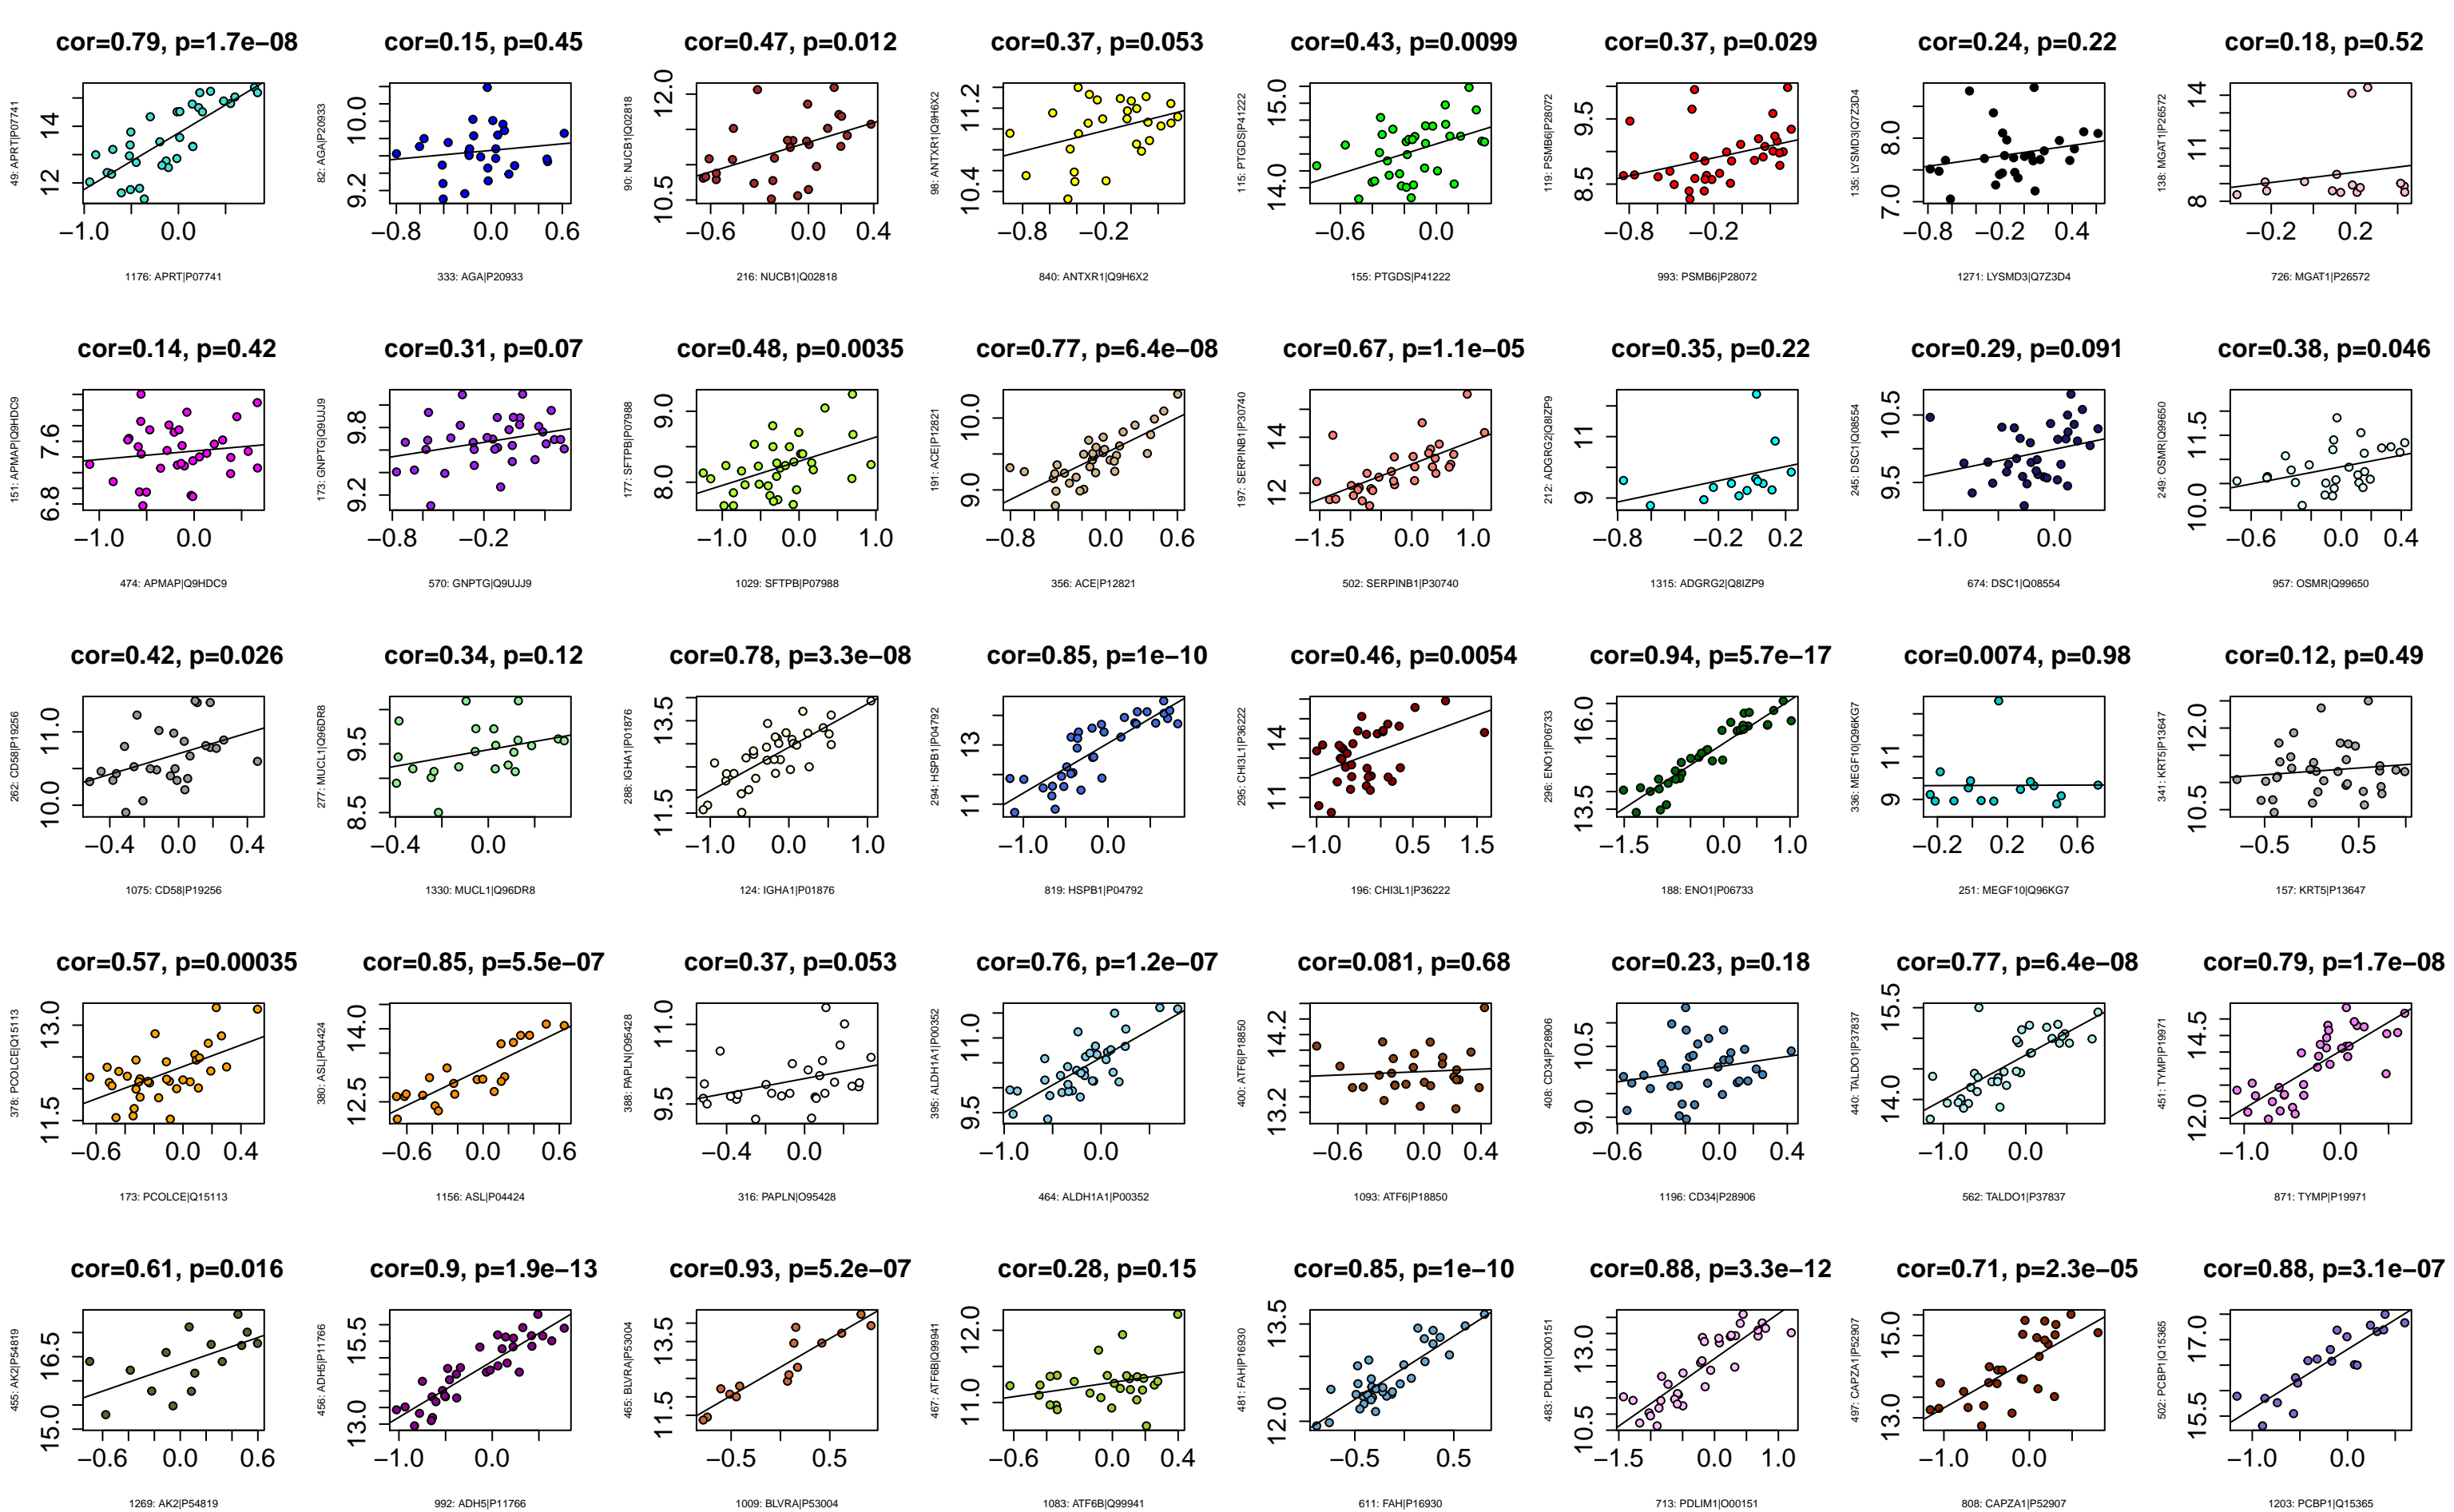

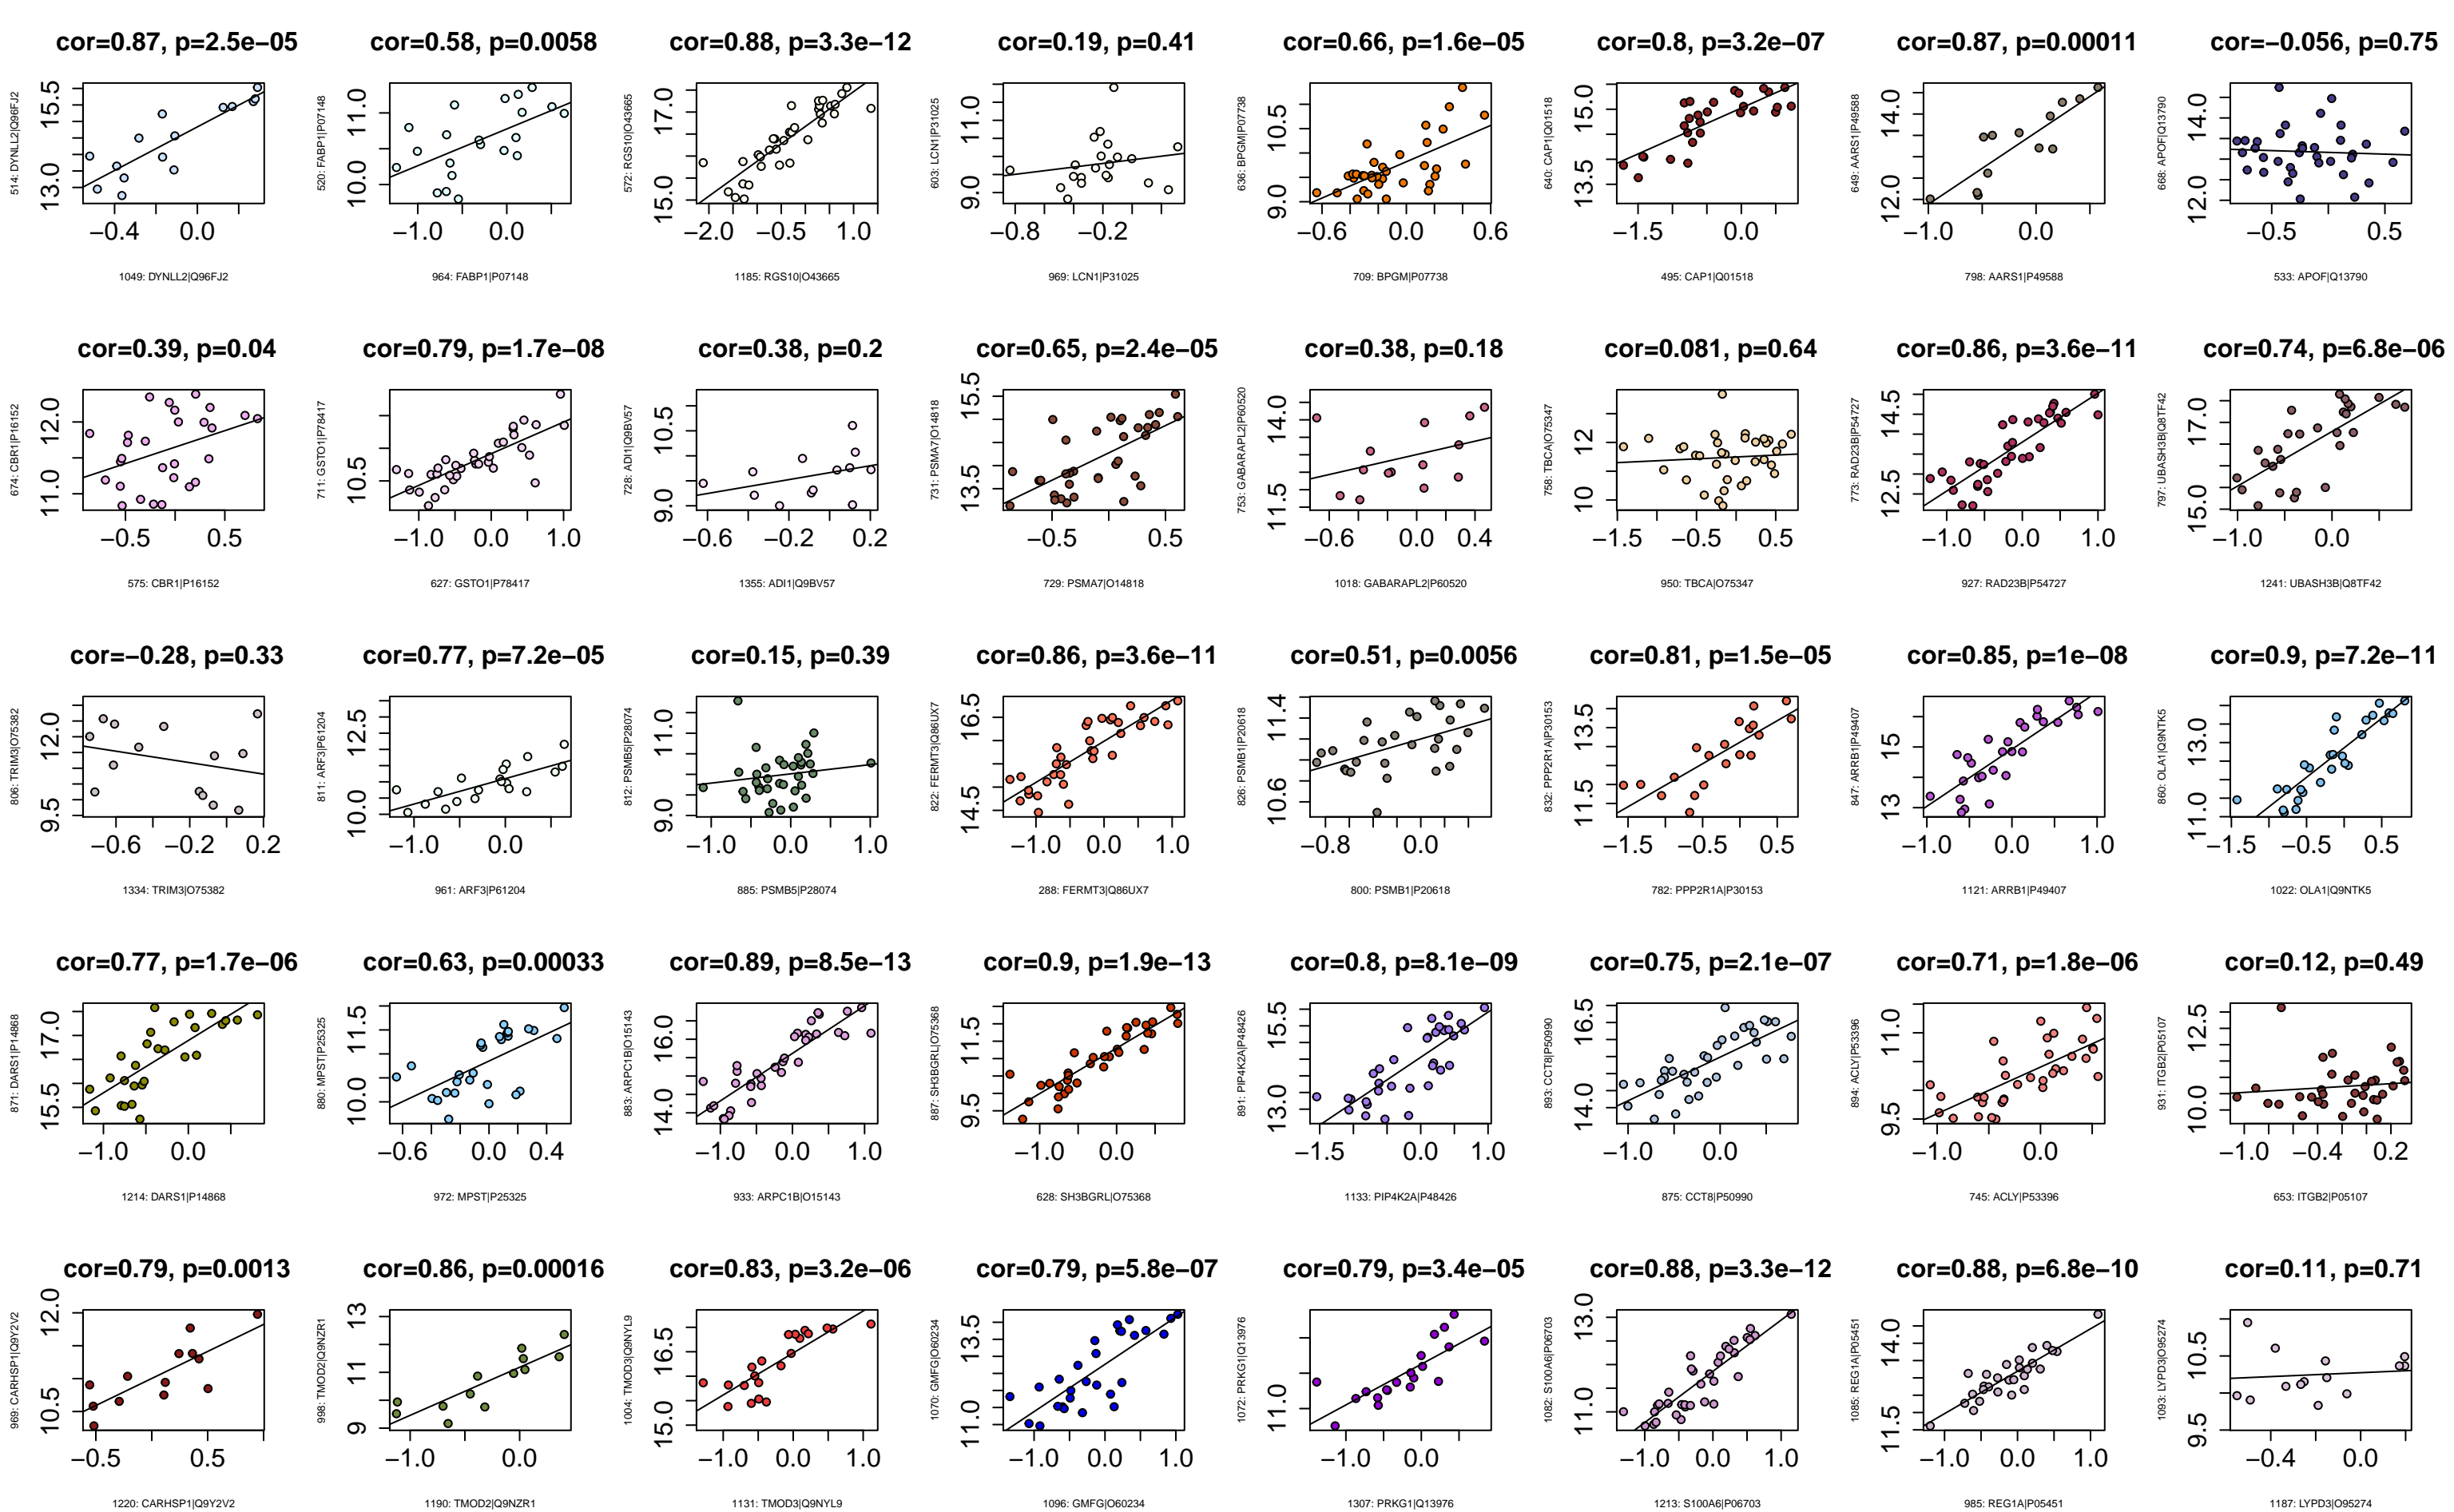

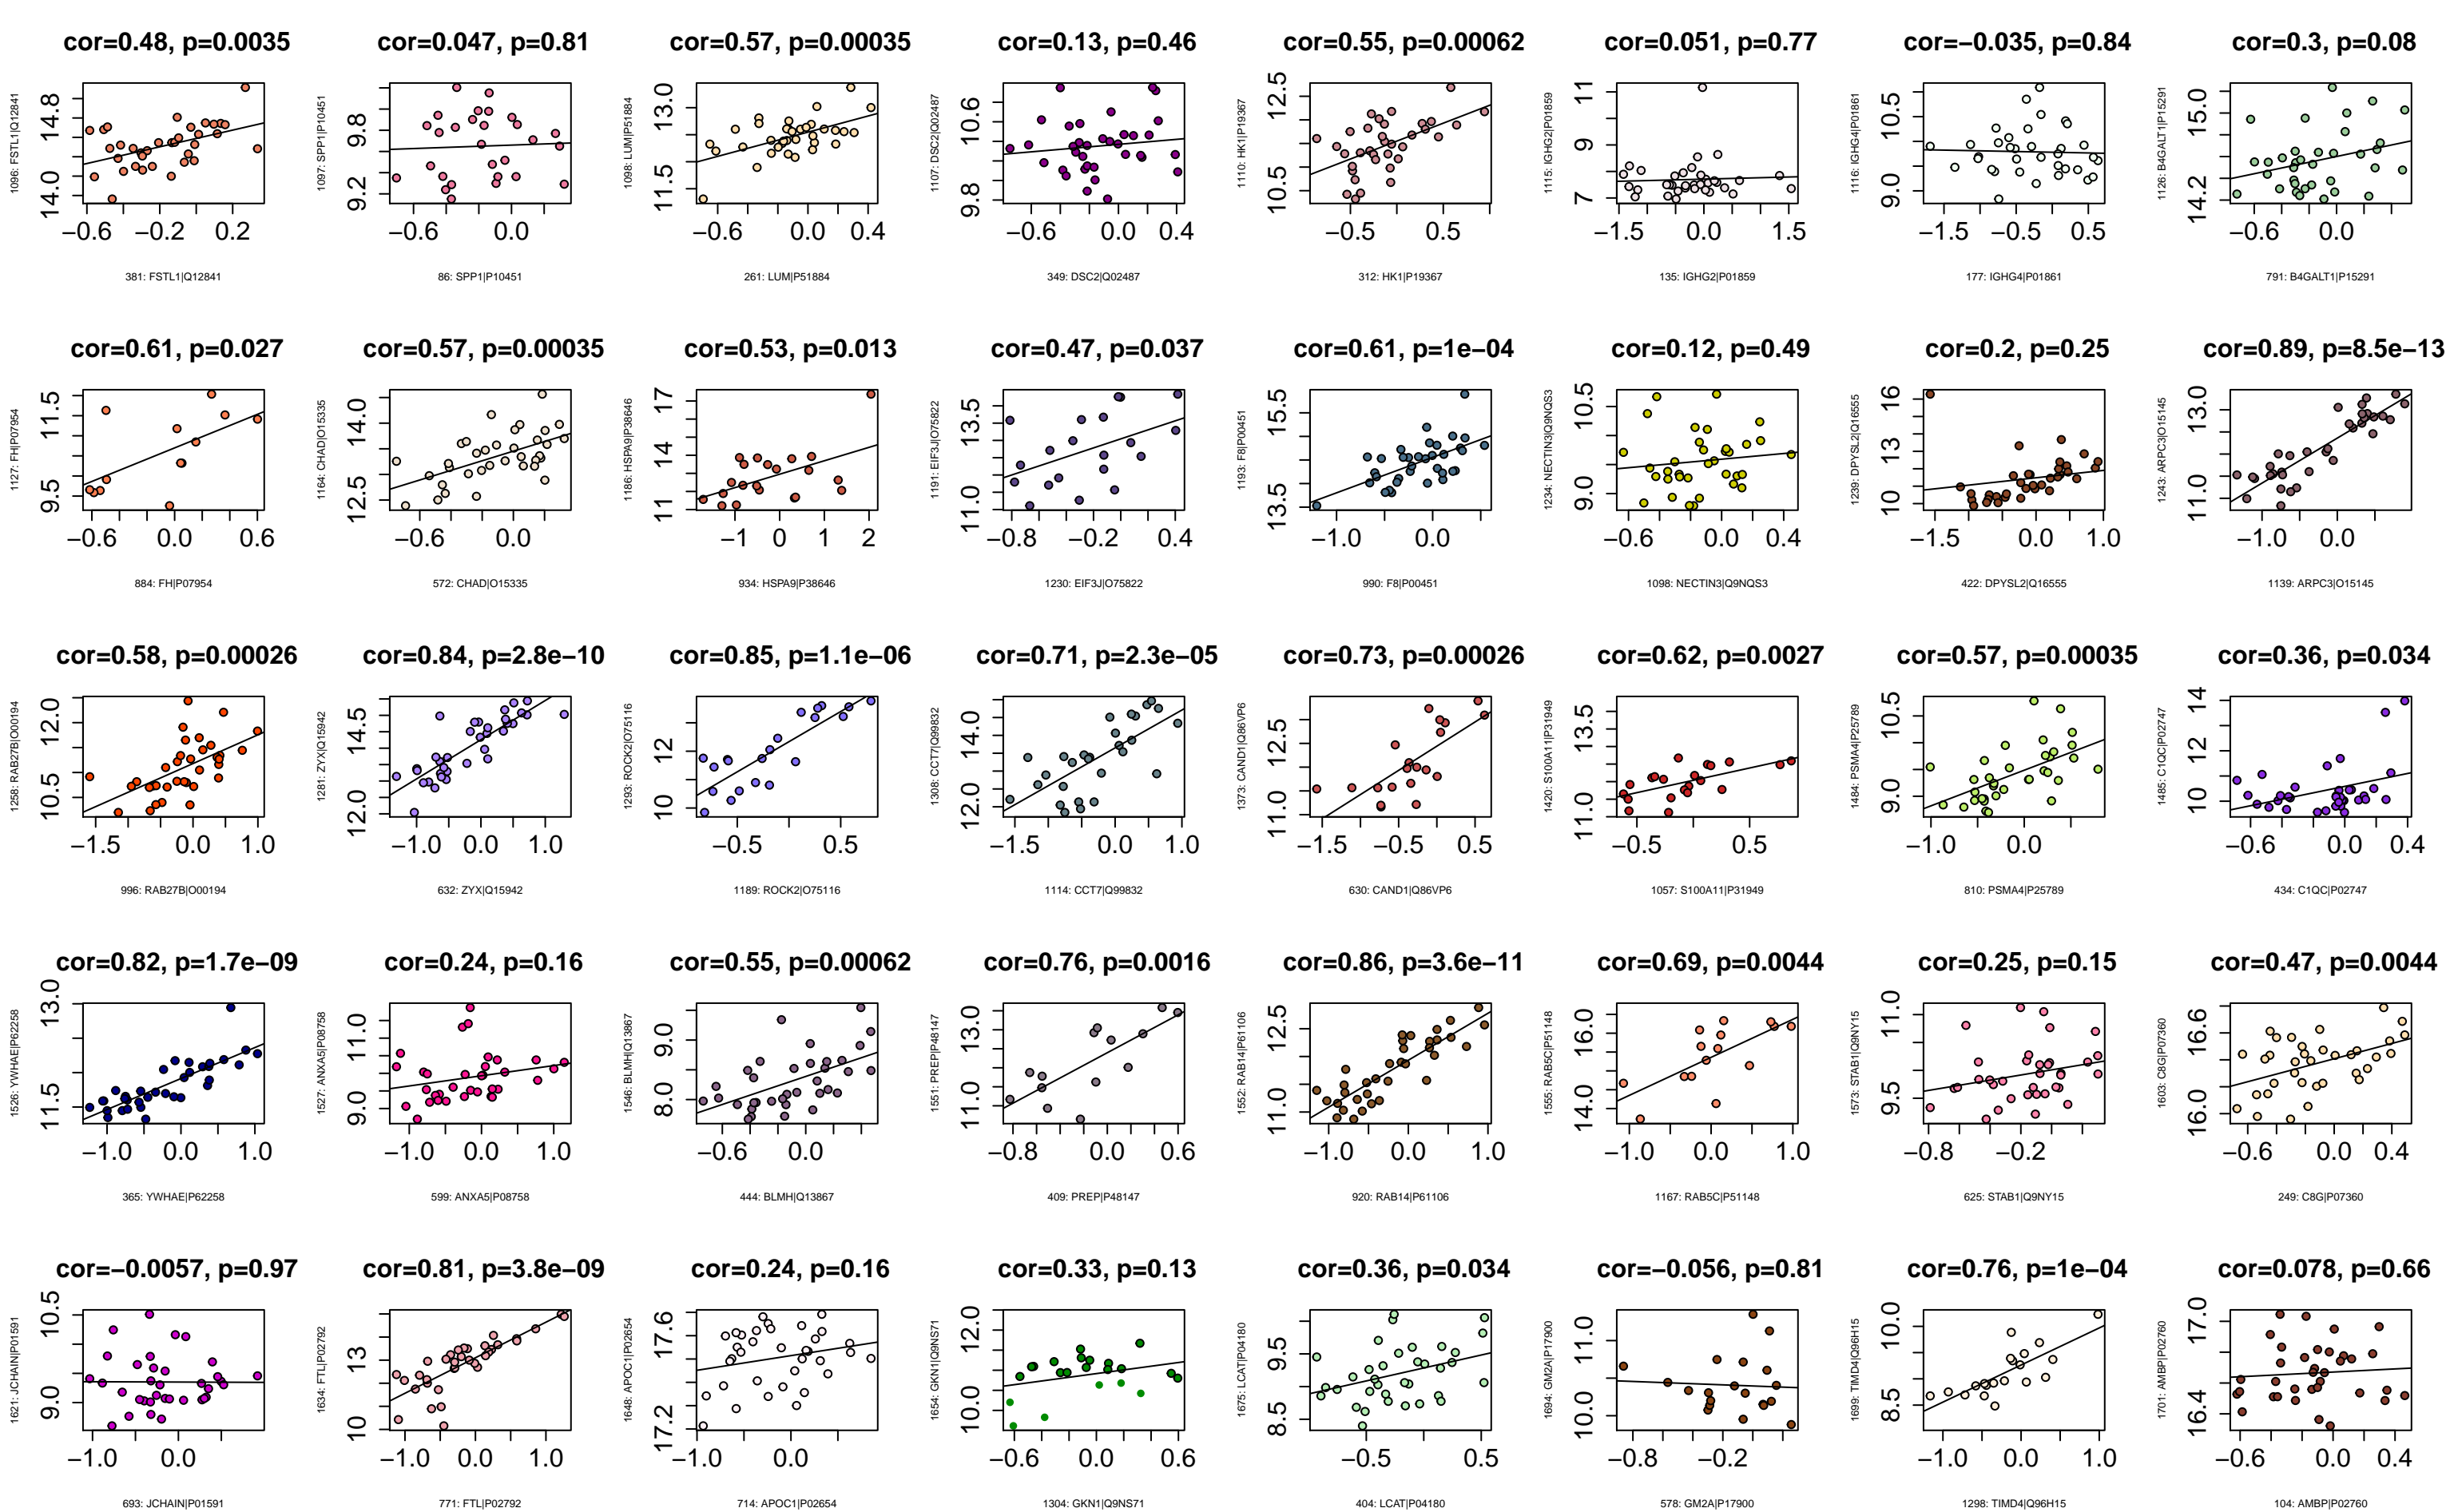

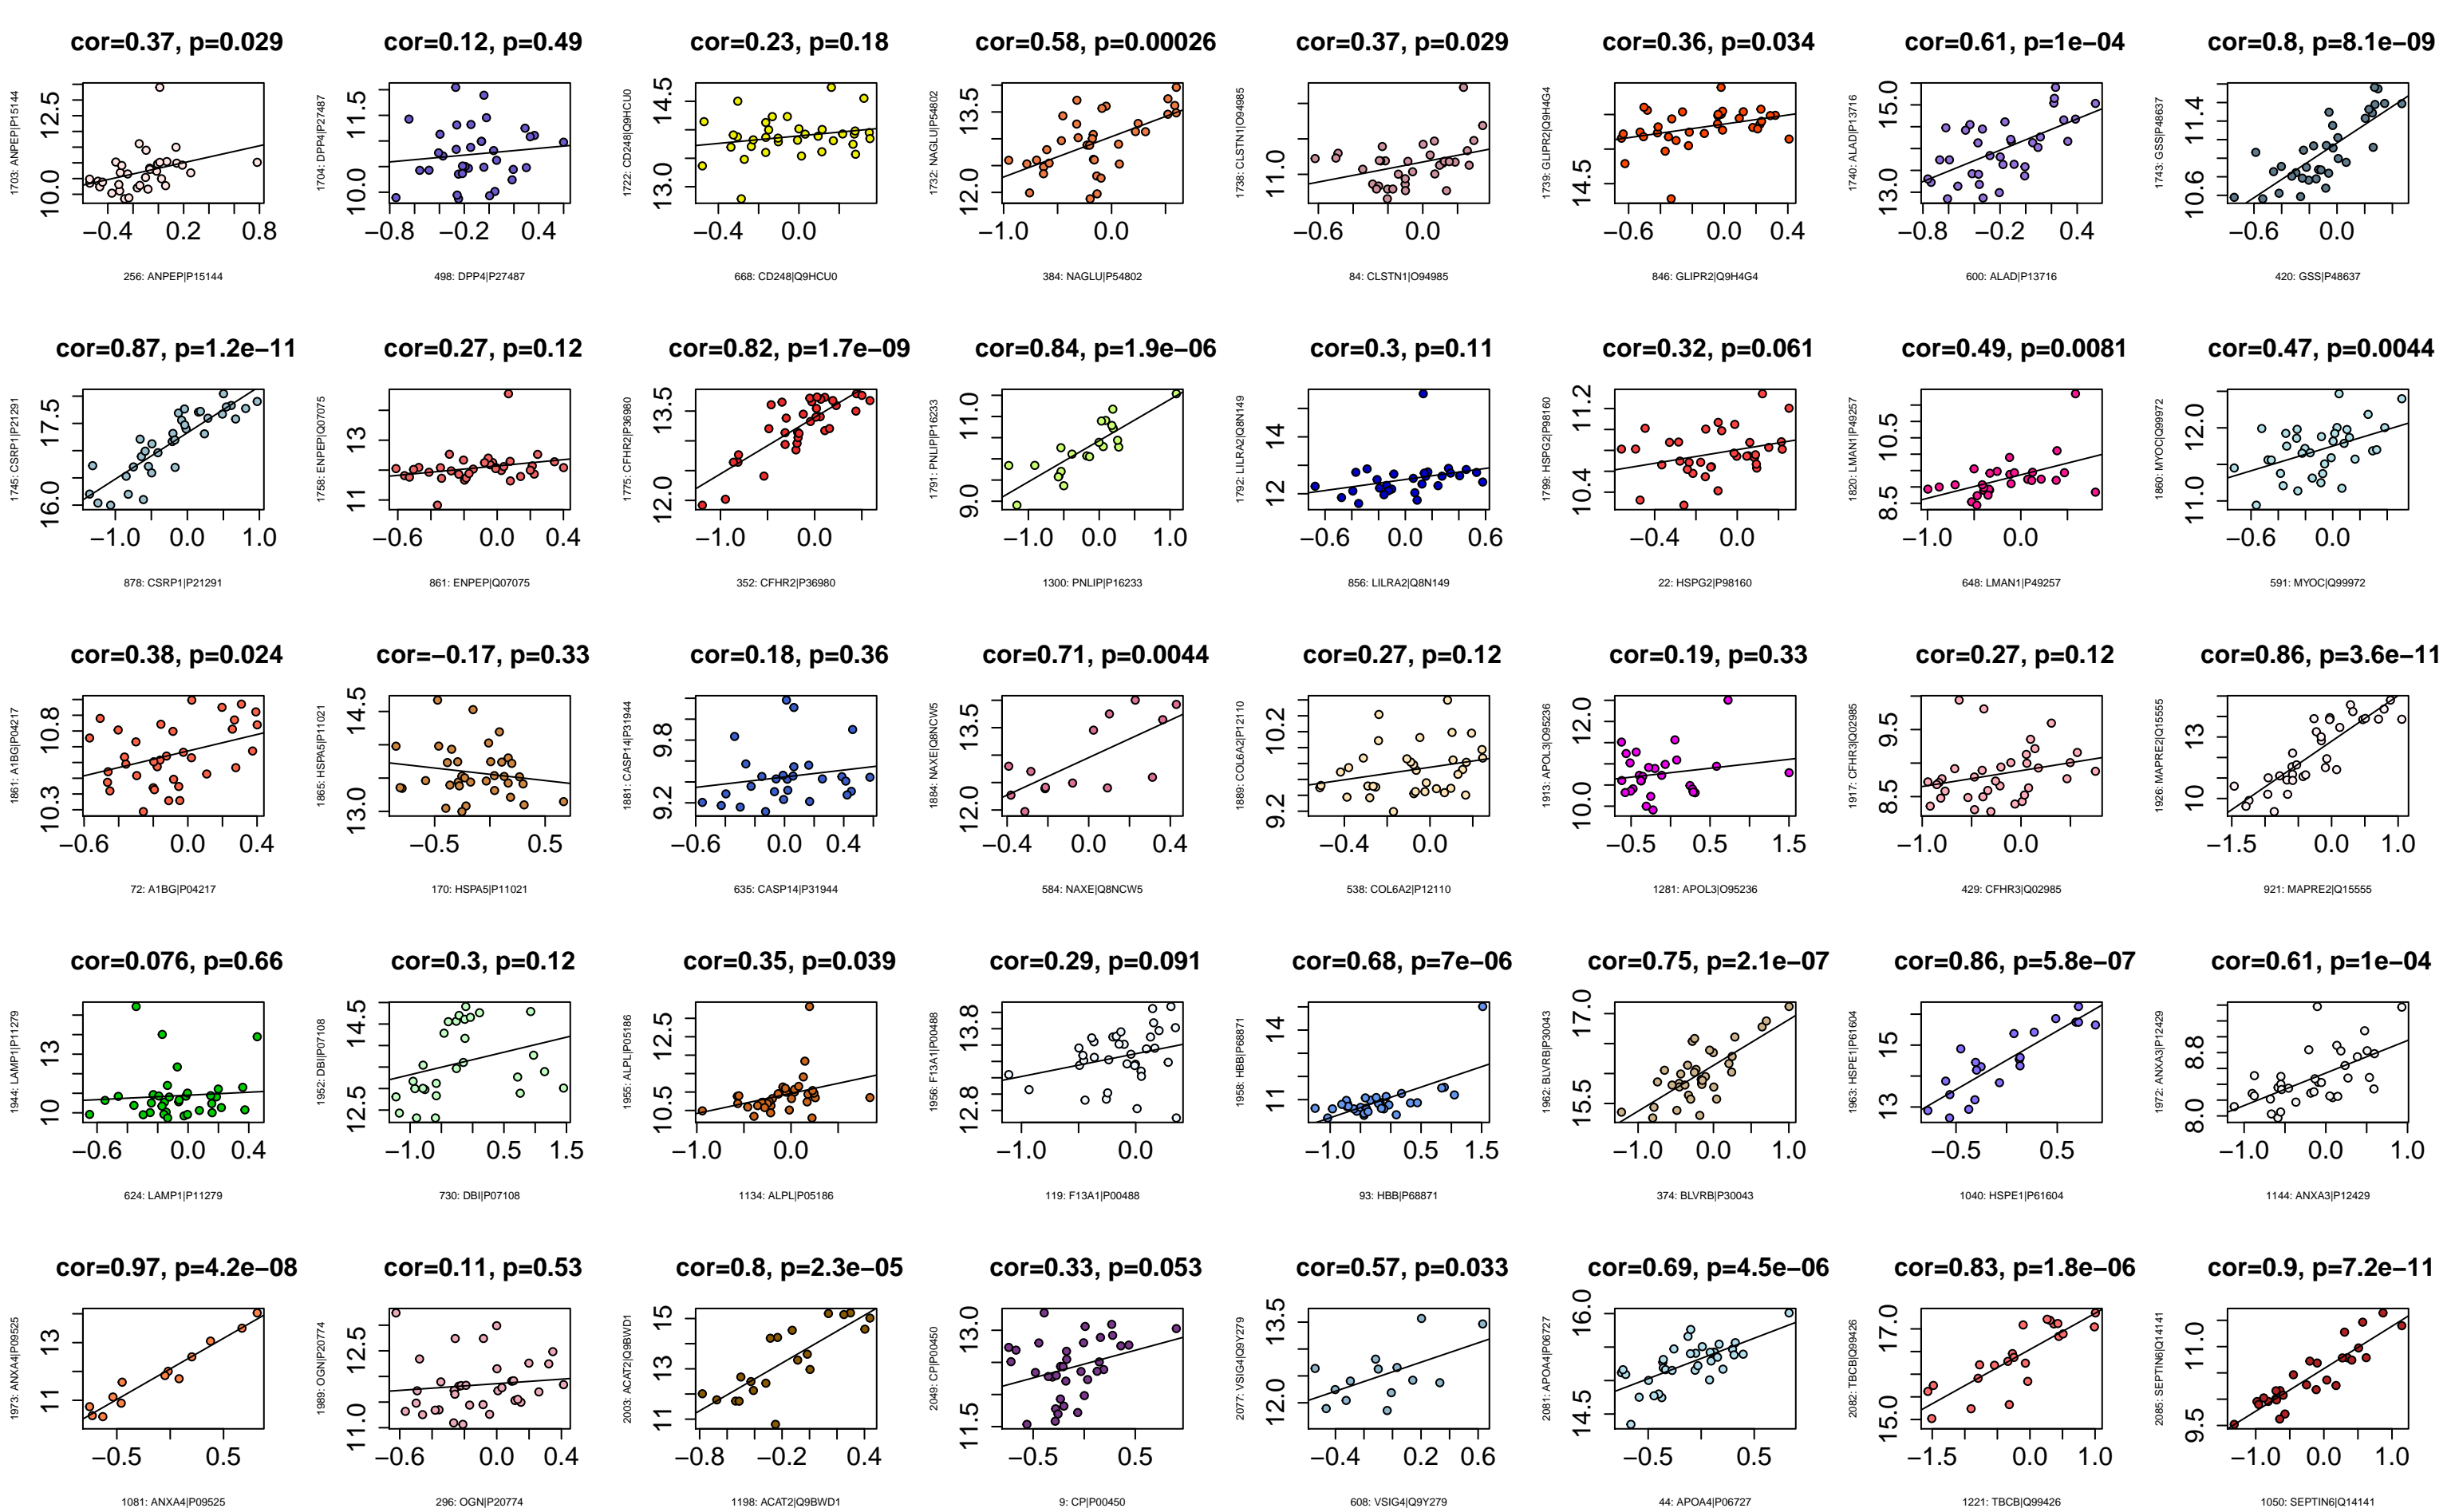

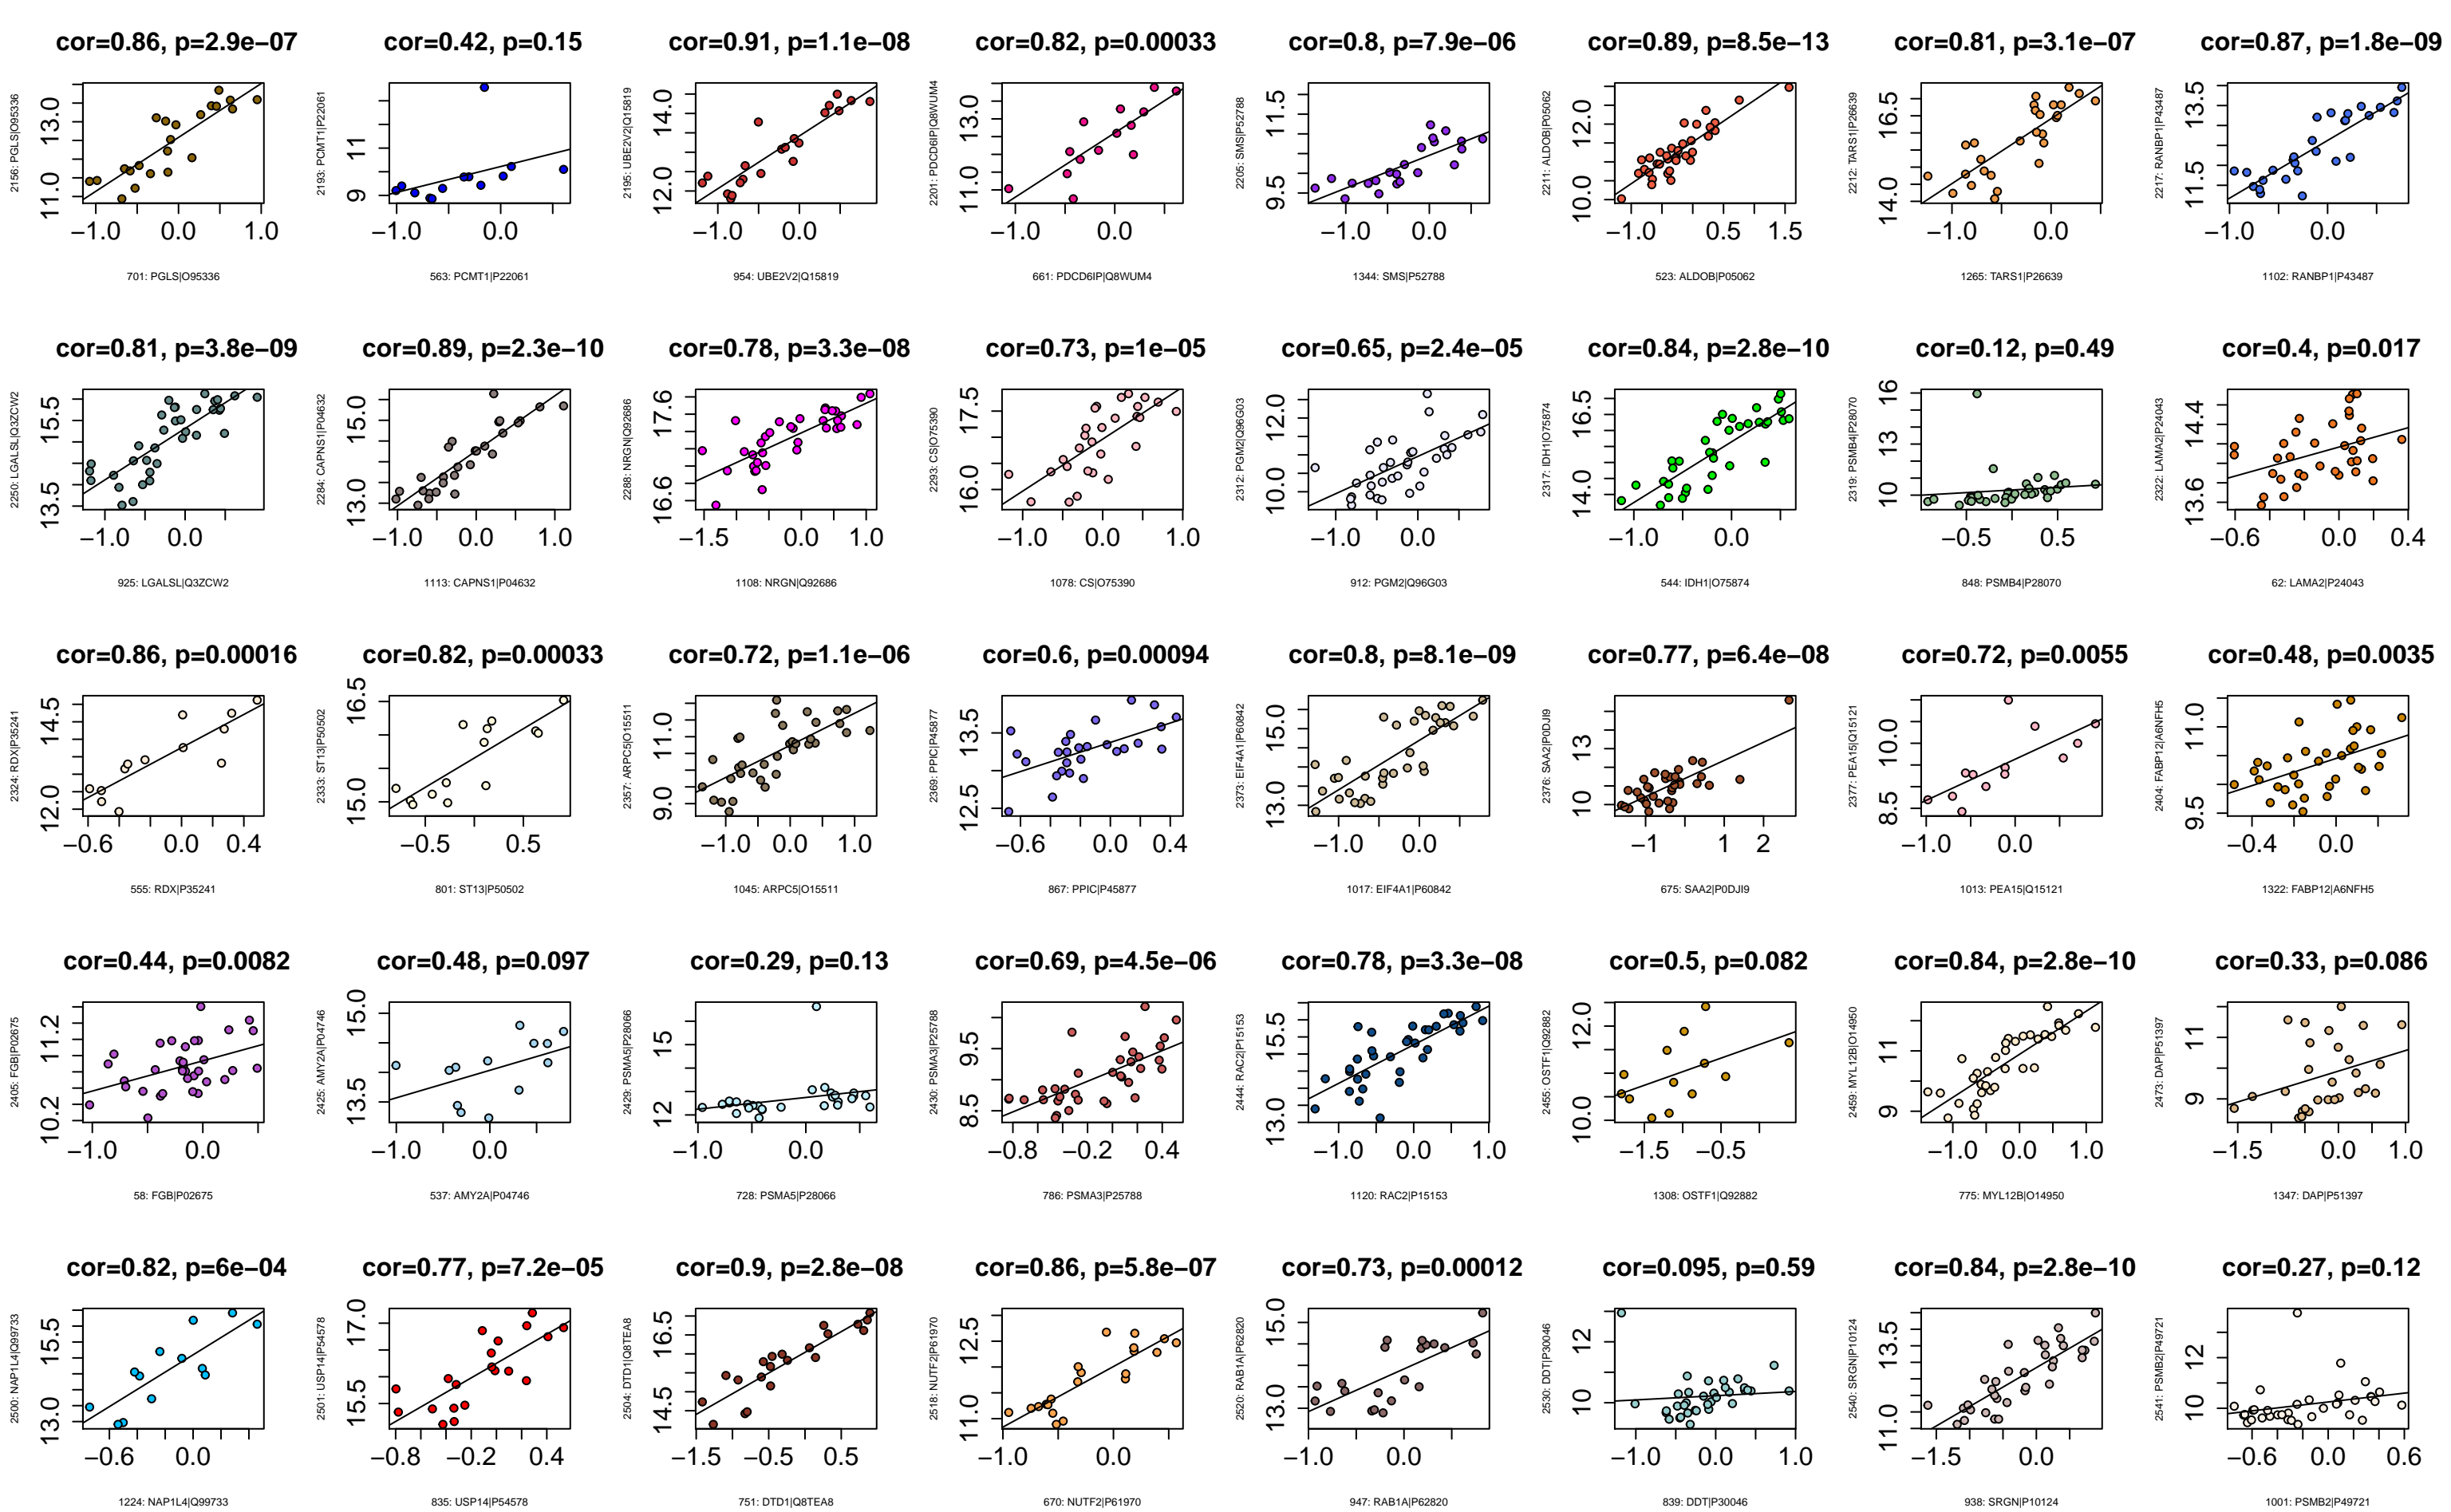

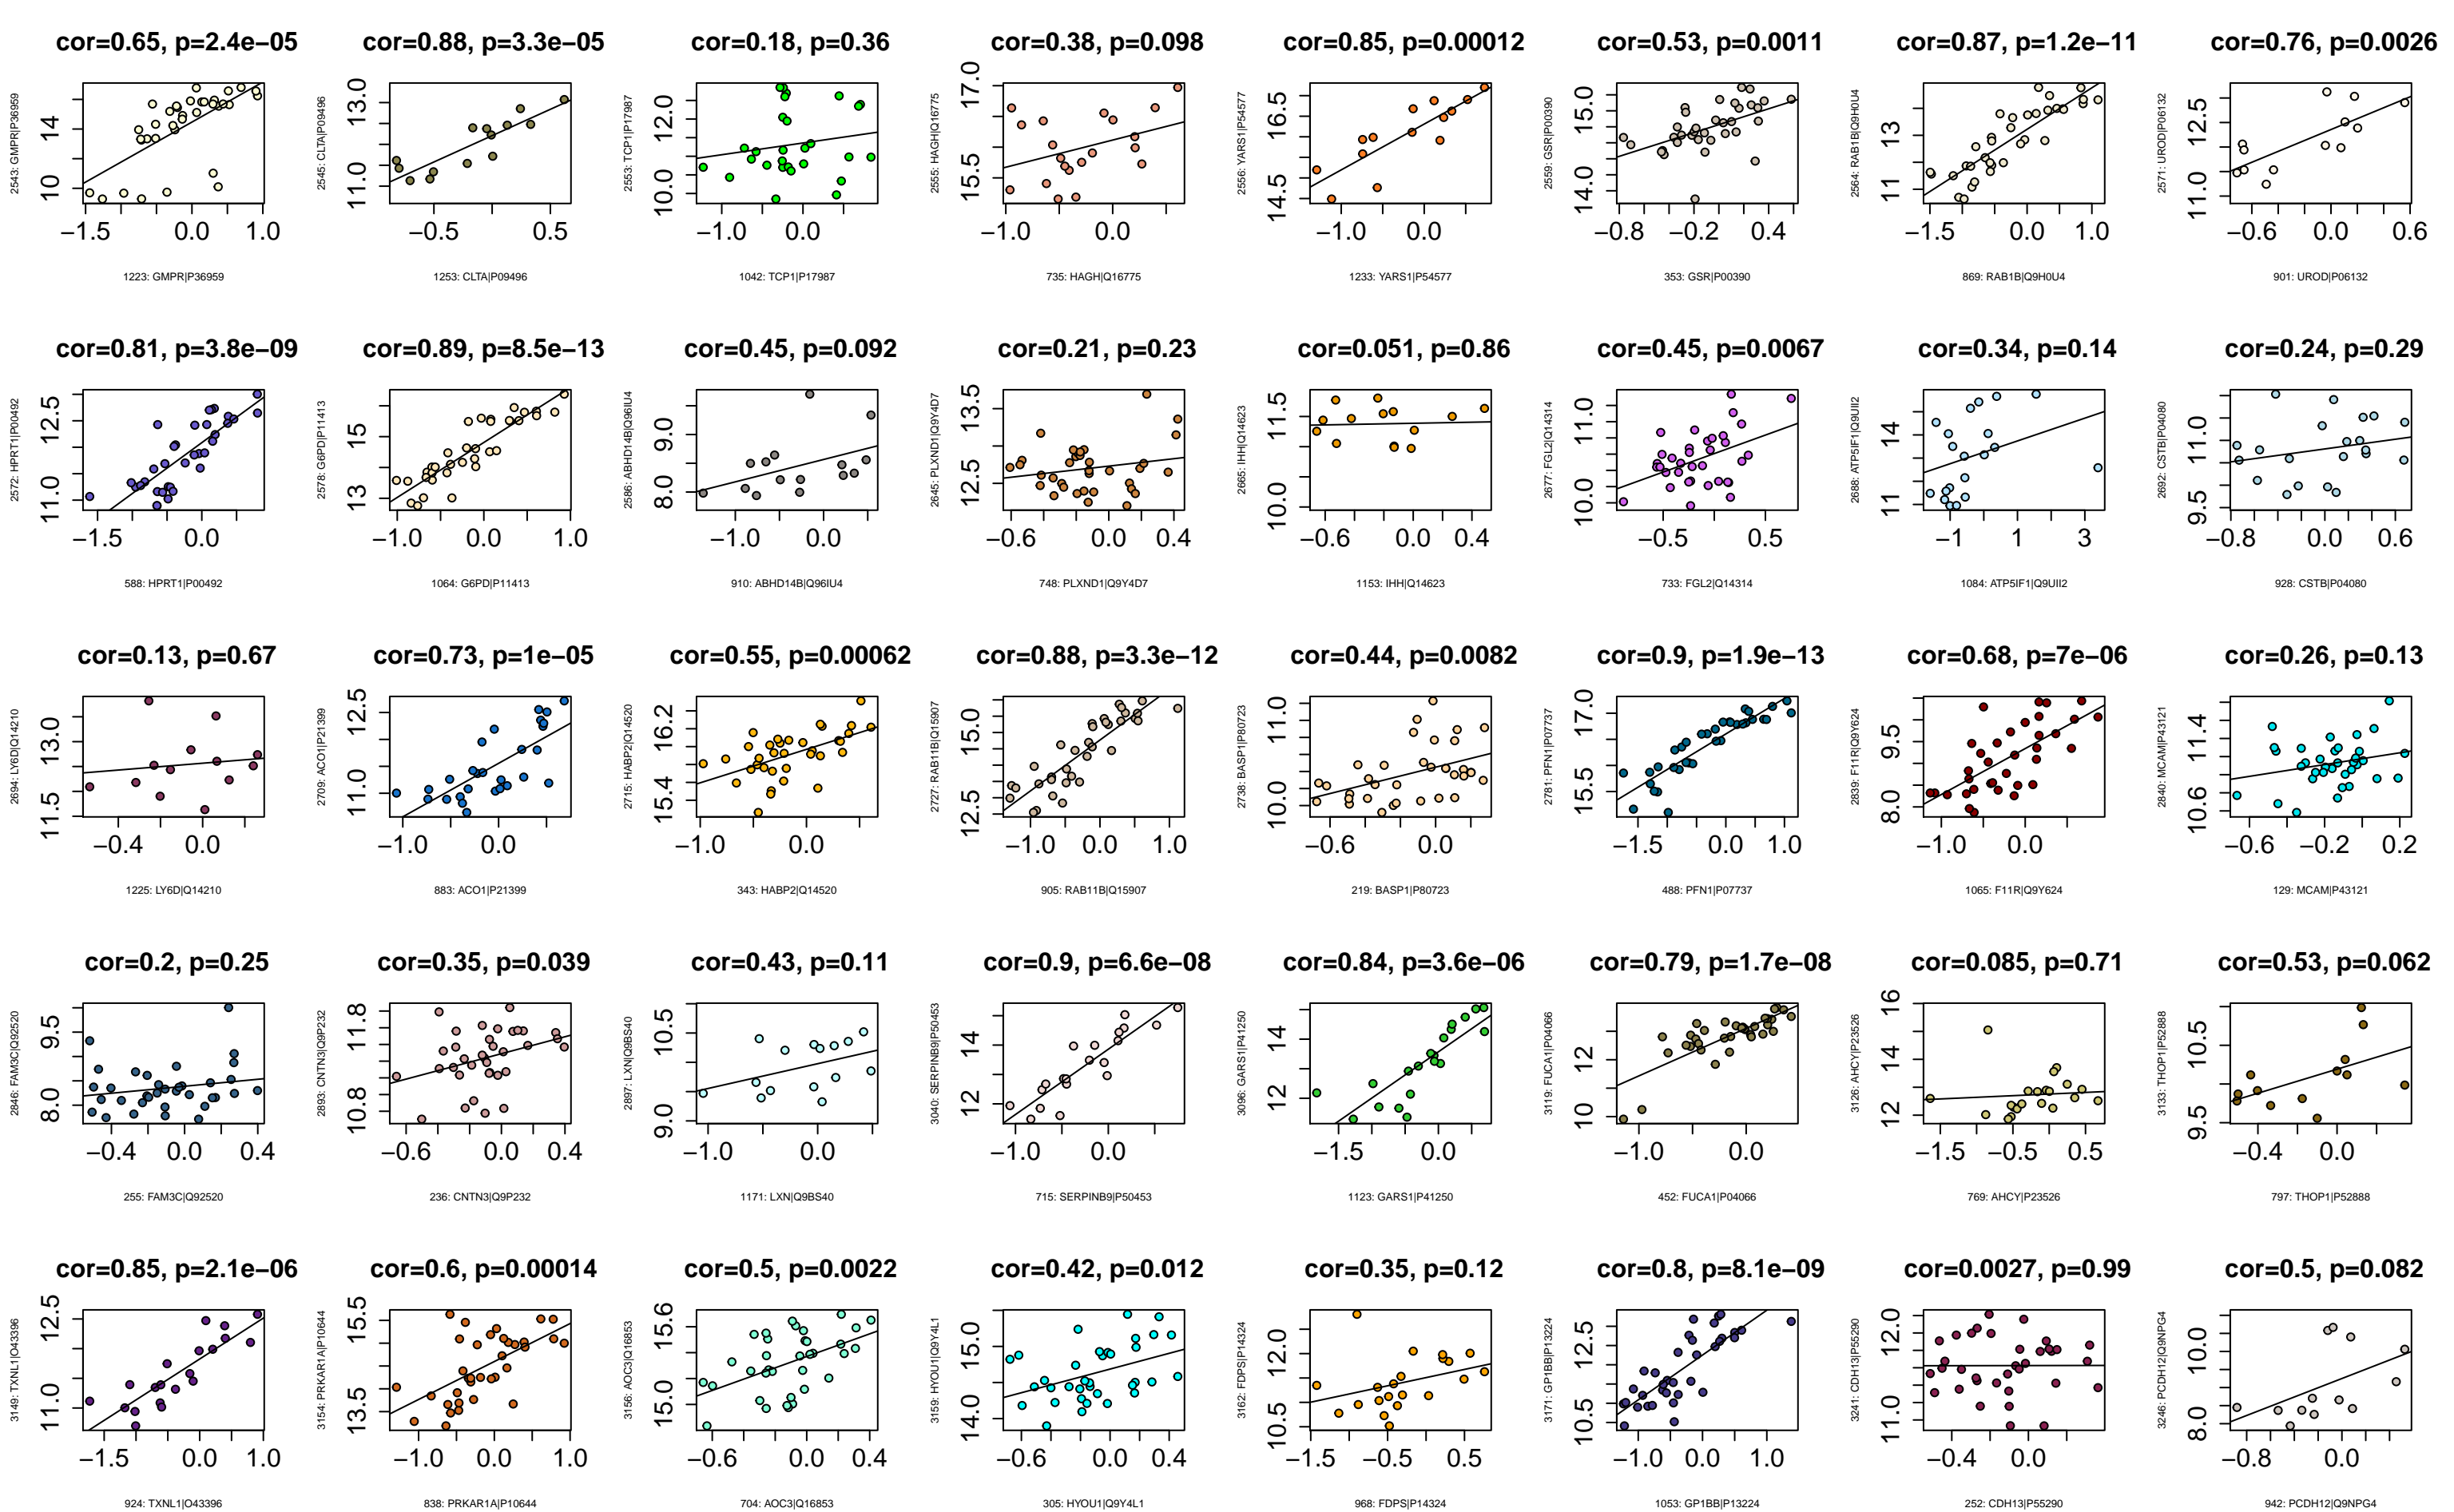

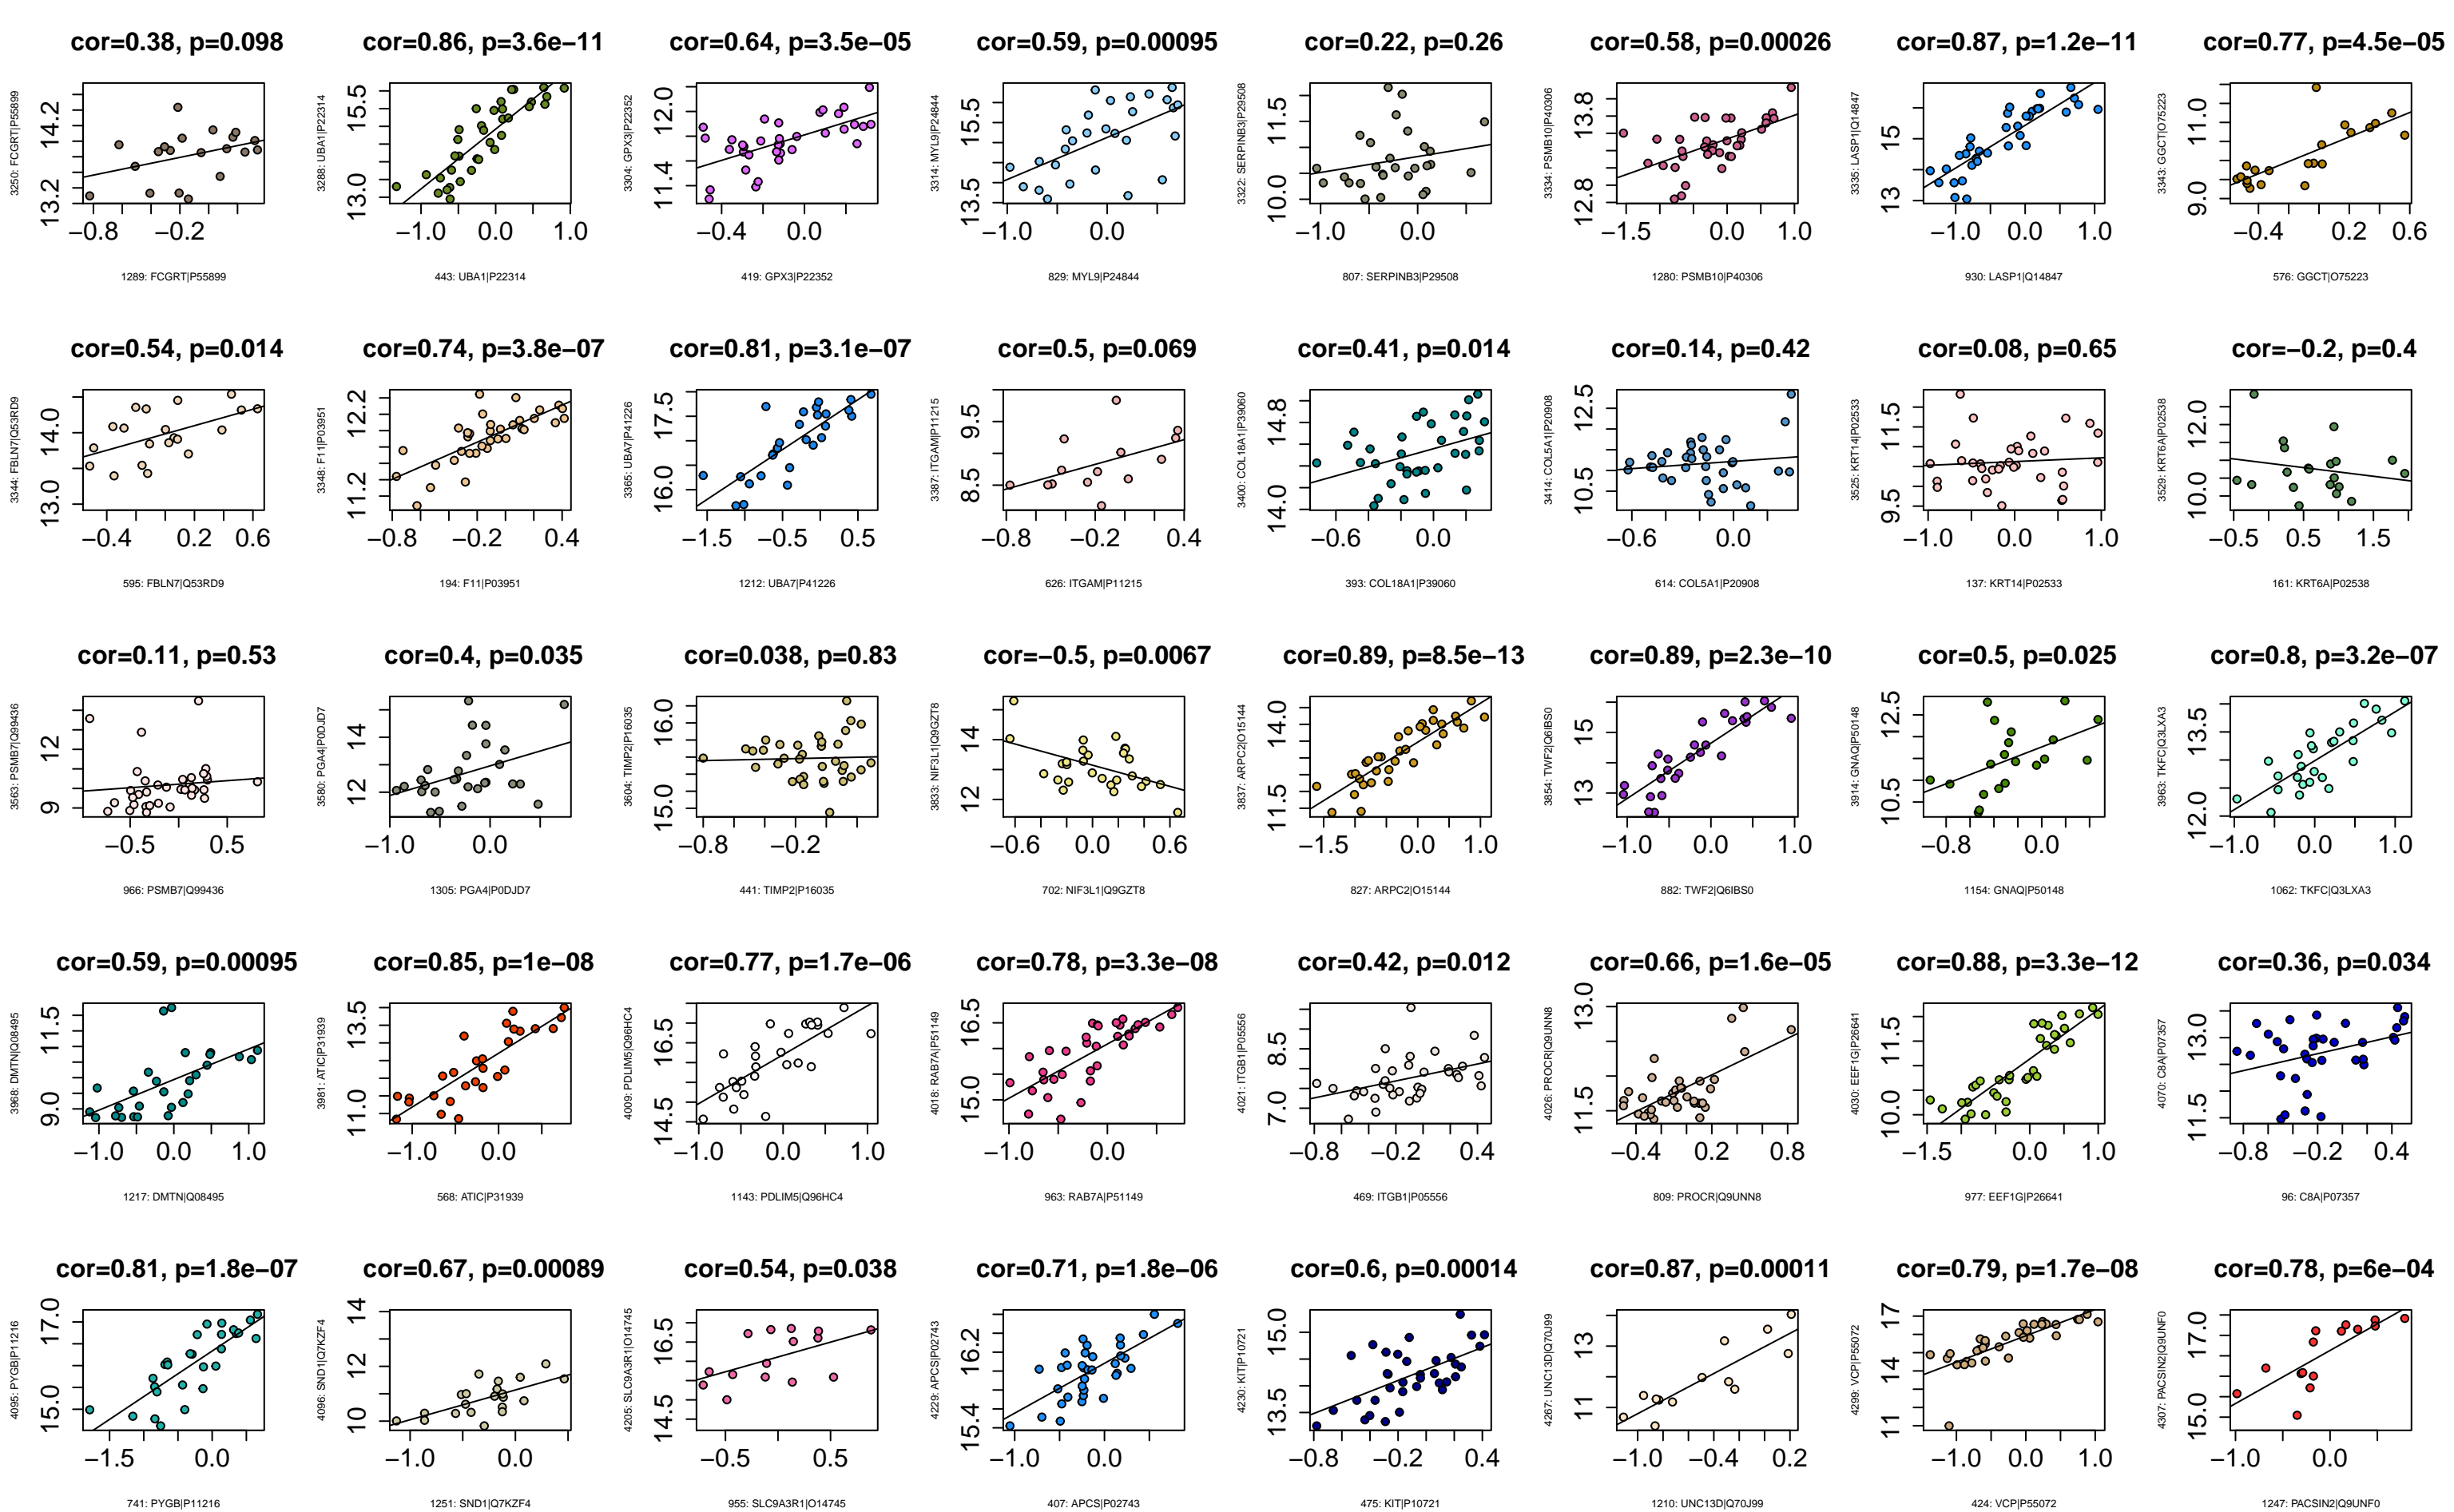



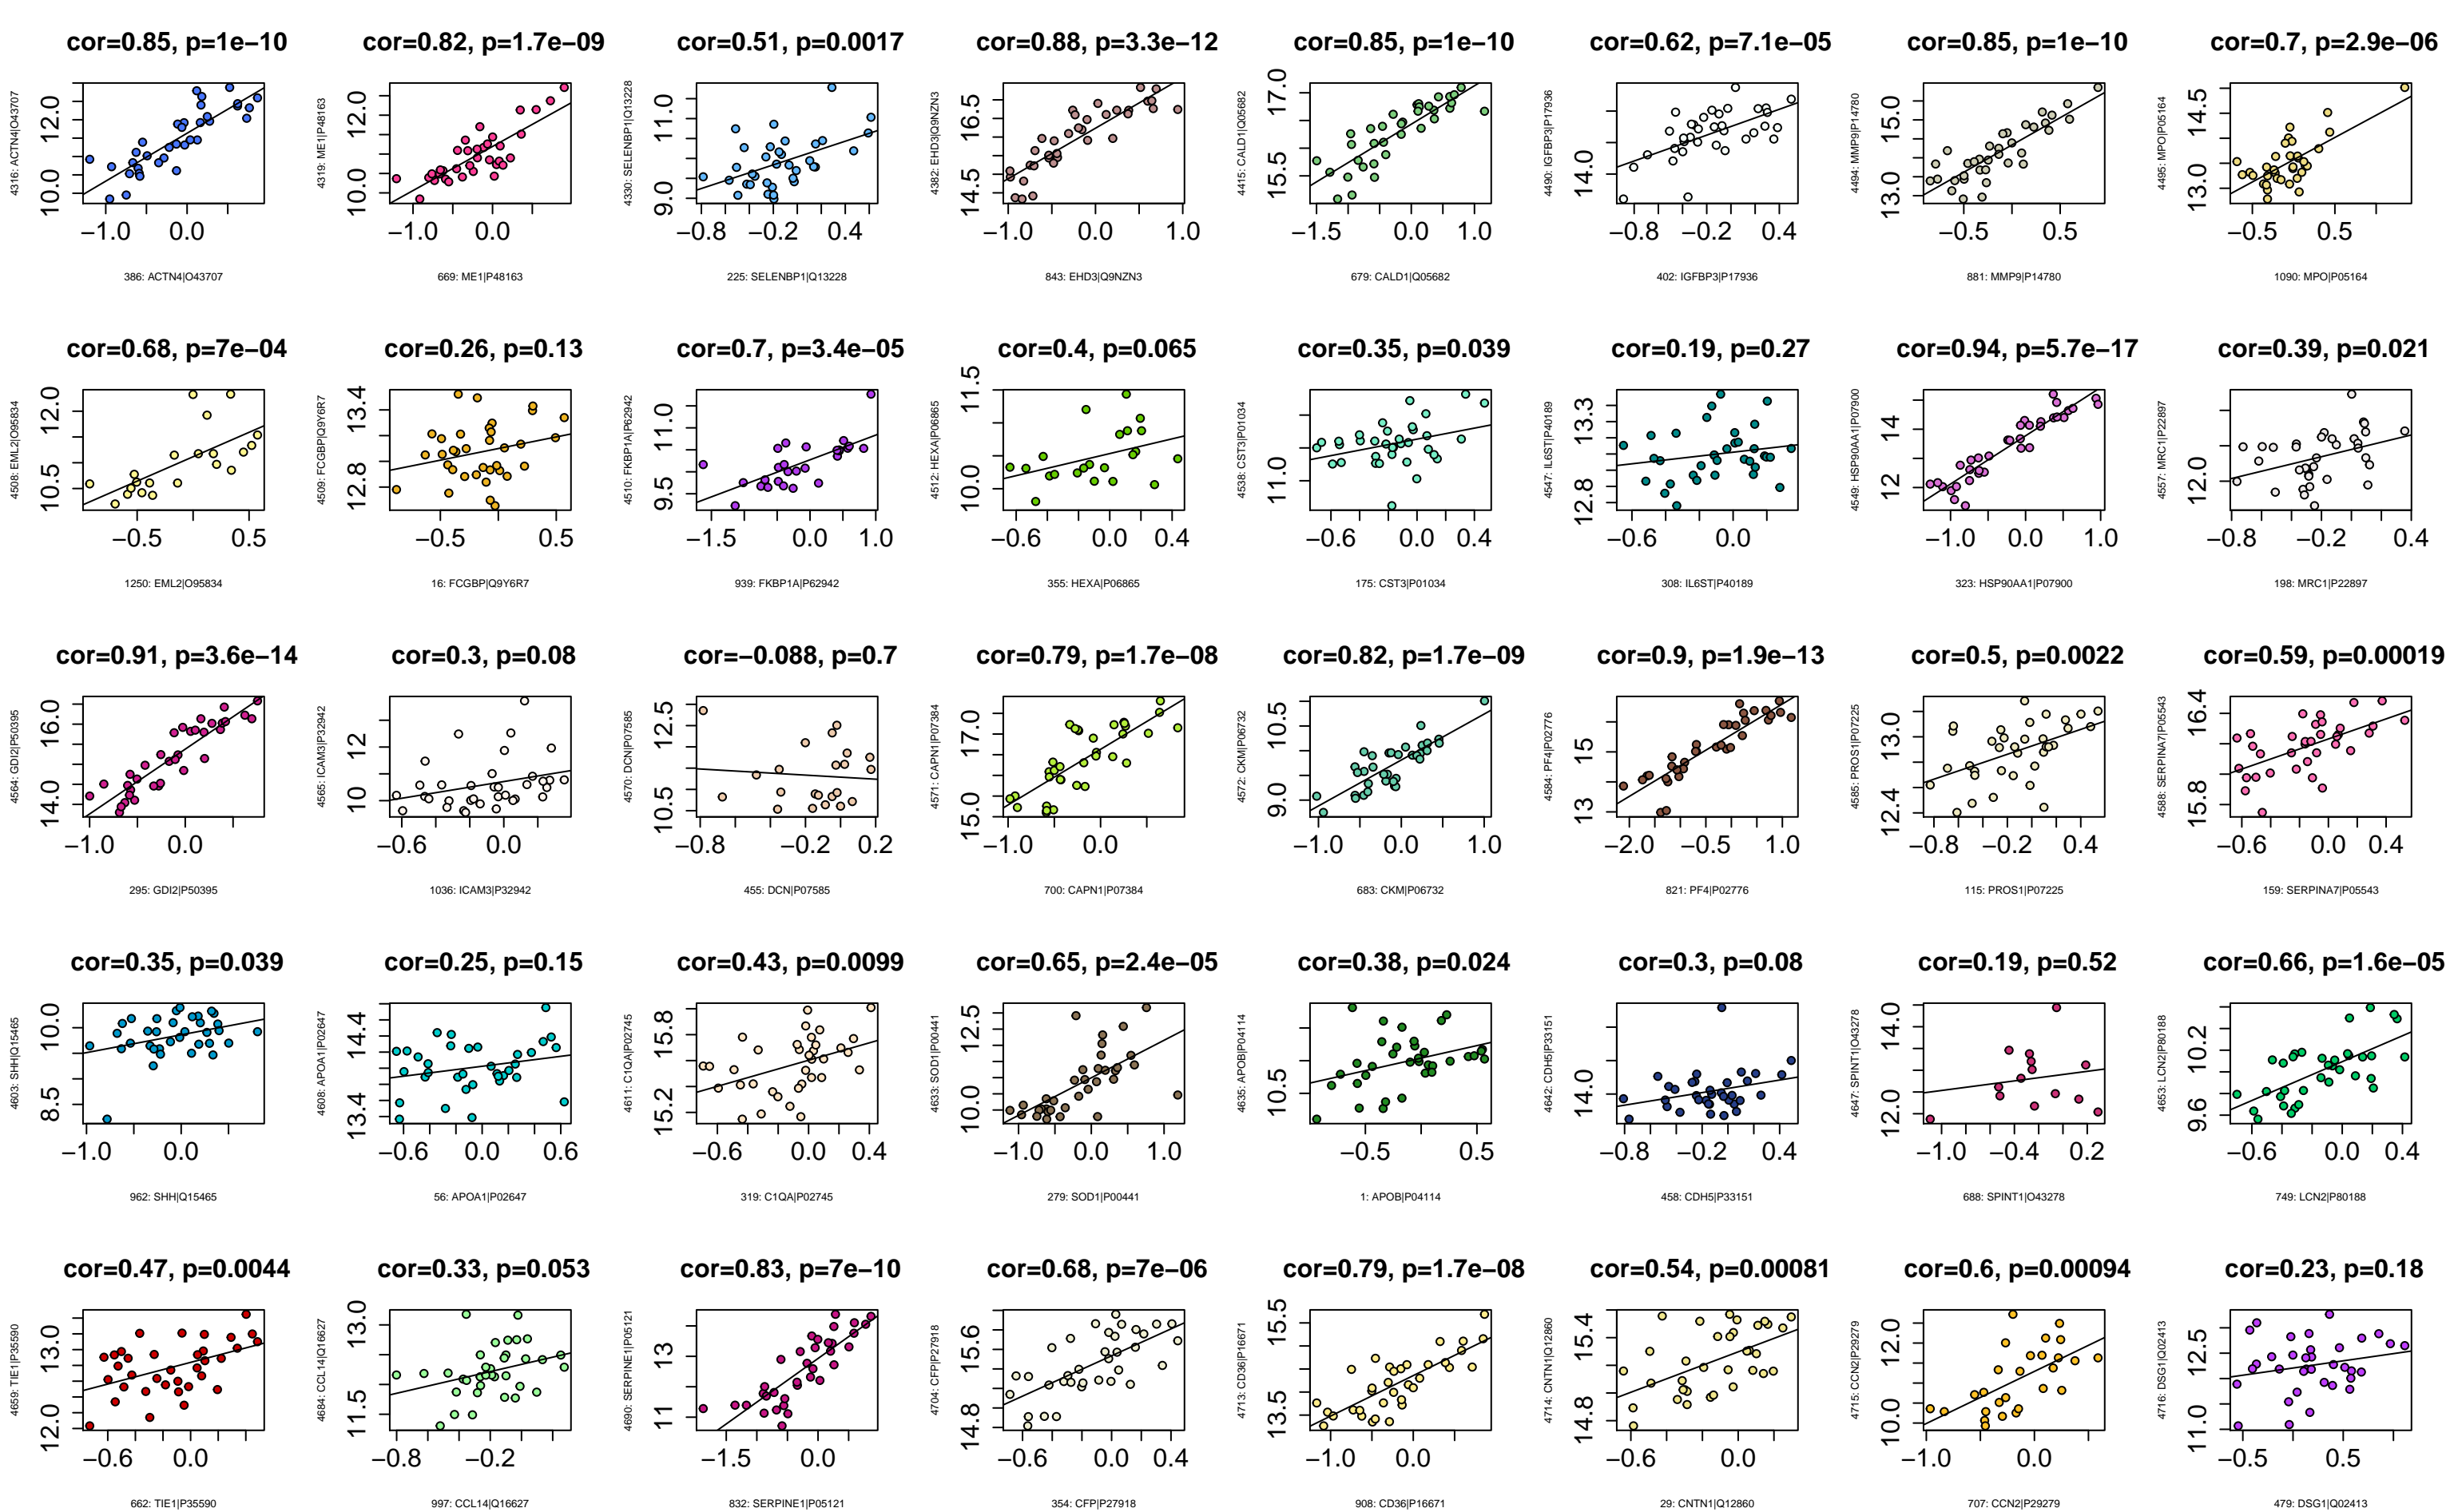

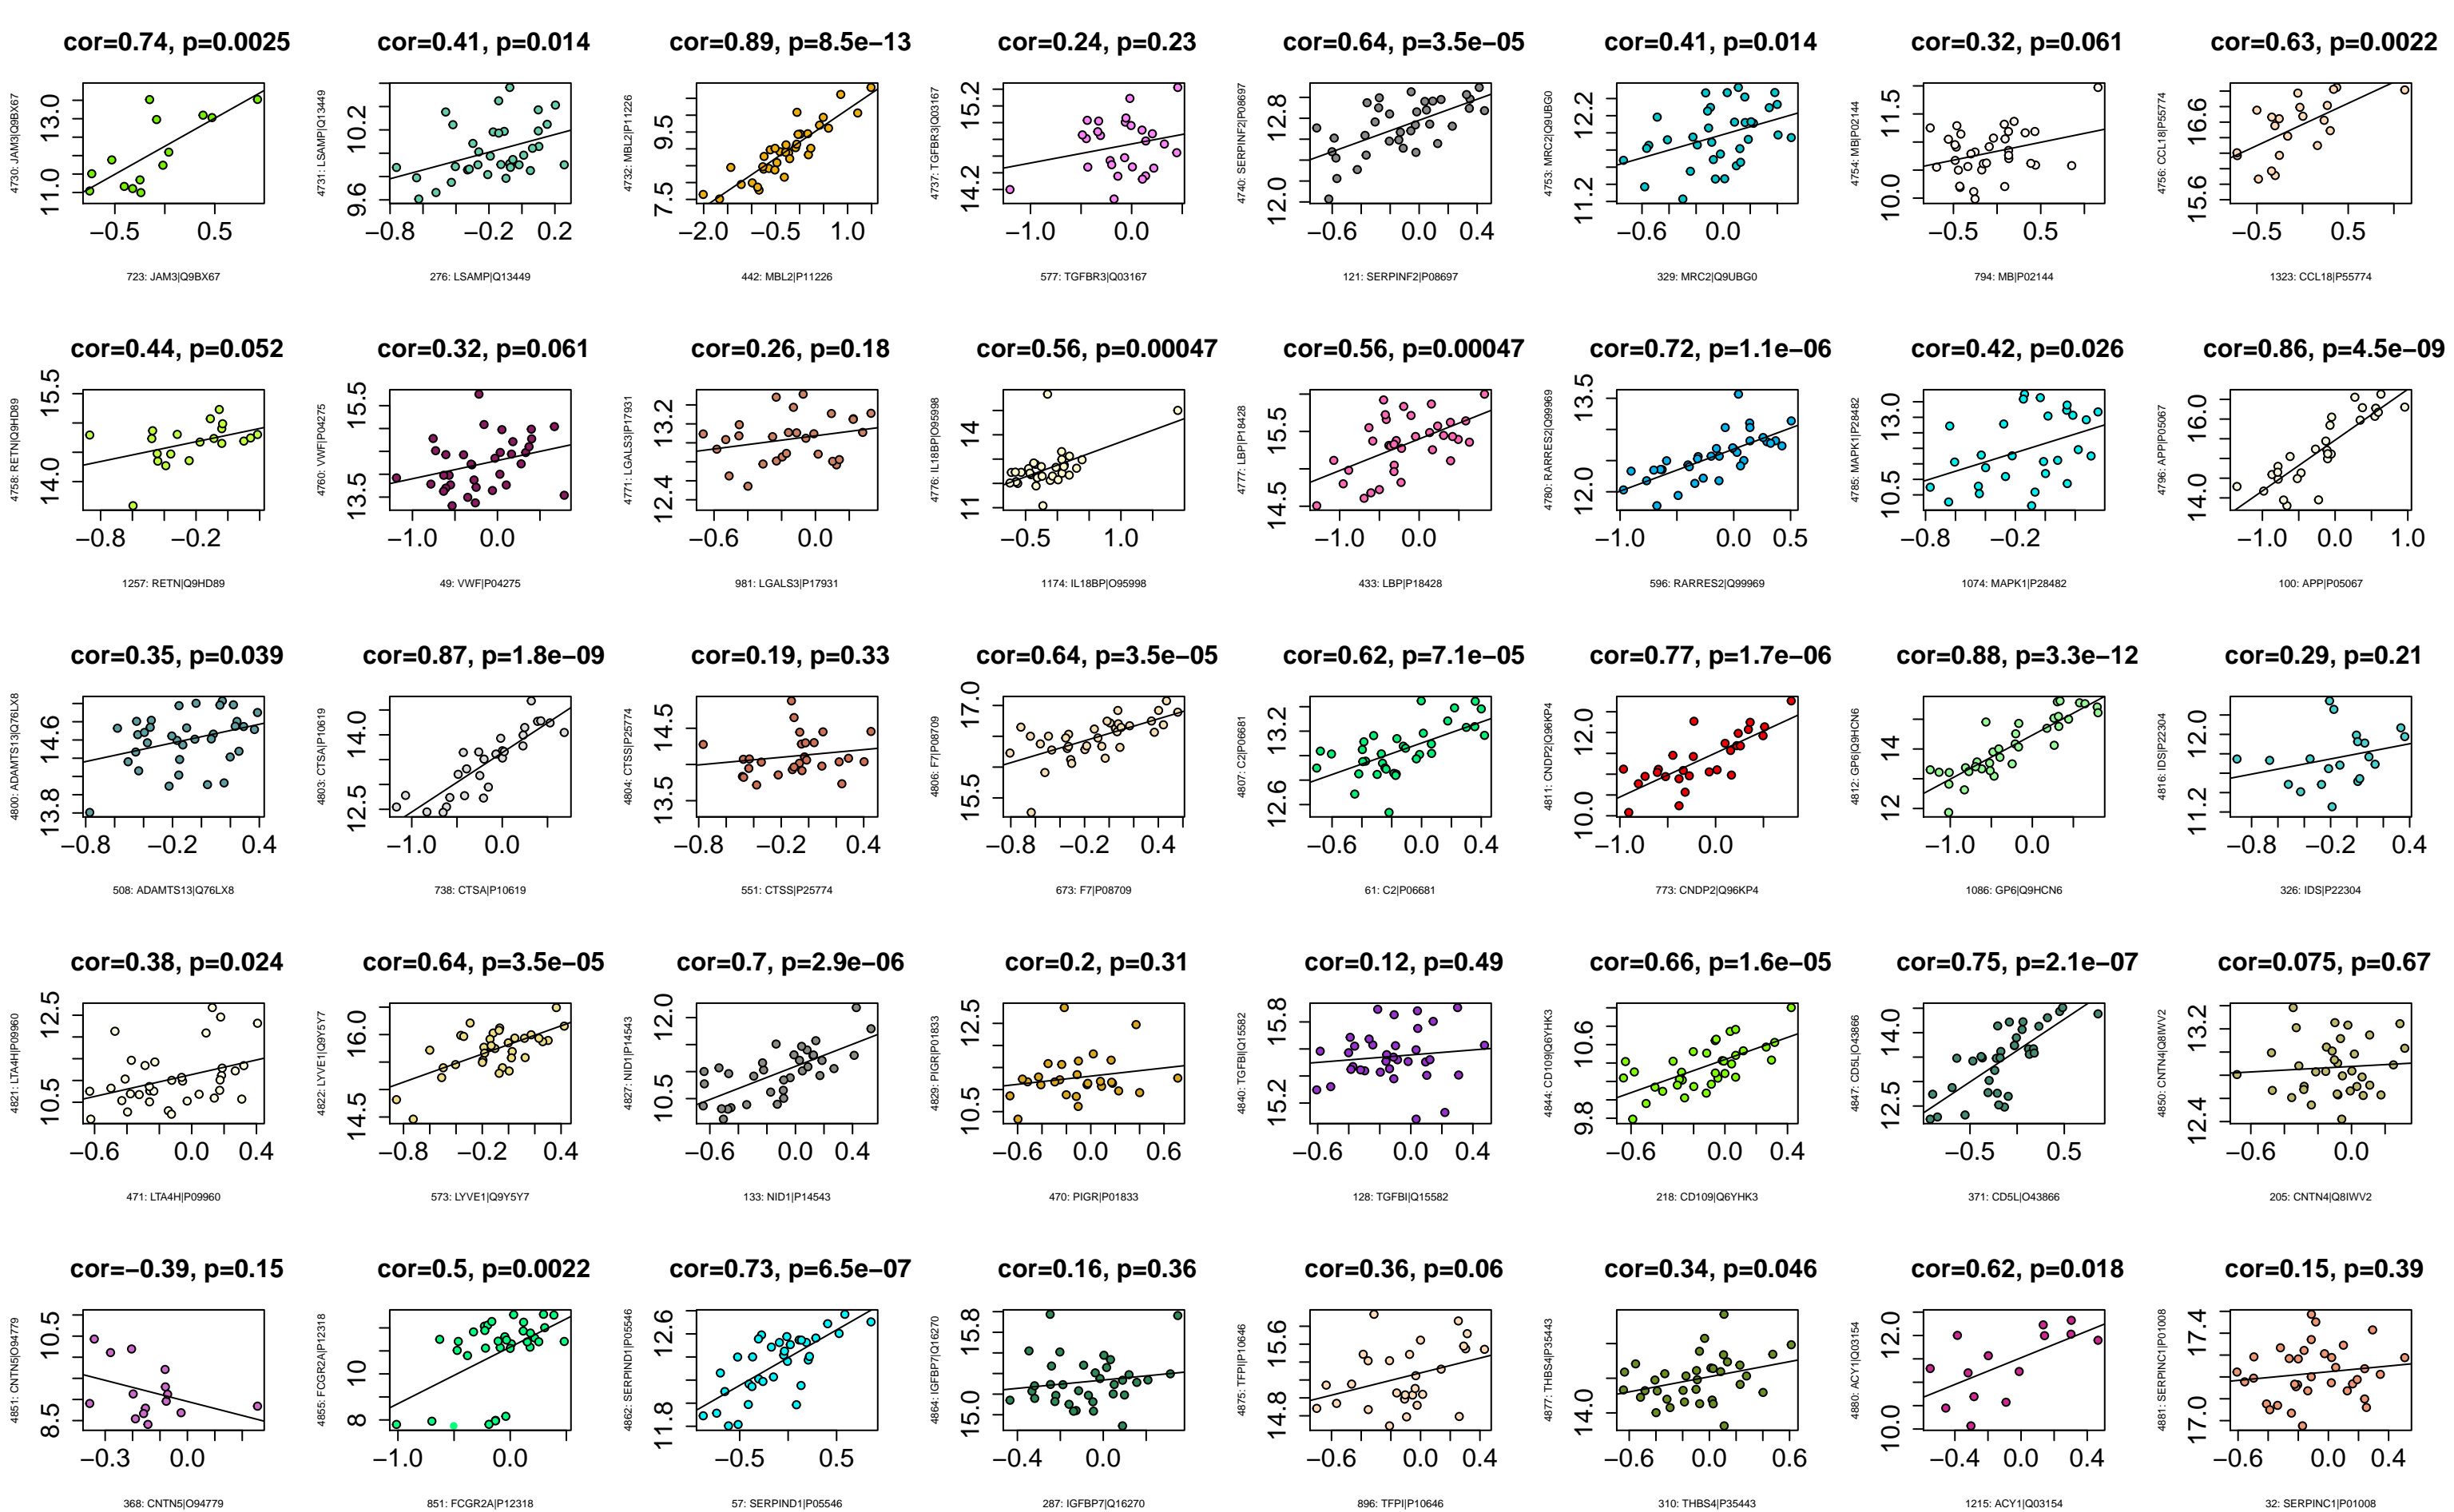

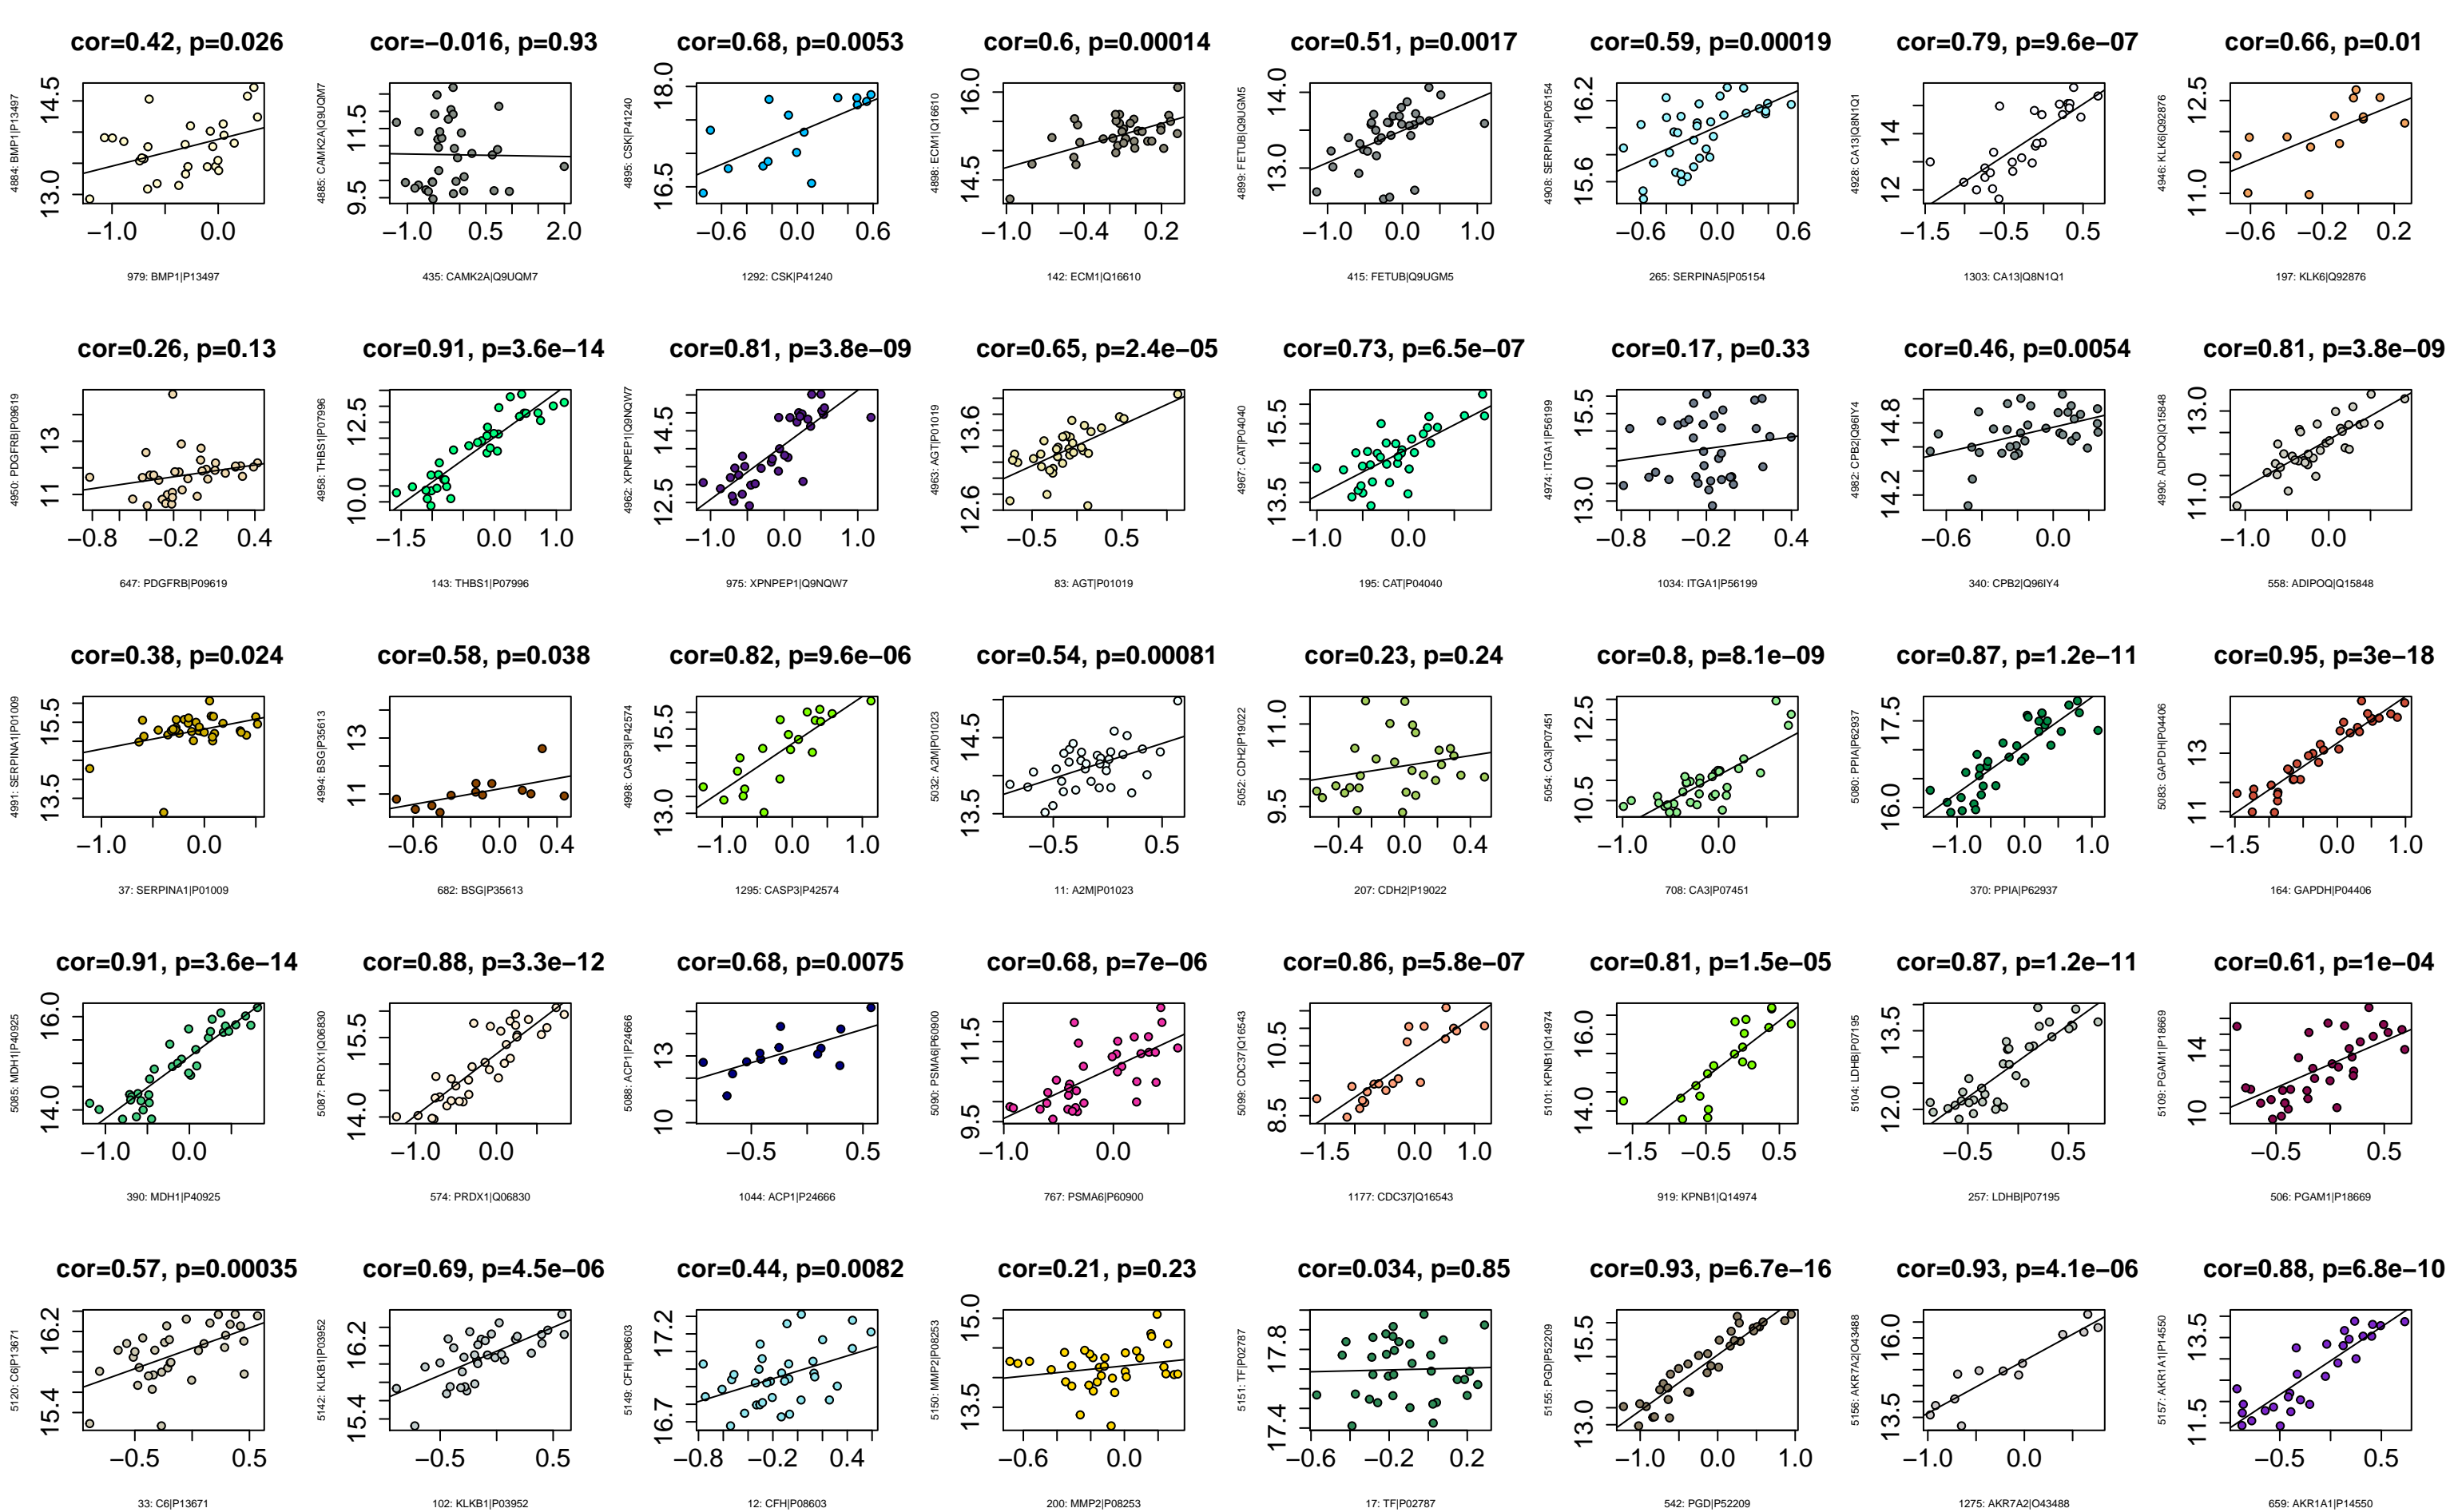

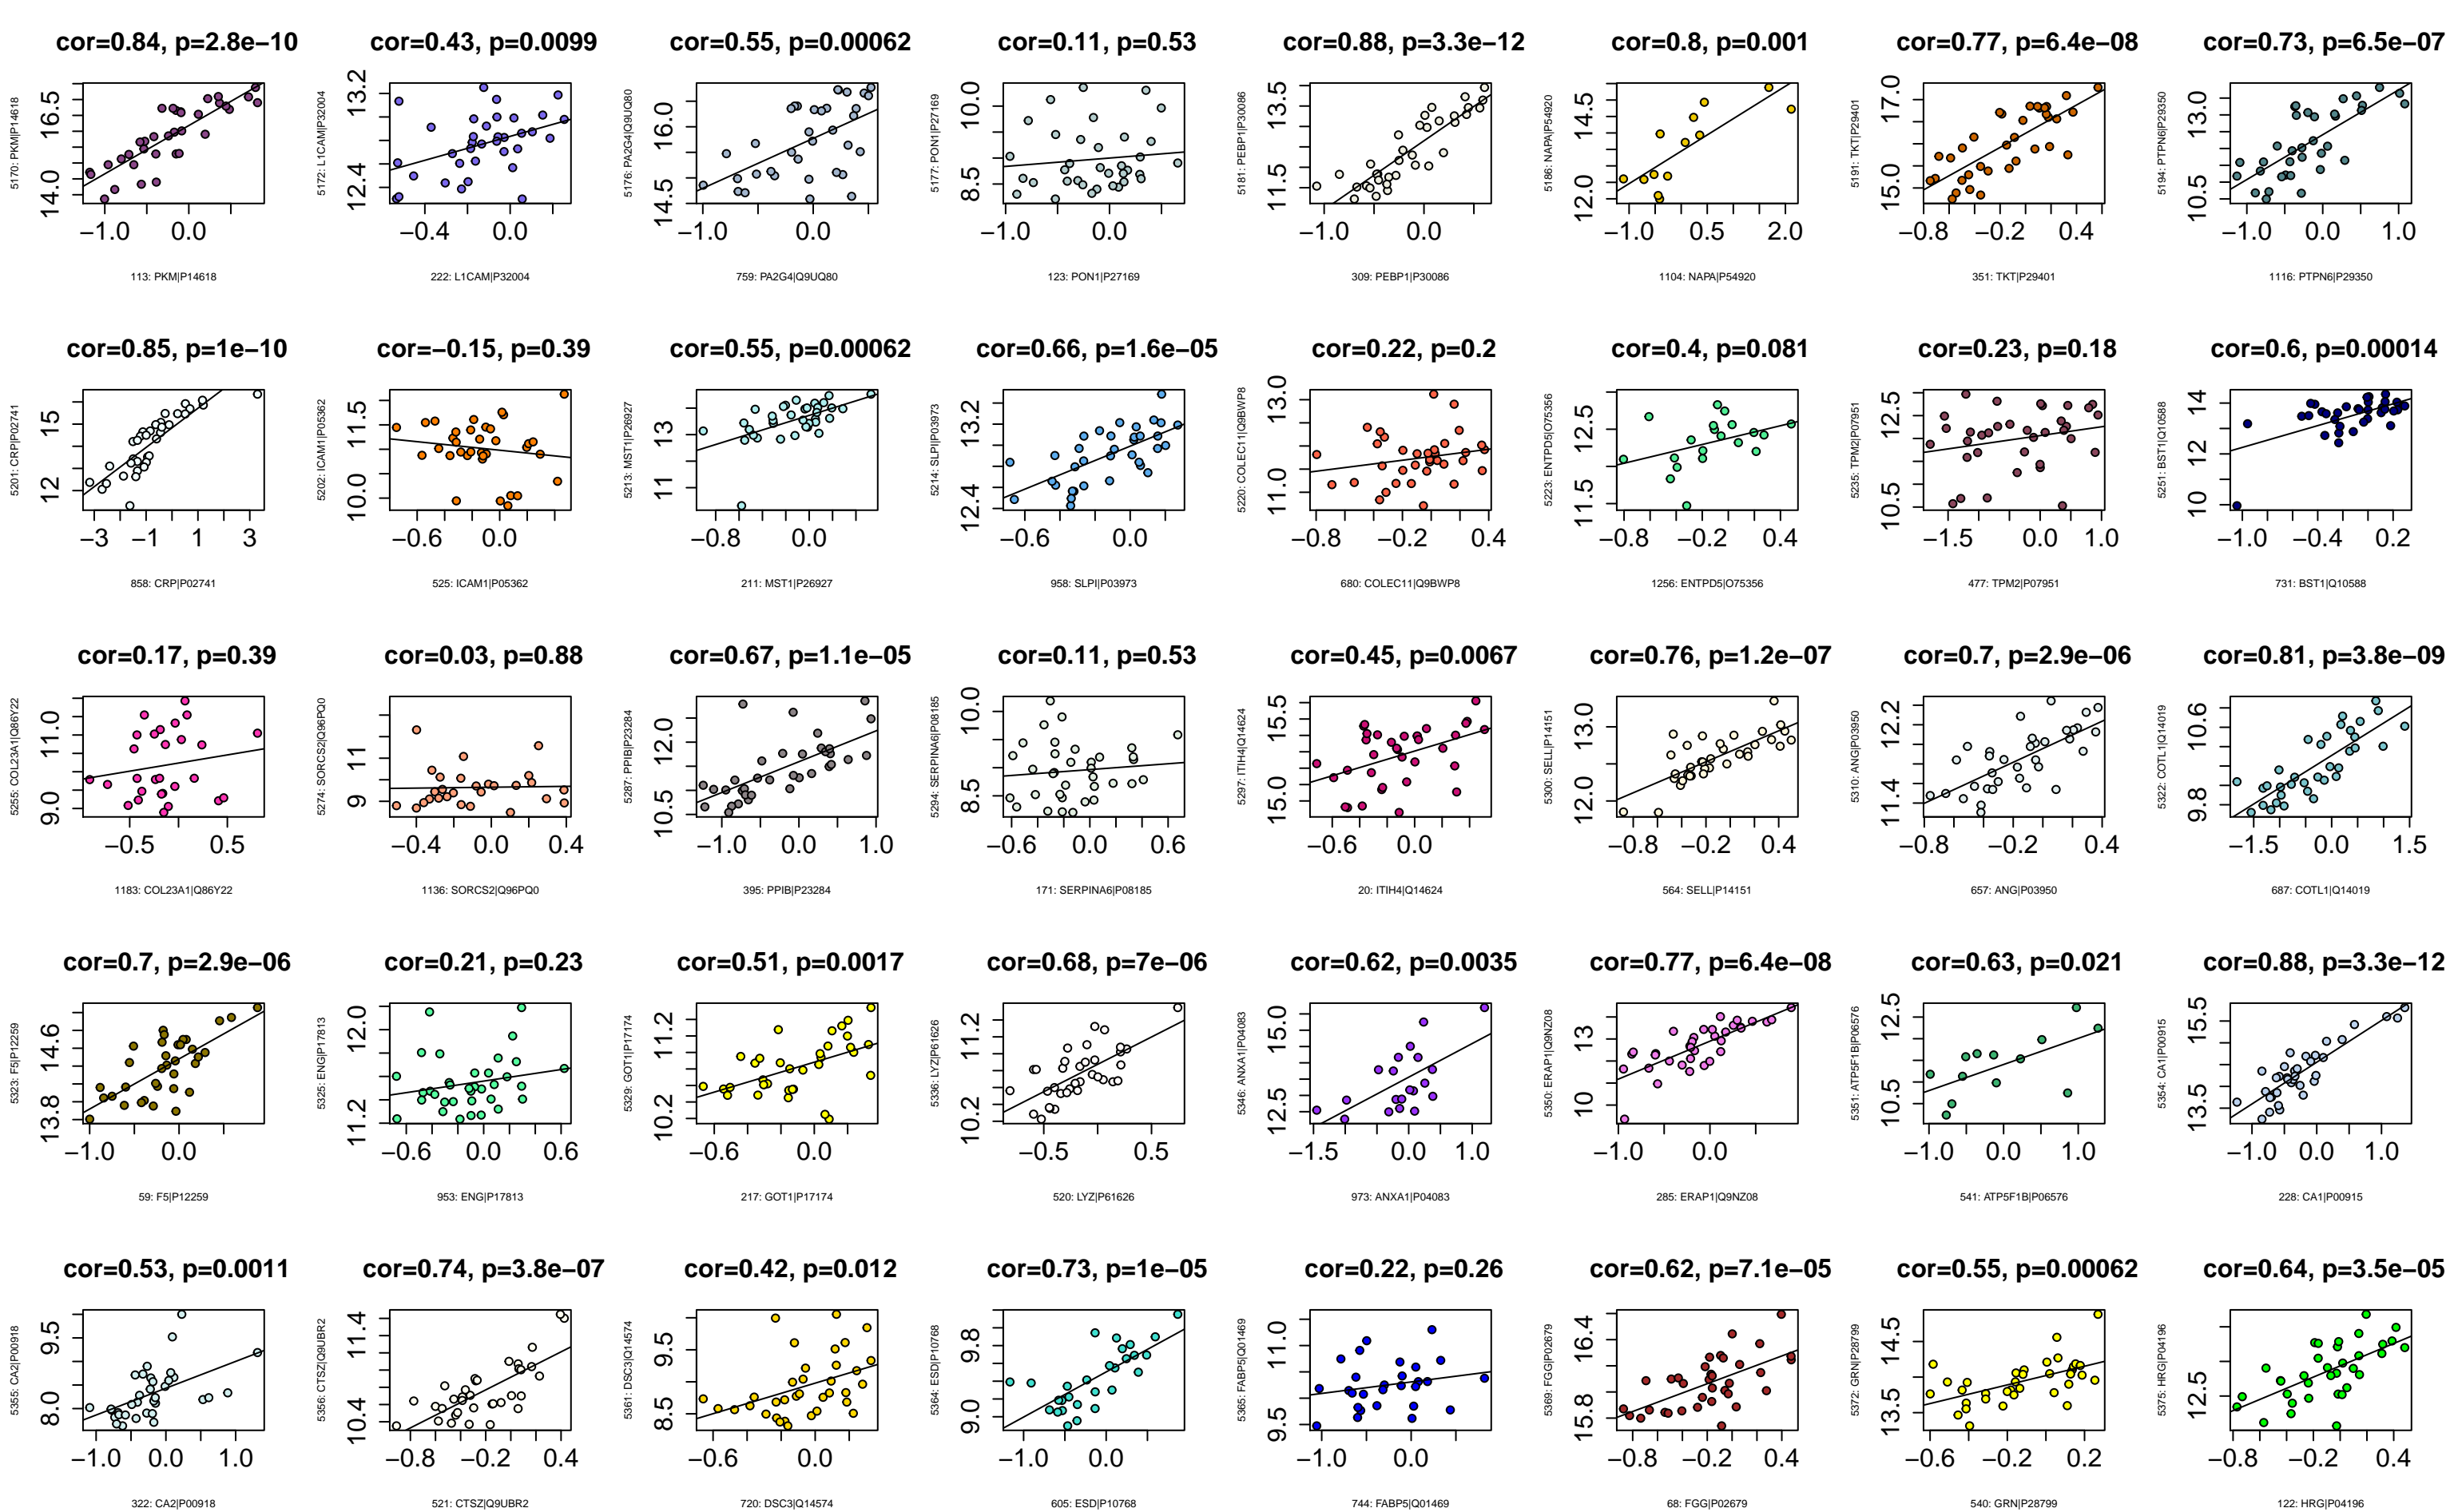

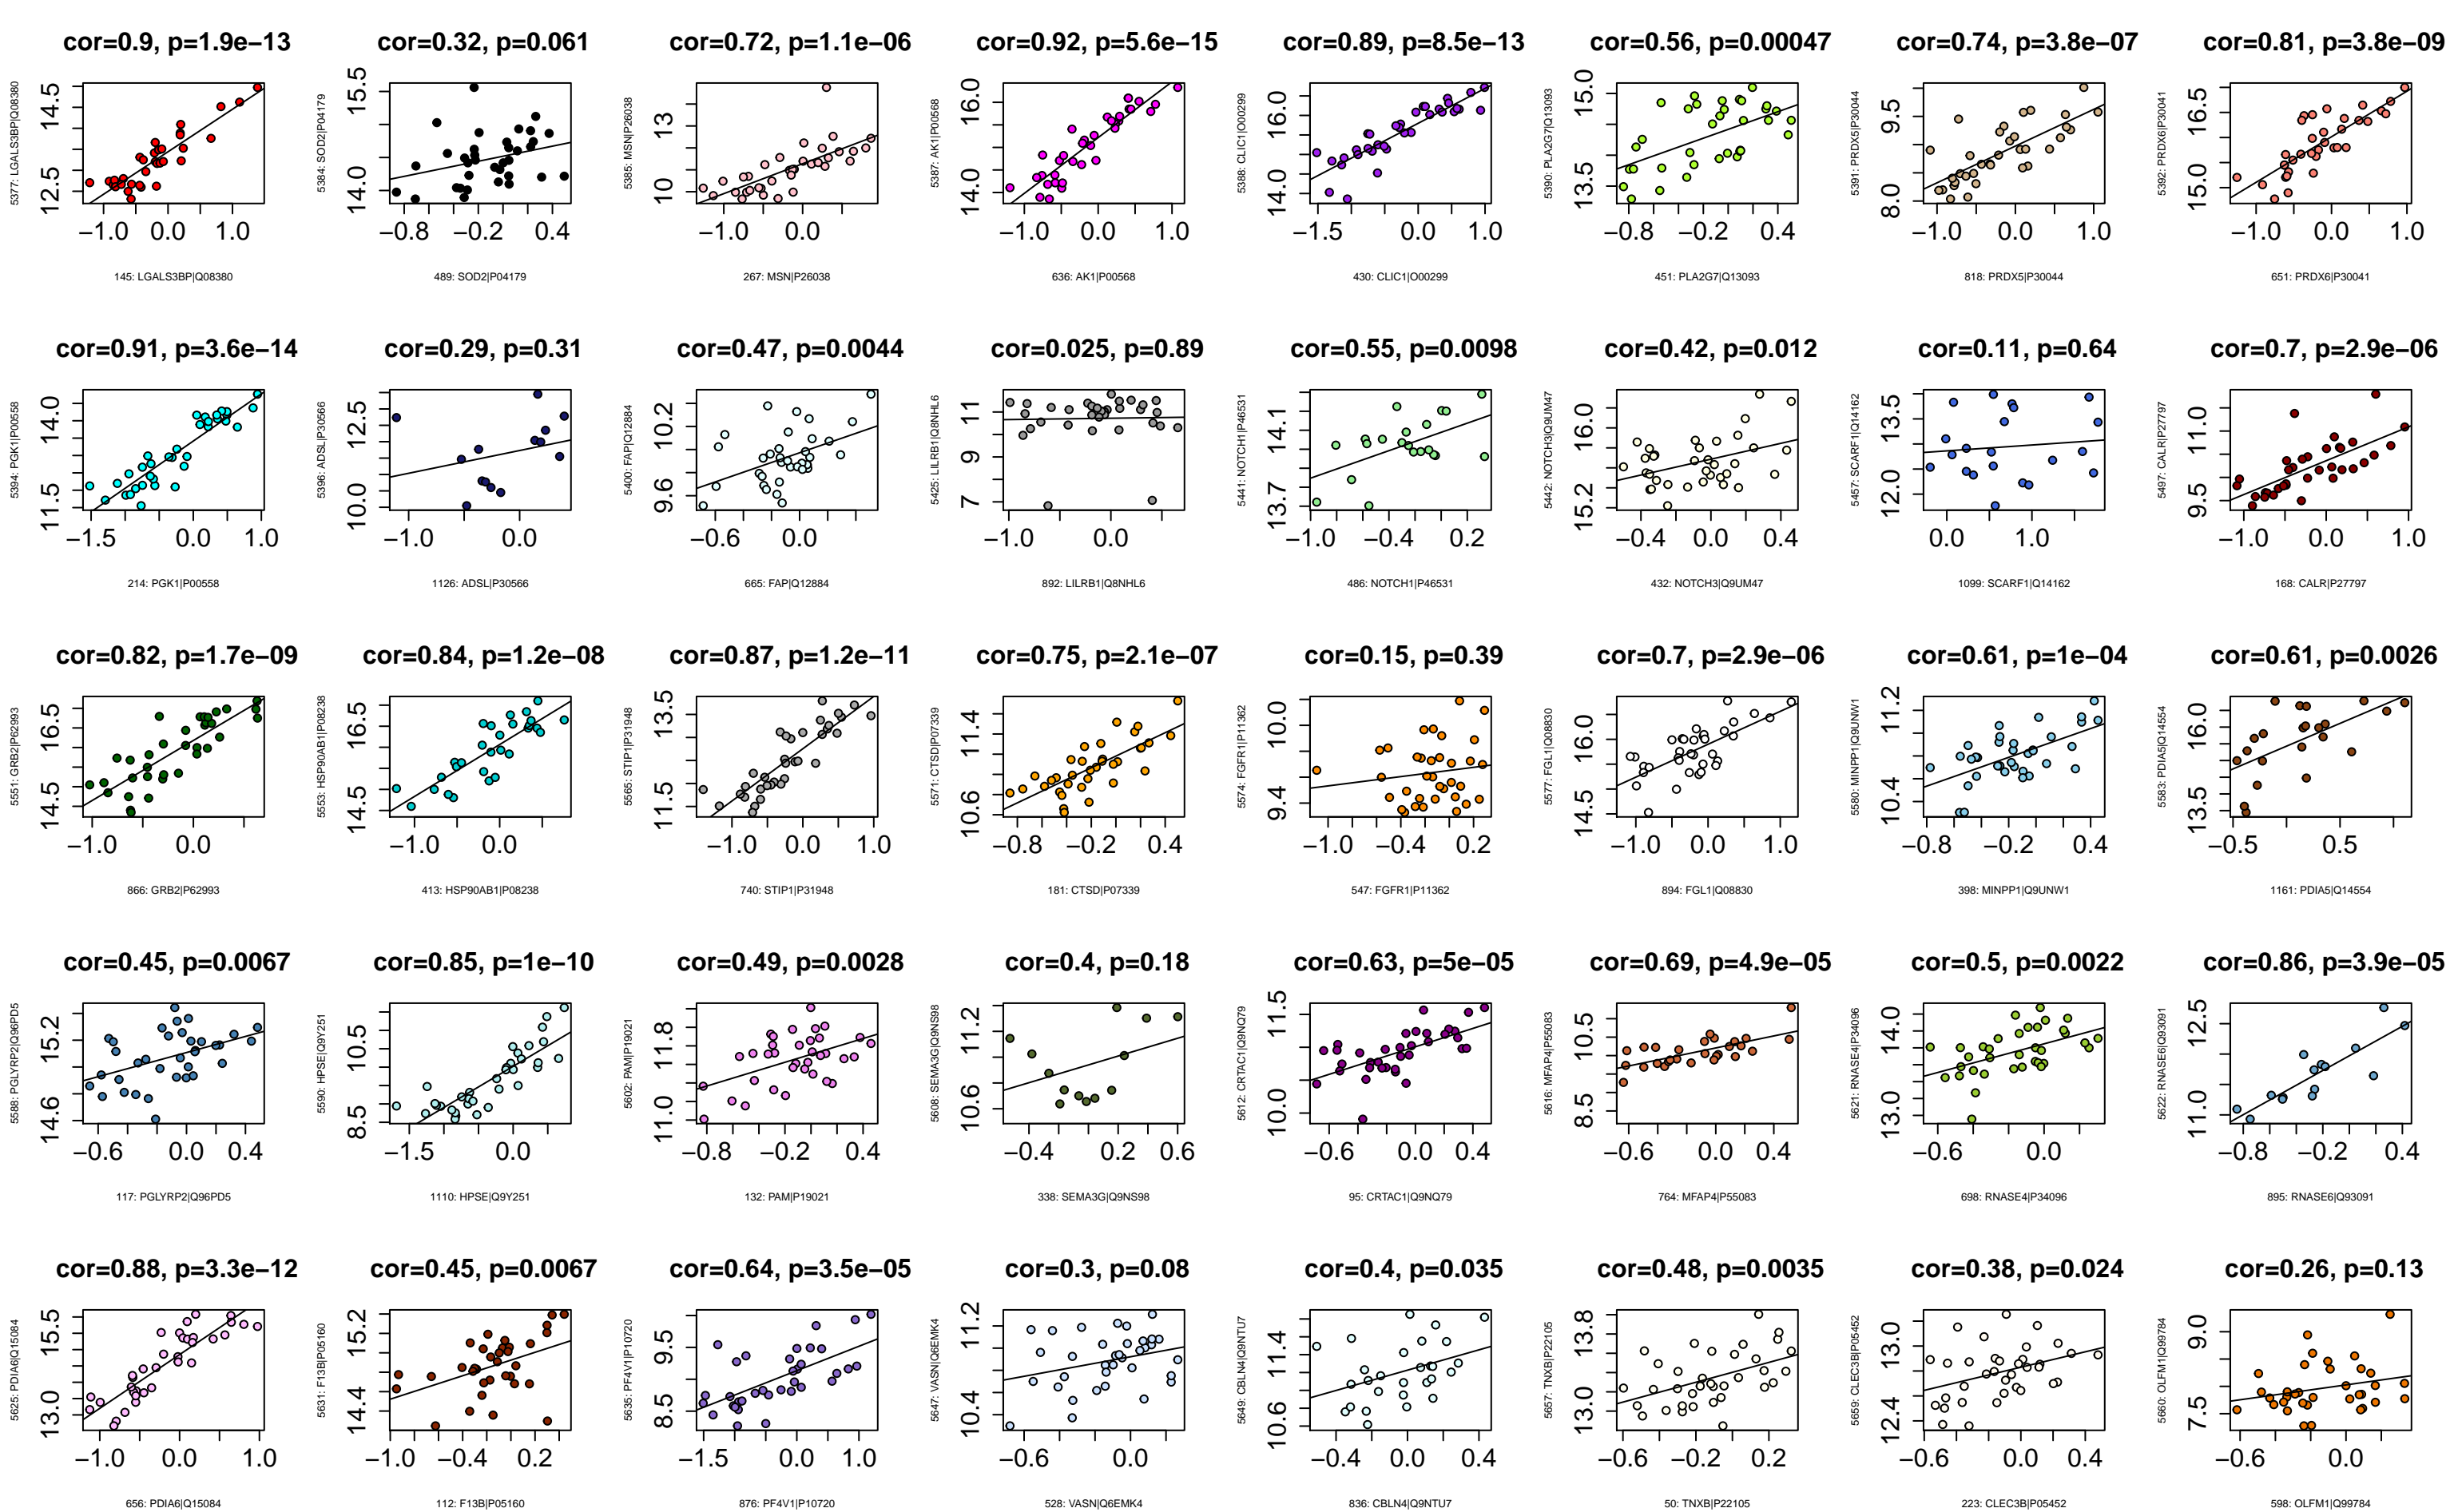

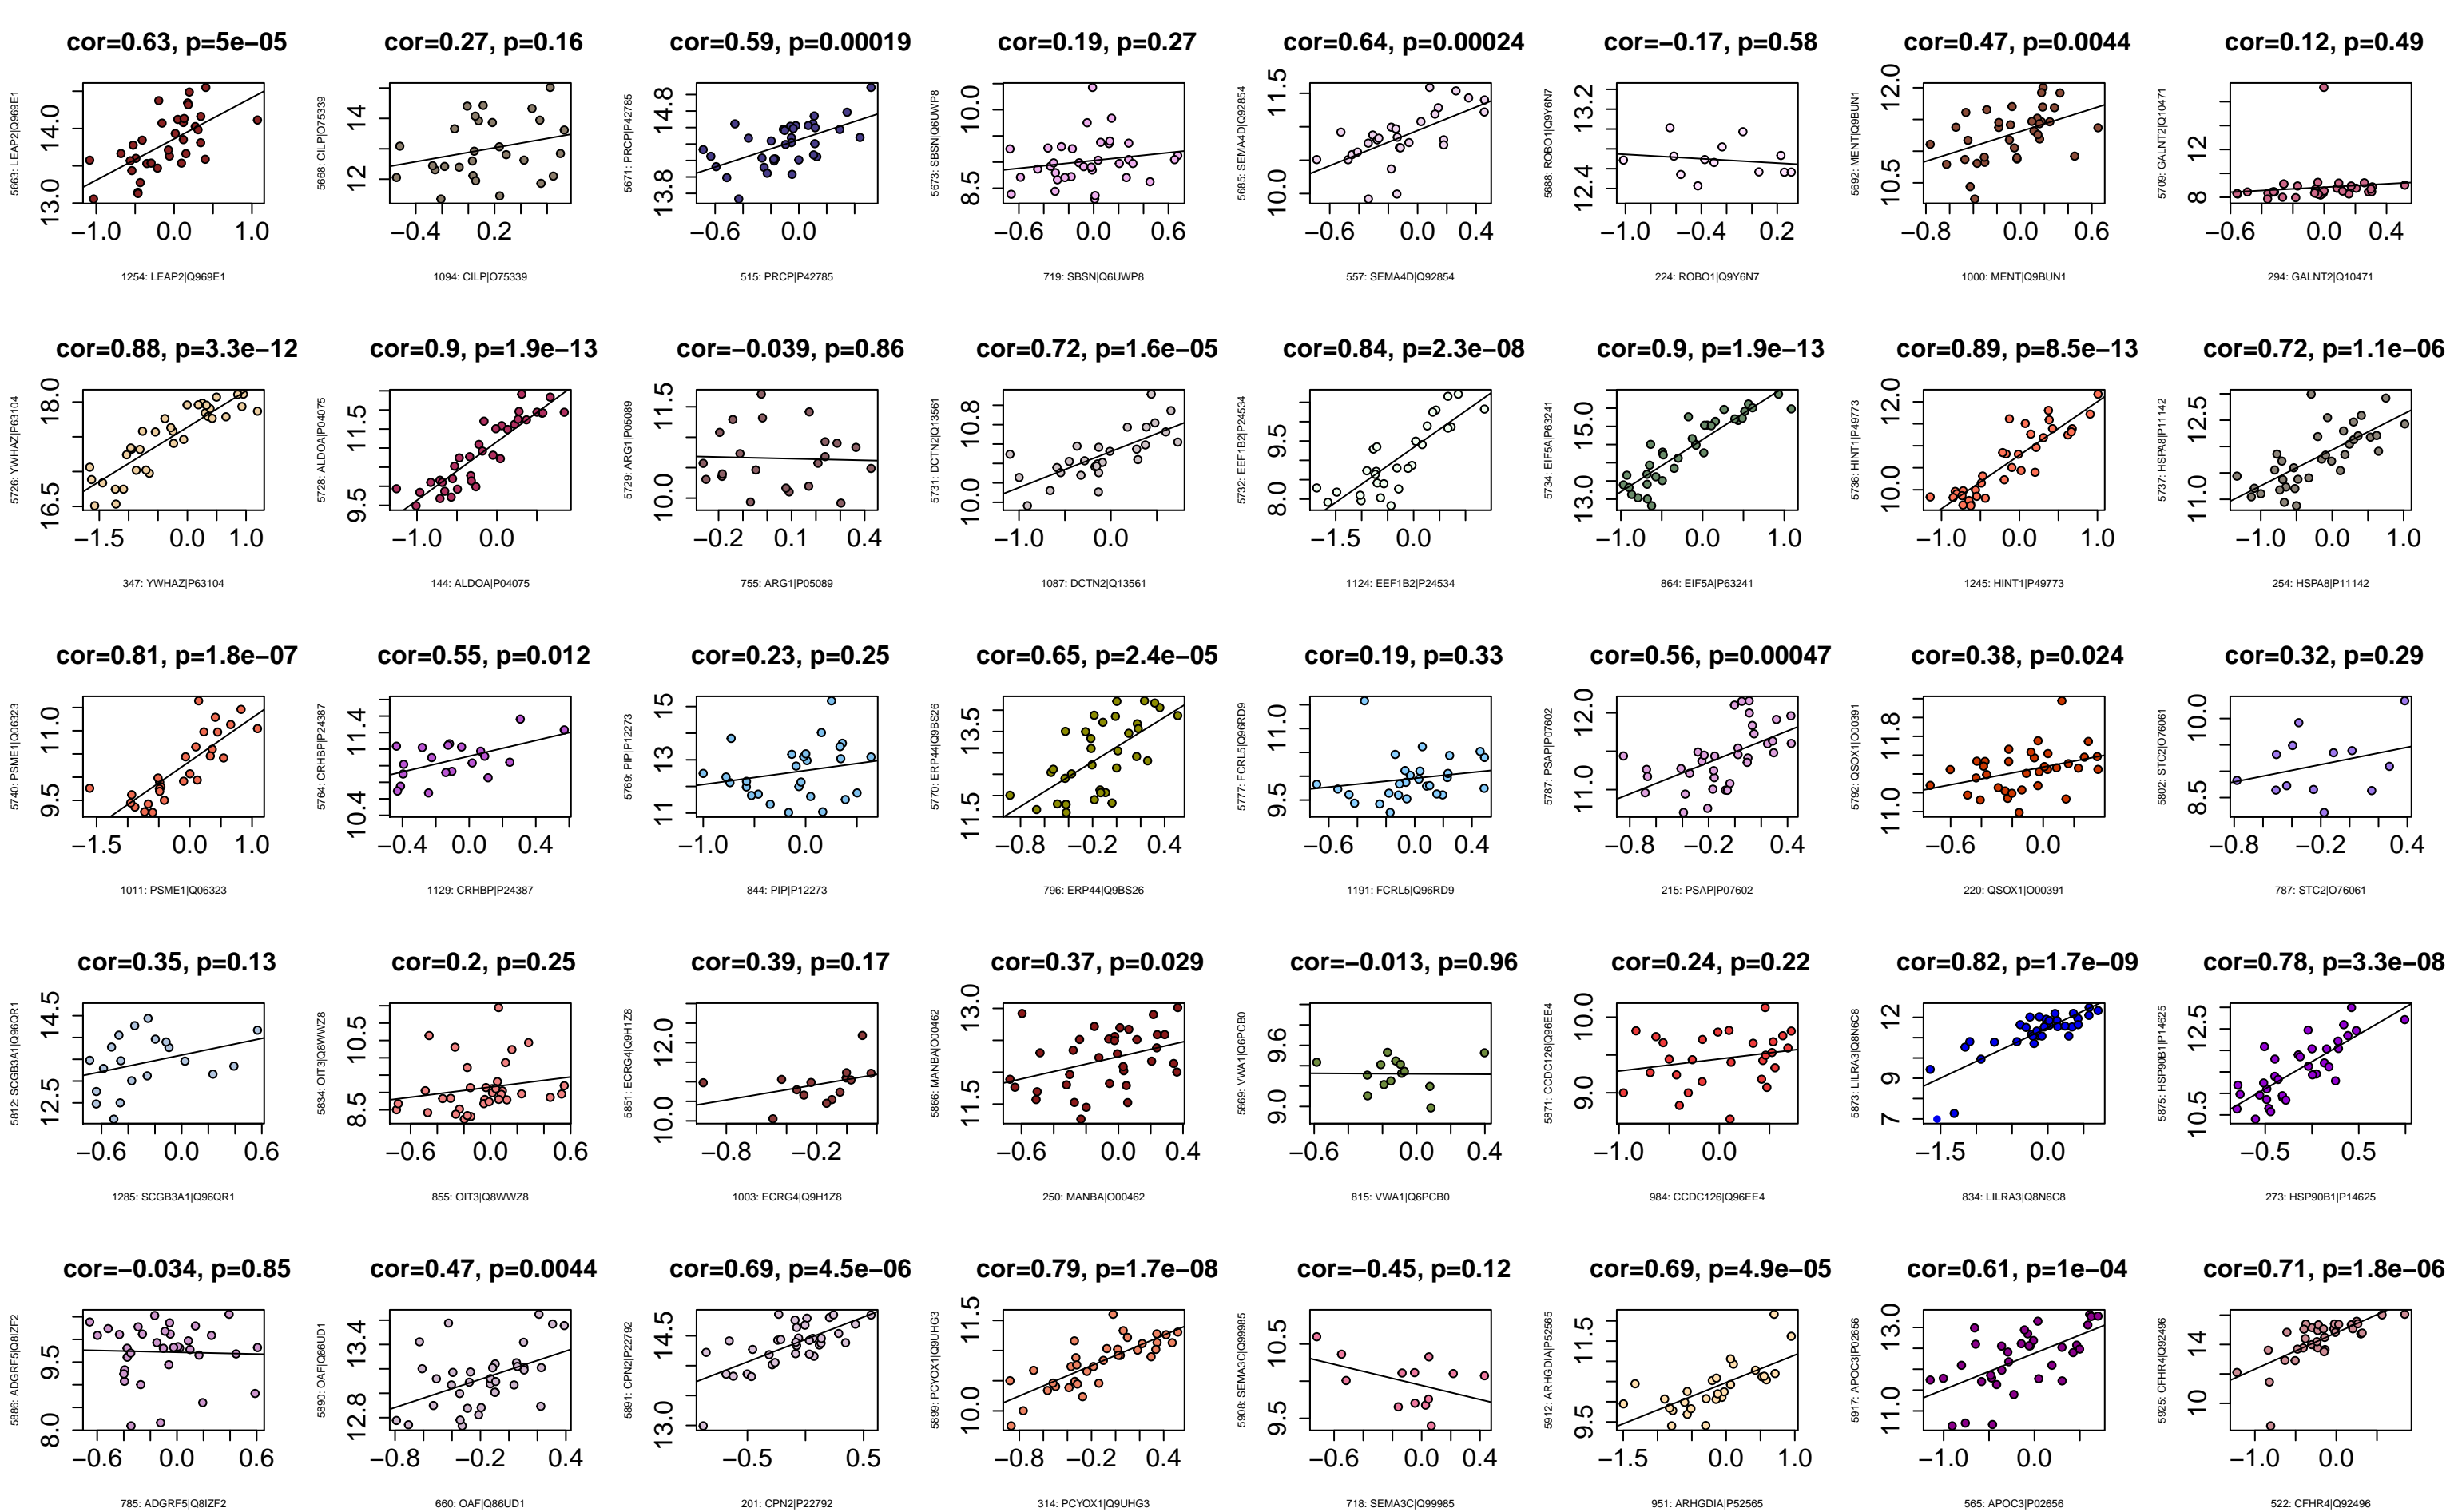

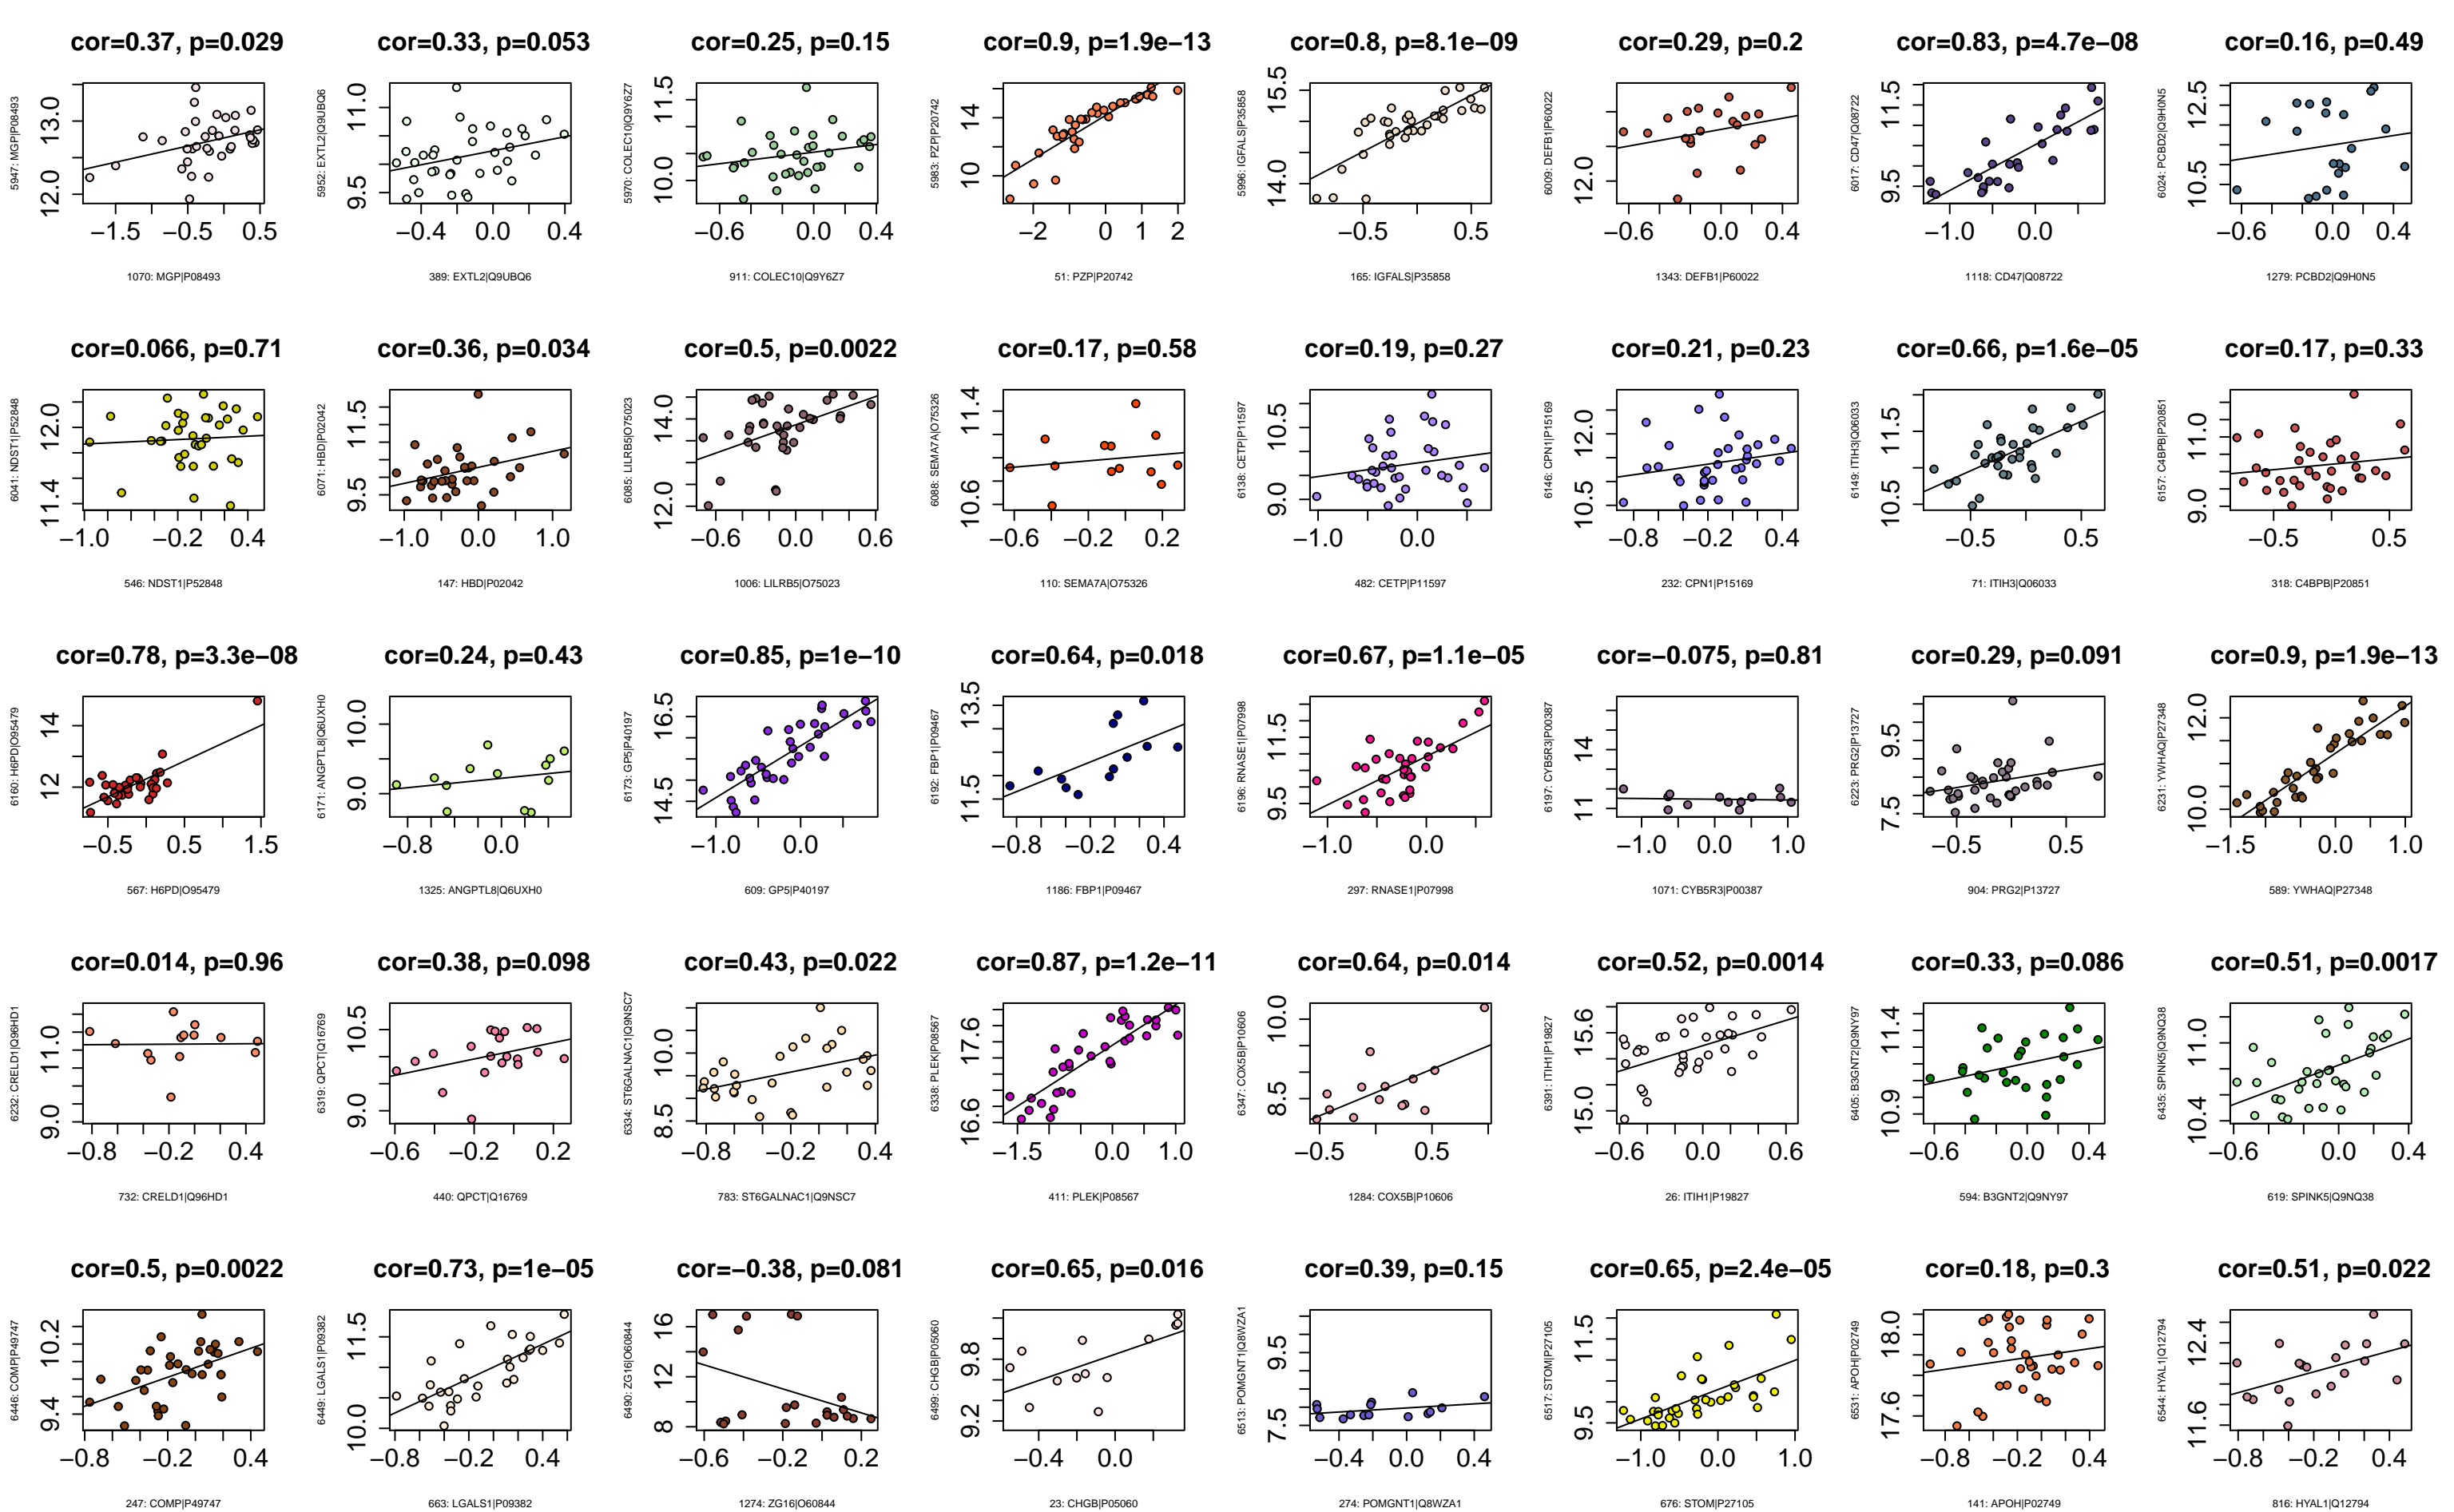

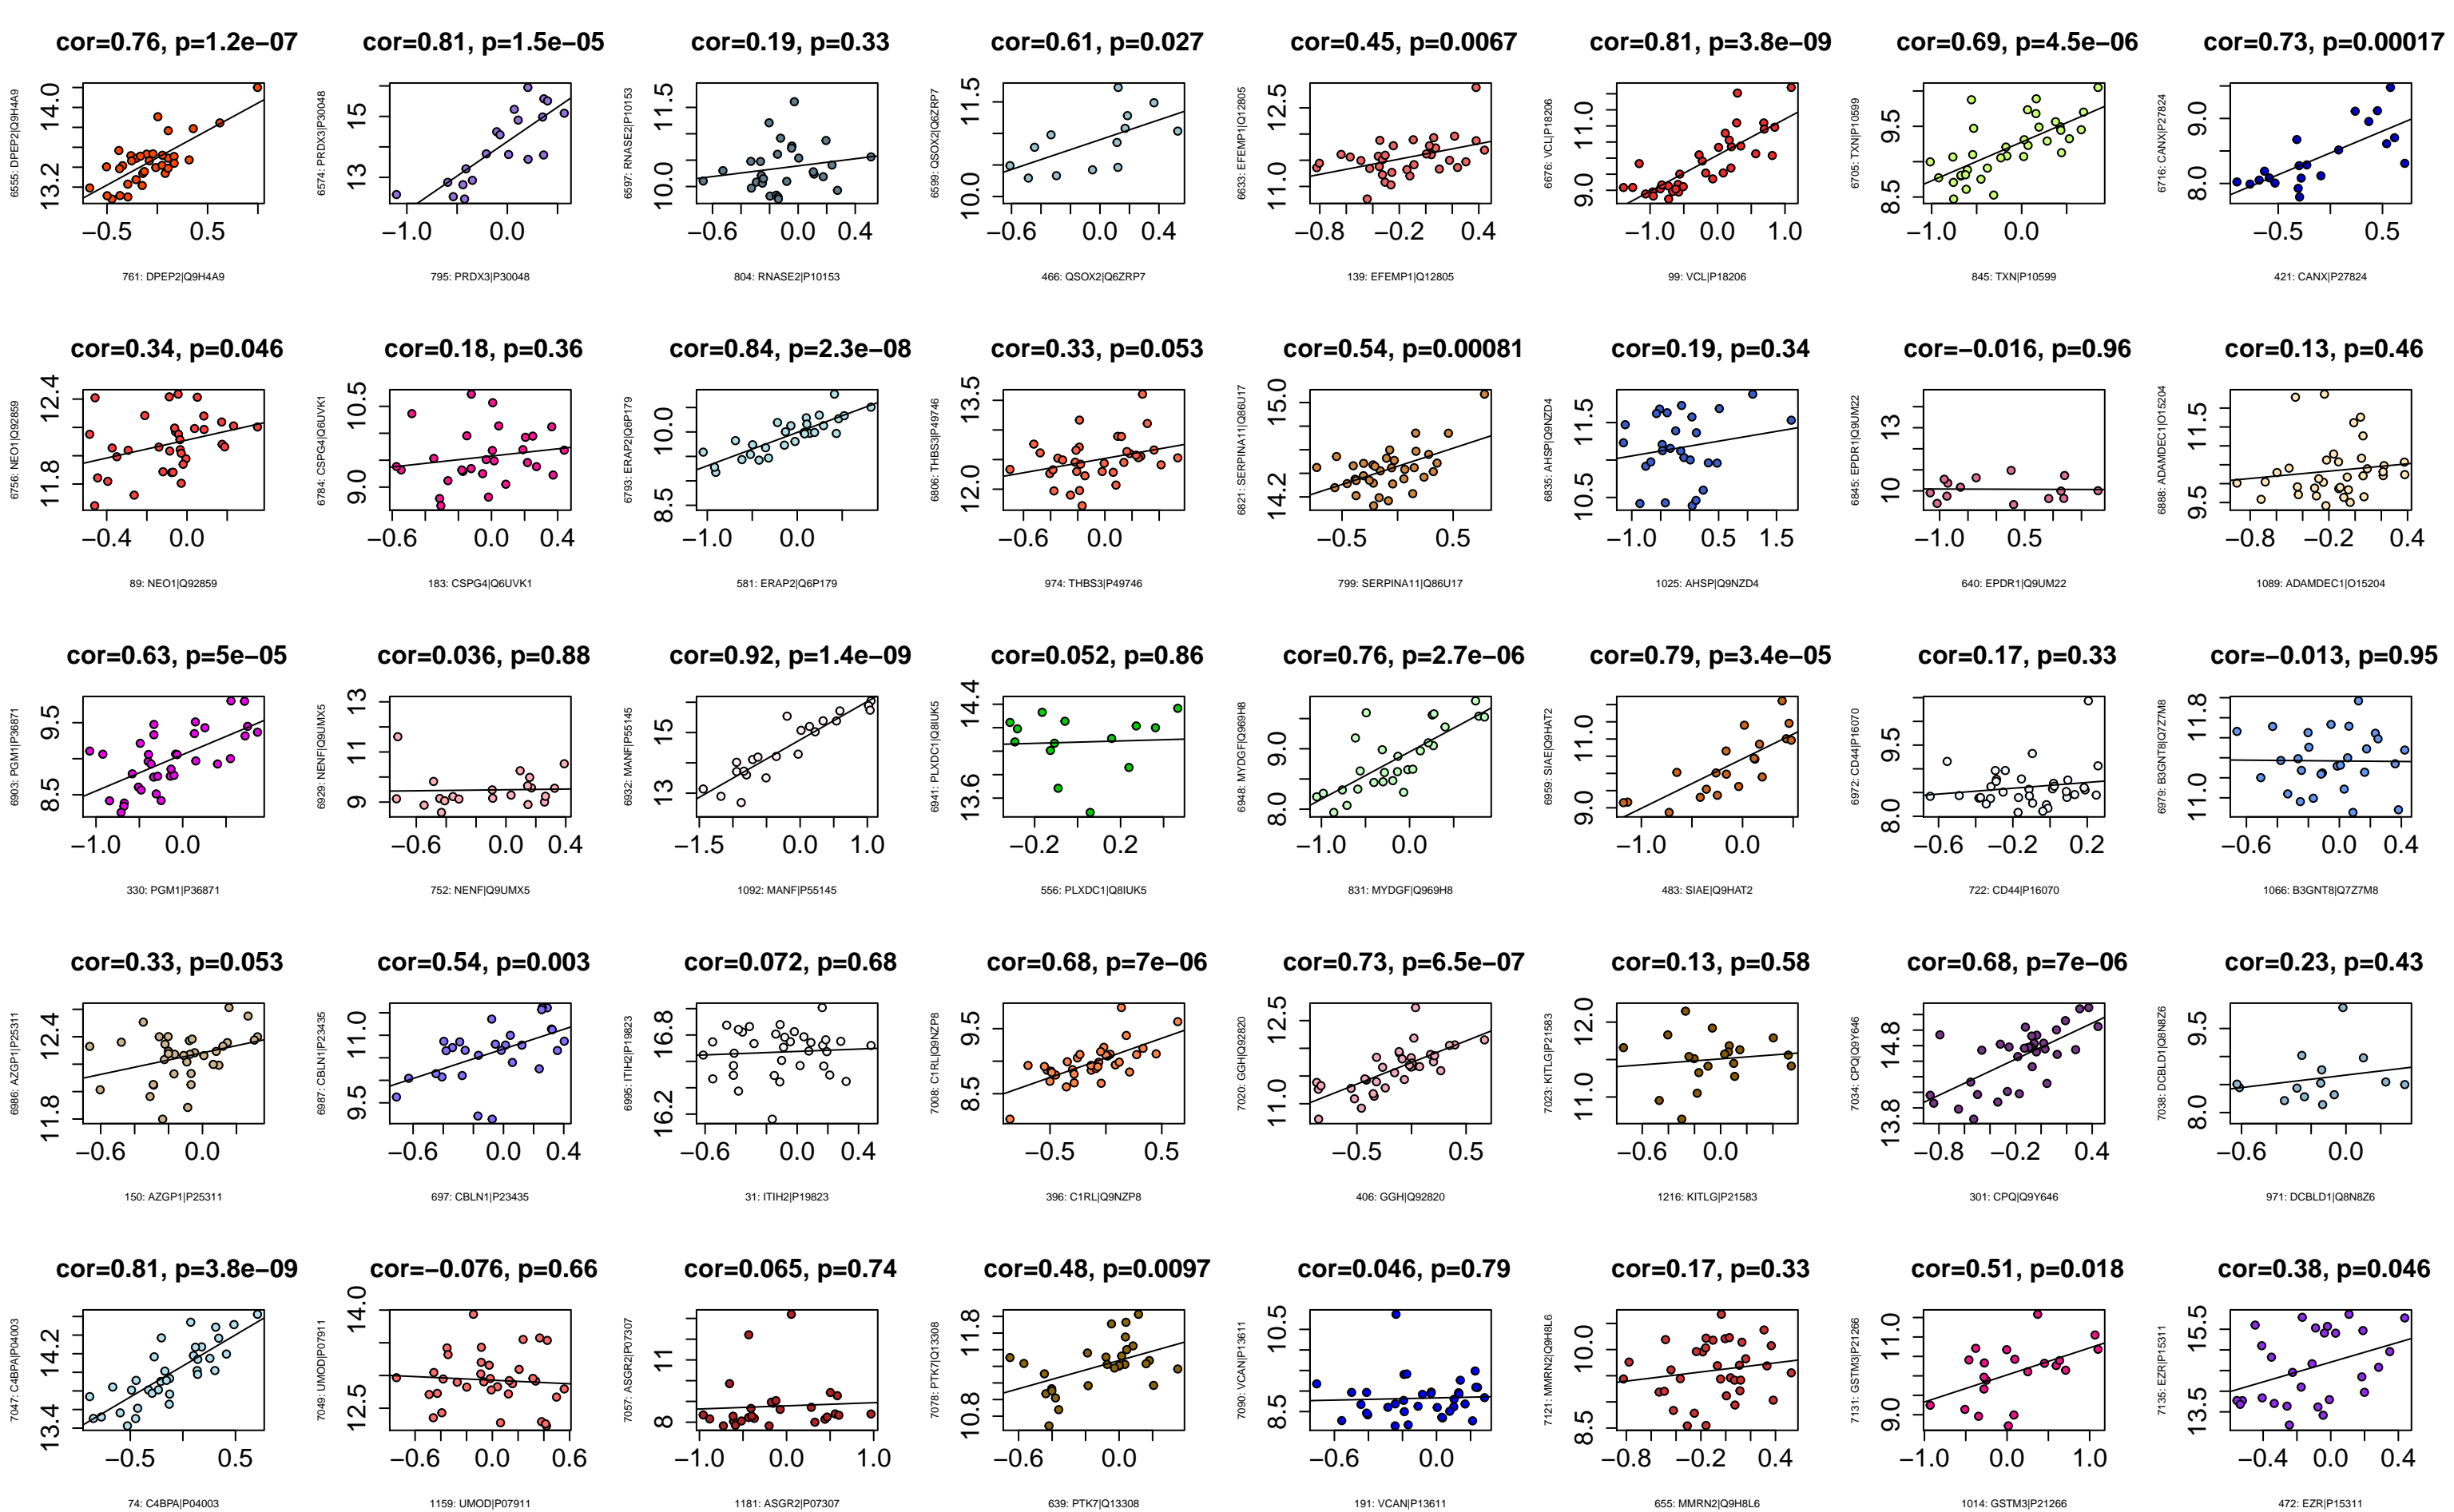



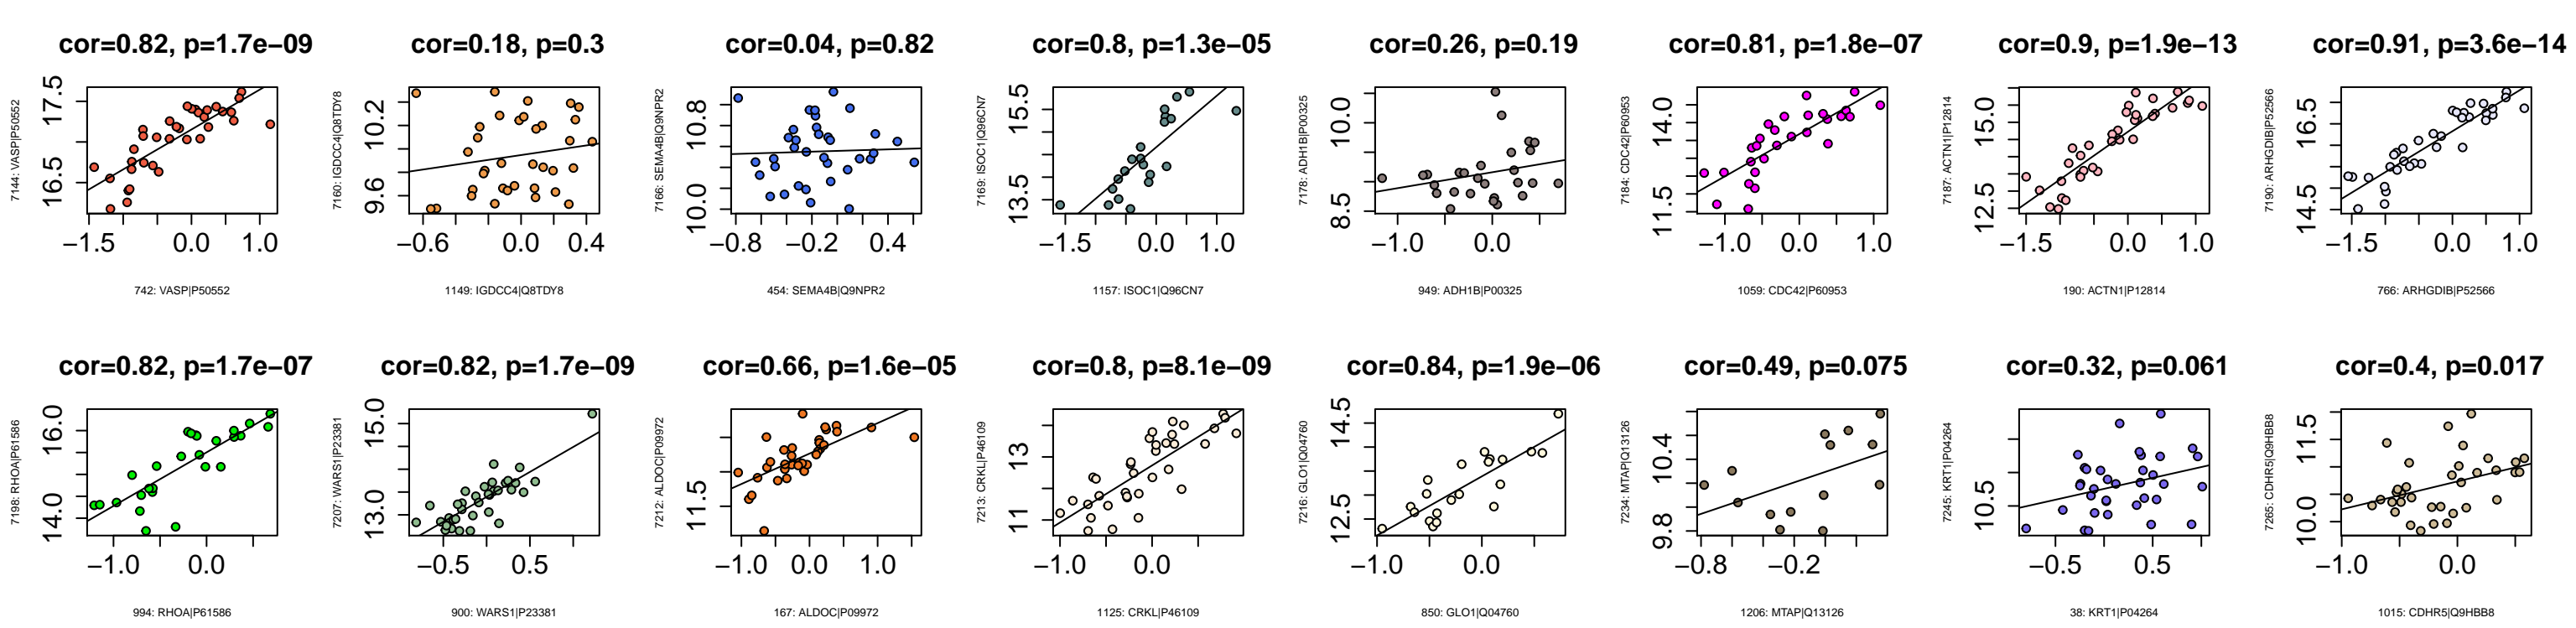

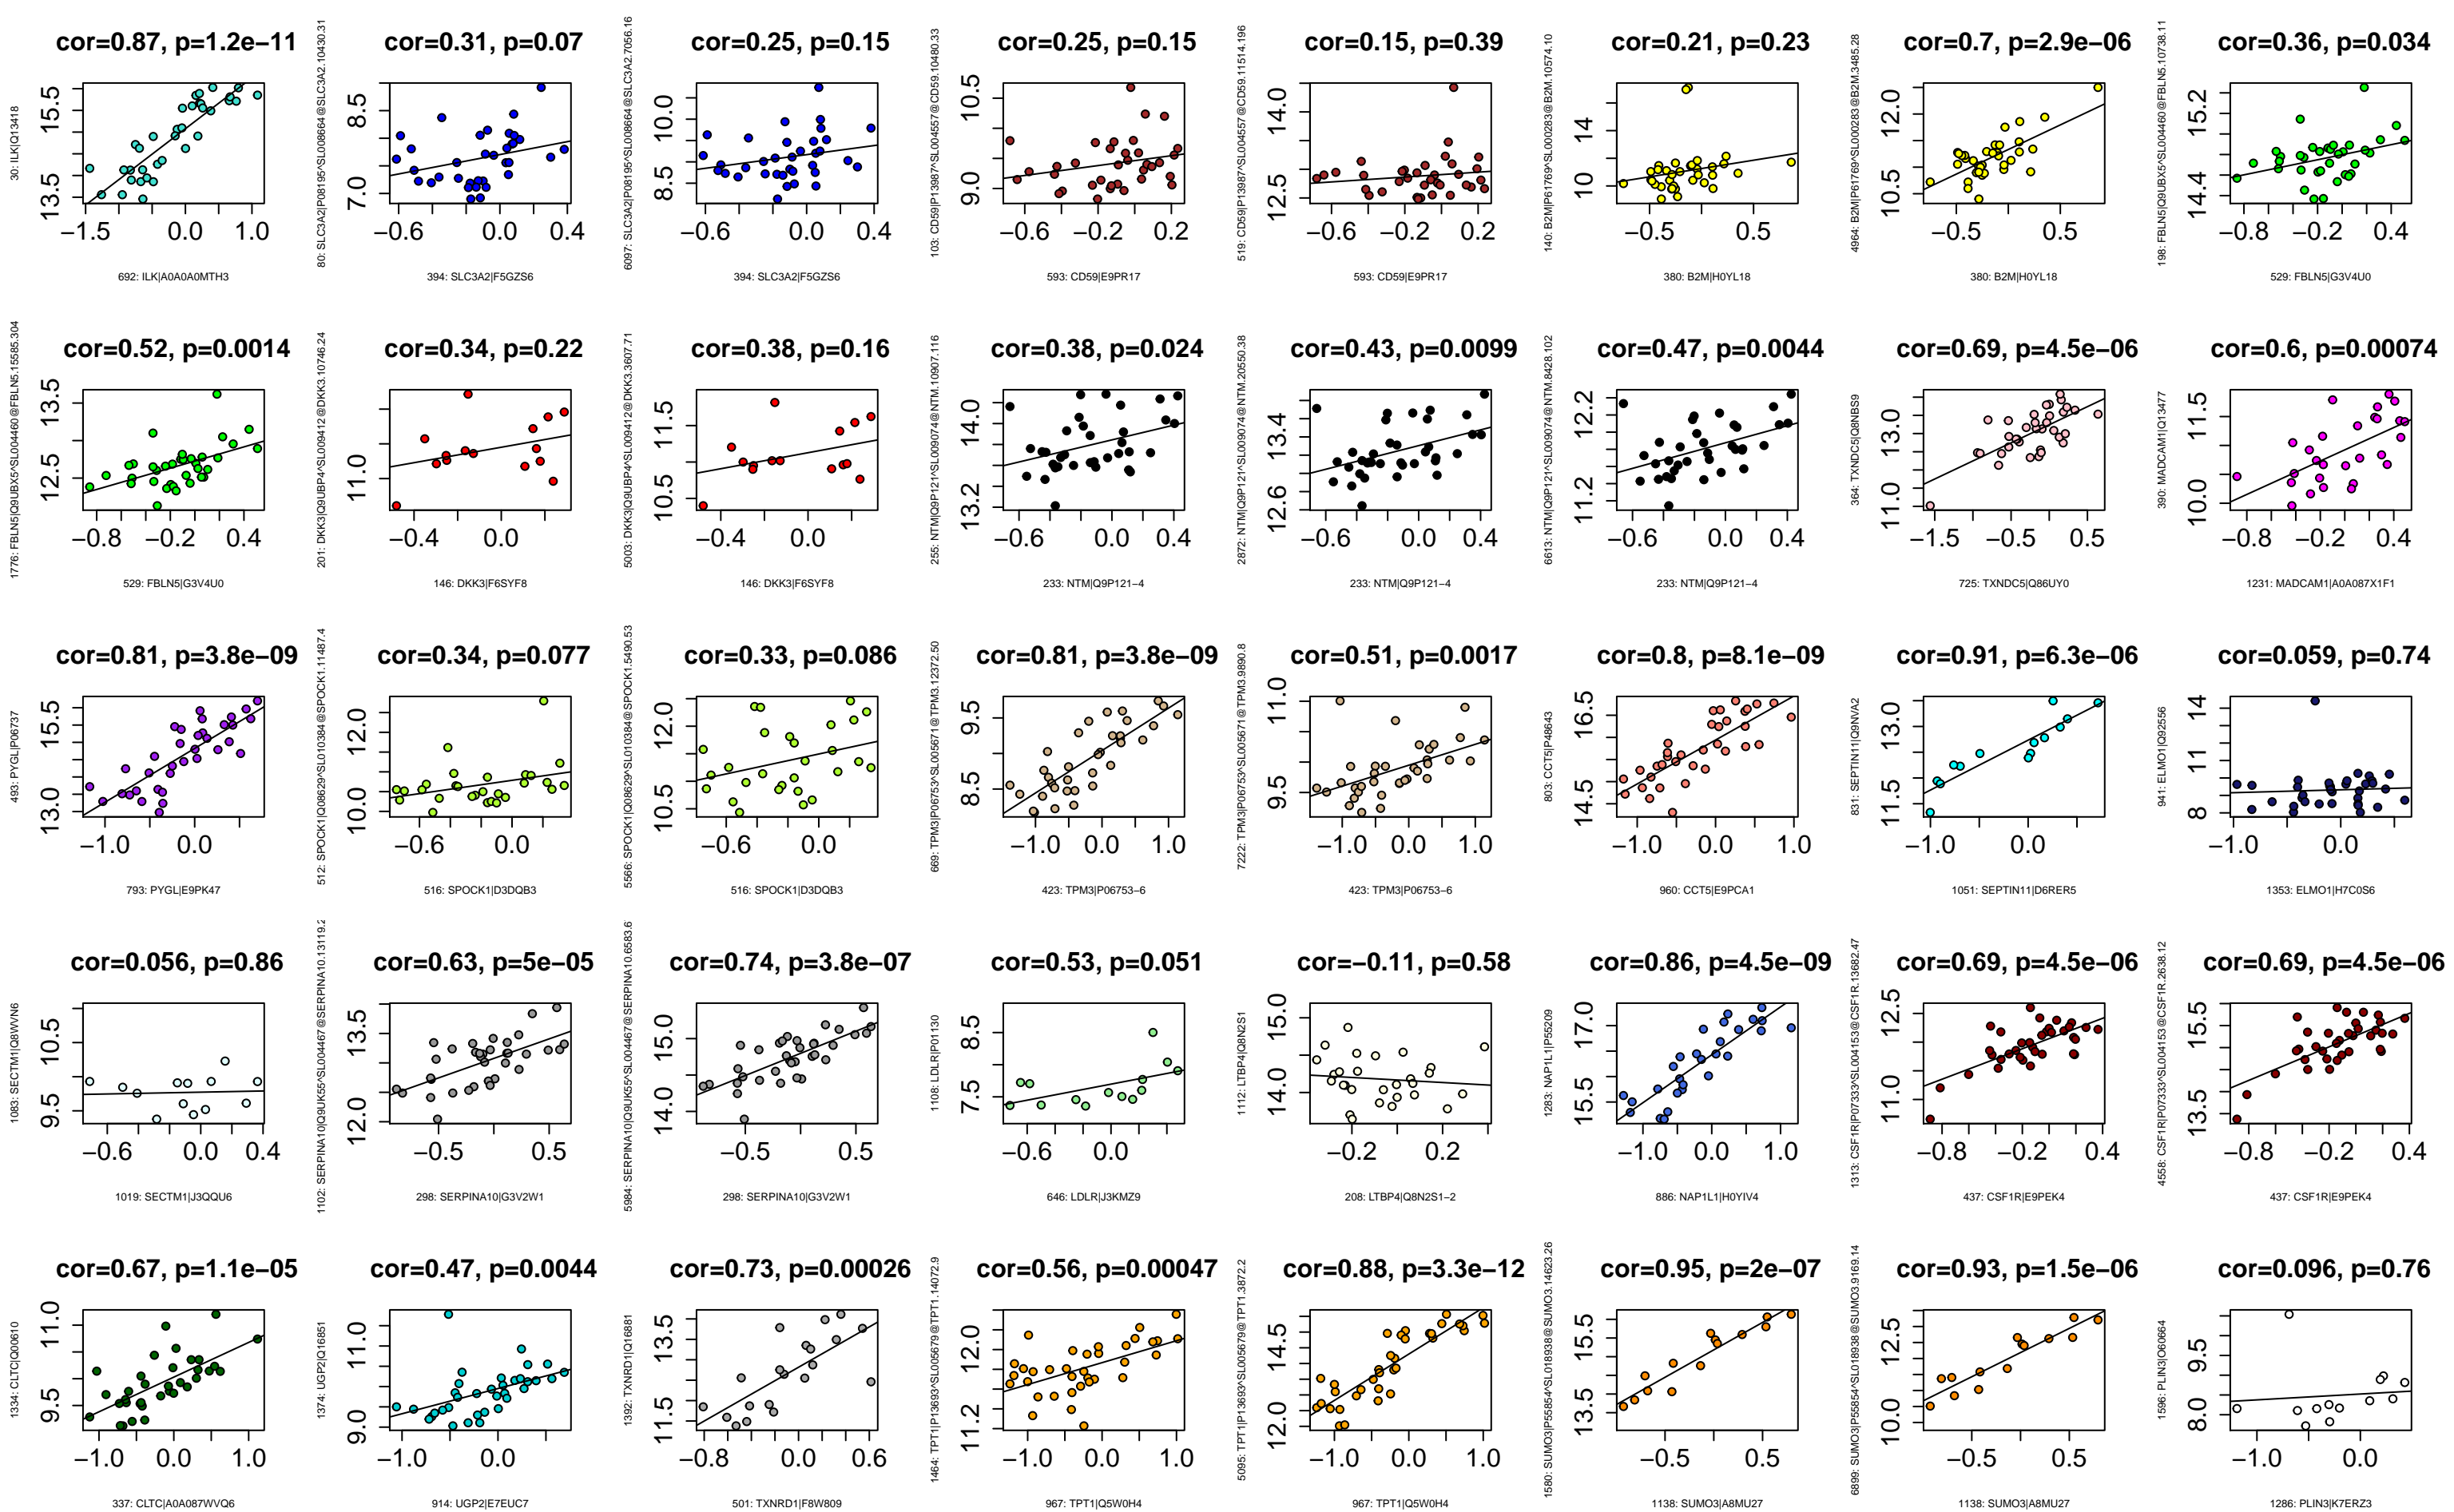

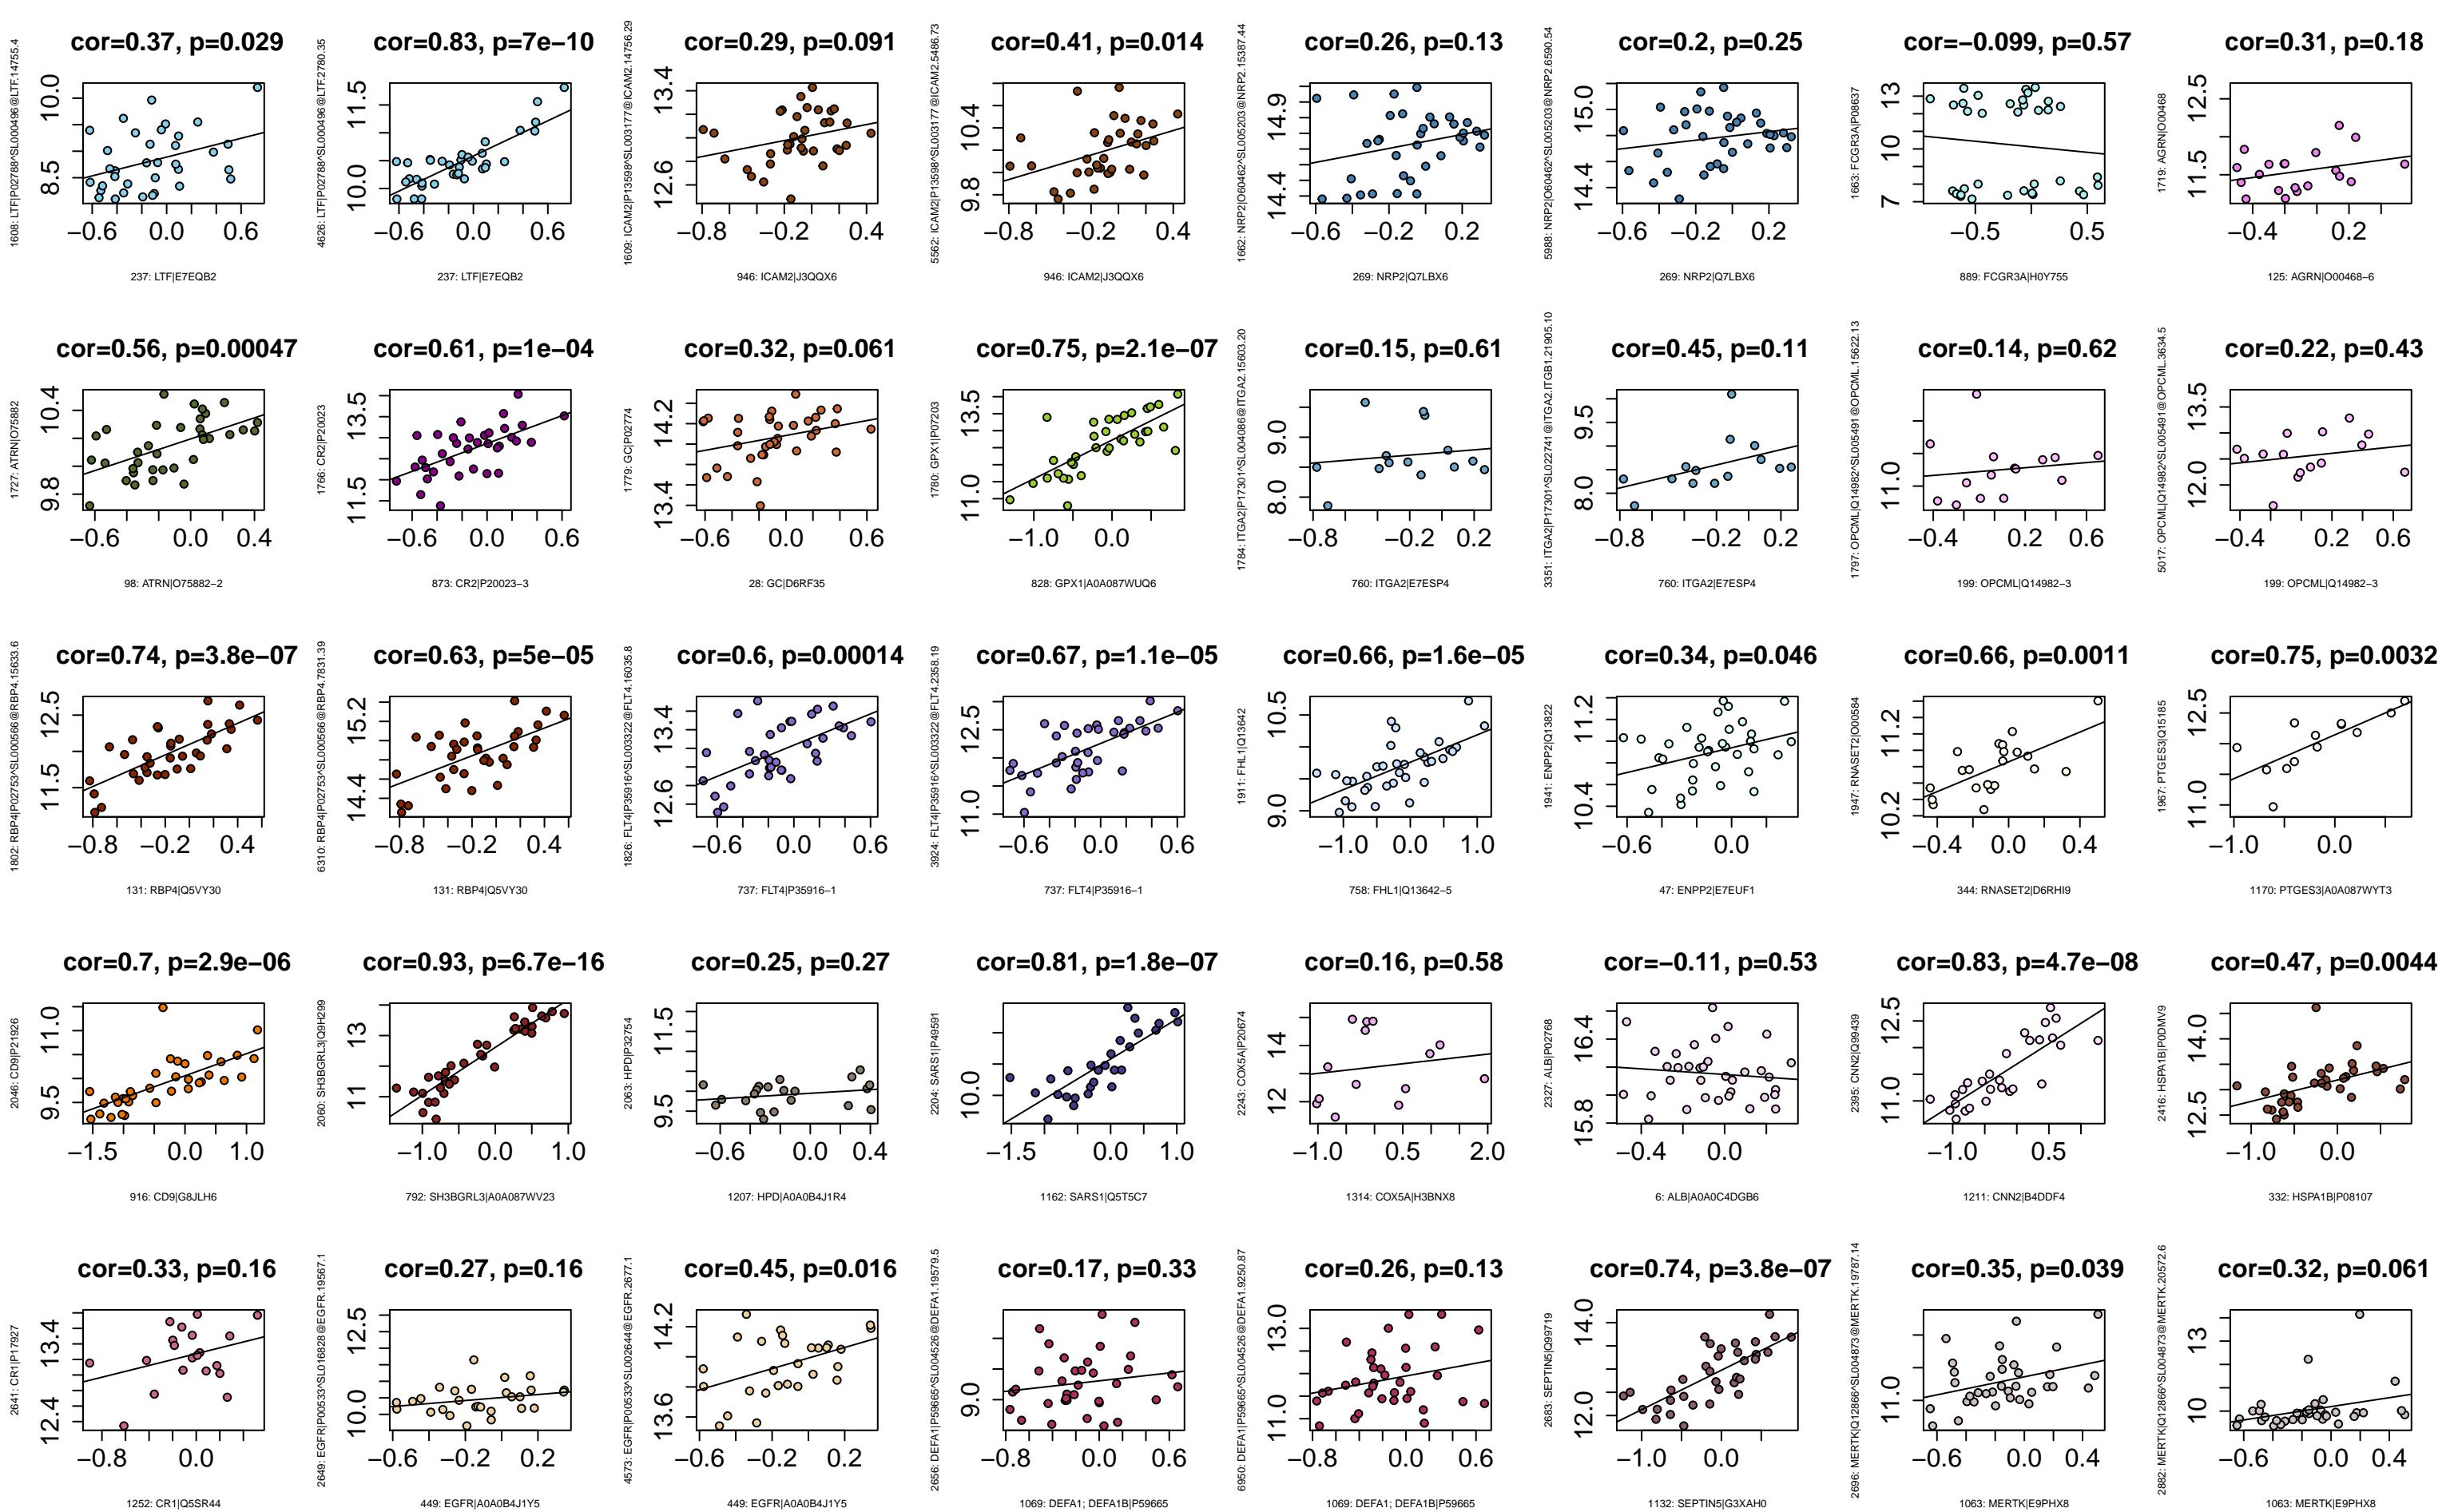

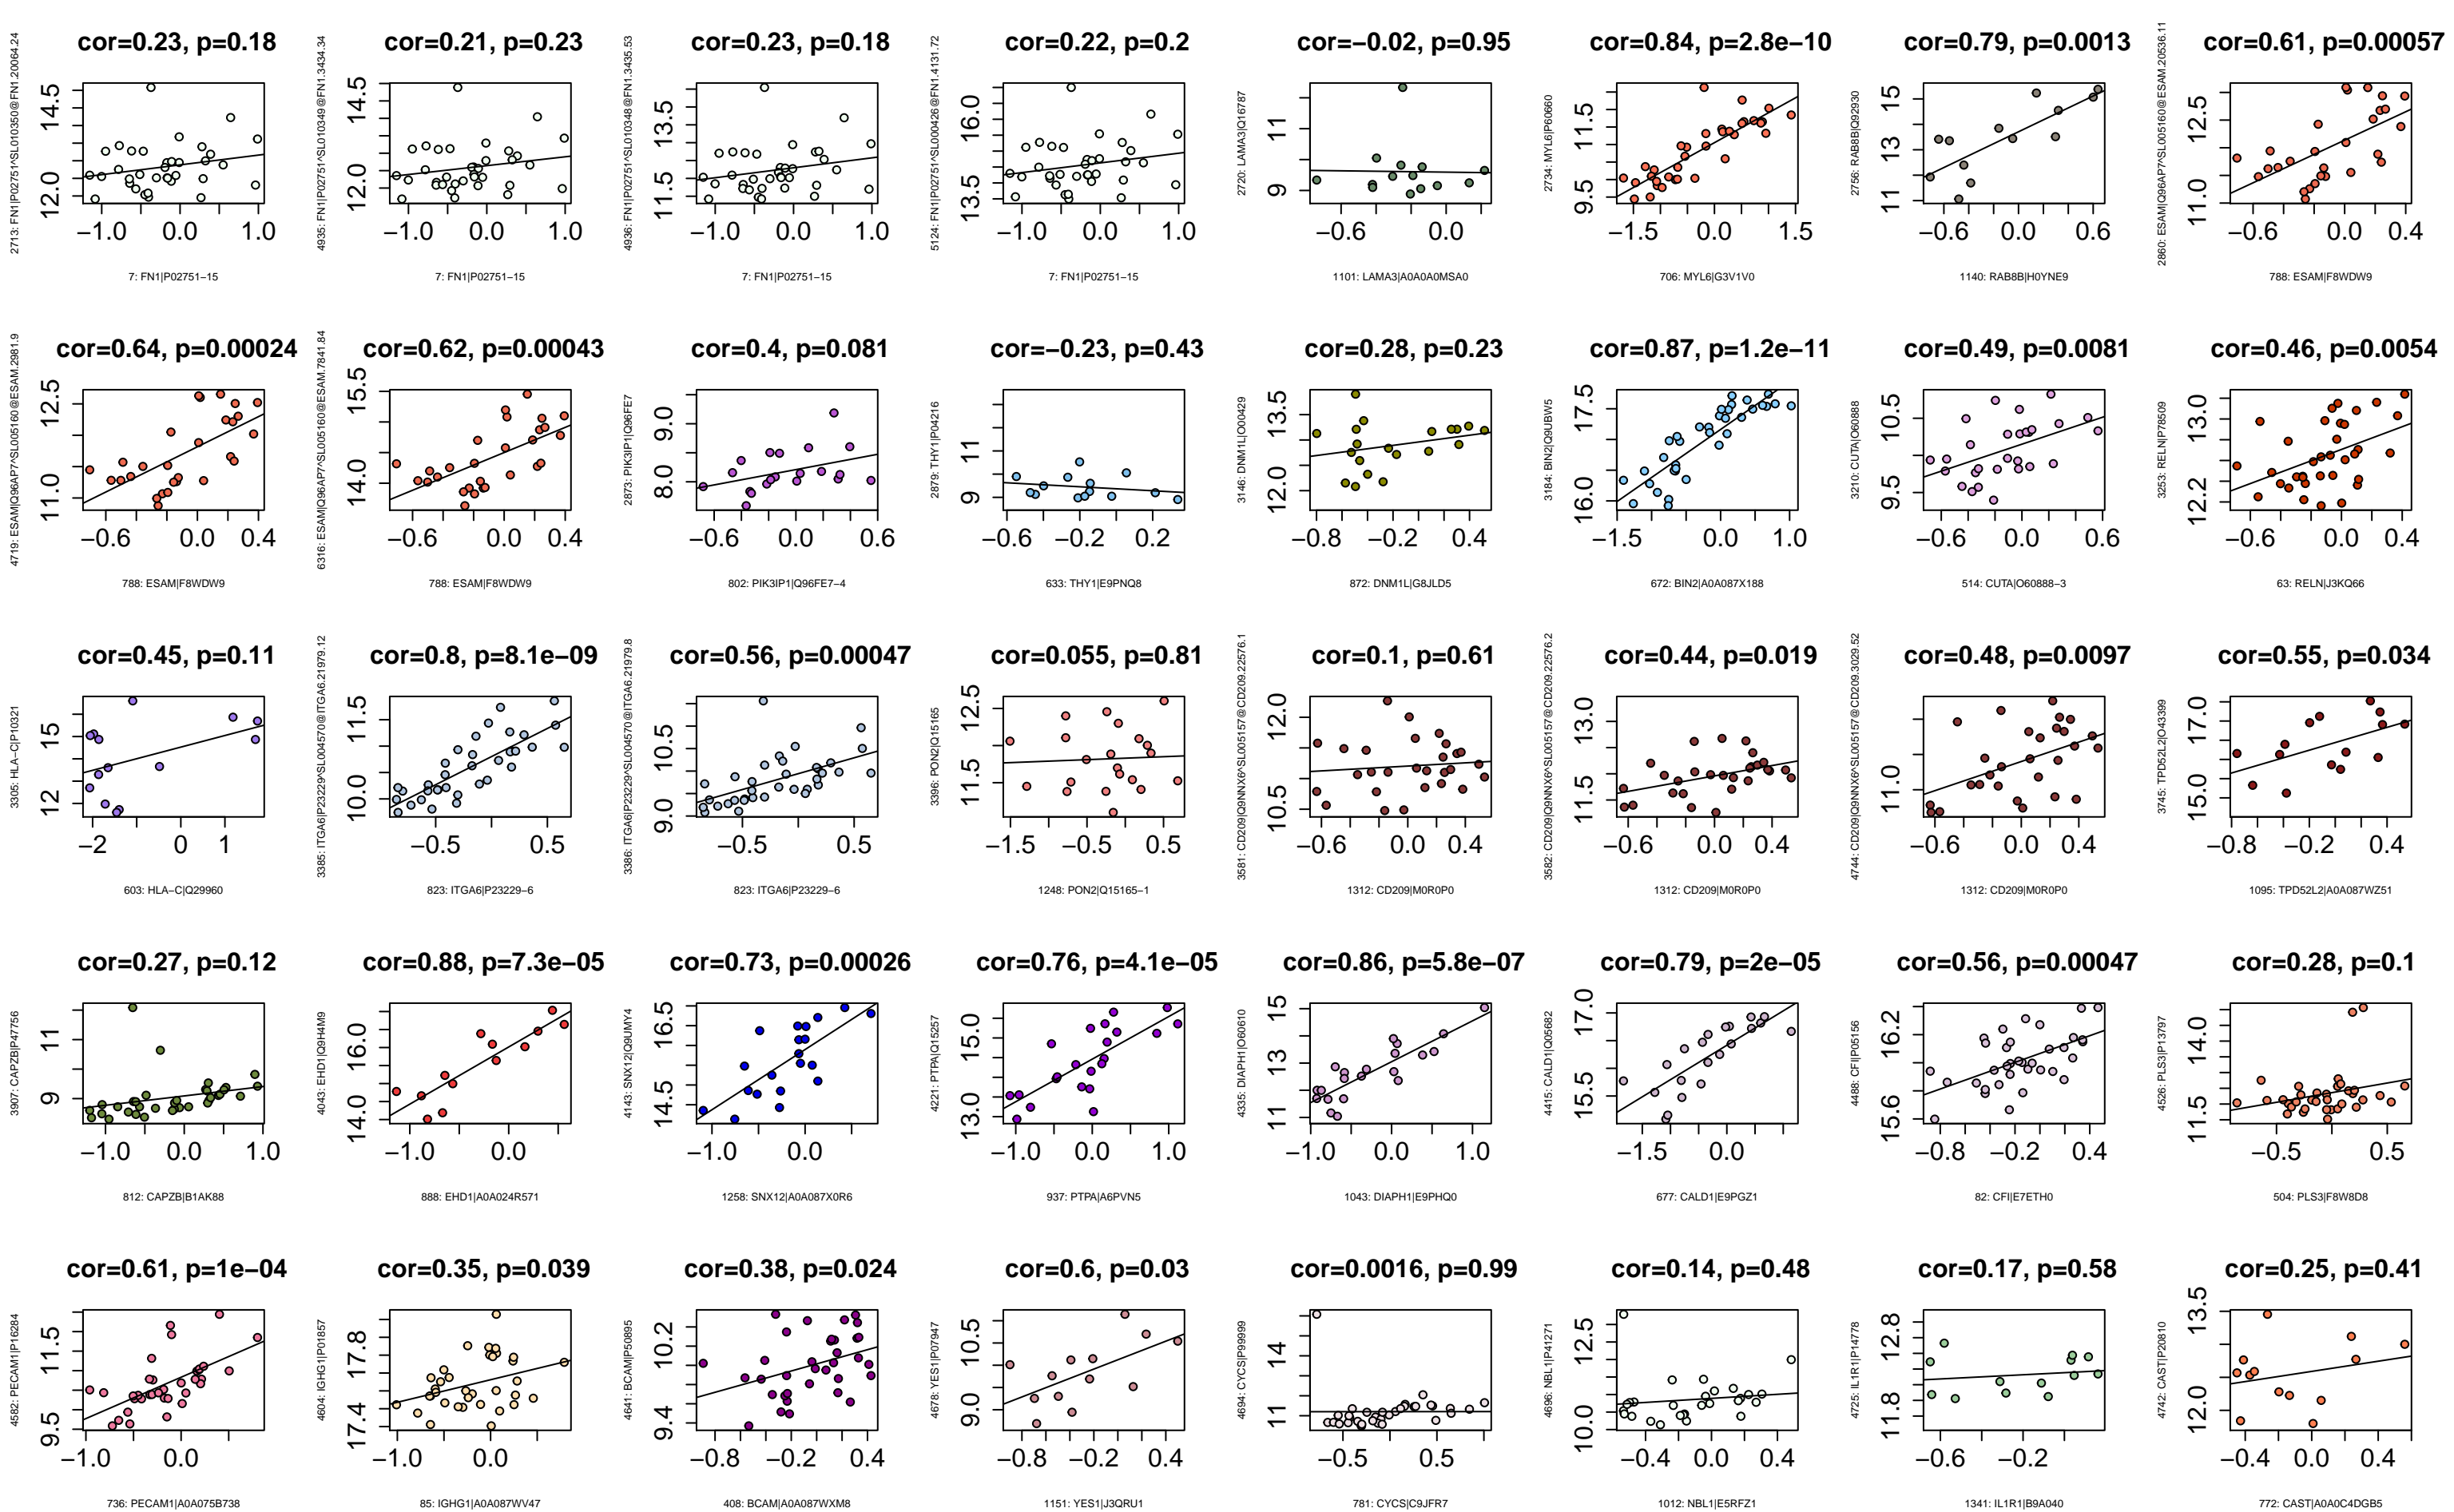

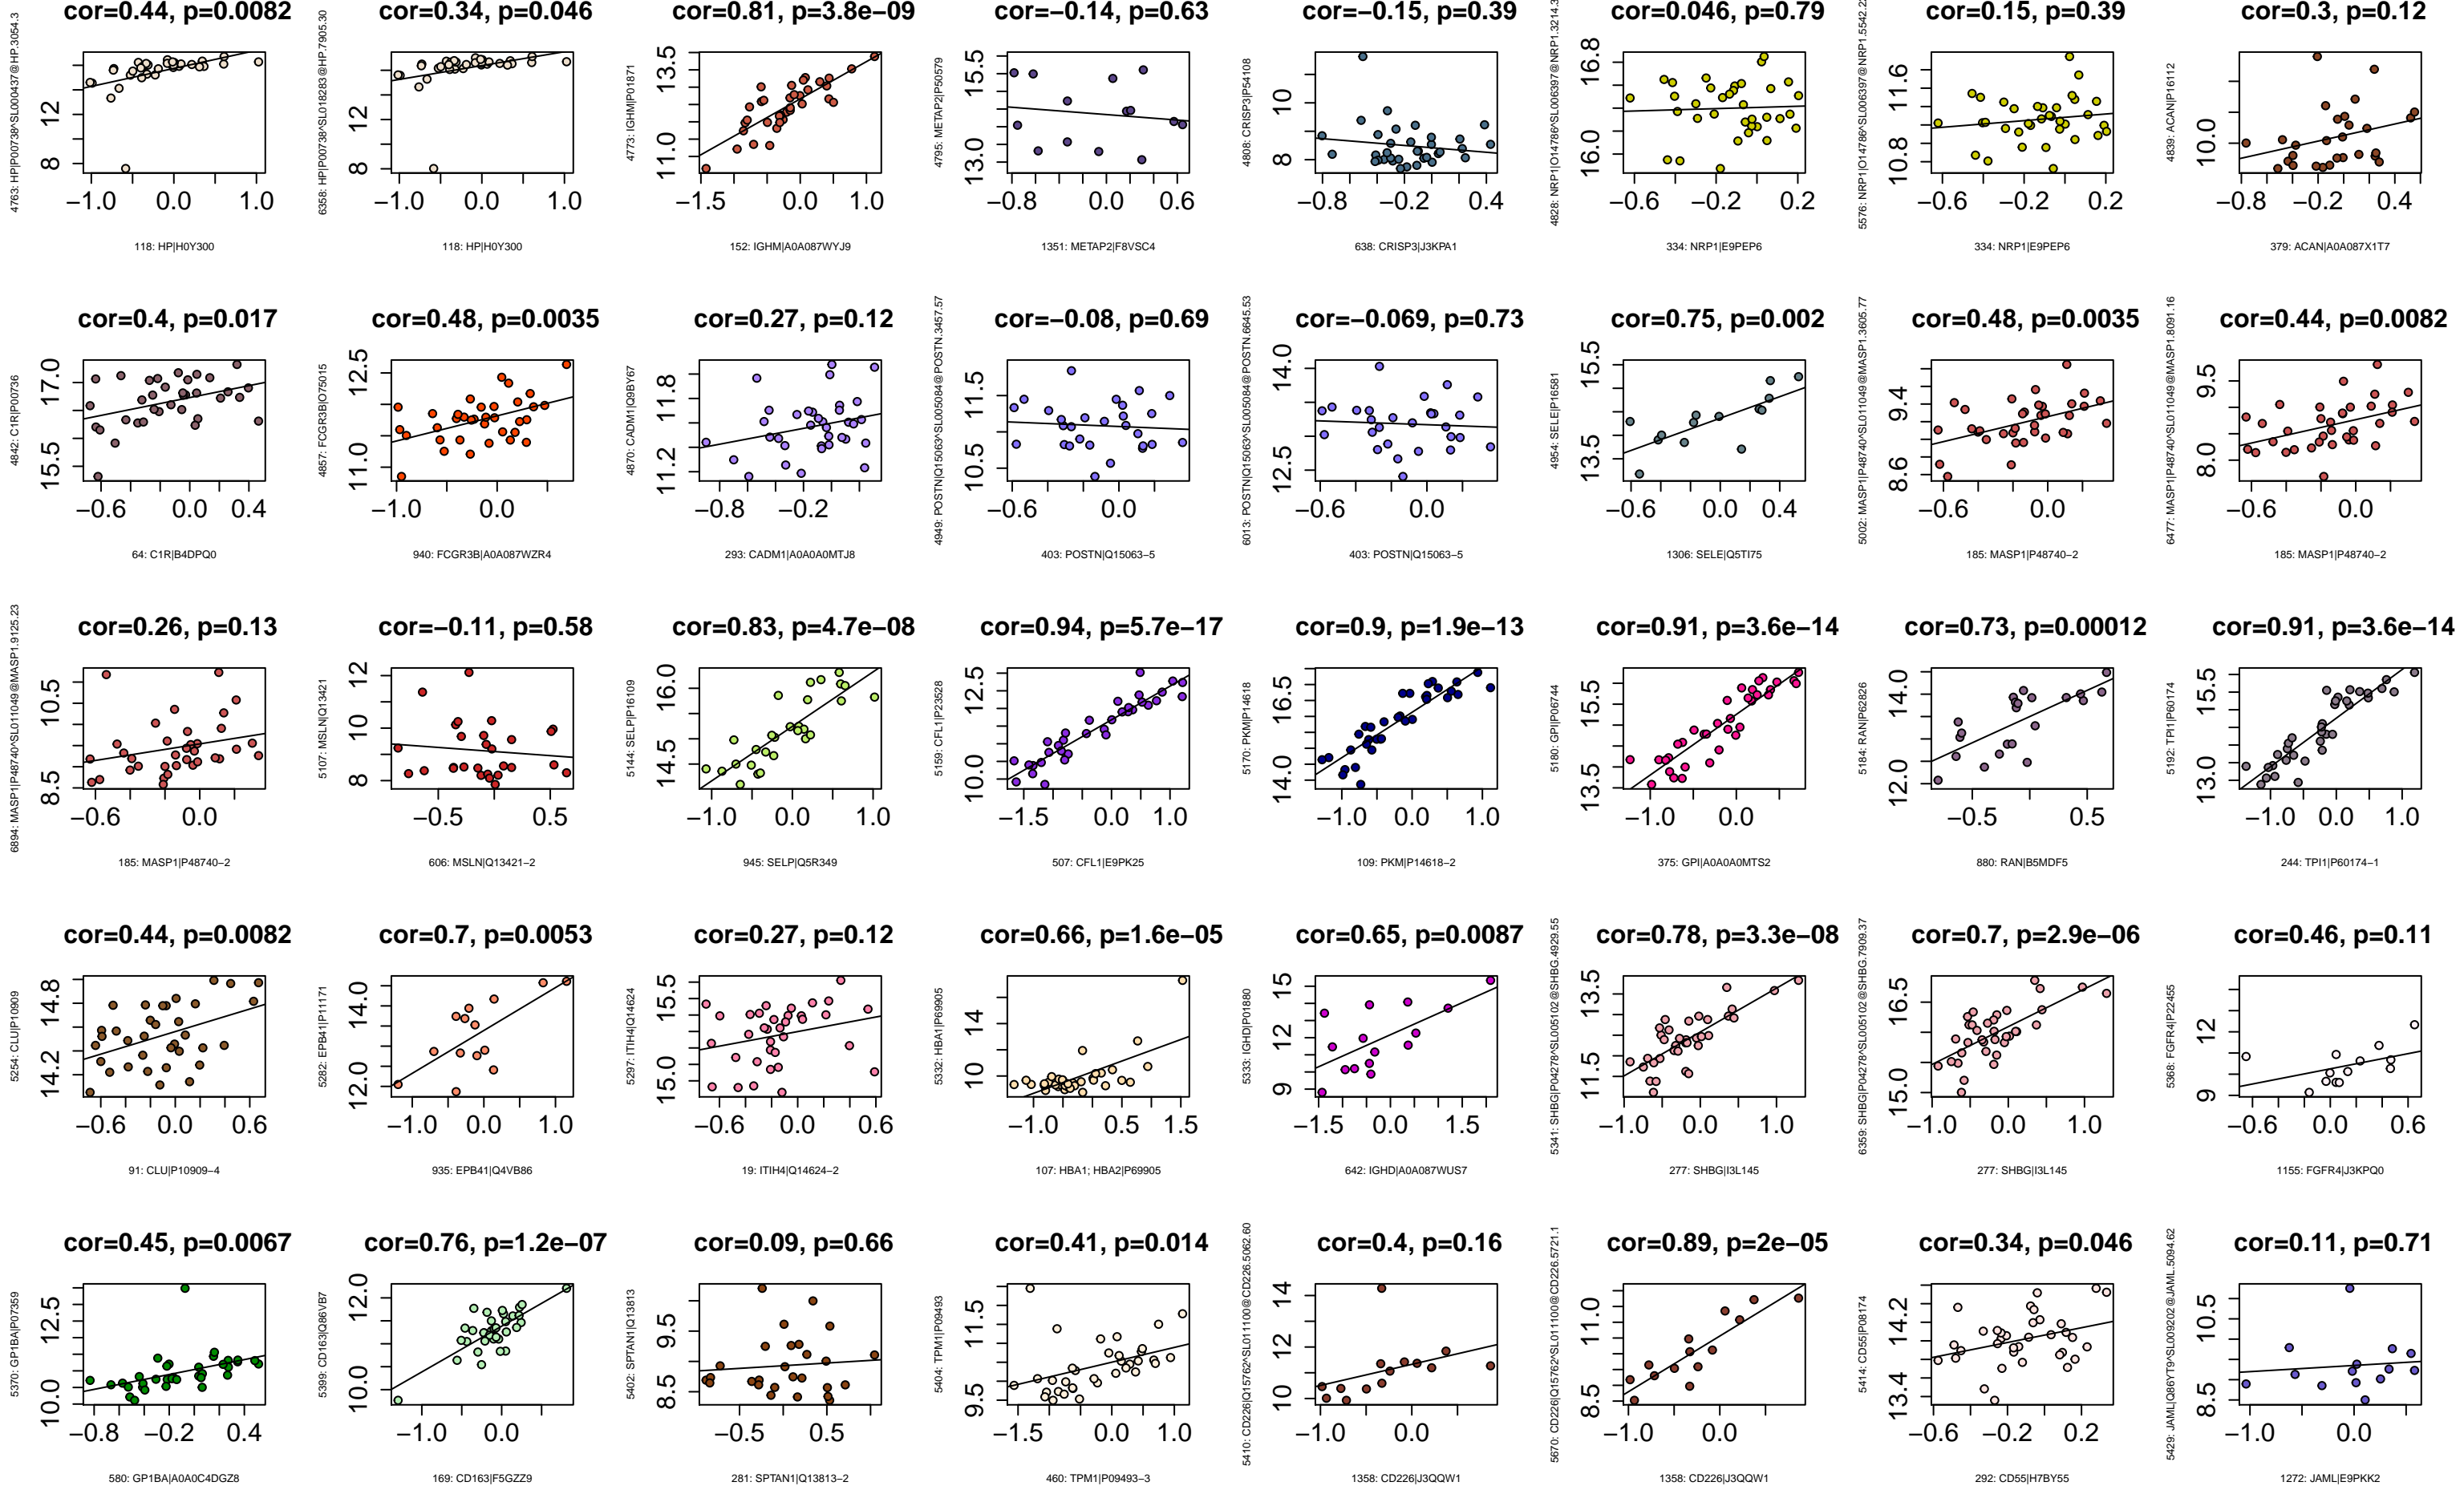

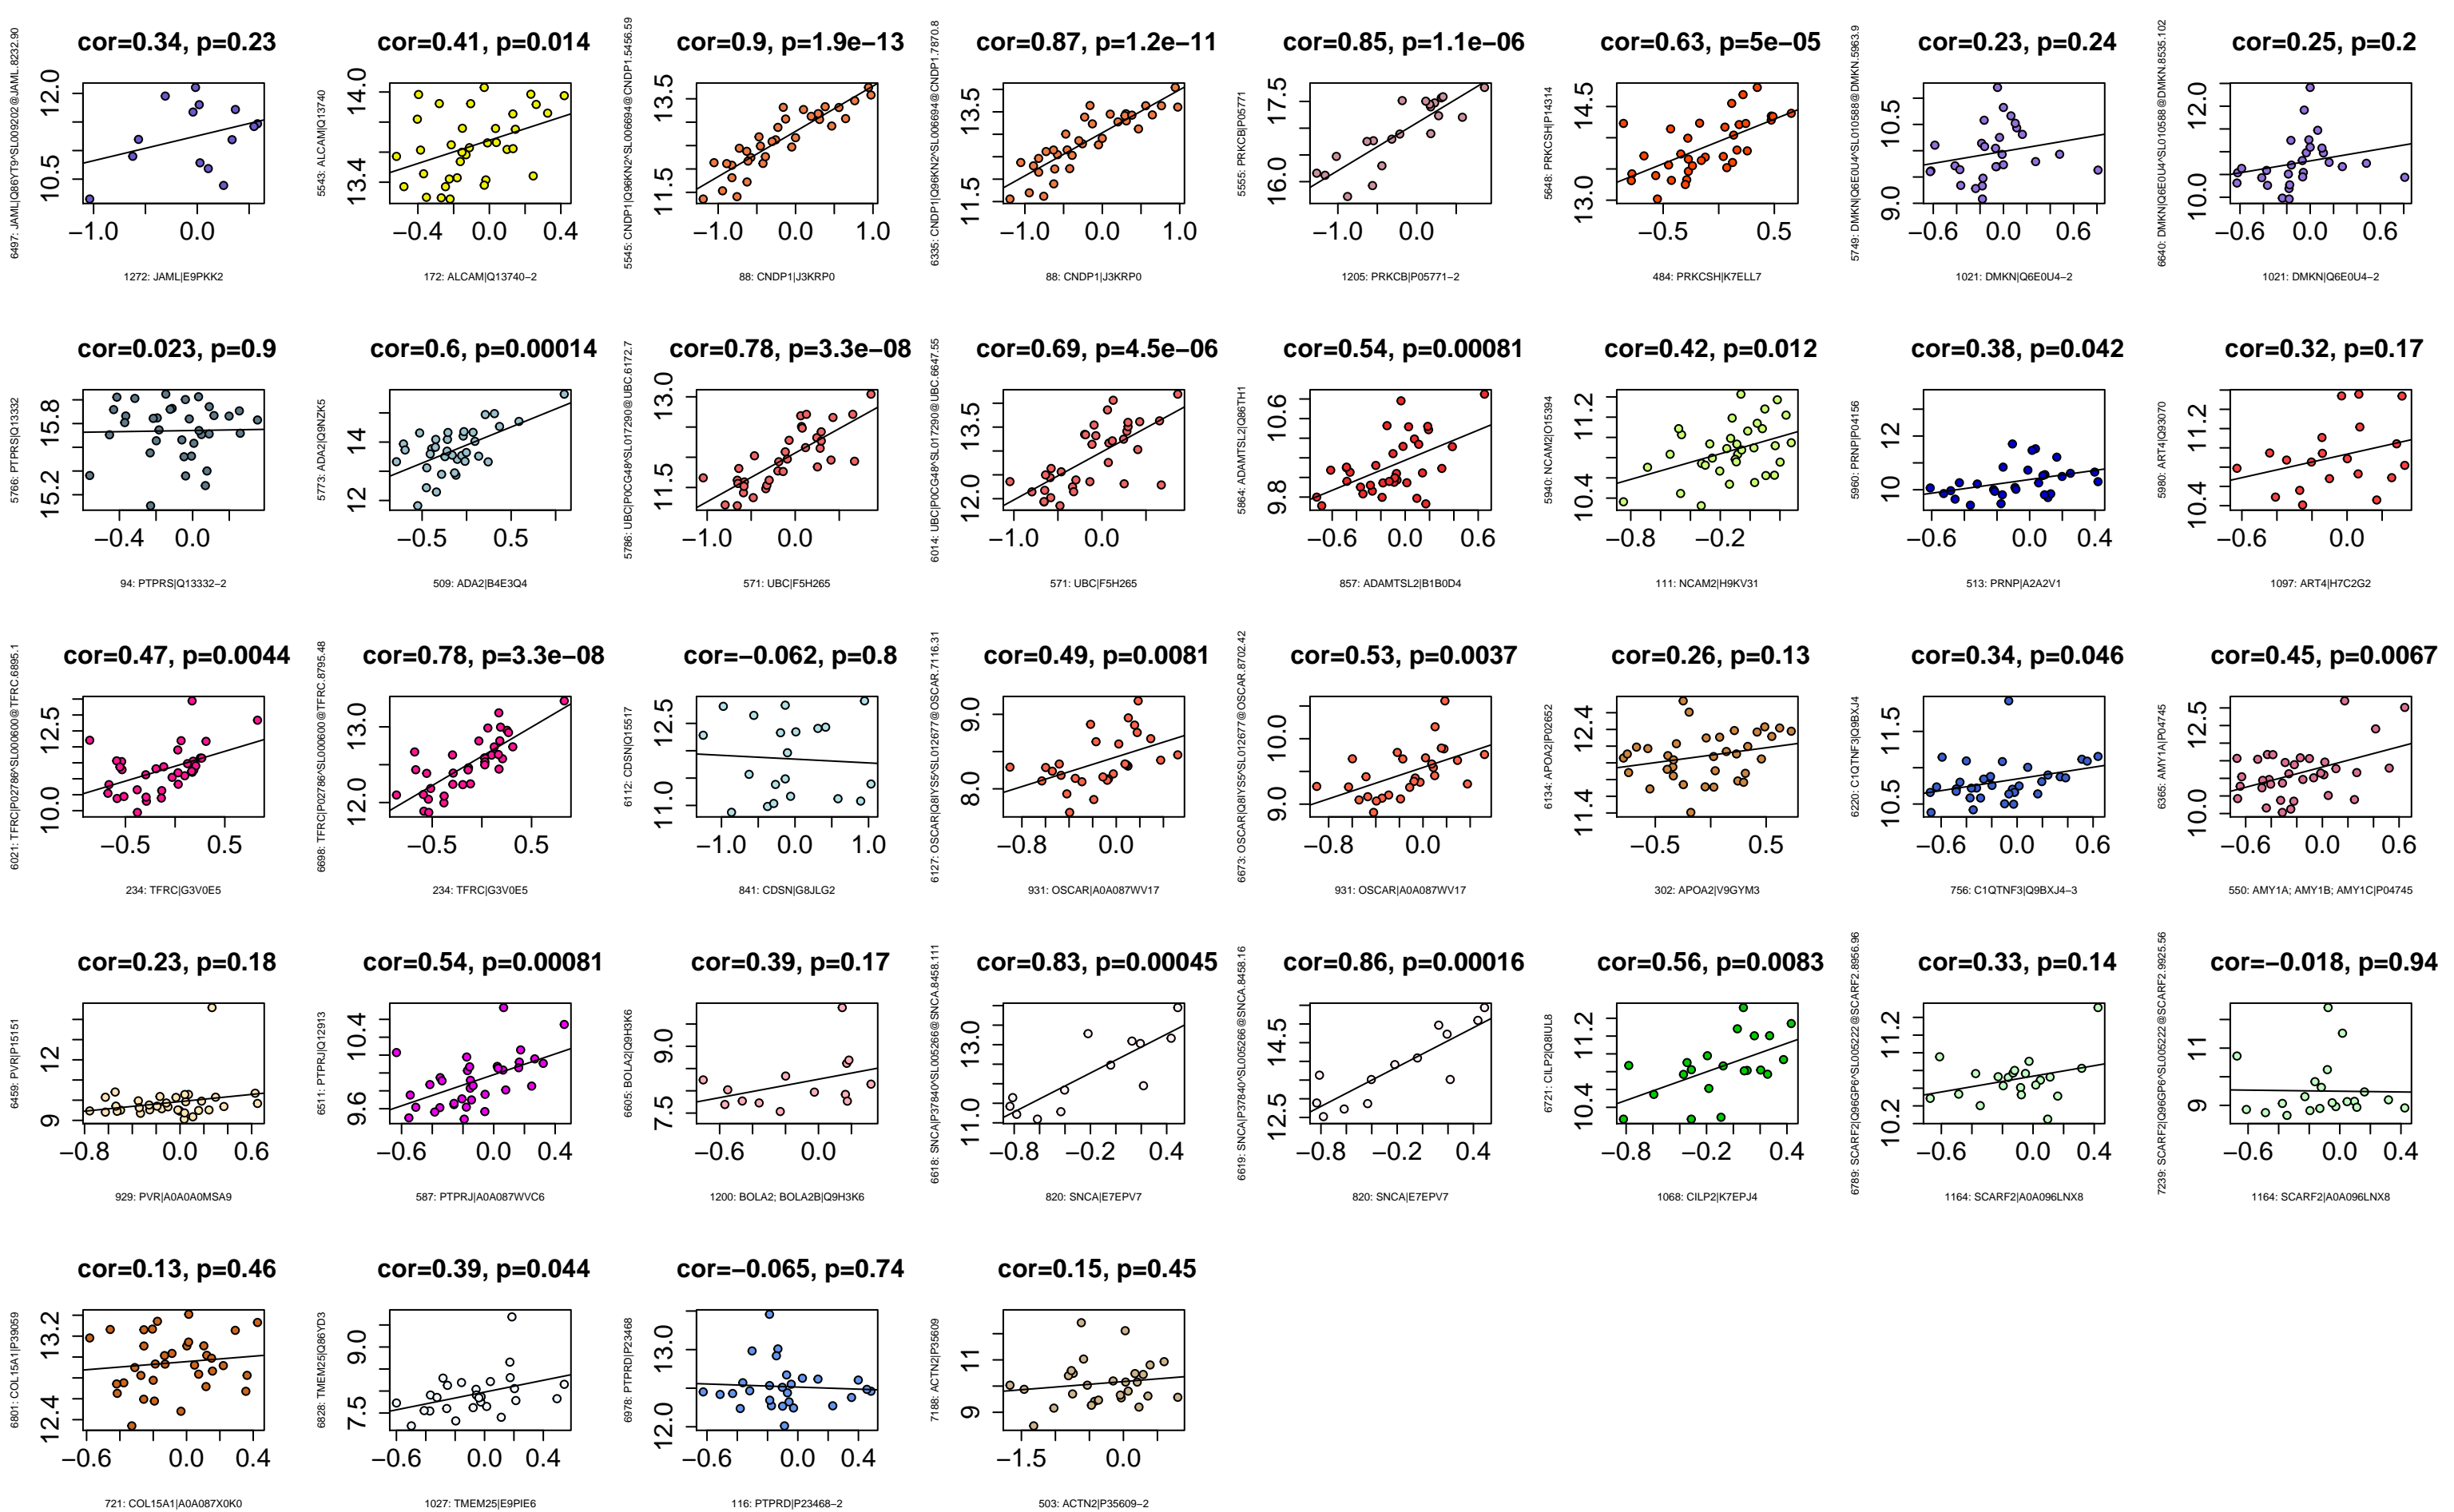

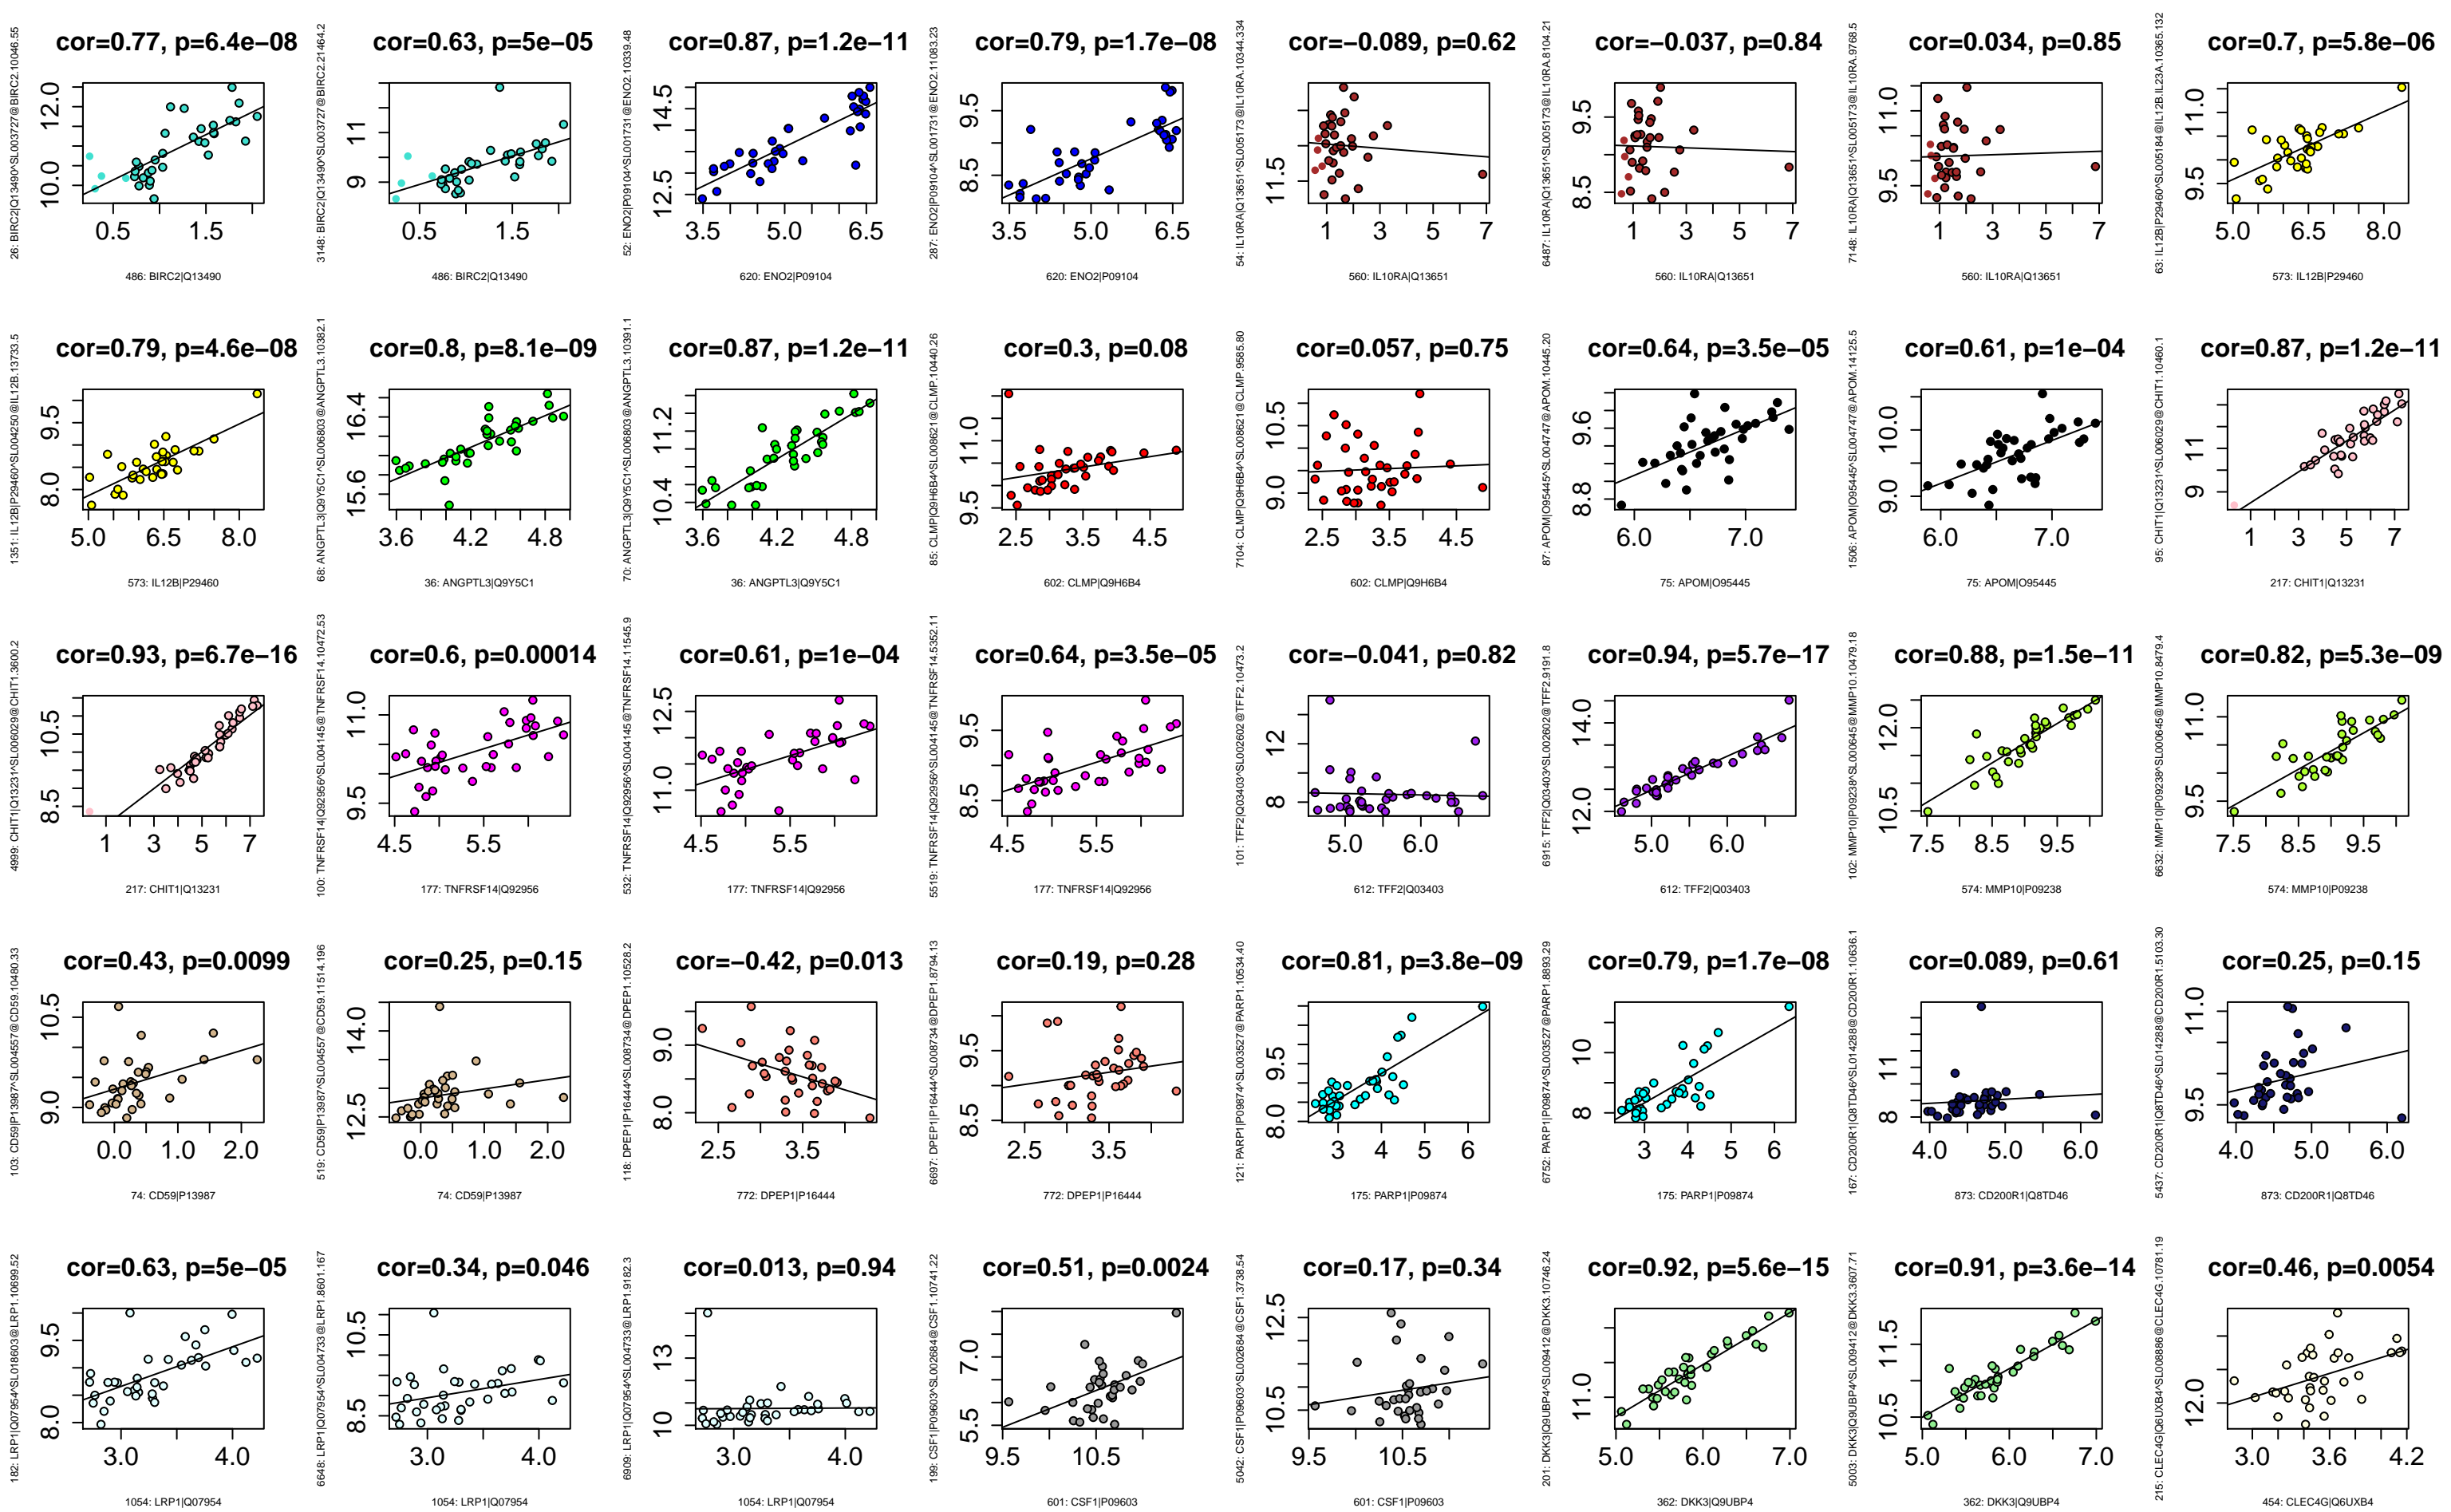

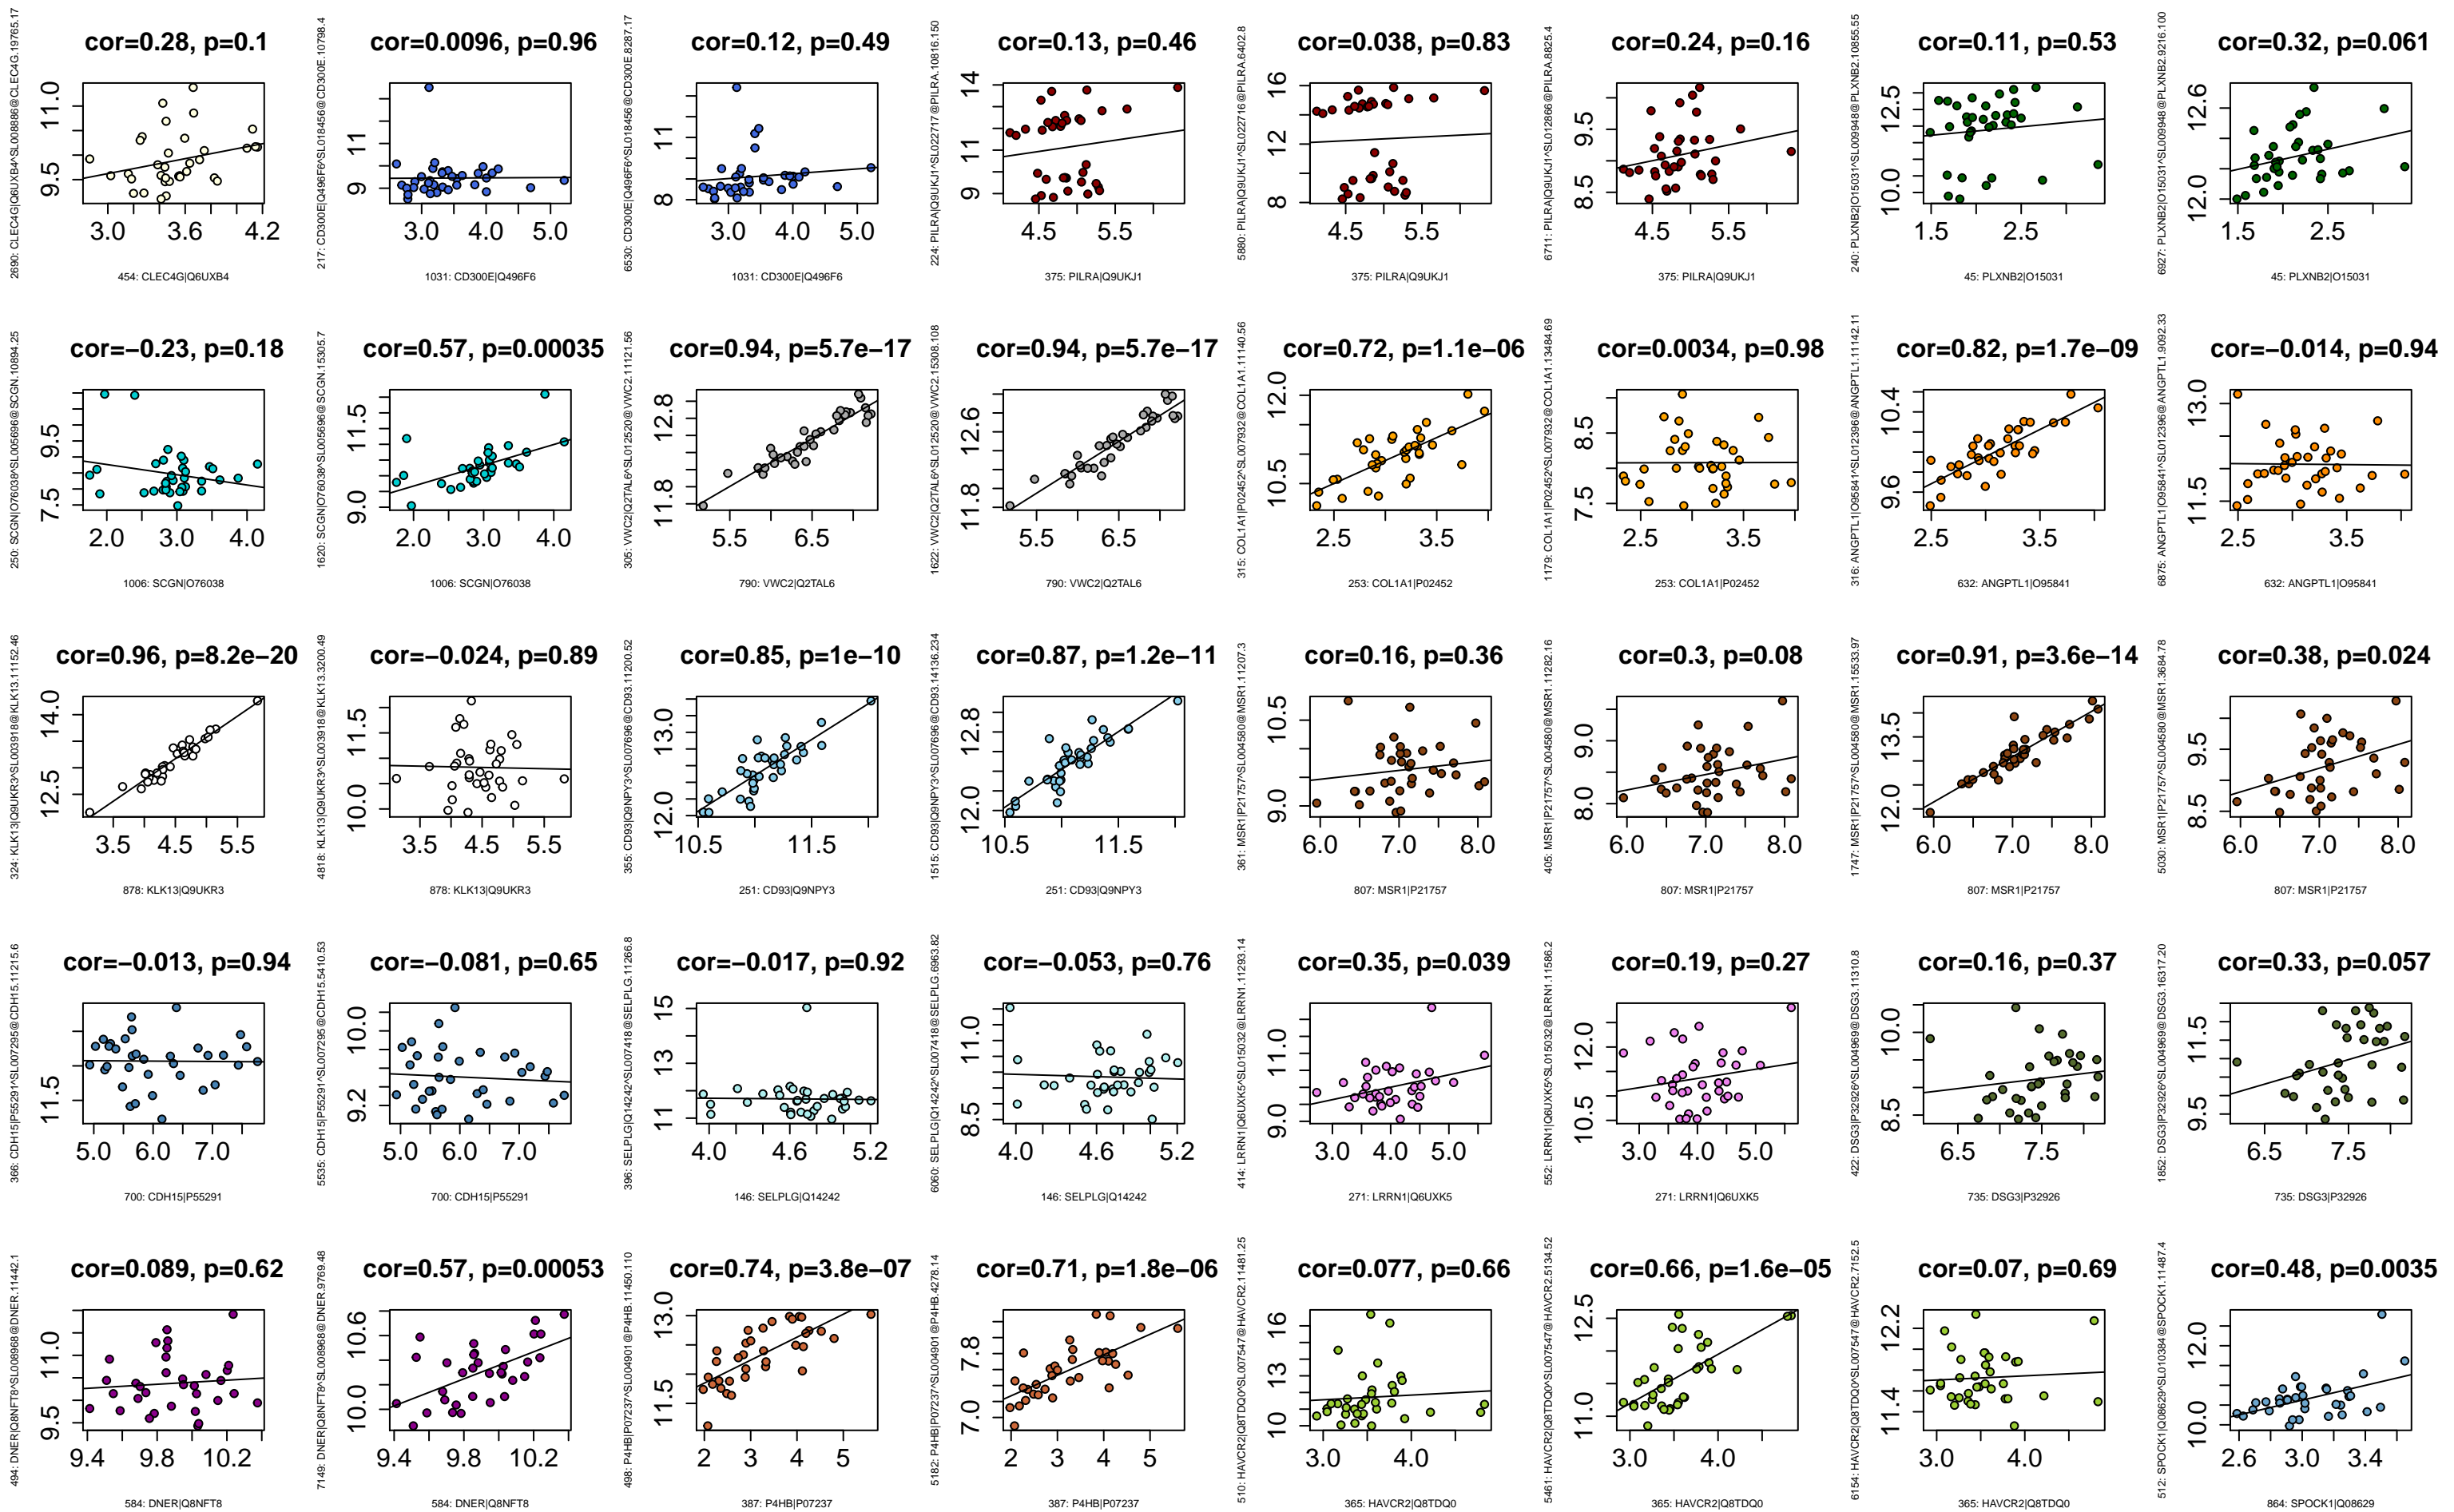



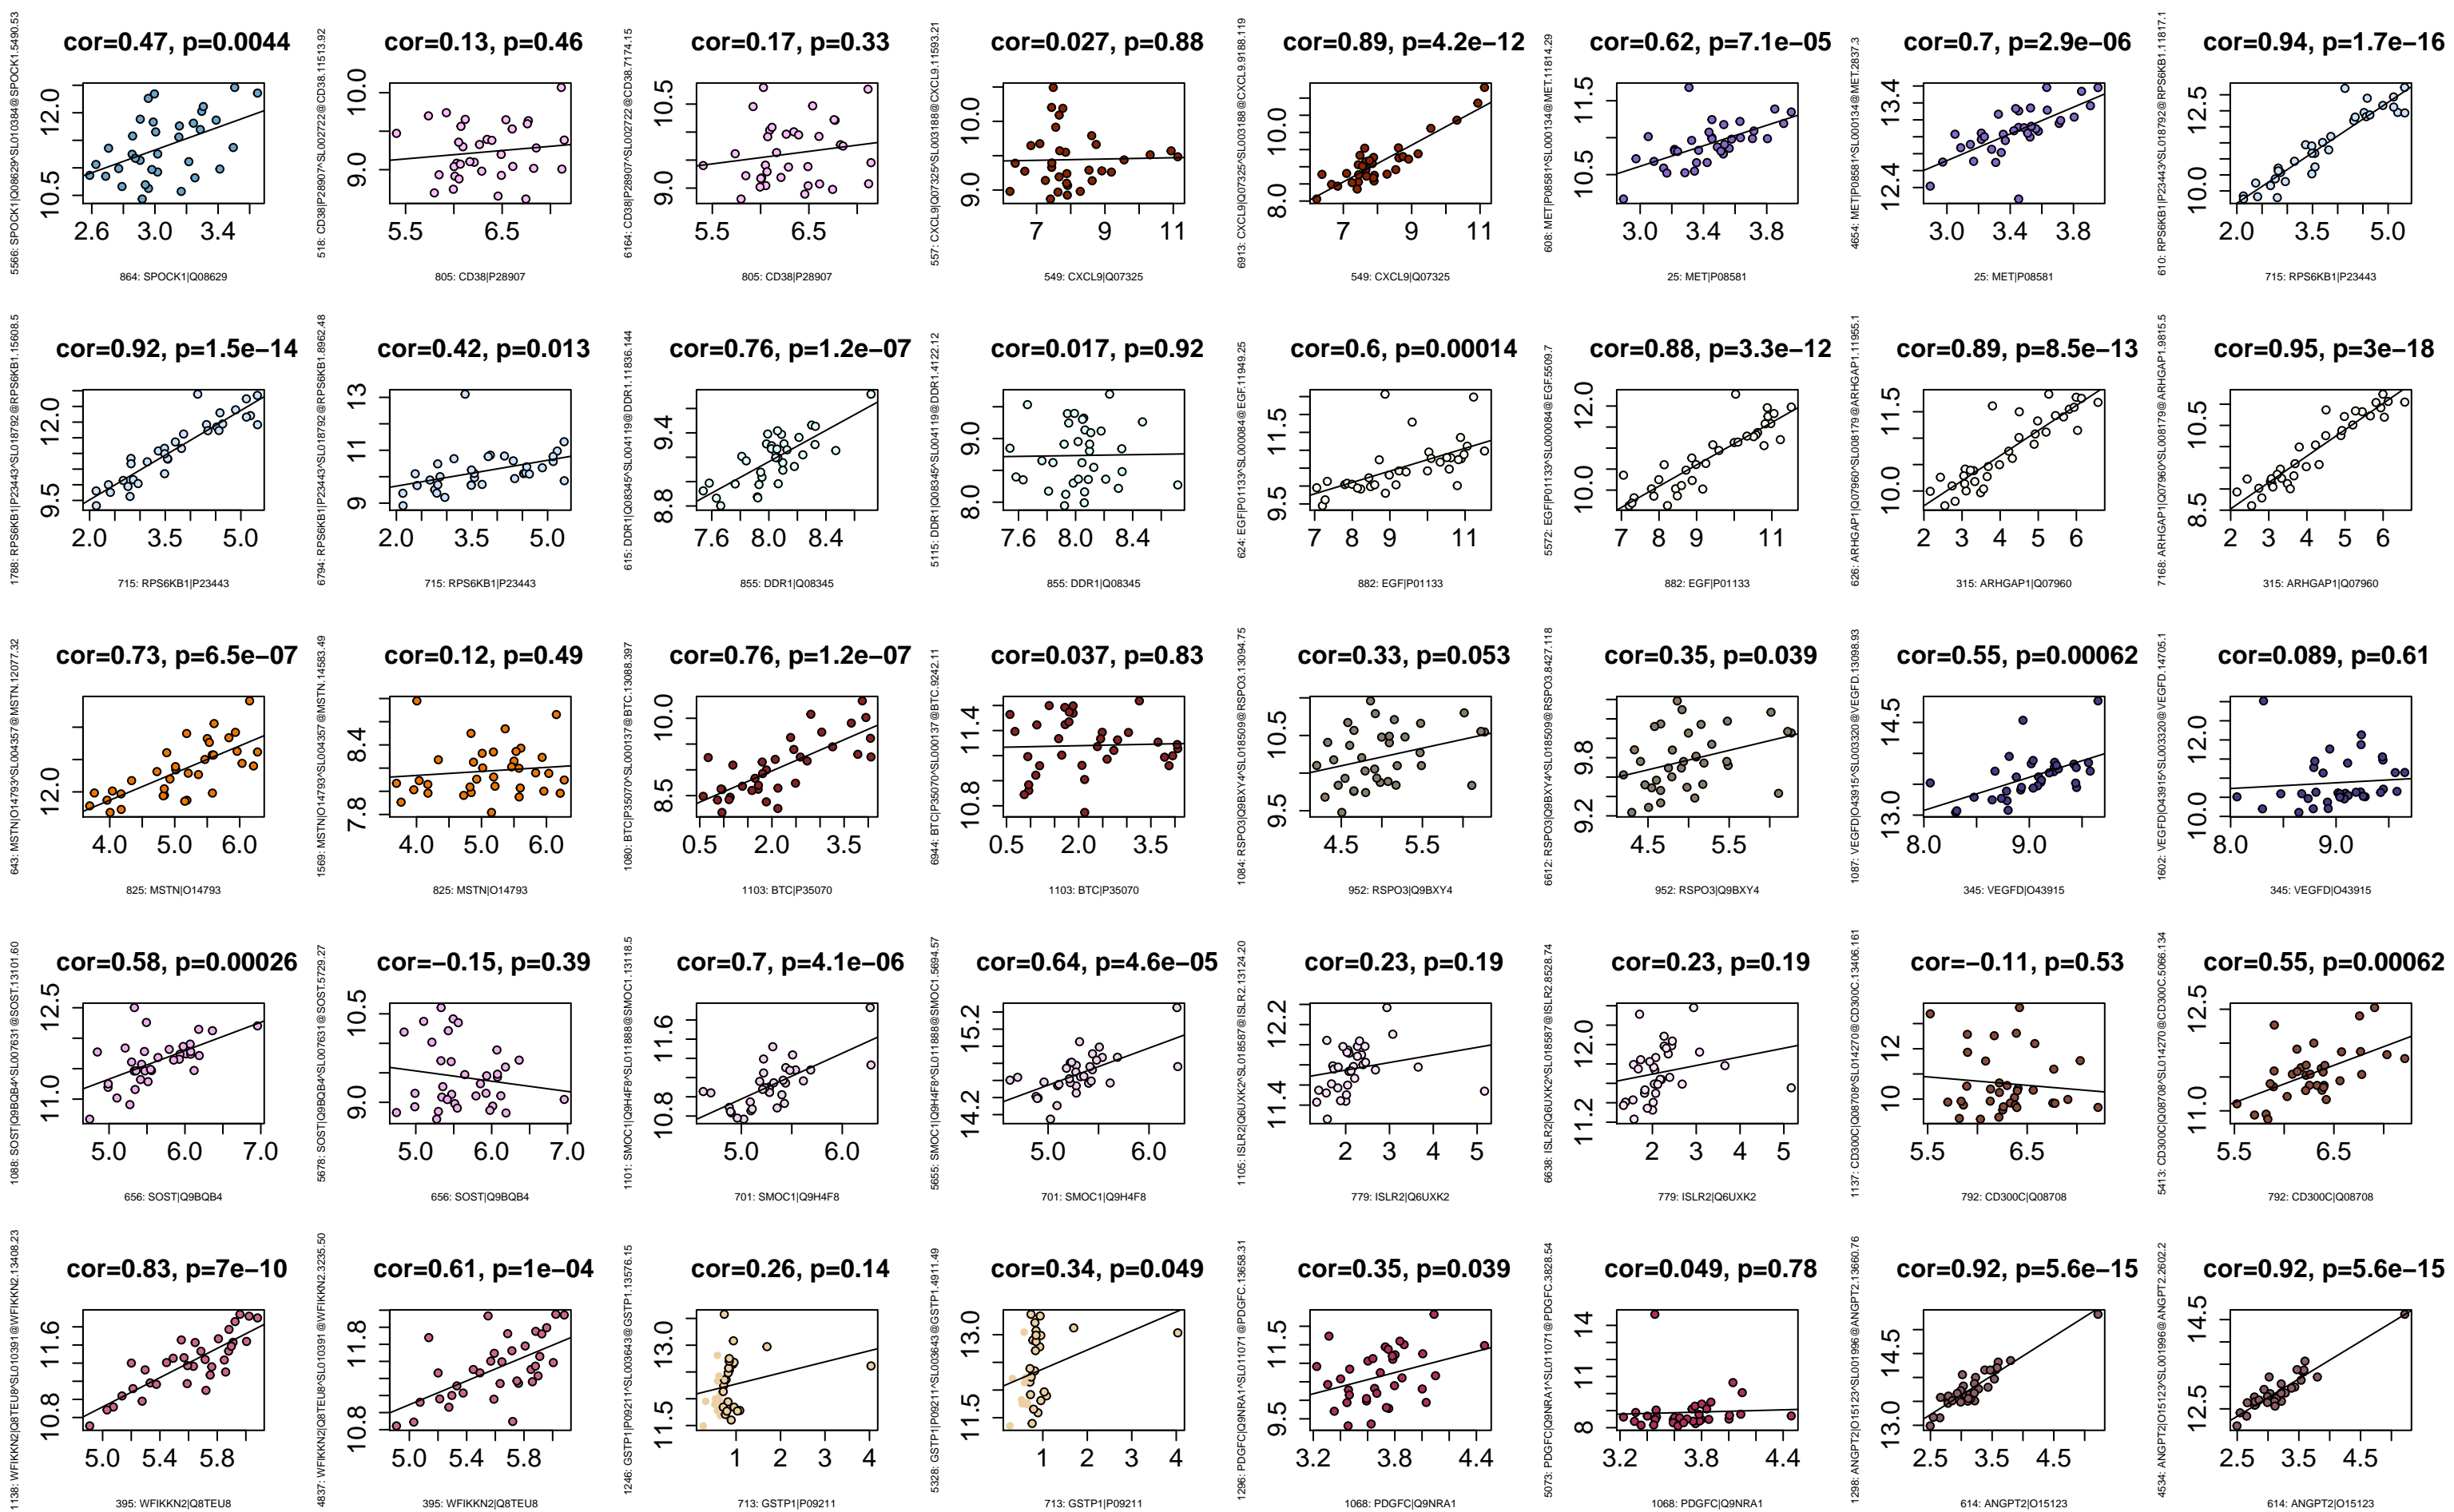

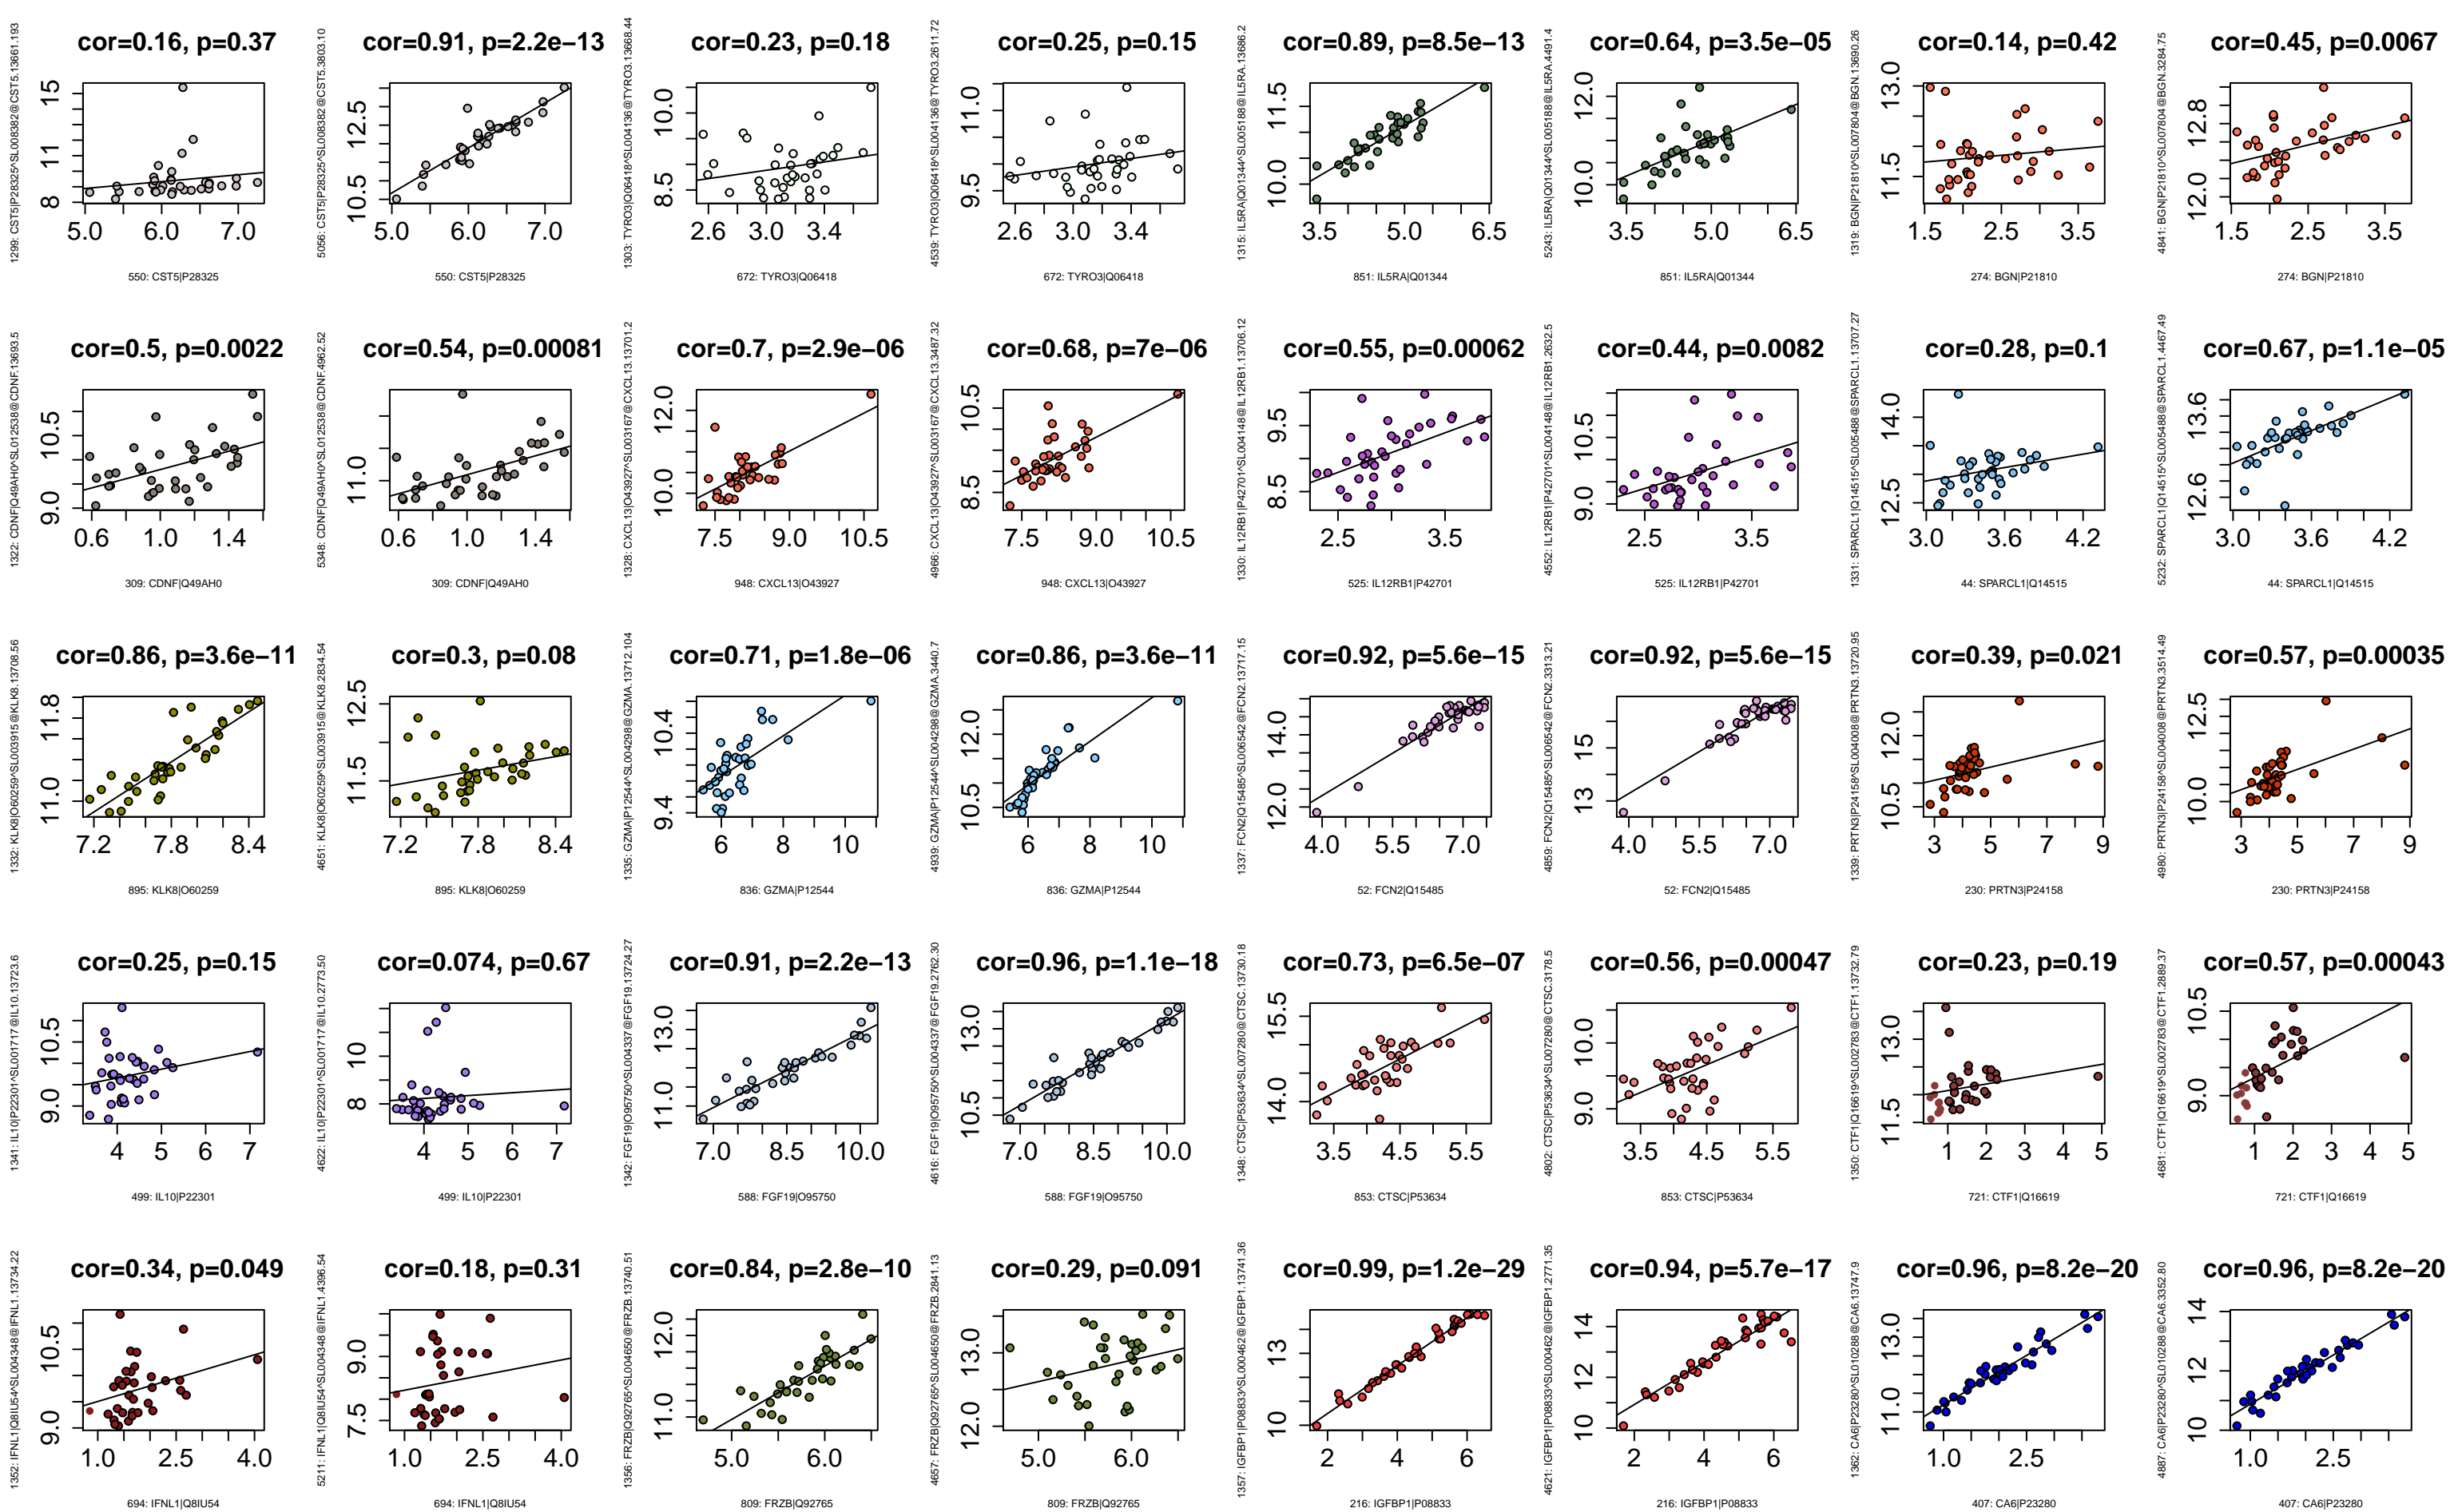

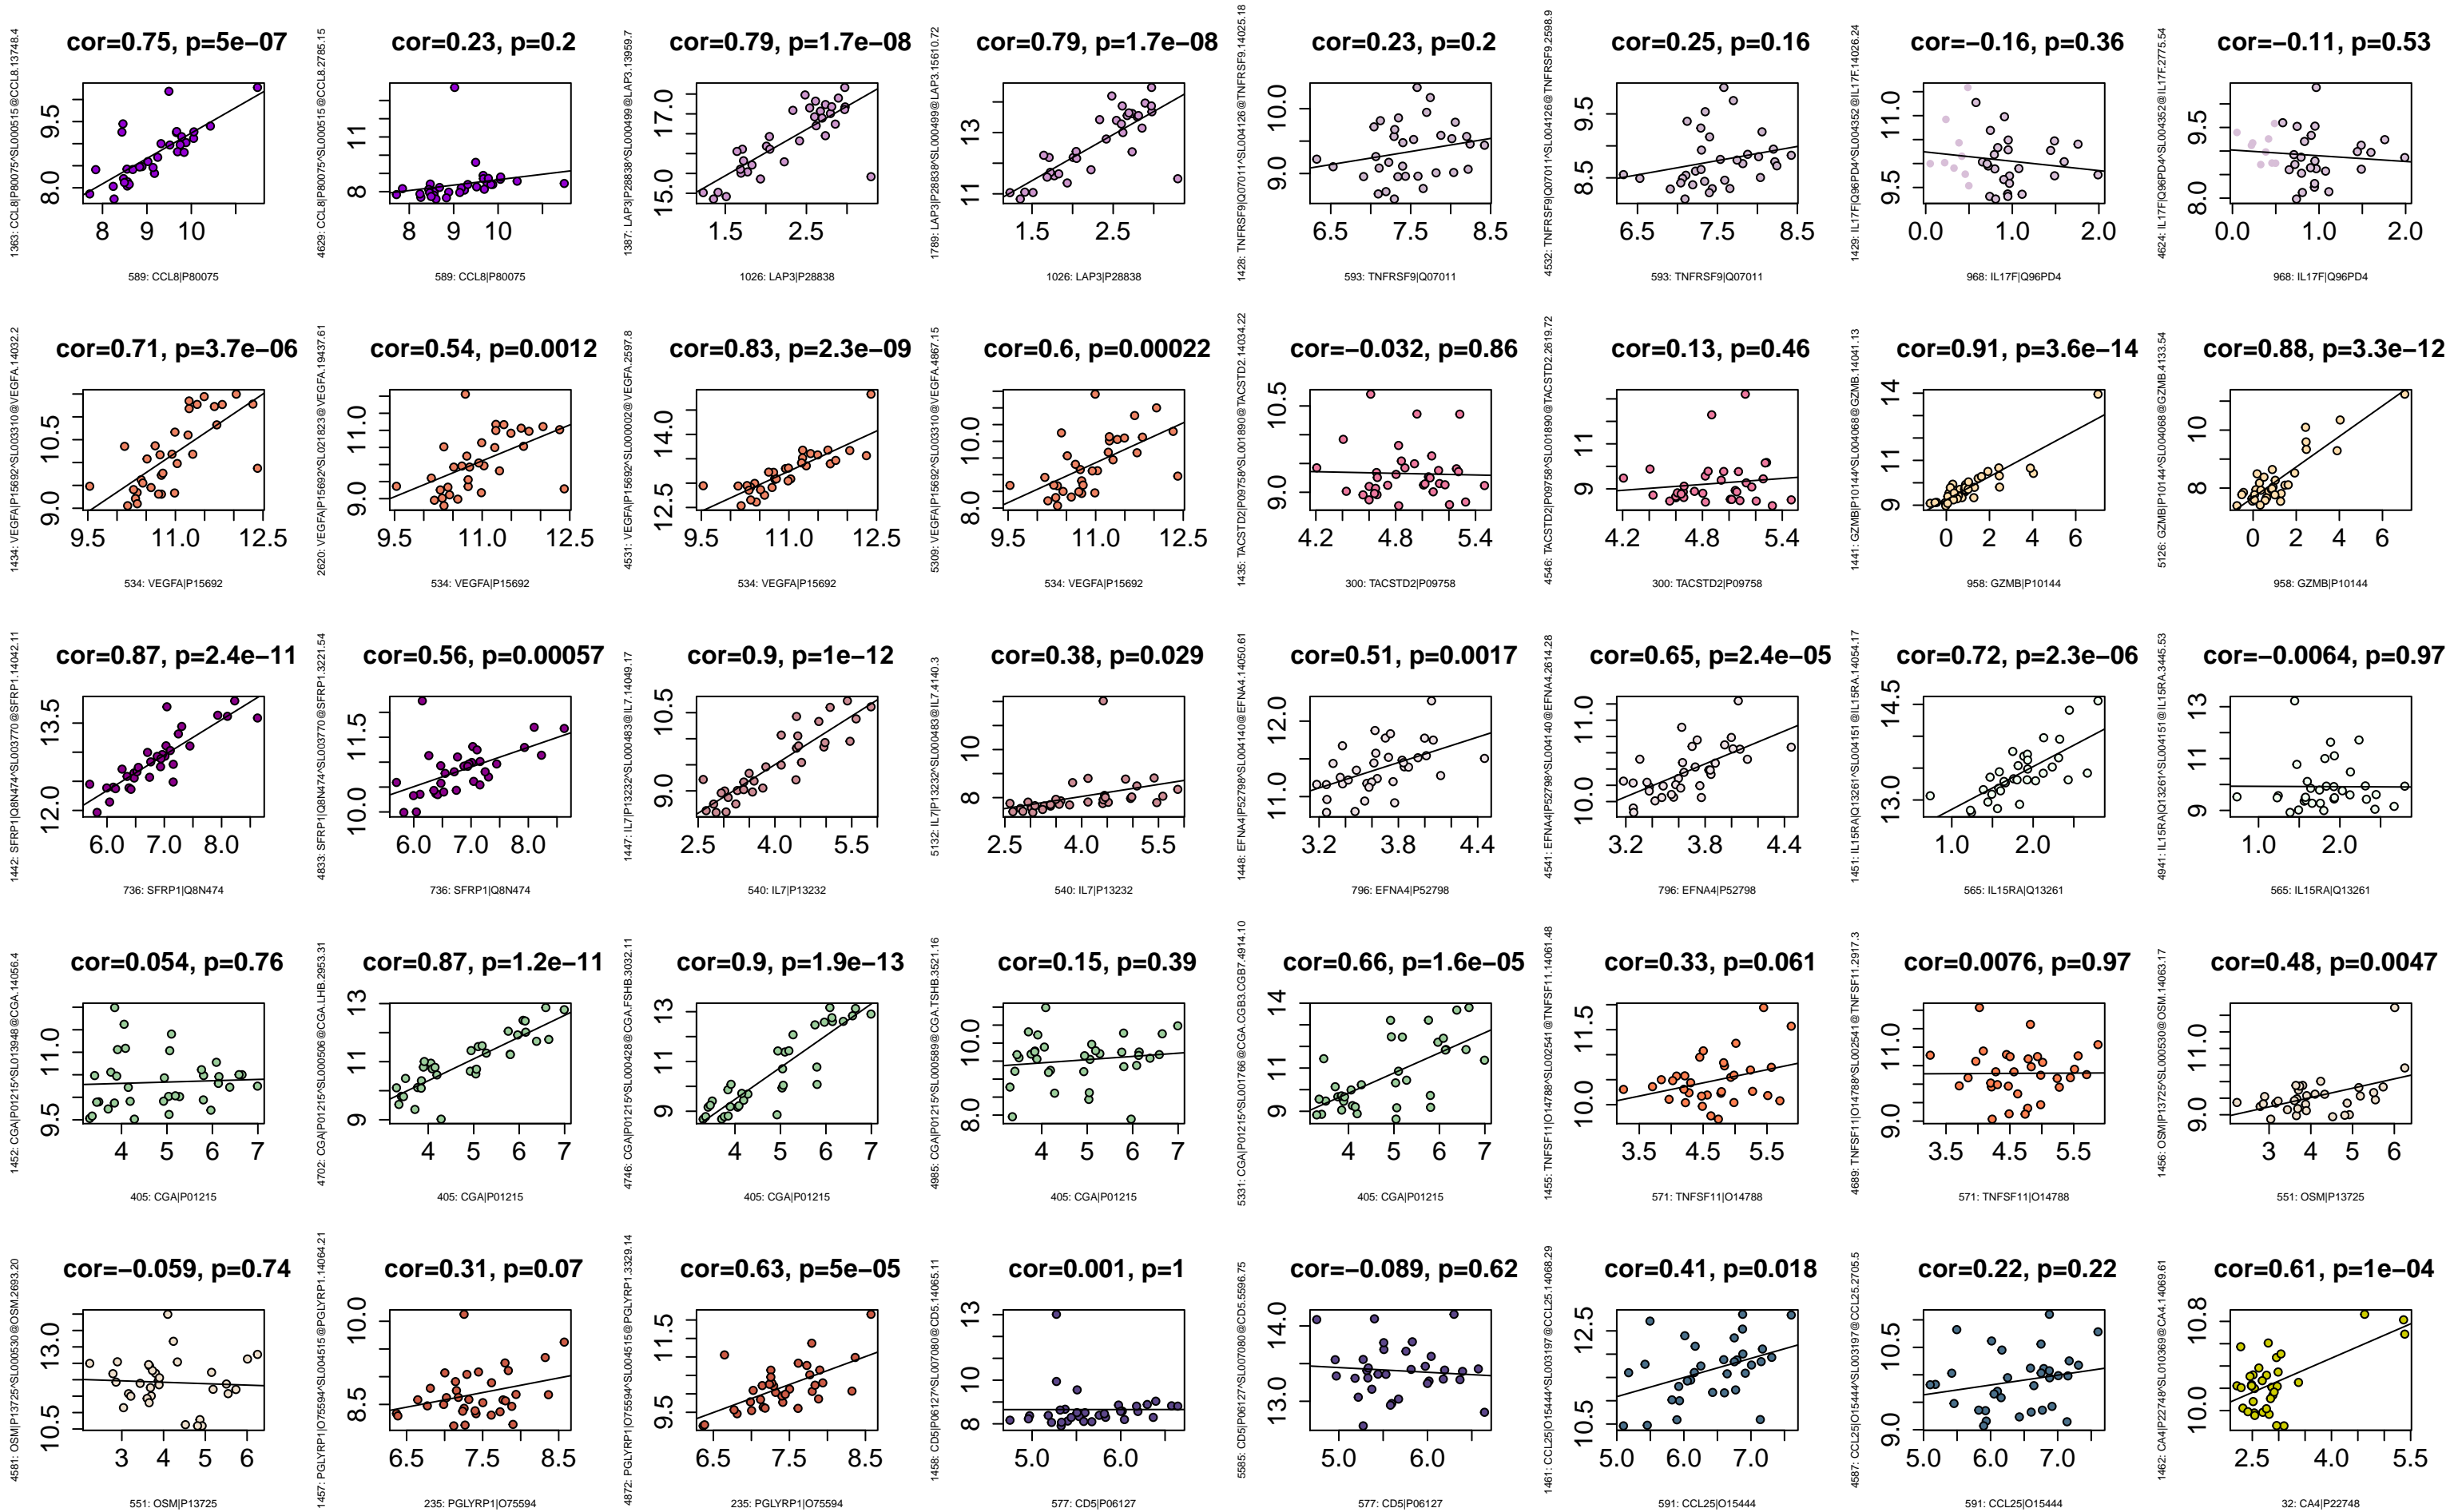

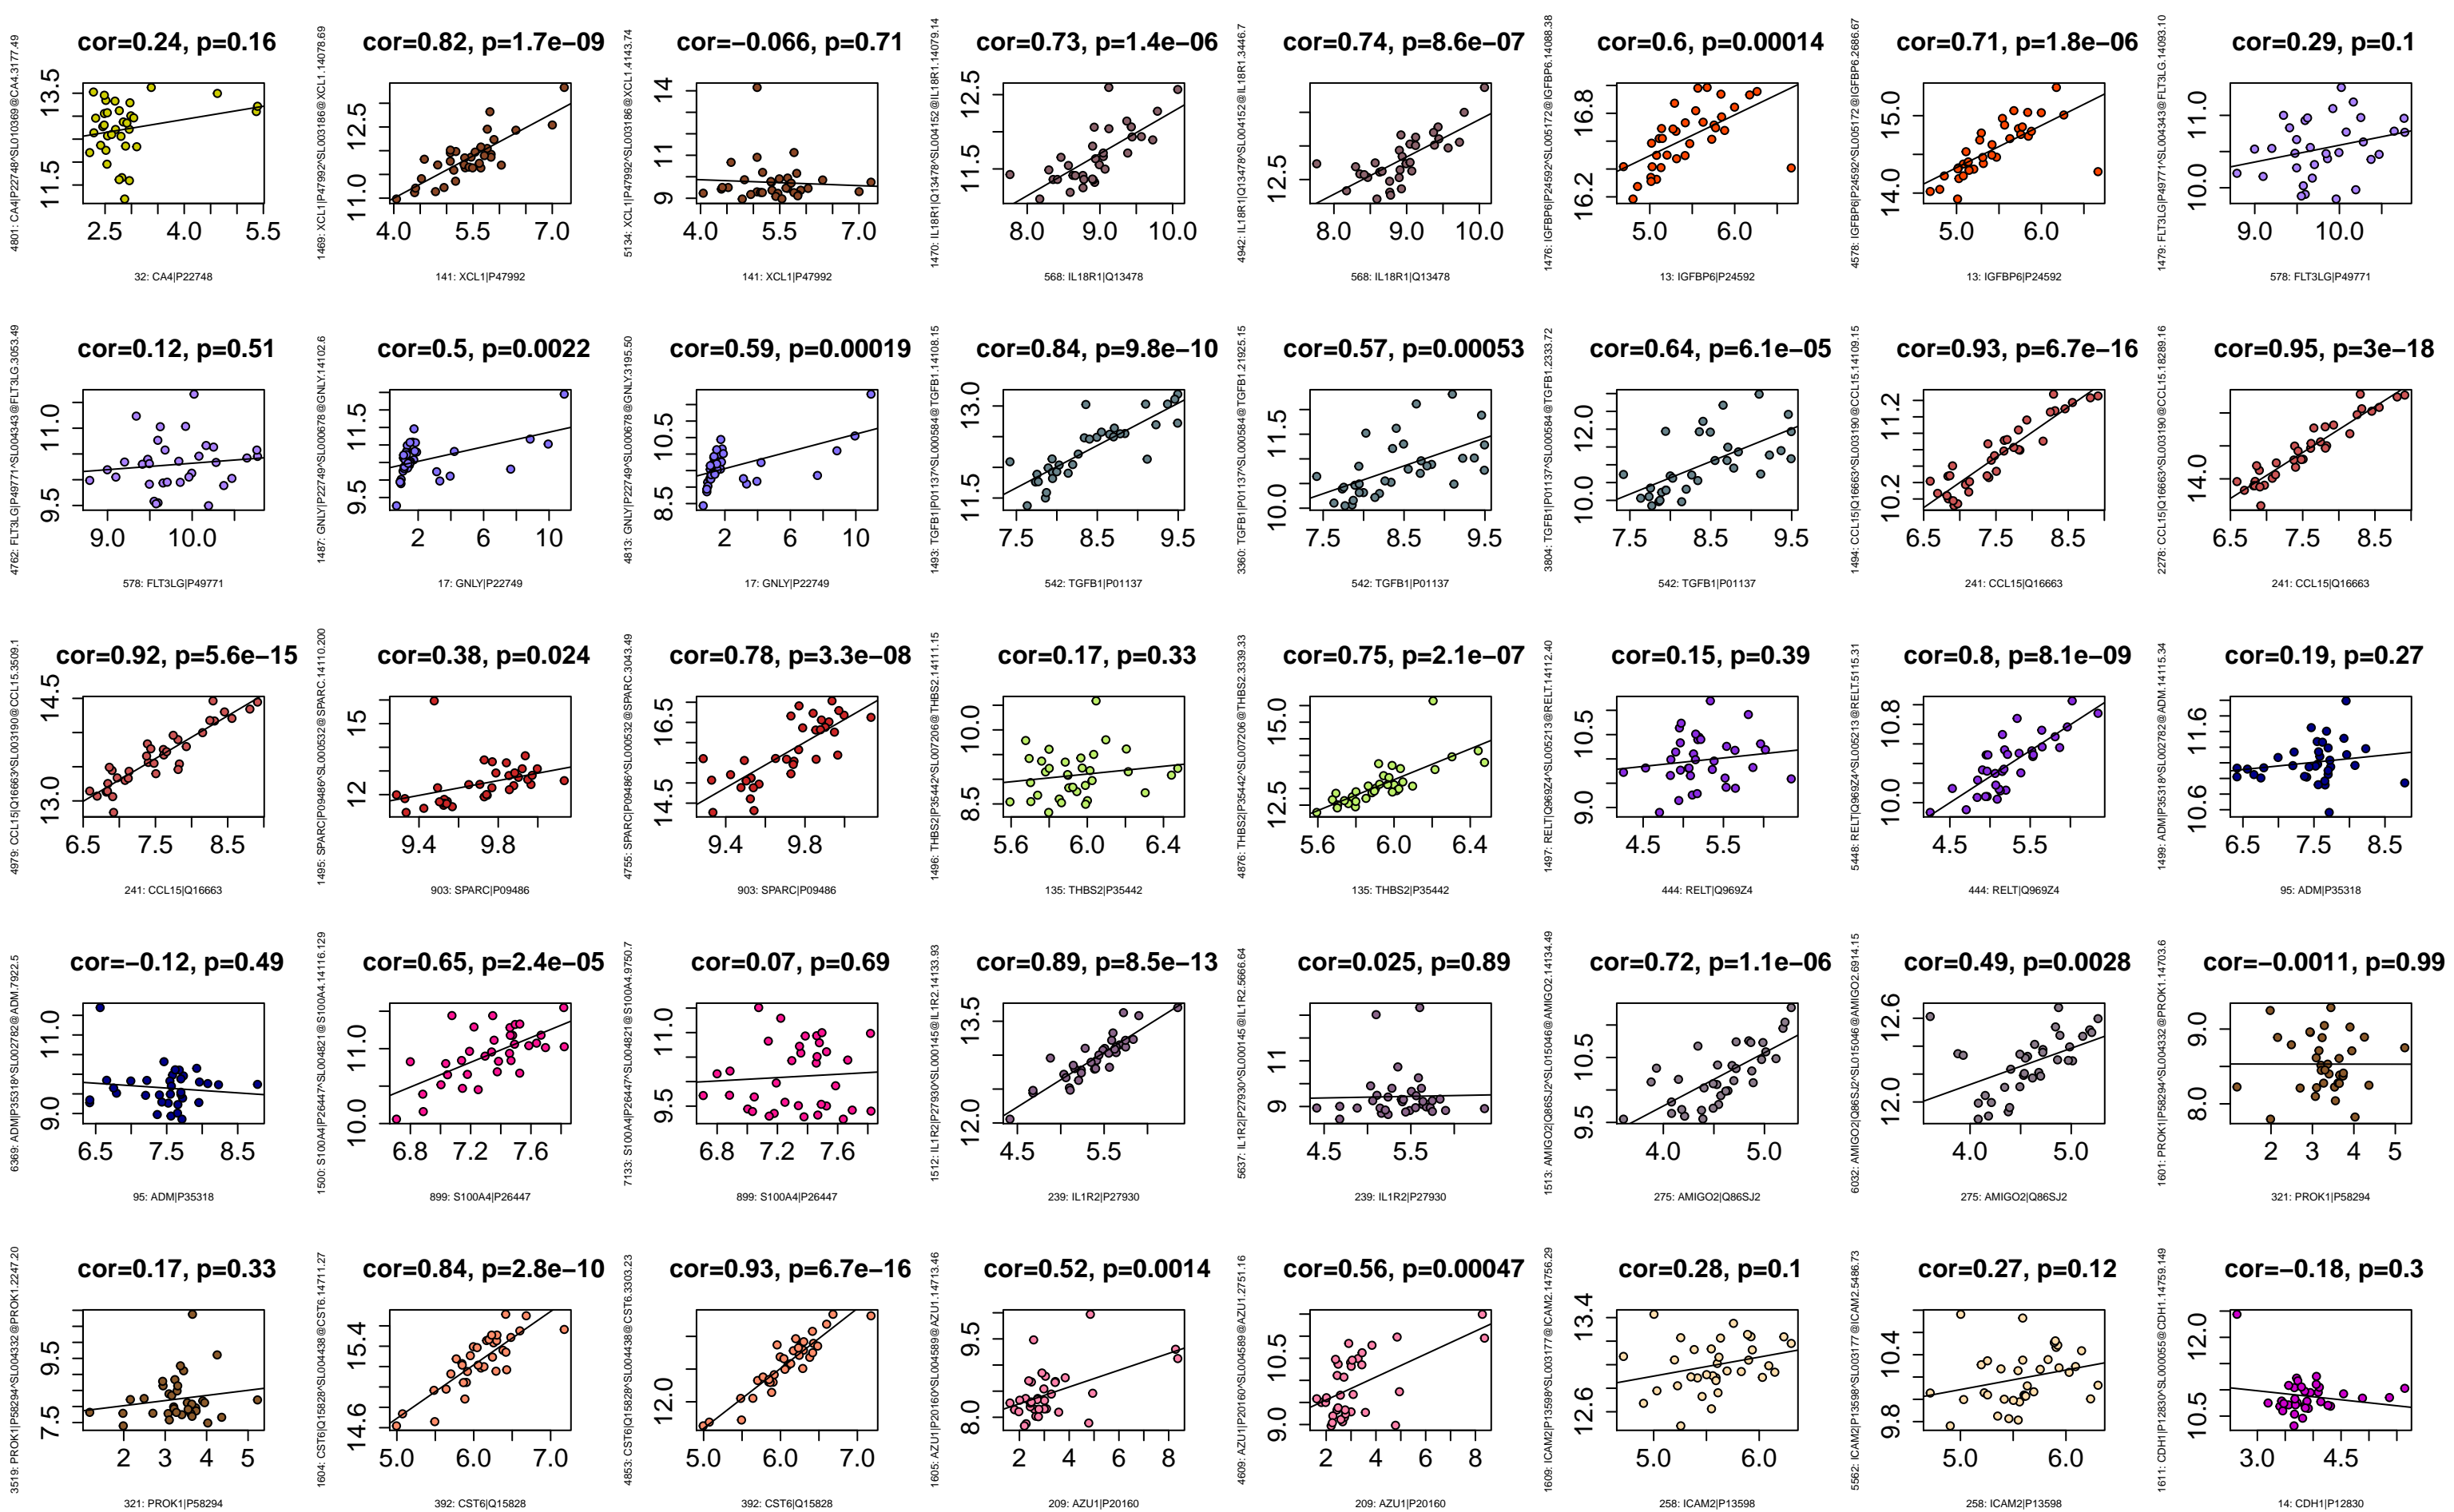

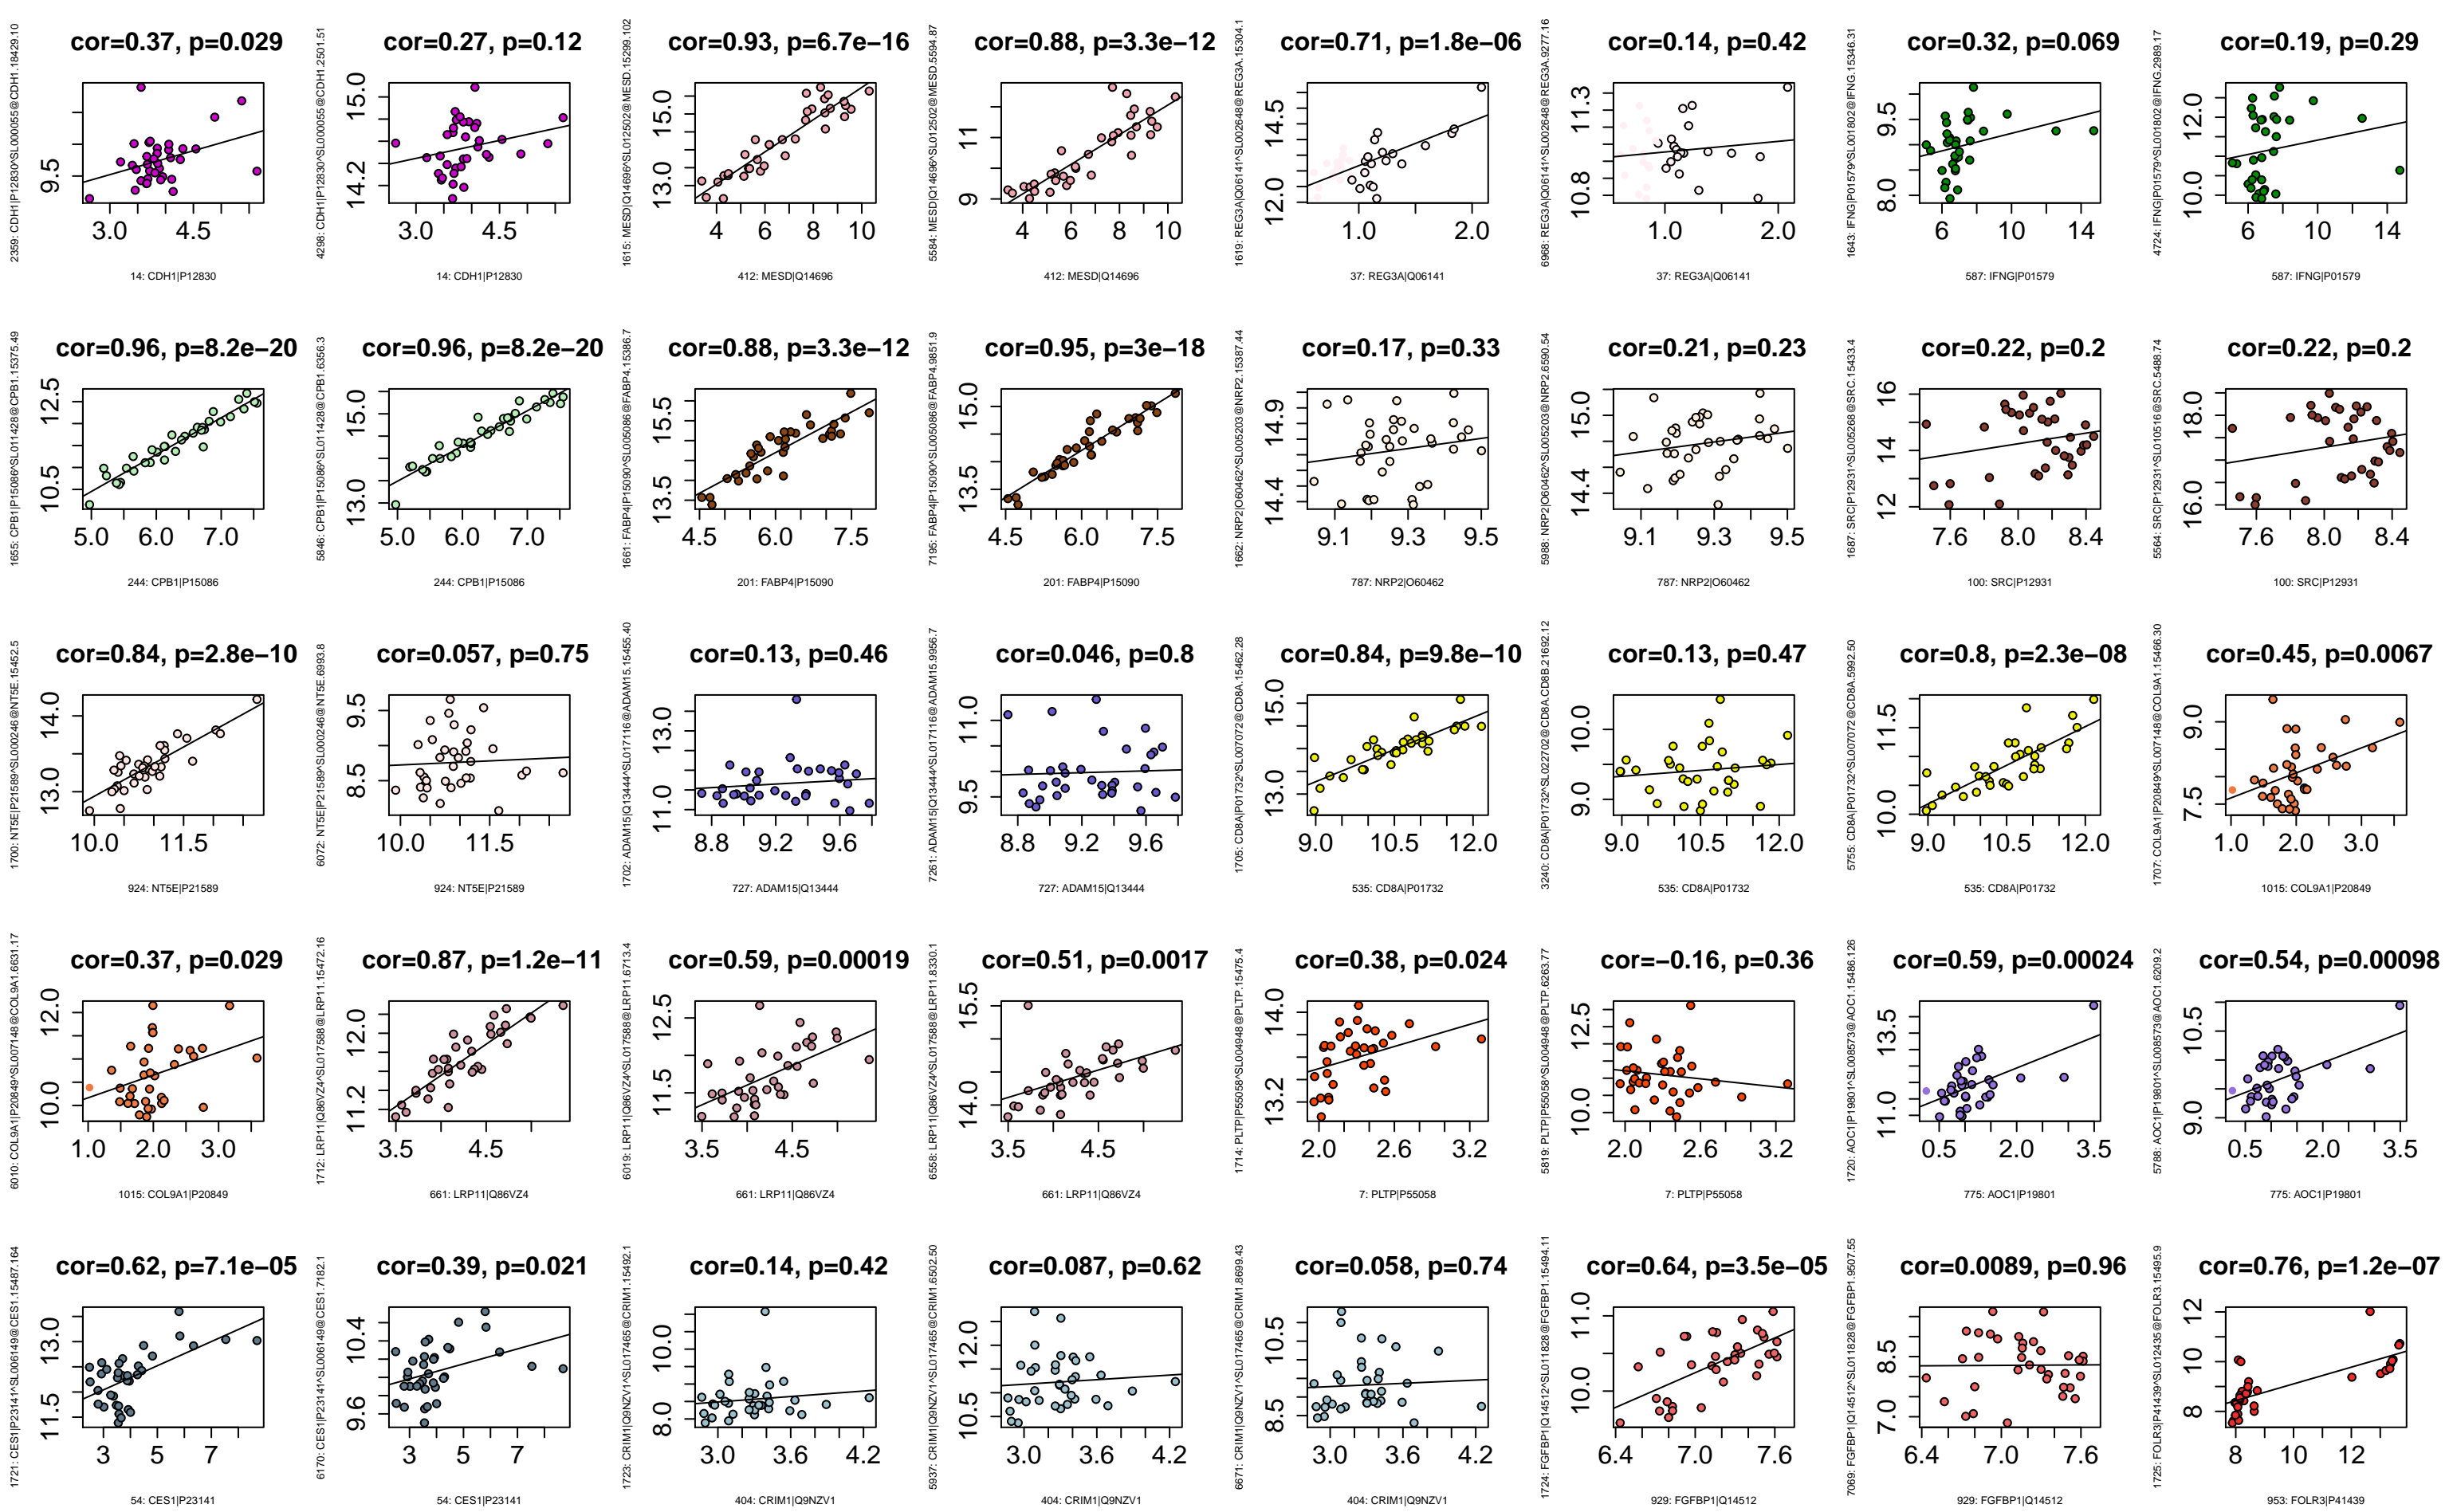

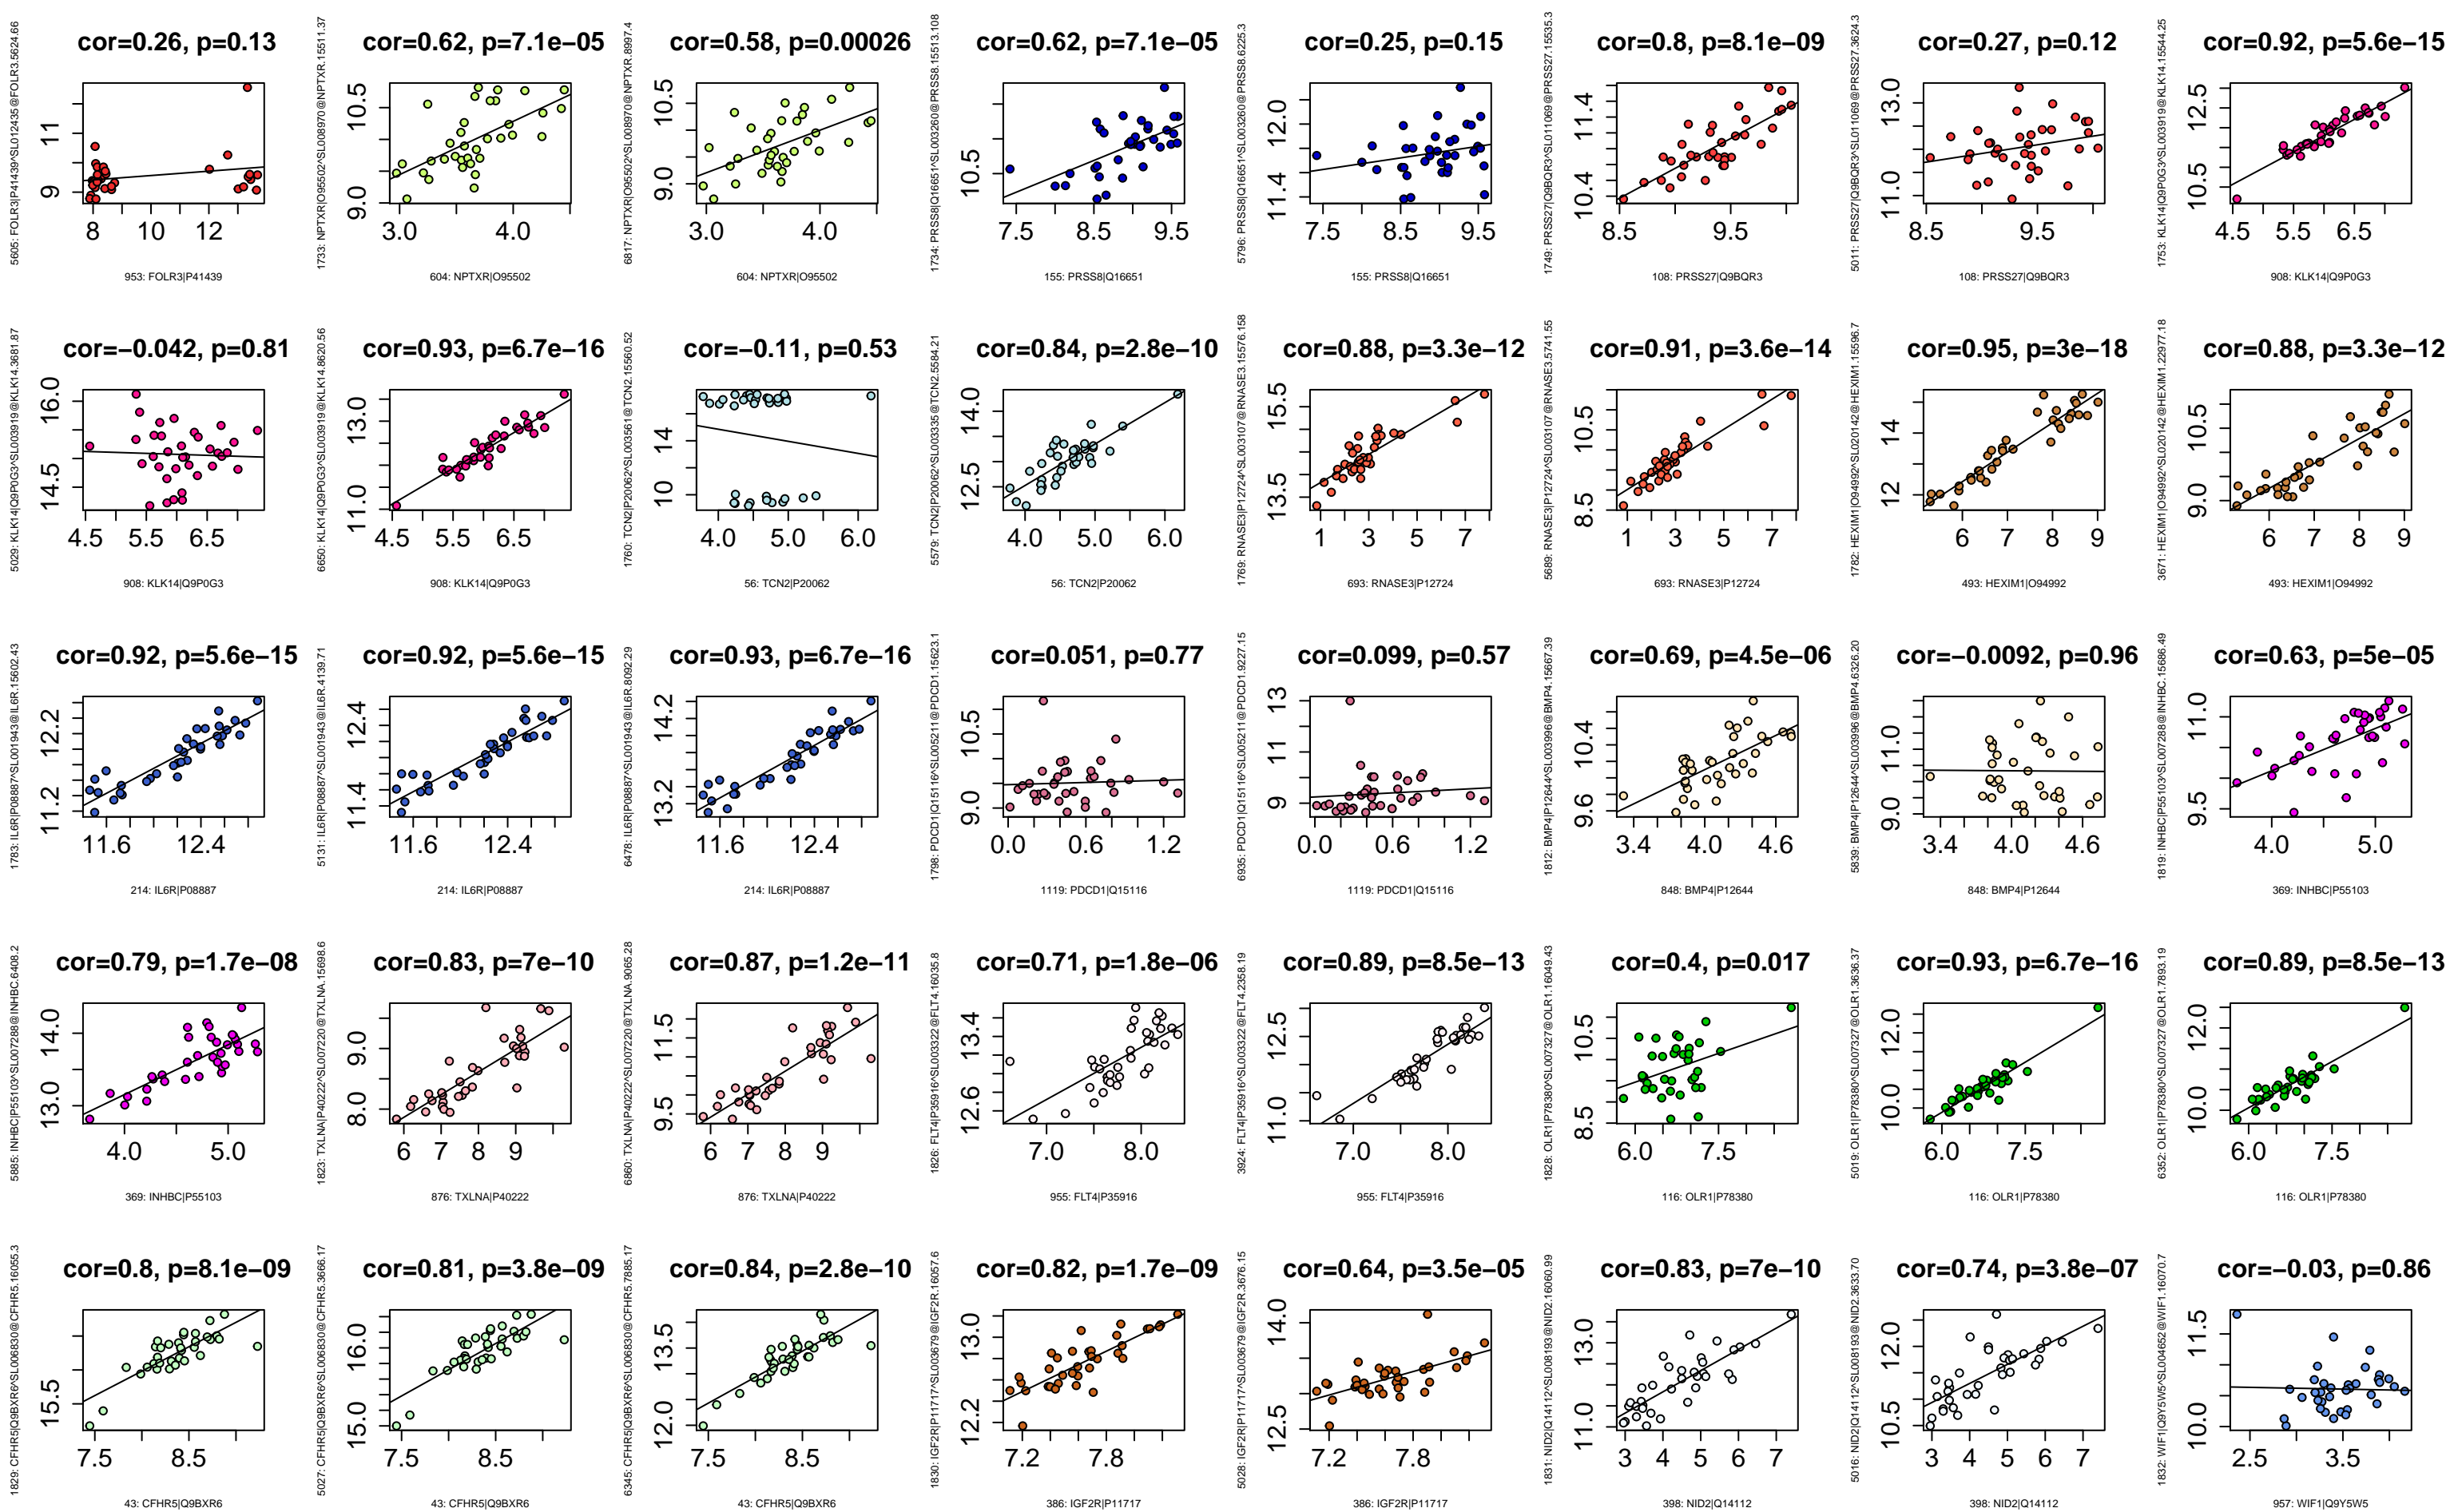

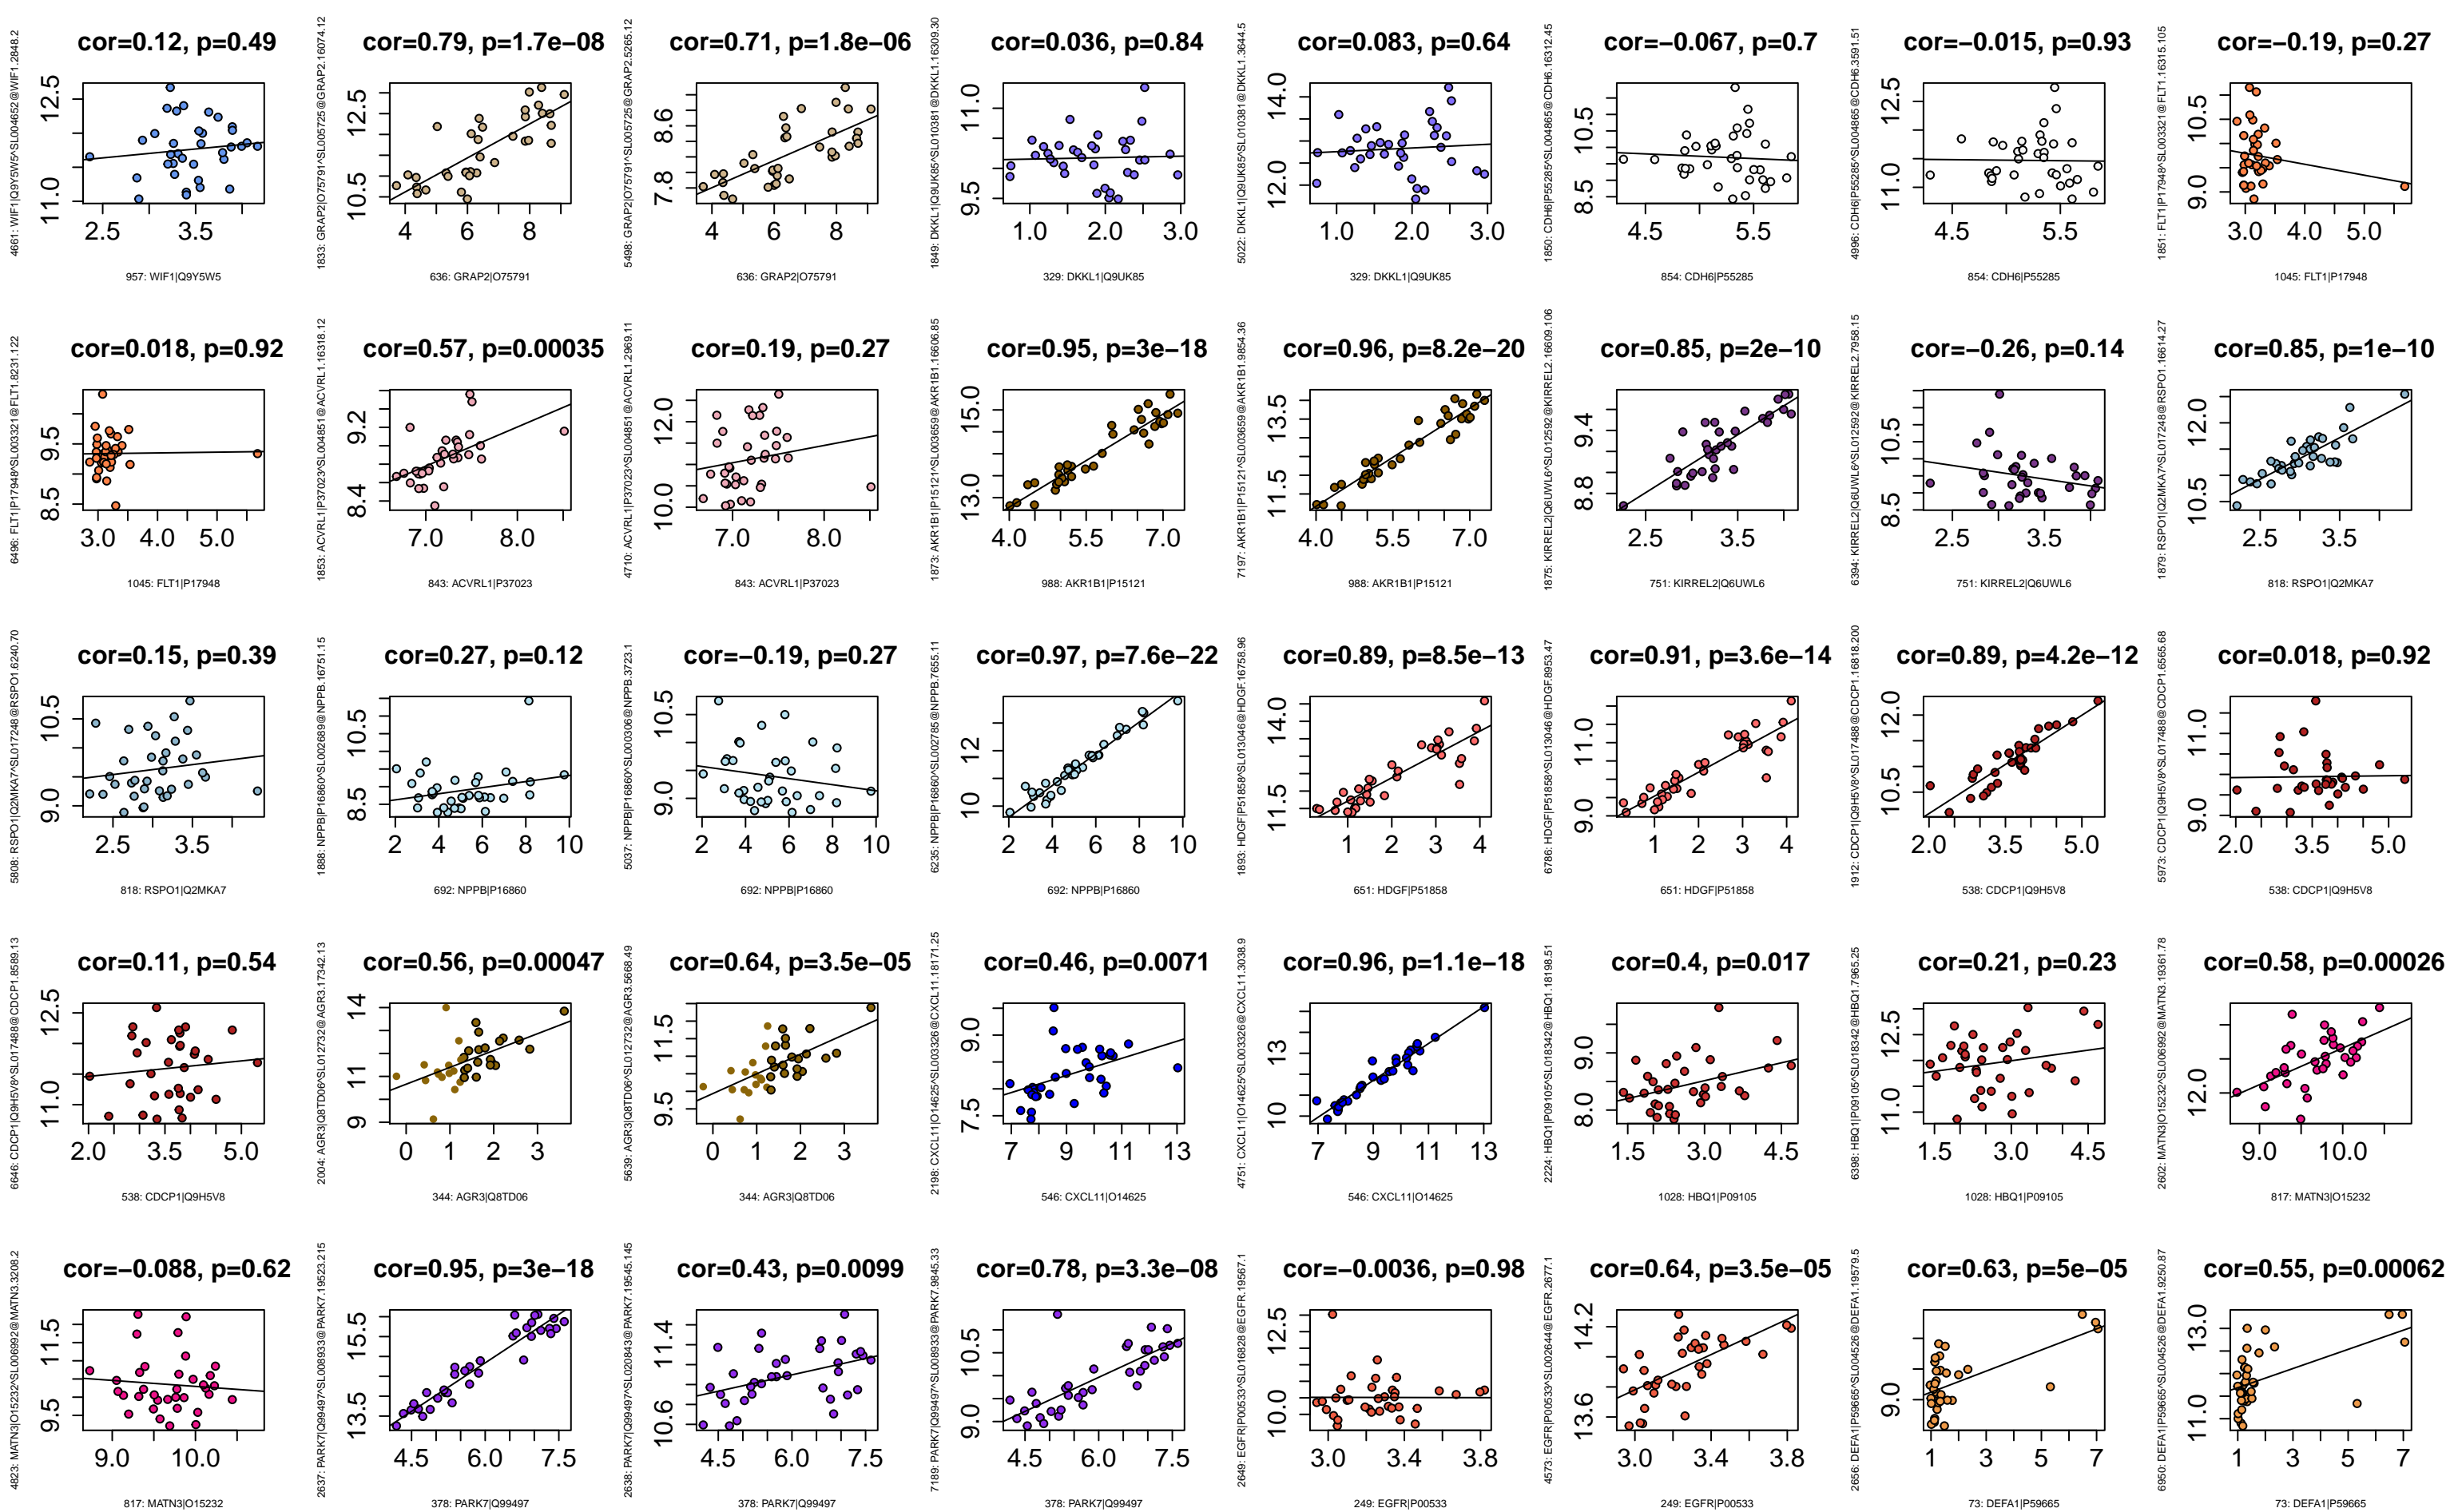

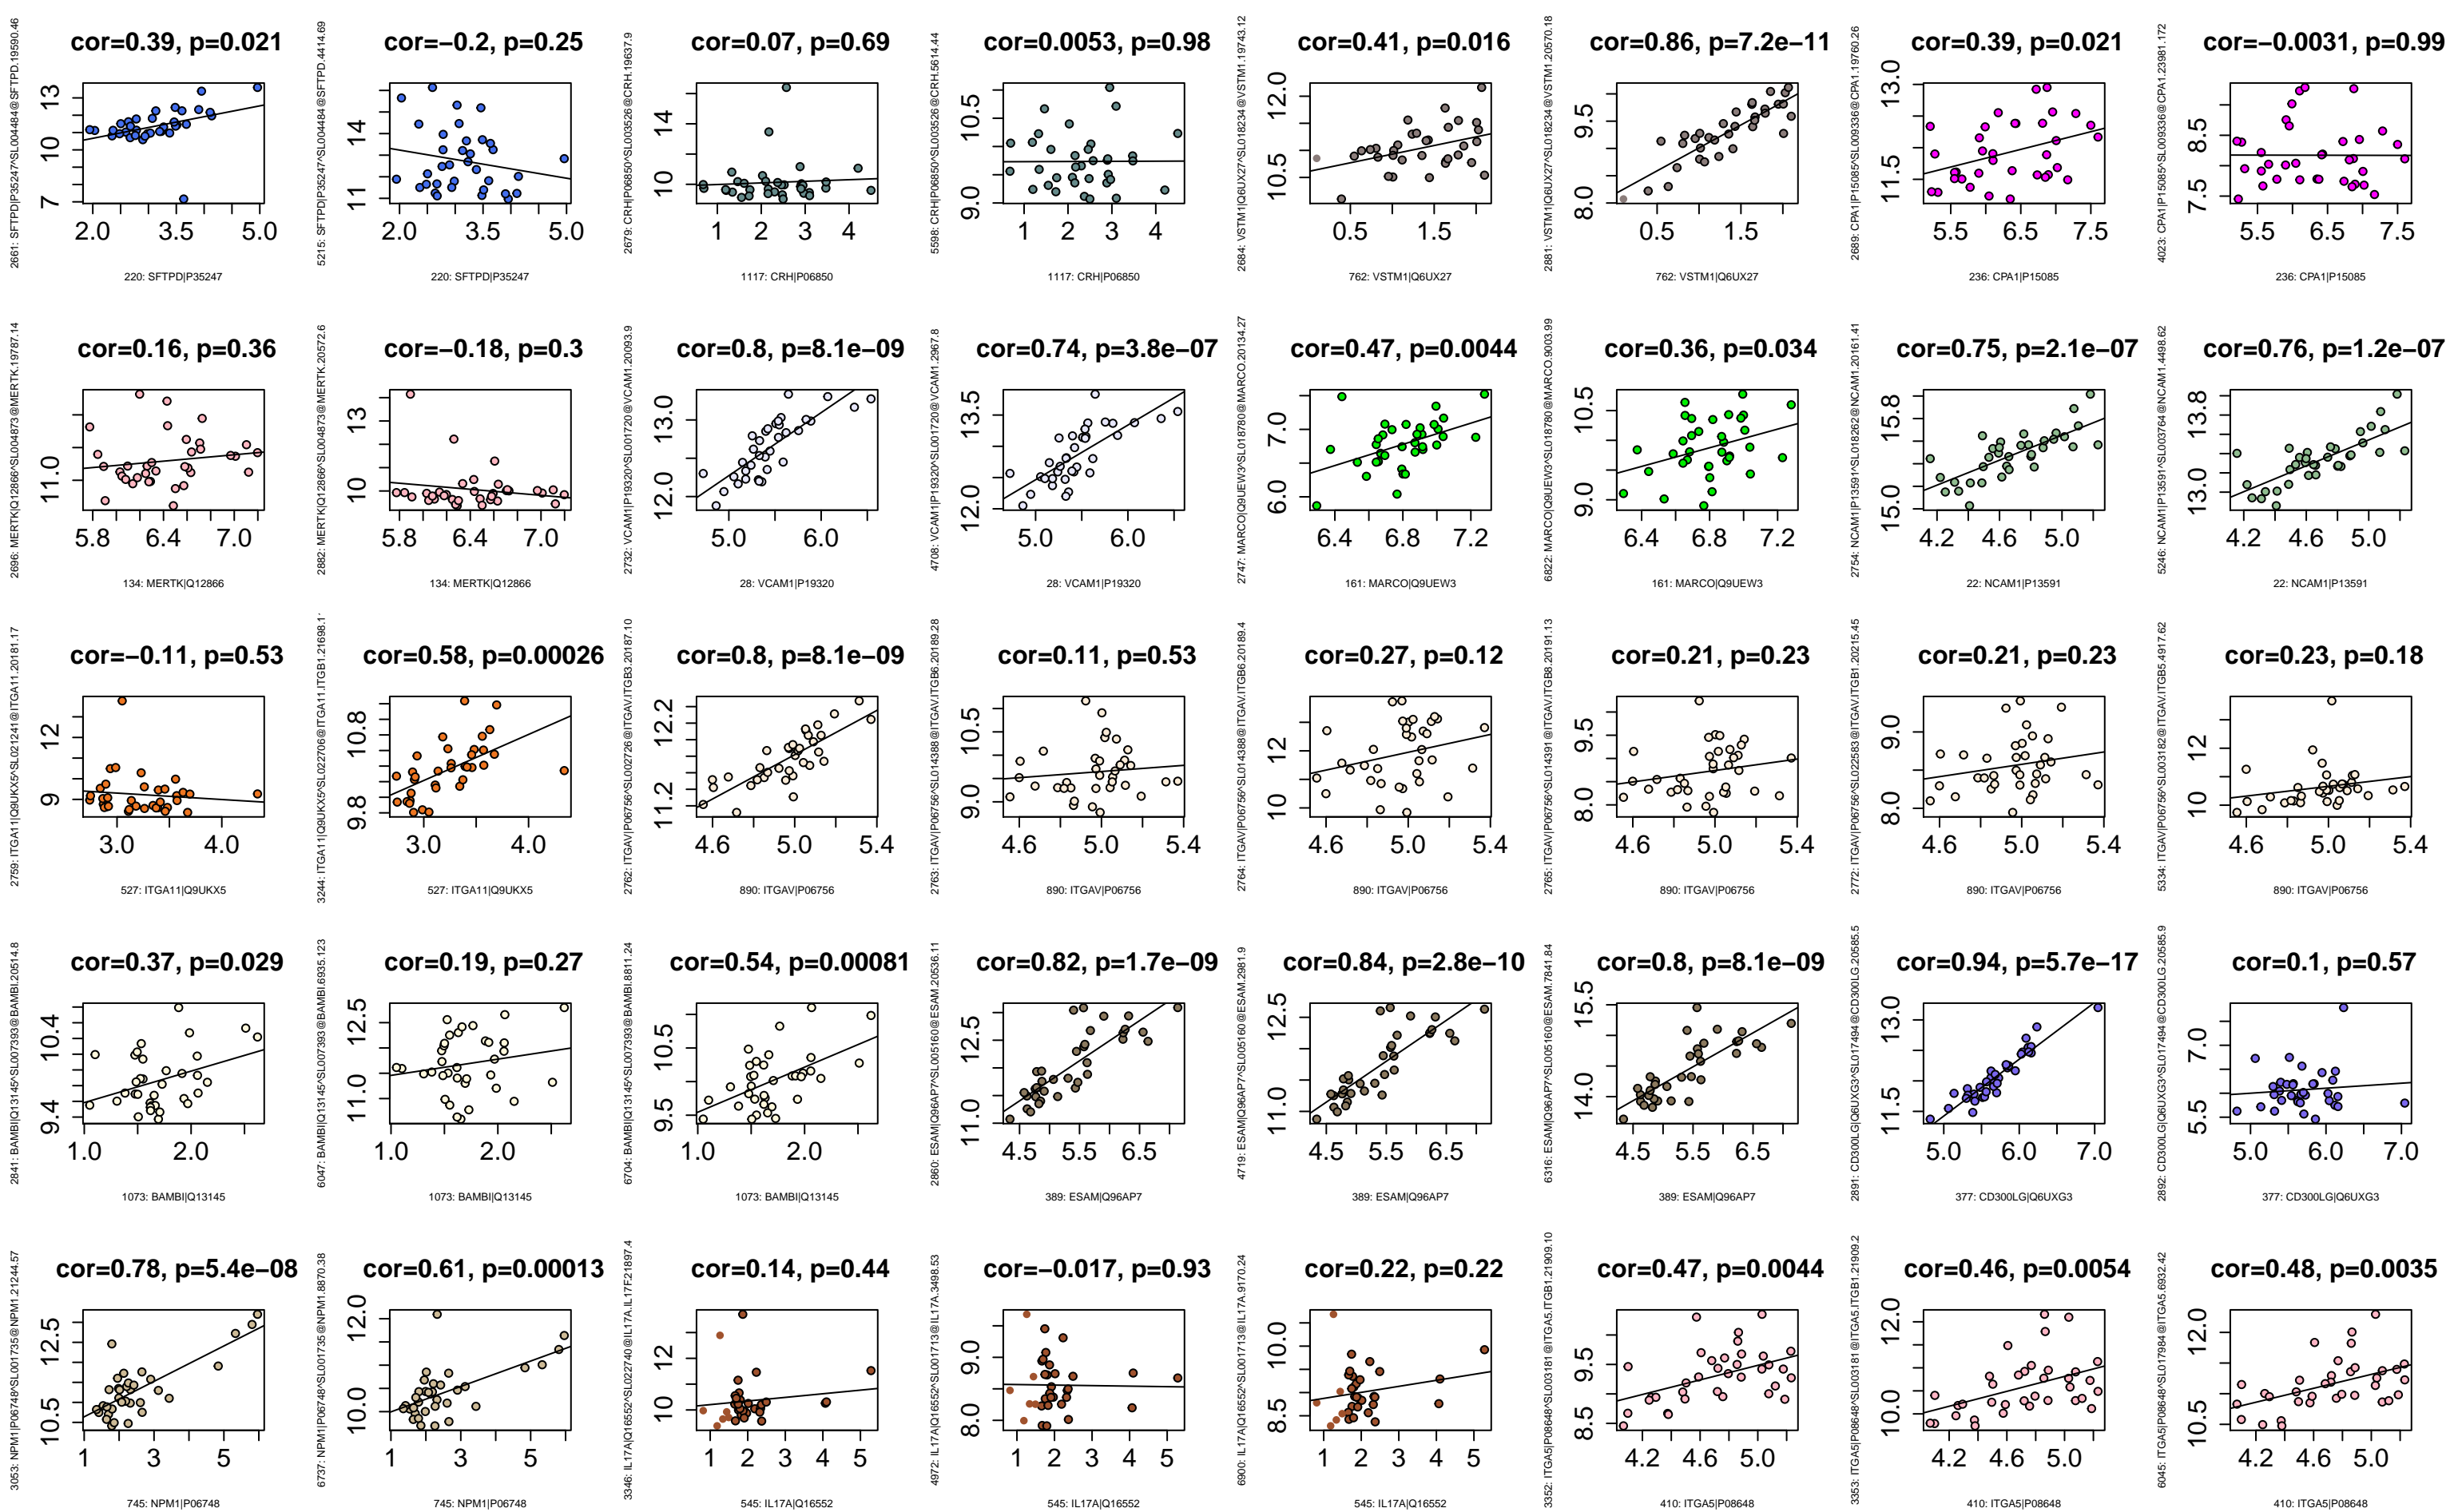



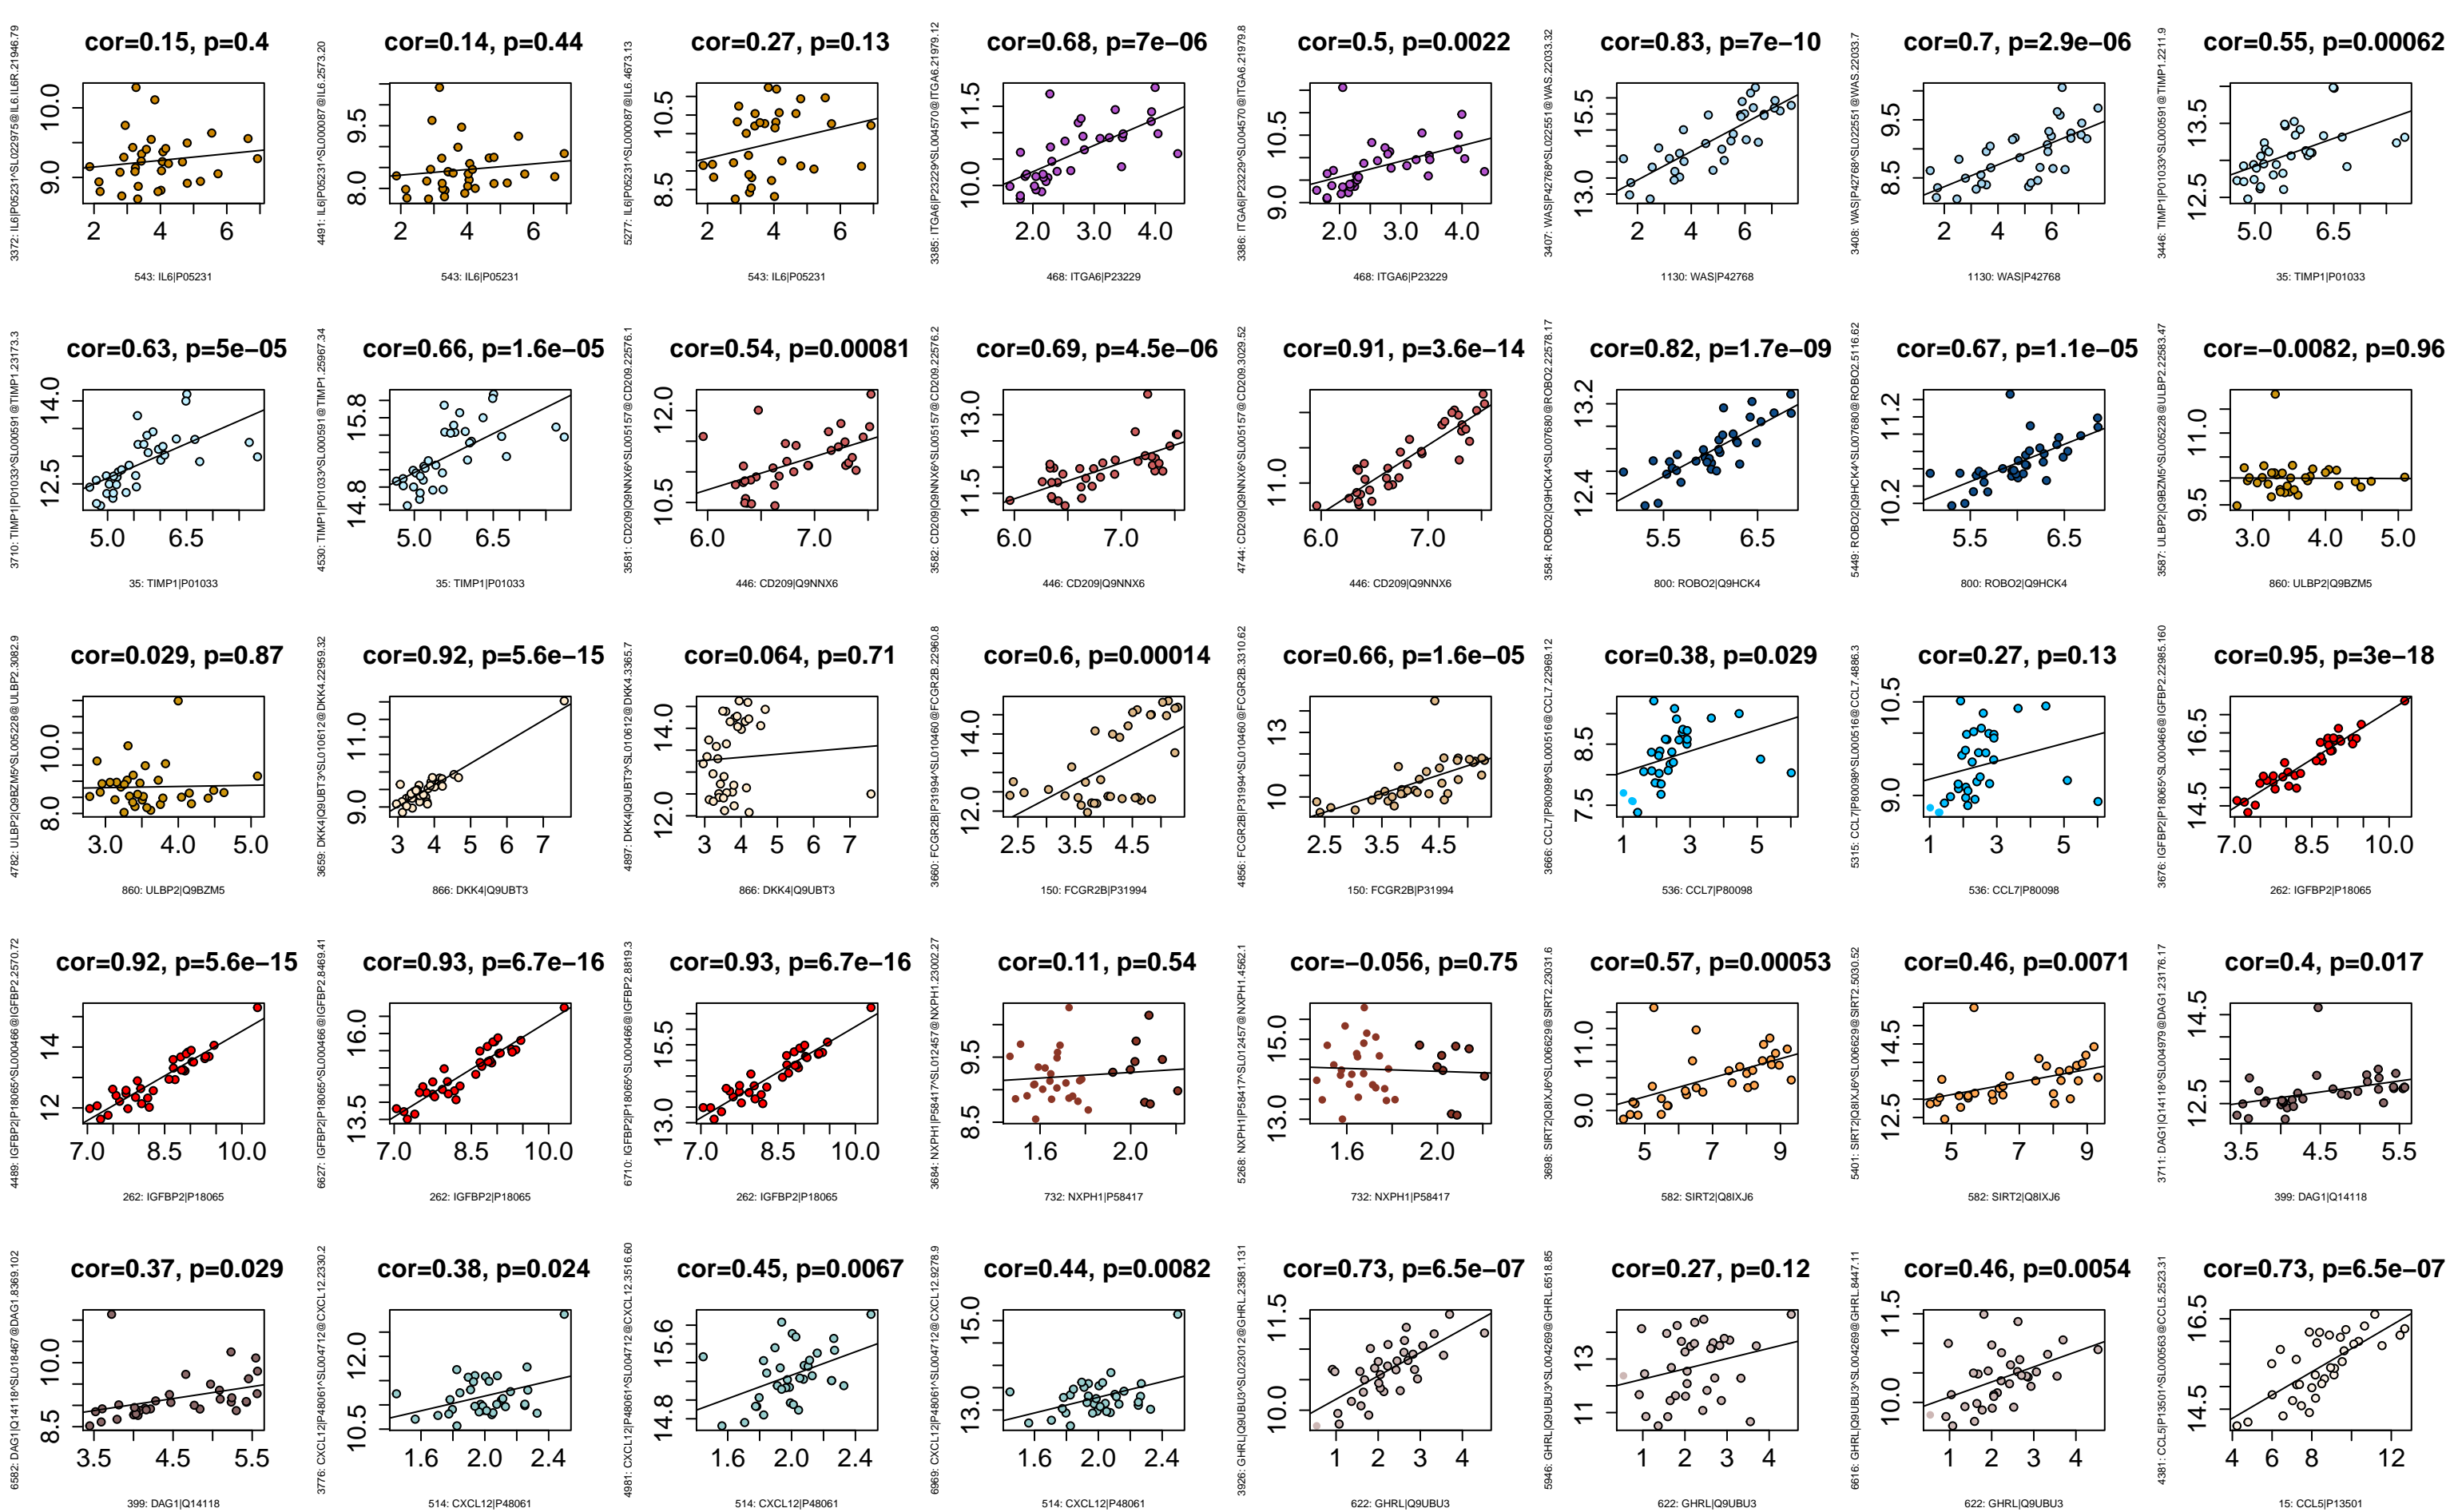

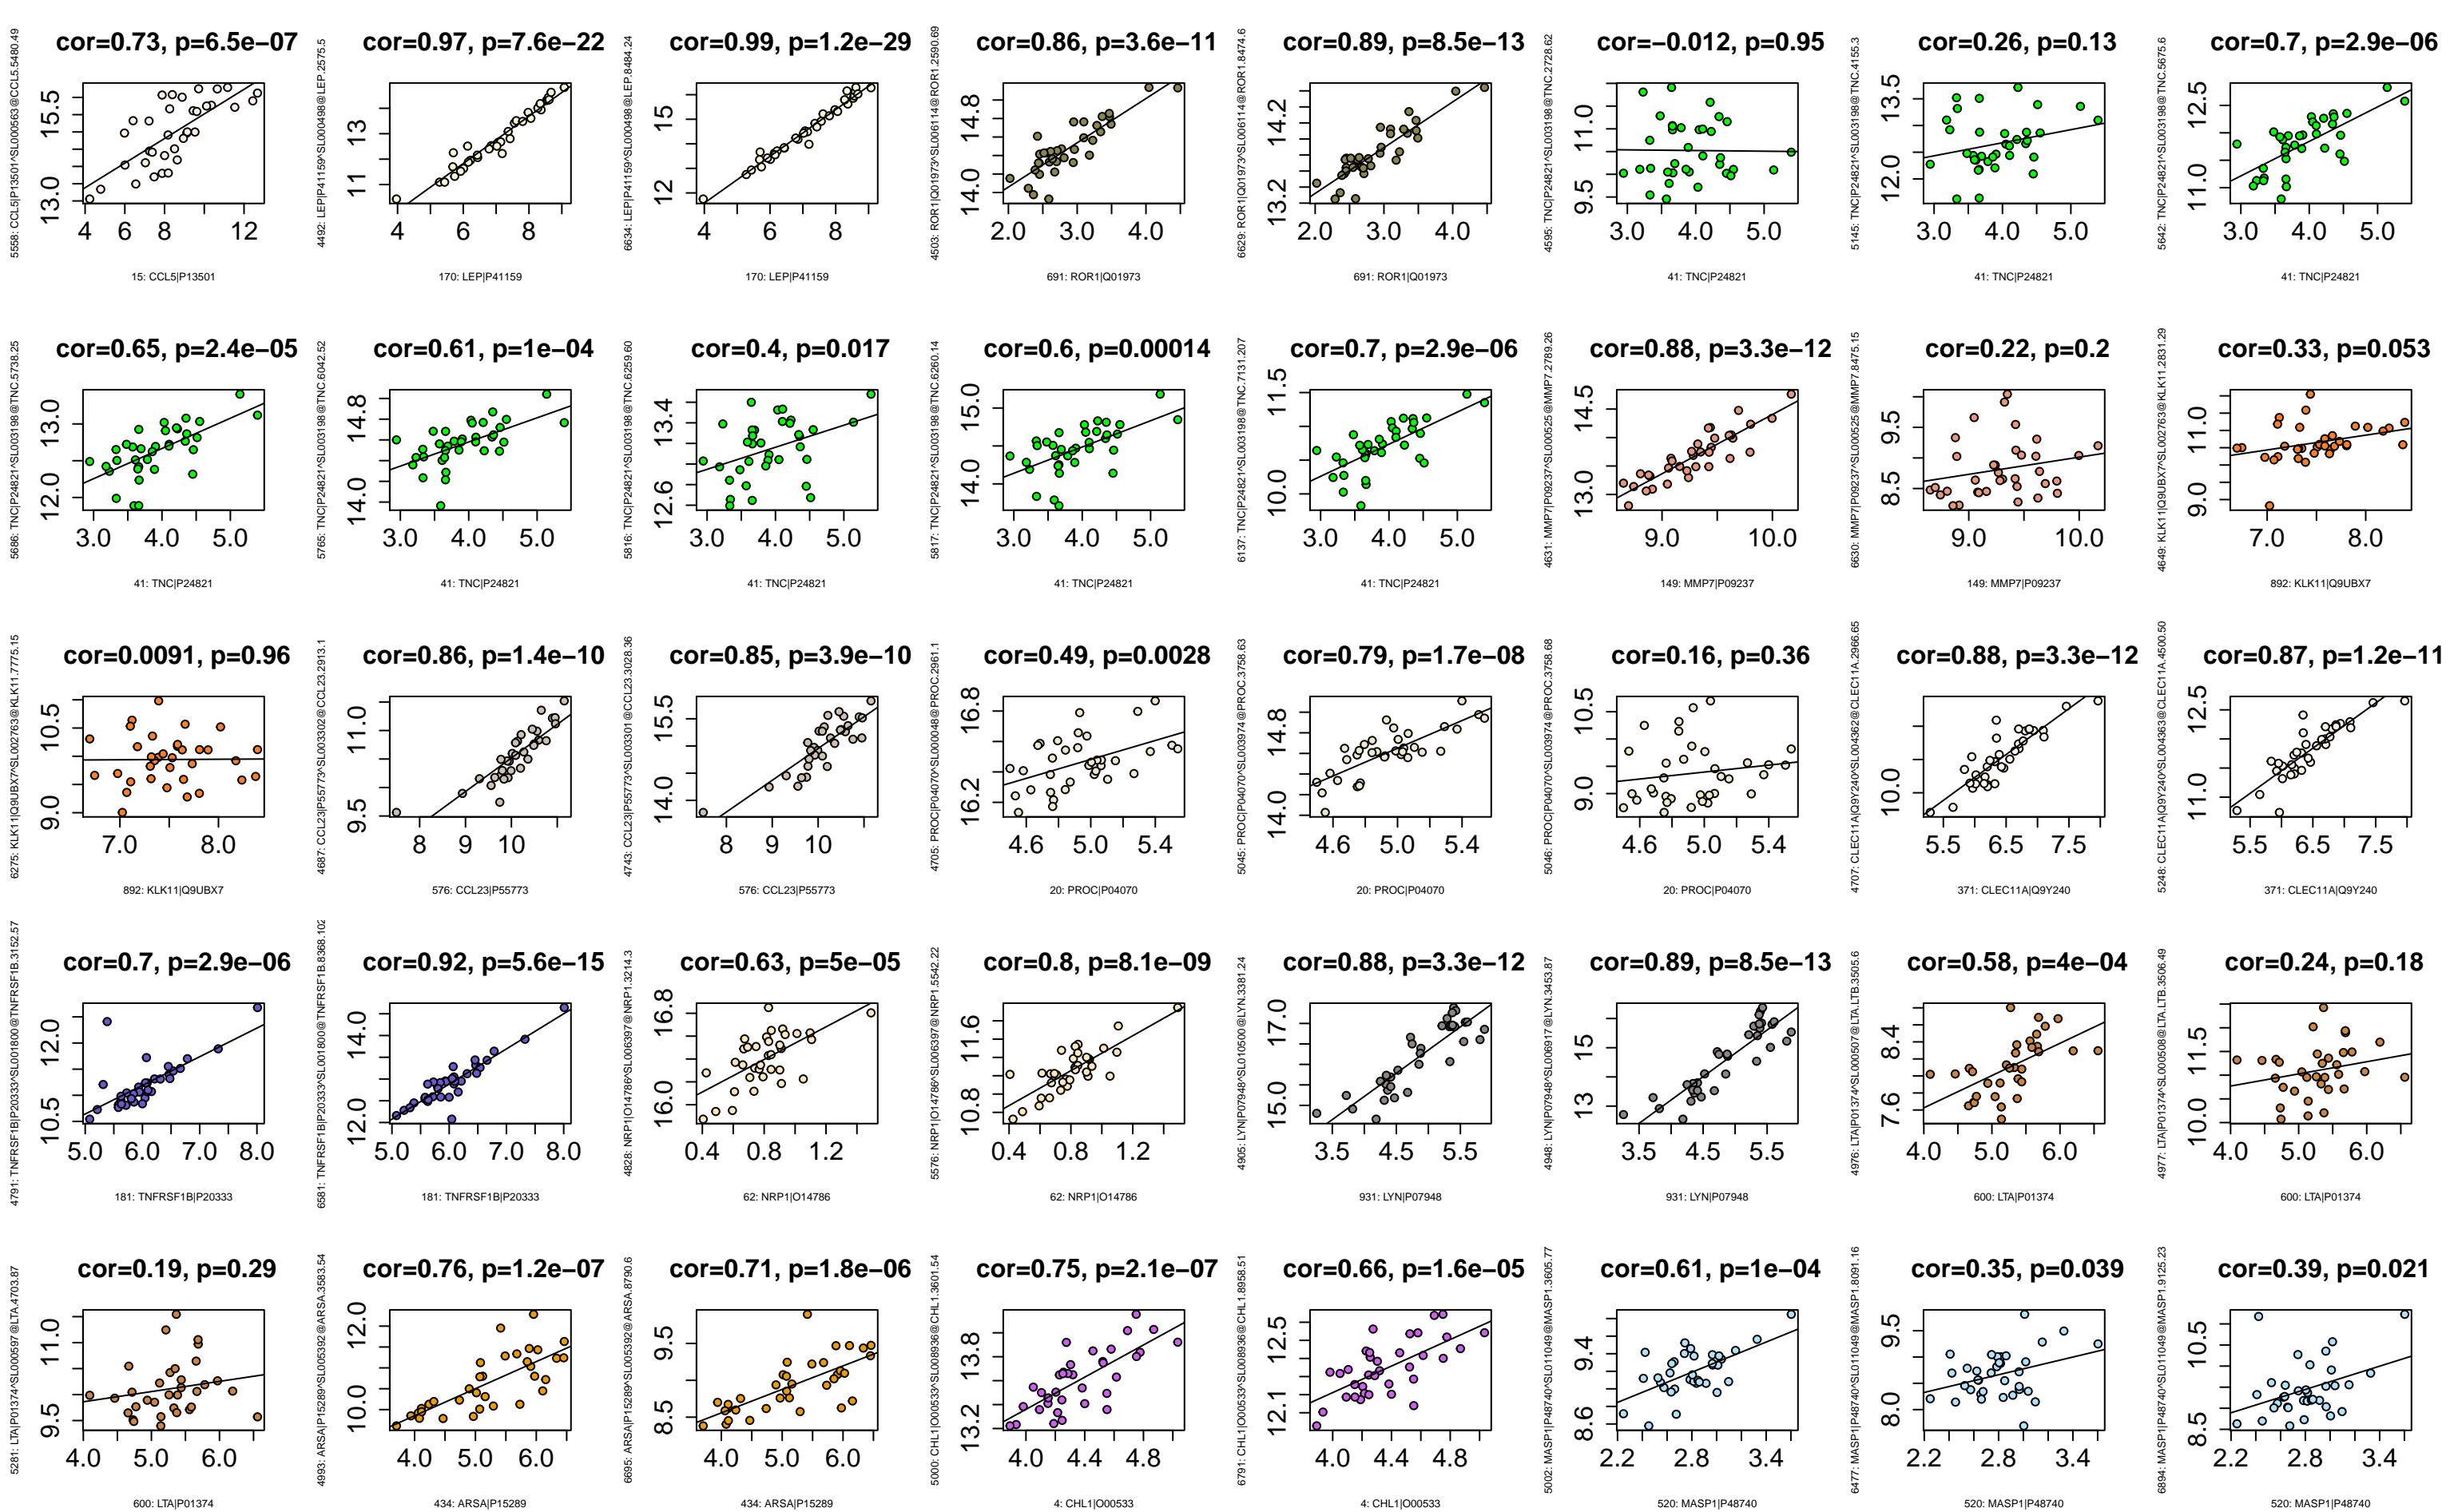

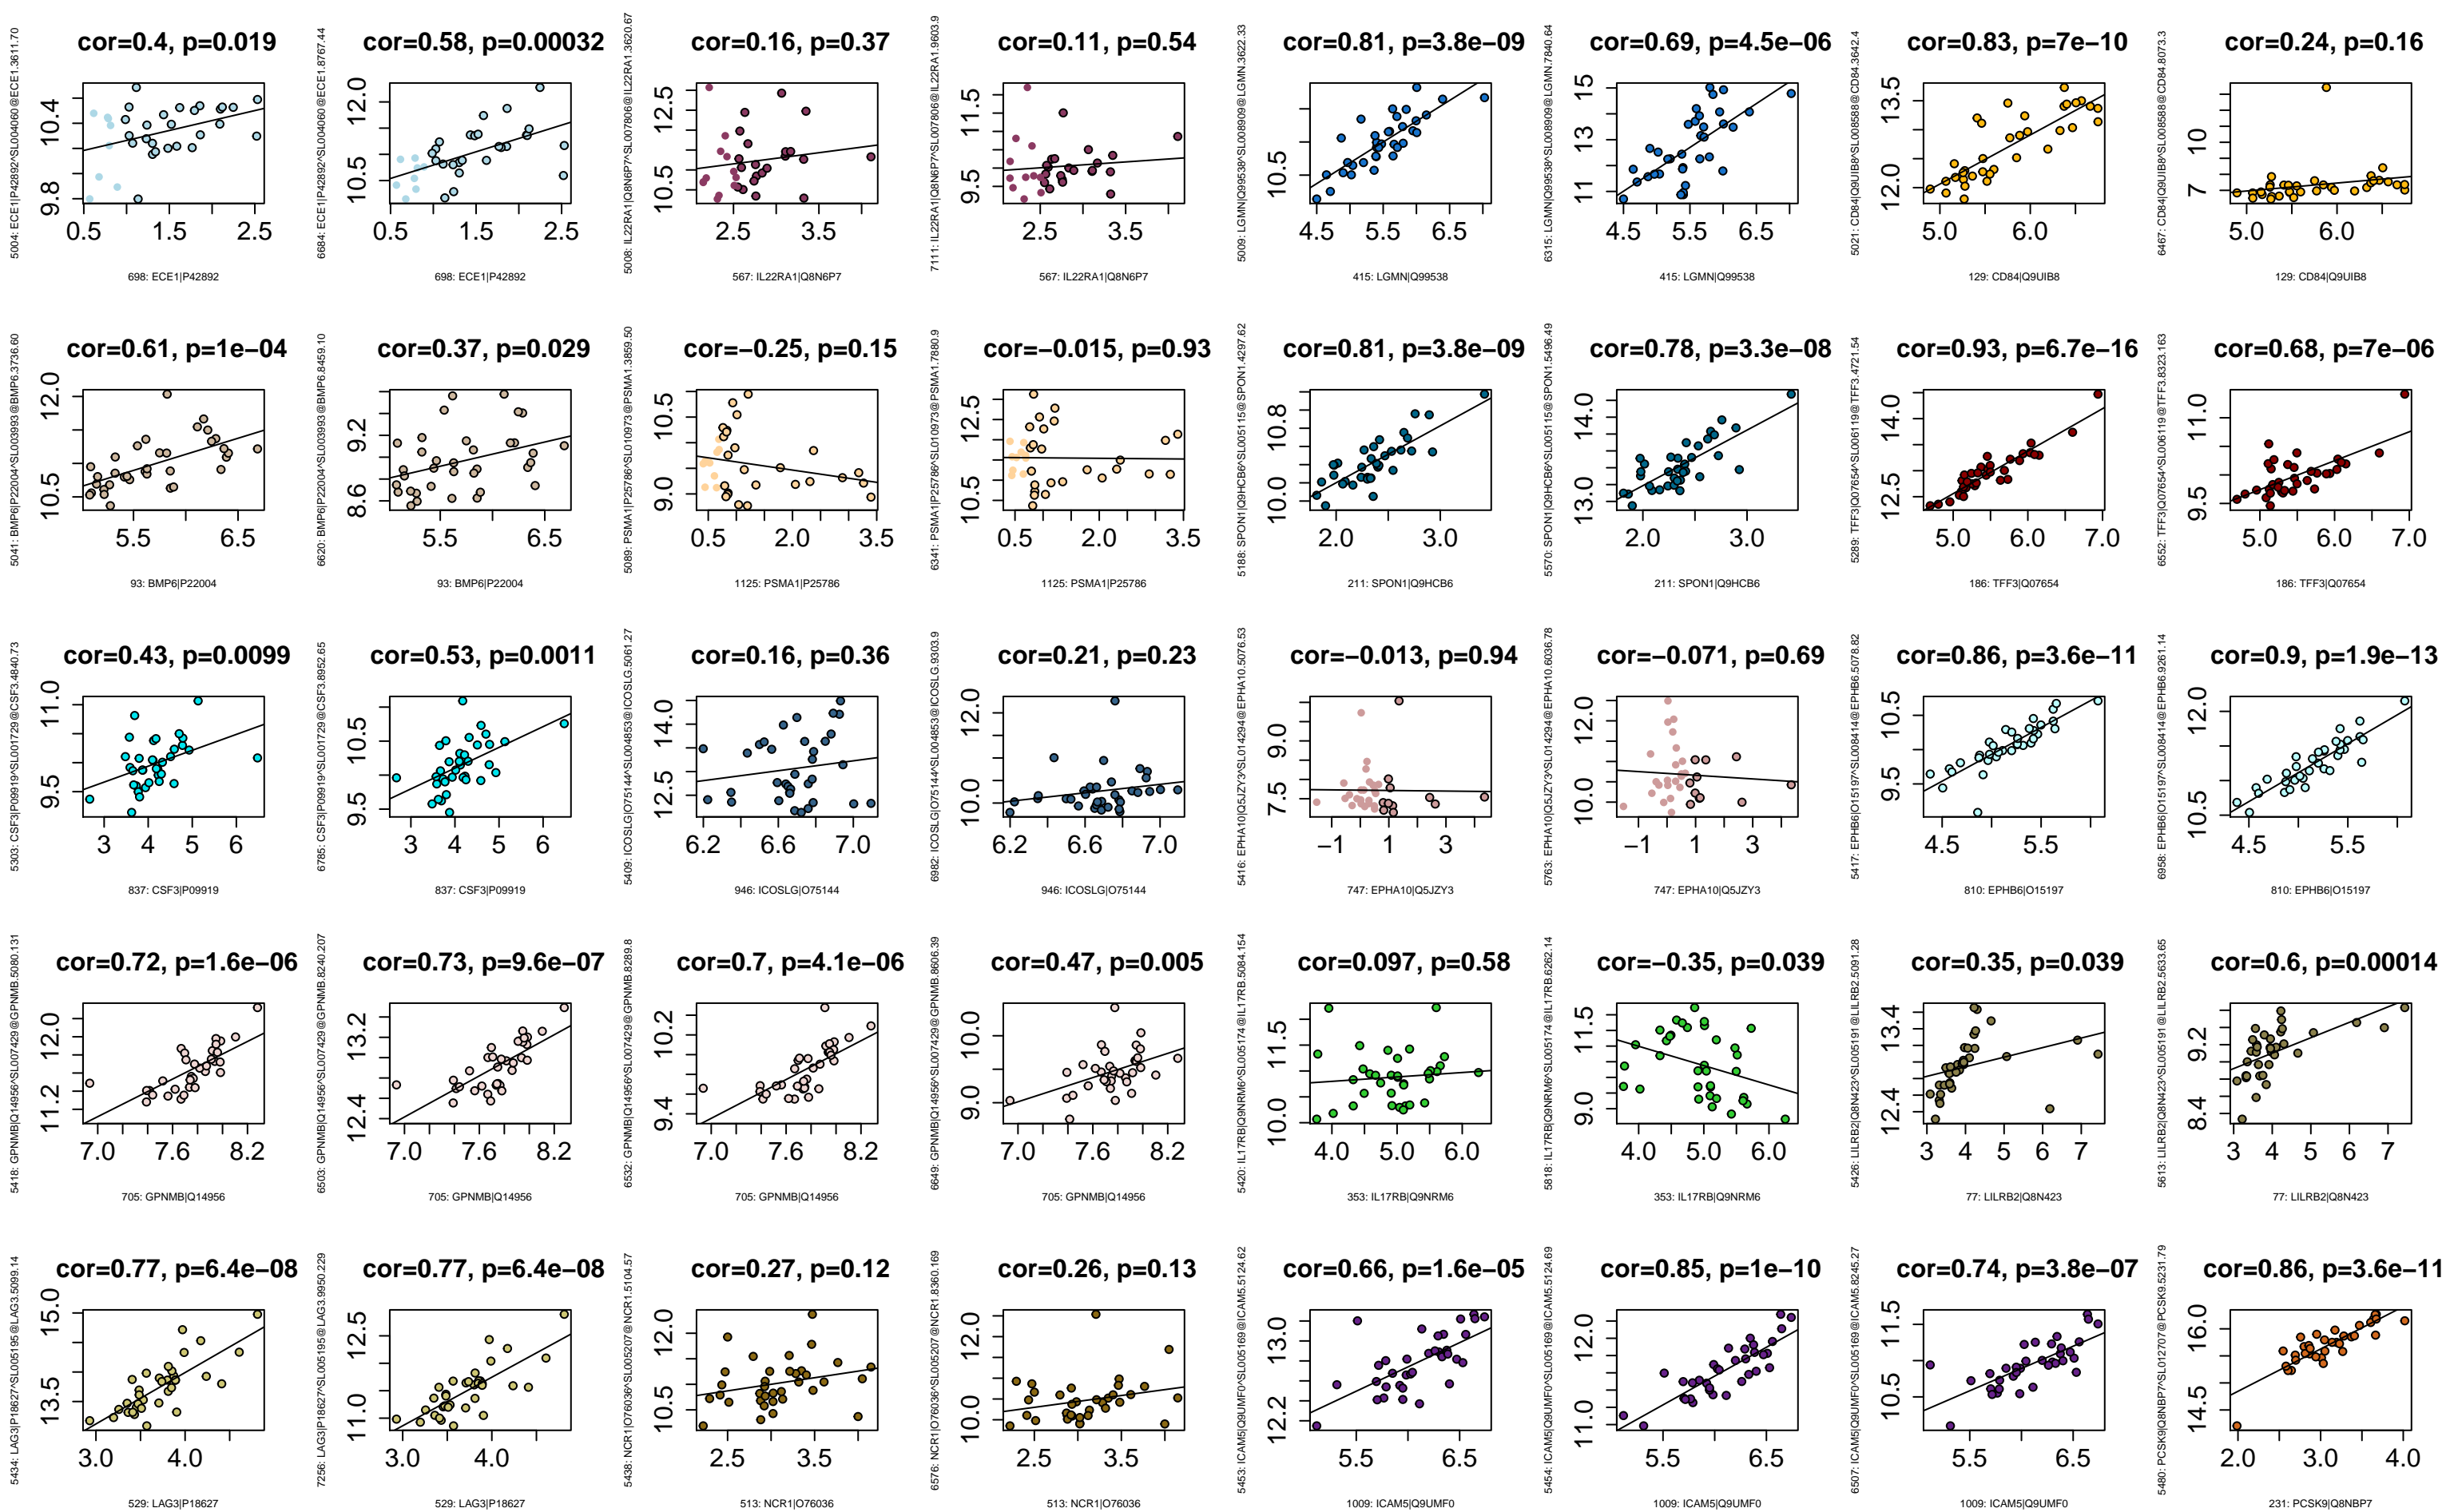

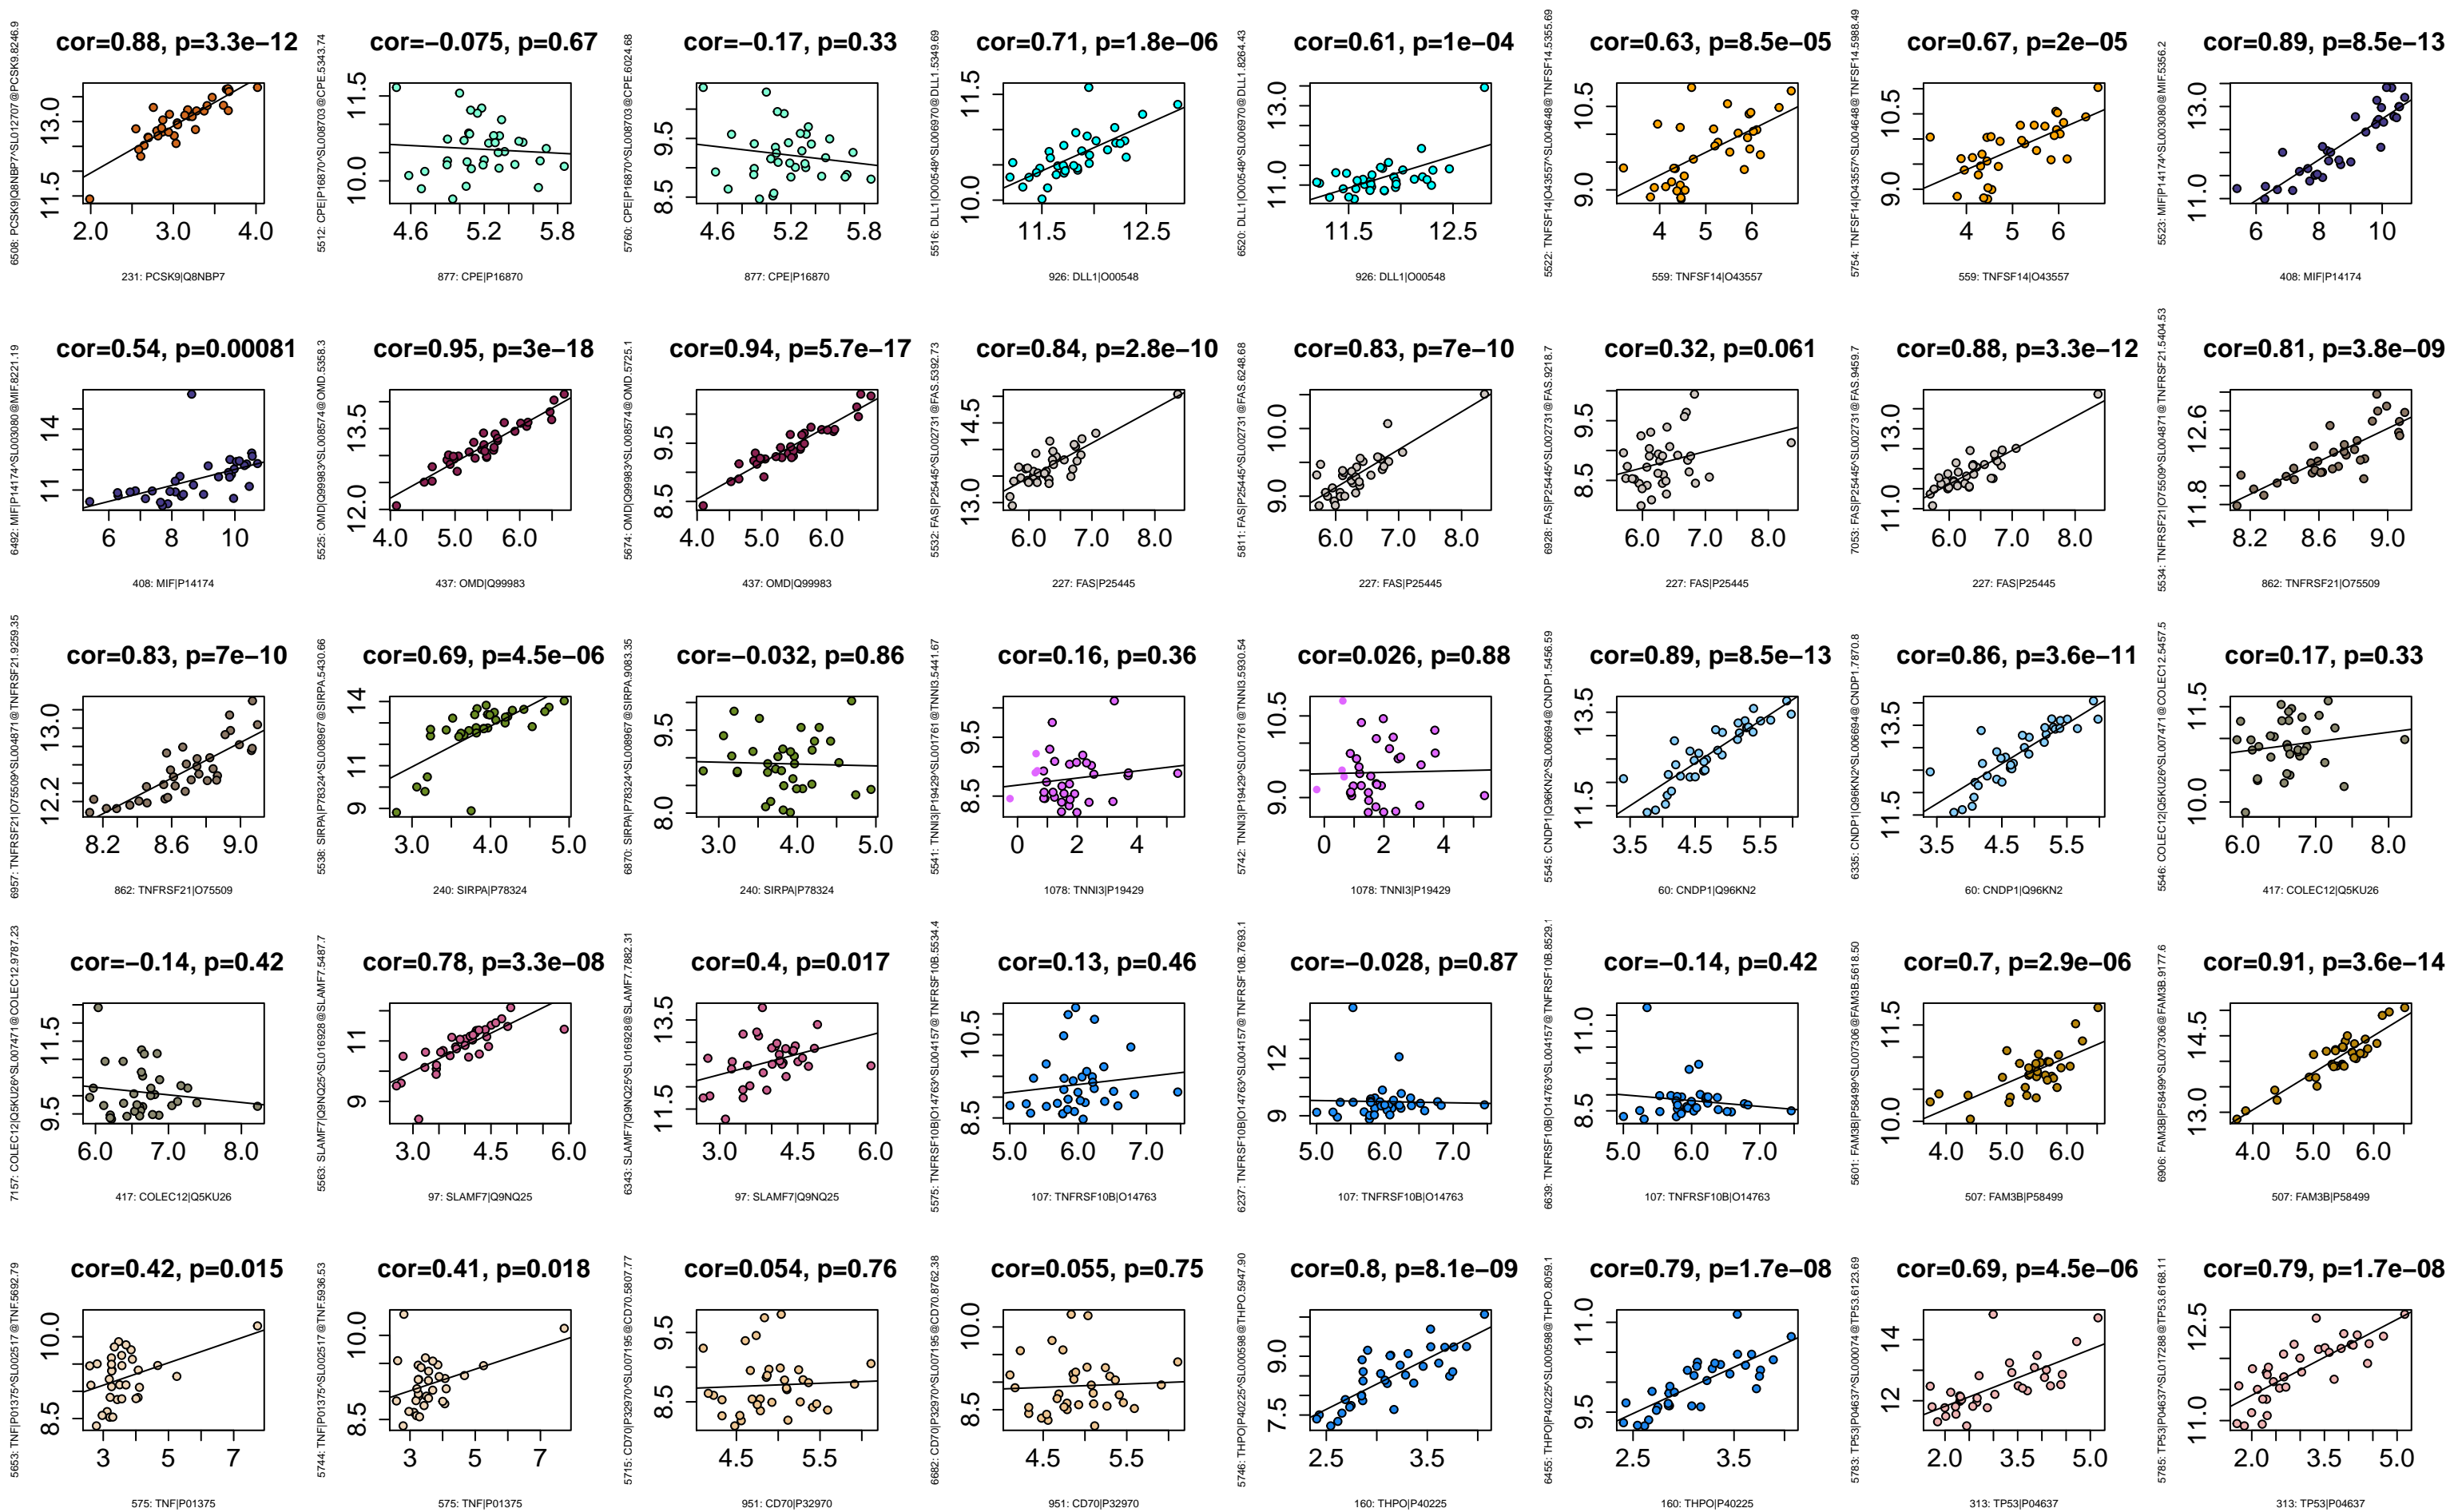

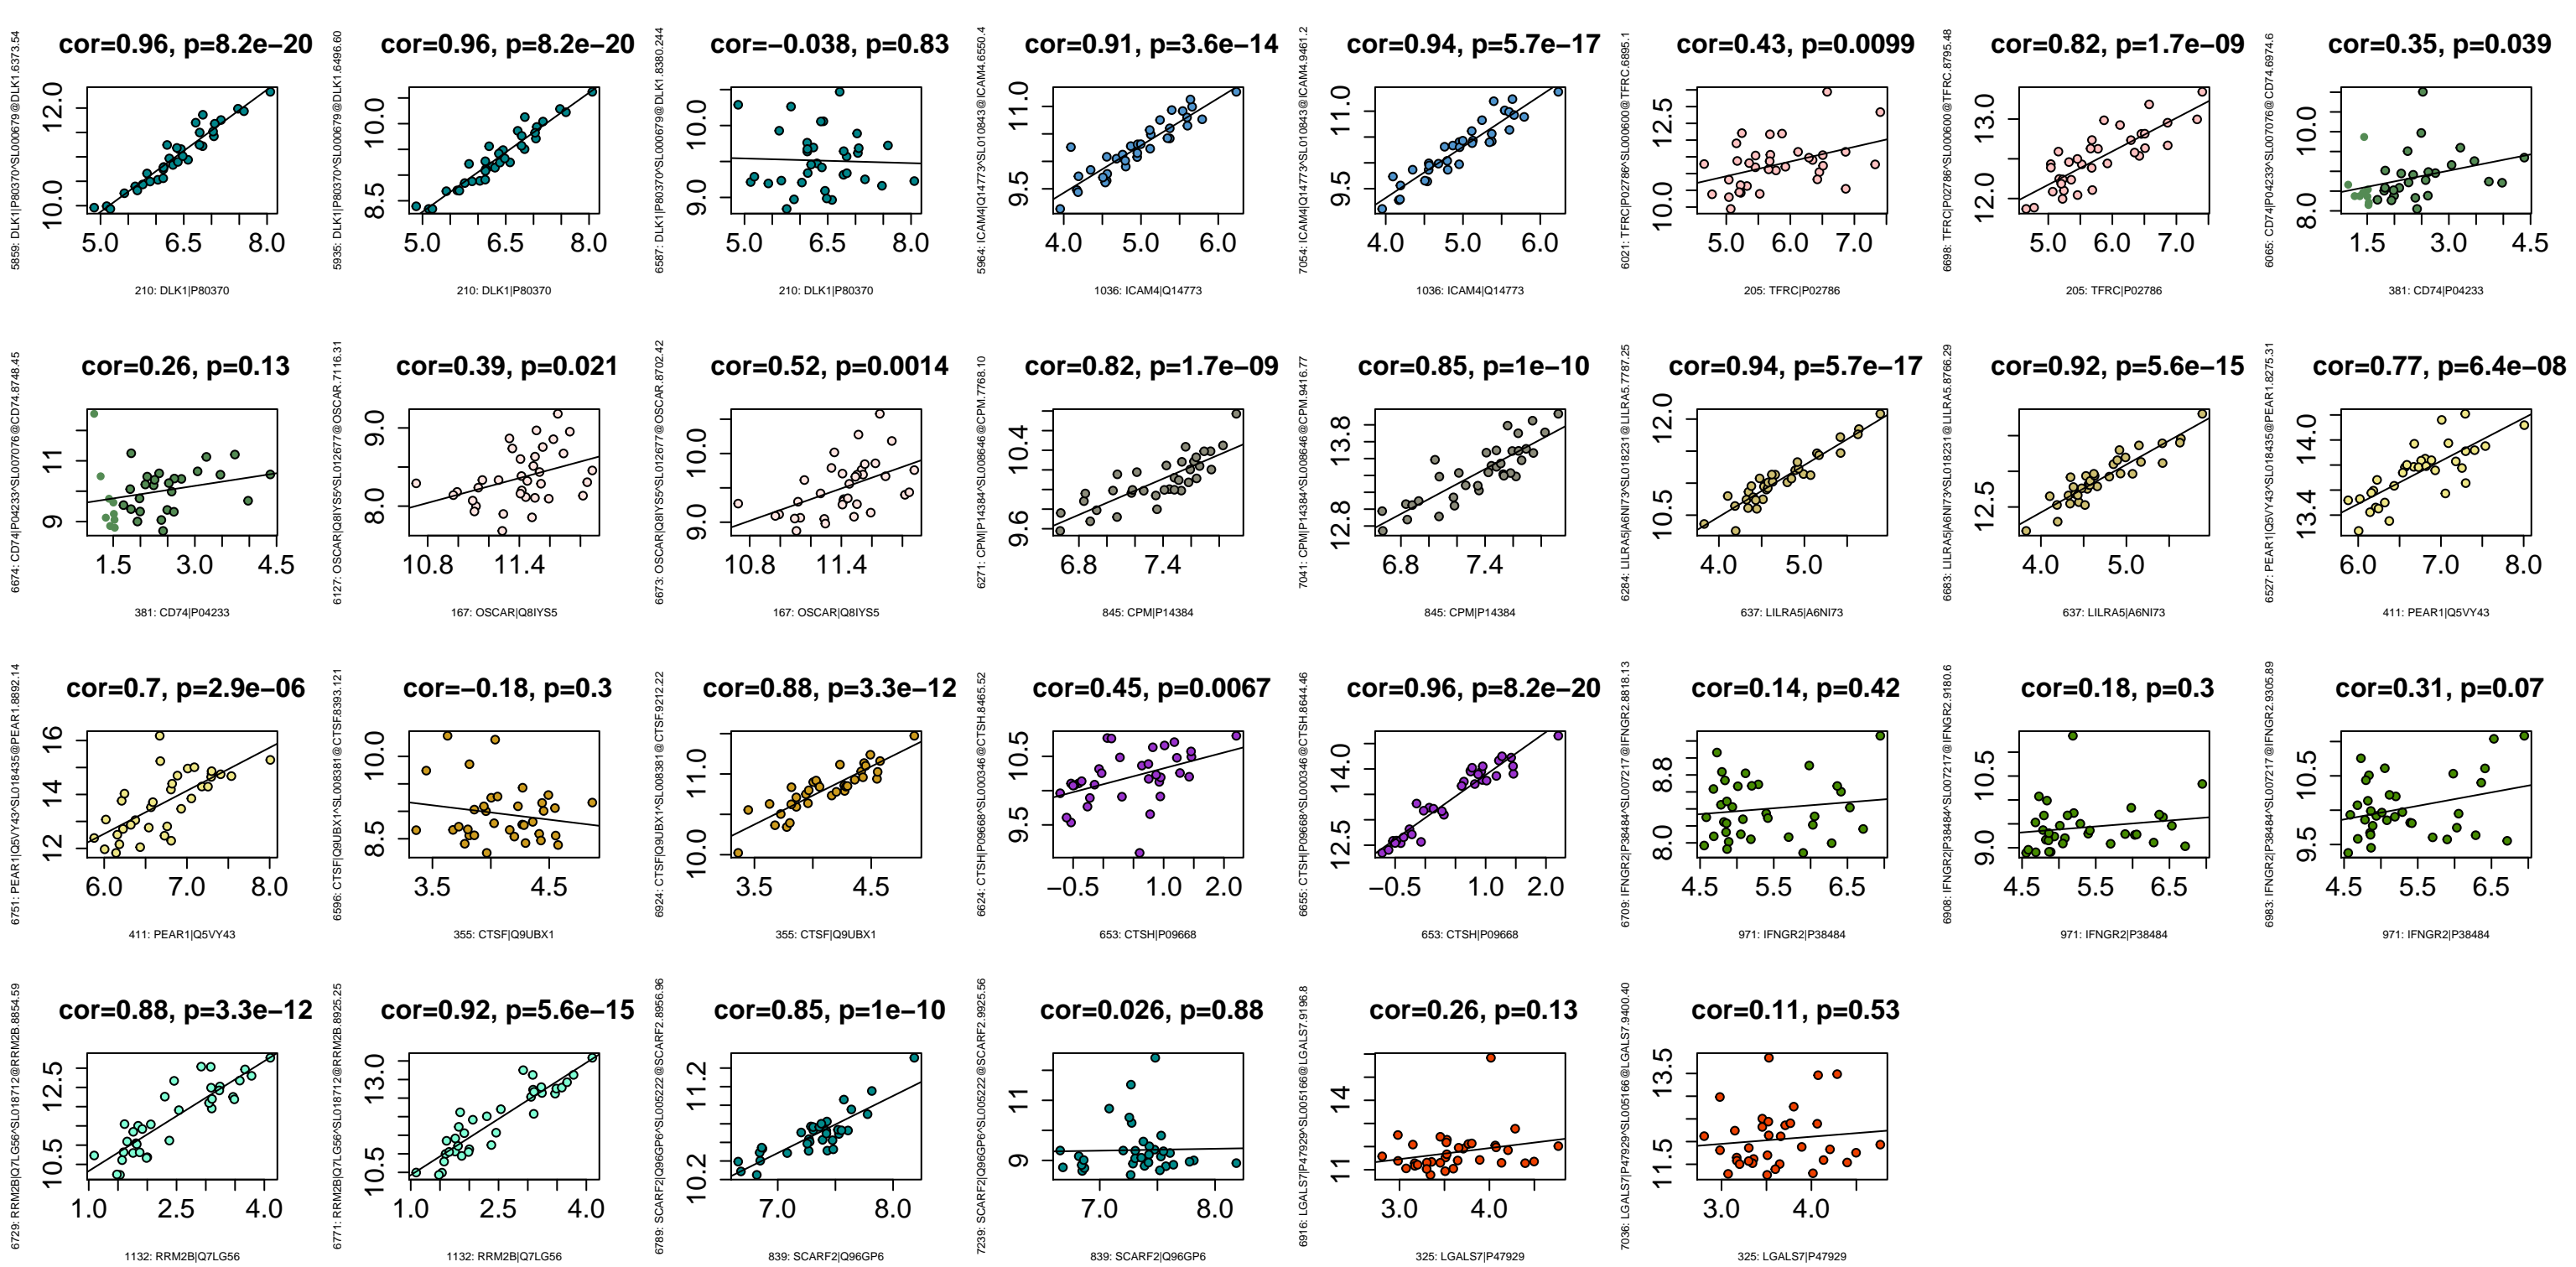

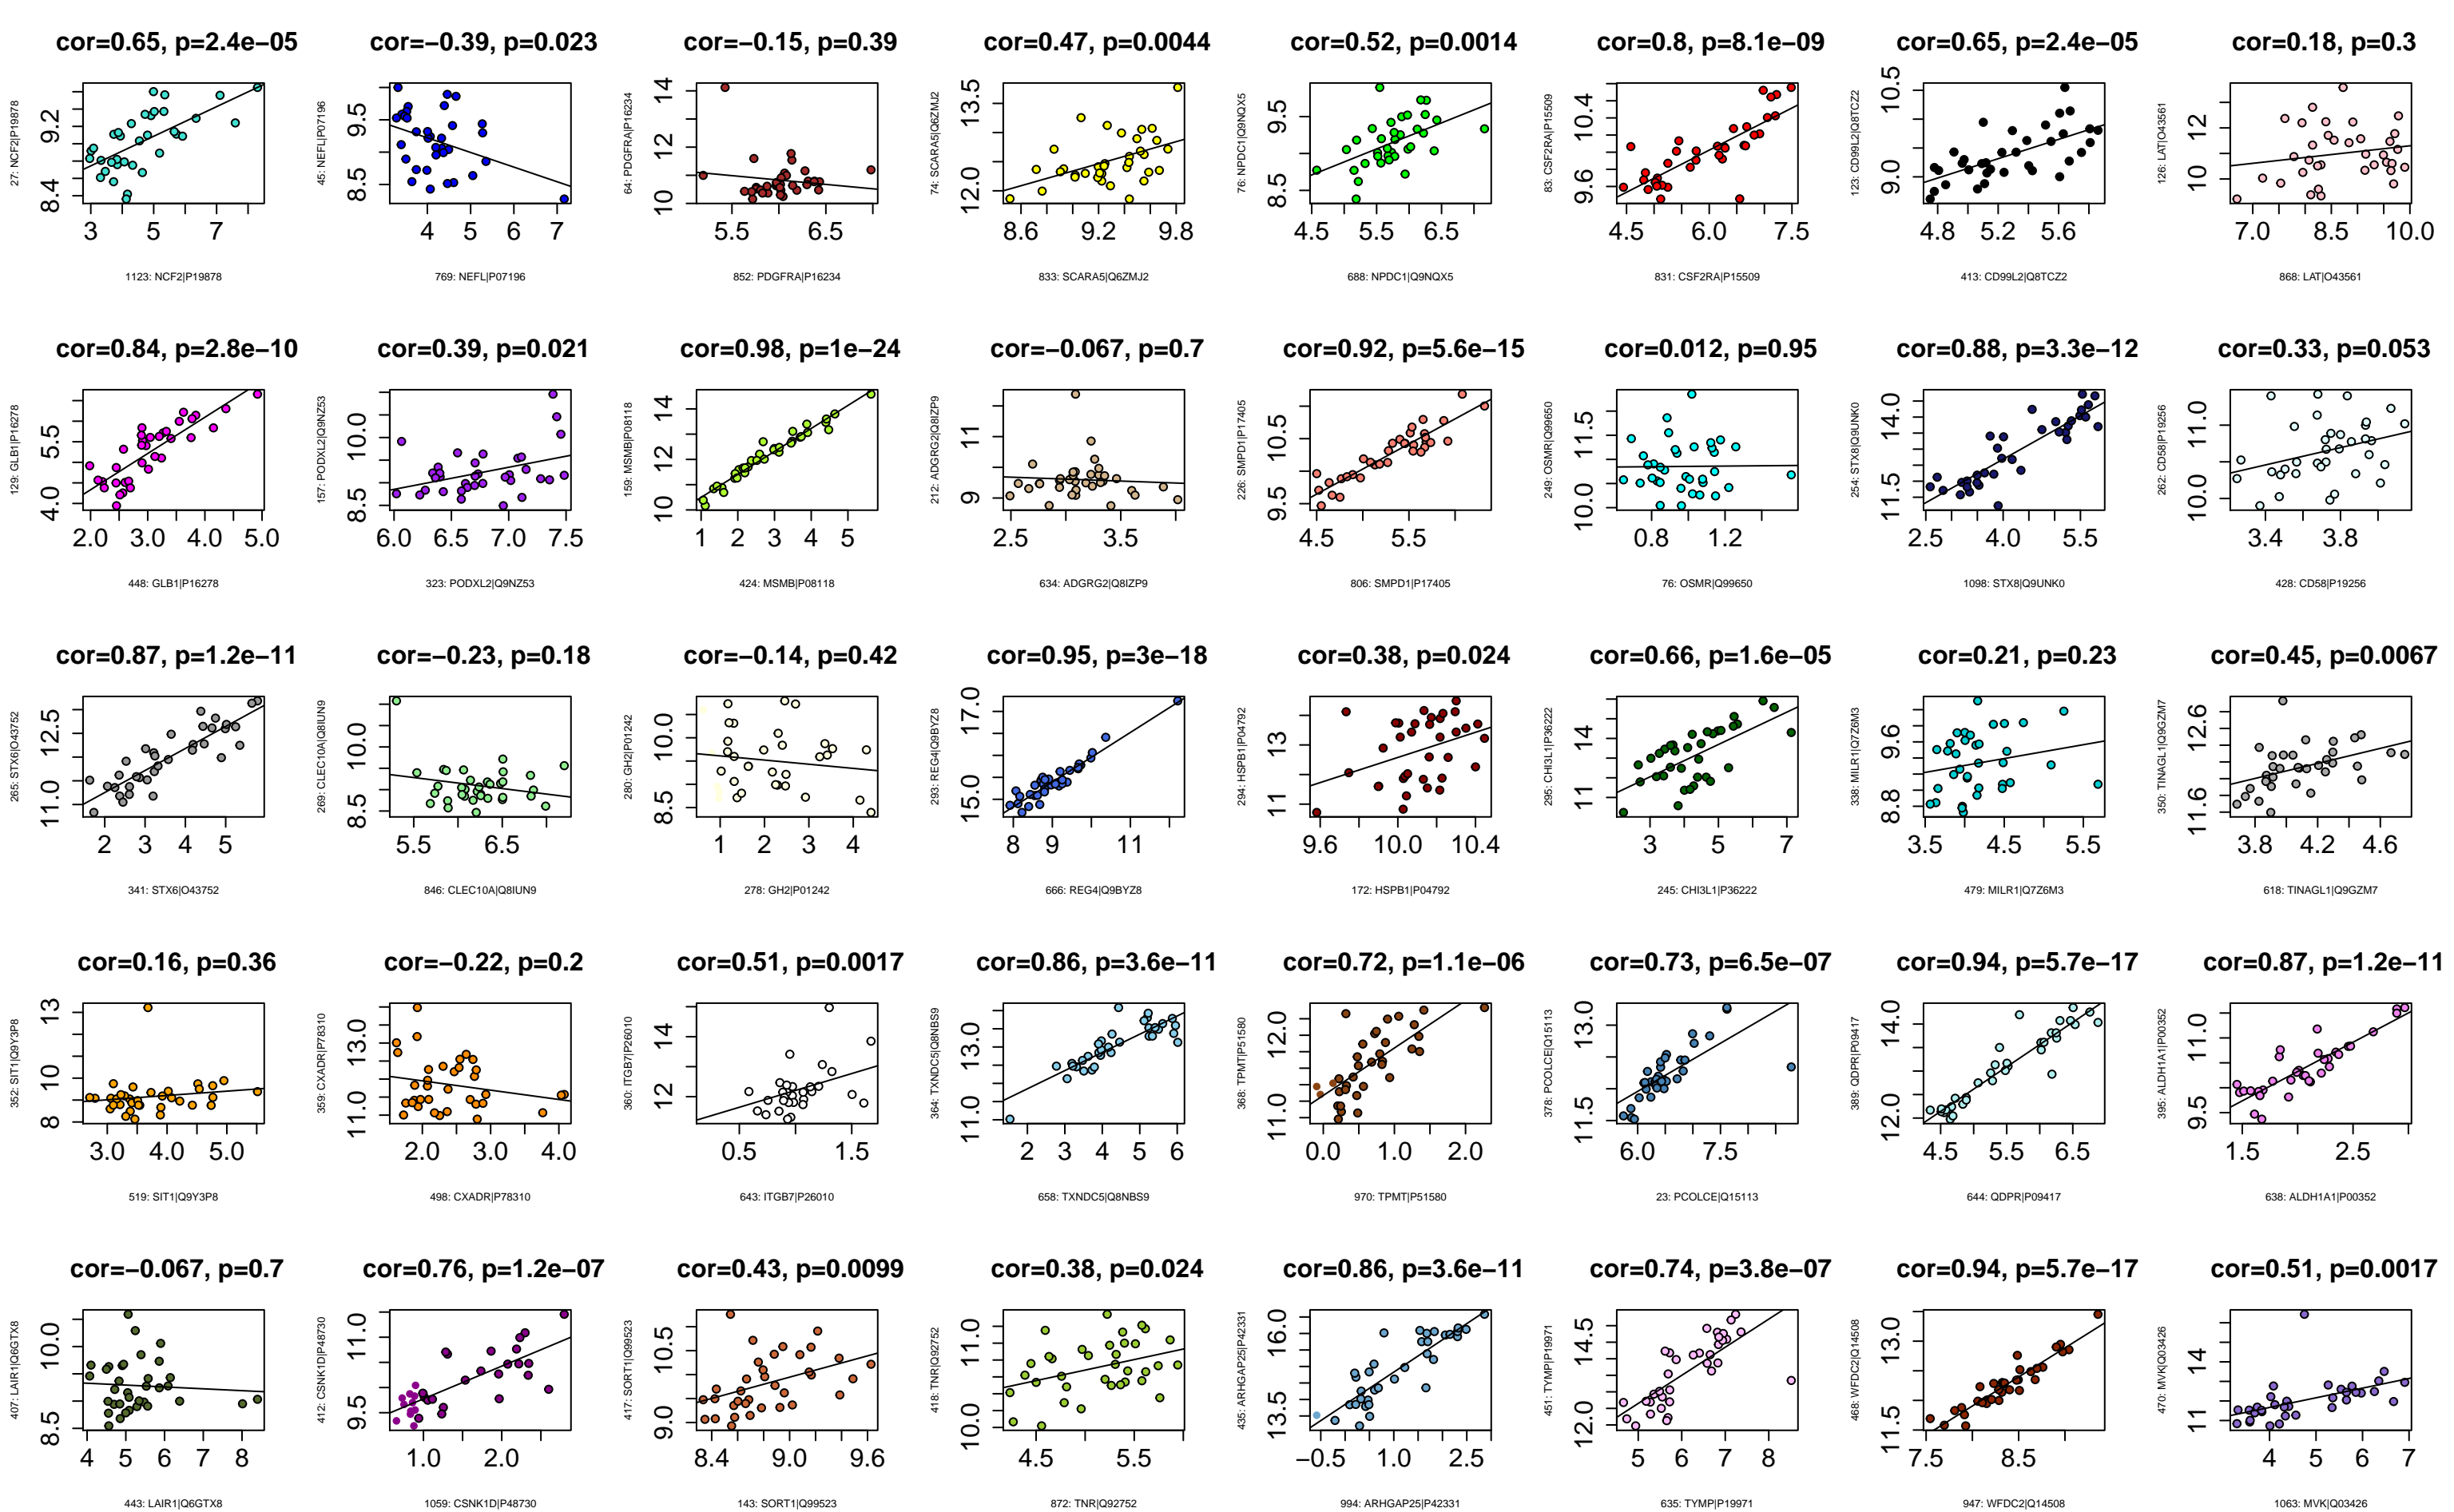

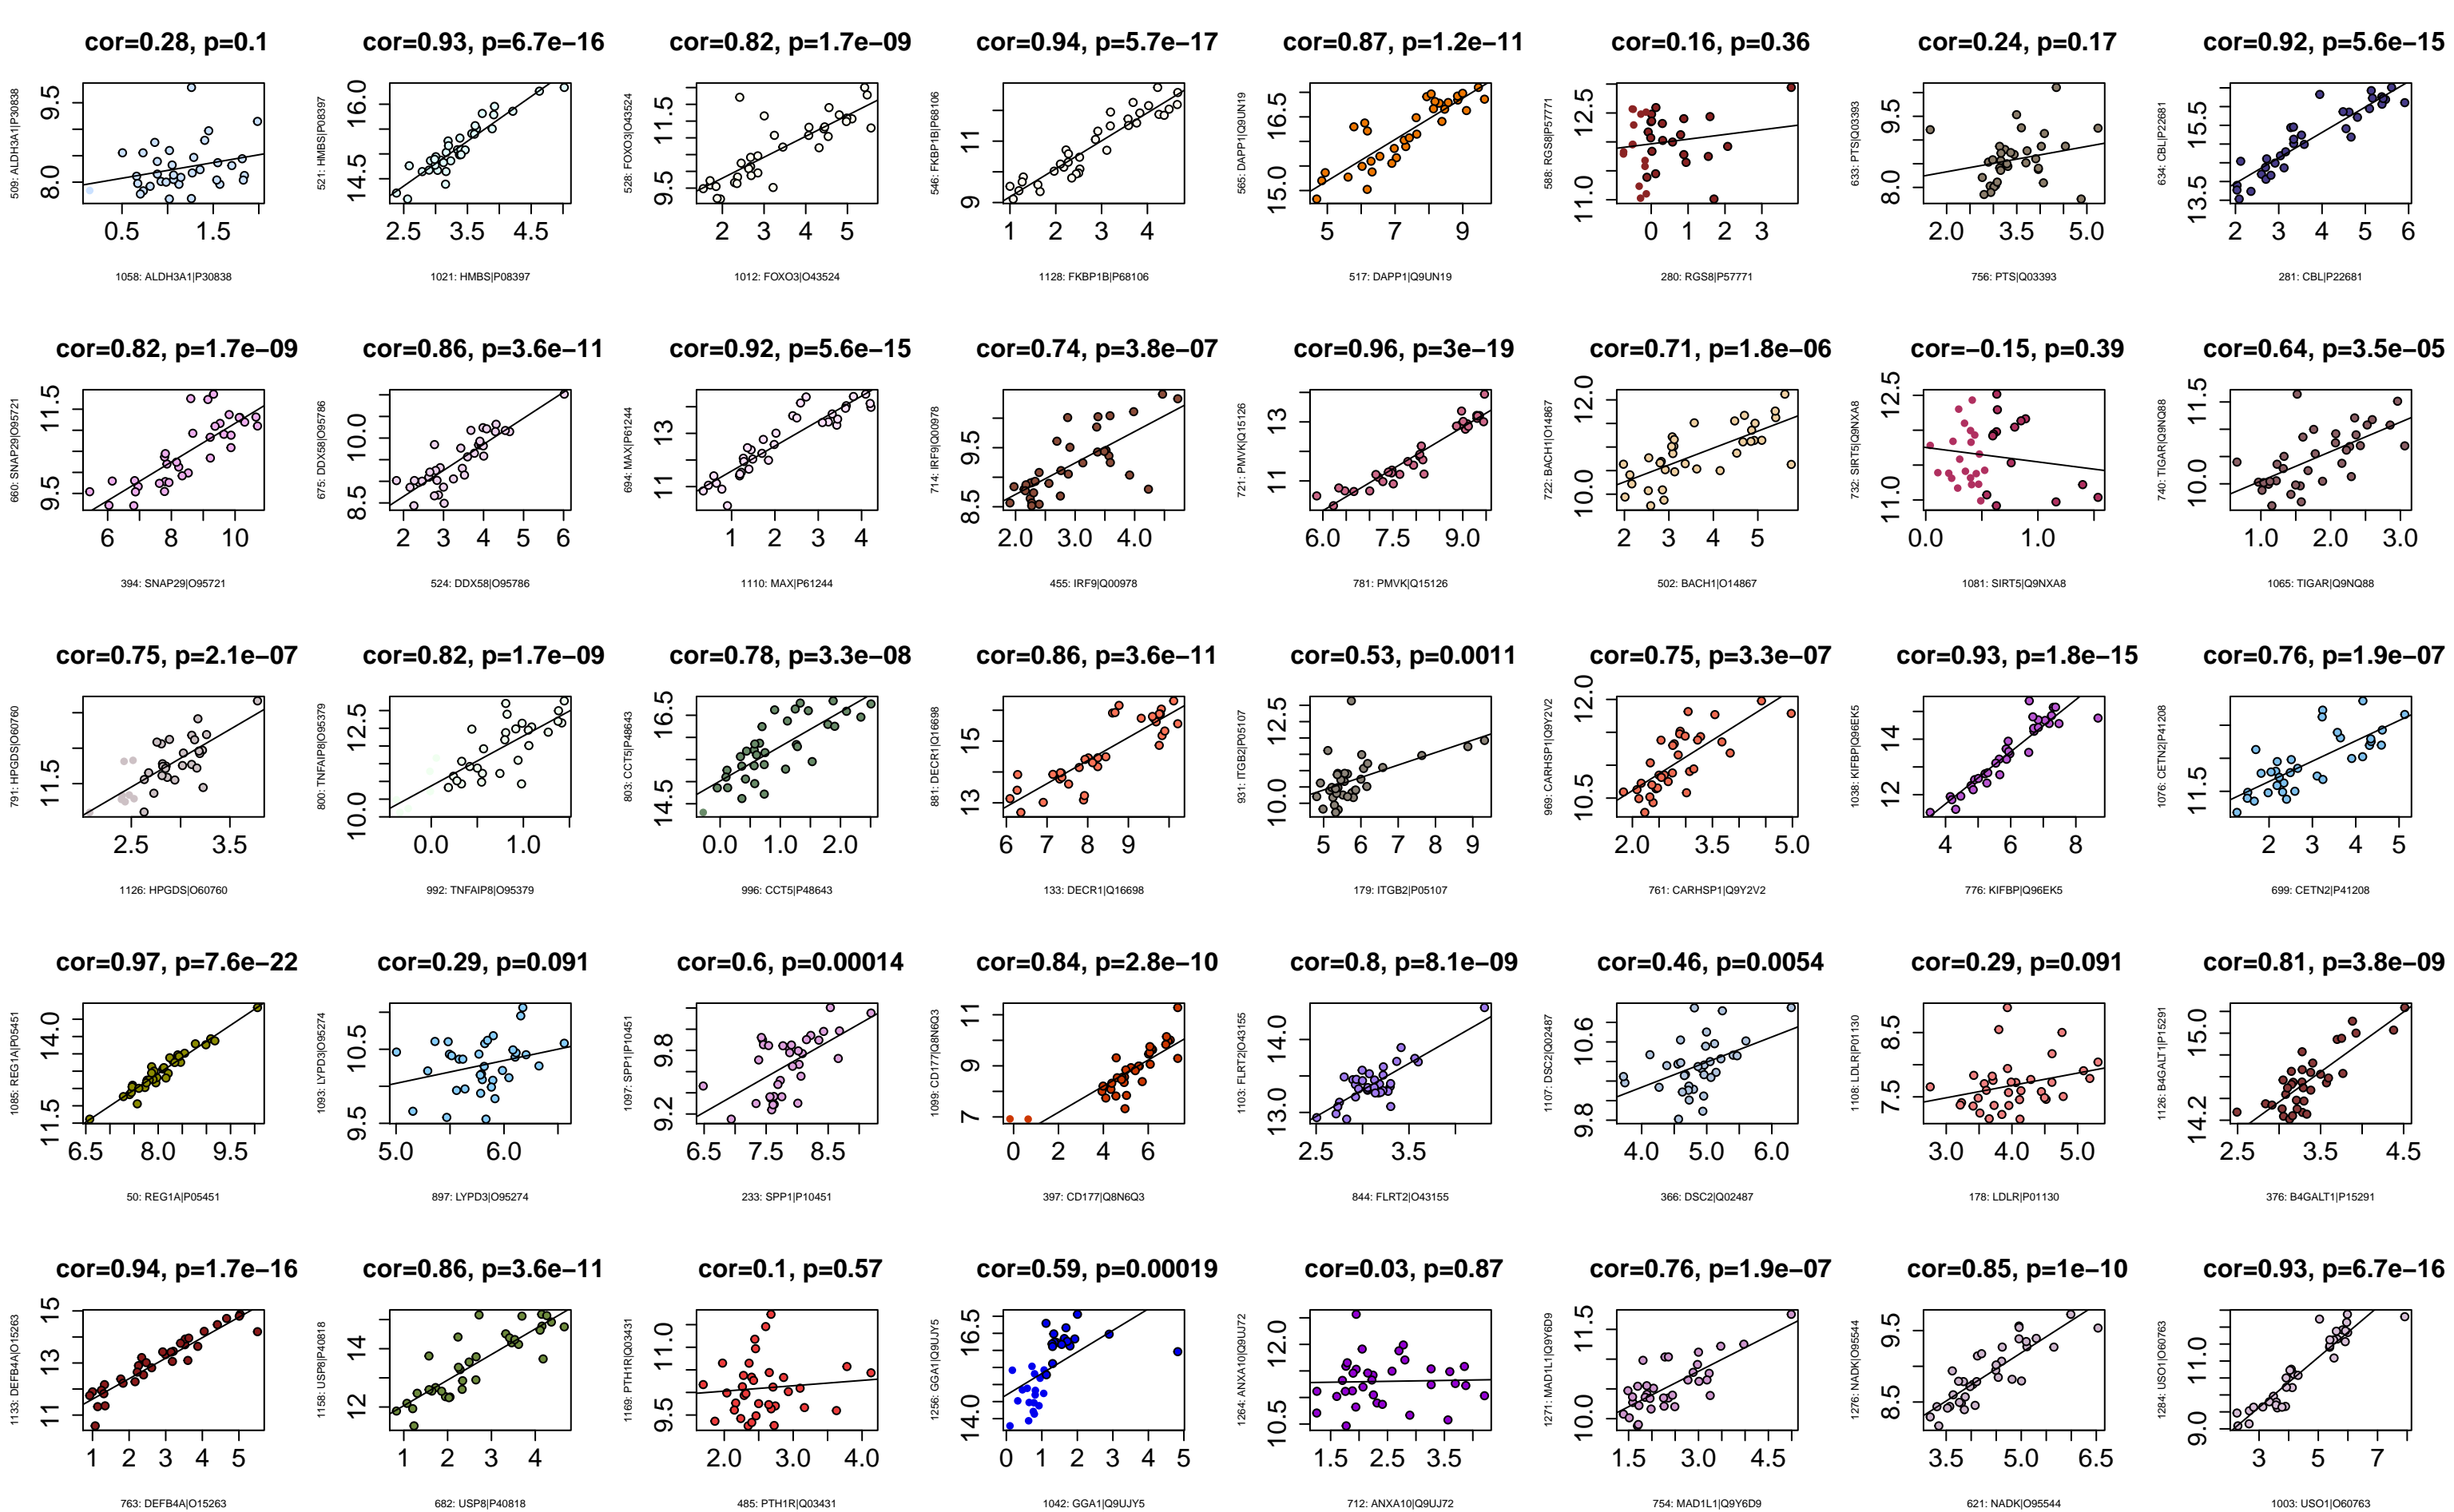

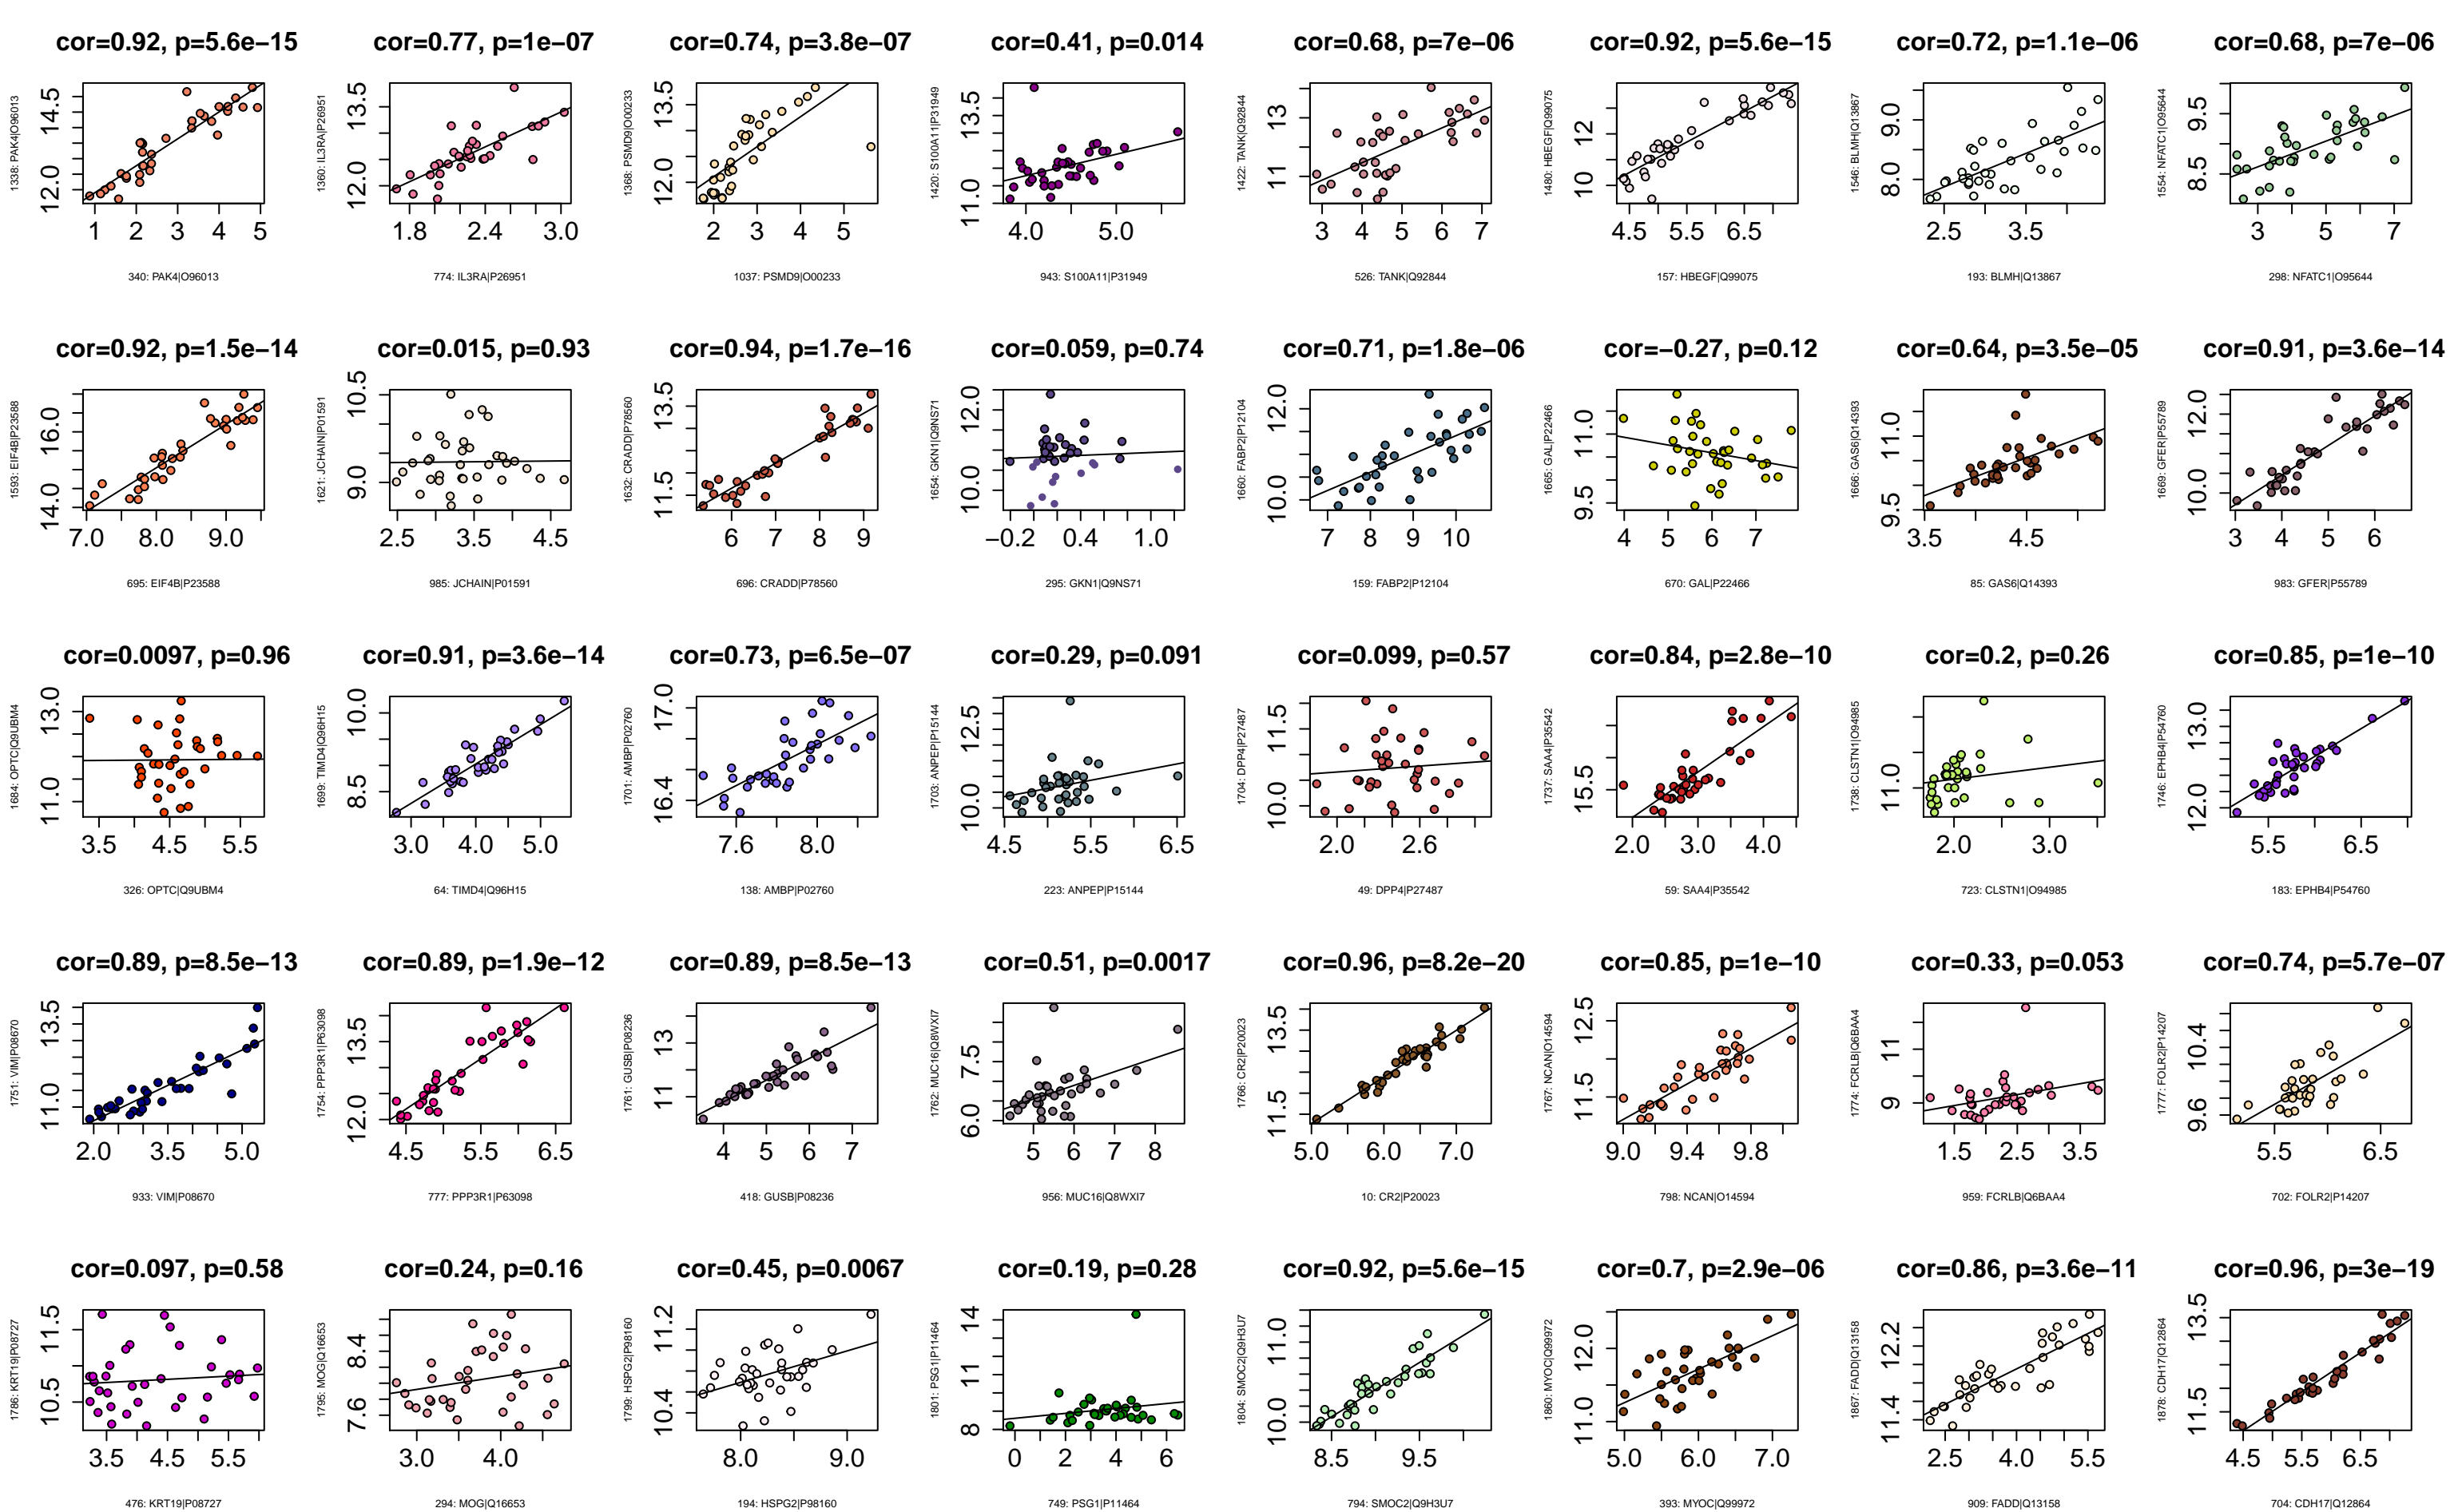



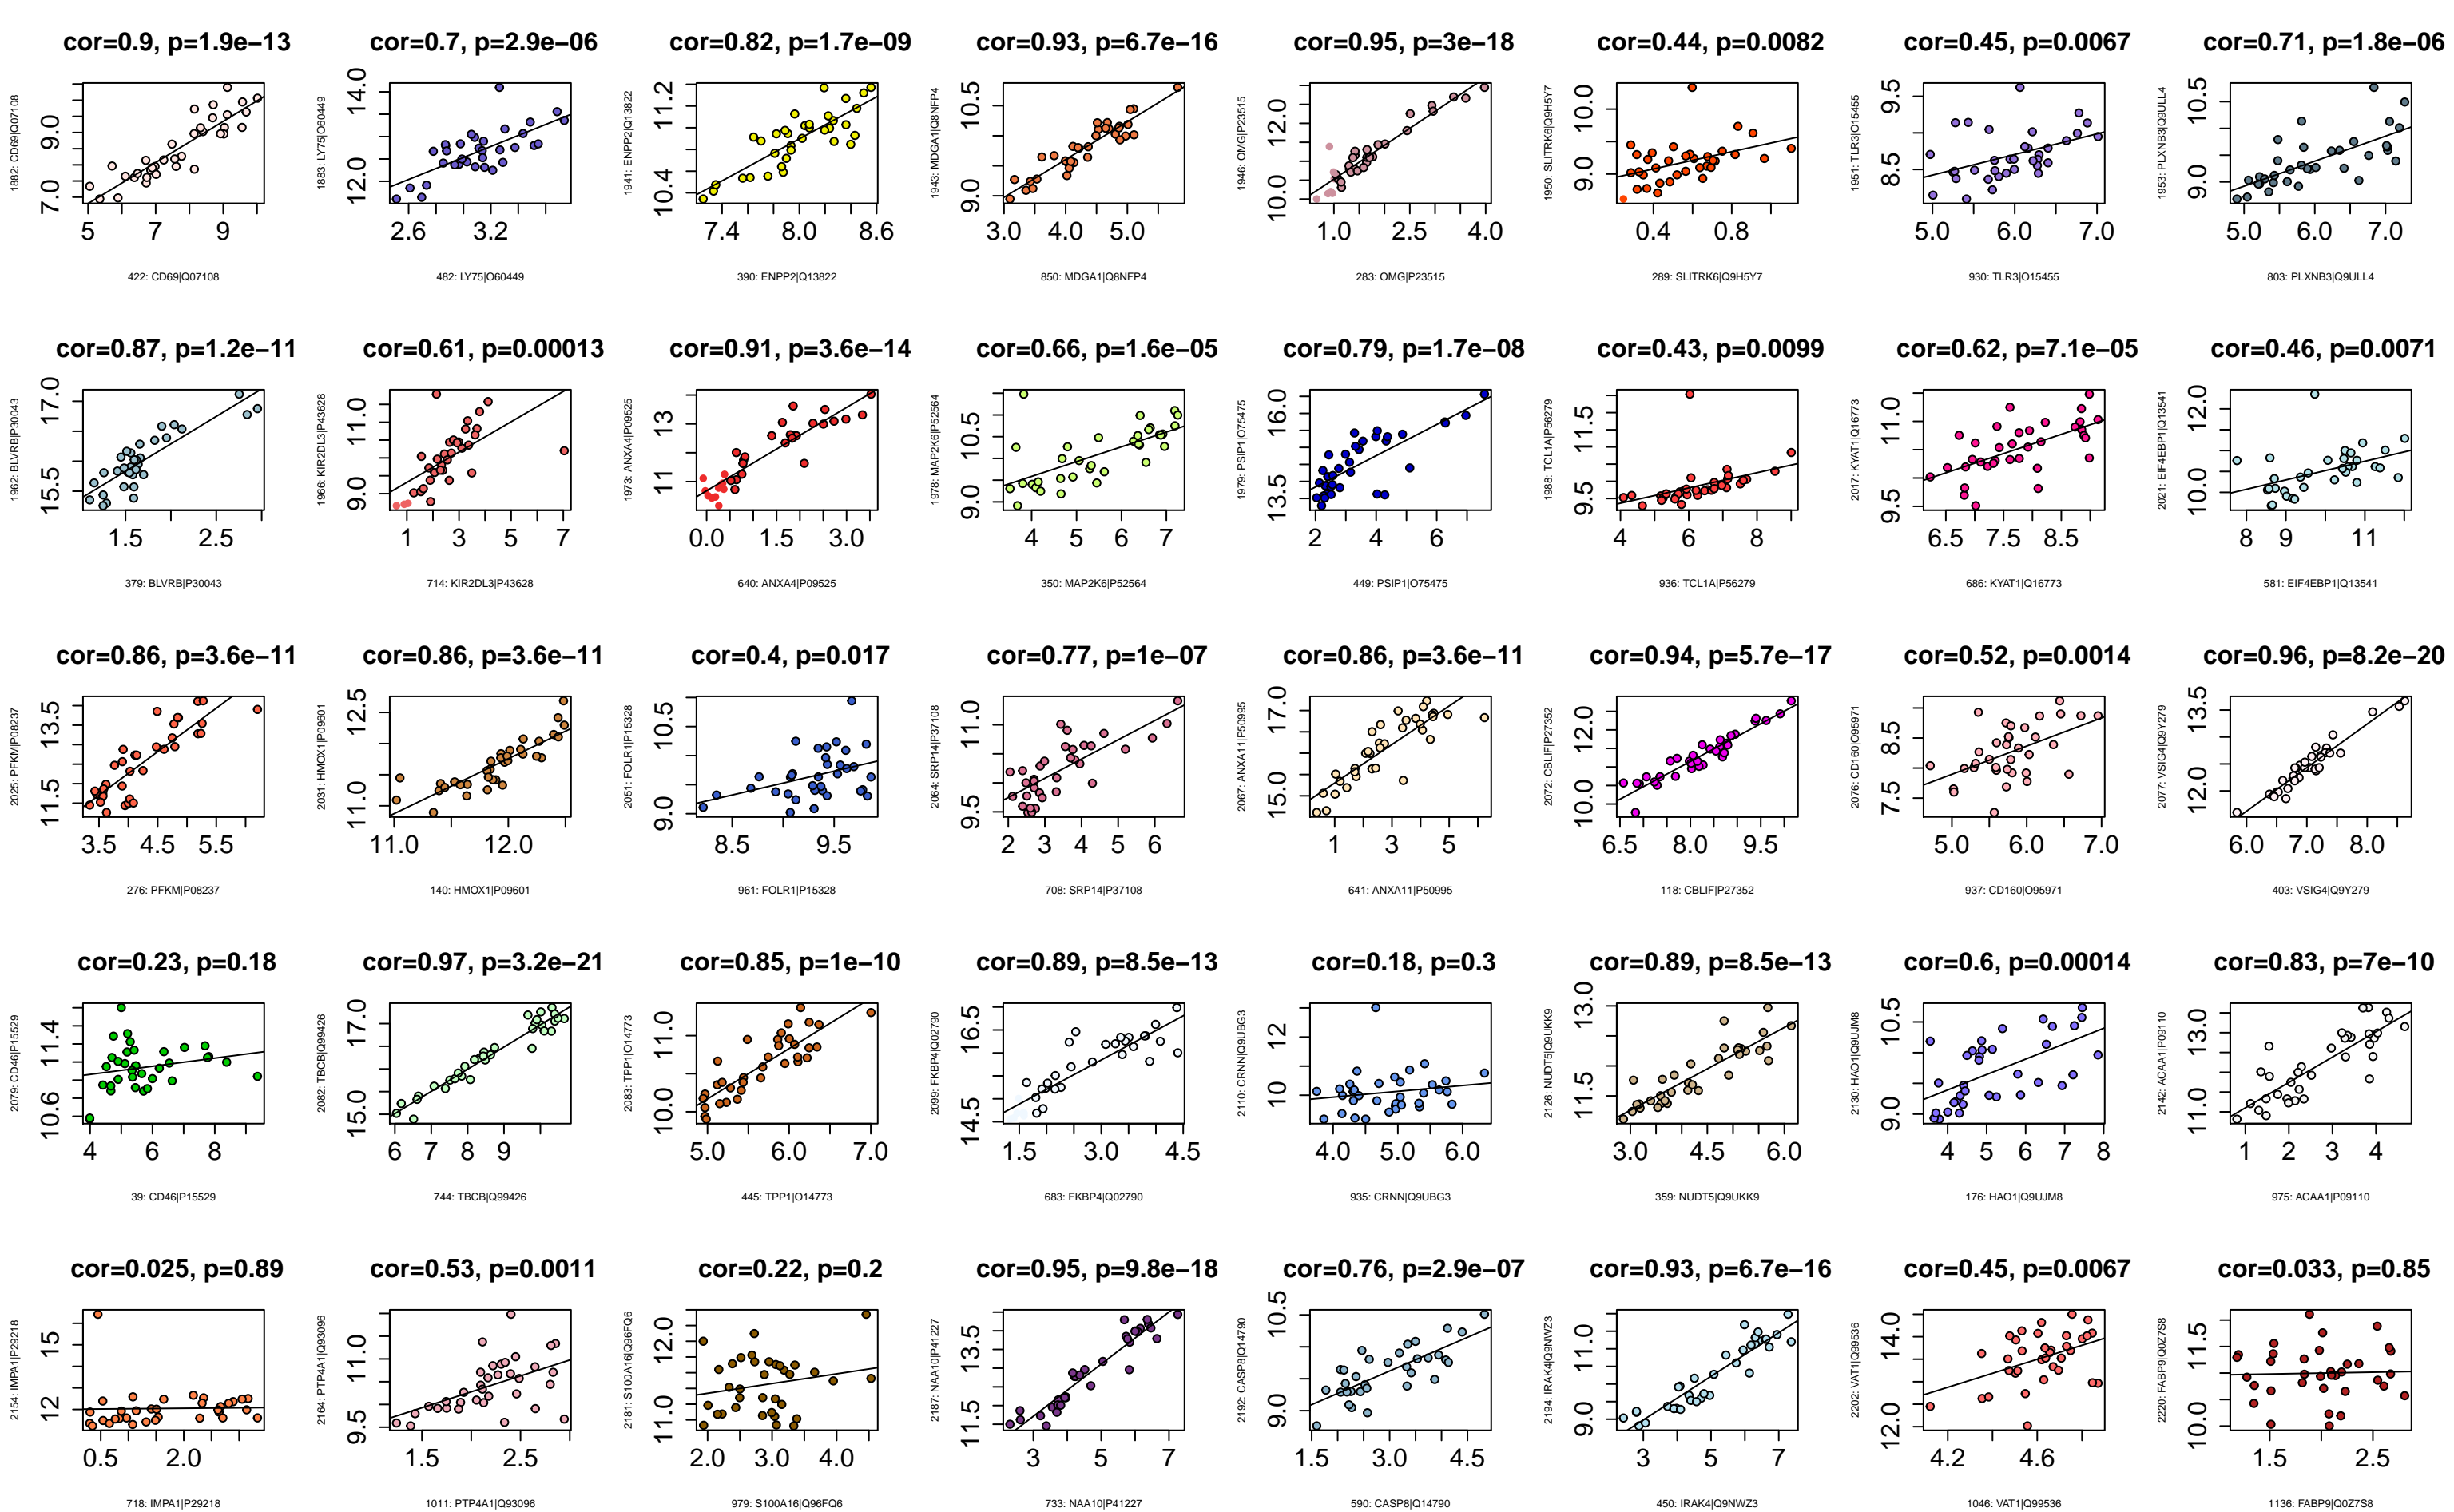

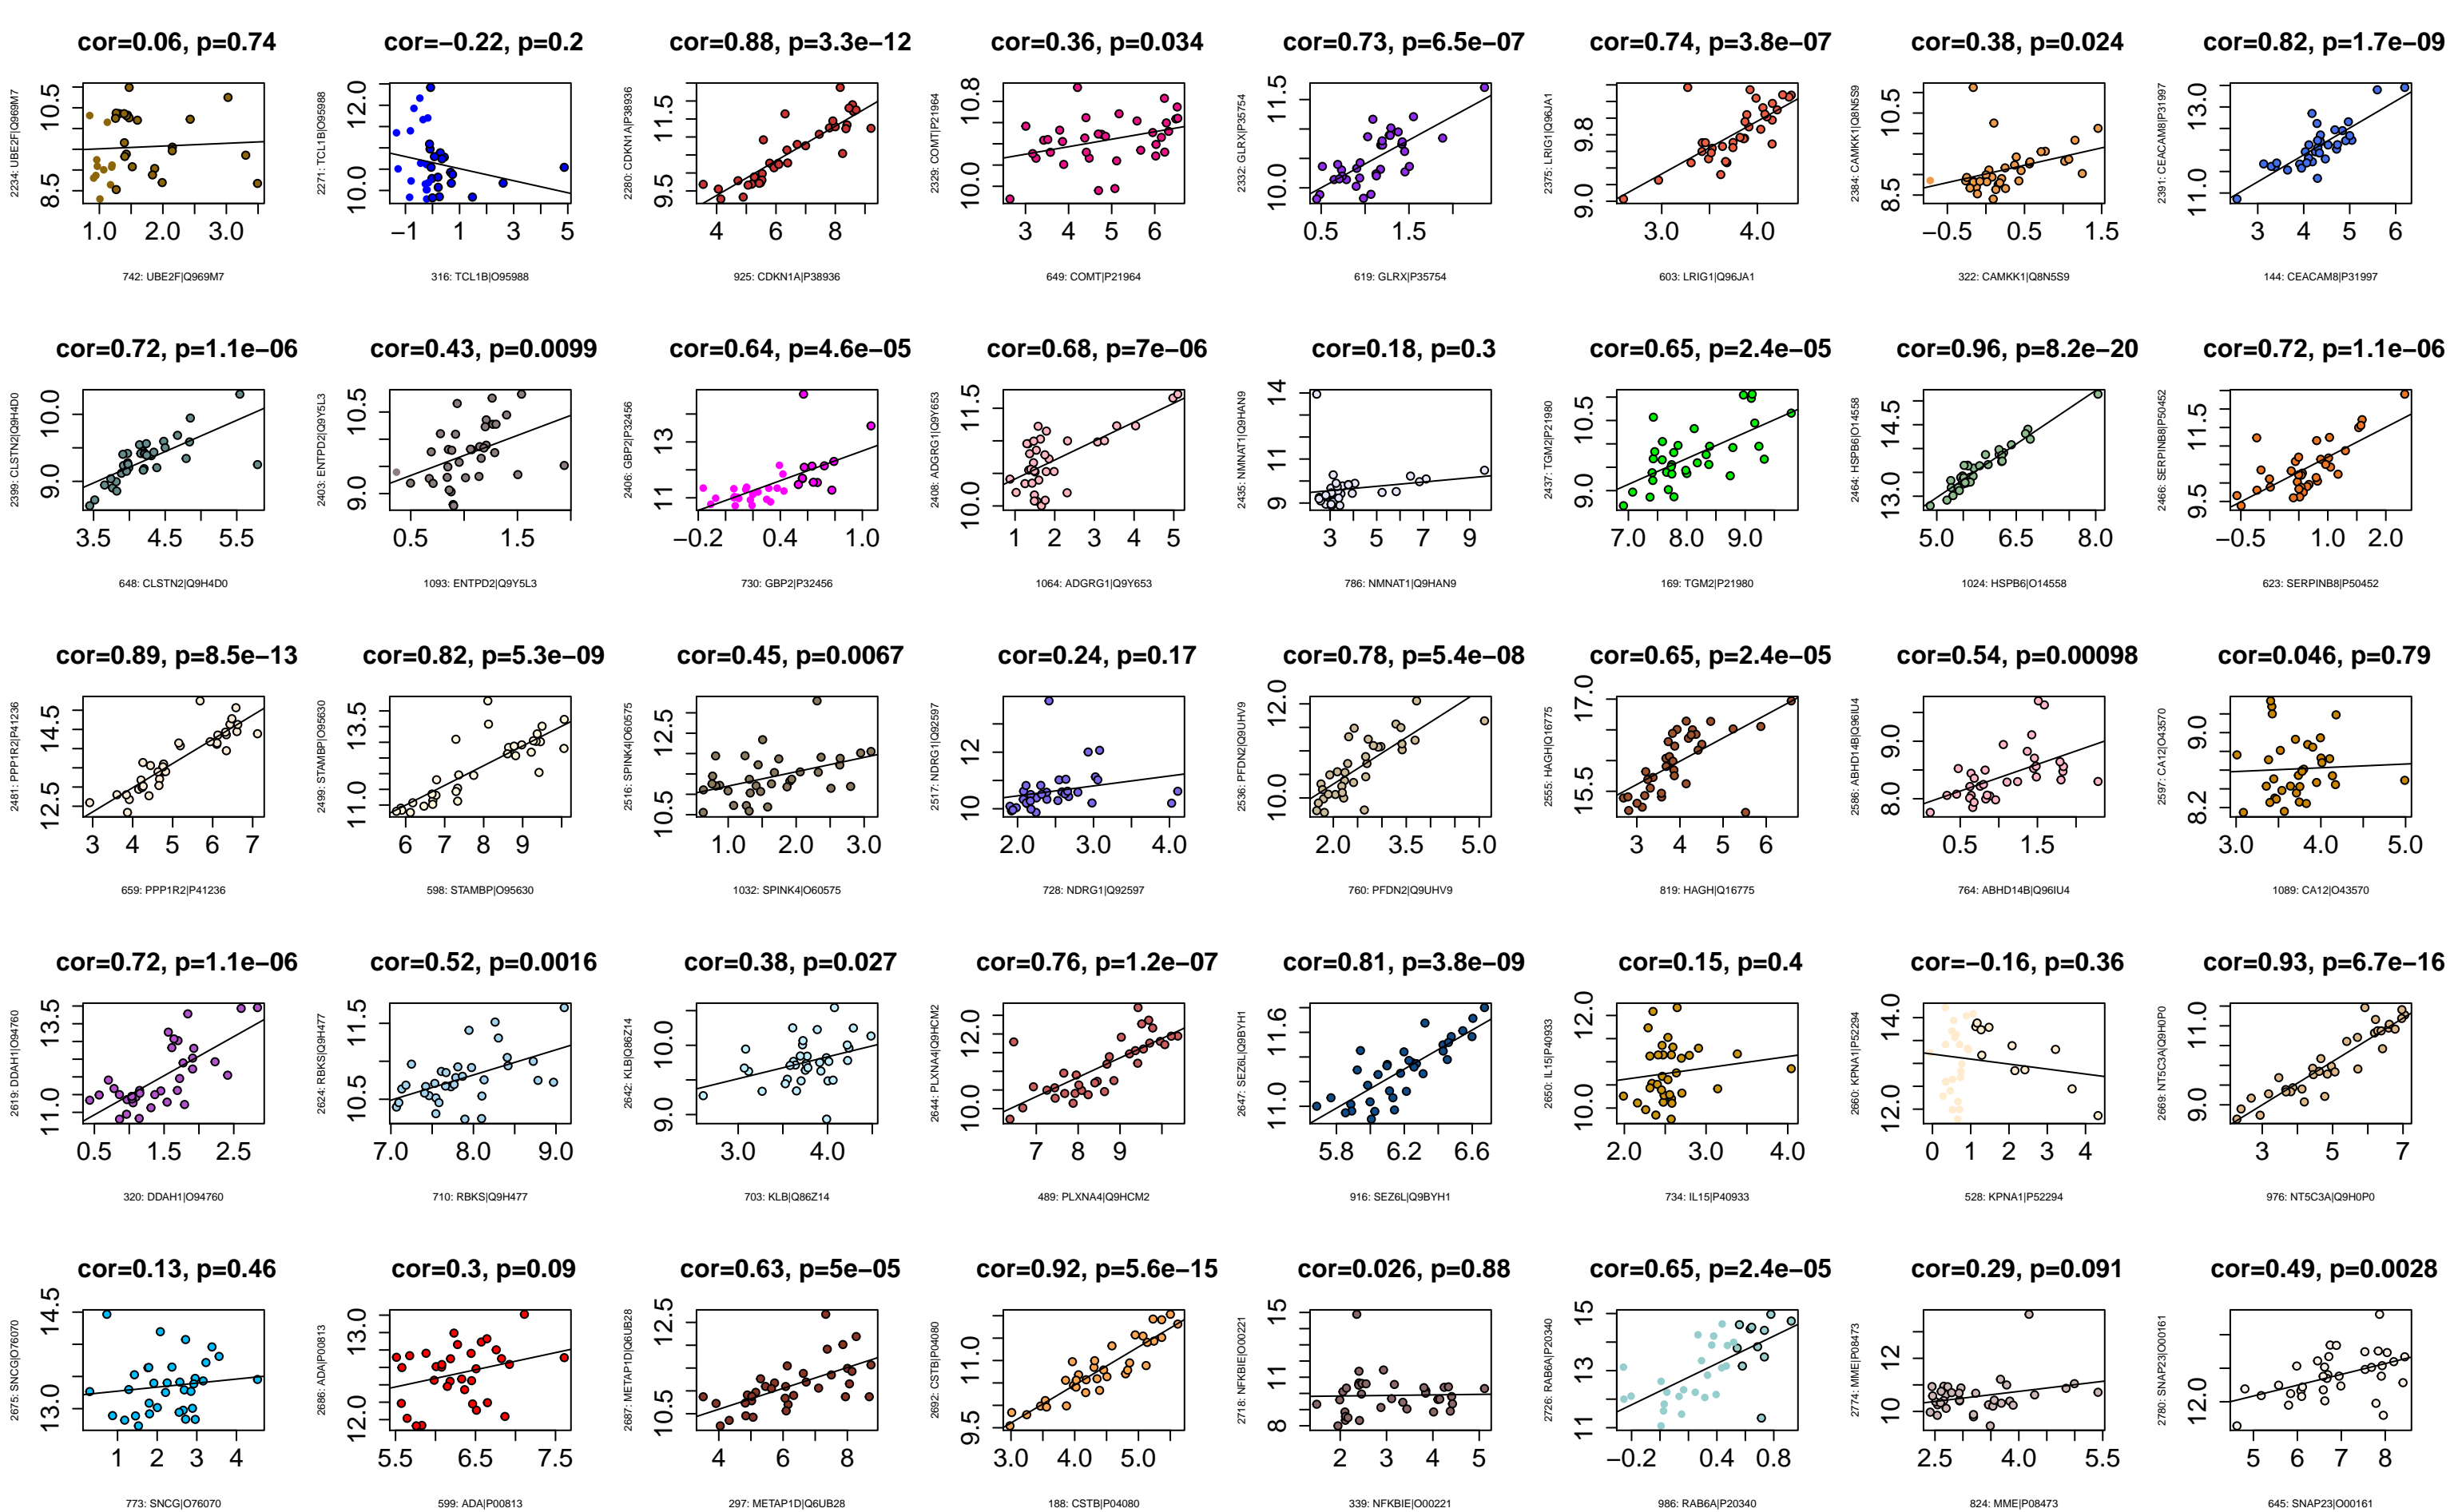

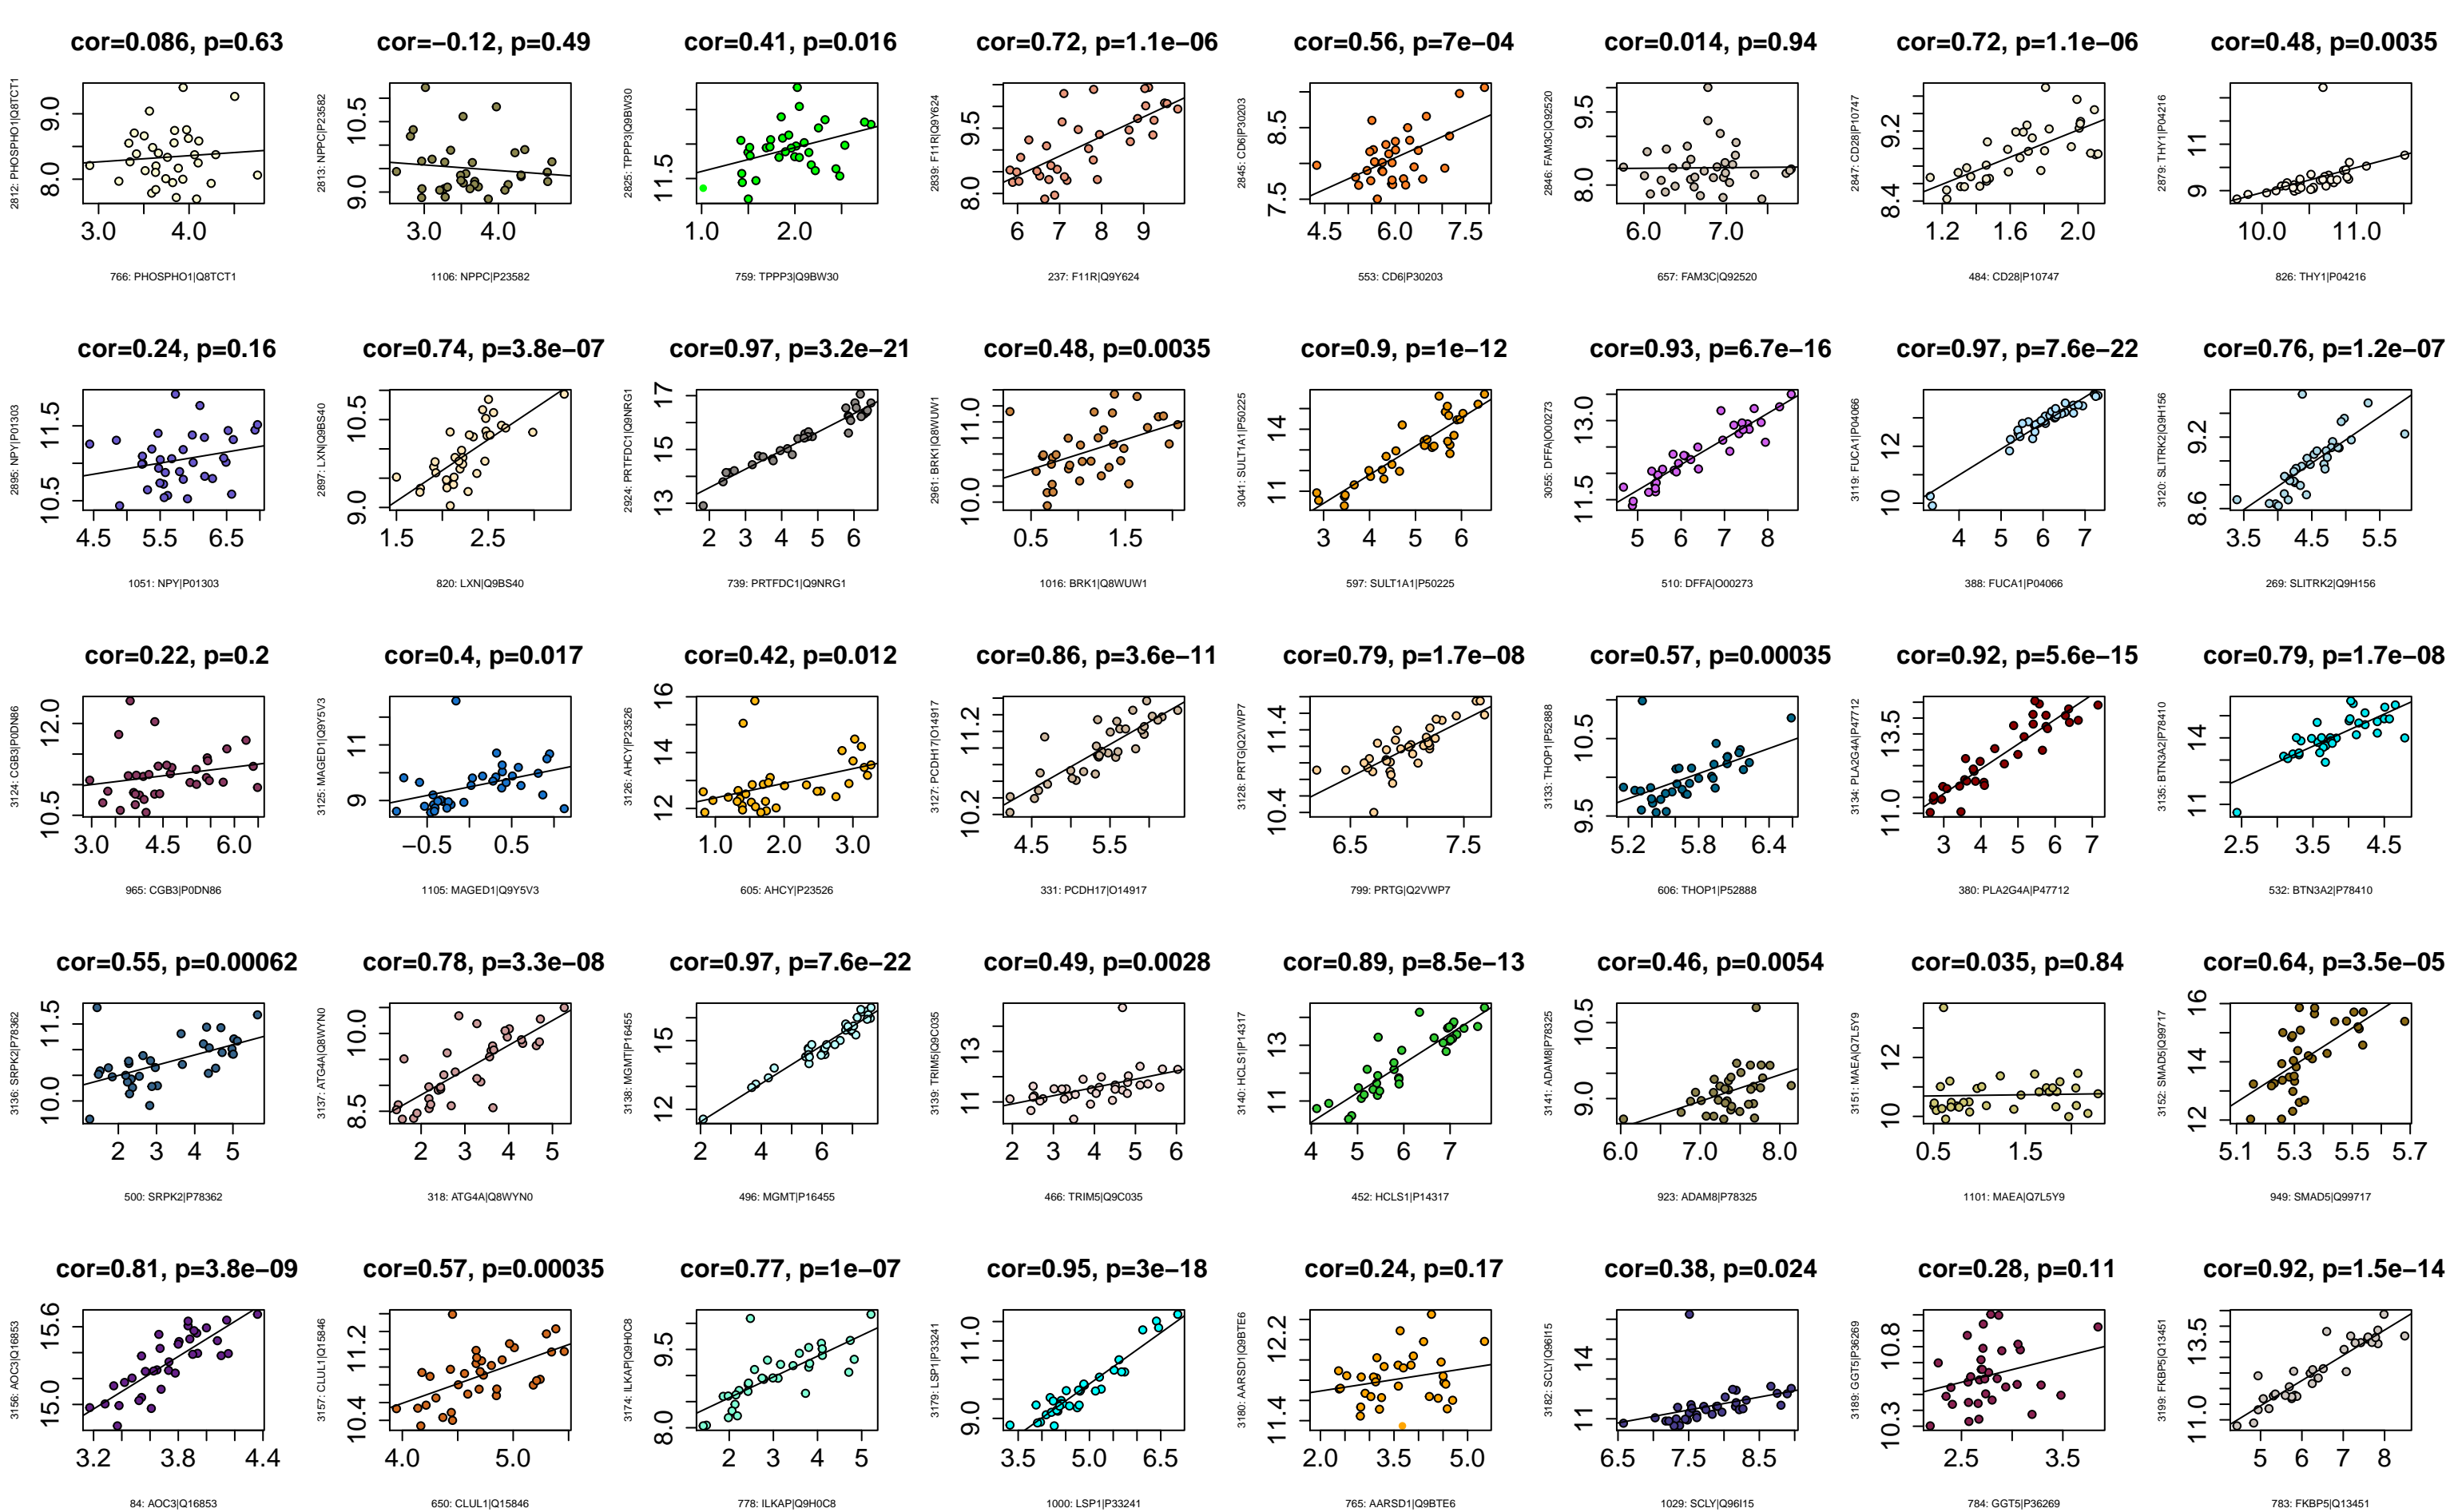

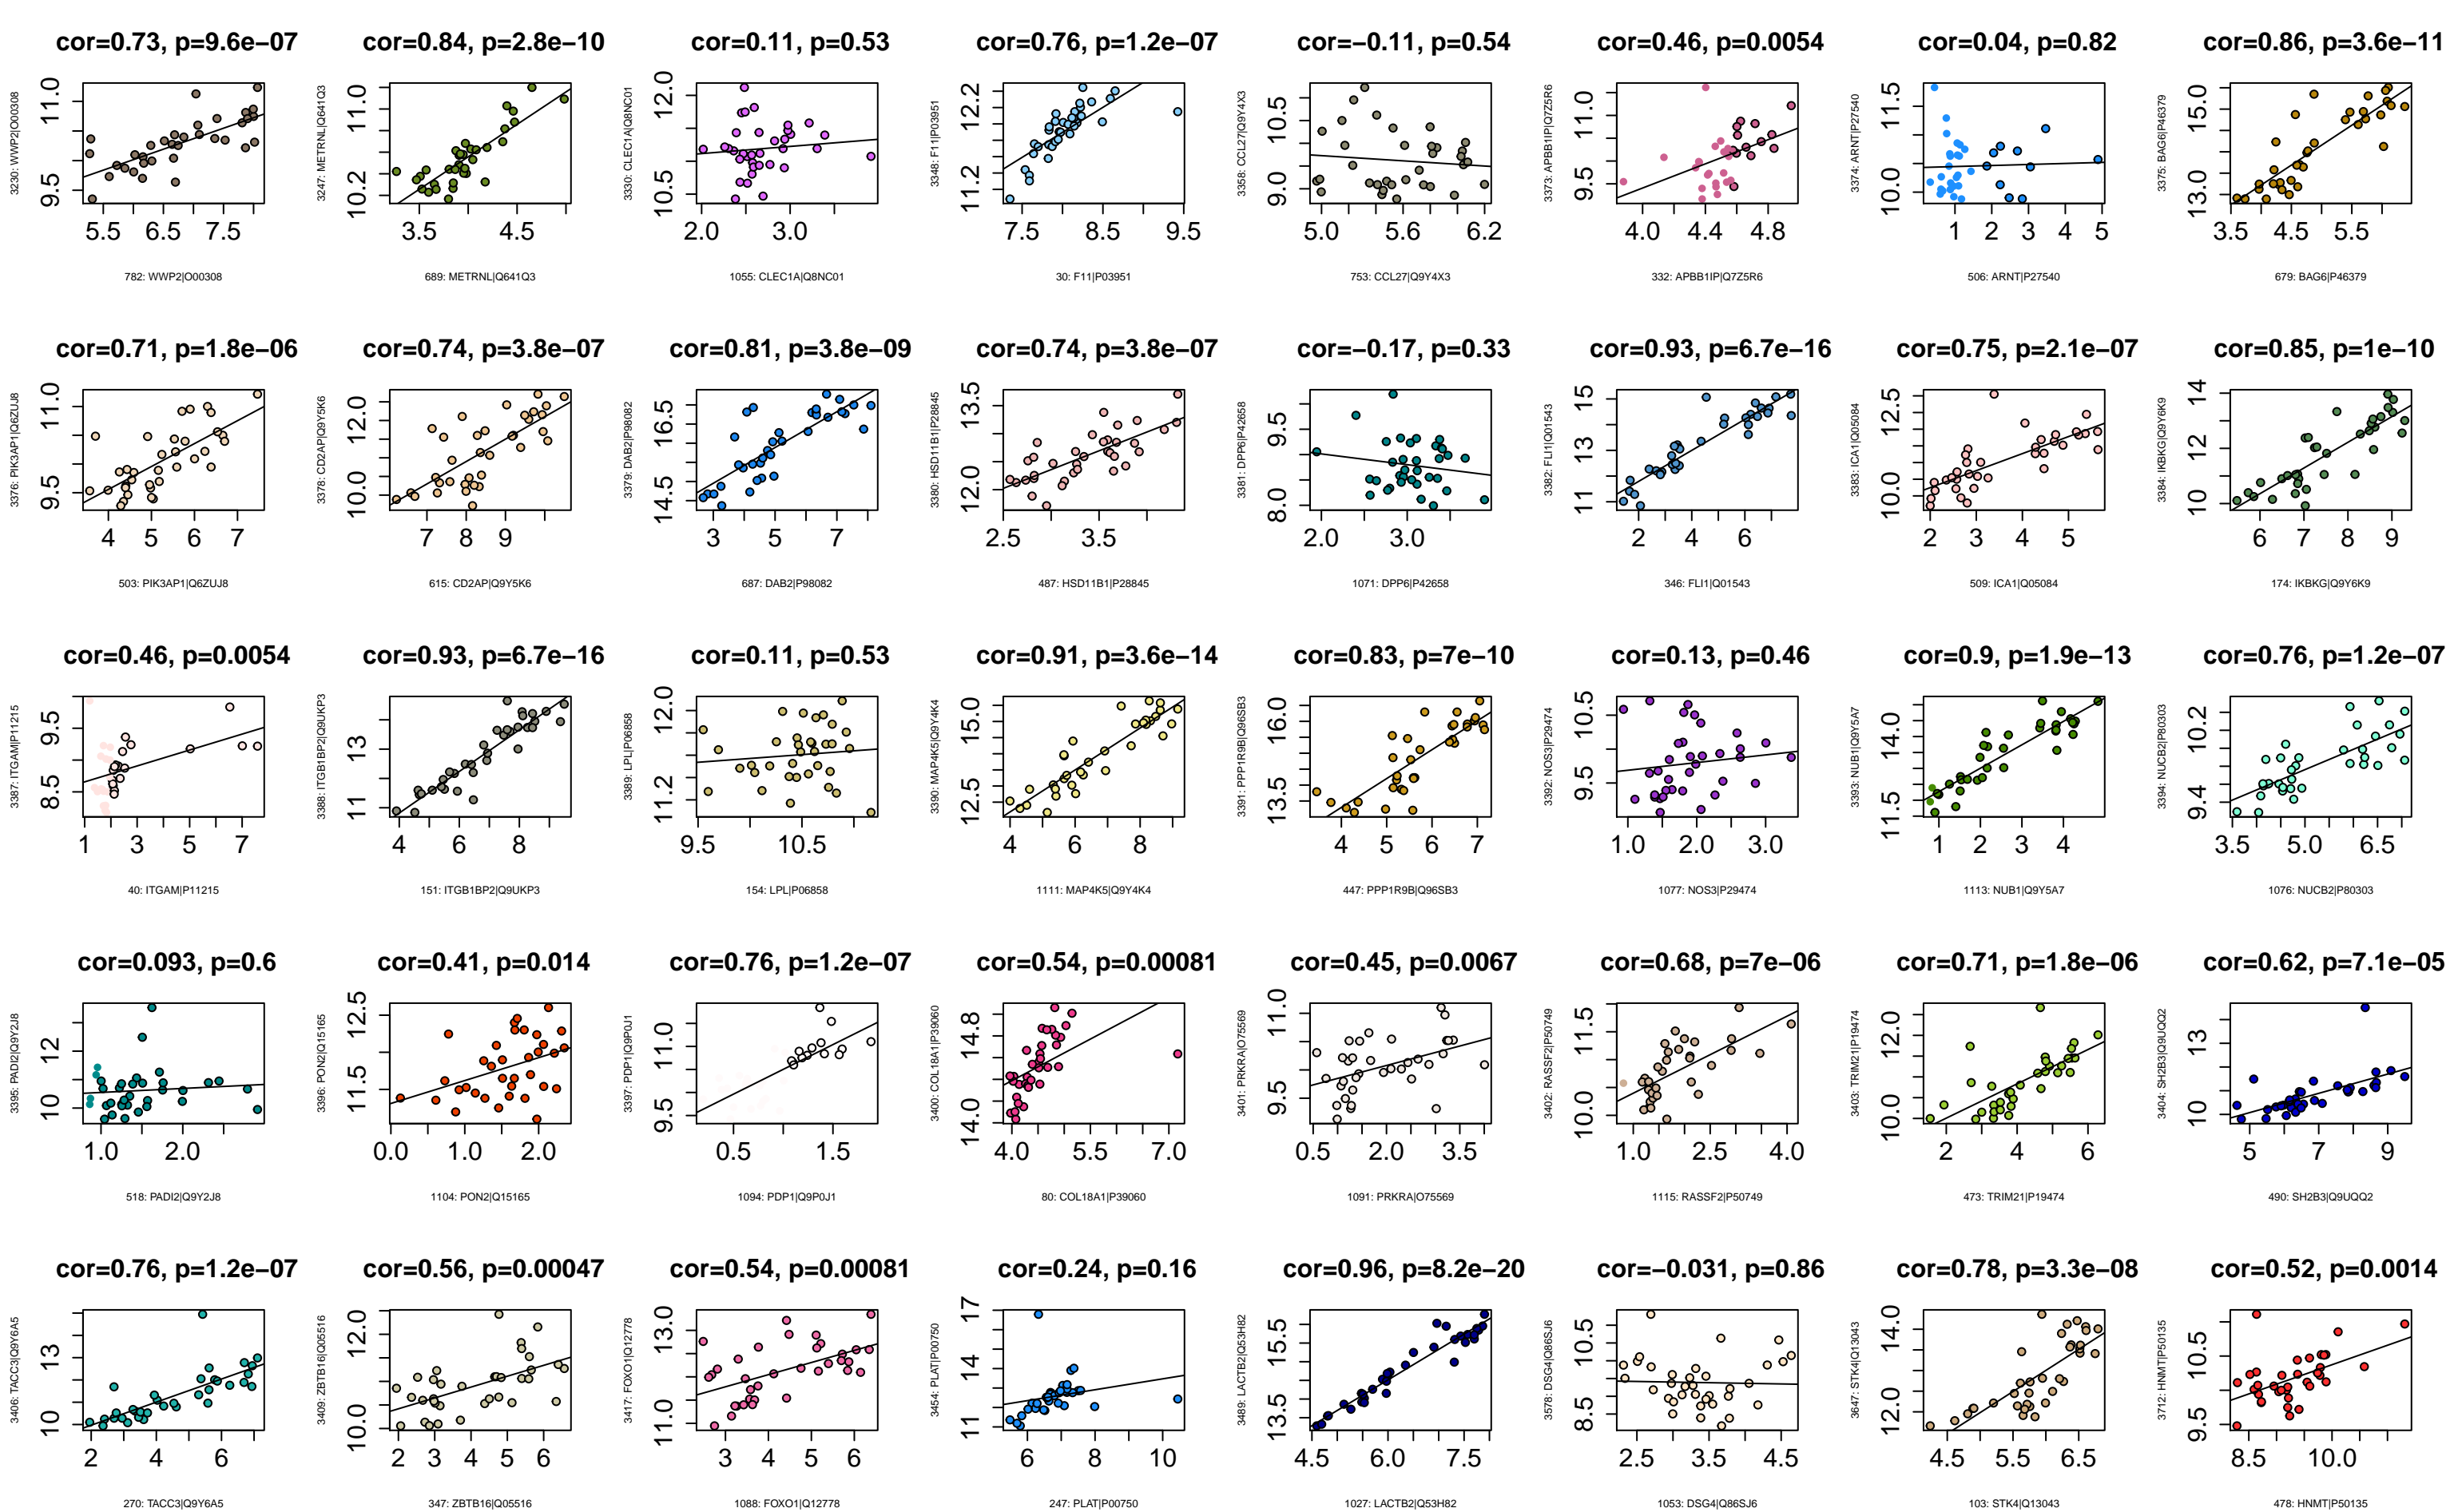

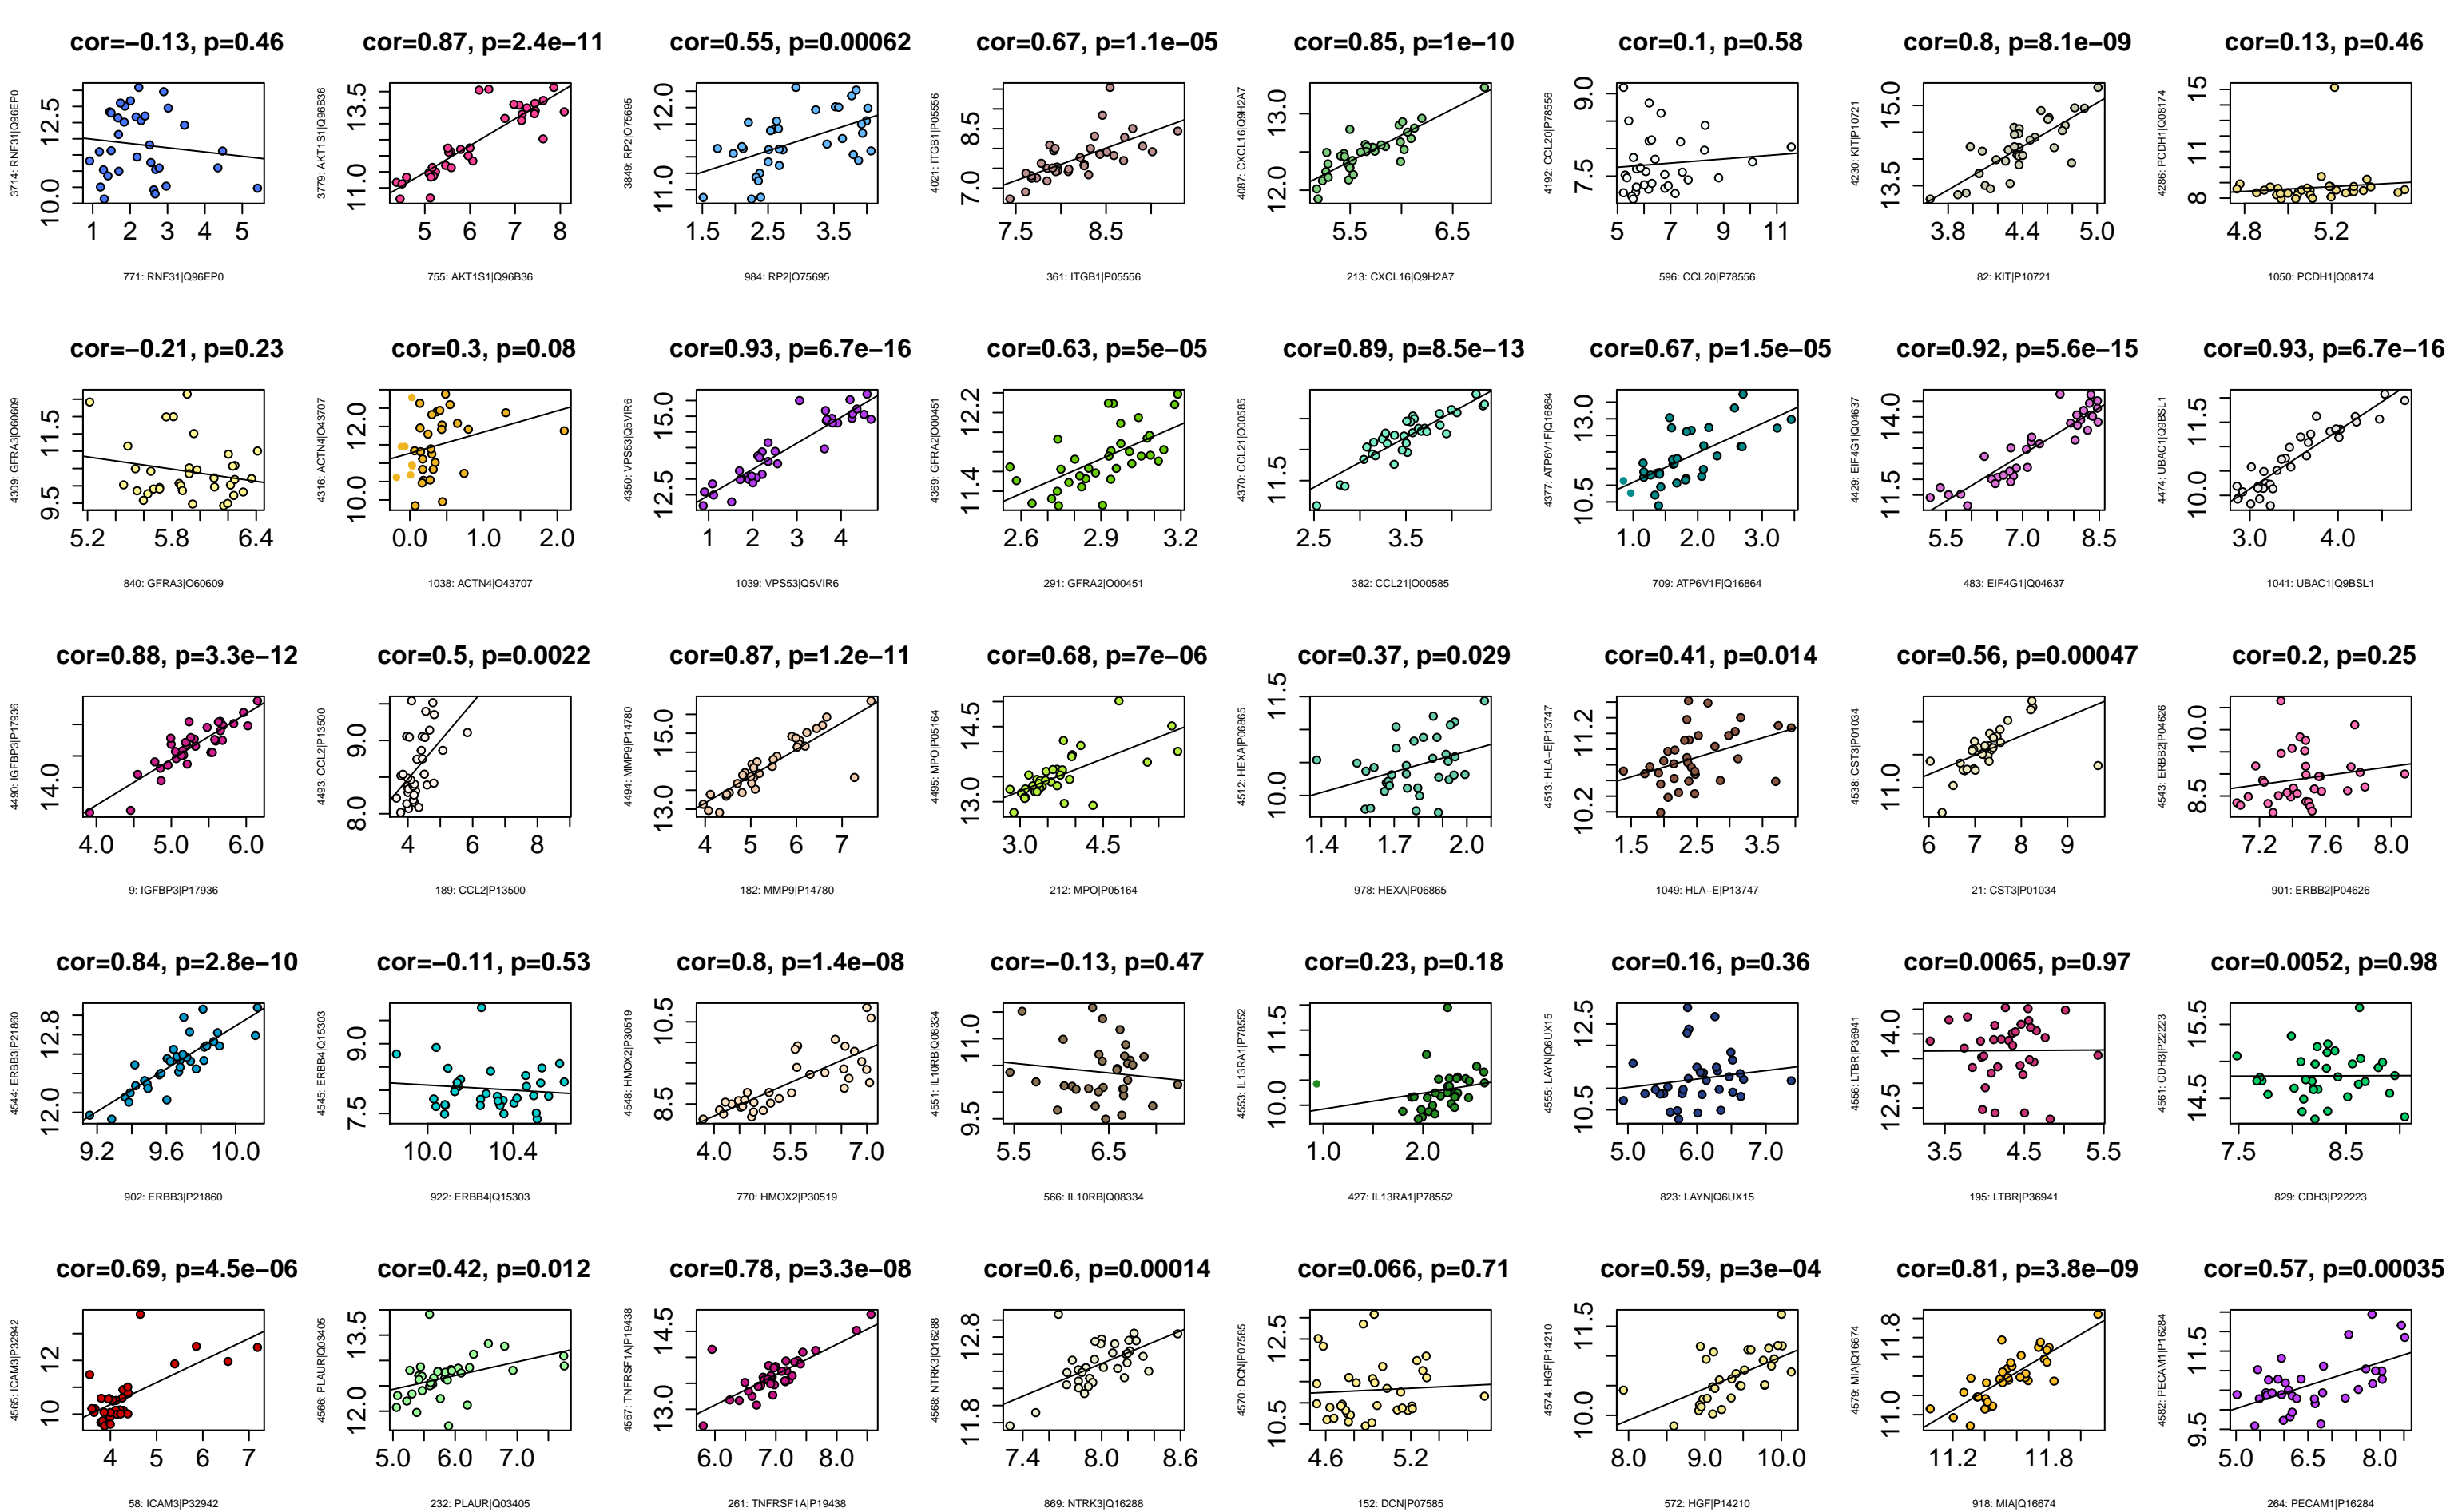

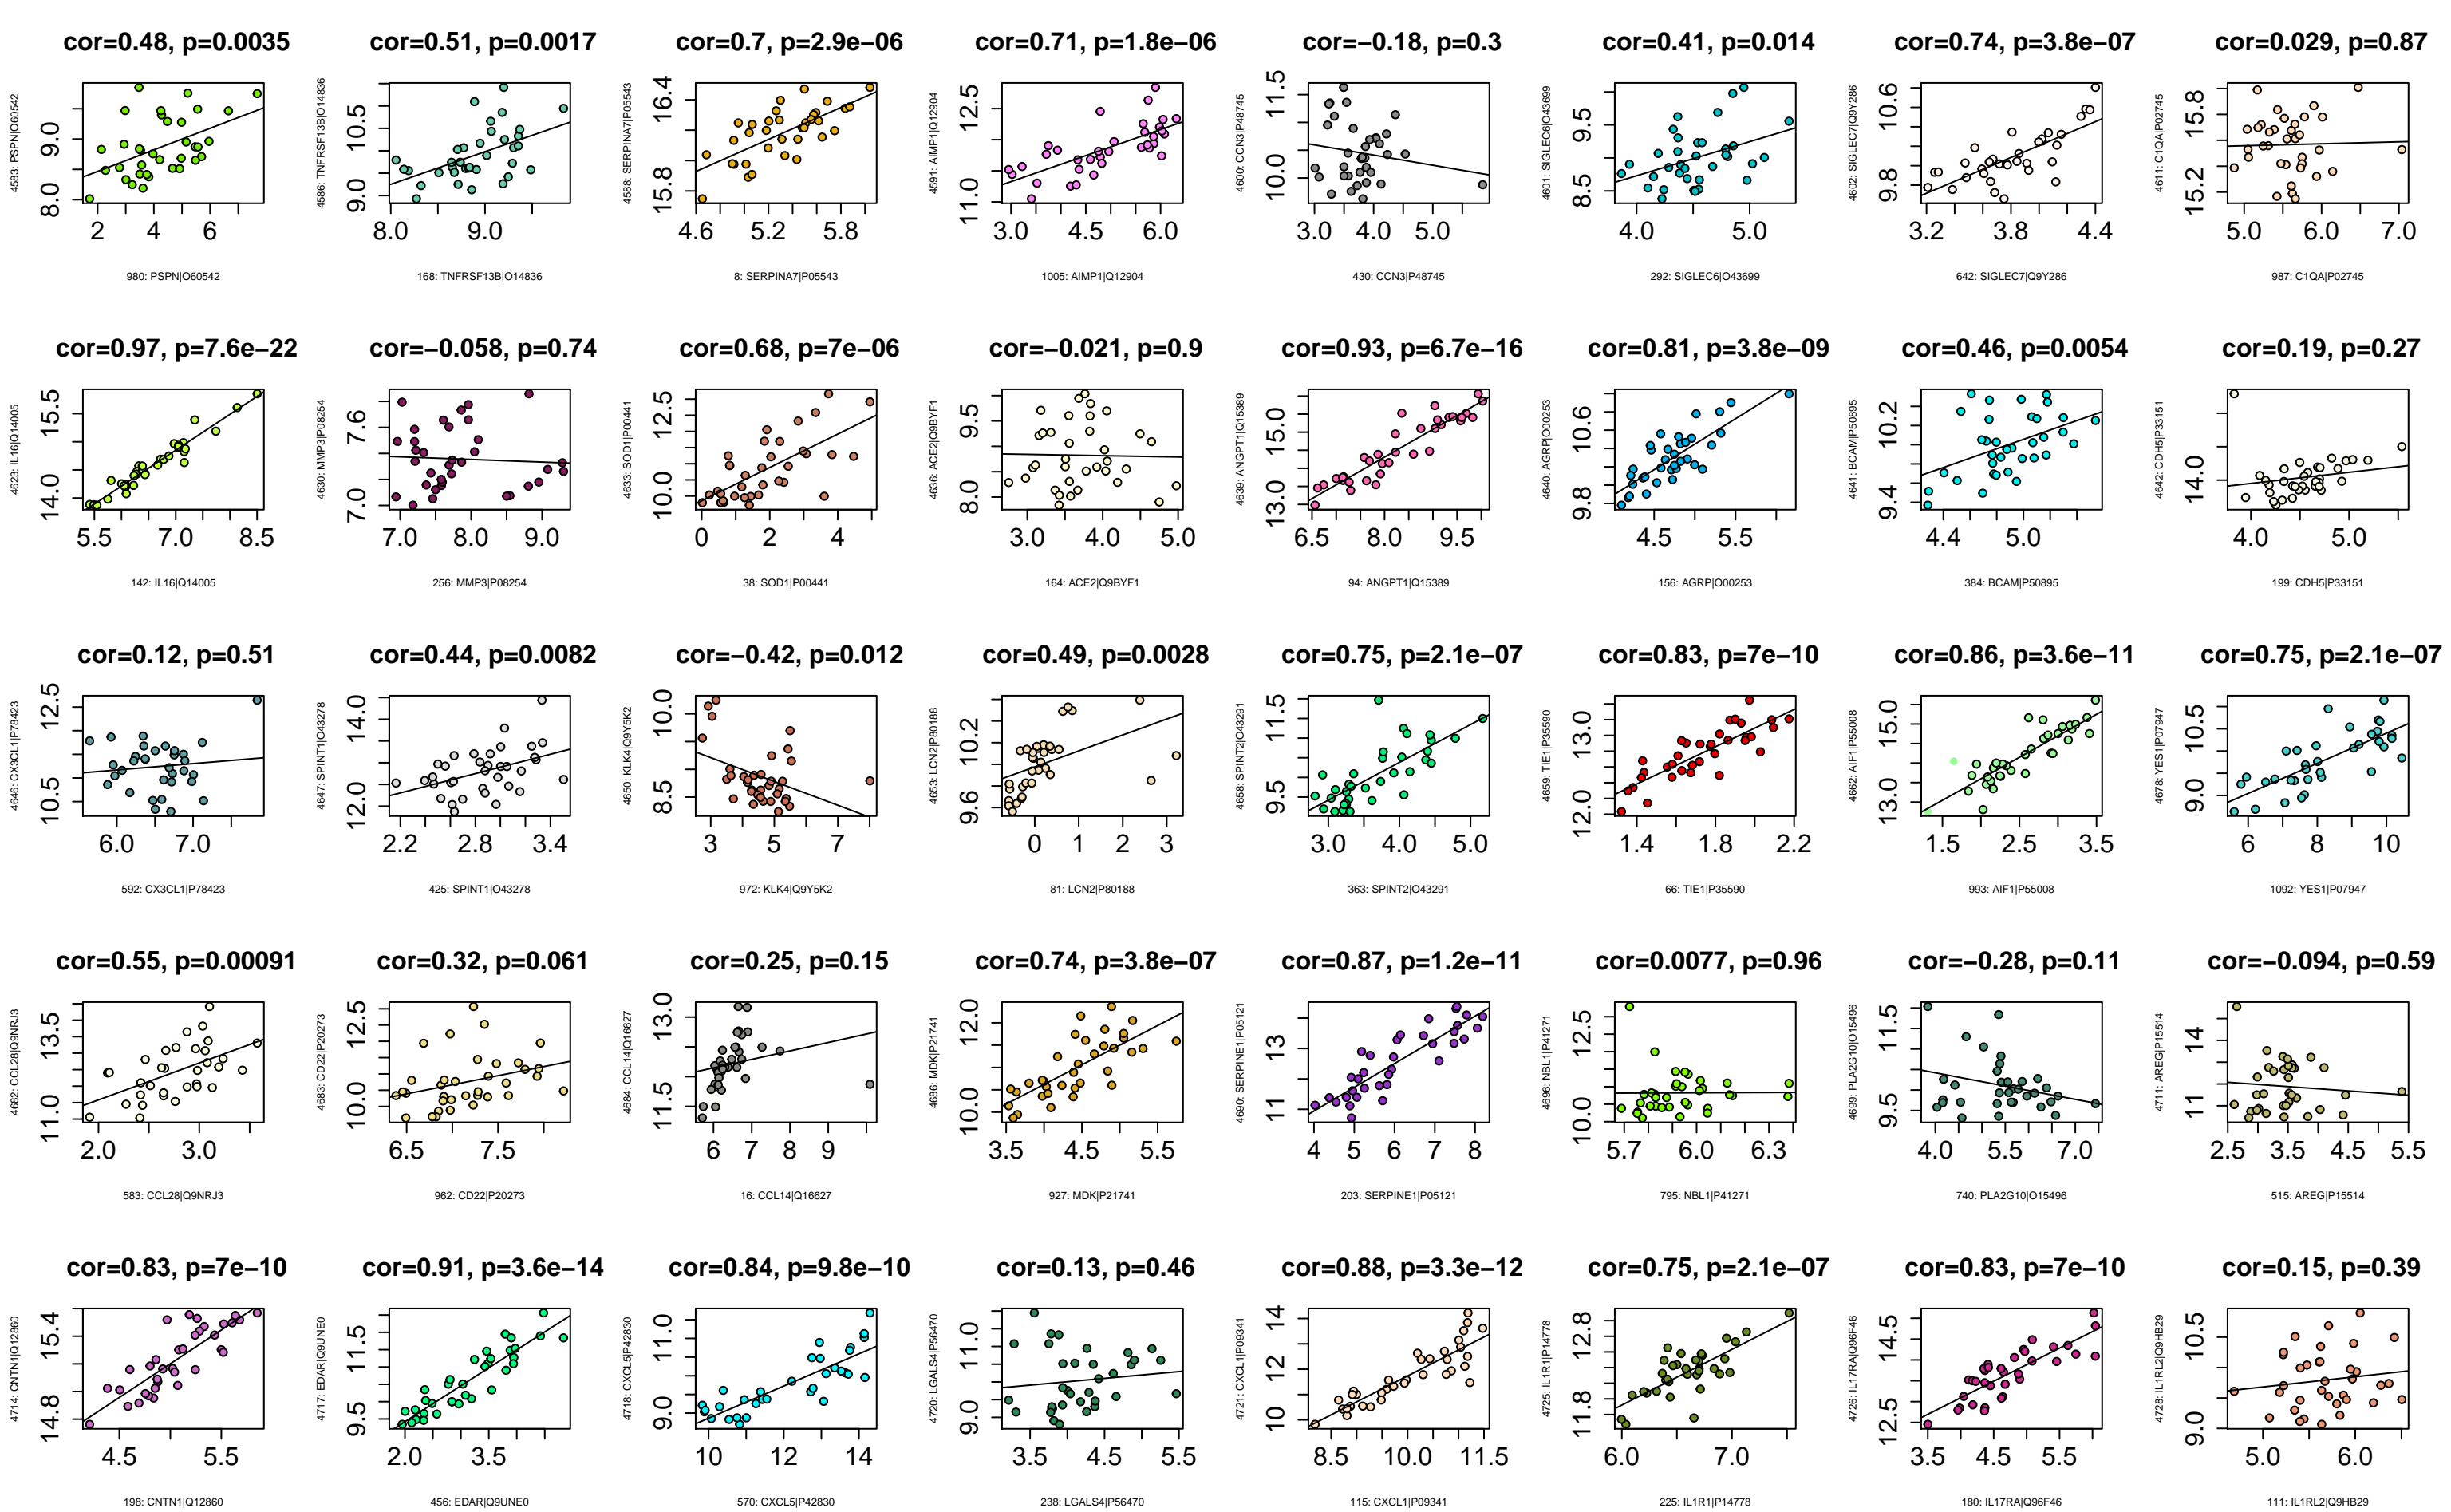

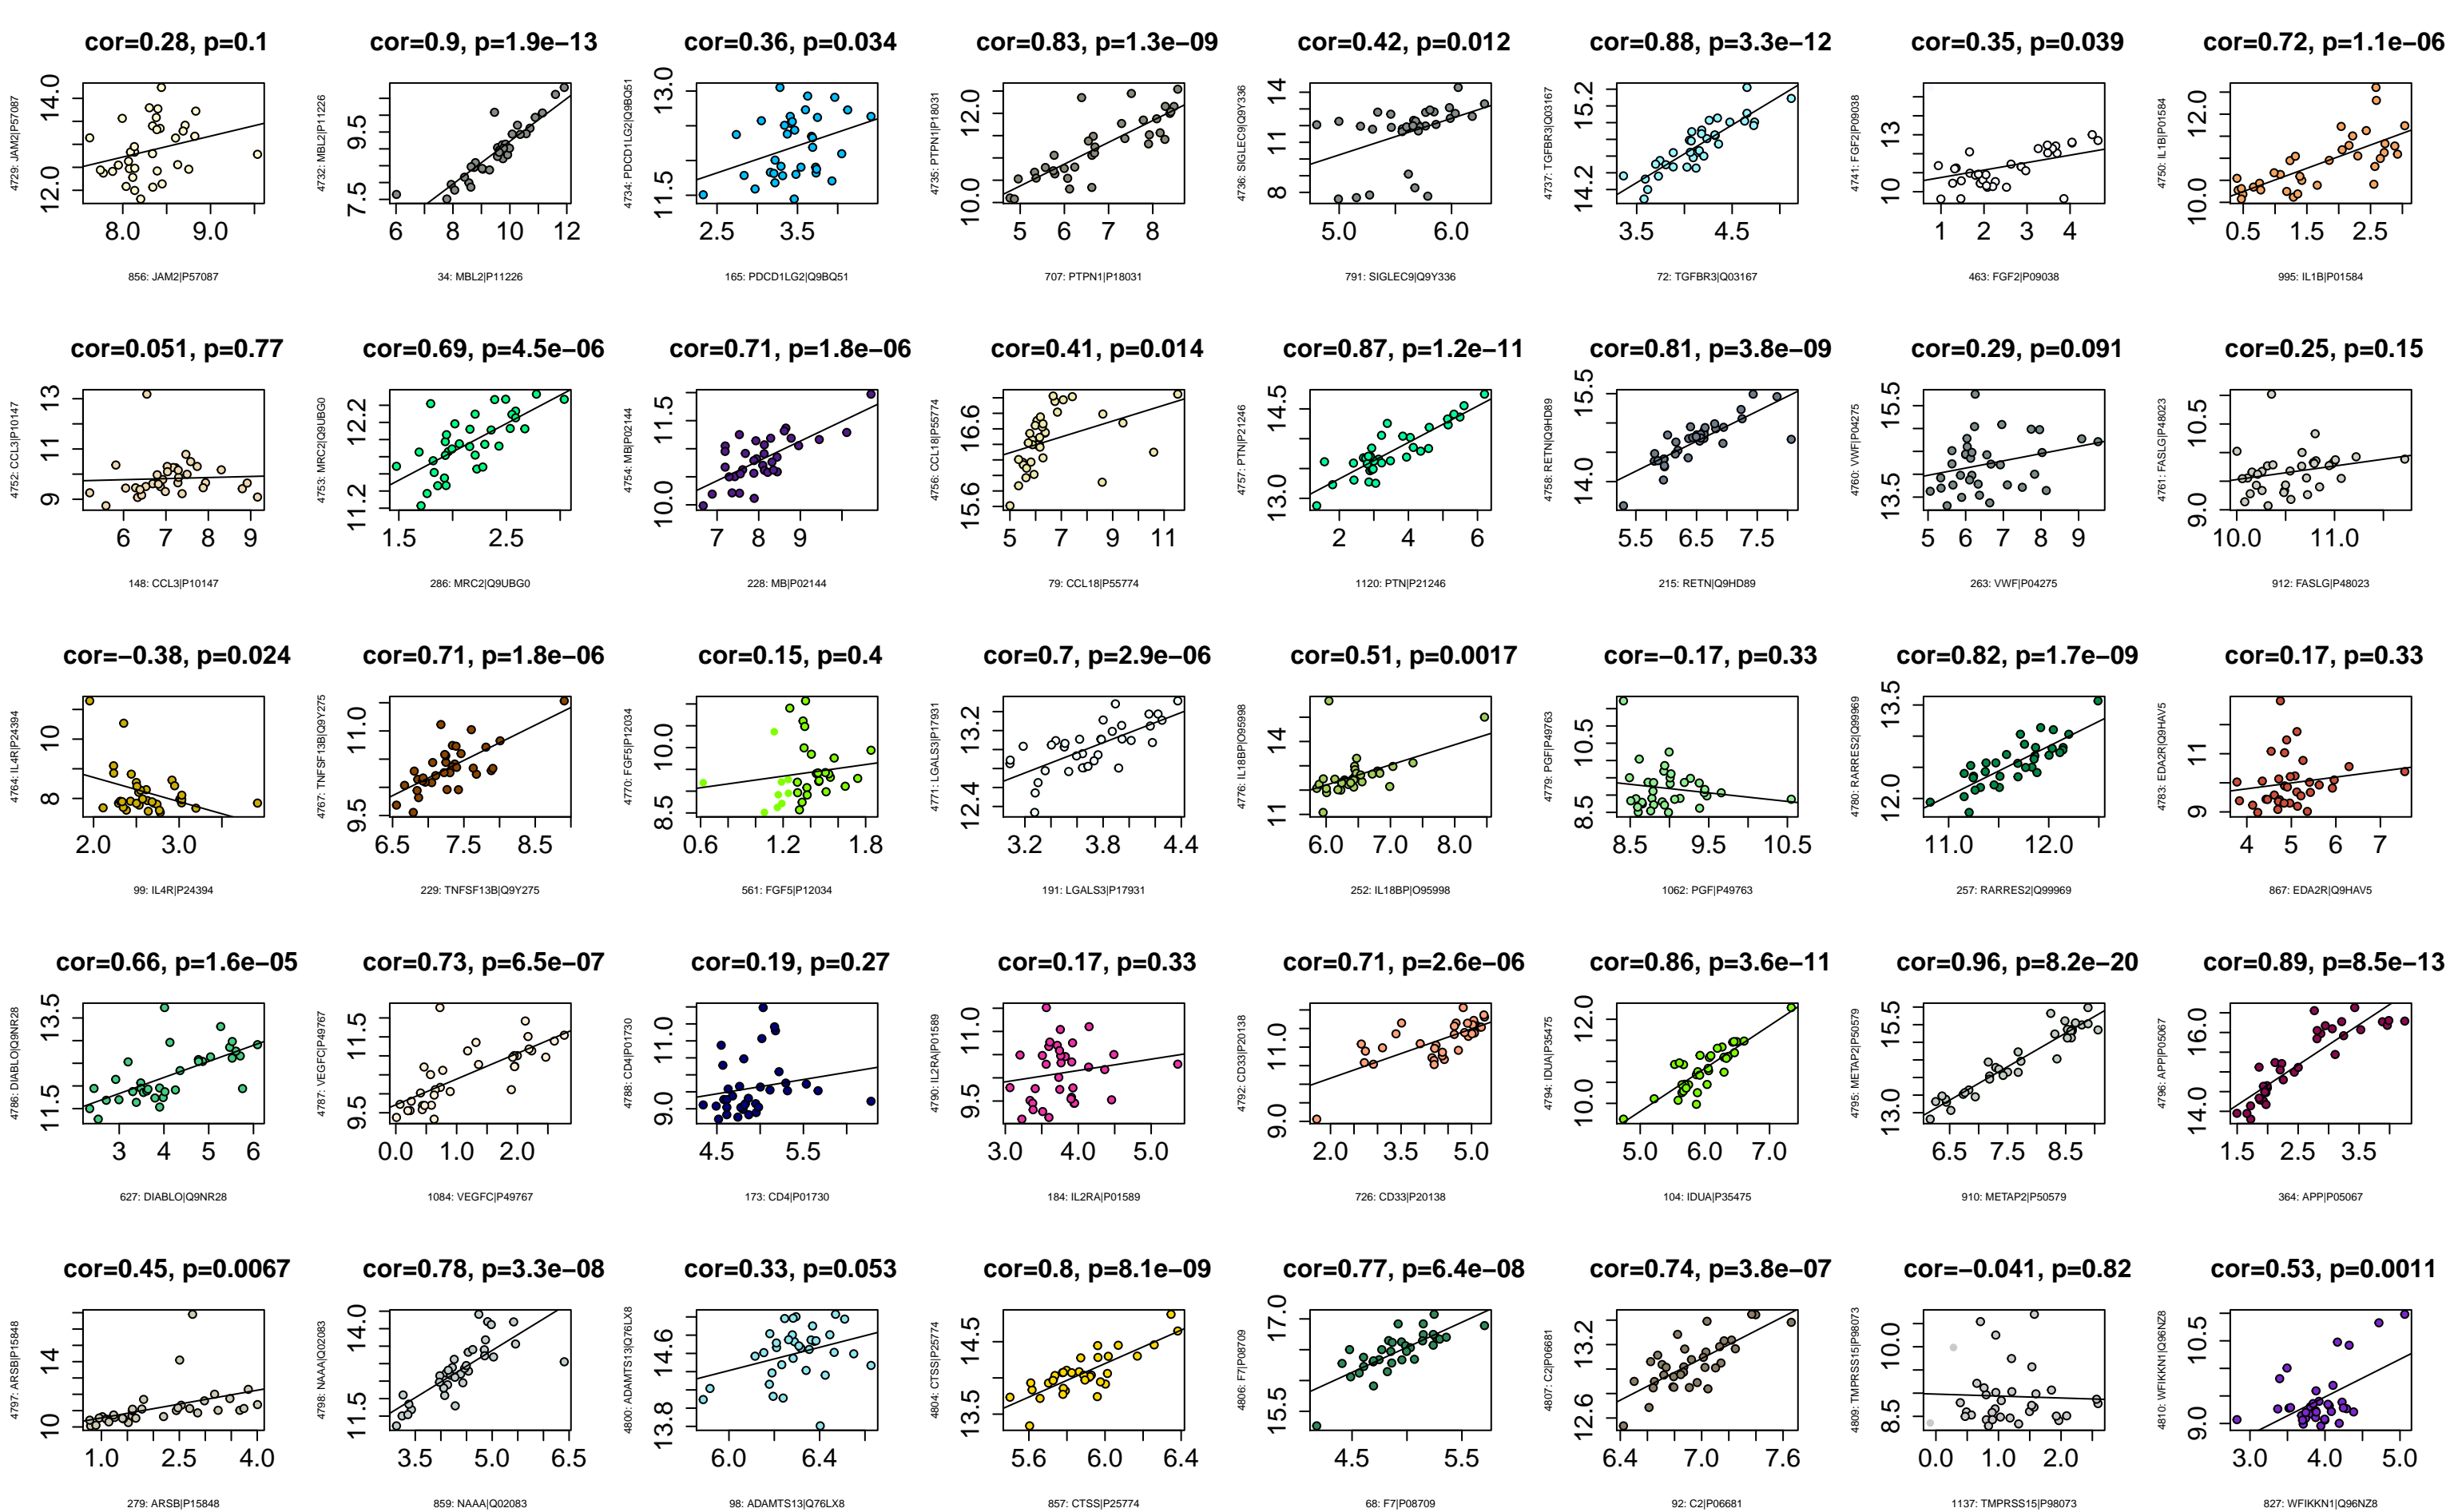

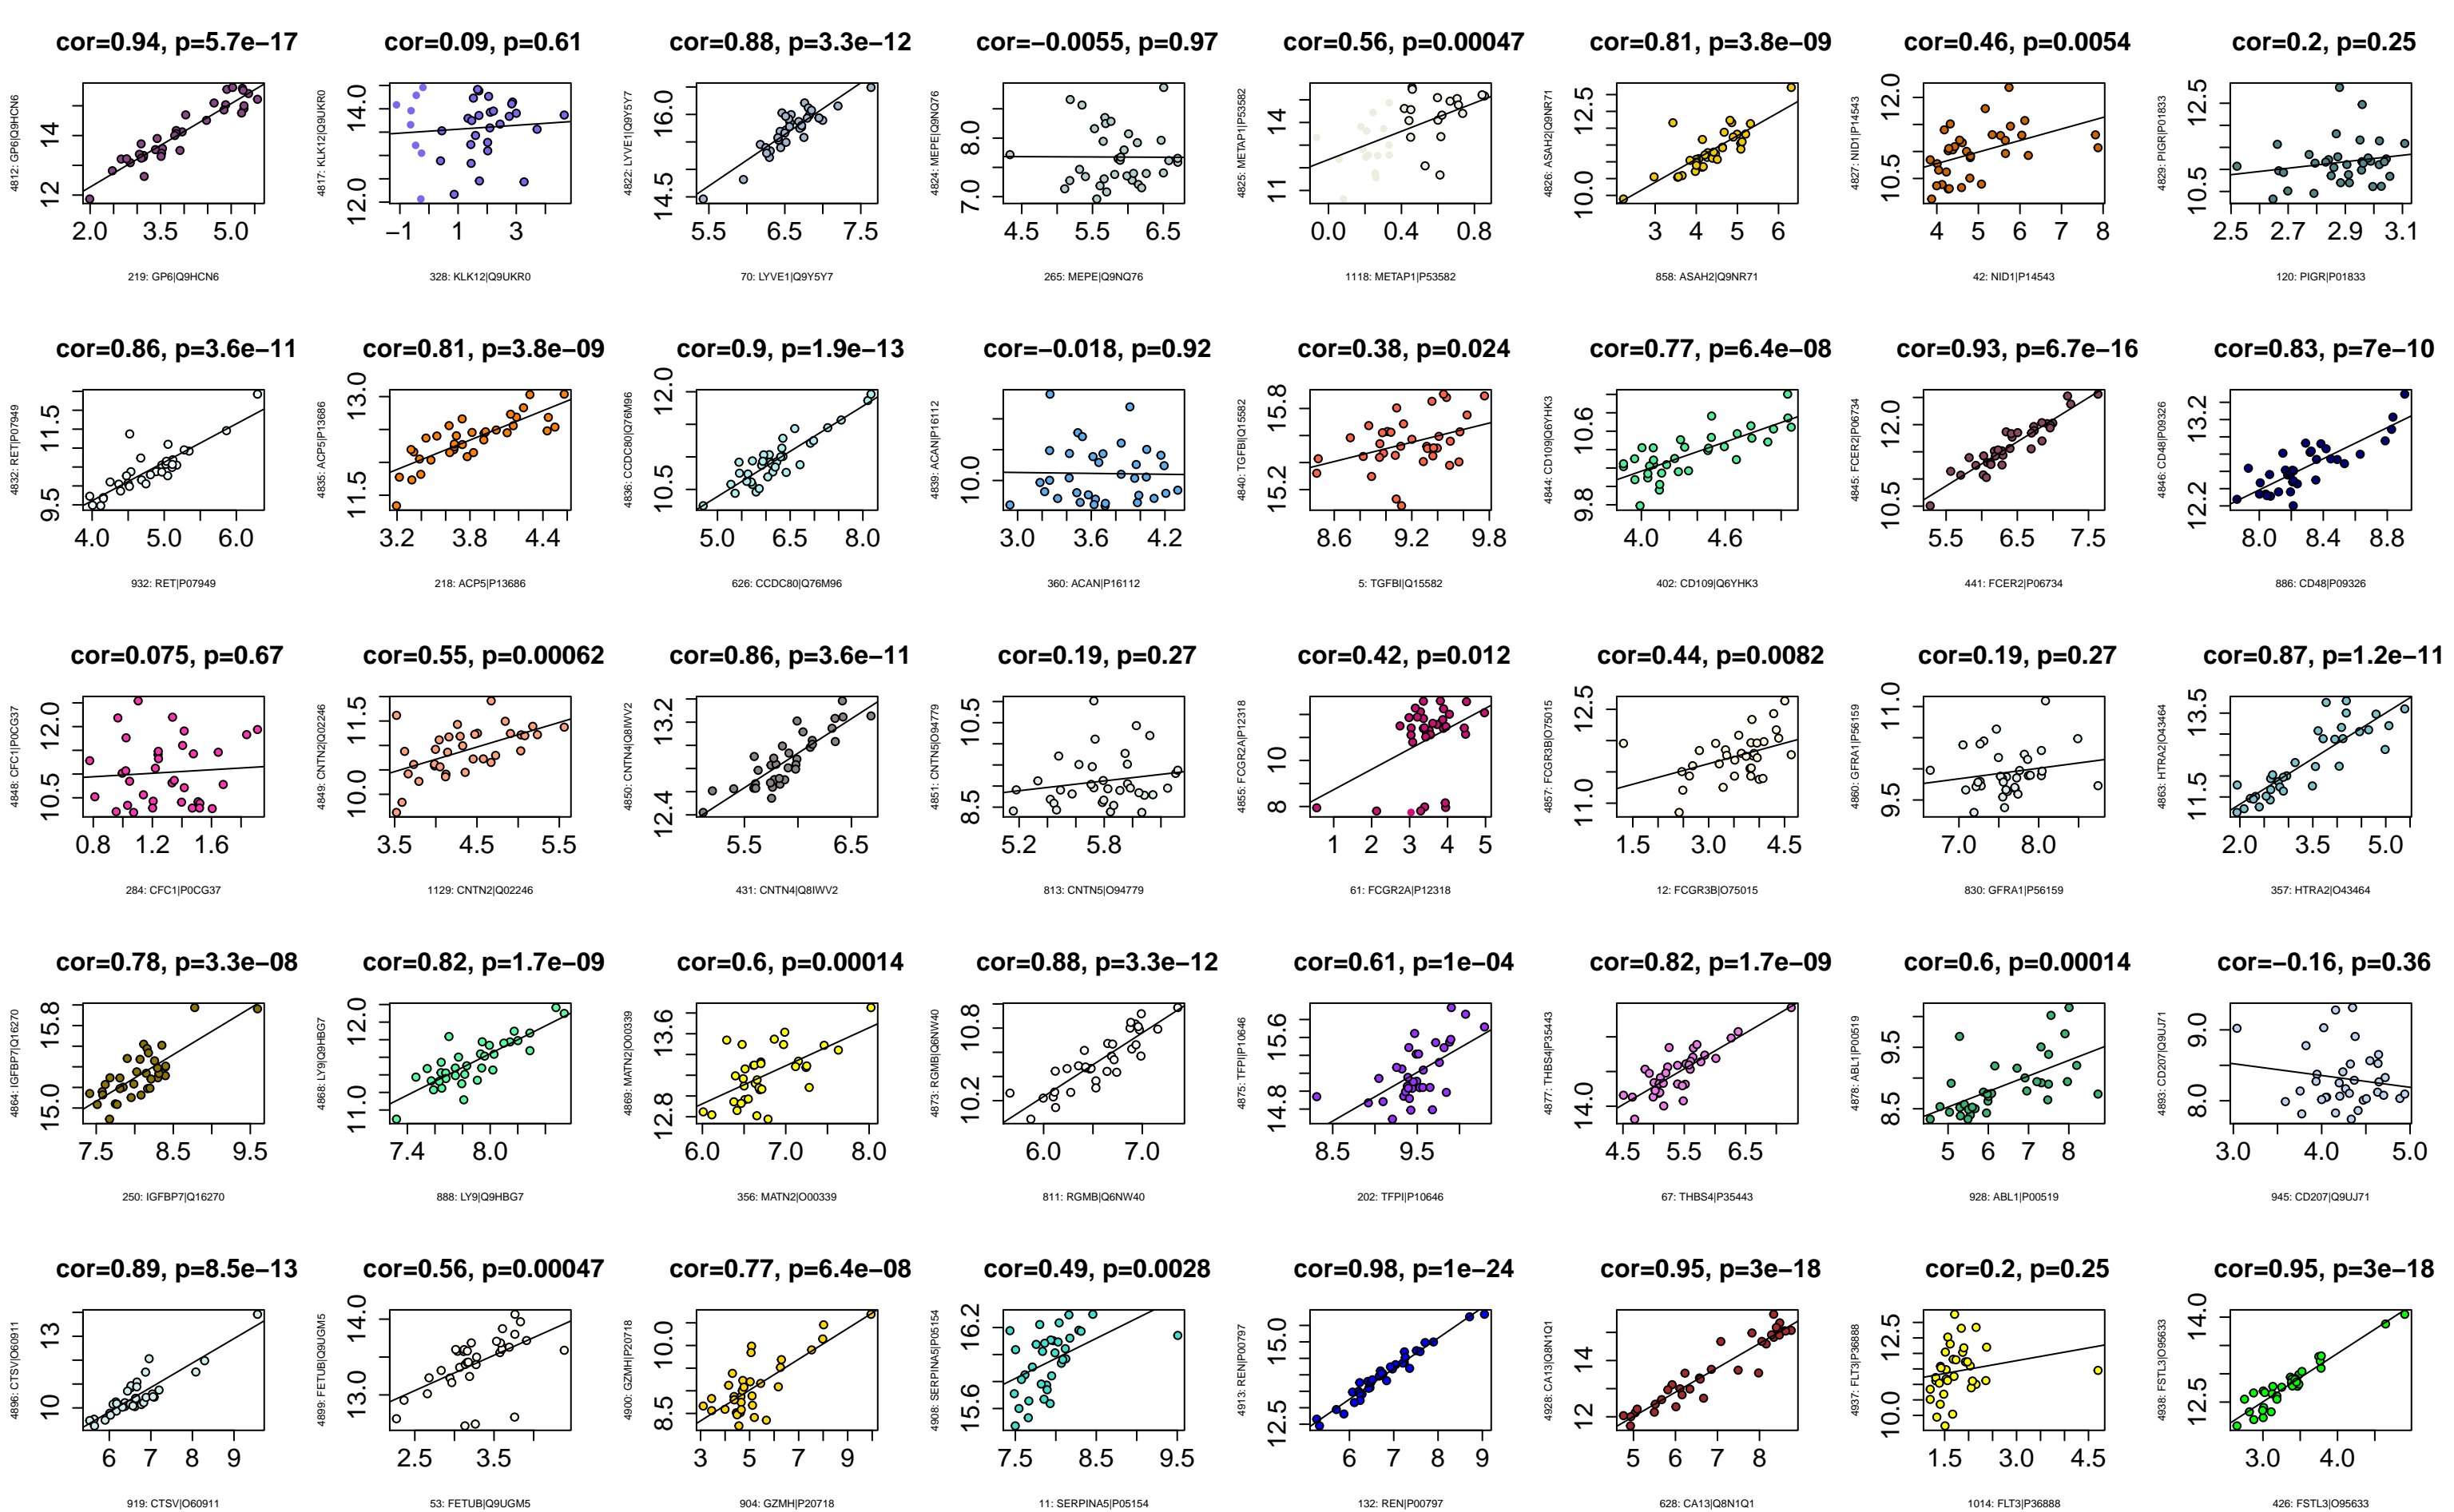



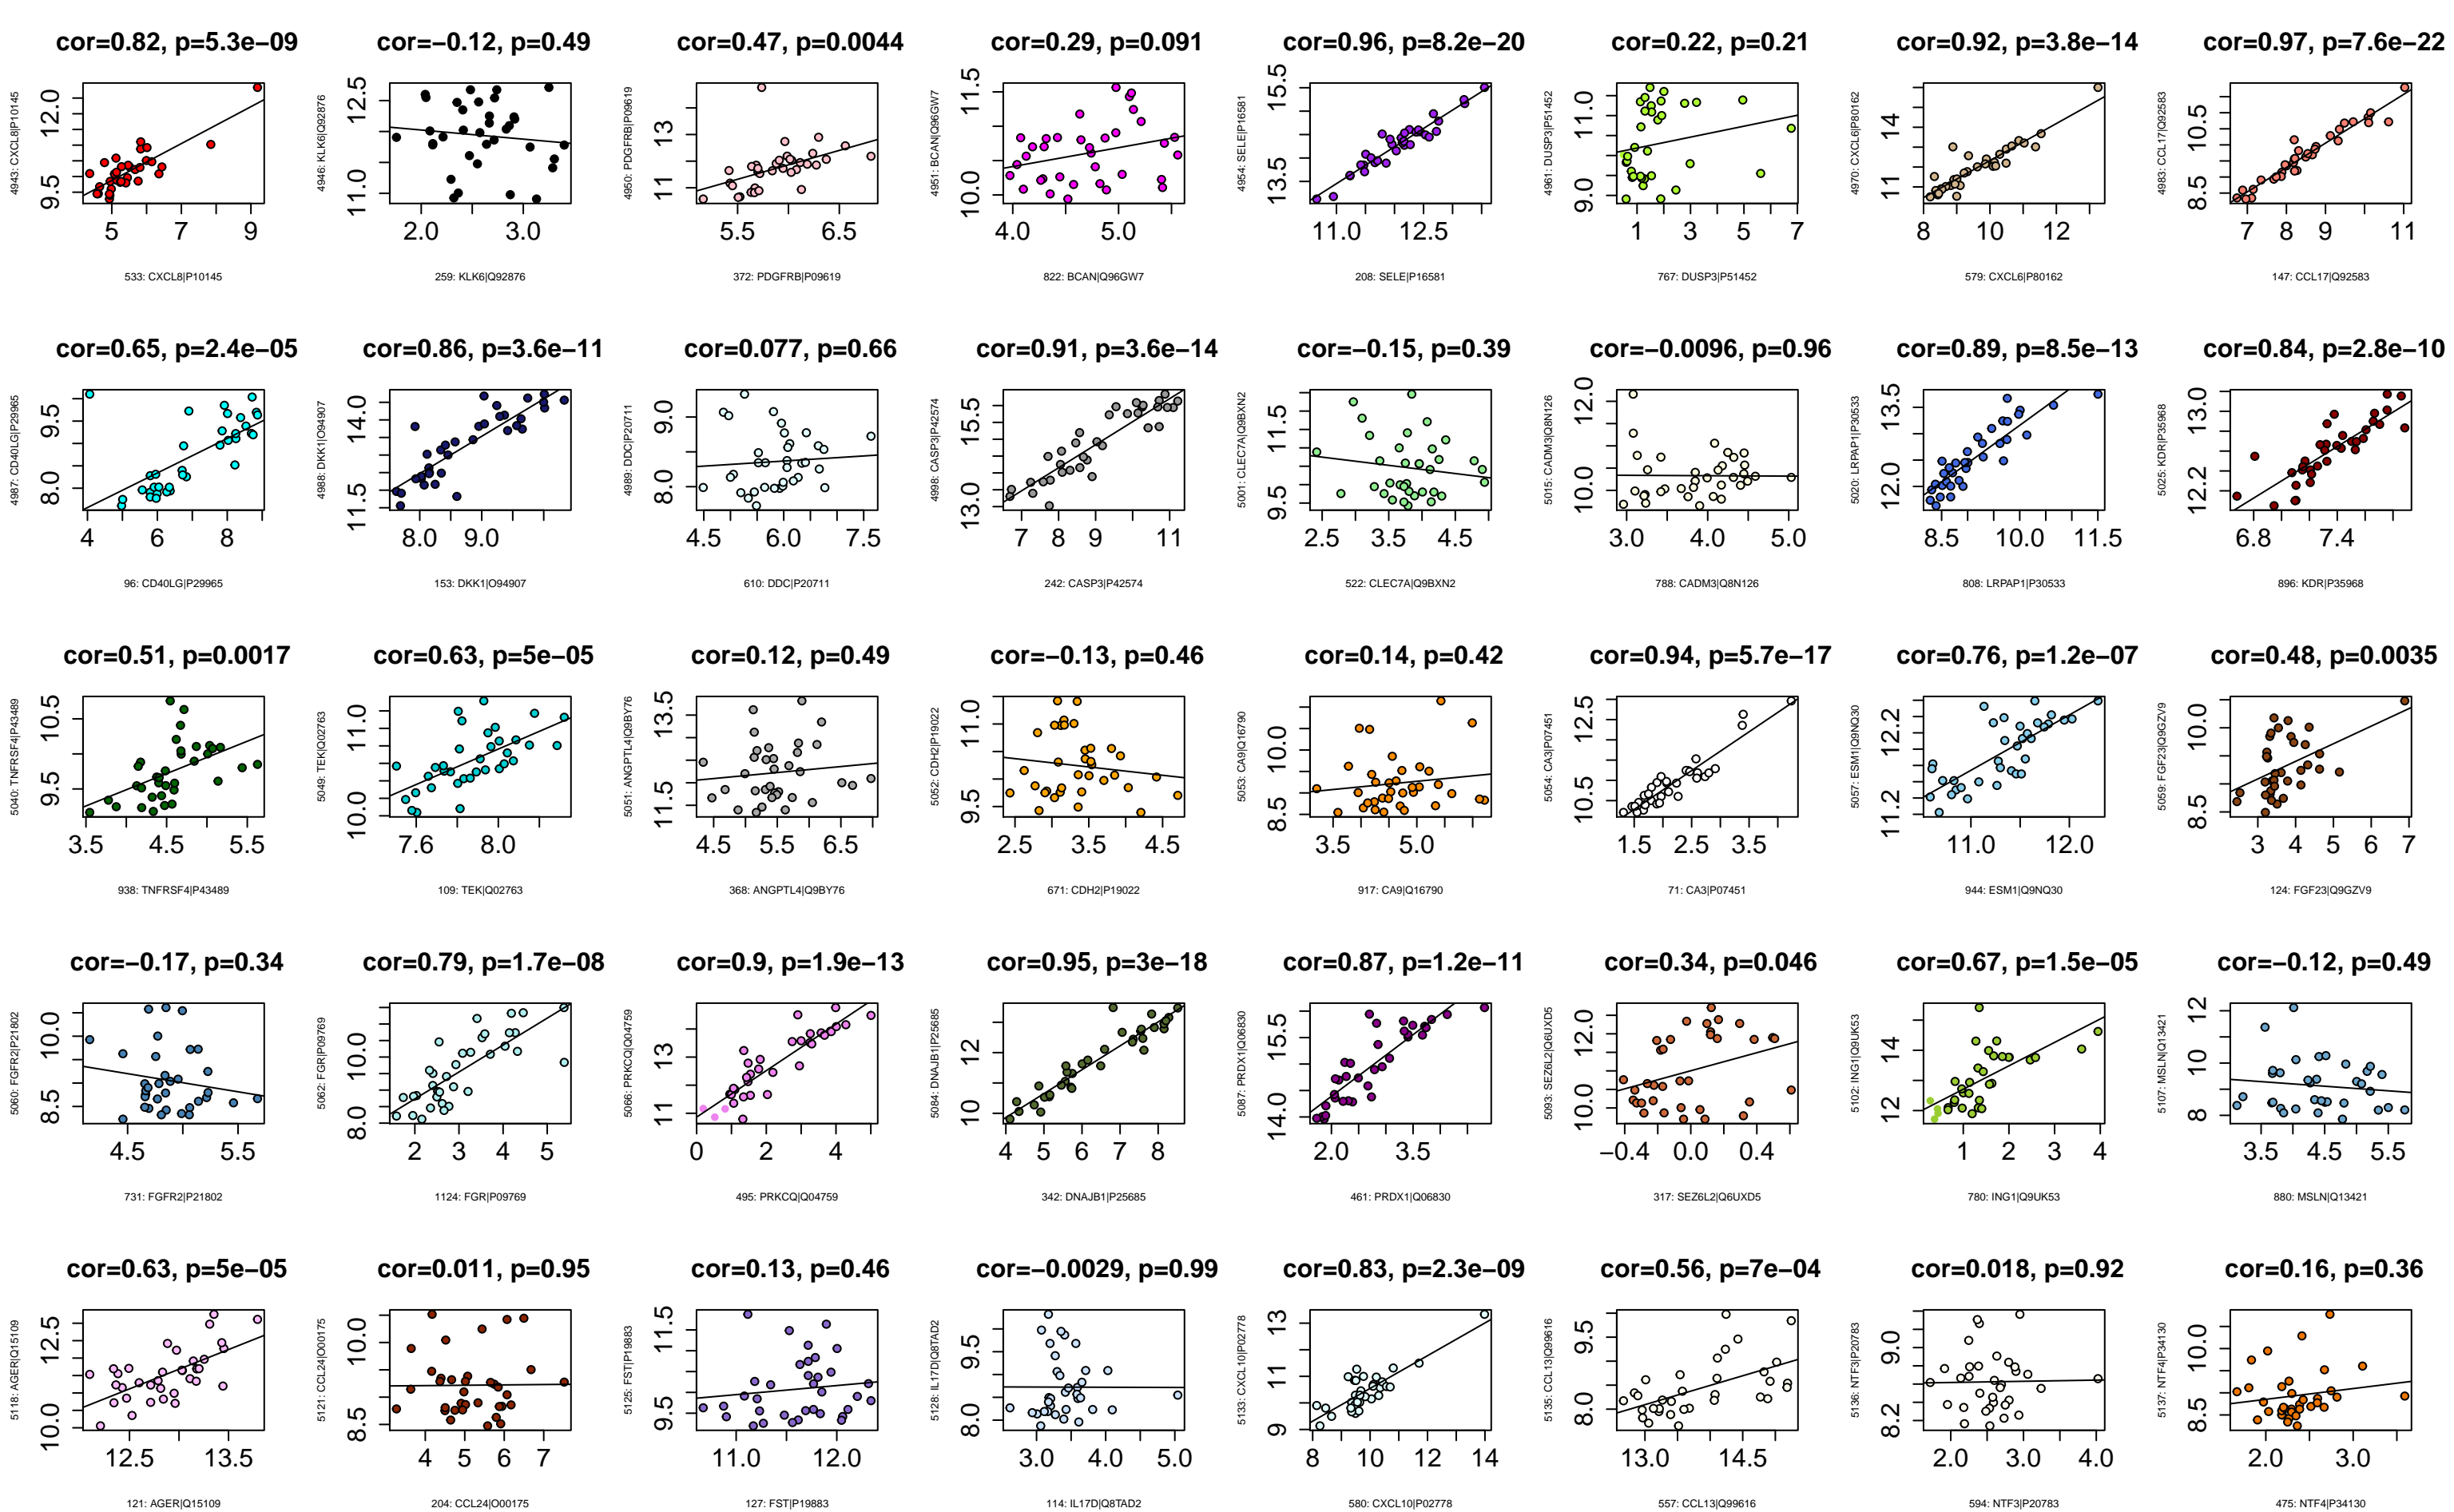

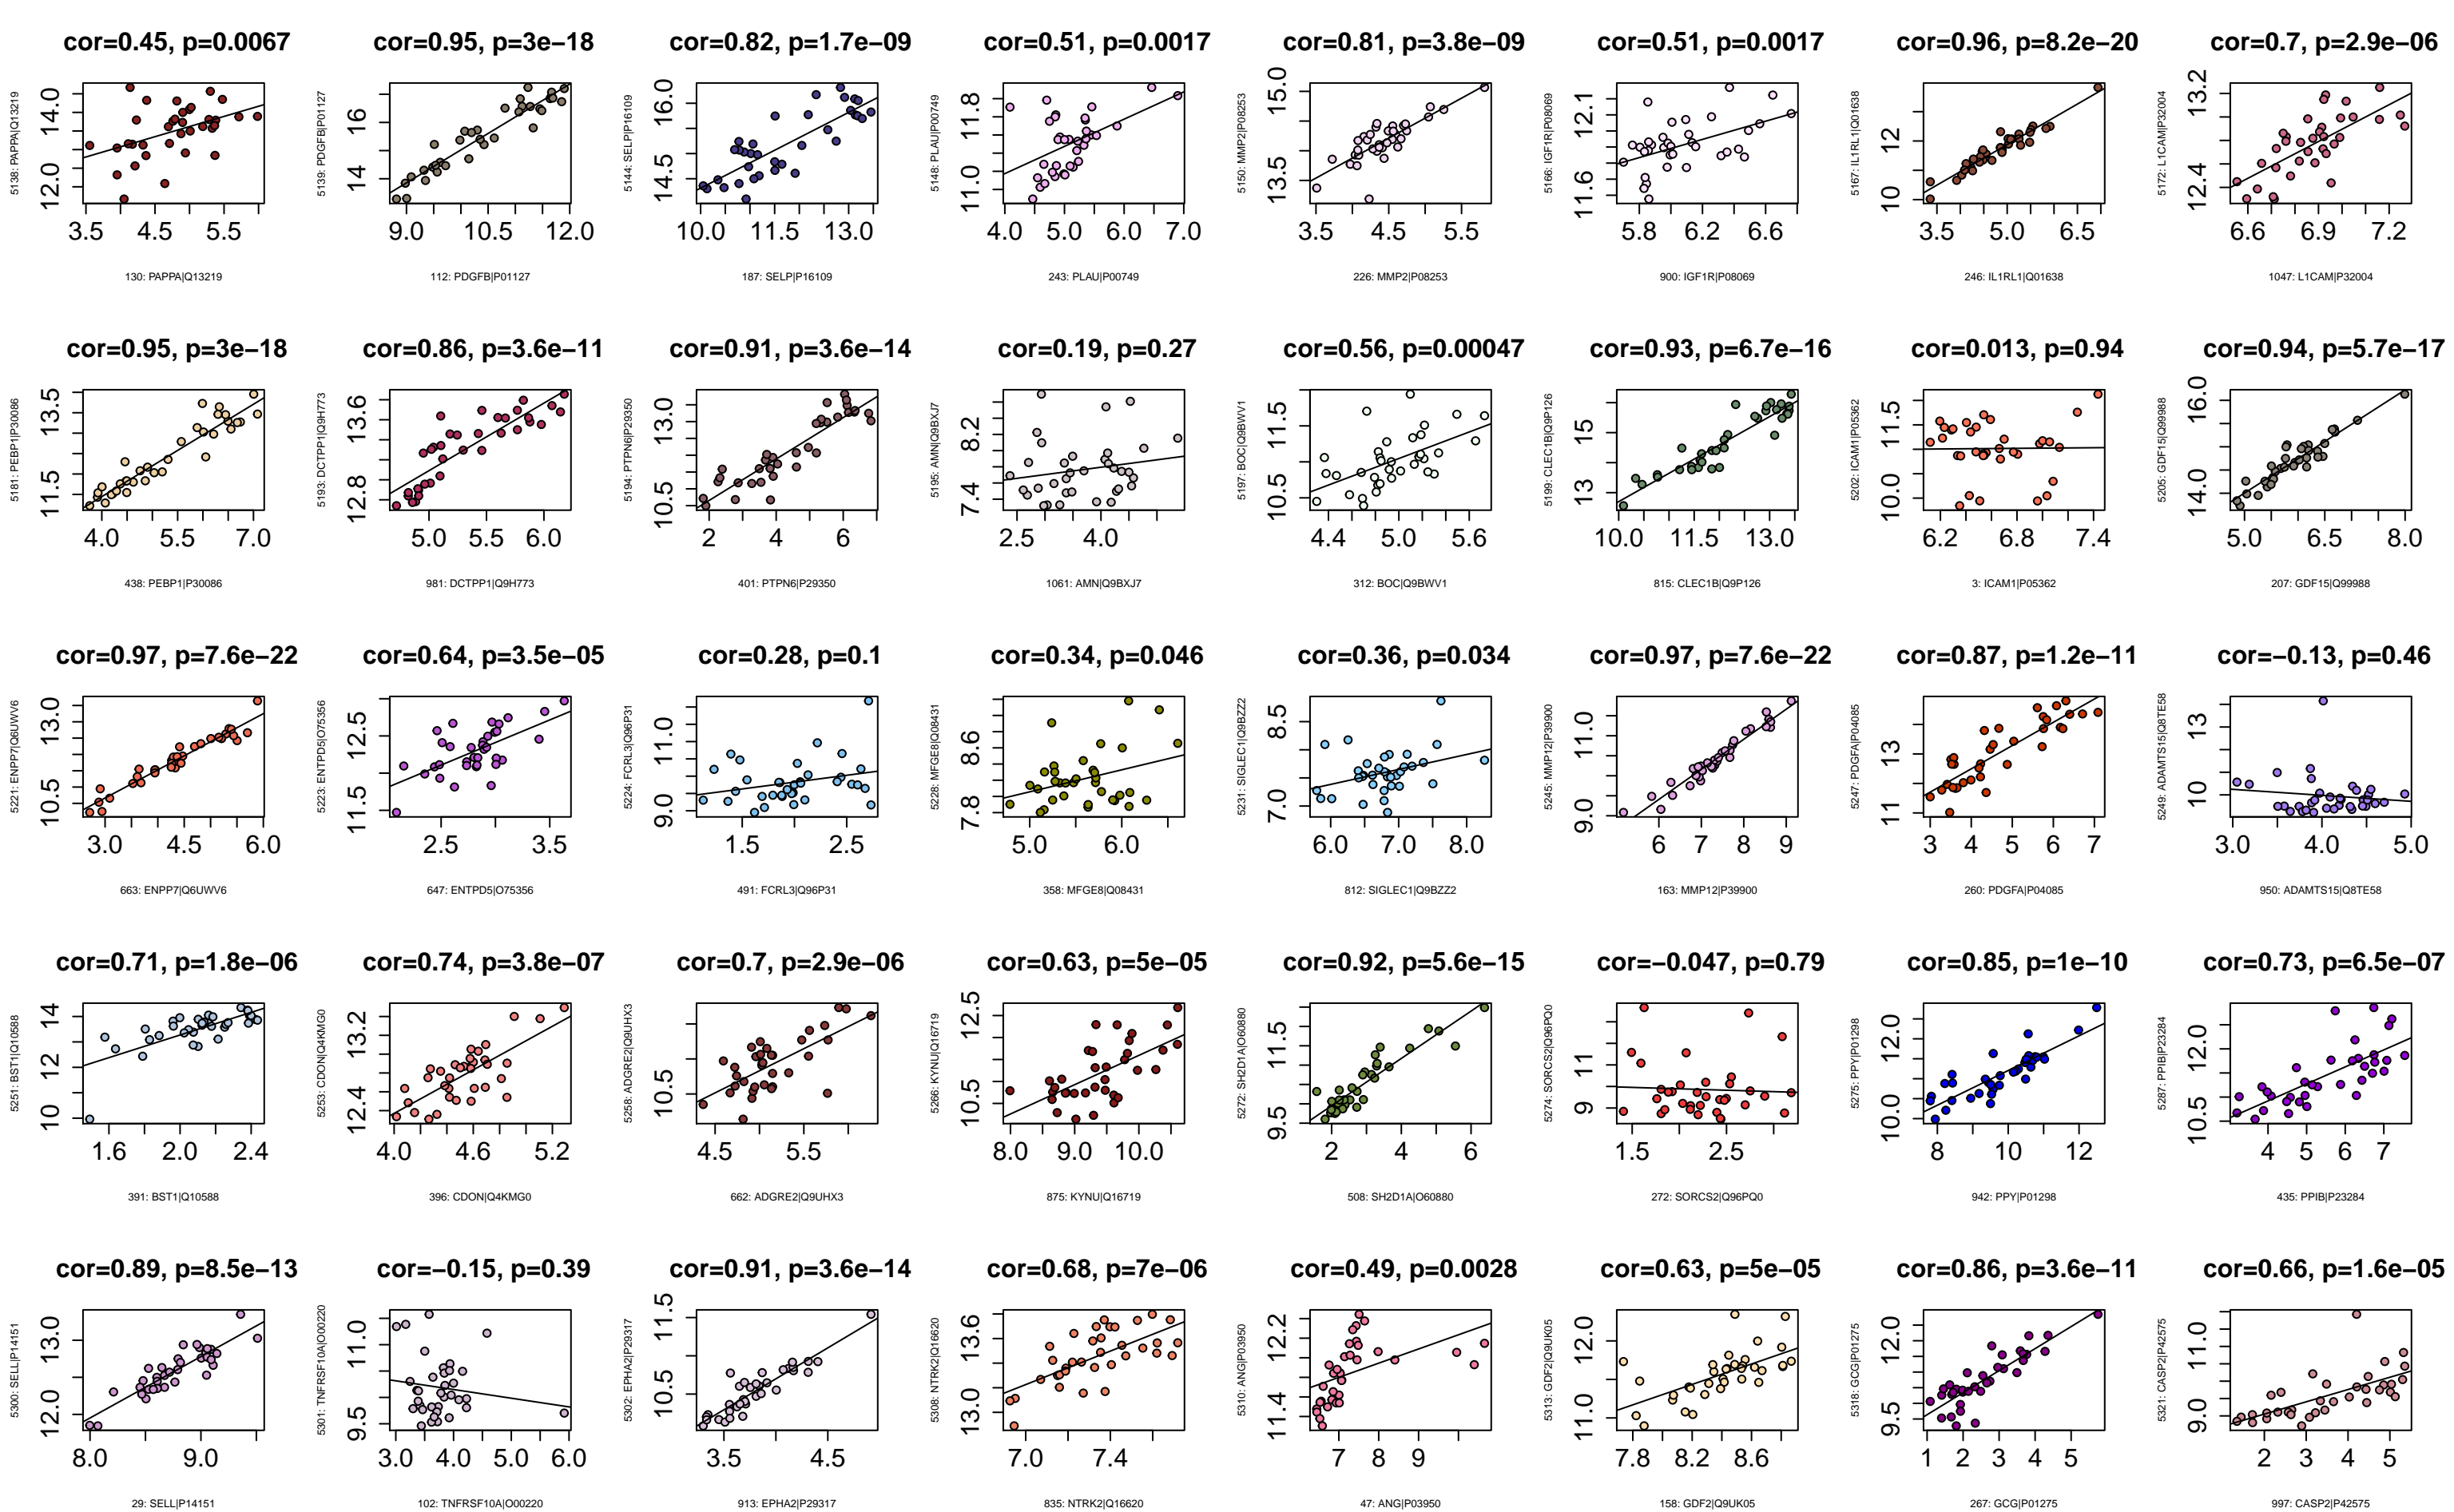

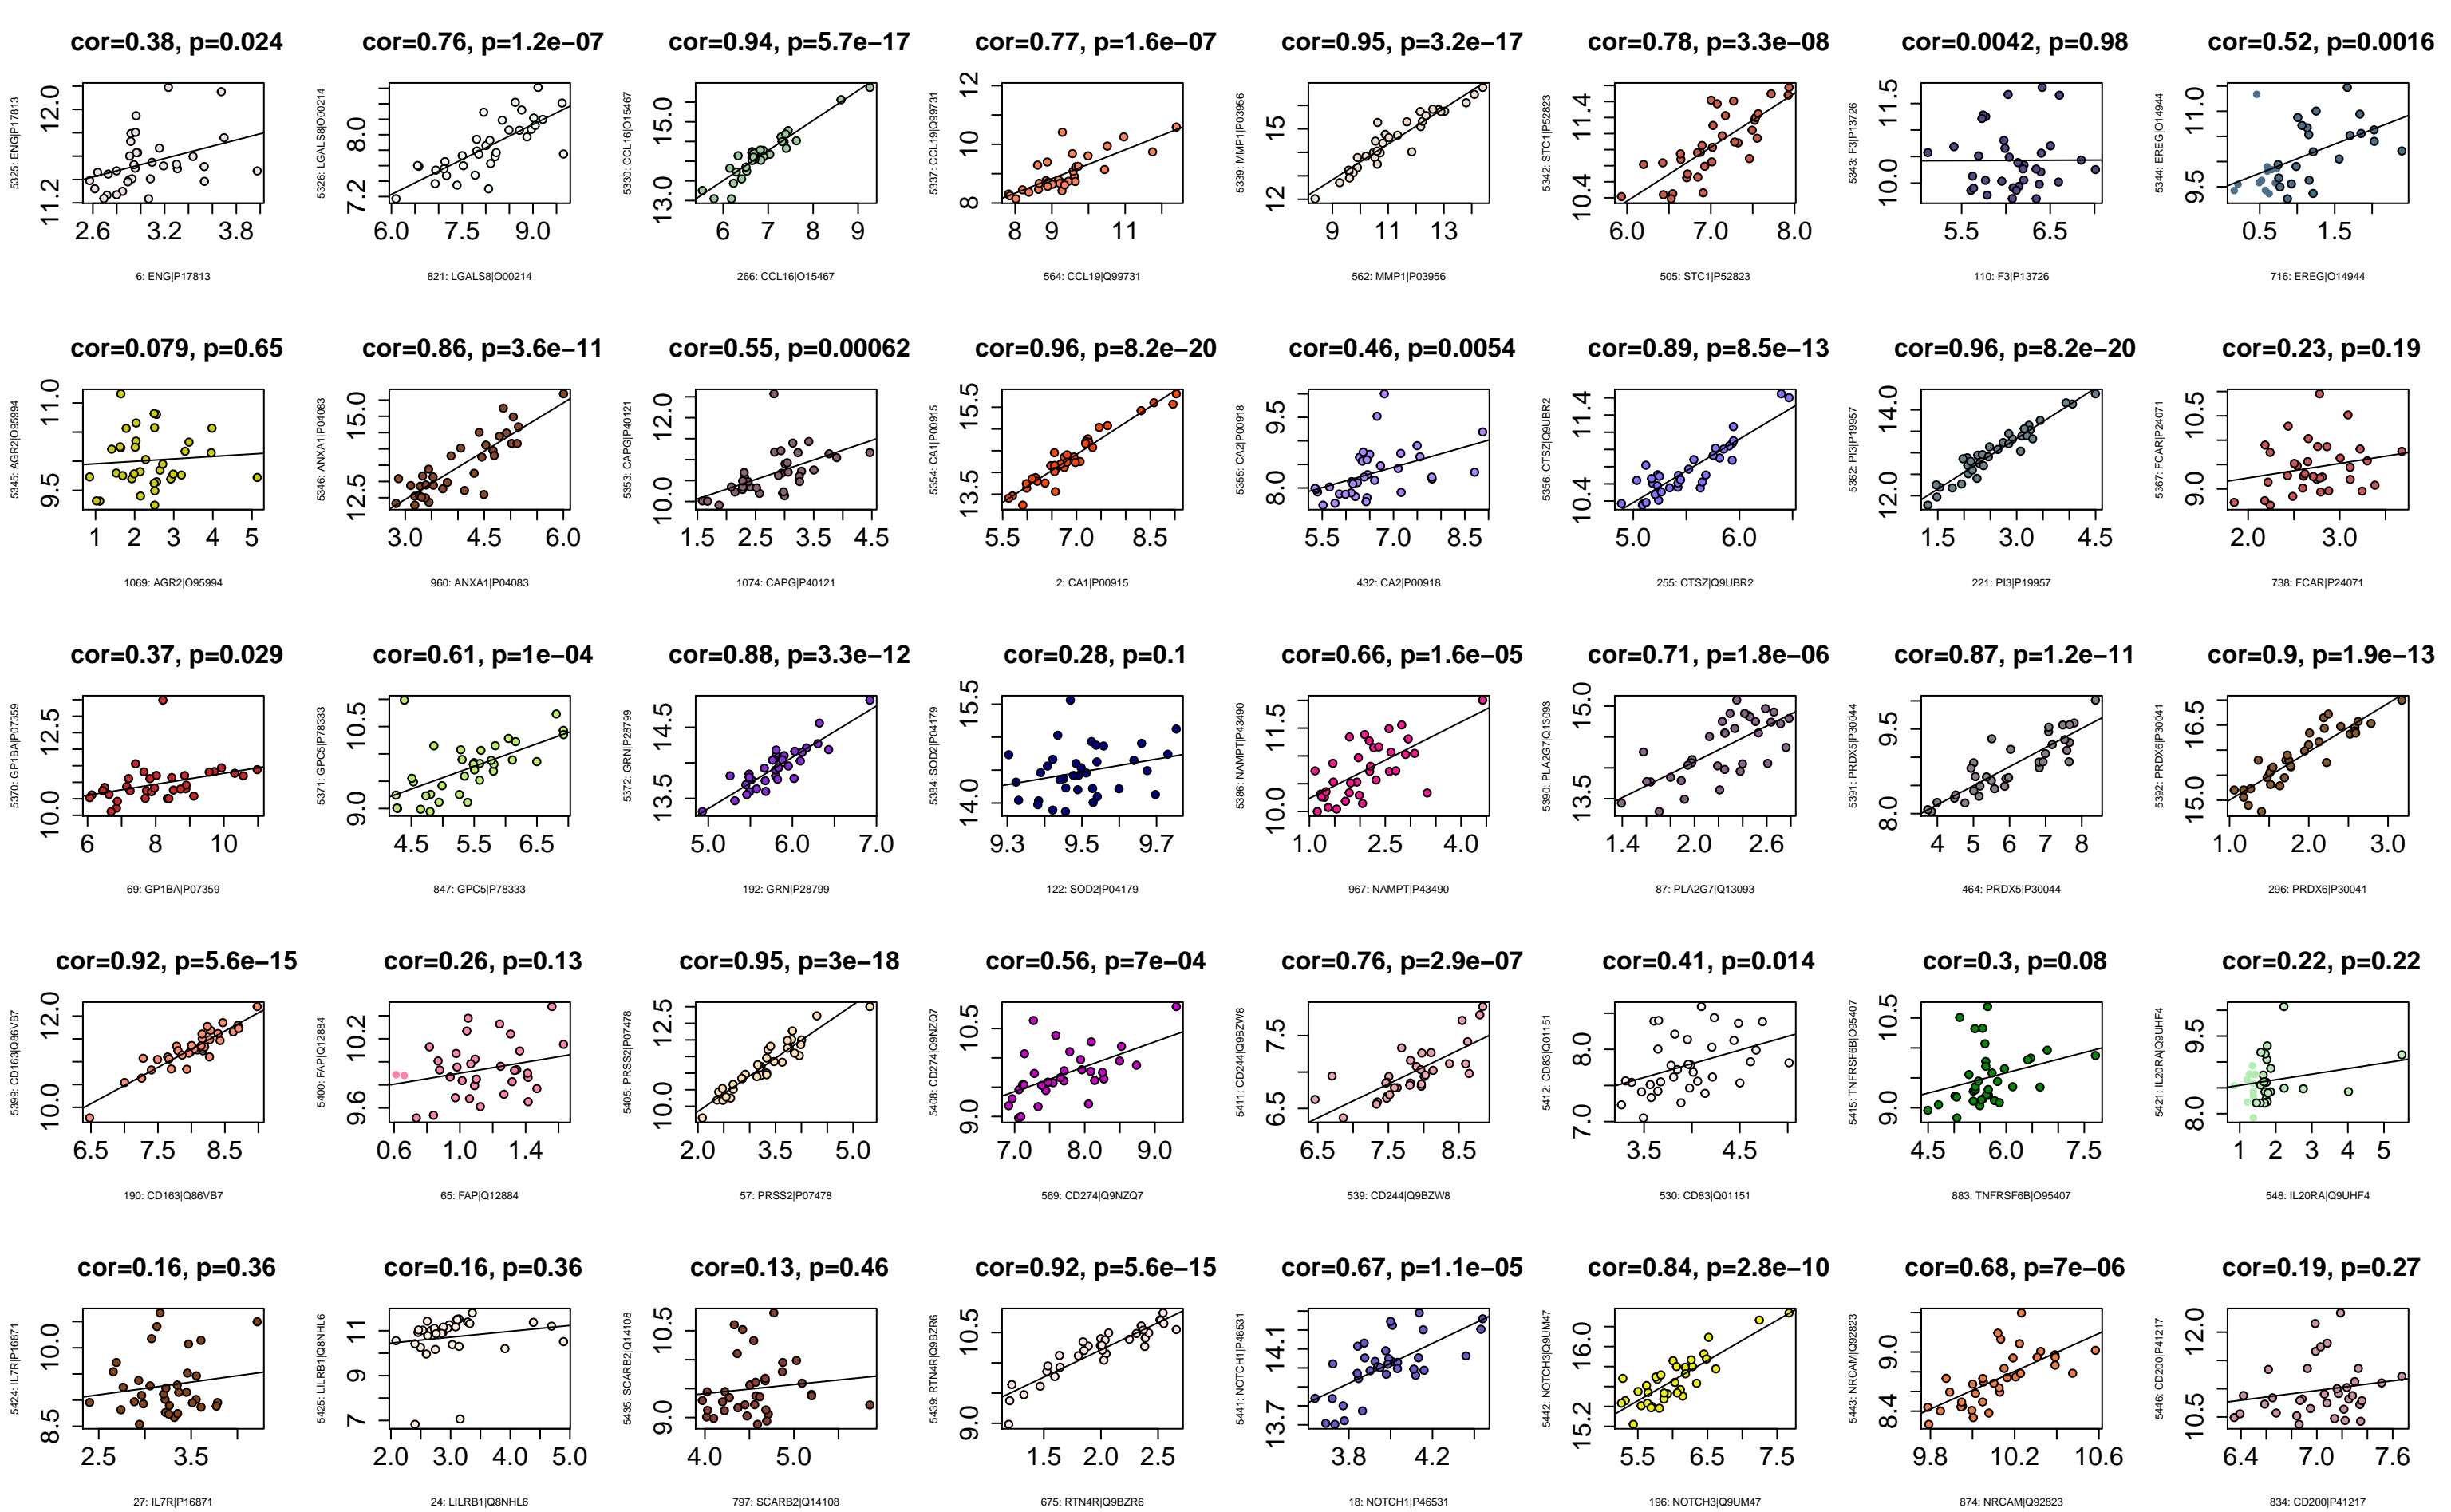

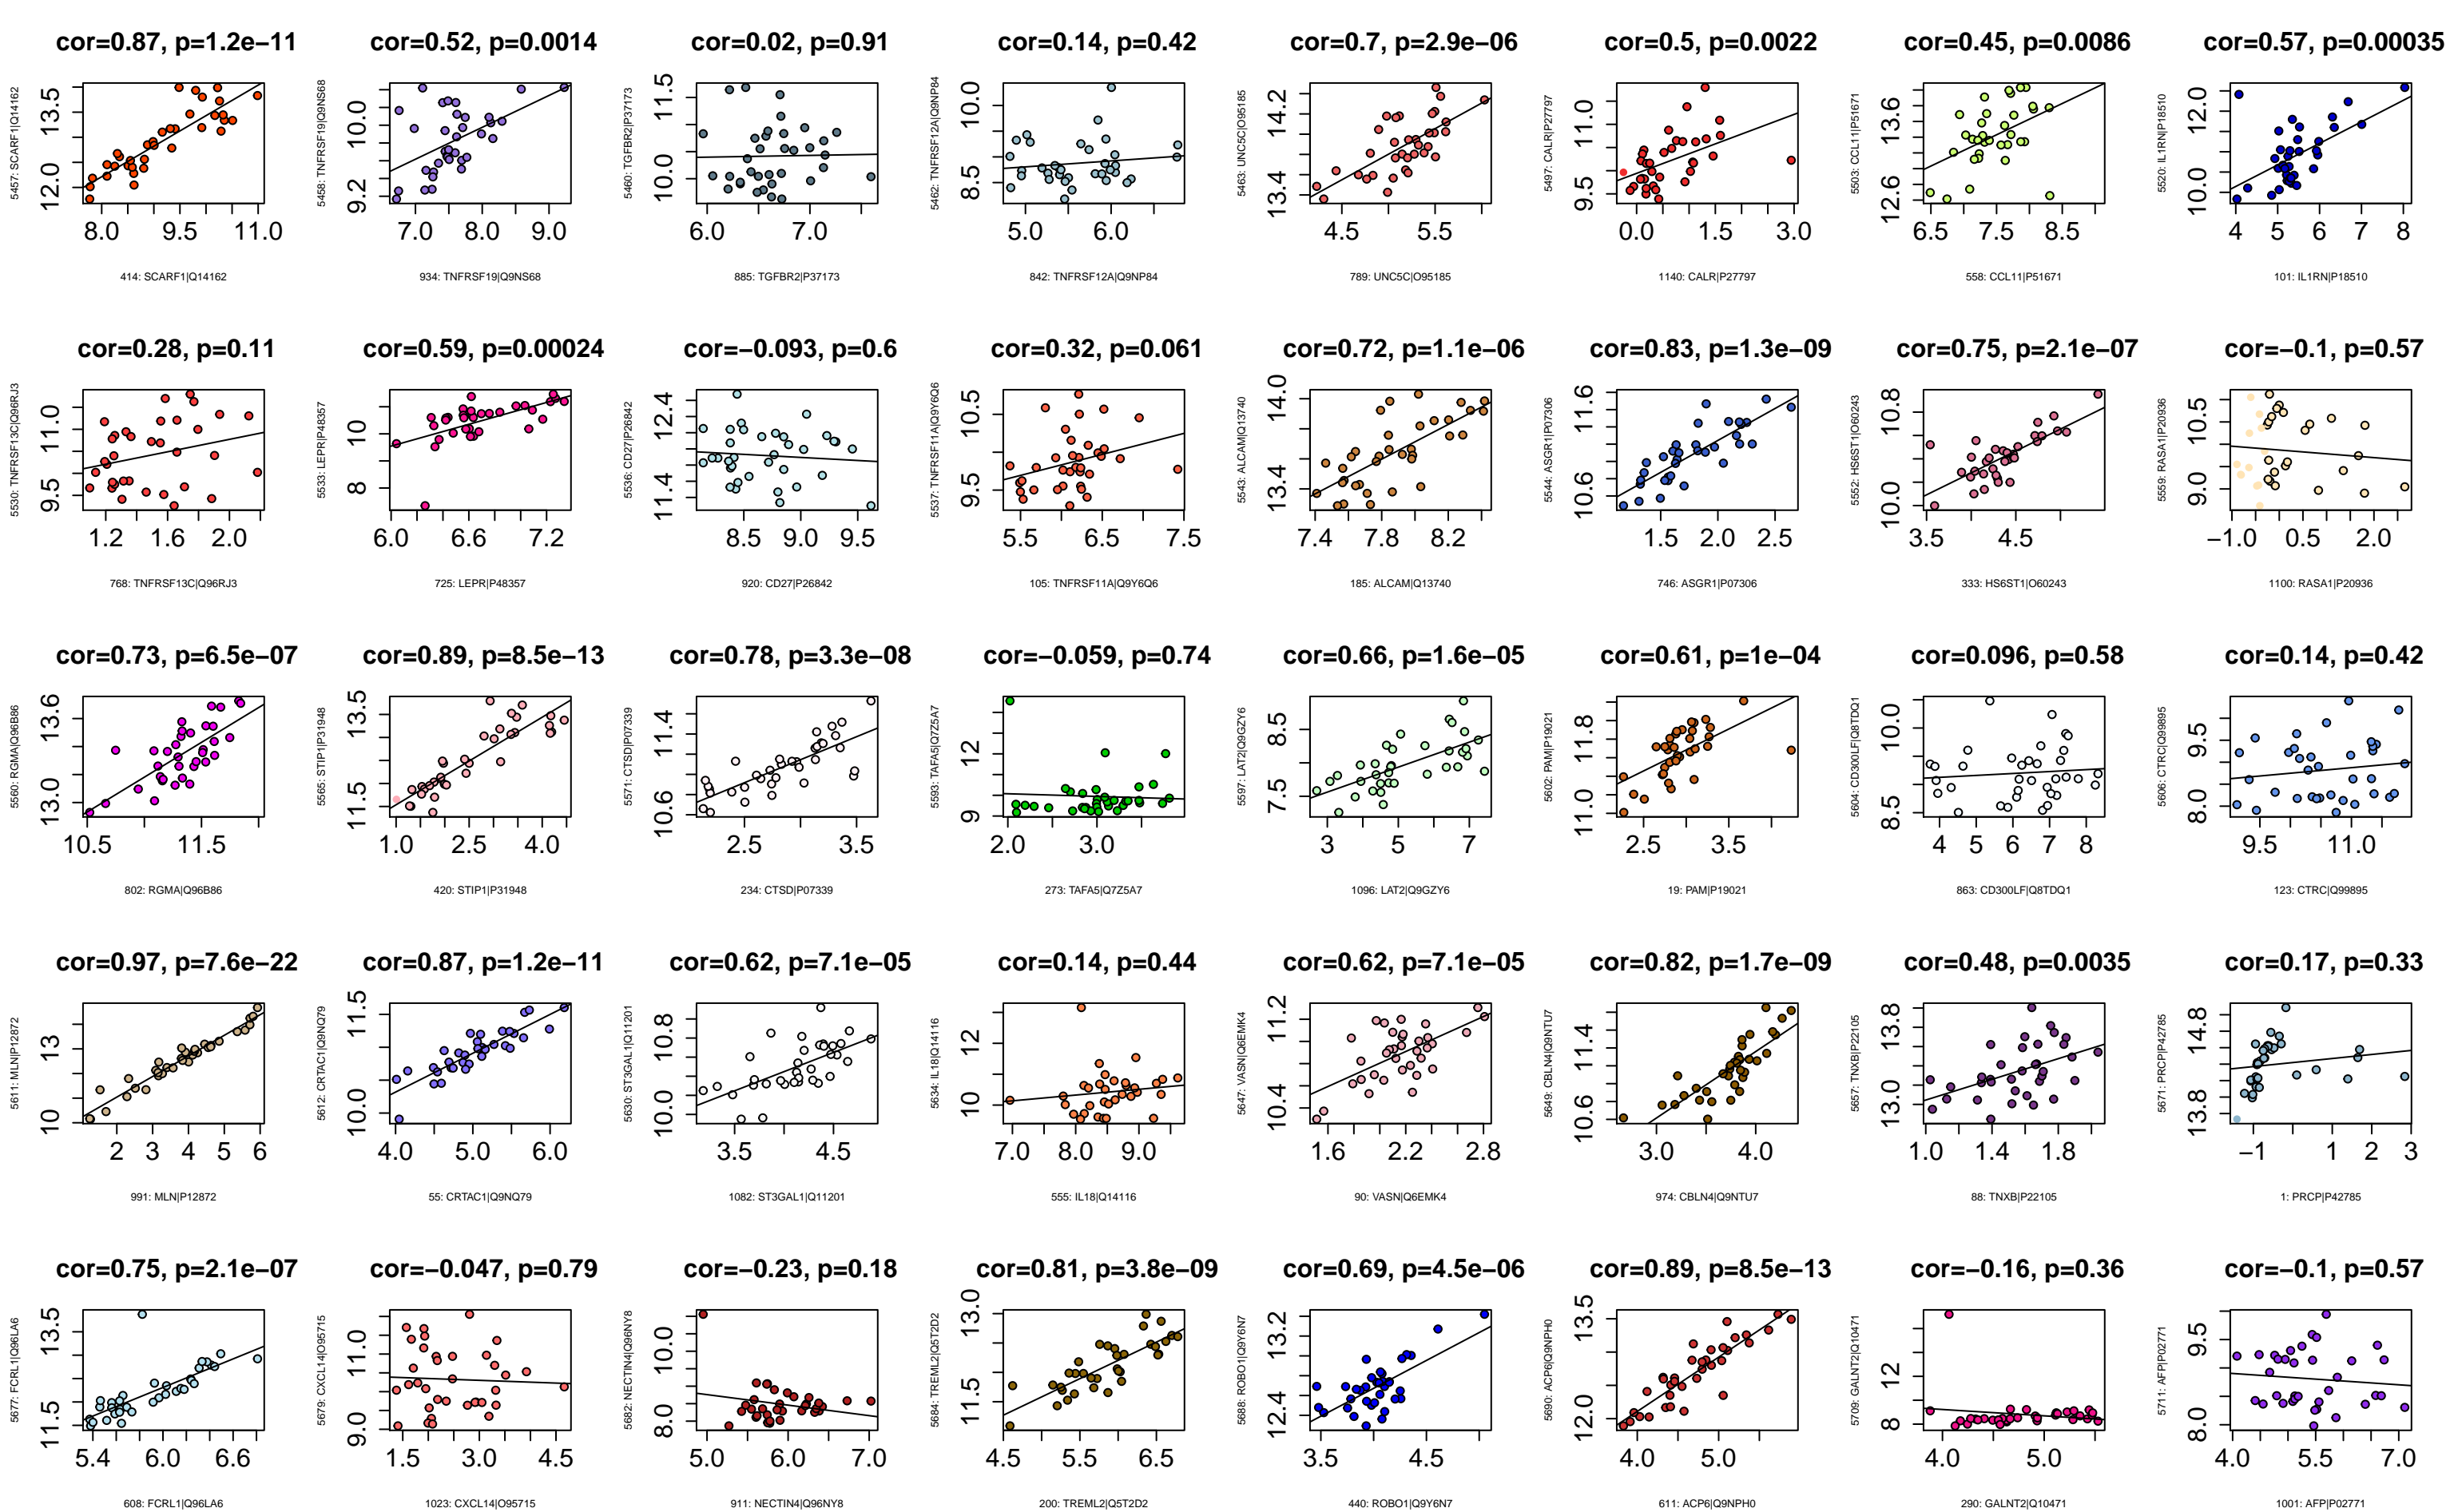

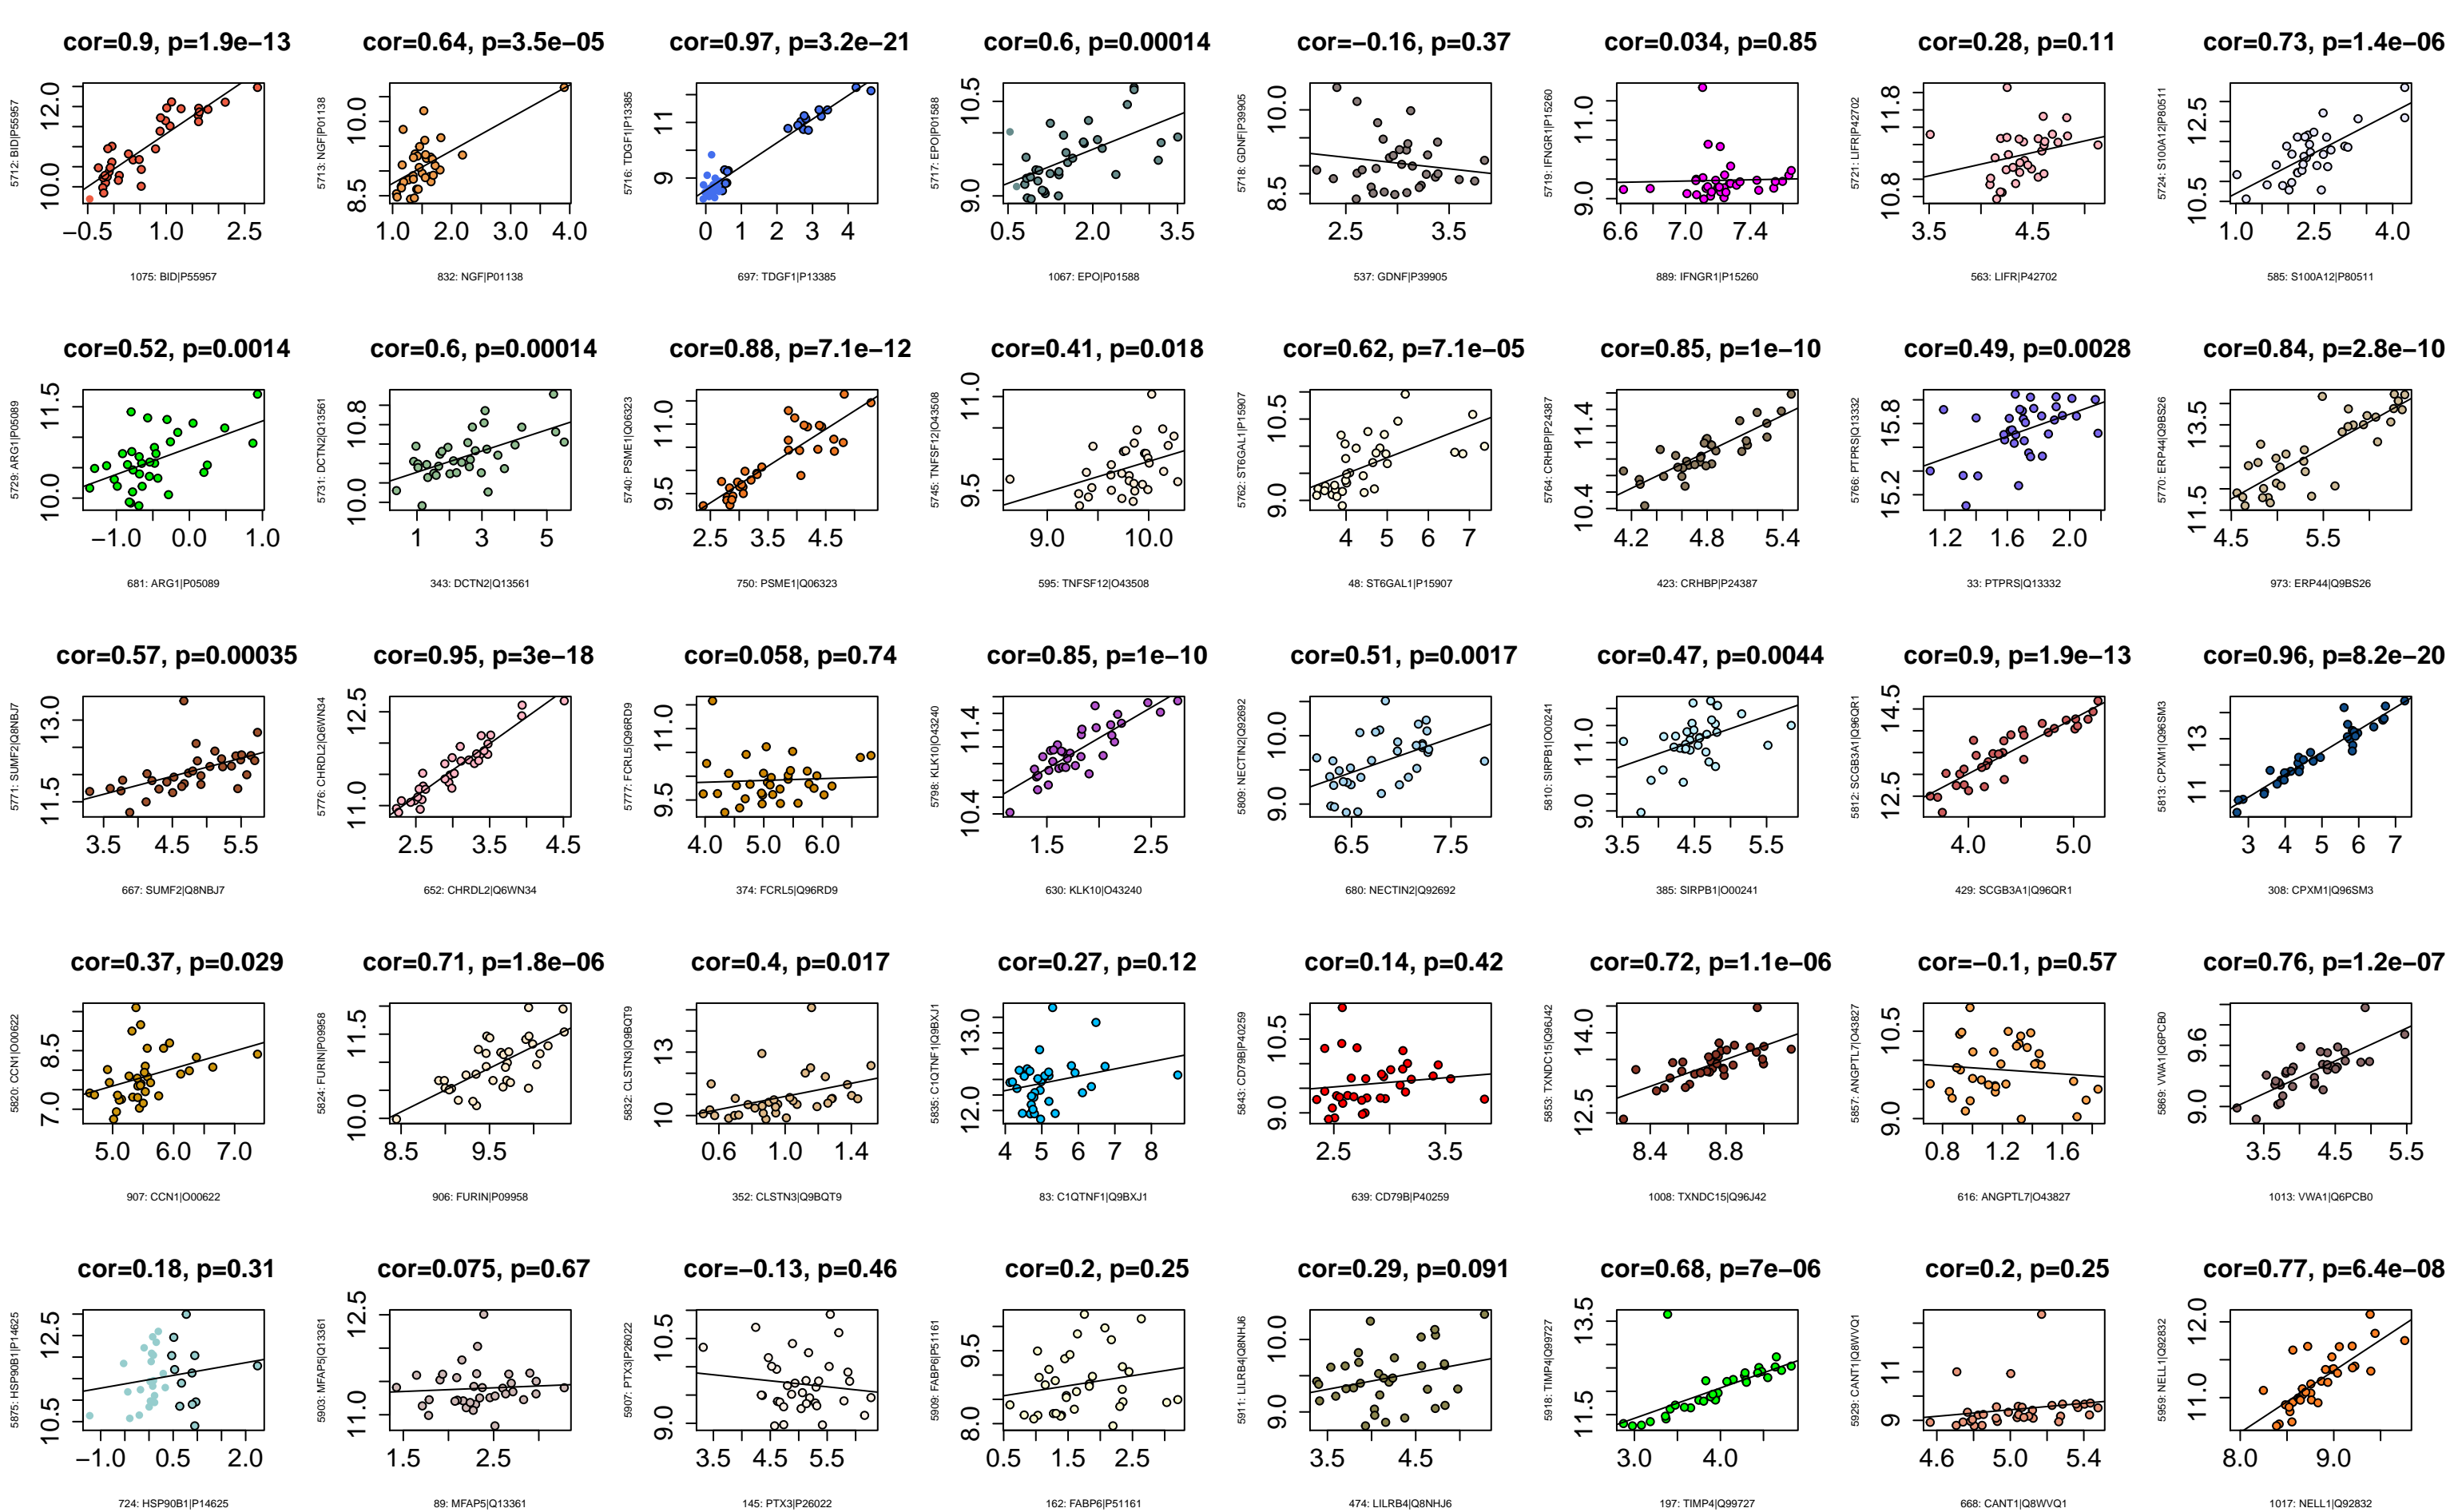

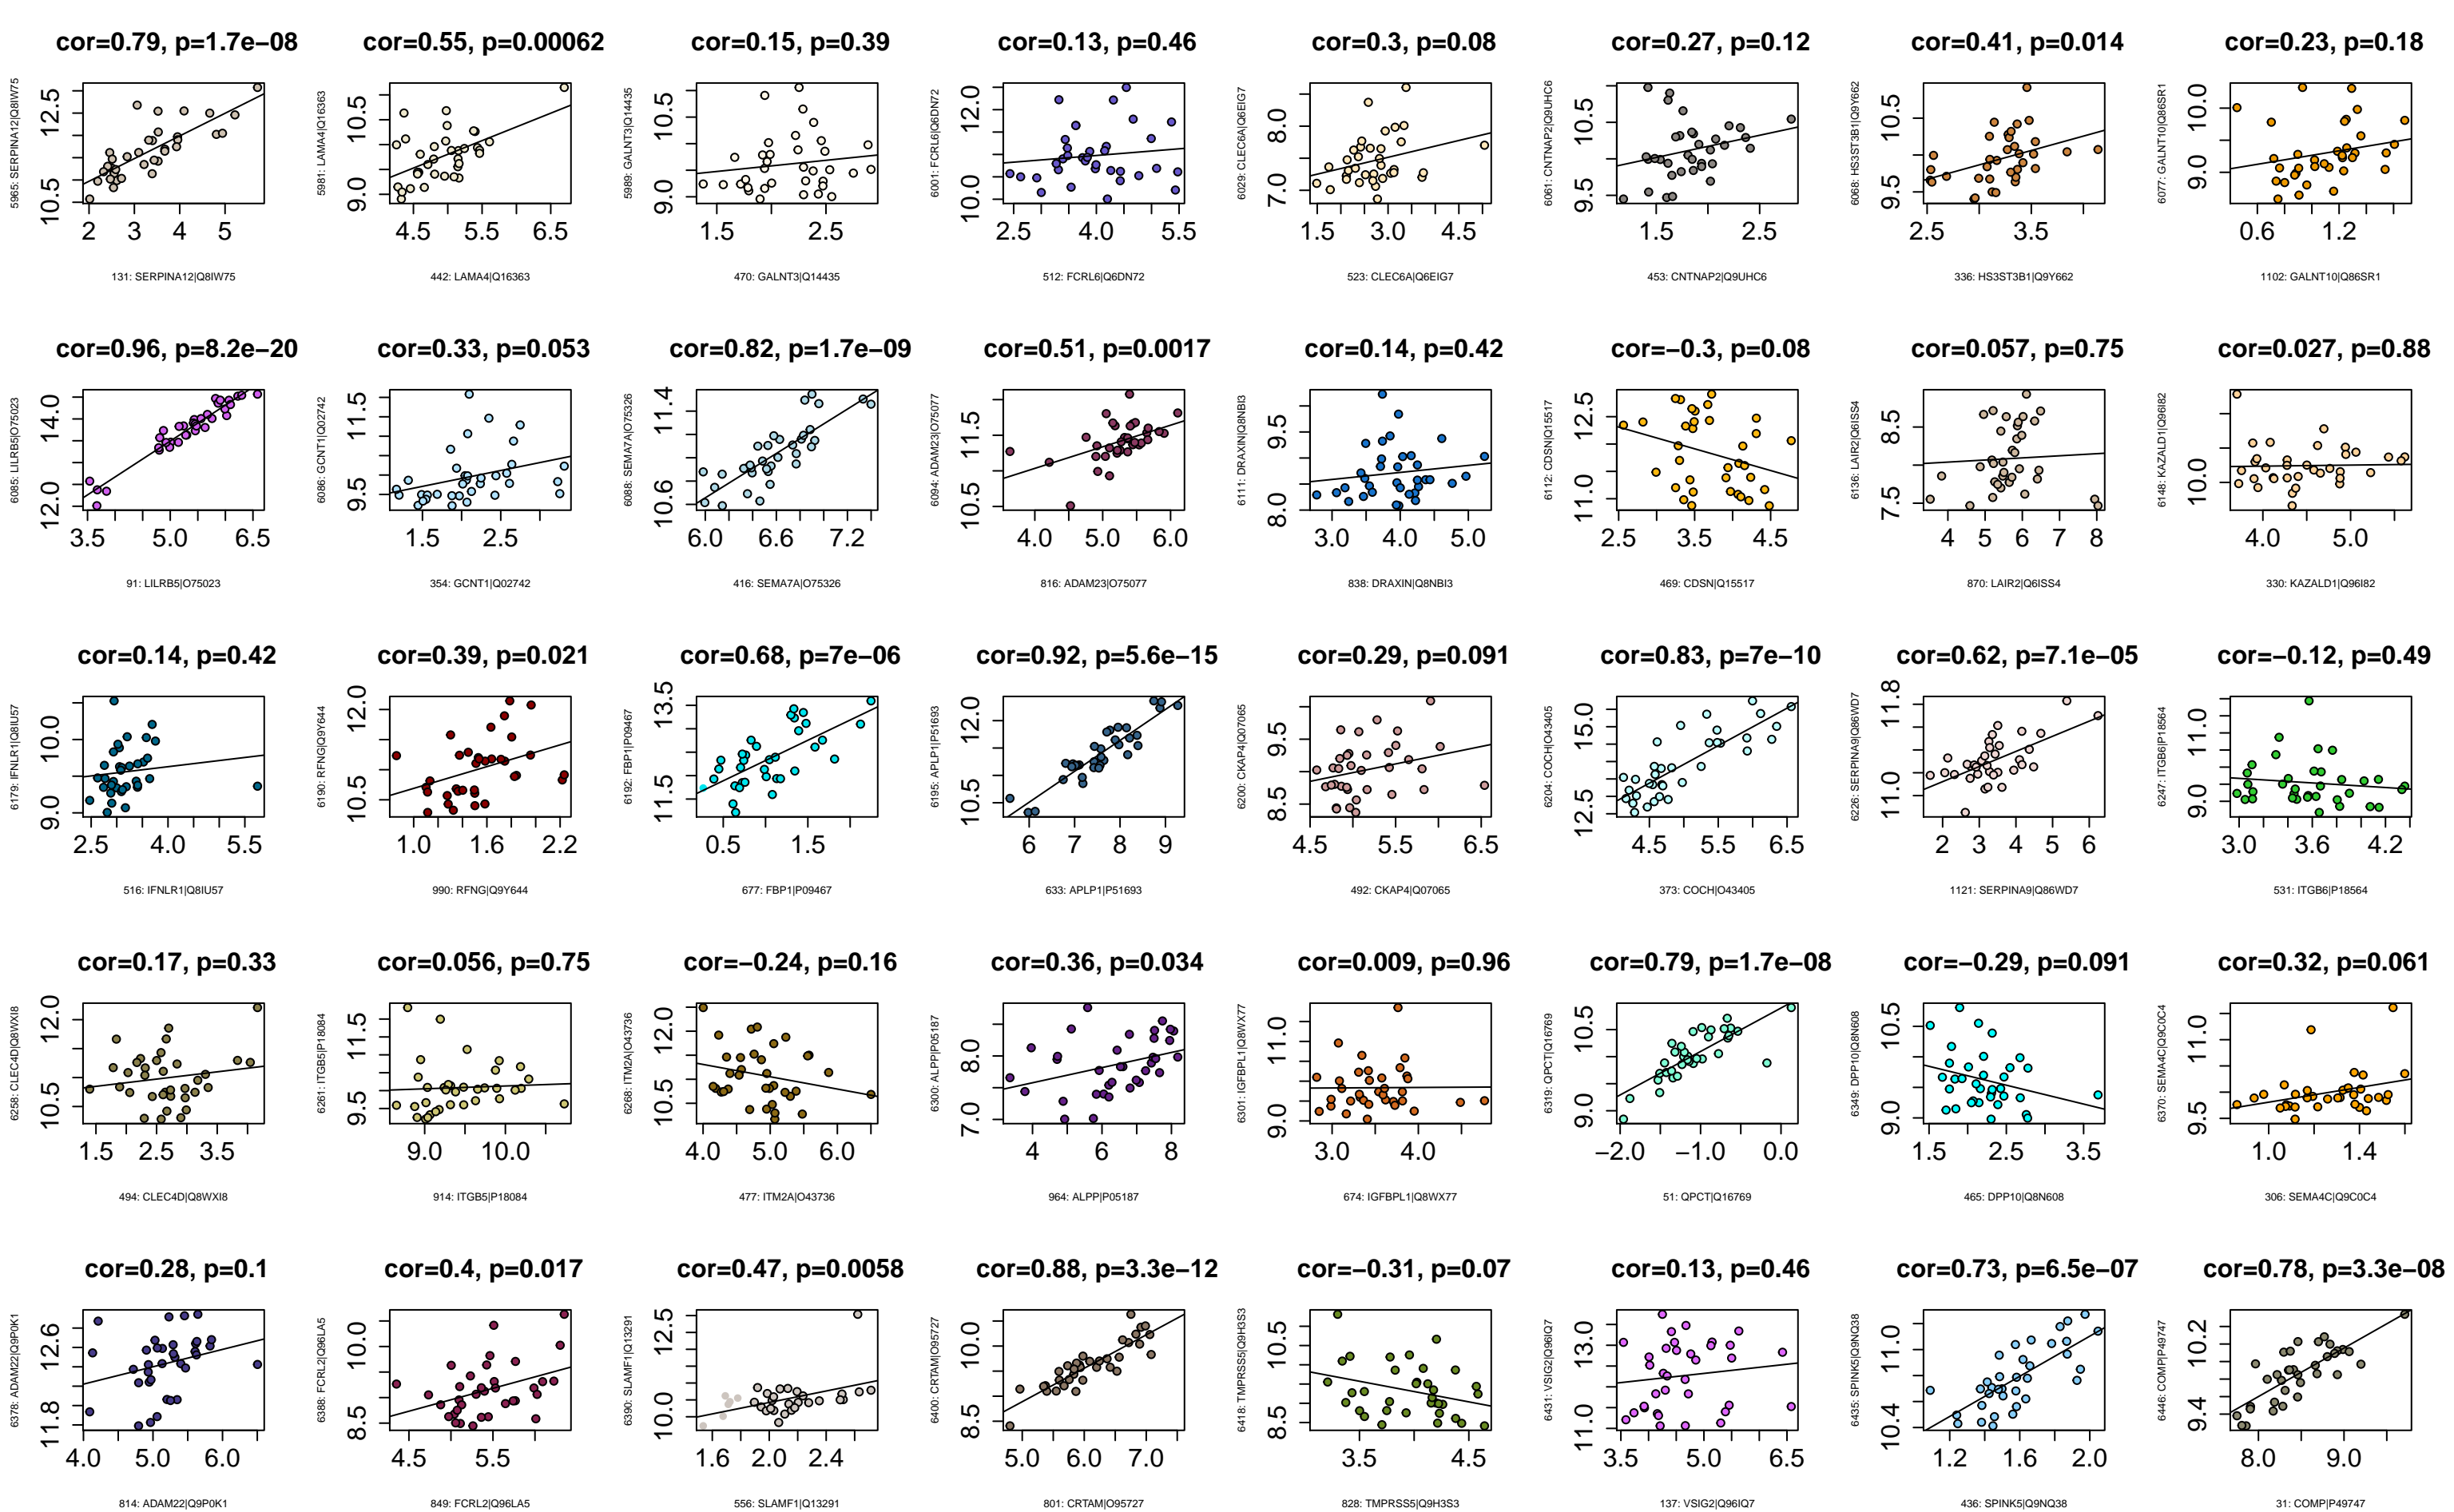

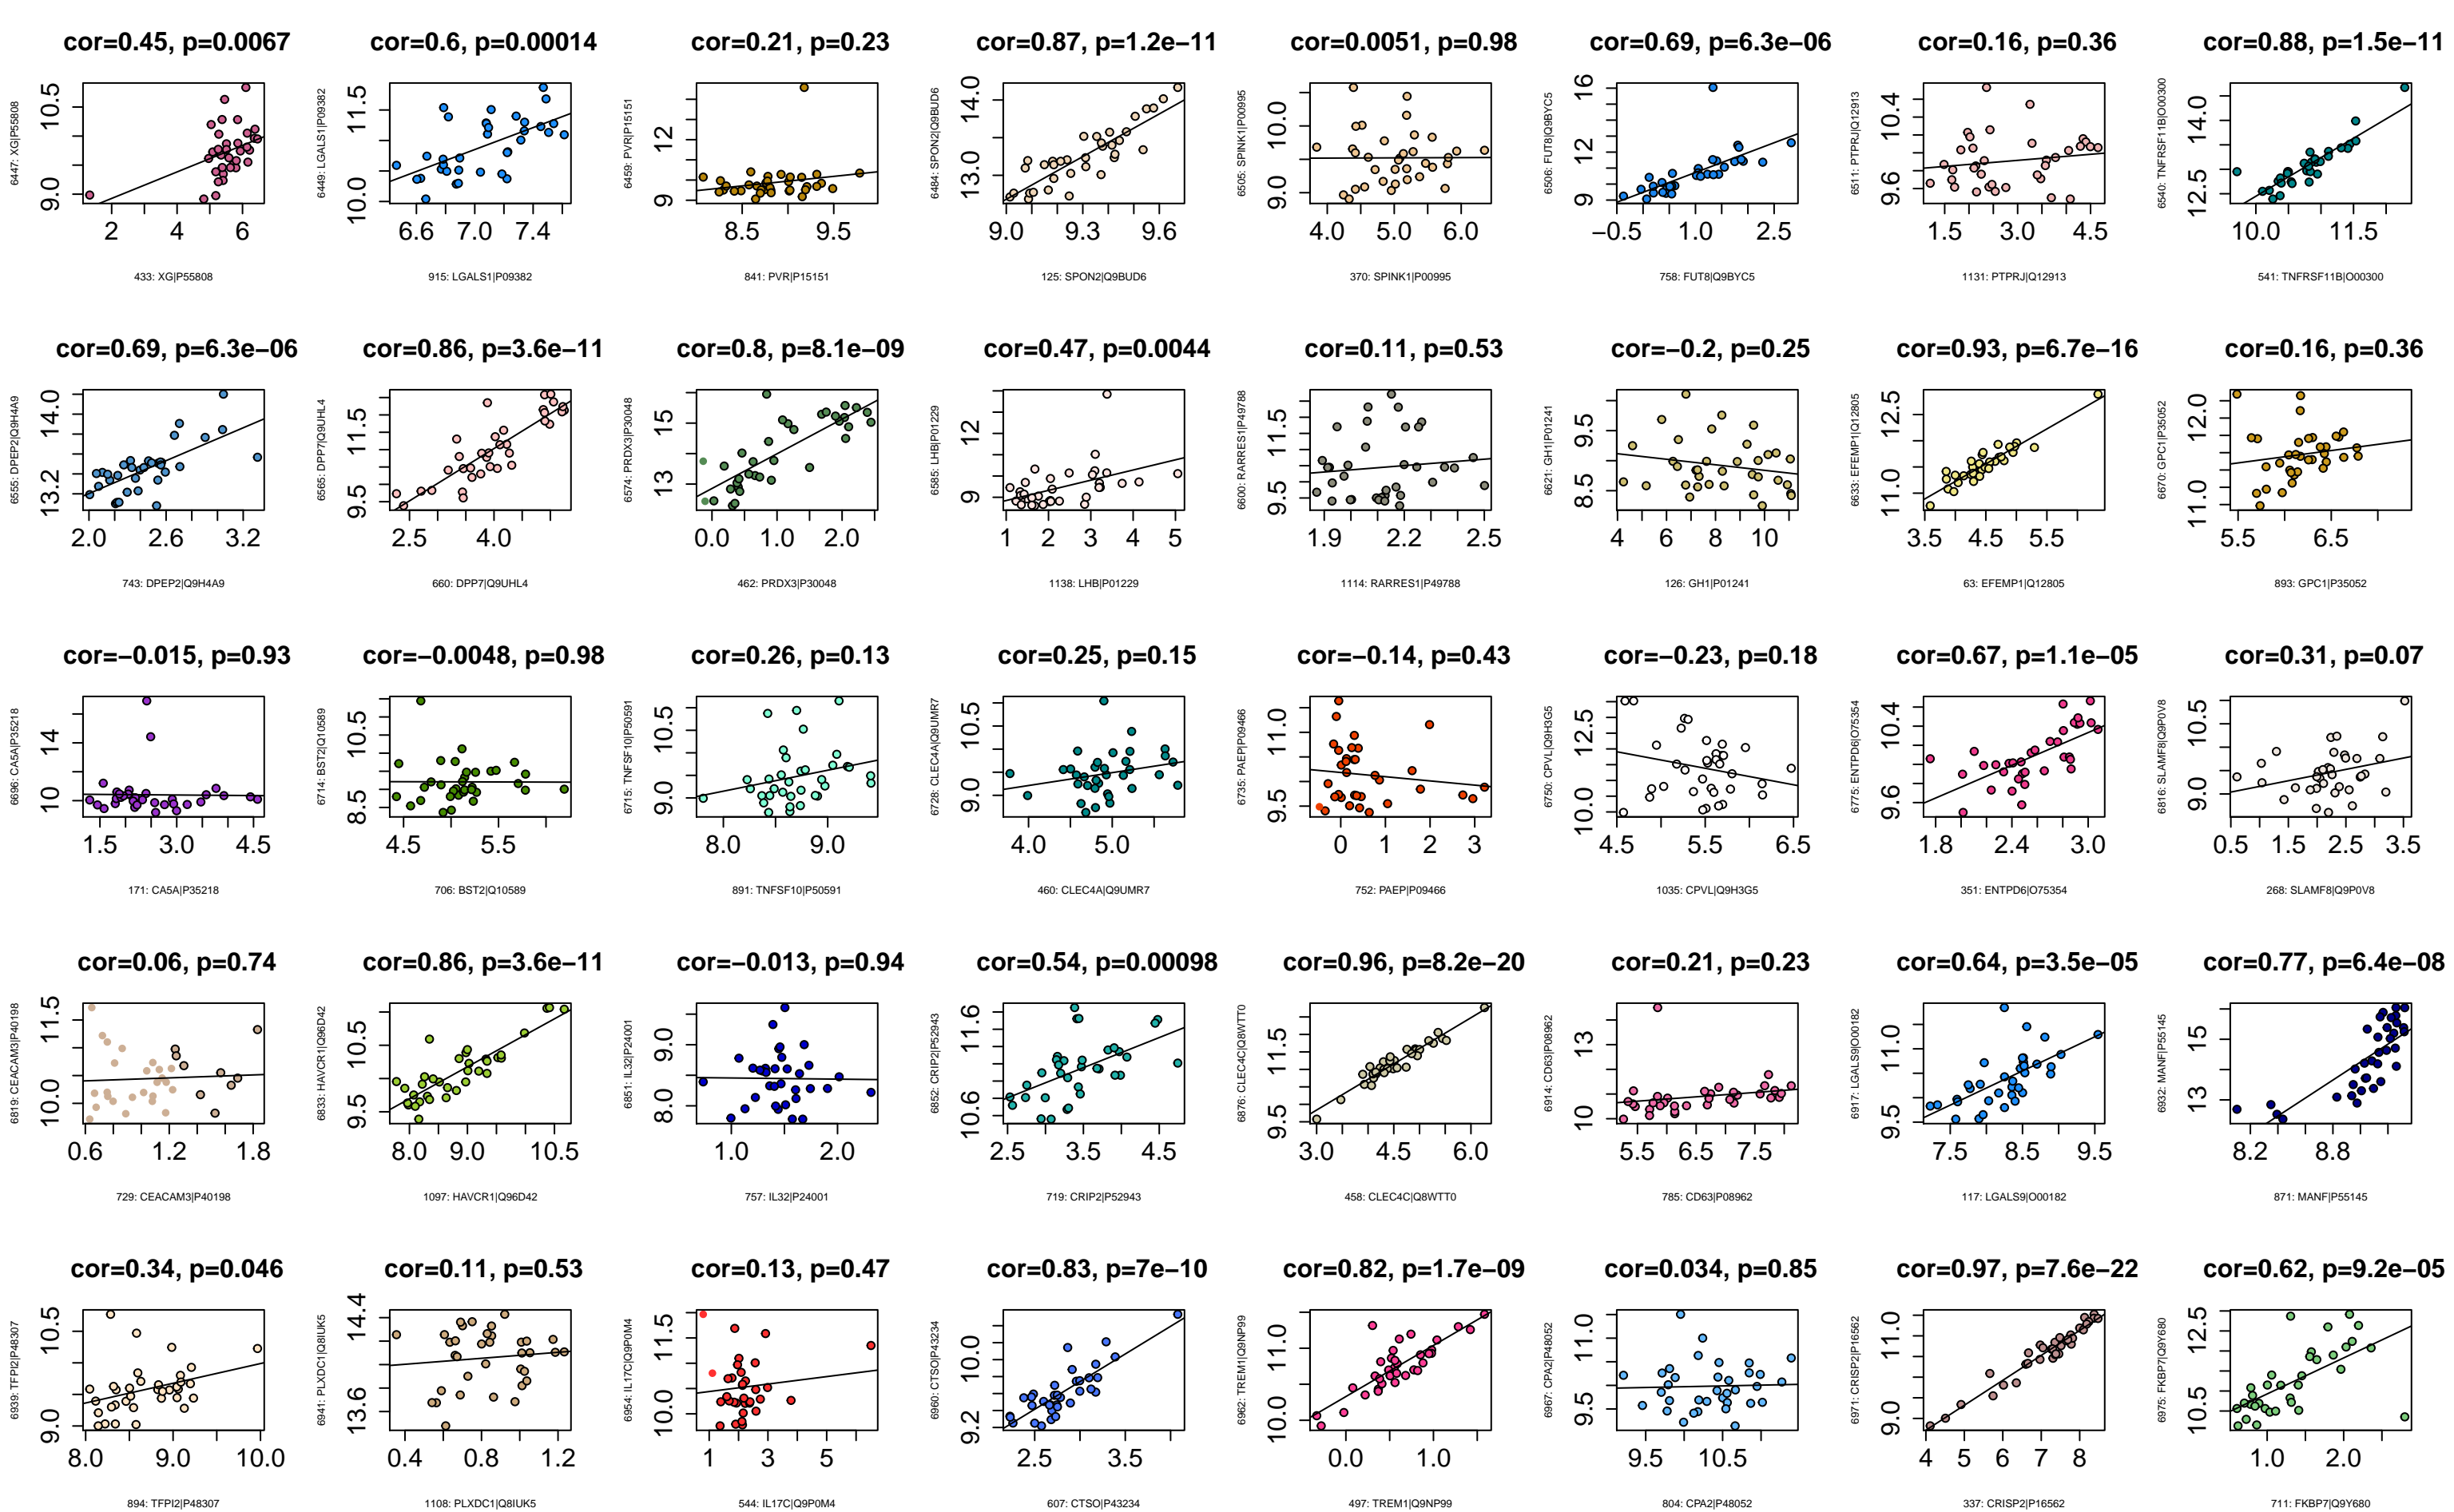

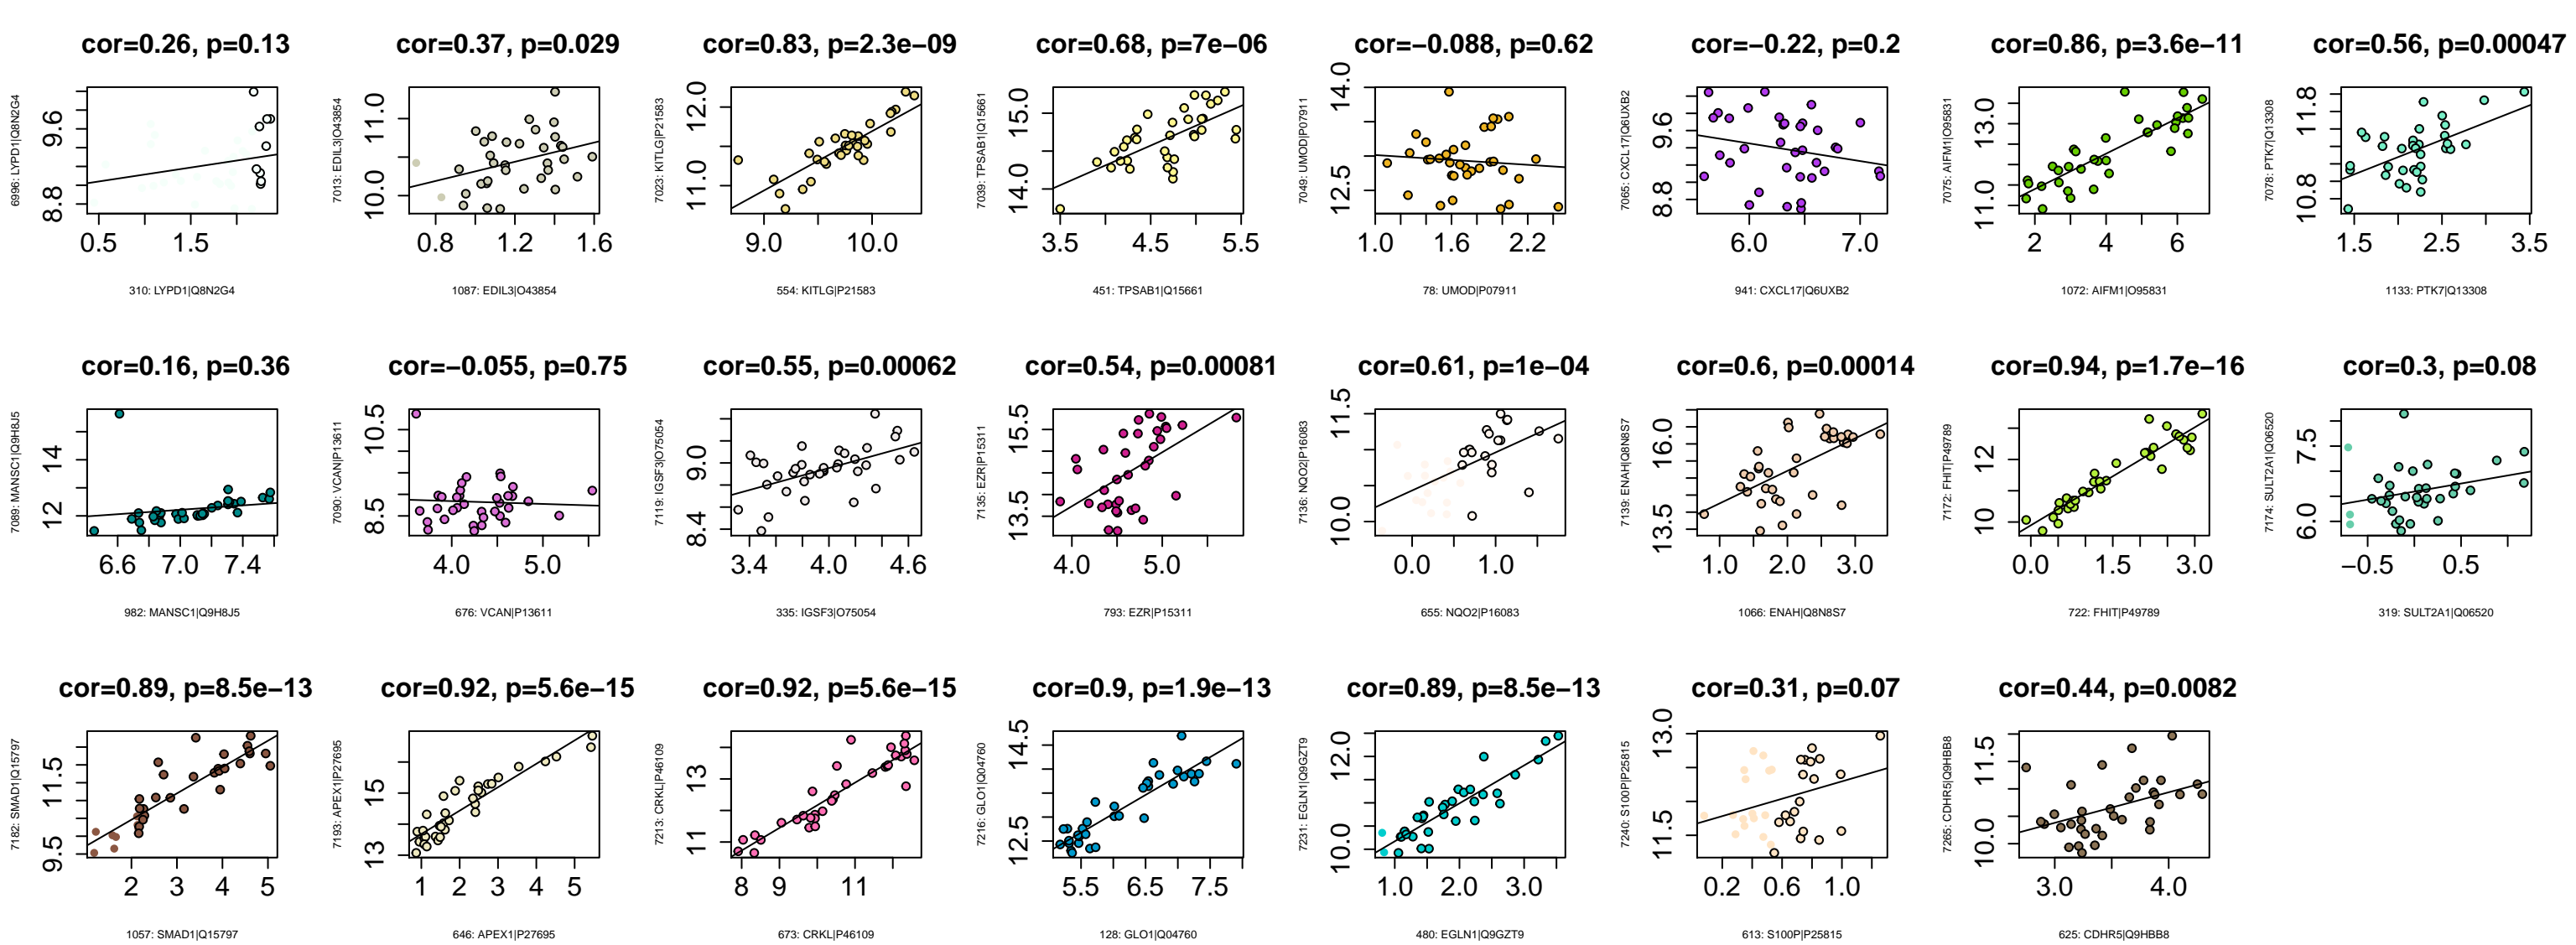



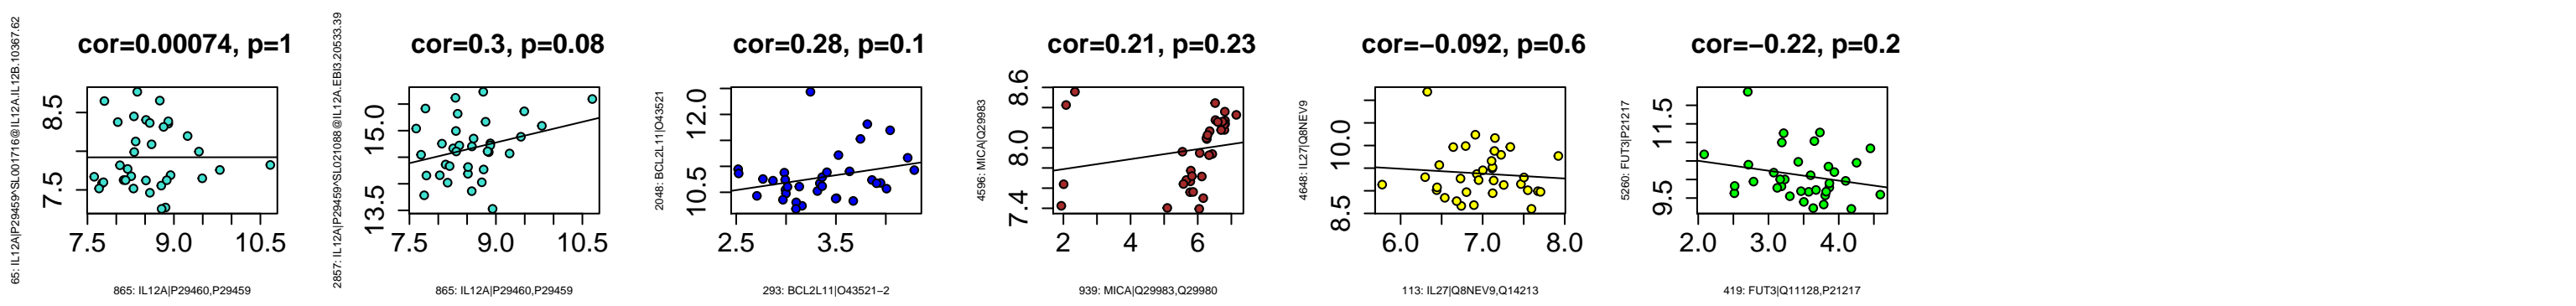

# Ontology Types

- Biological Process
- Molecular Function
- Cellular Component

**M1 turquoise**

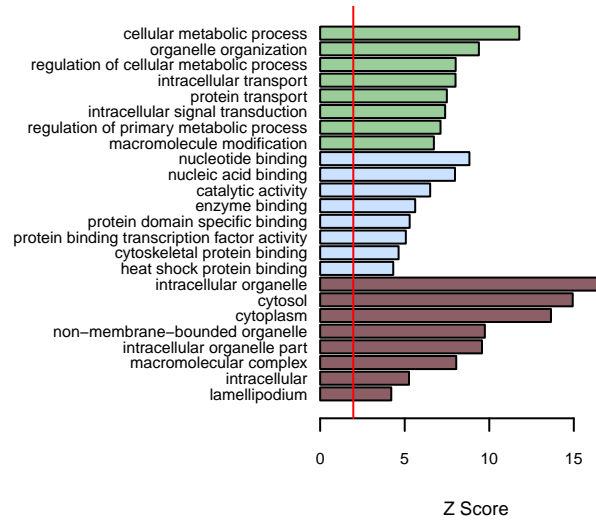

**M2 blue**

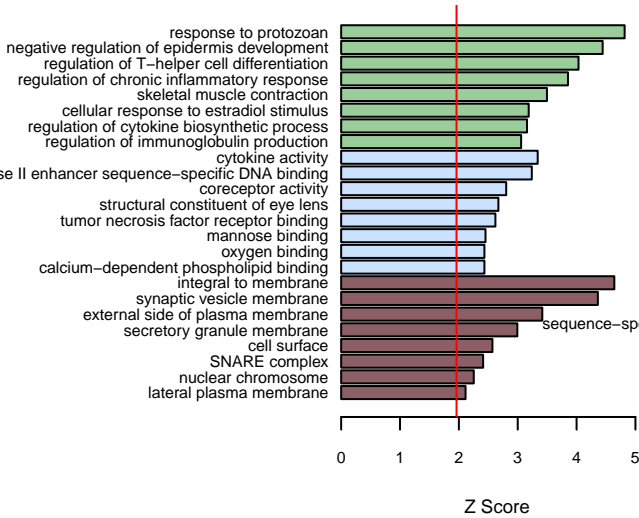

**M3 brown**

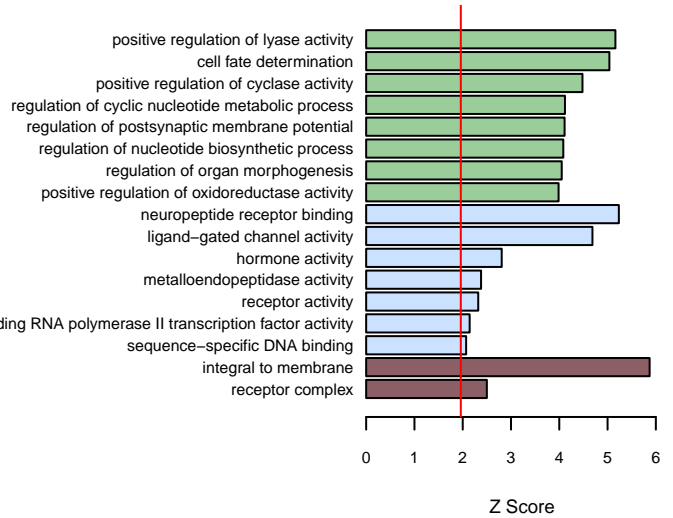

**M4 yellow**

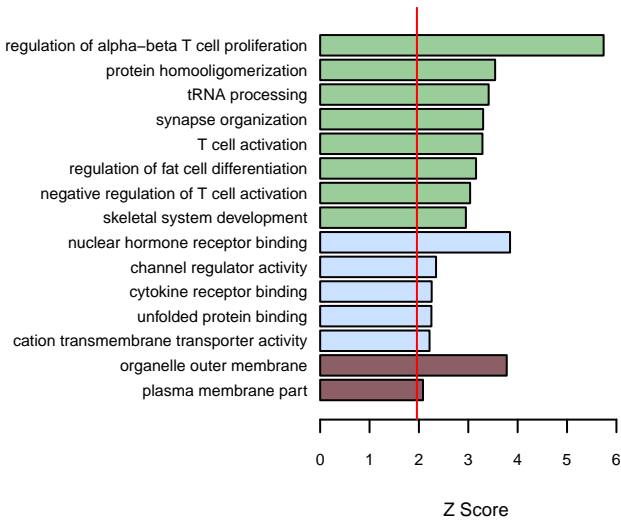

**M5 green**

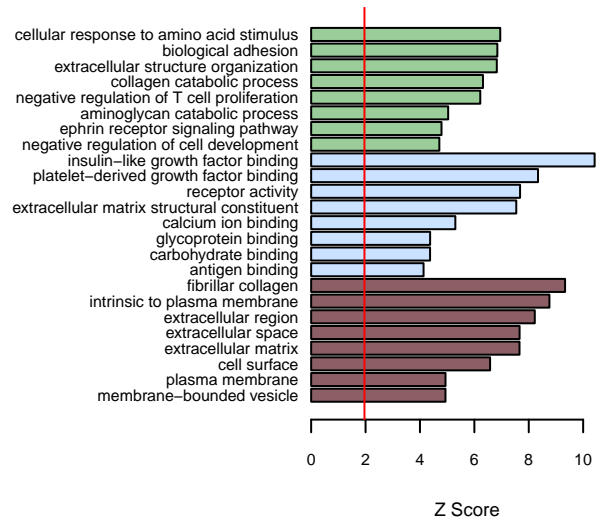

**M6 red**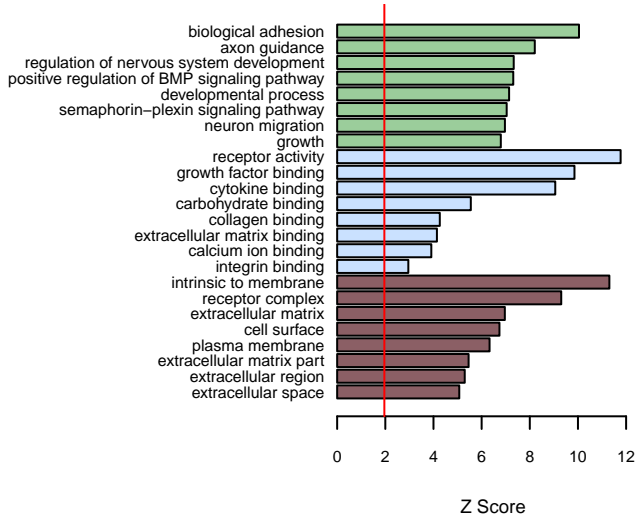**M7 black**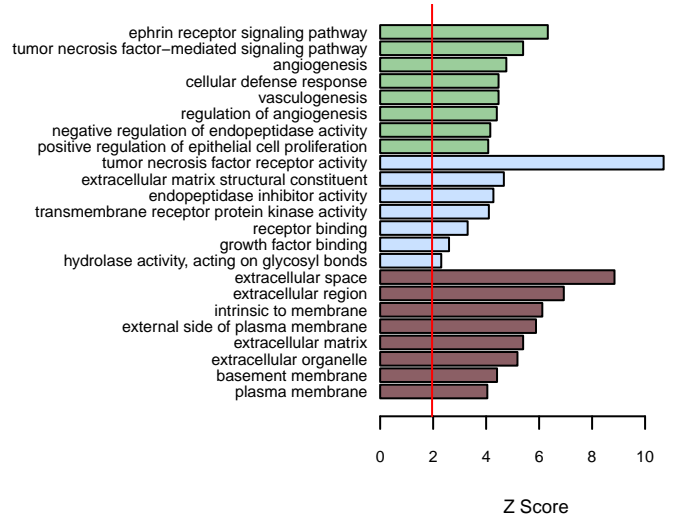**M8 pink**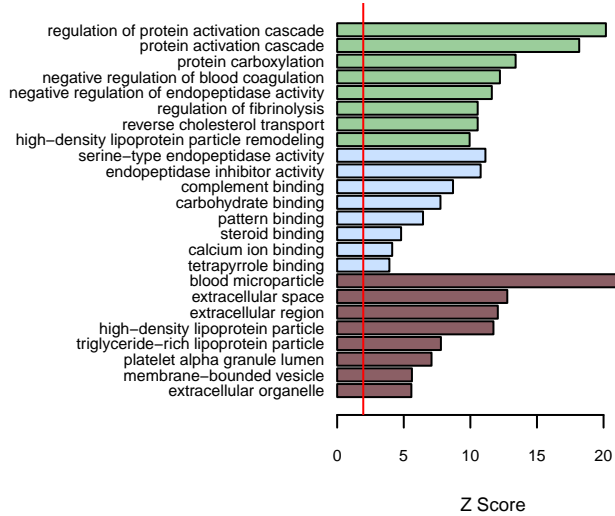**M9 magenta**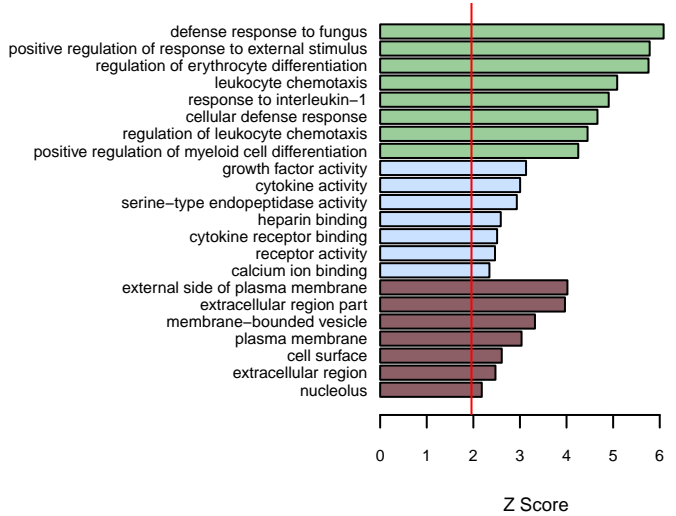**M10 purple**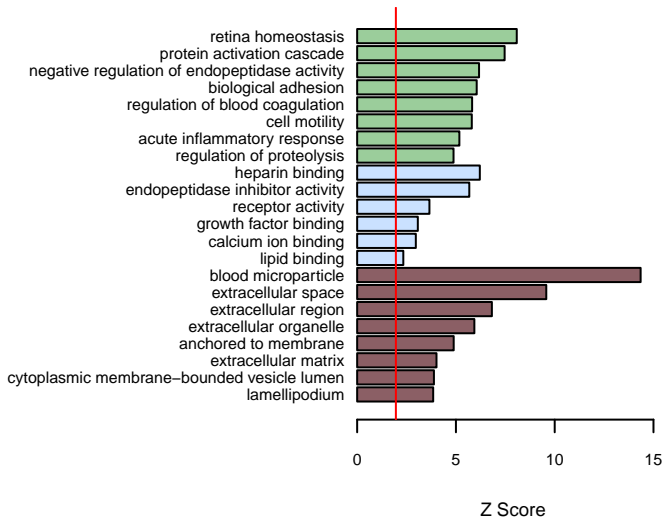**M11 greenyellow**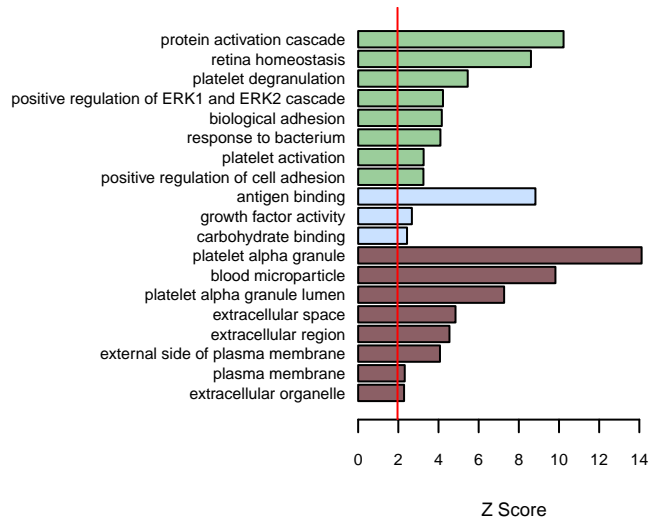

**M12 tan**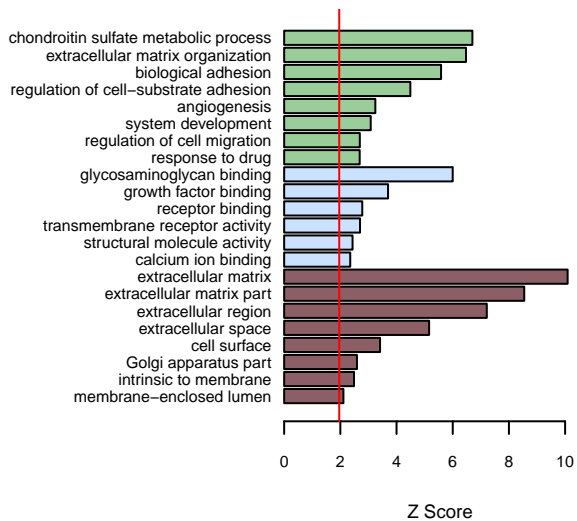**M13 salmon**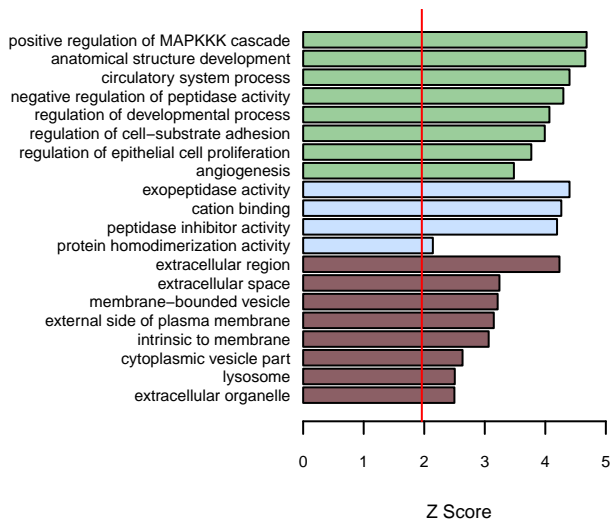**M14 cyan**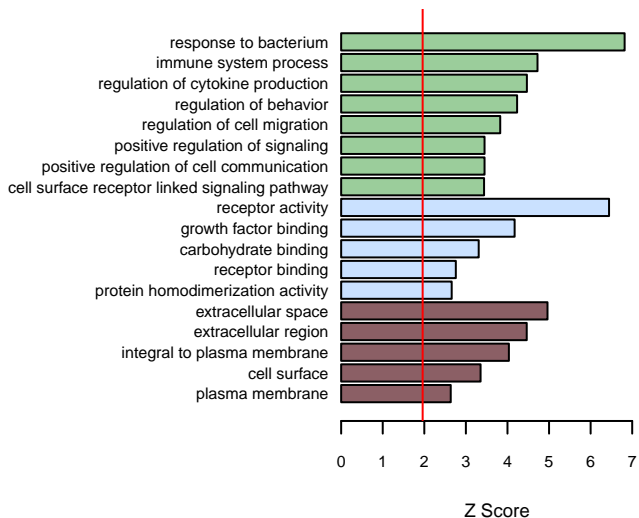**M15 midnightblue**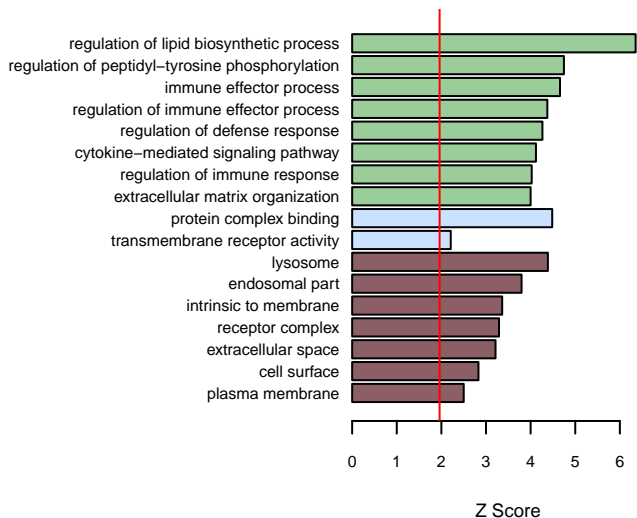**M16 lightcyan**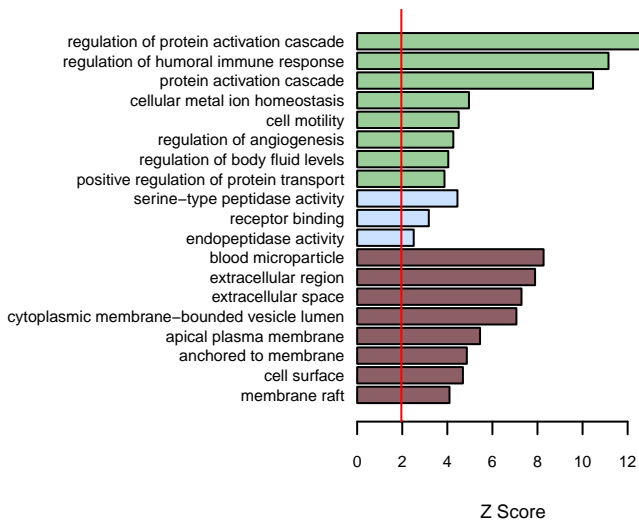**M17 grey60**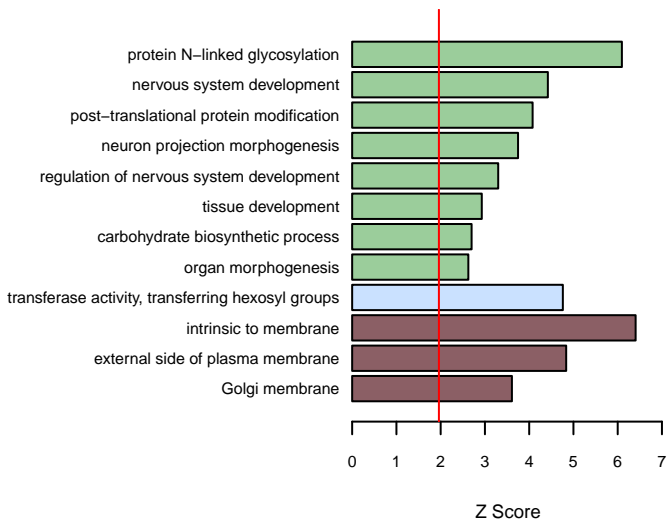

**M18 lightgreen**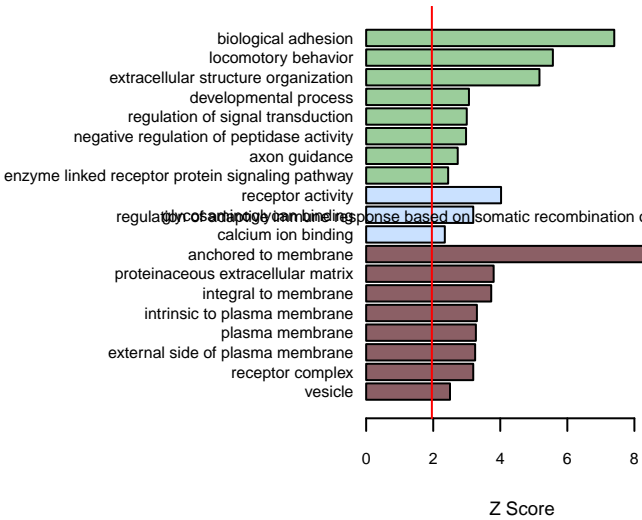**M19 lightyellow**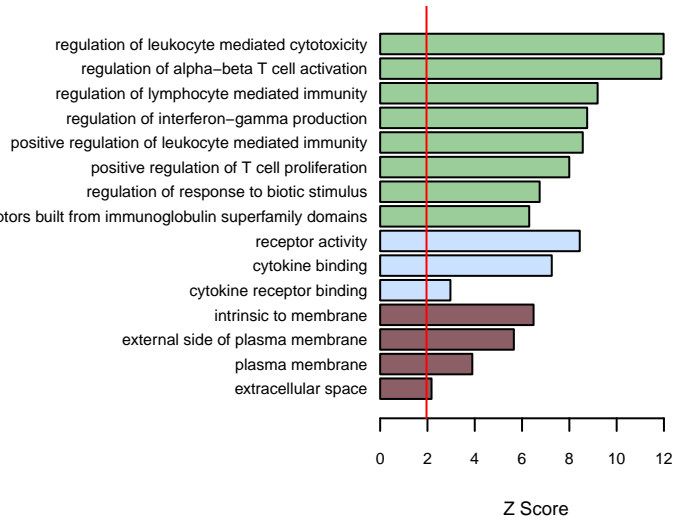**M20 royalblue**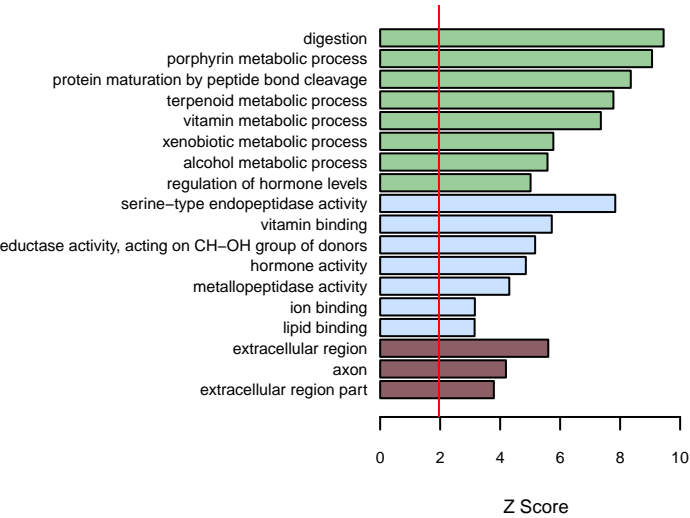**M21 darkred**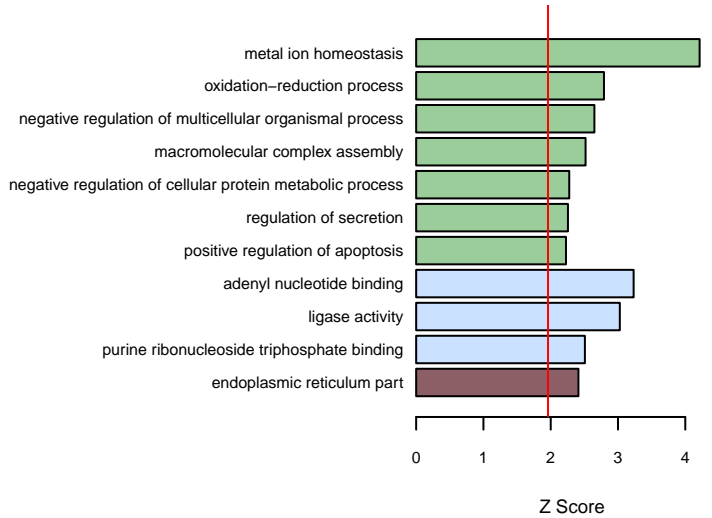**M22 darkgreen**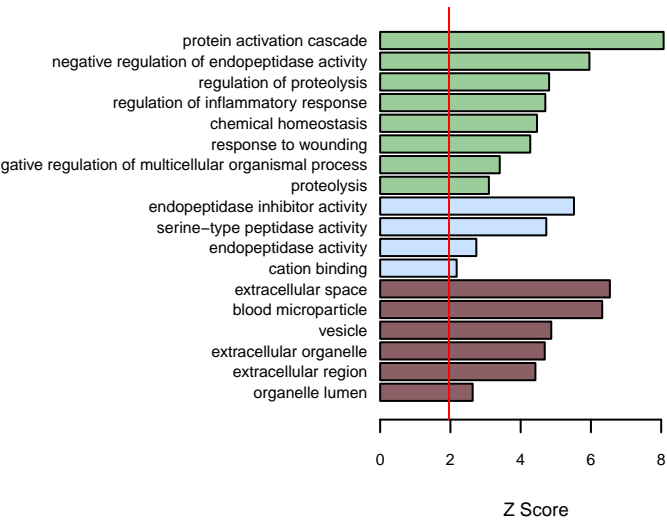**M23 darkturquoise**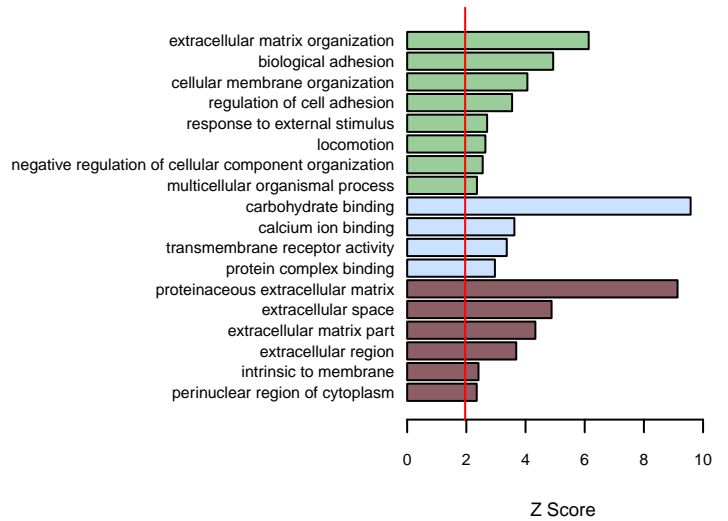

**M24 darkgrey**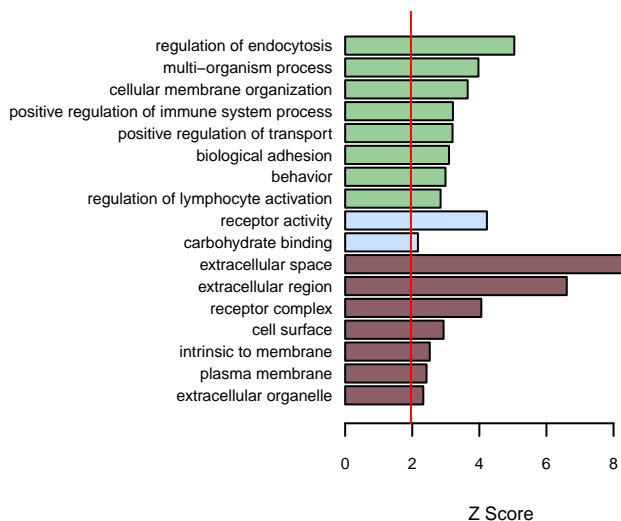**M25 orange**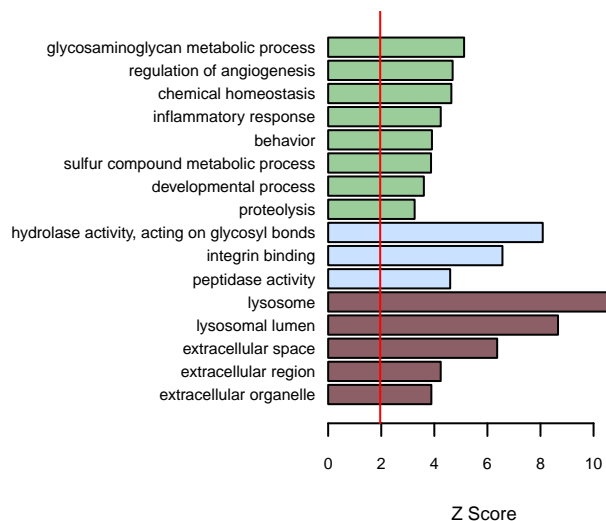**M26 darkorange**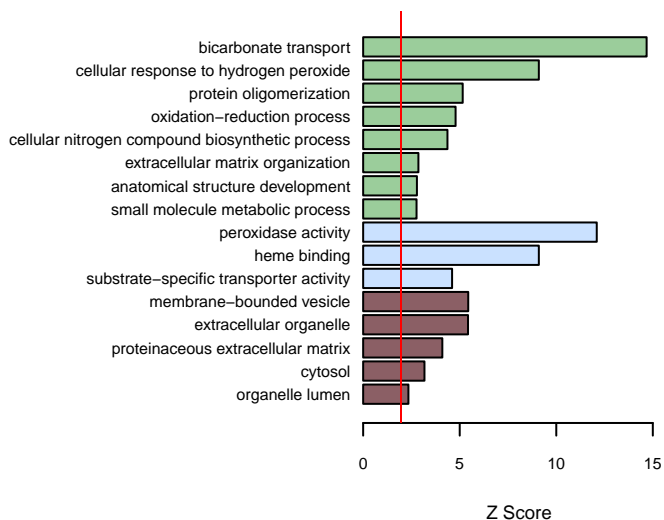**M27 white**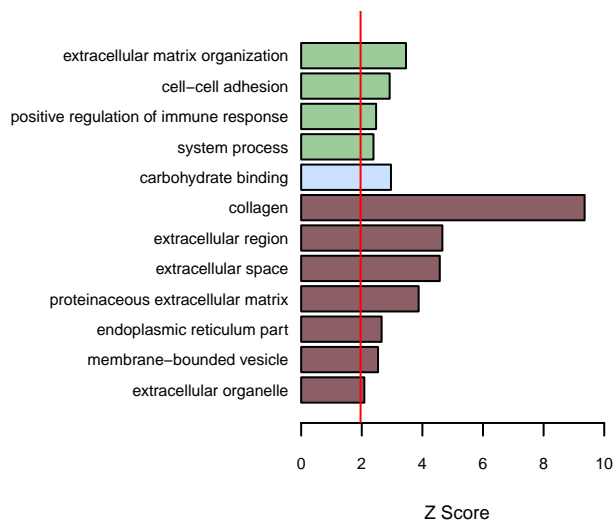**M28 skyblue**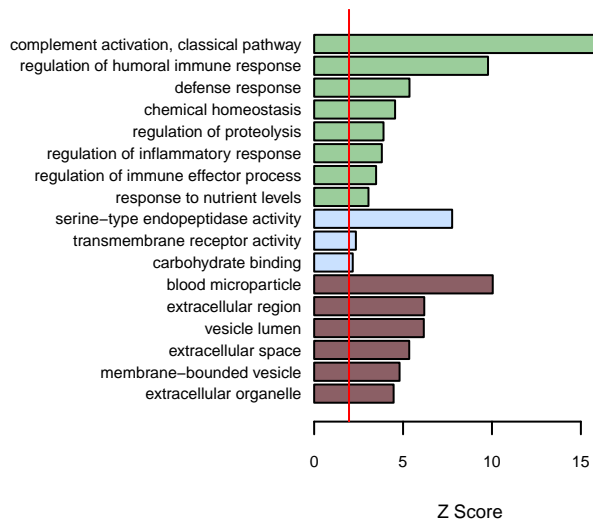**M29 saddlebrown**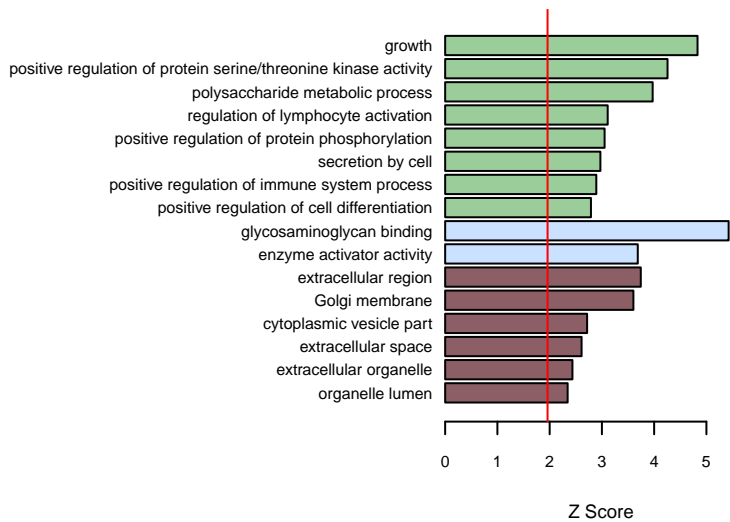

**M30 steelblue**

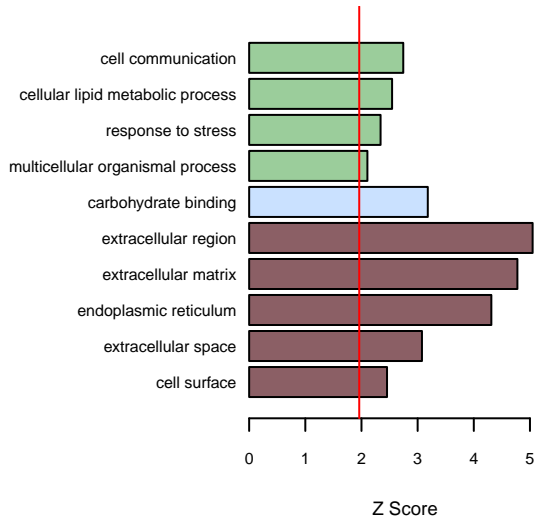

**M31 paleturquoise**

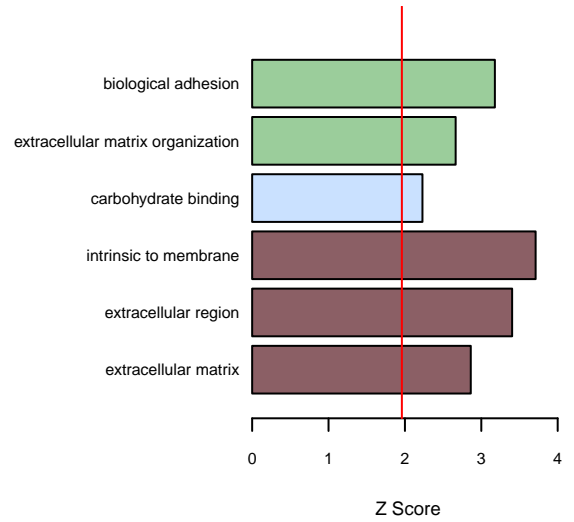

**M32 violet**

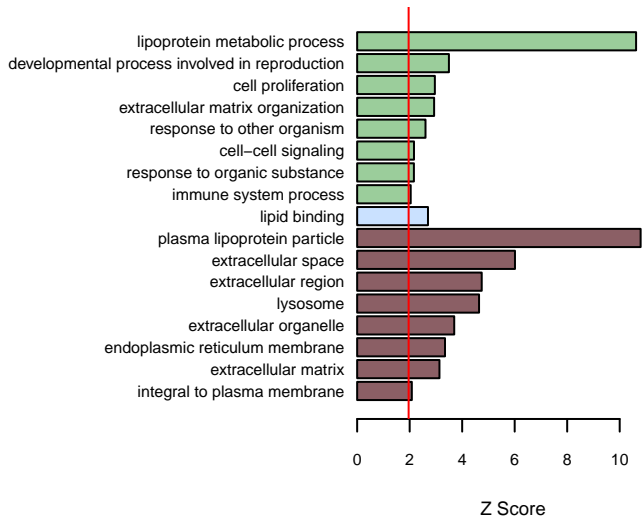

**M33 darkolivegreen**

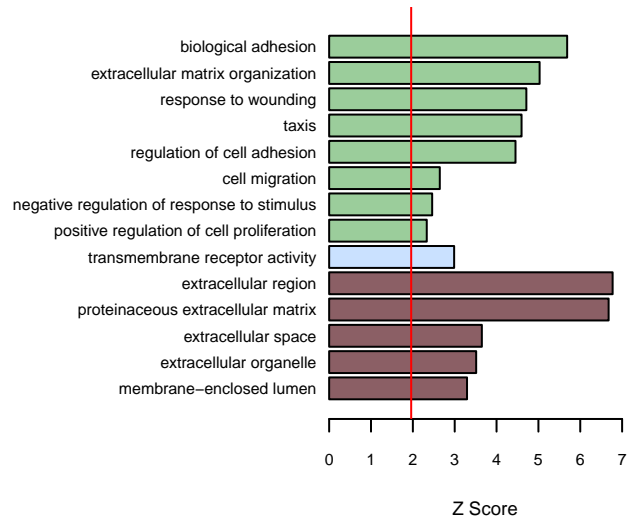

**M34 darkmagenta**

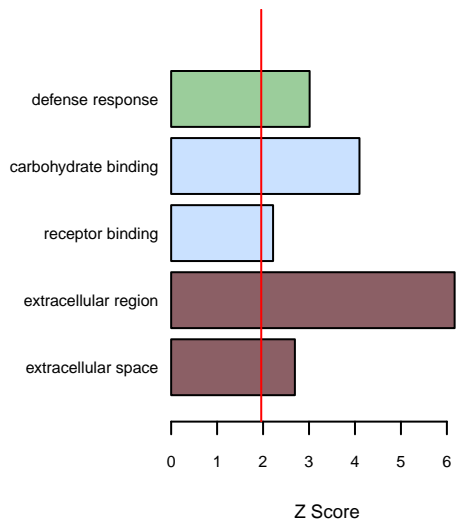

**M35 sienna3**

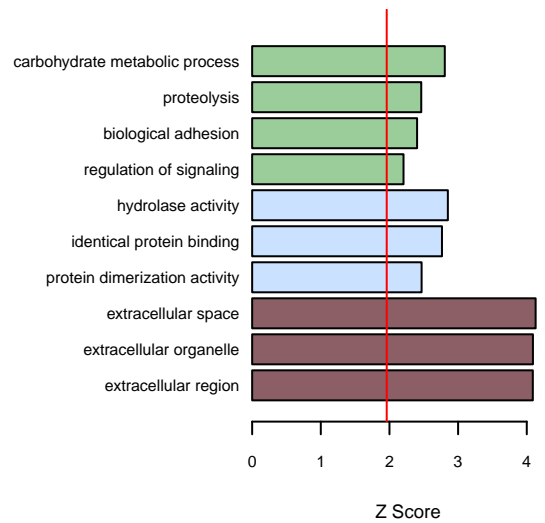





# M26 darkorange module: Bicarbonate Transport/Peroxidase

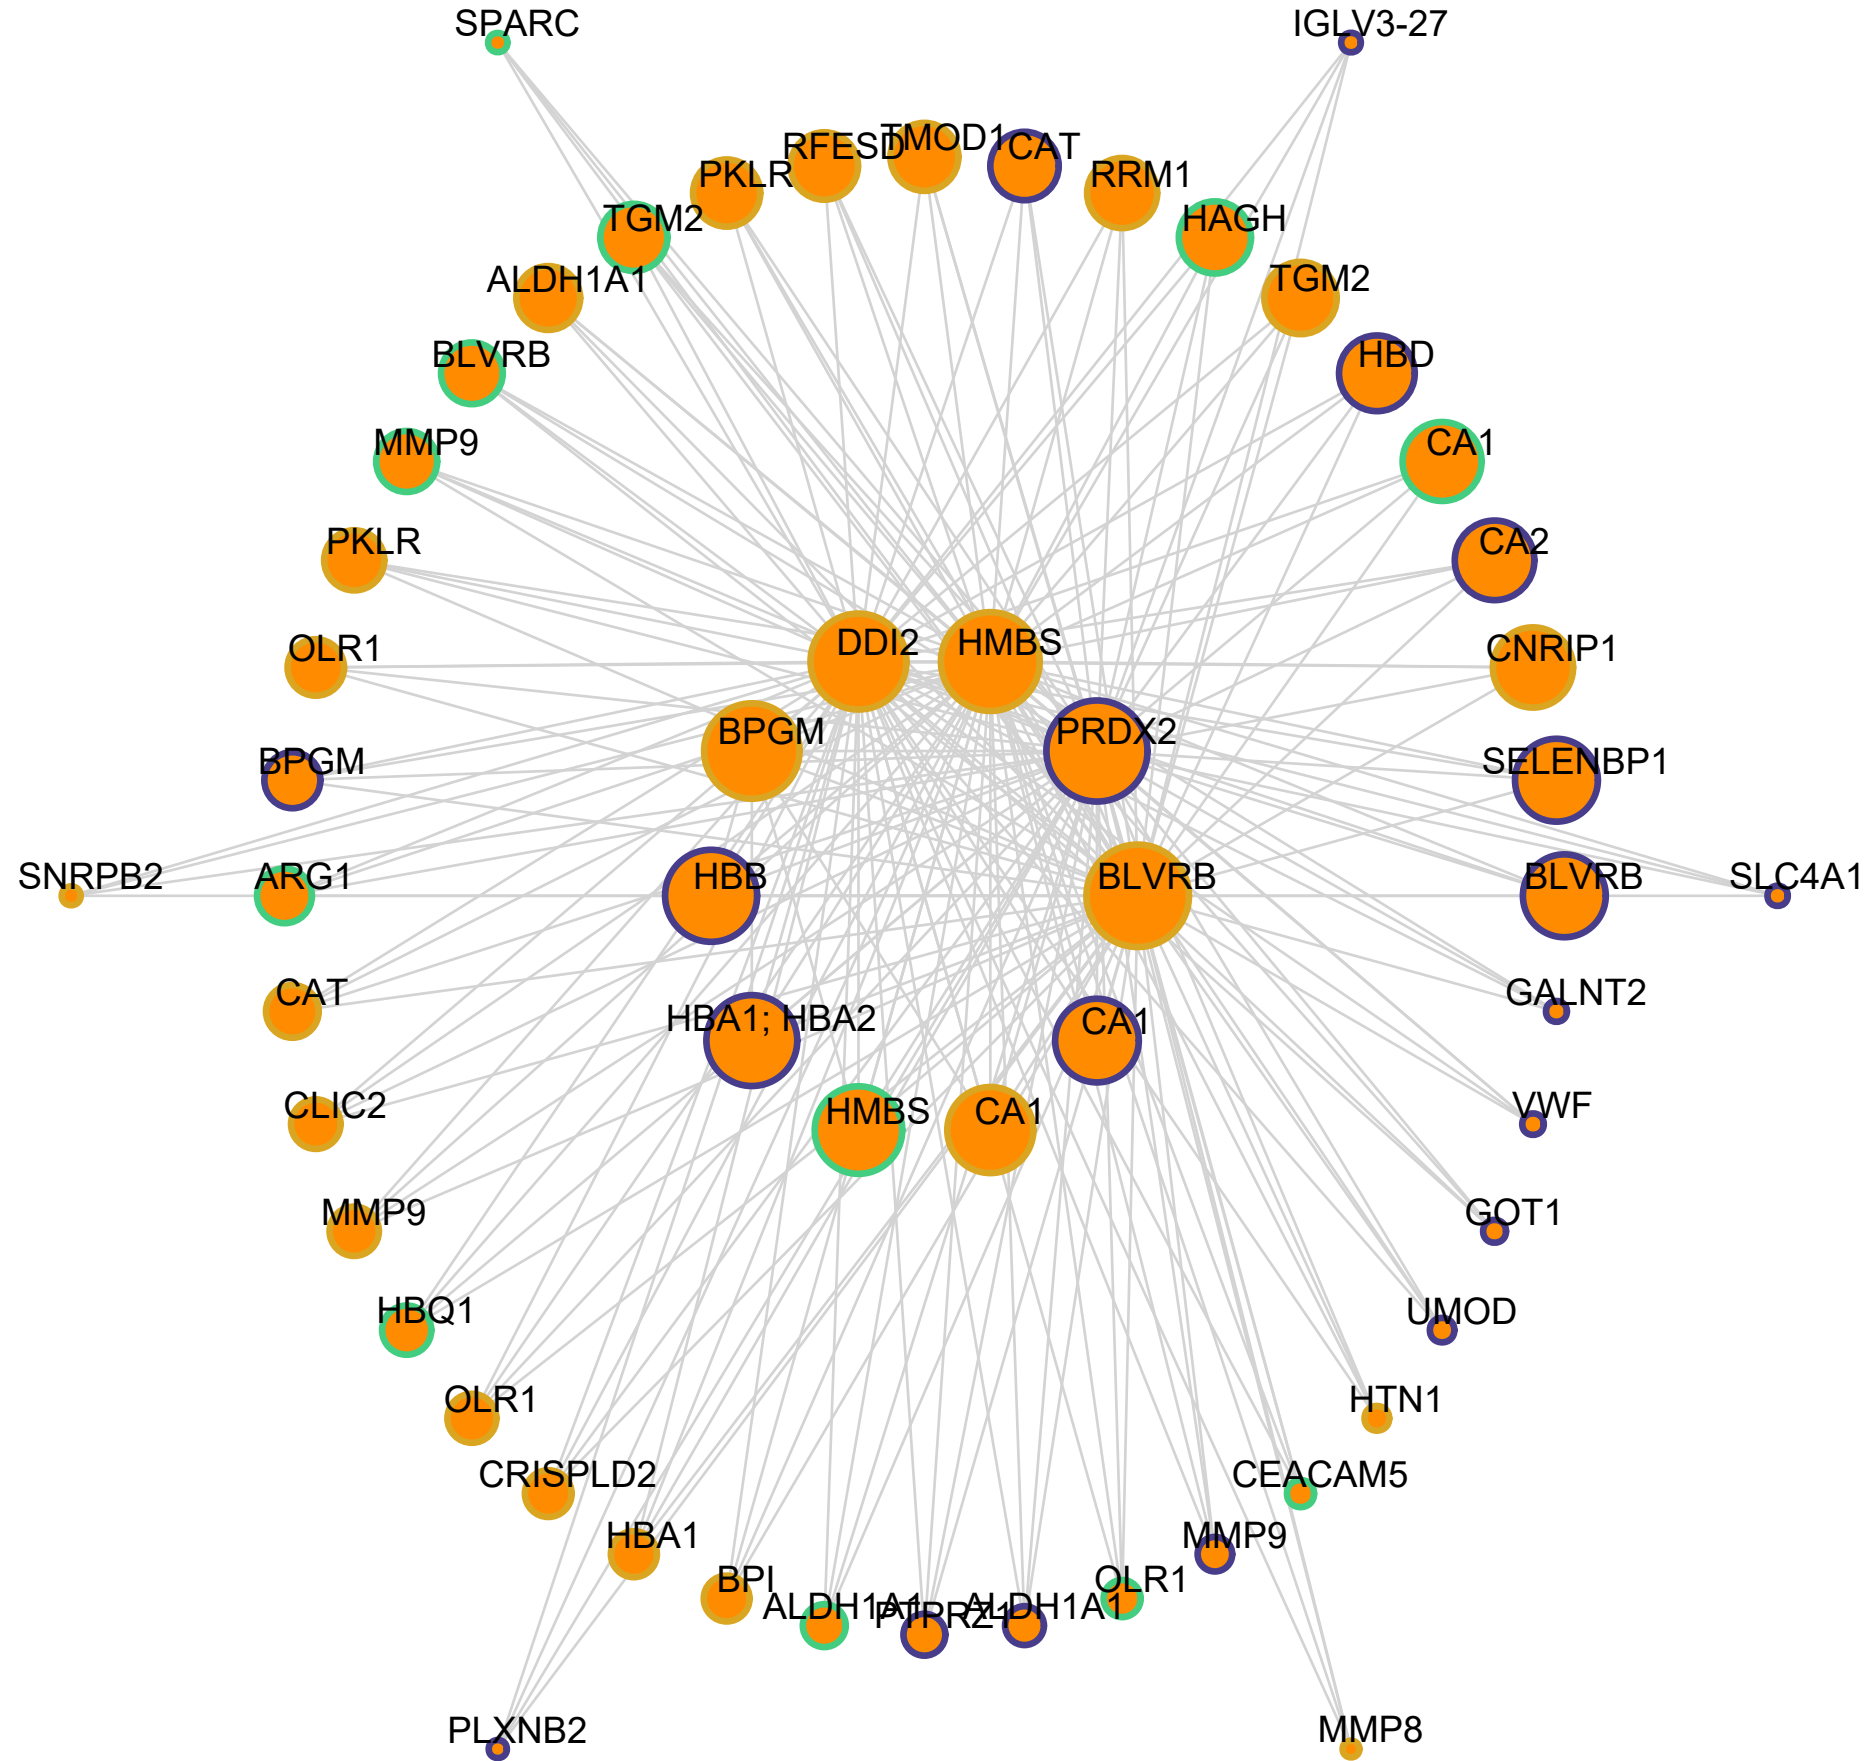

# M4 yellow module: T Cell Regulation

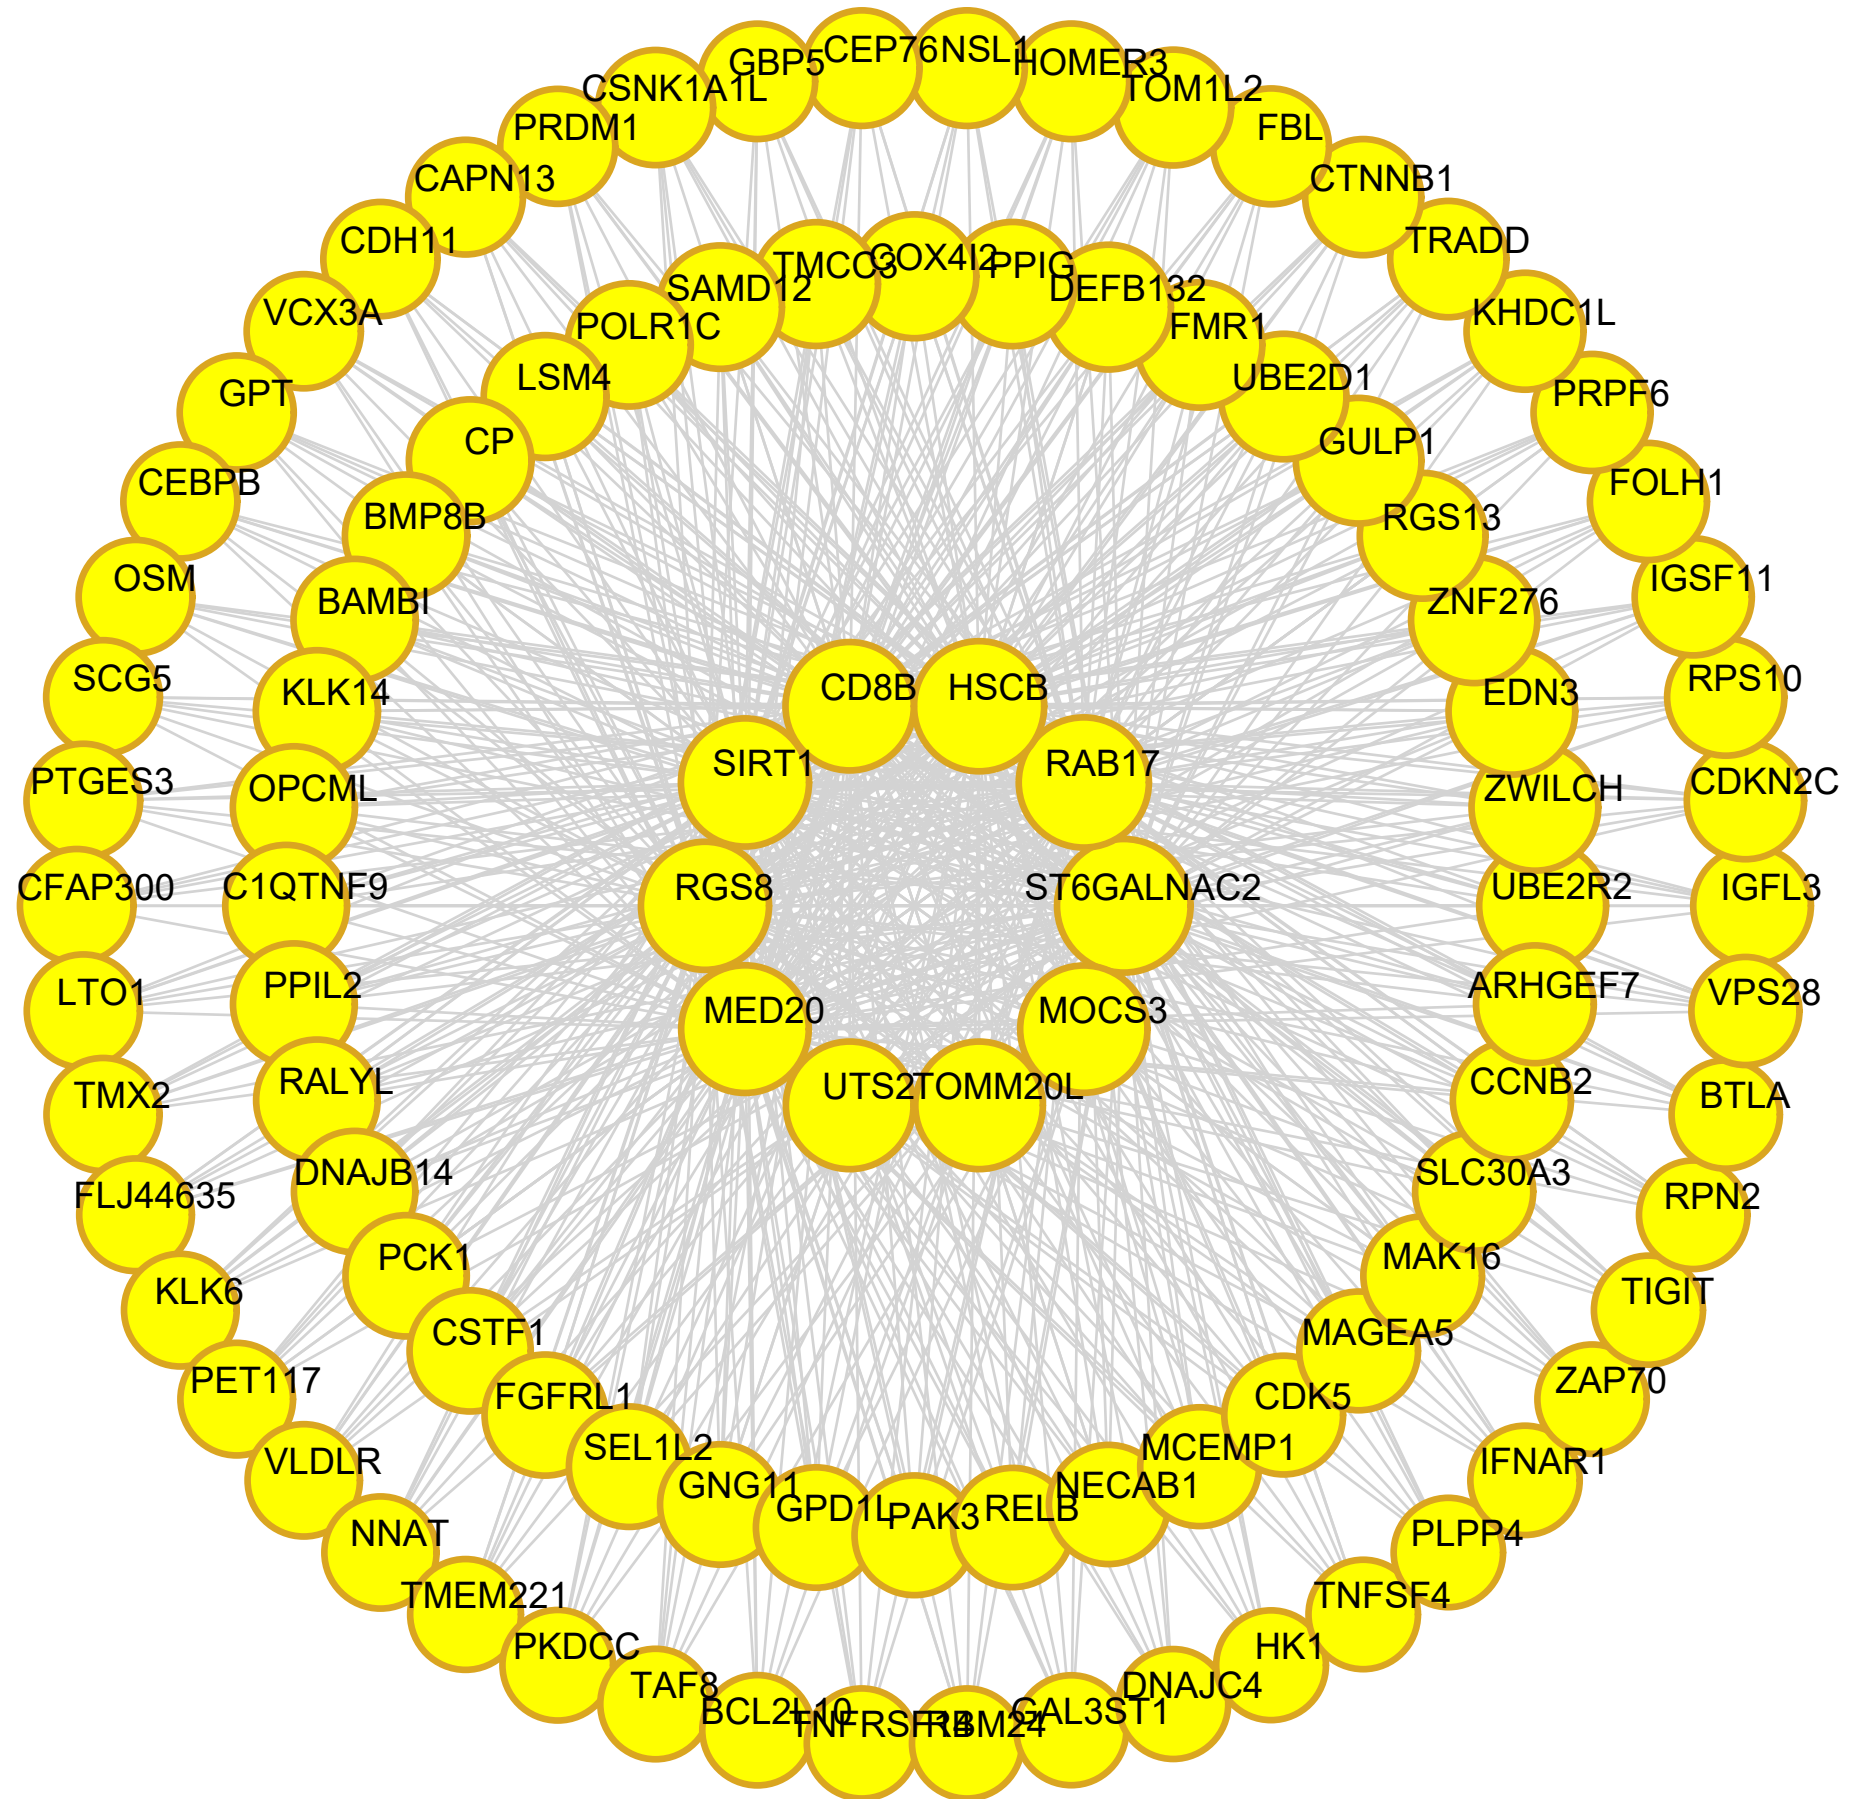









### M31 paleturquoise module: Adhesion/ECM

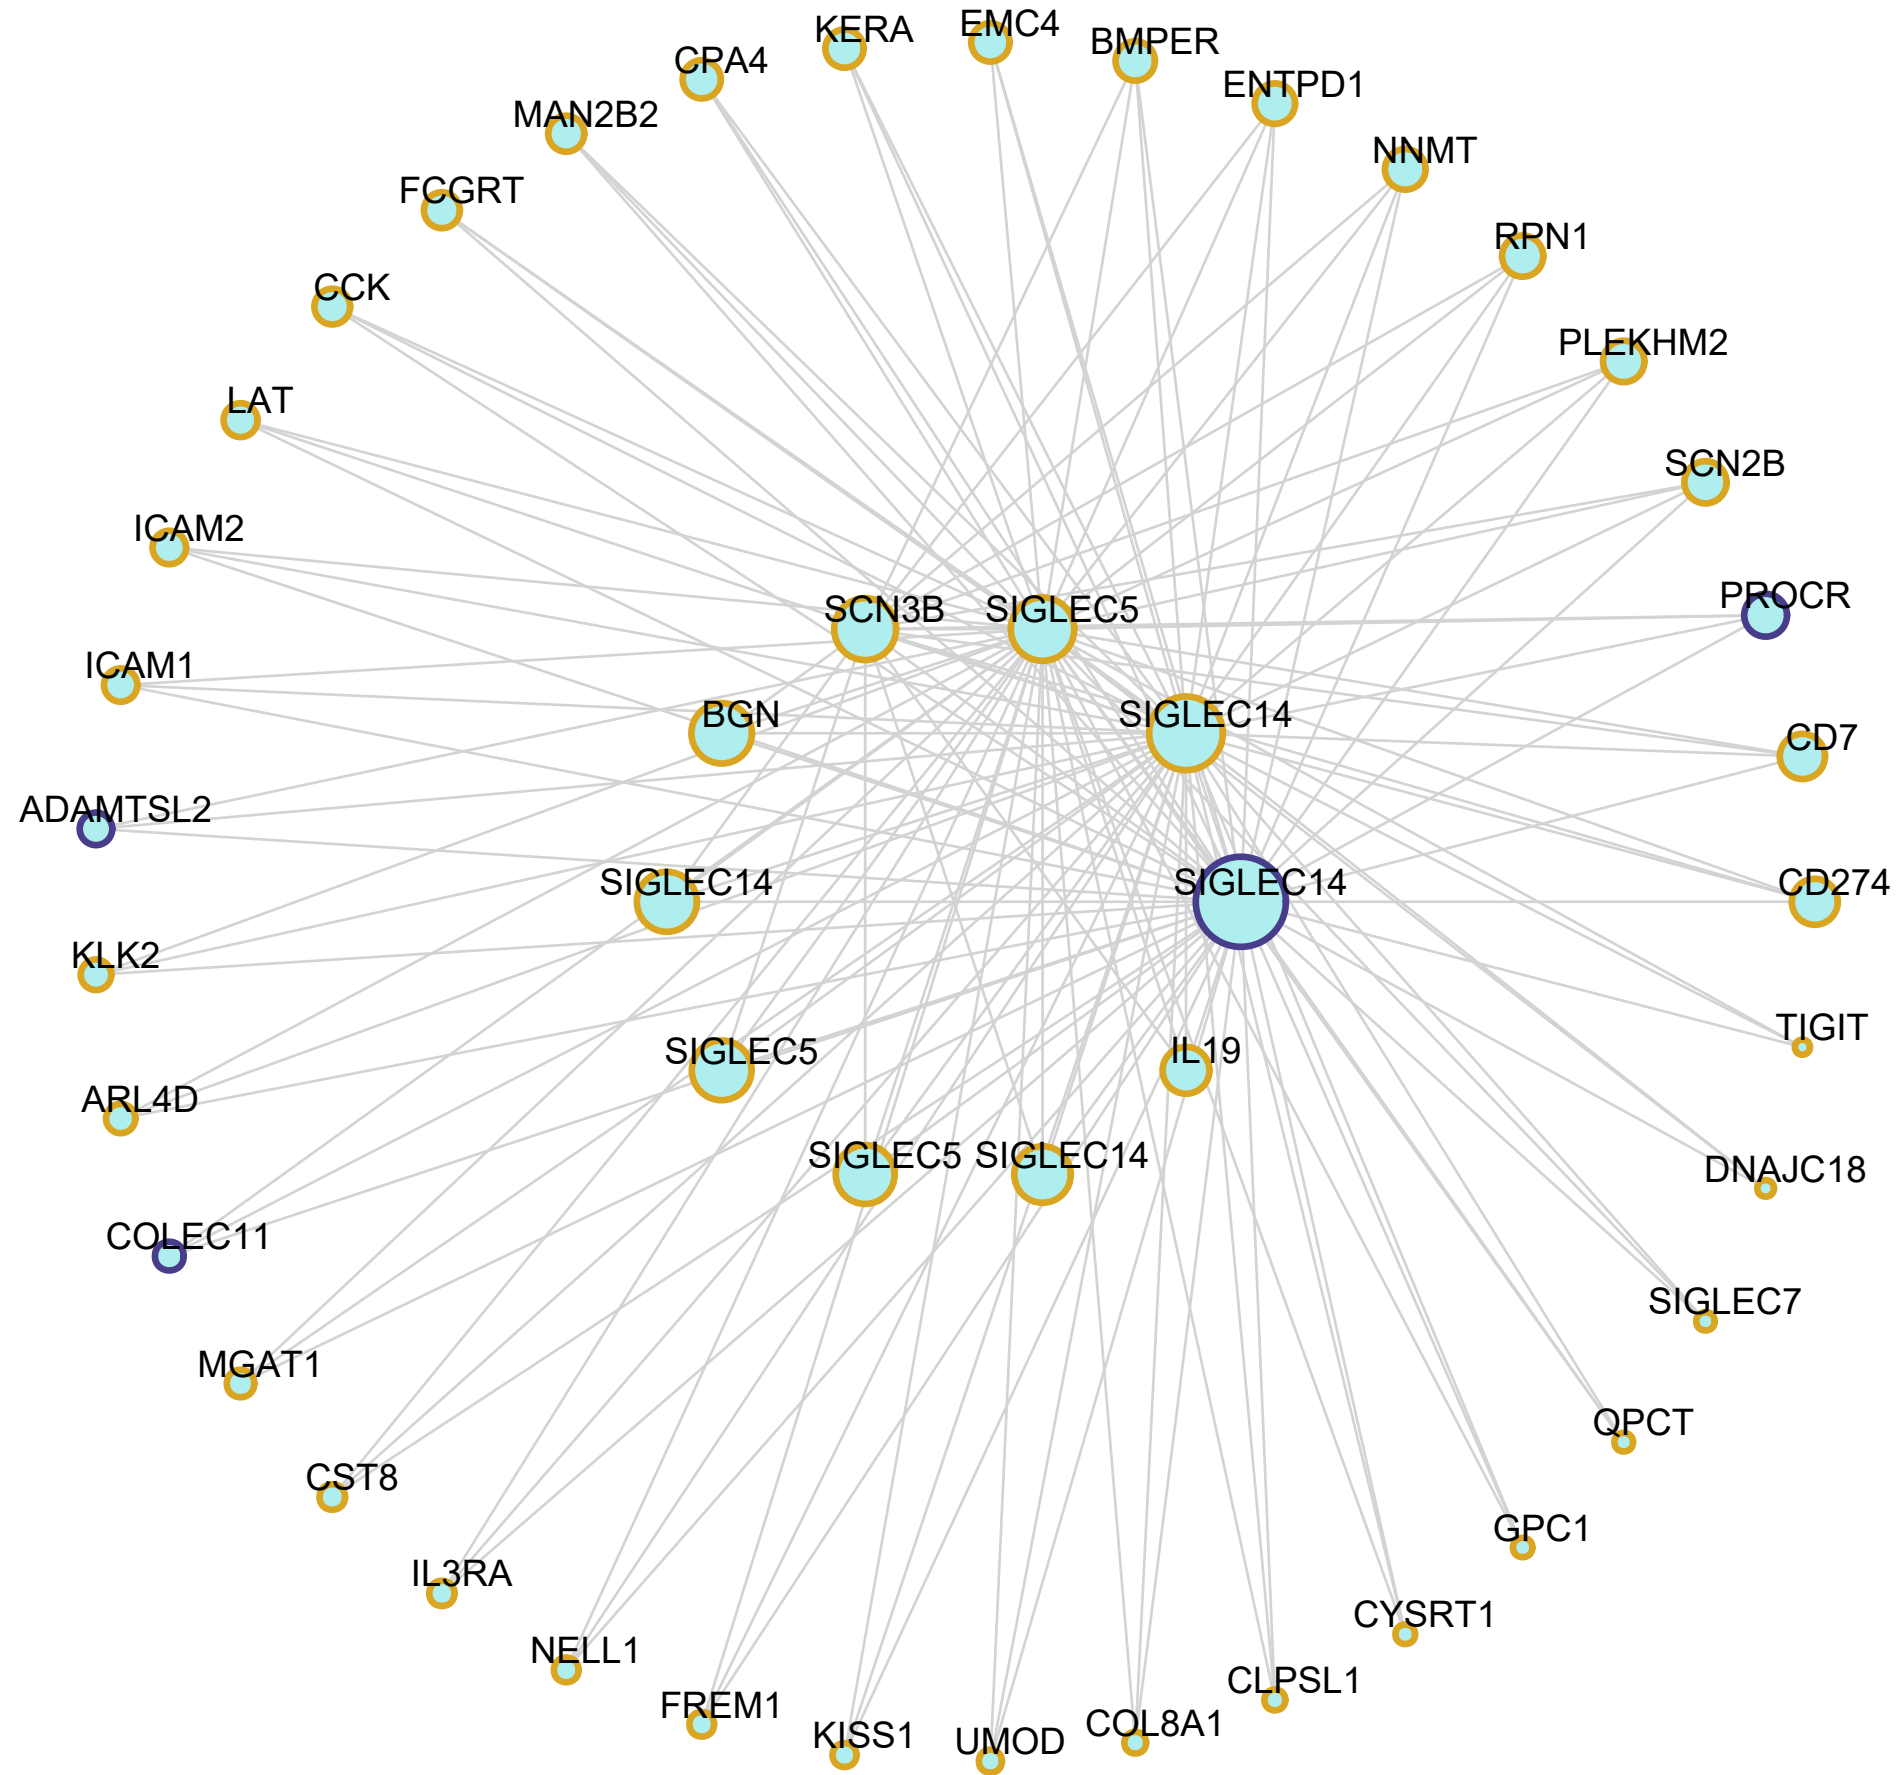

### M14 cyan module: Innate Immune Response

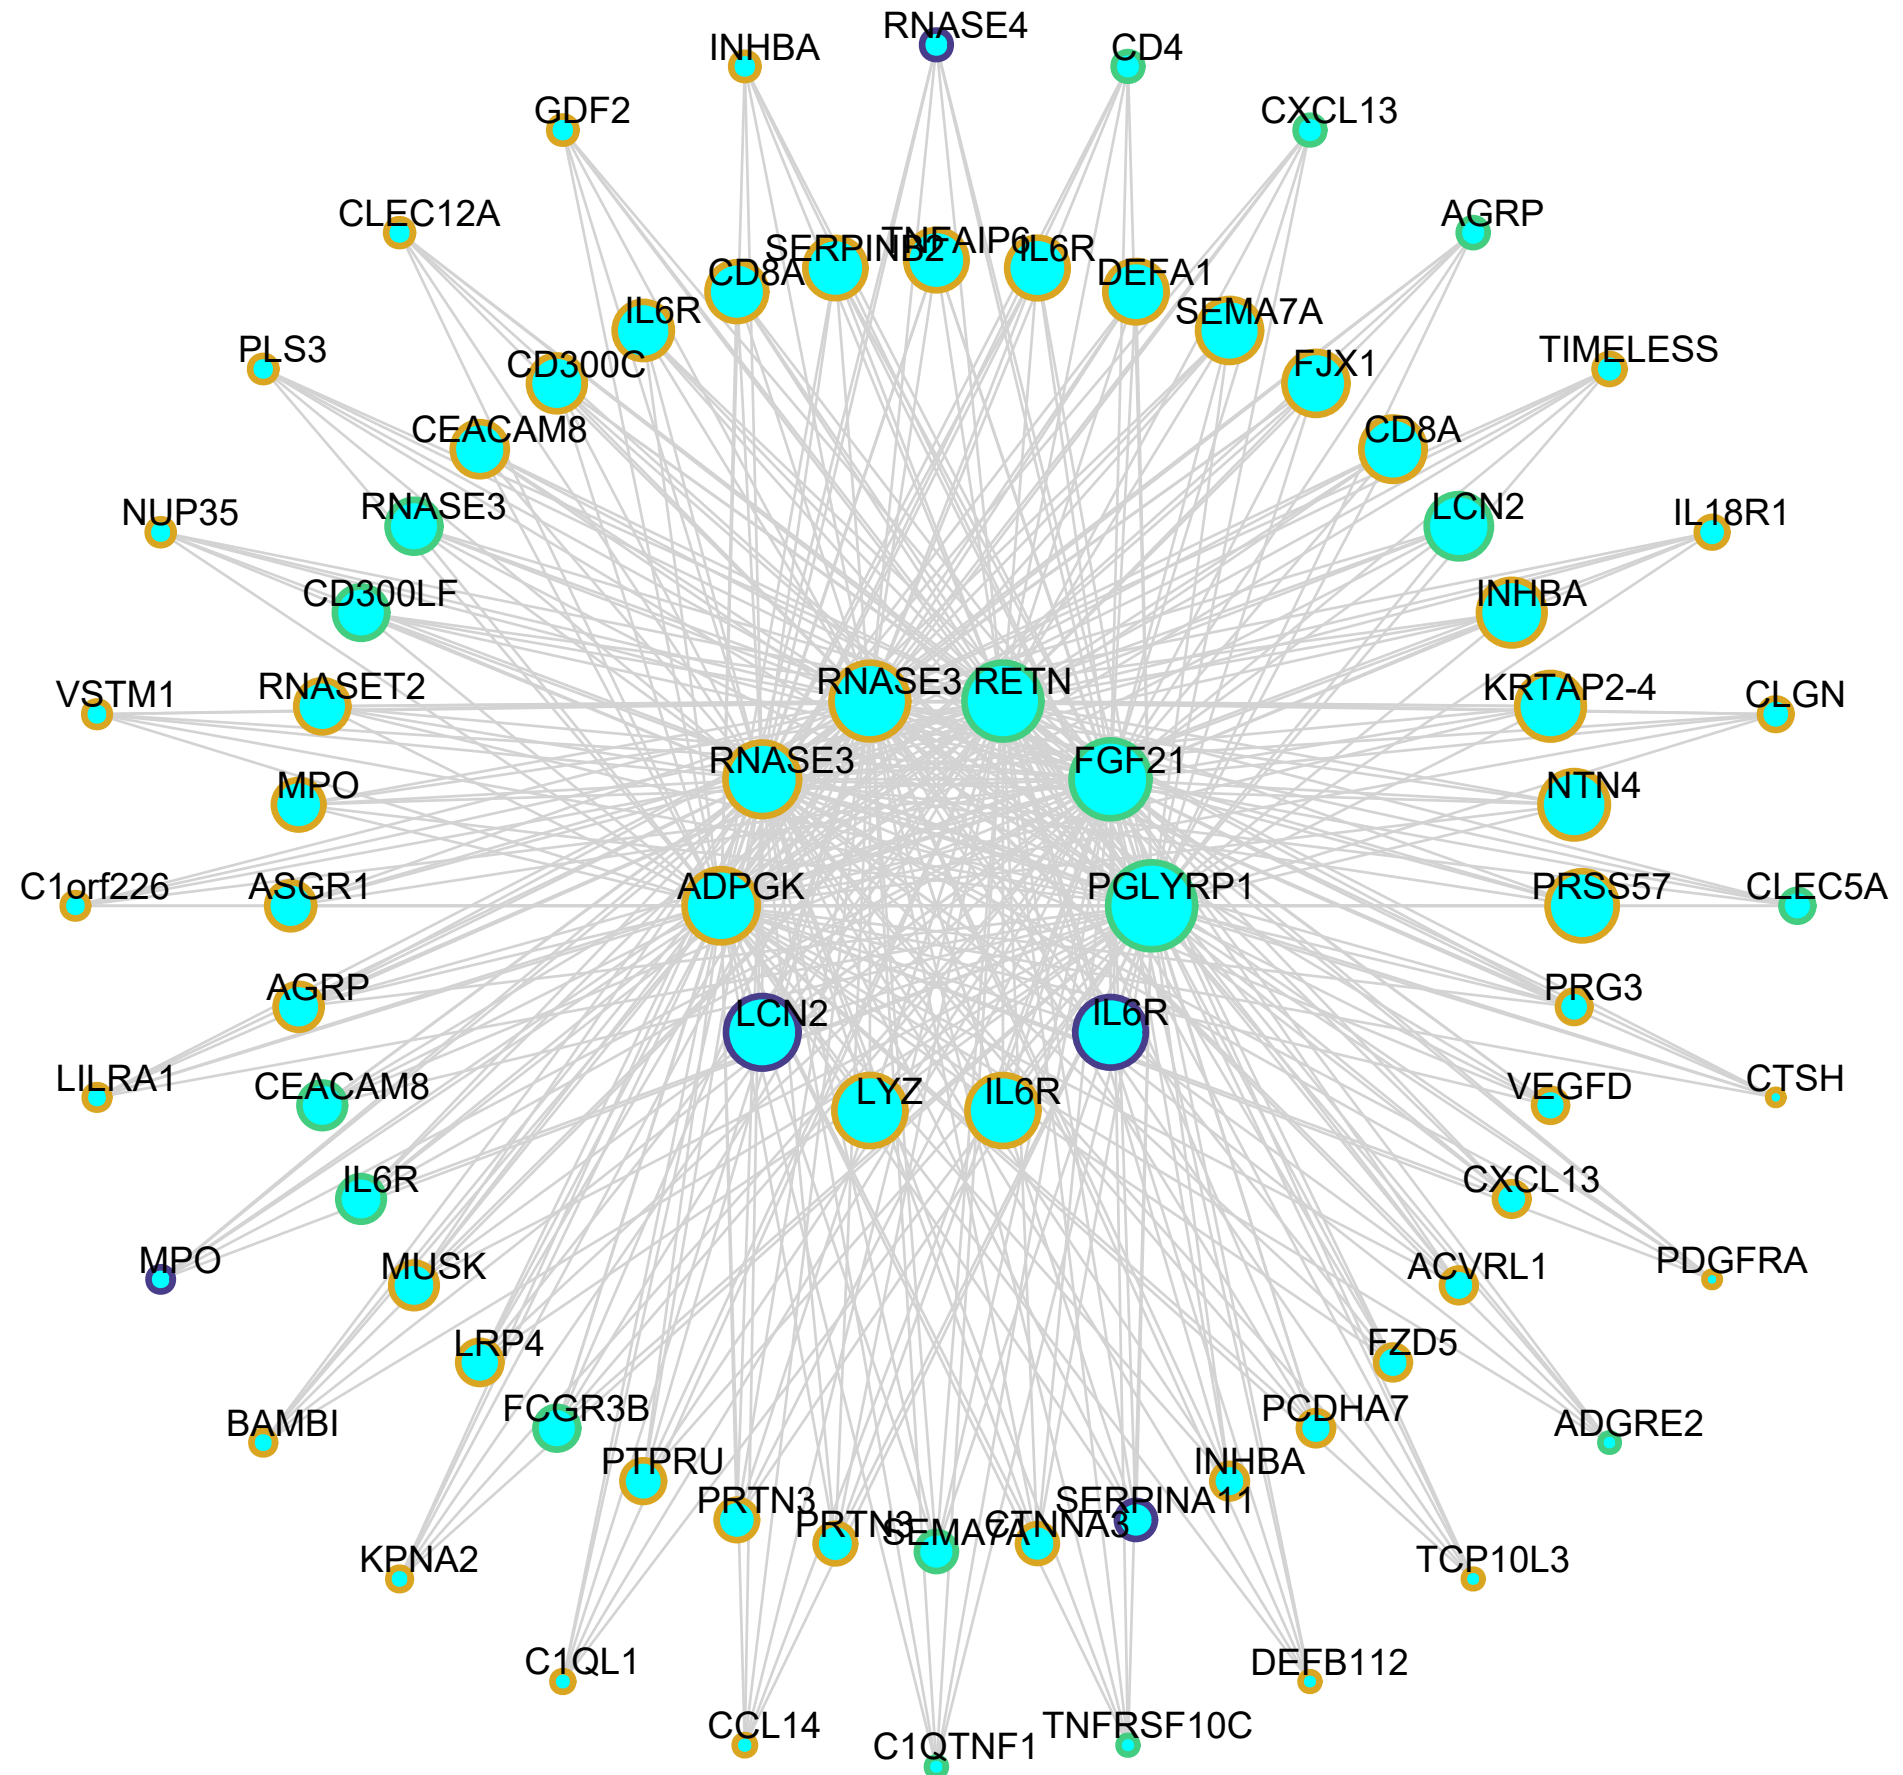



# M19 lightyellow module: Leukocyte Activation

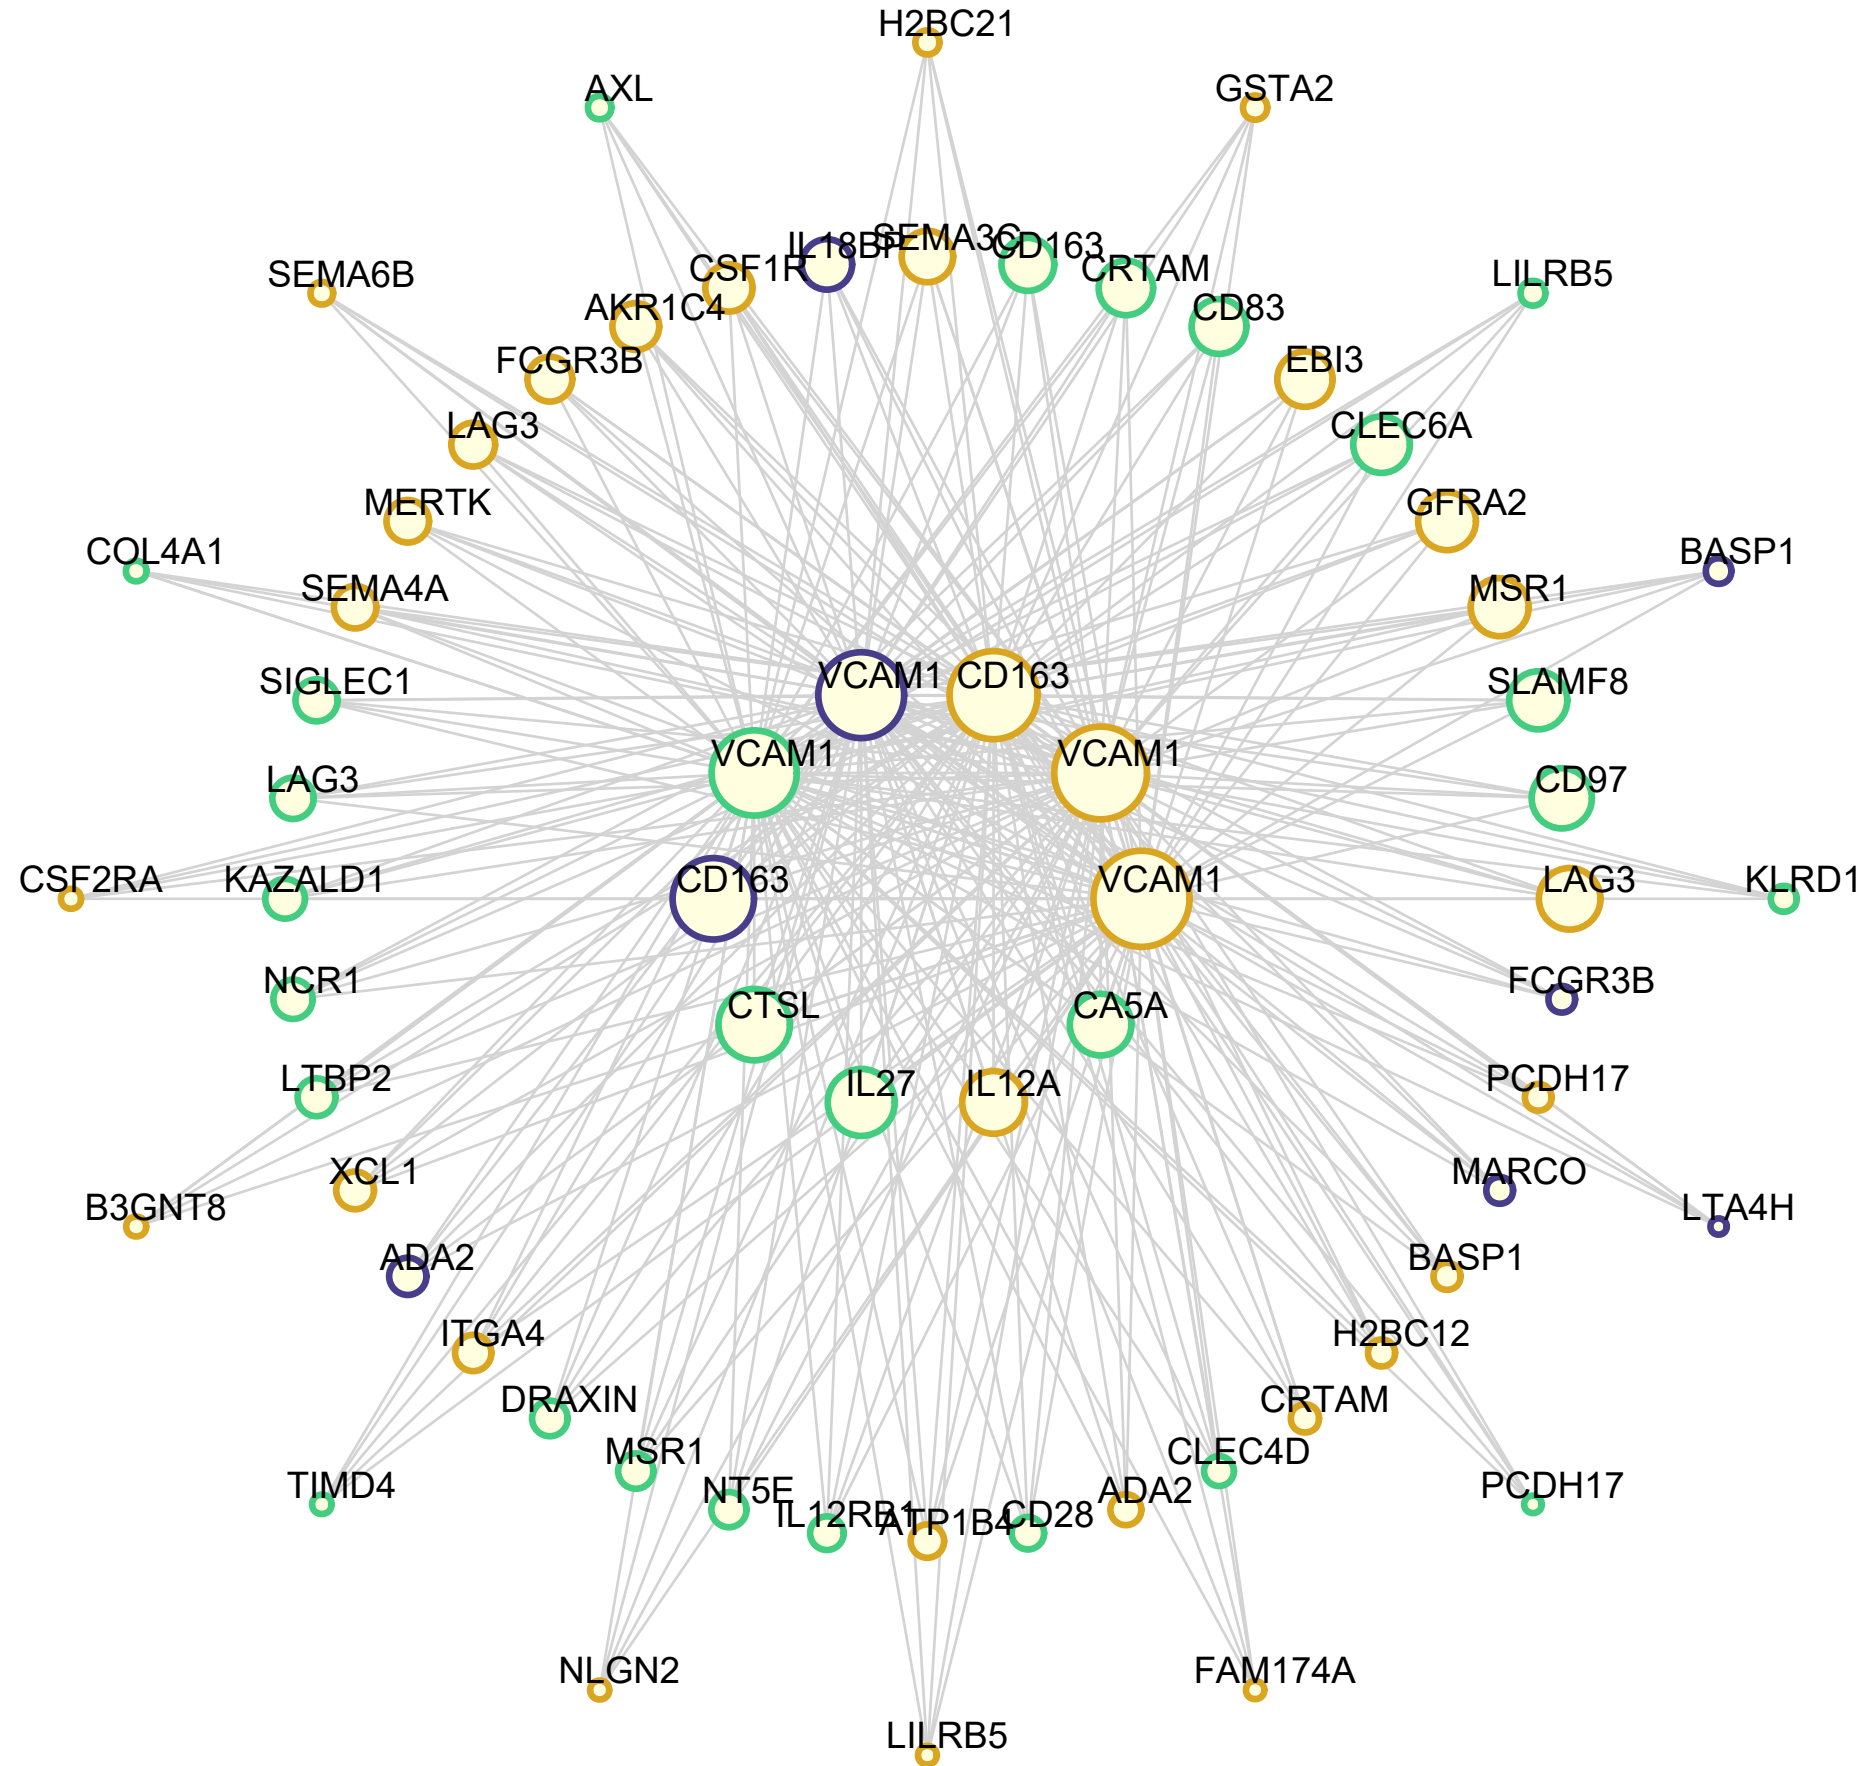

# M15 midnightblue module: Lipid Biosynthesis/Immune Response

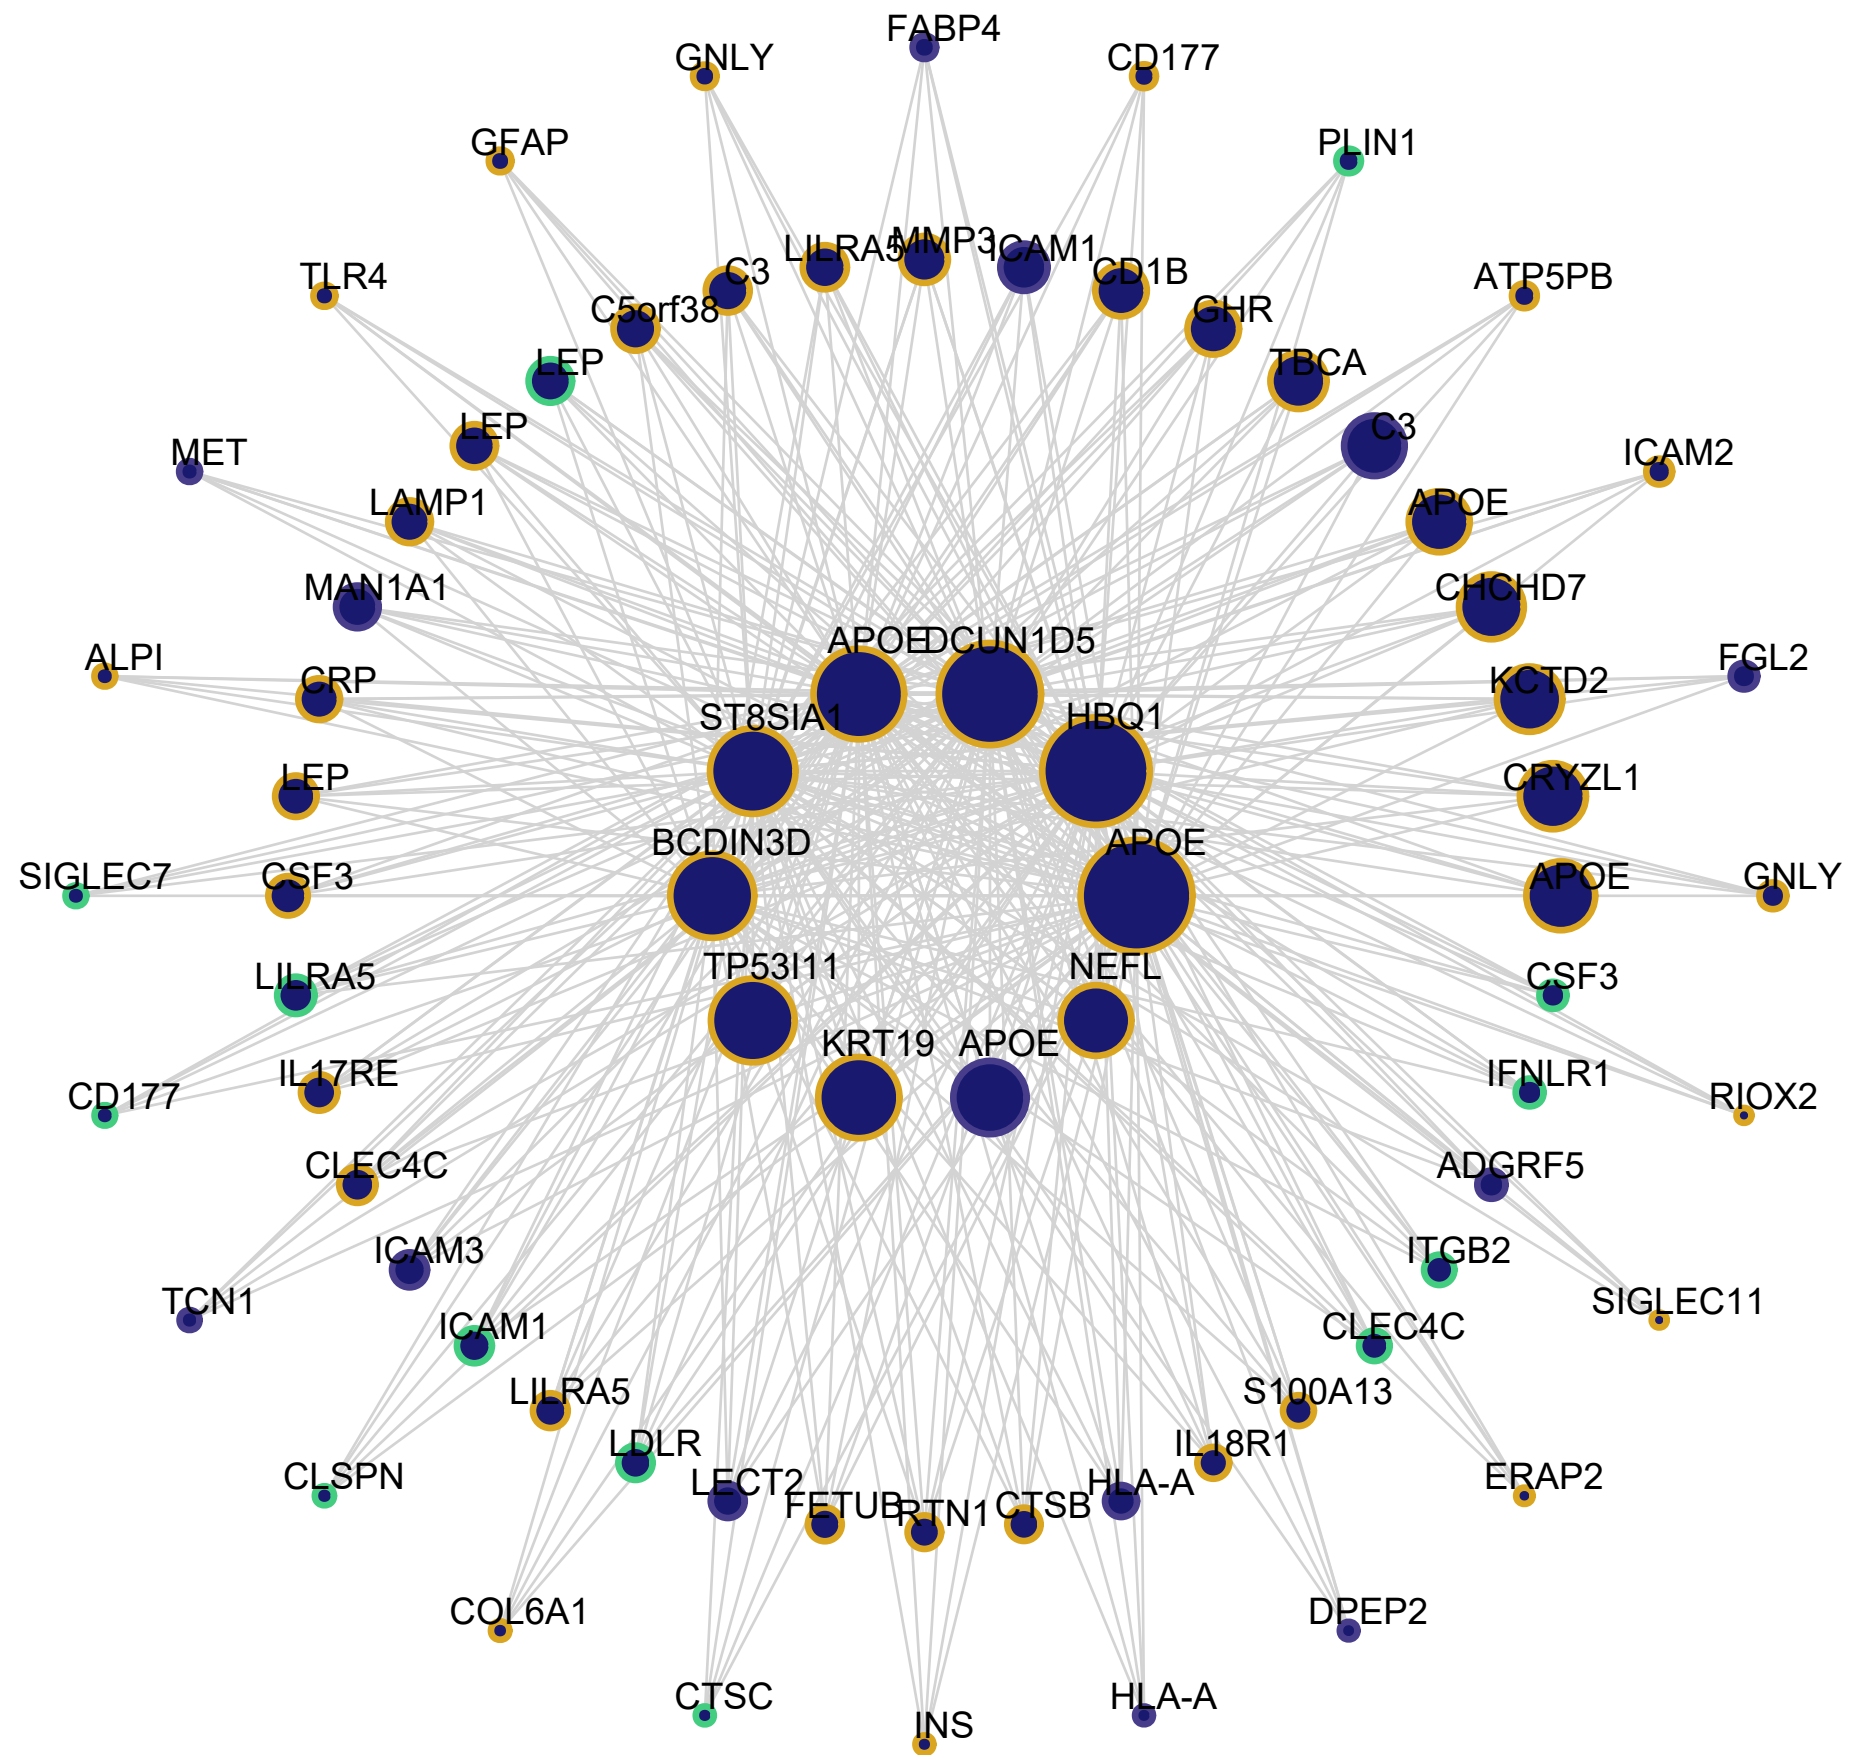

# M29 saddlebrown module: IGF-Growth/GAG Binding

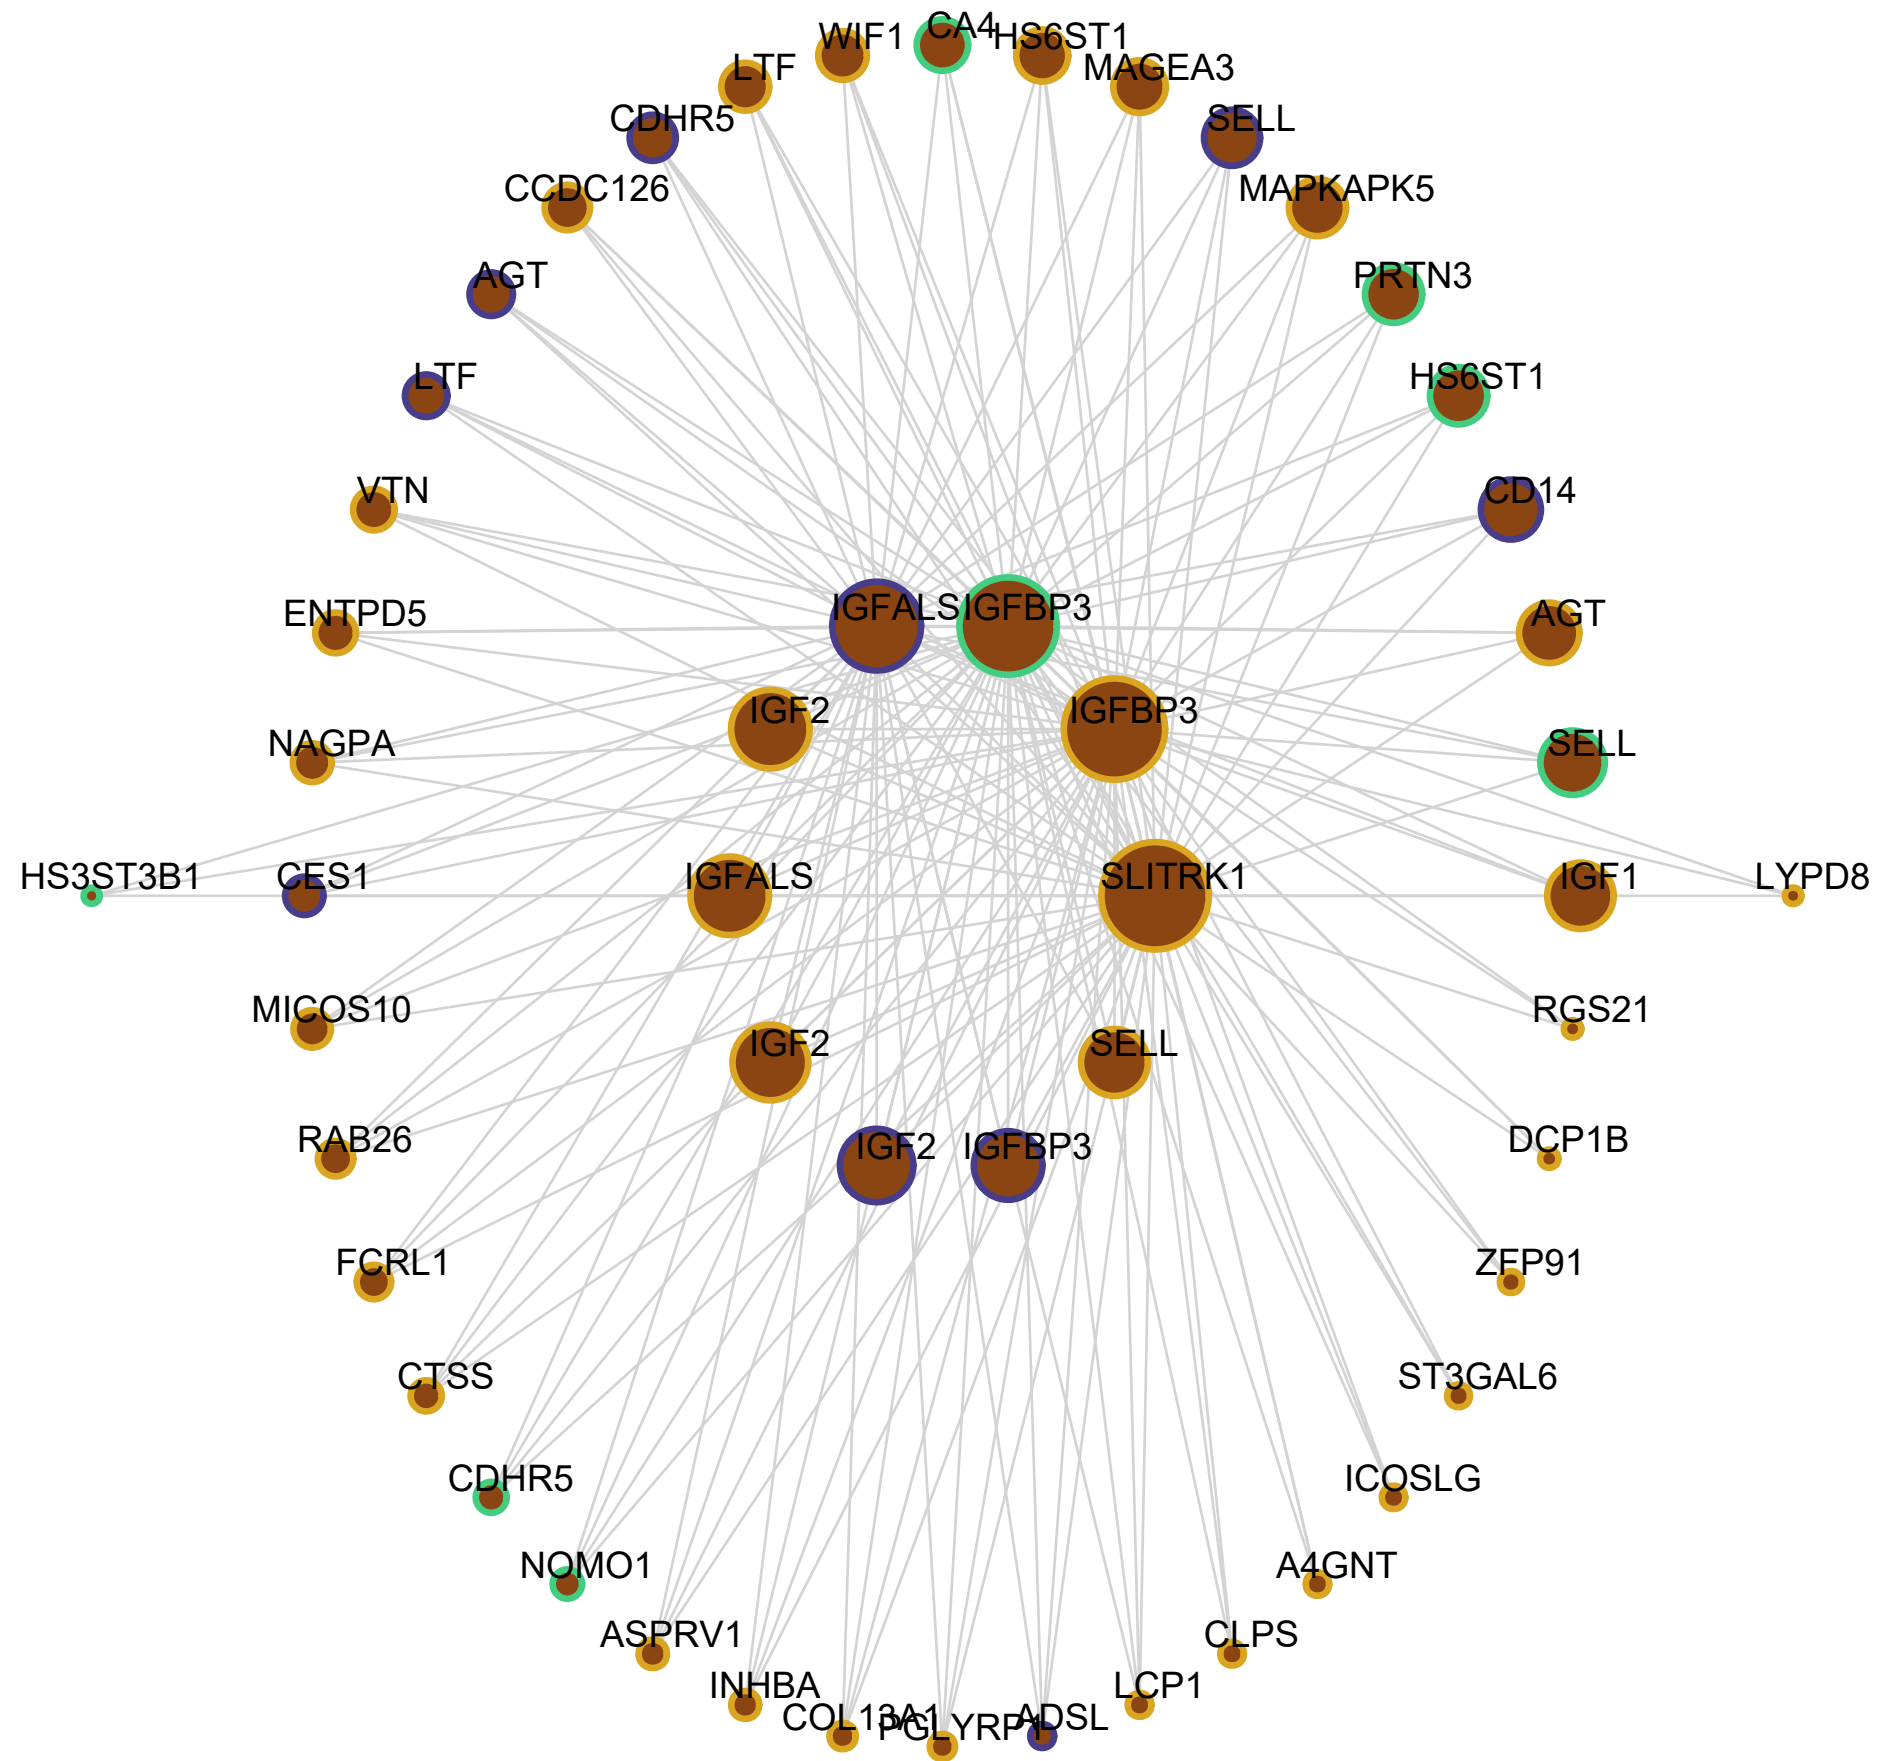



# M21 darkred module: Metal Ion Homeostasis

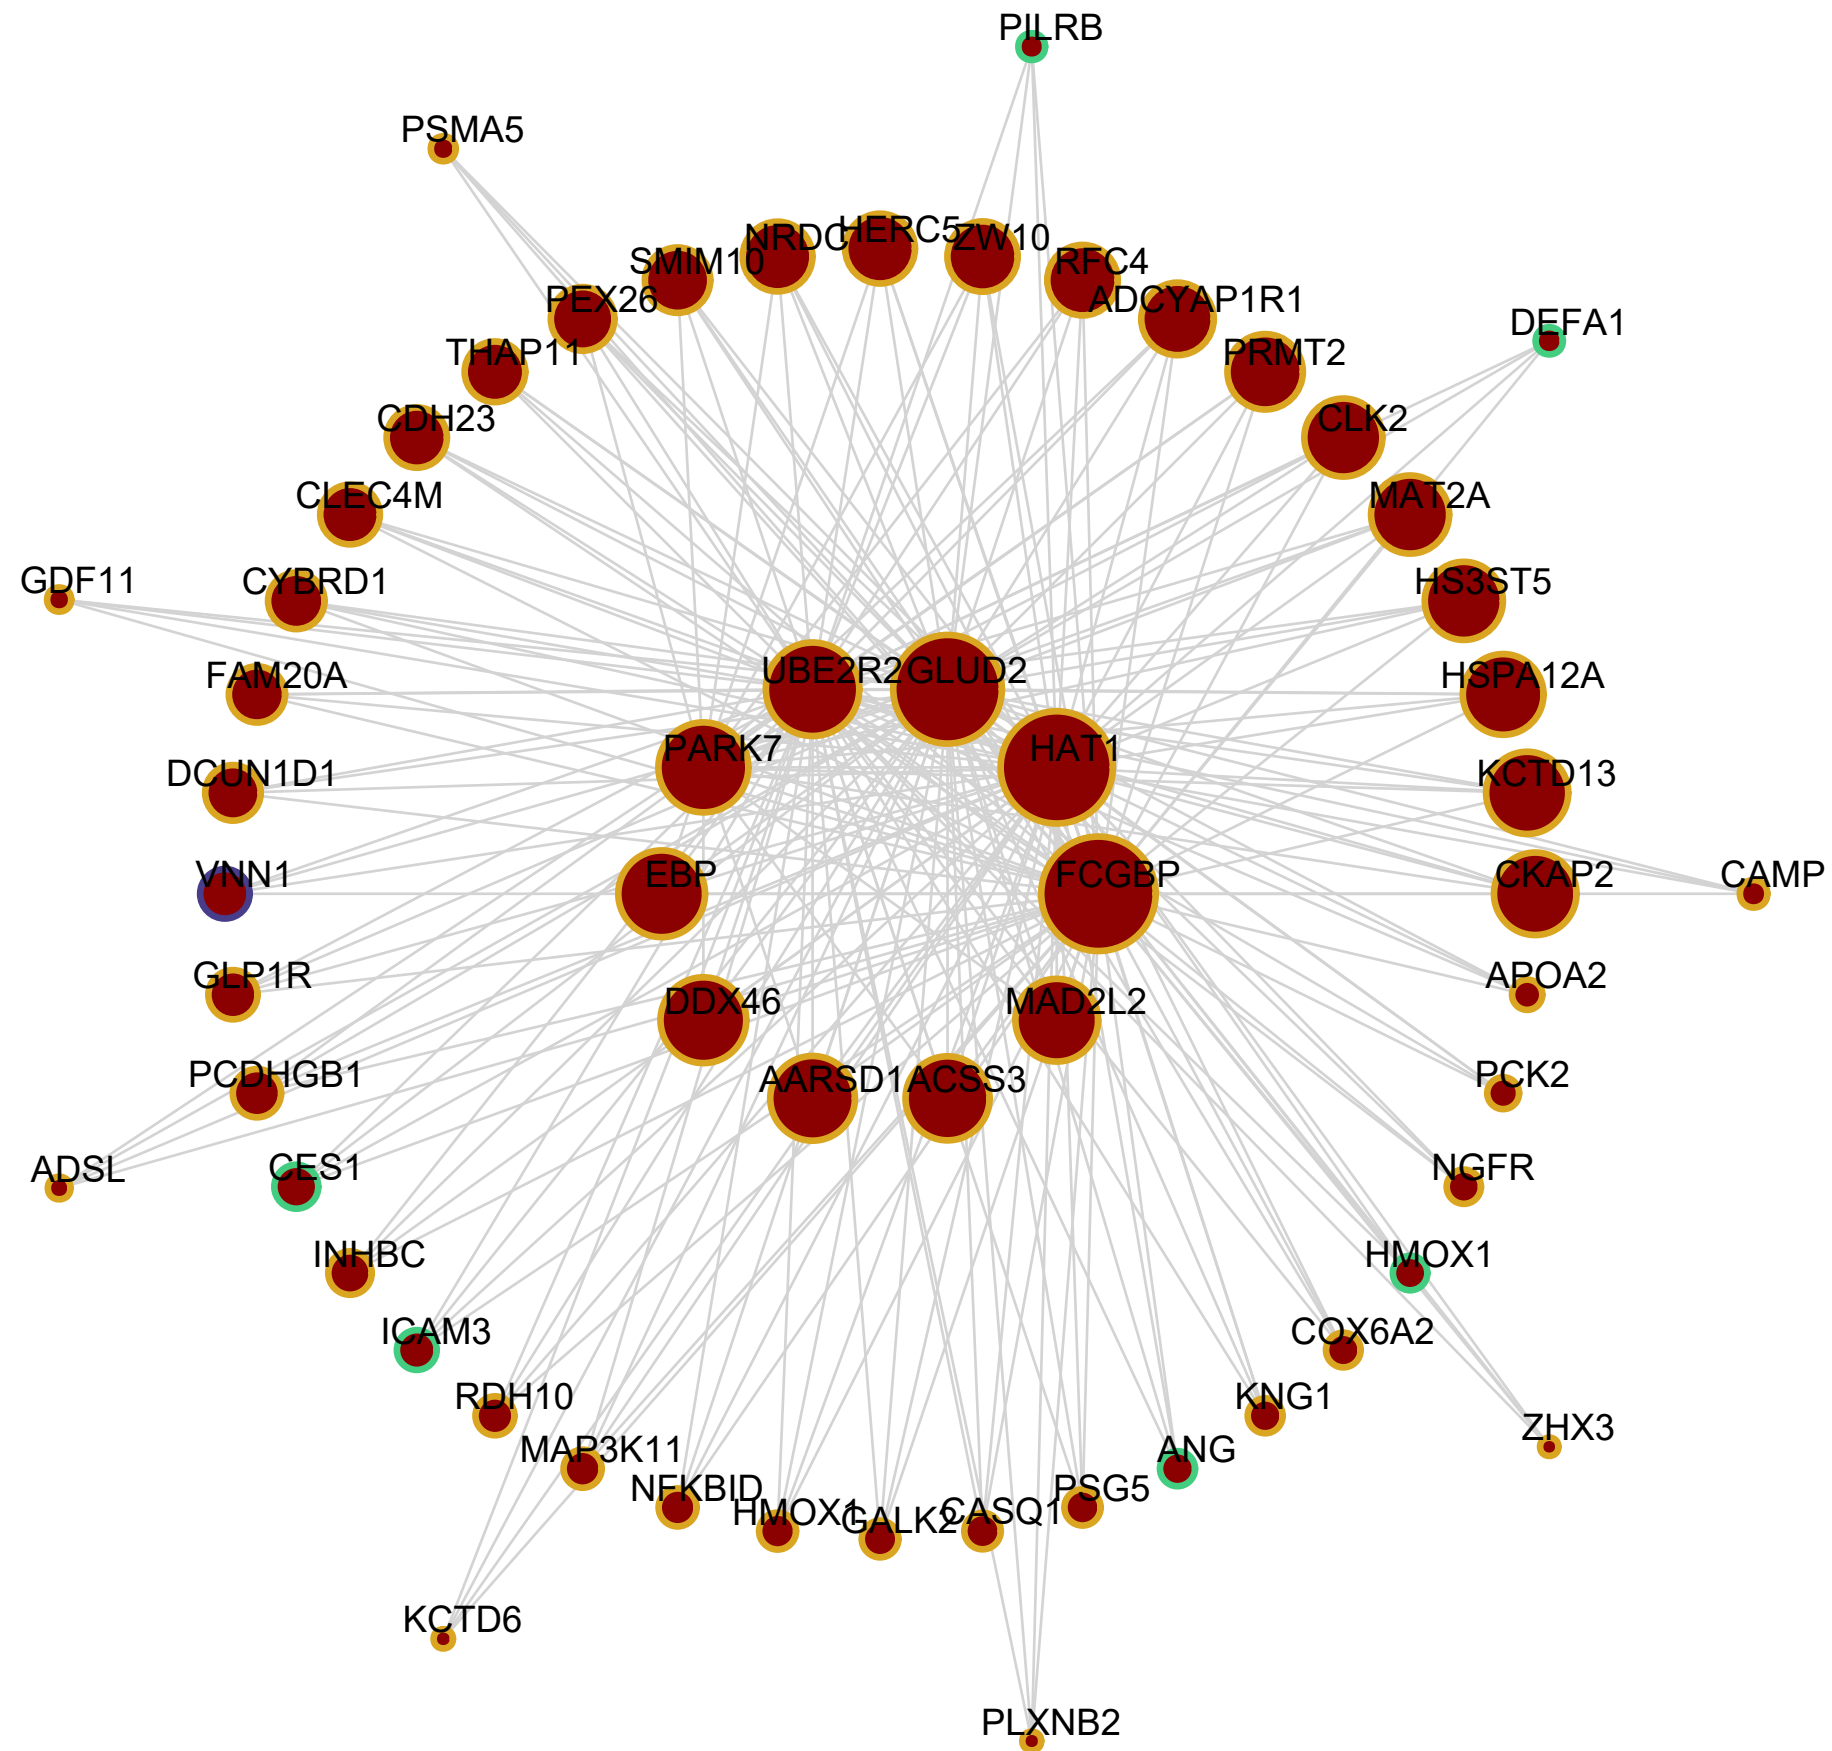









# M25 orange module: Lysosome

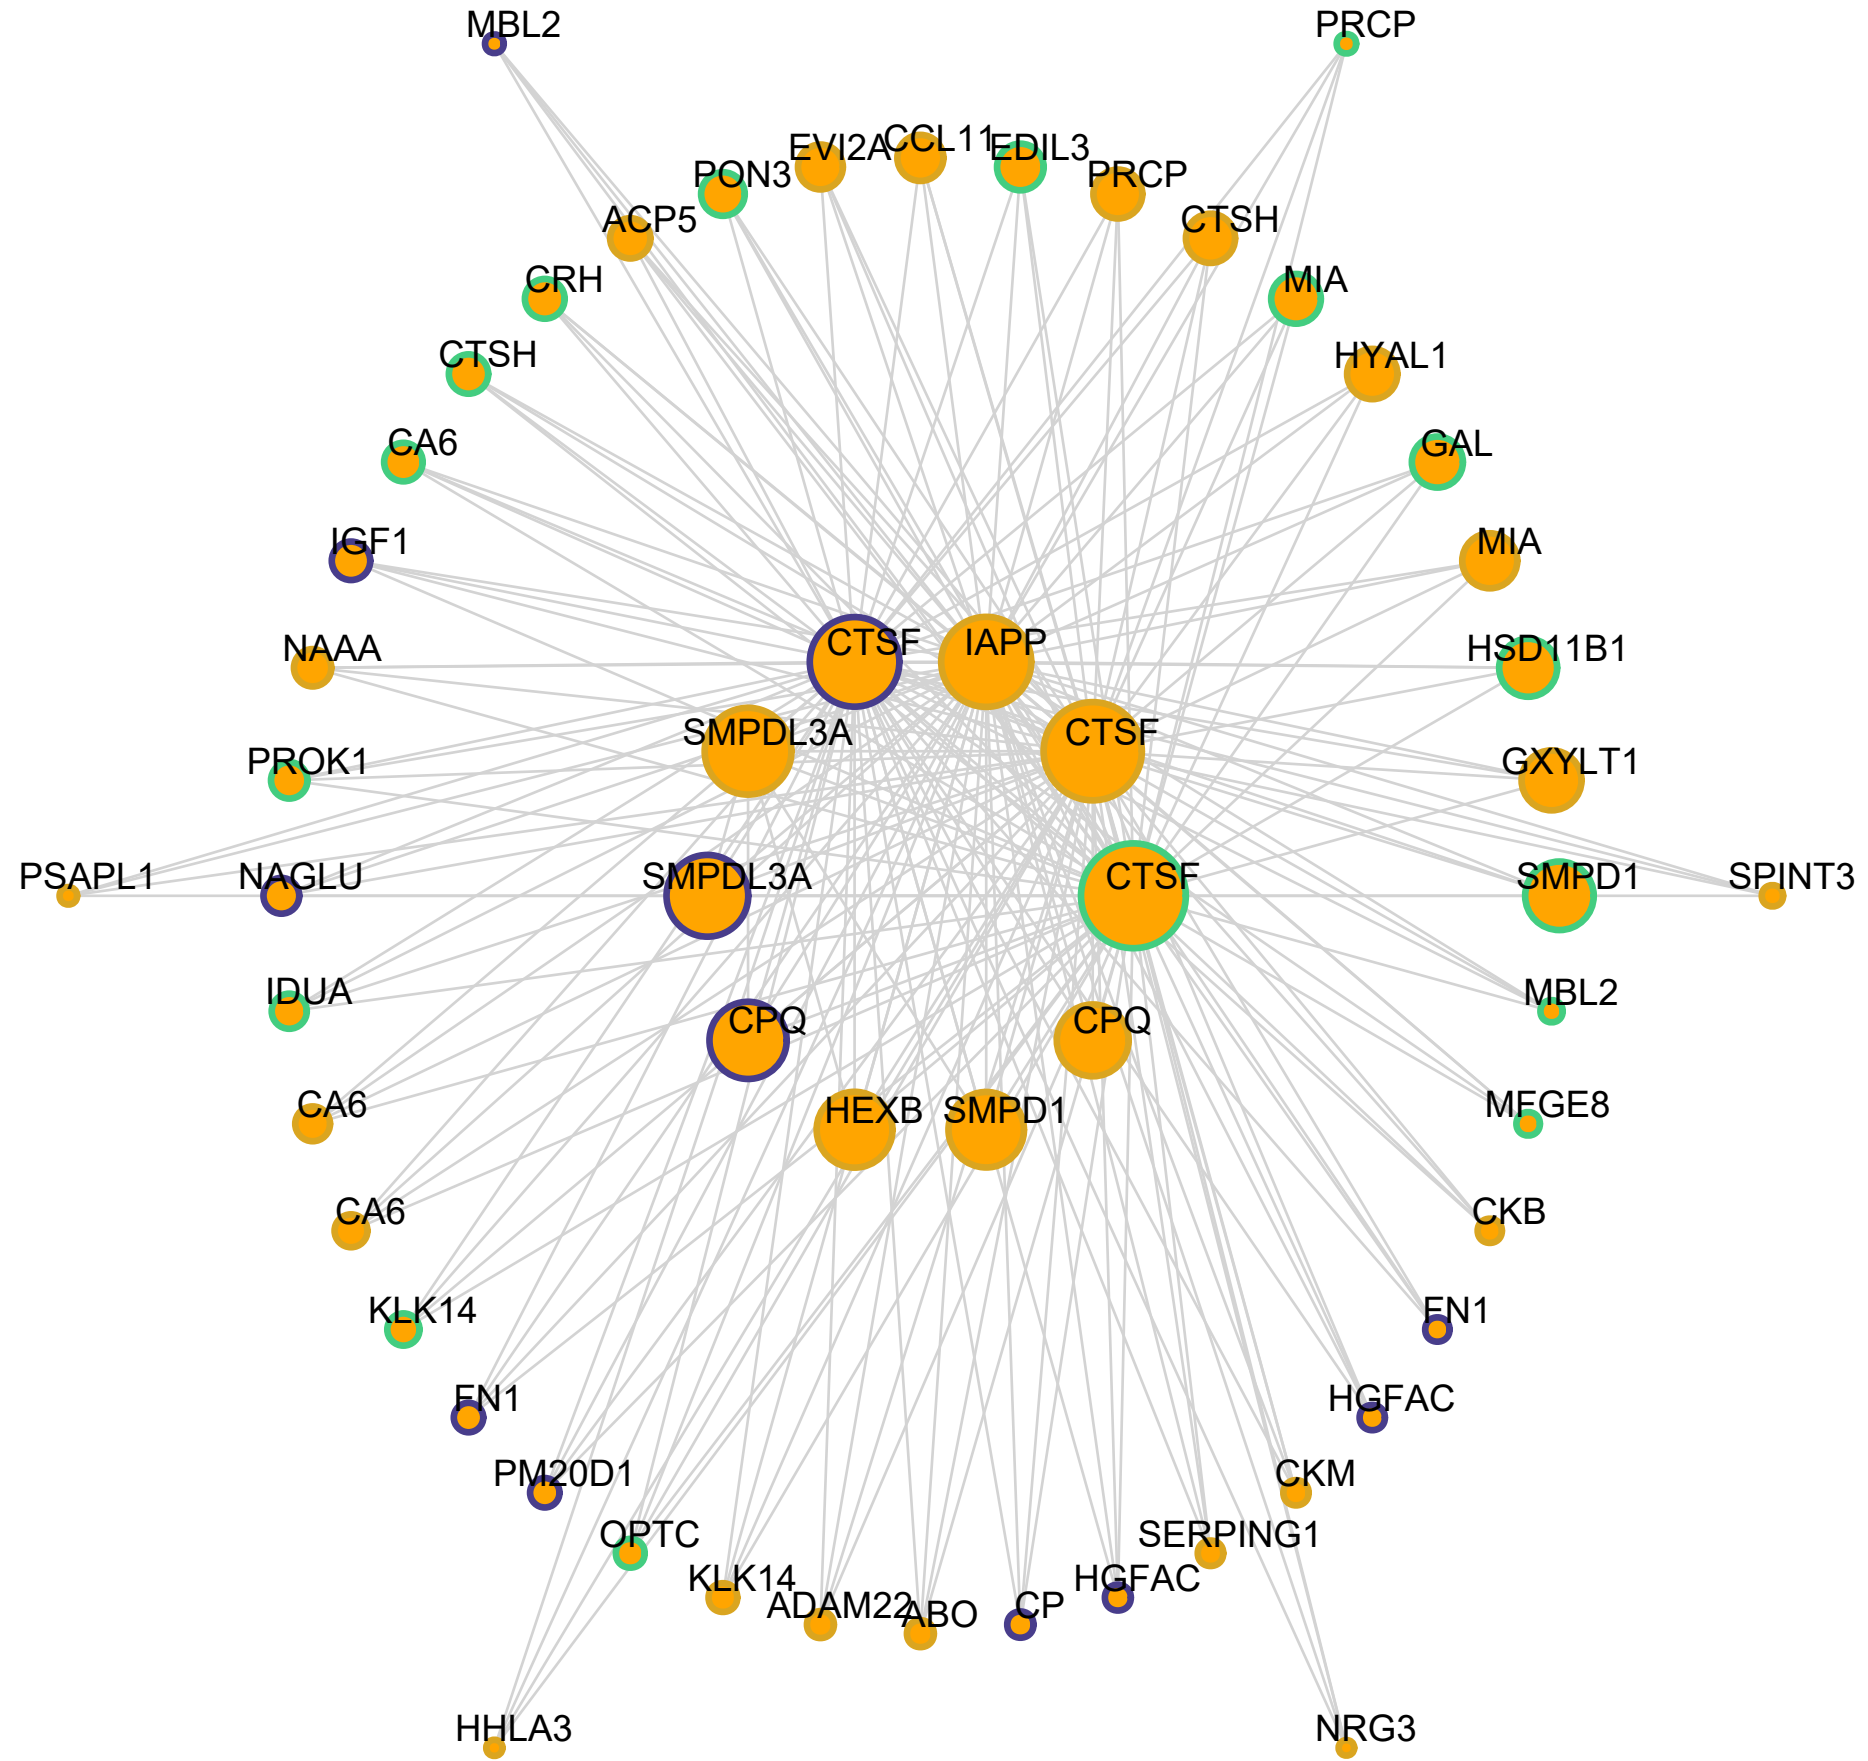

# M13 salmon module: Ambiguous

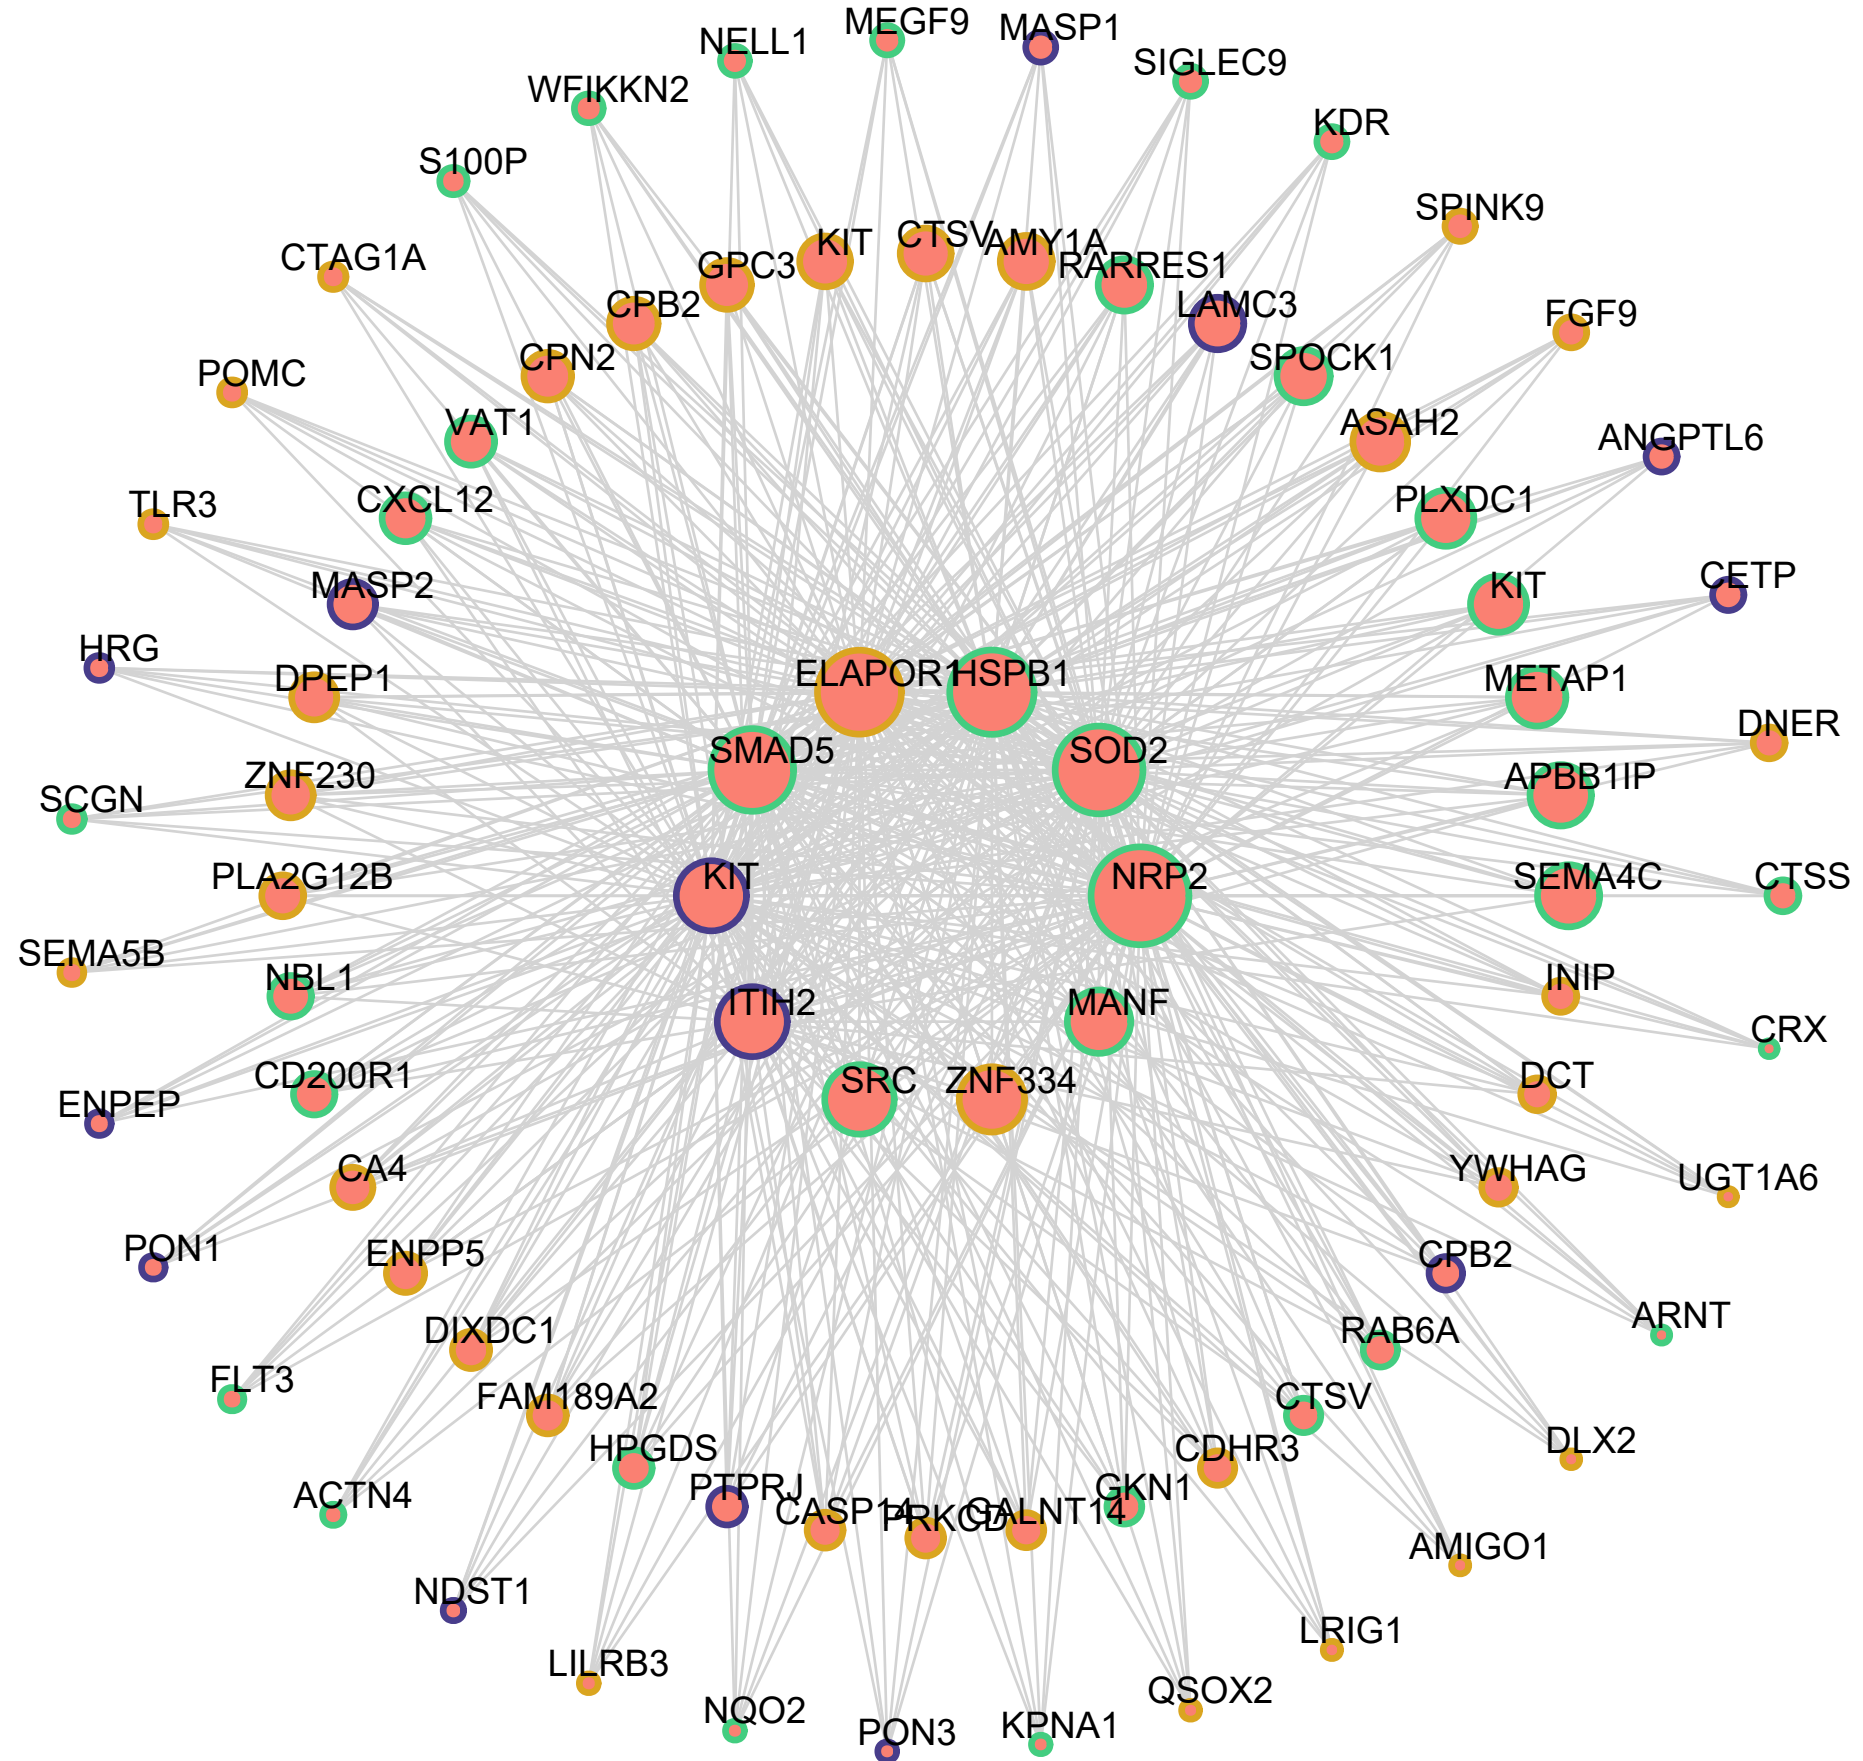

# M22 darkgreen module: Protein Activation Cascade/Proteolysis

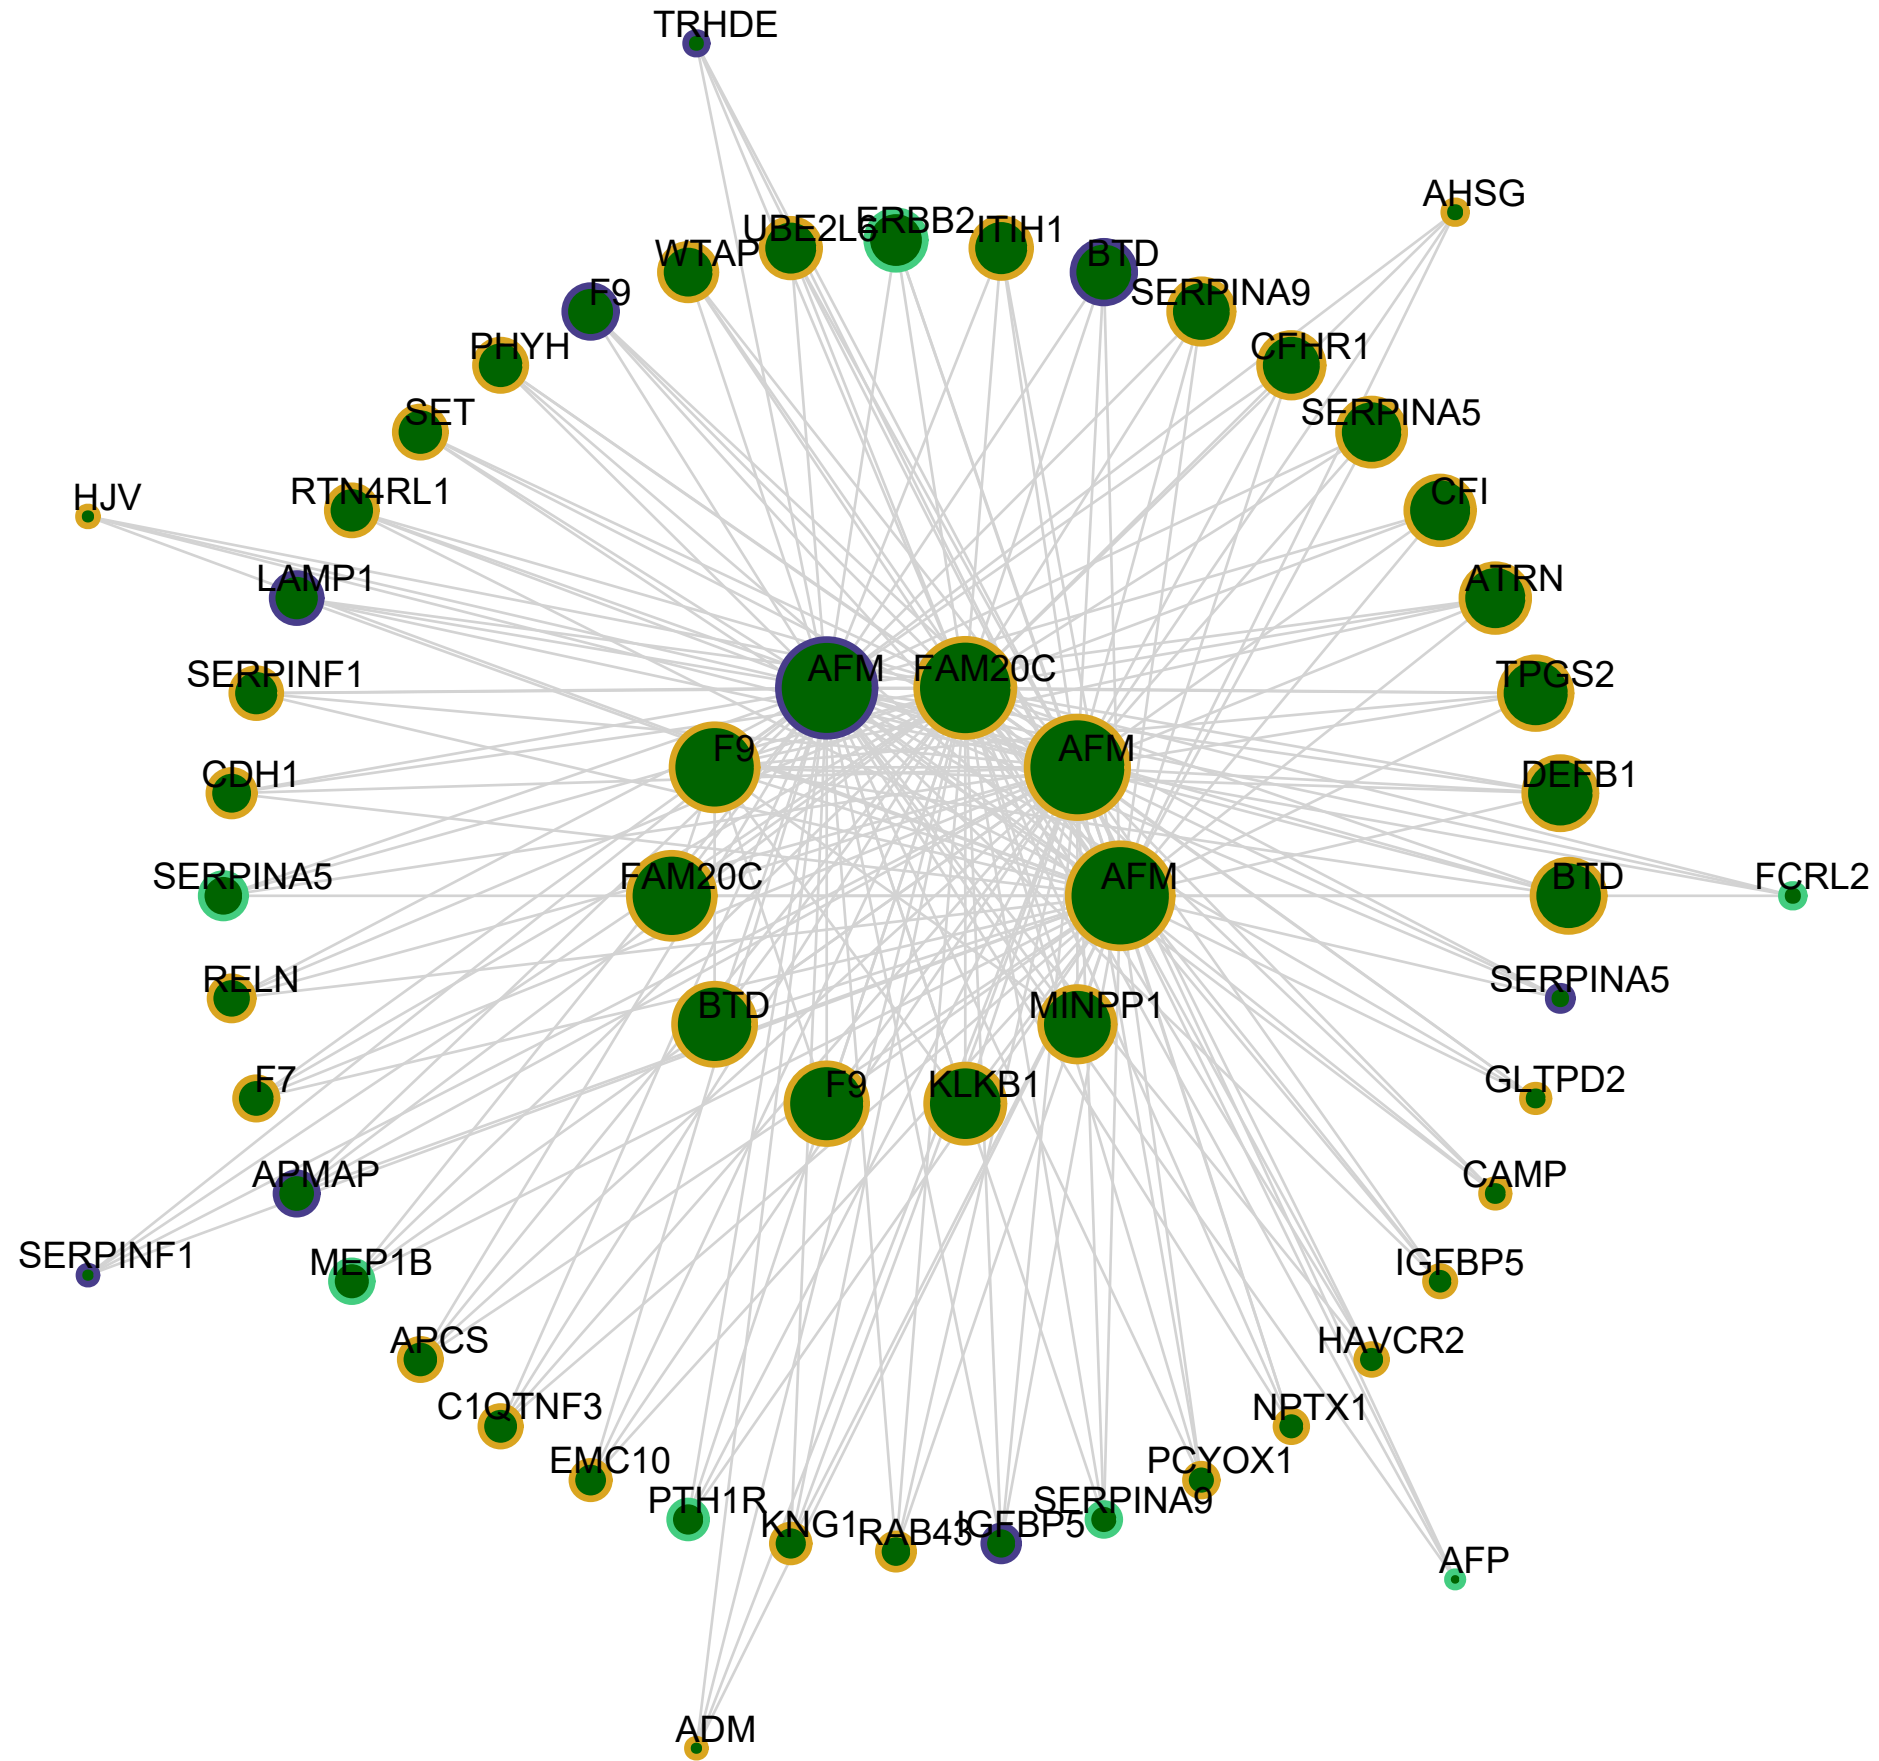

M35 sienna3 module: Ambiguous

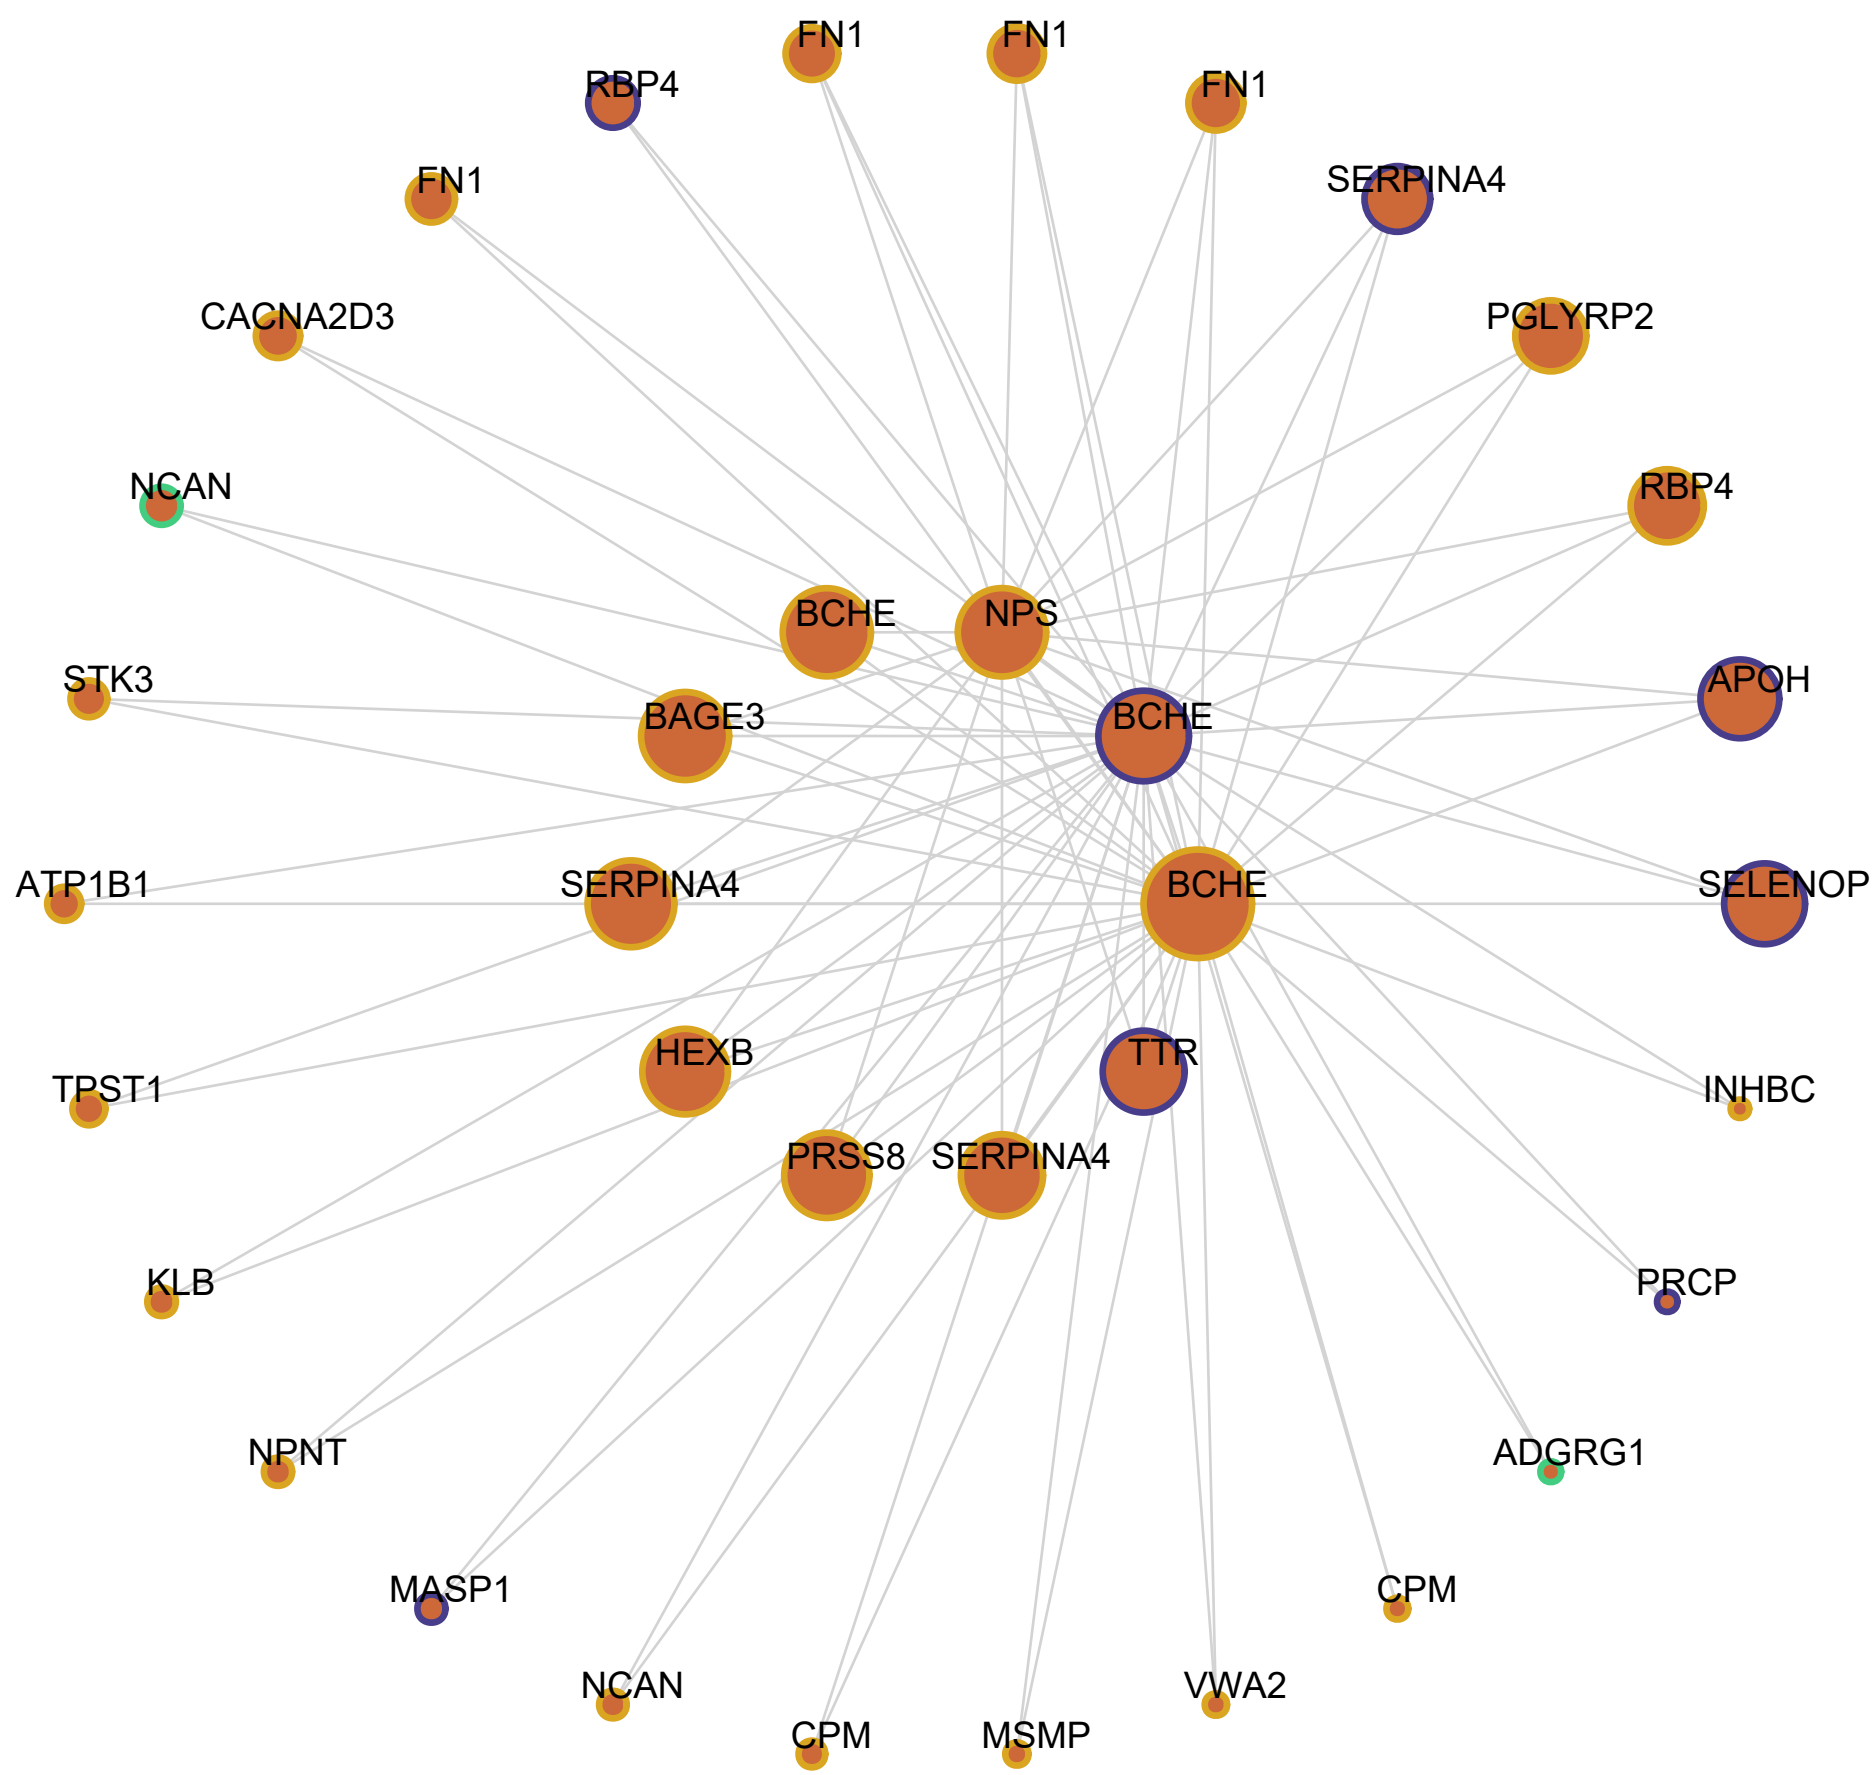







# M24 darkgrey module: Endocytosis

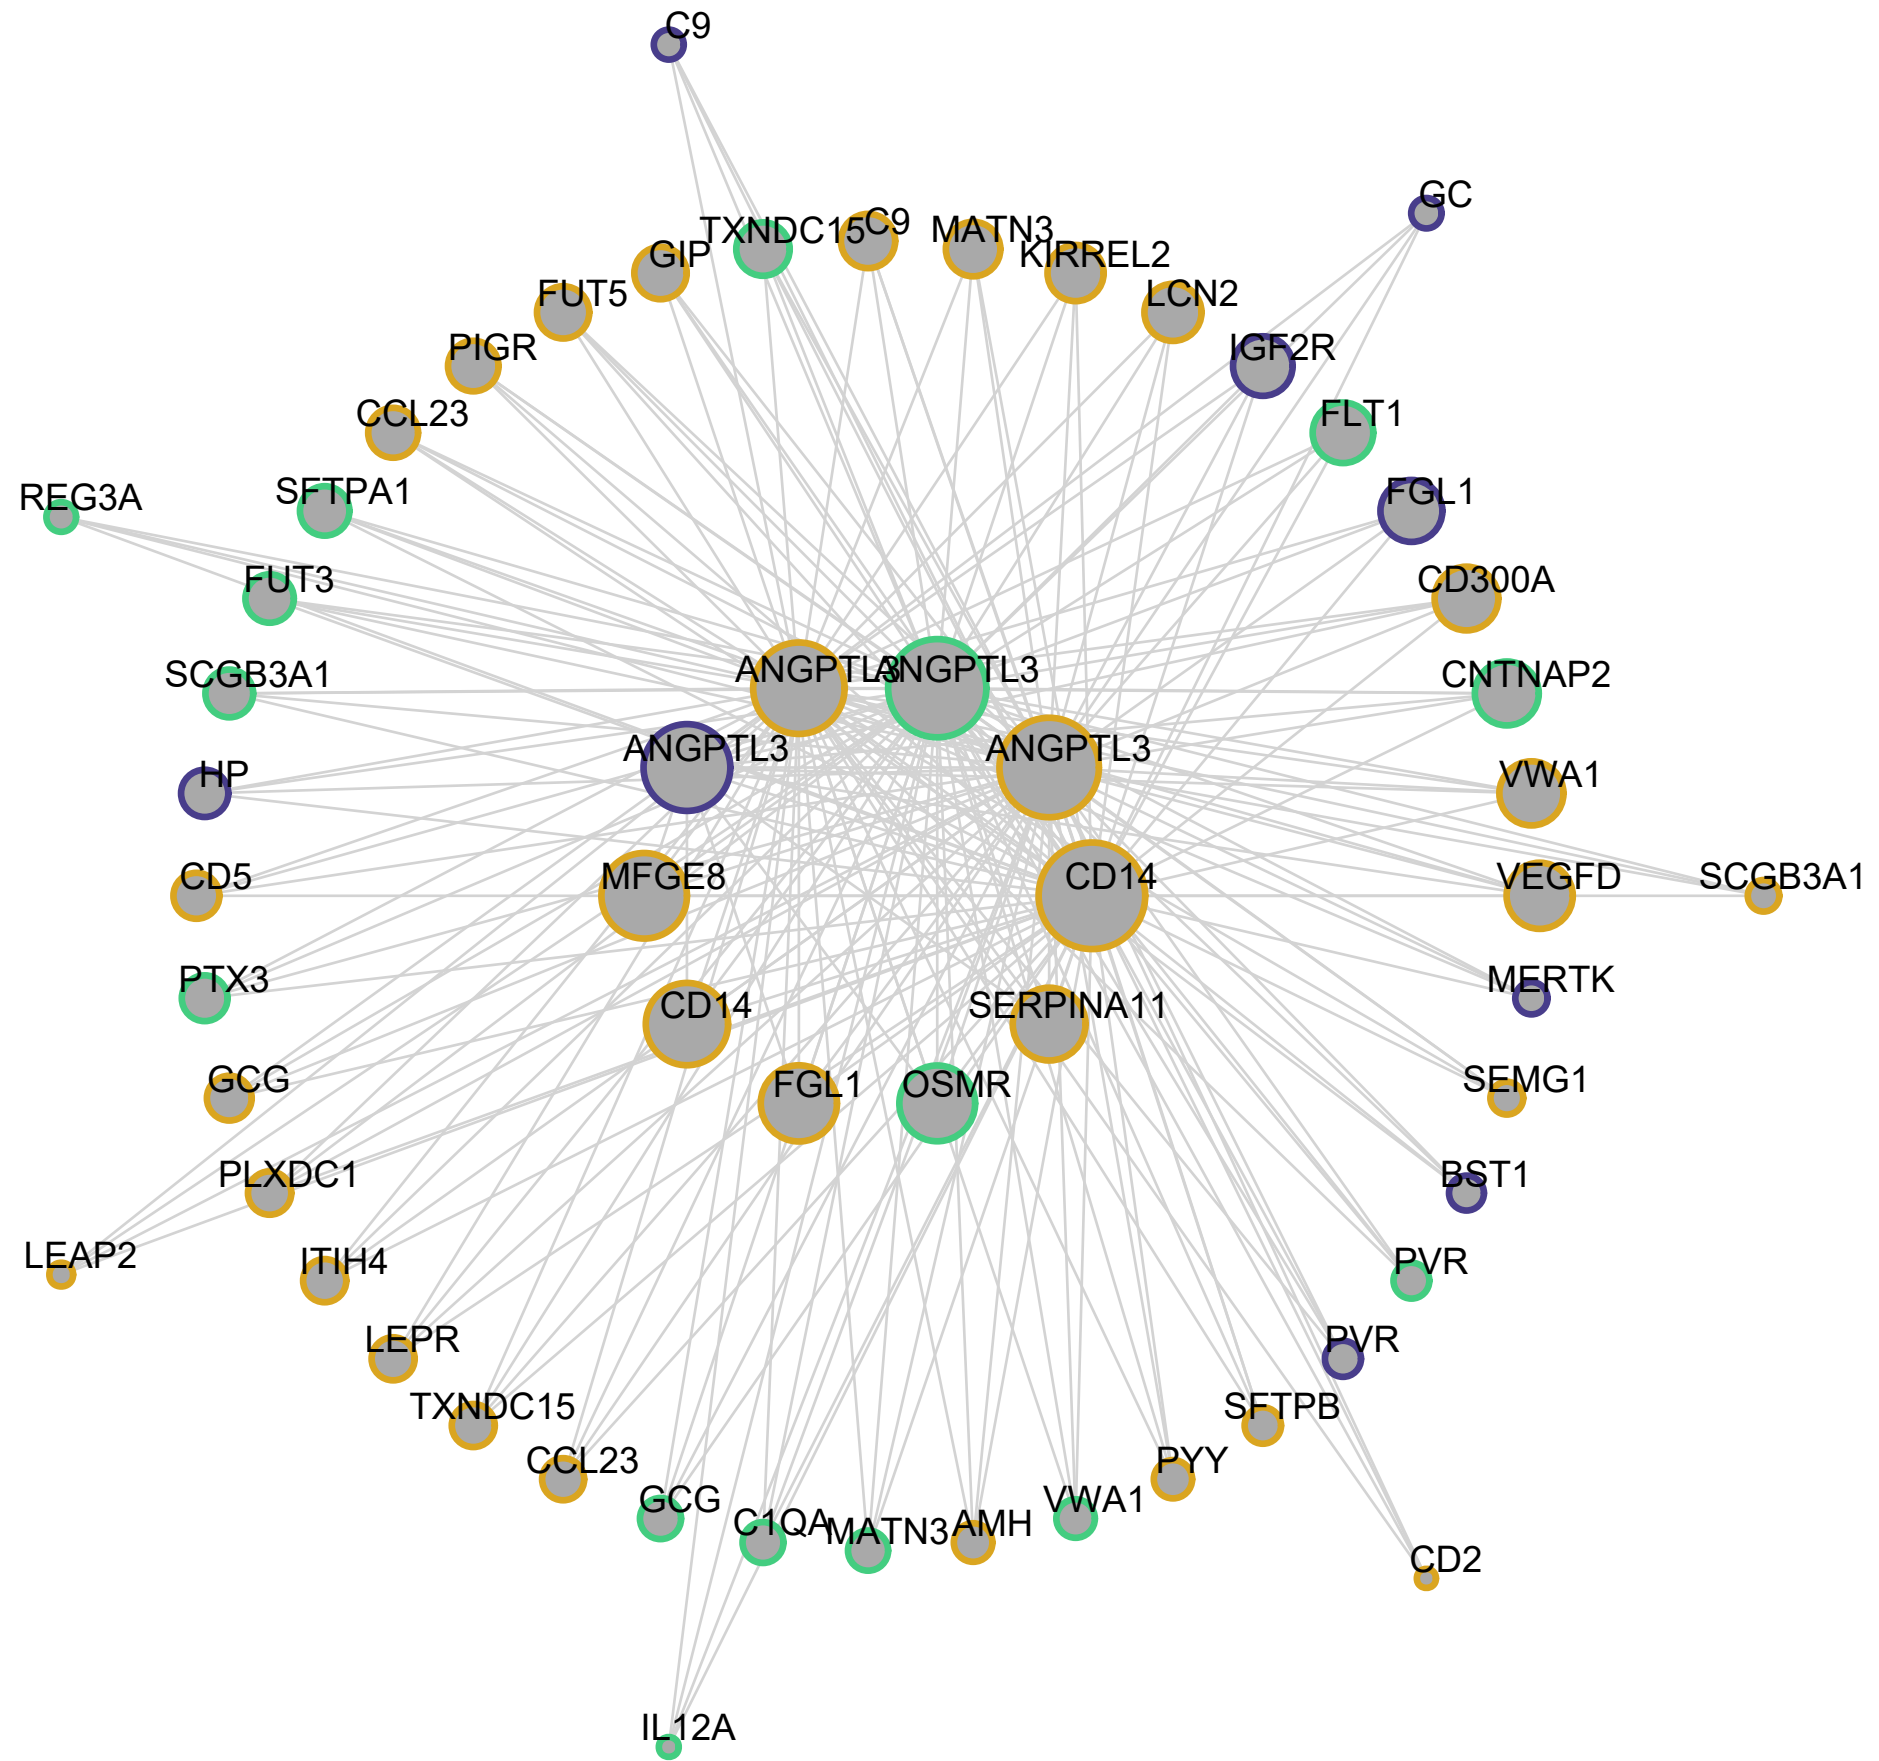



### M33 darkolivegreen module: Adhesion/ECM/Wound Response

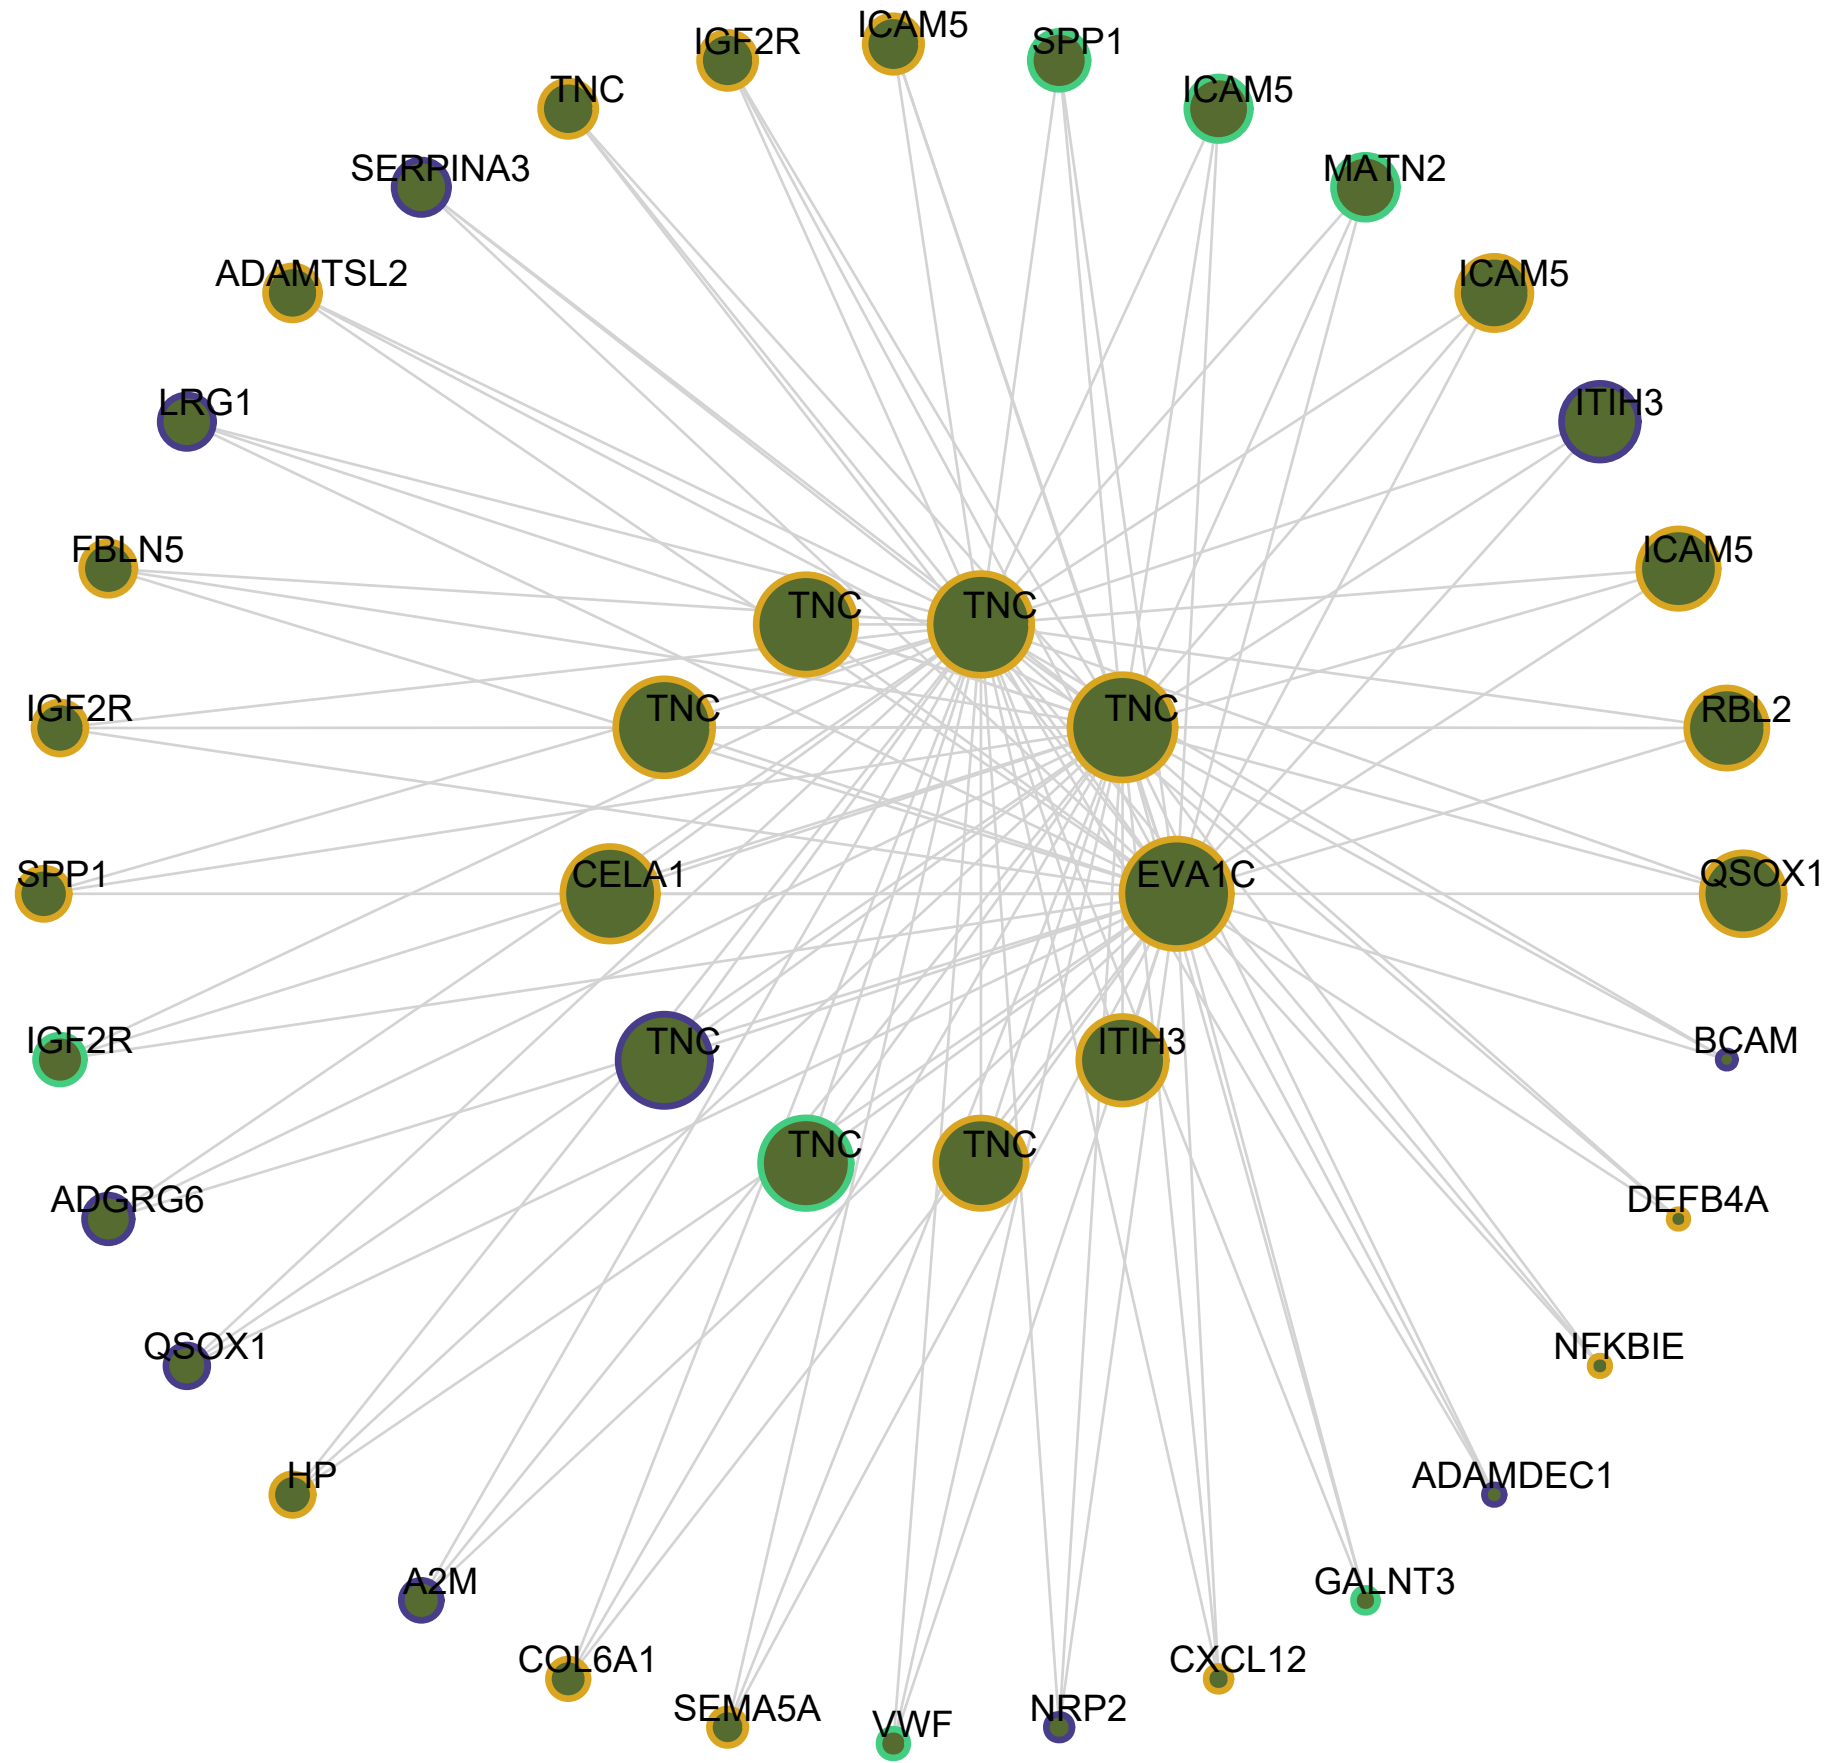





# M12 tan module: Matrisome

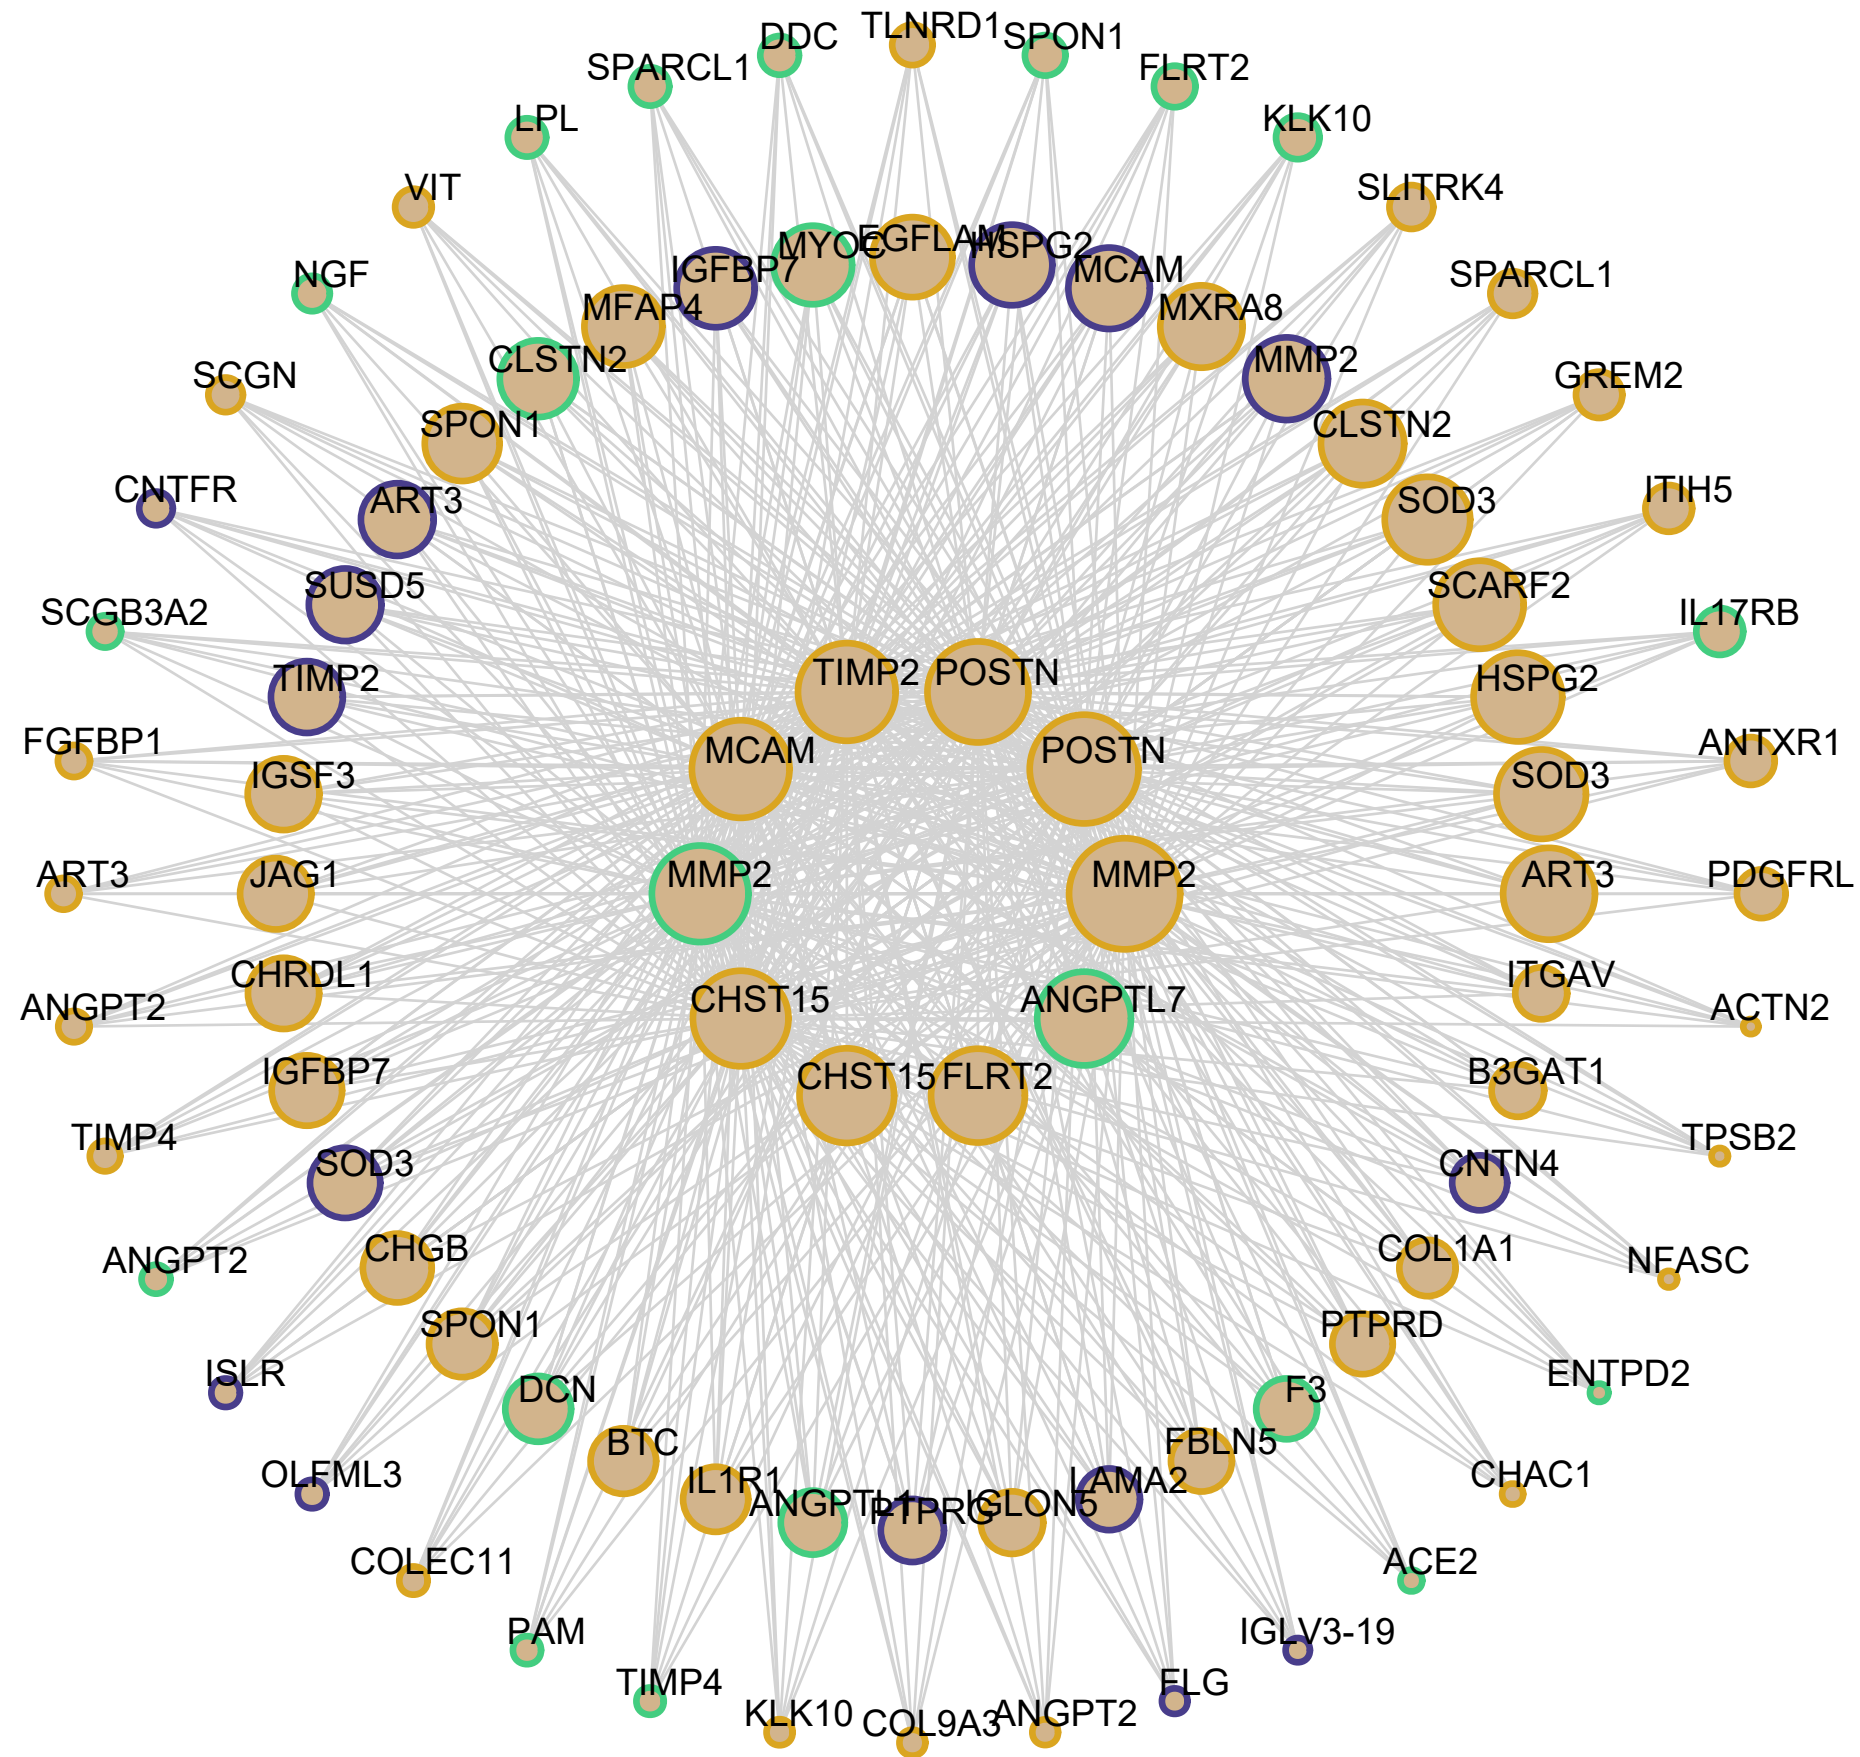



# M18 lightgreen module: Cellular Adhesion/ECM Organization

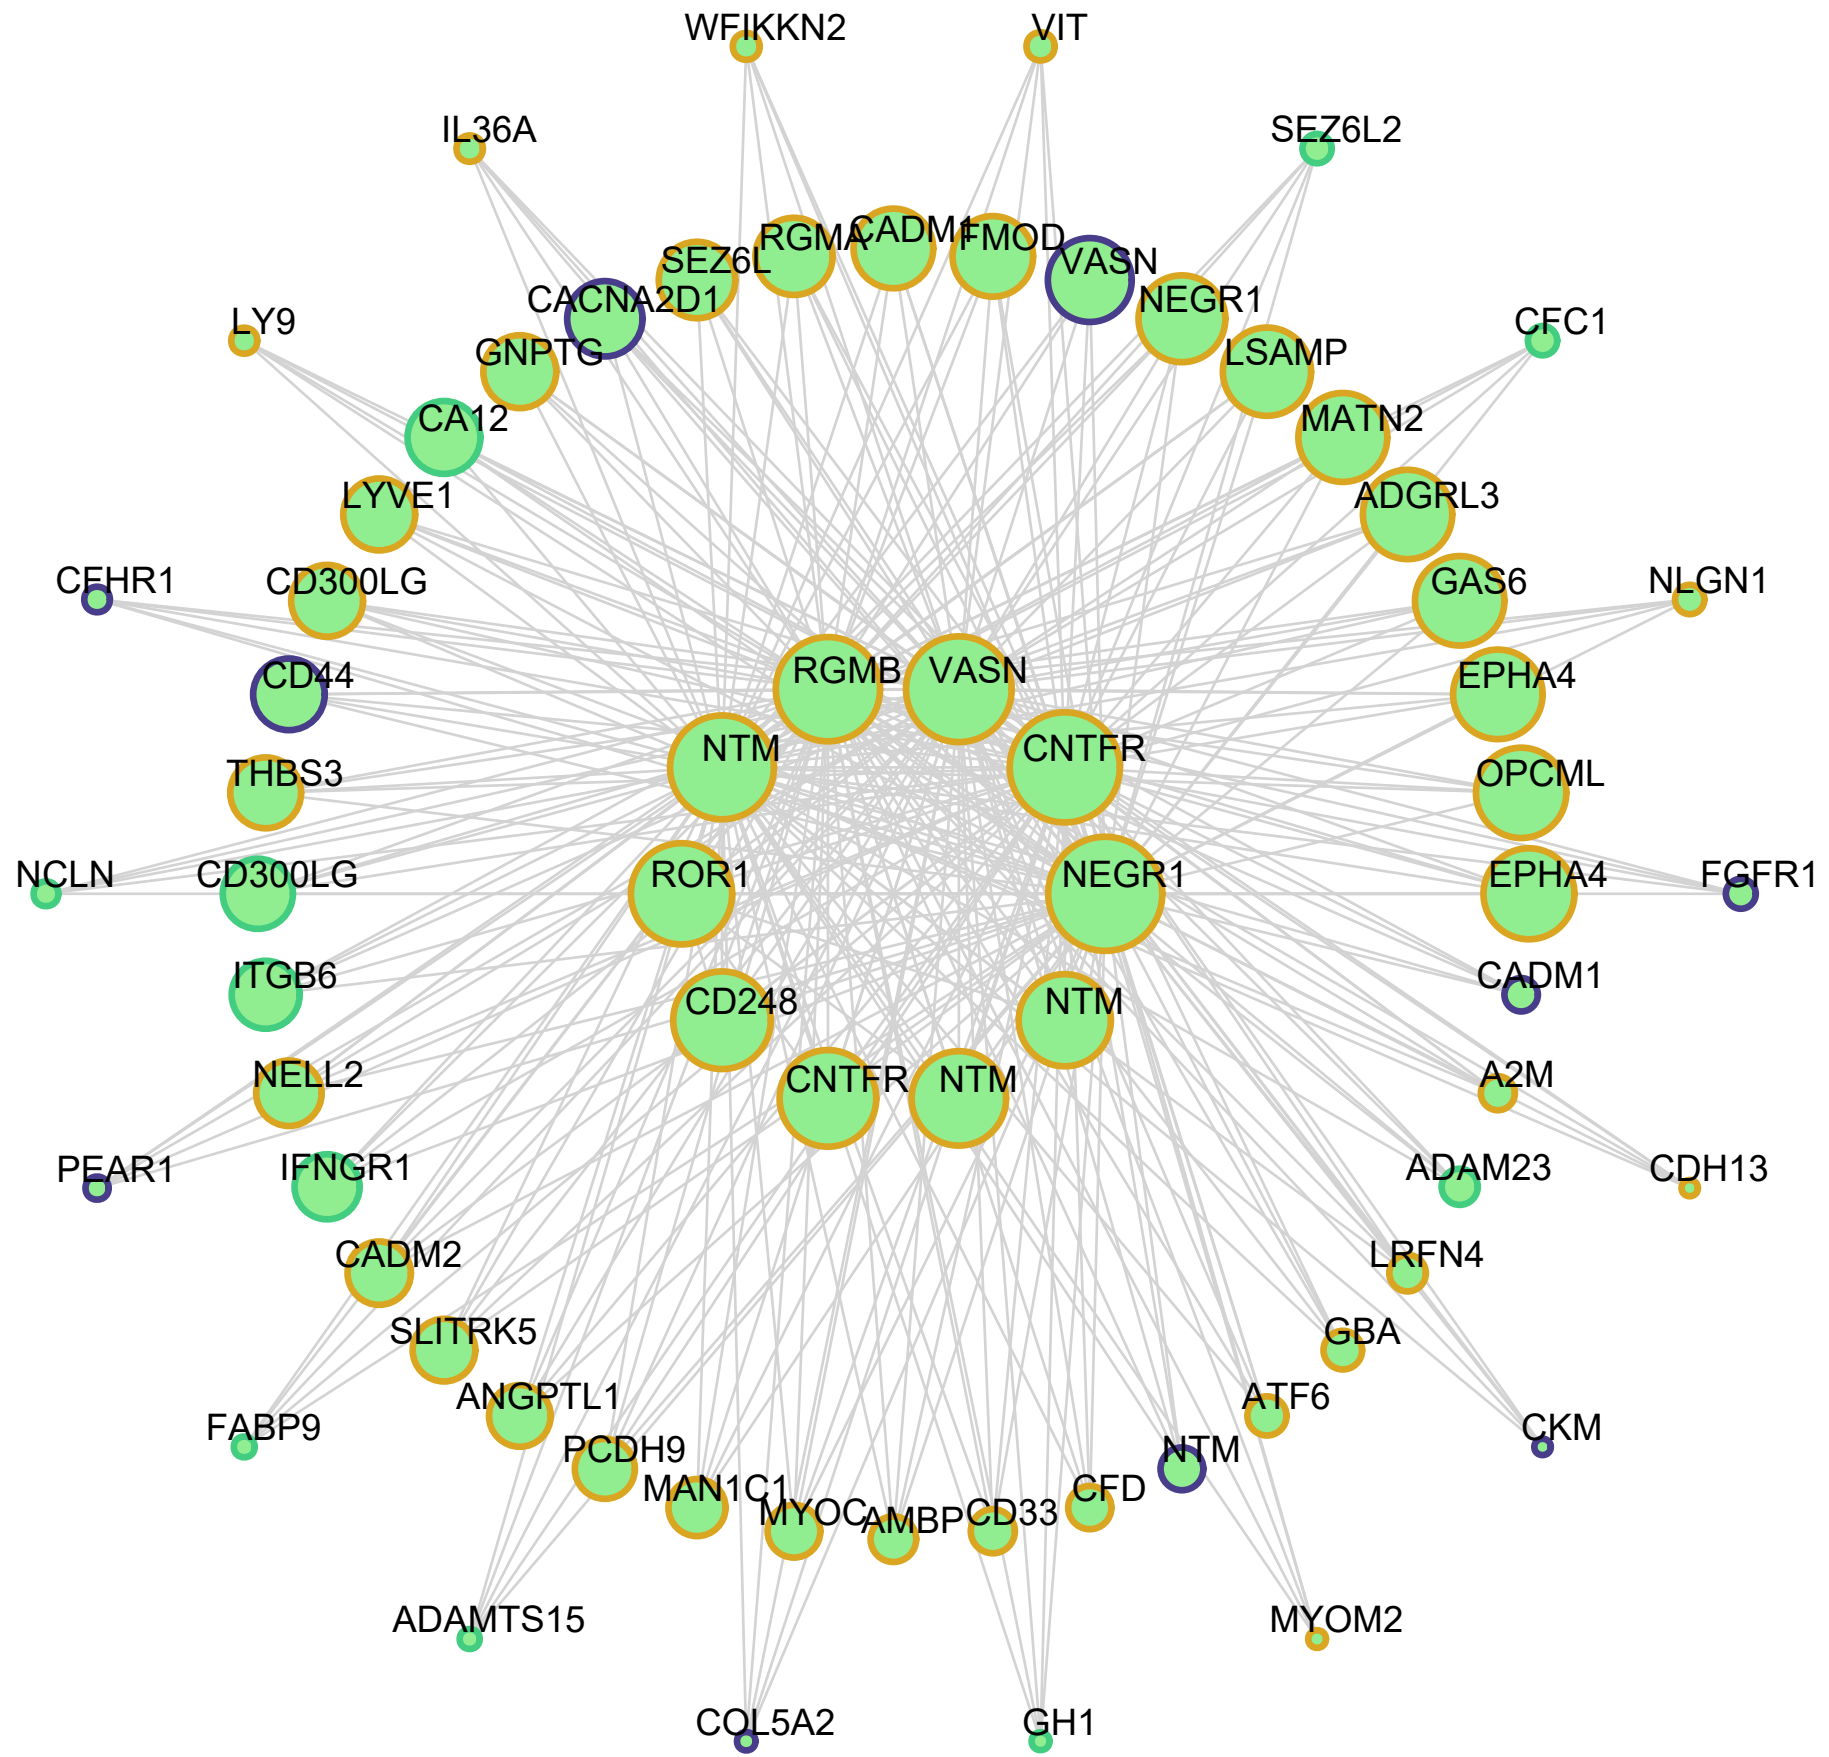







# M23 darkturquoise module: Carbohydrate Binding/ECM

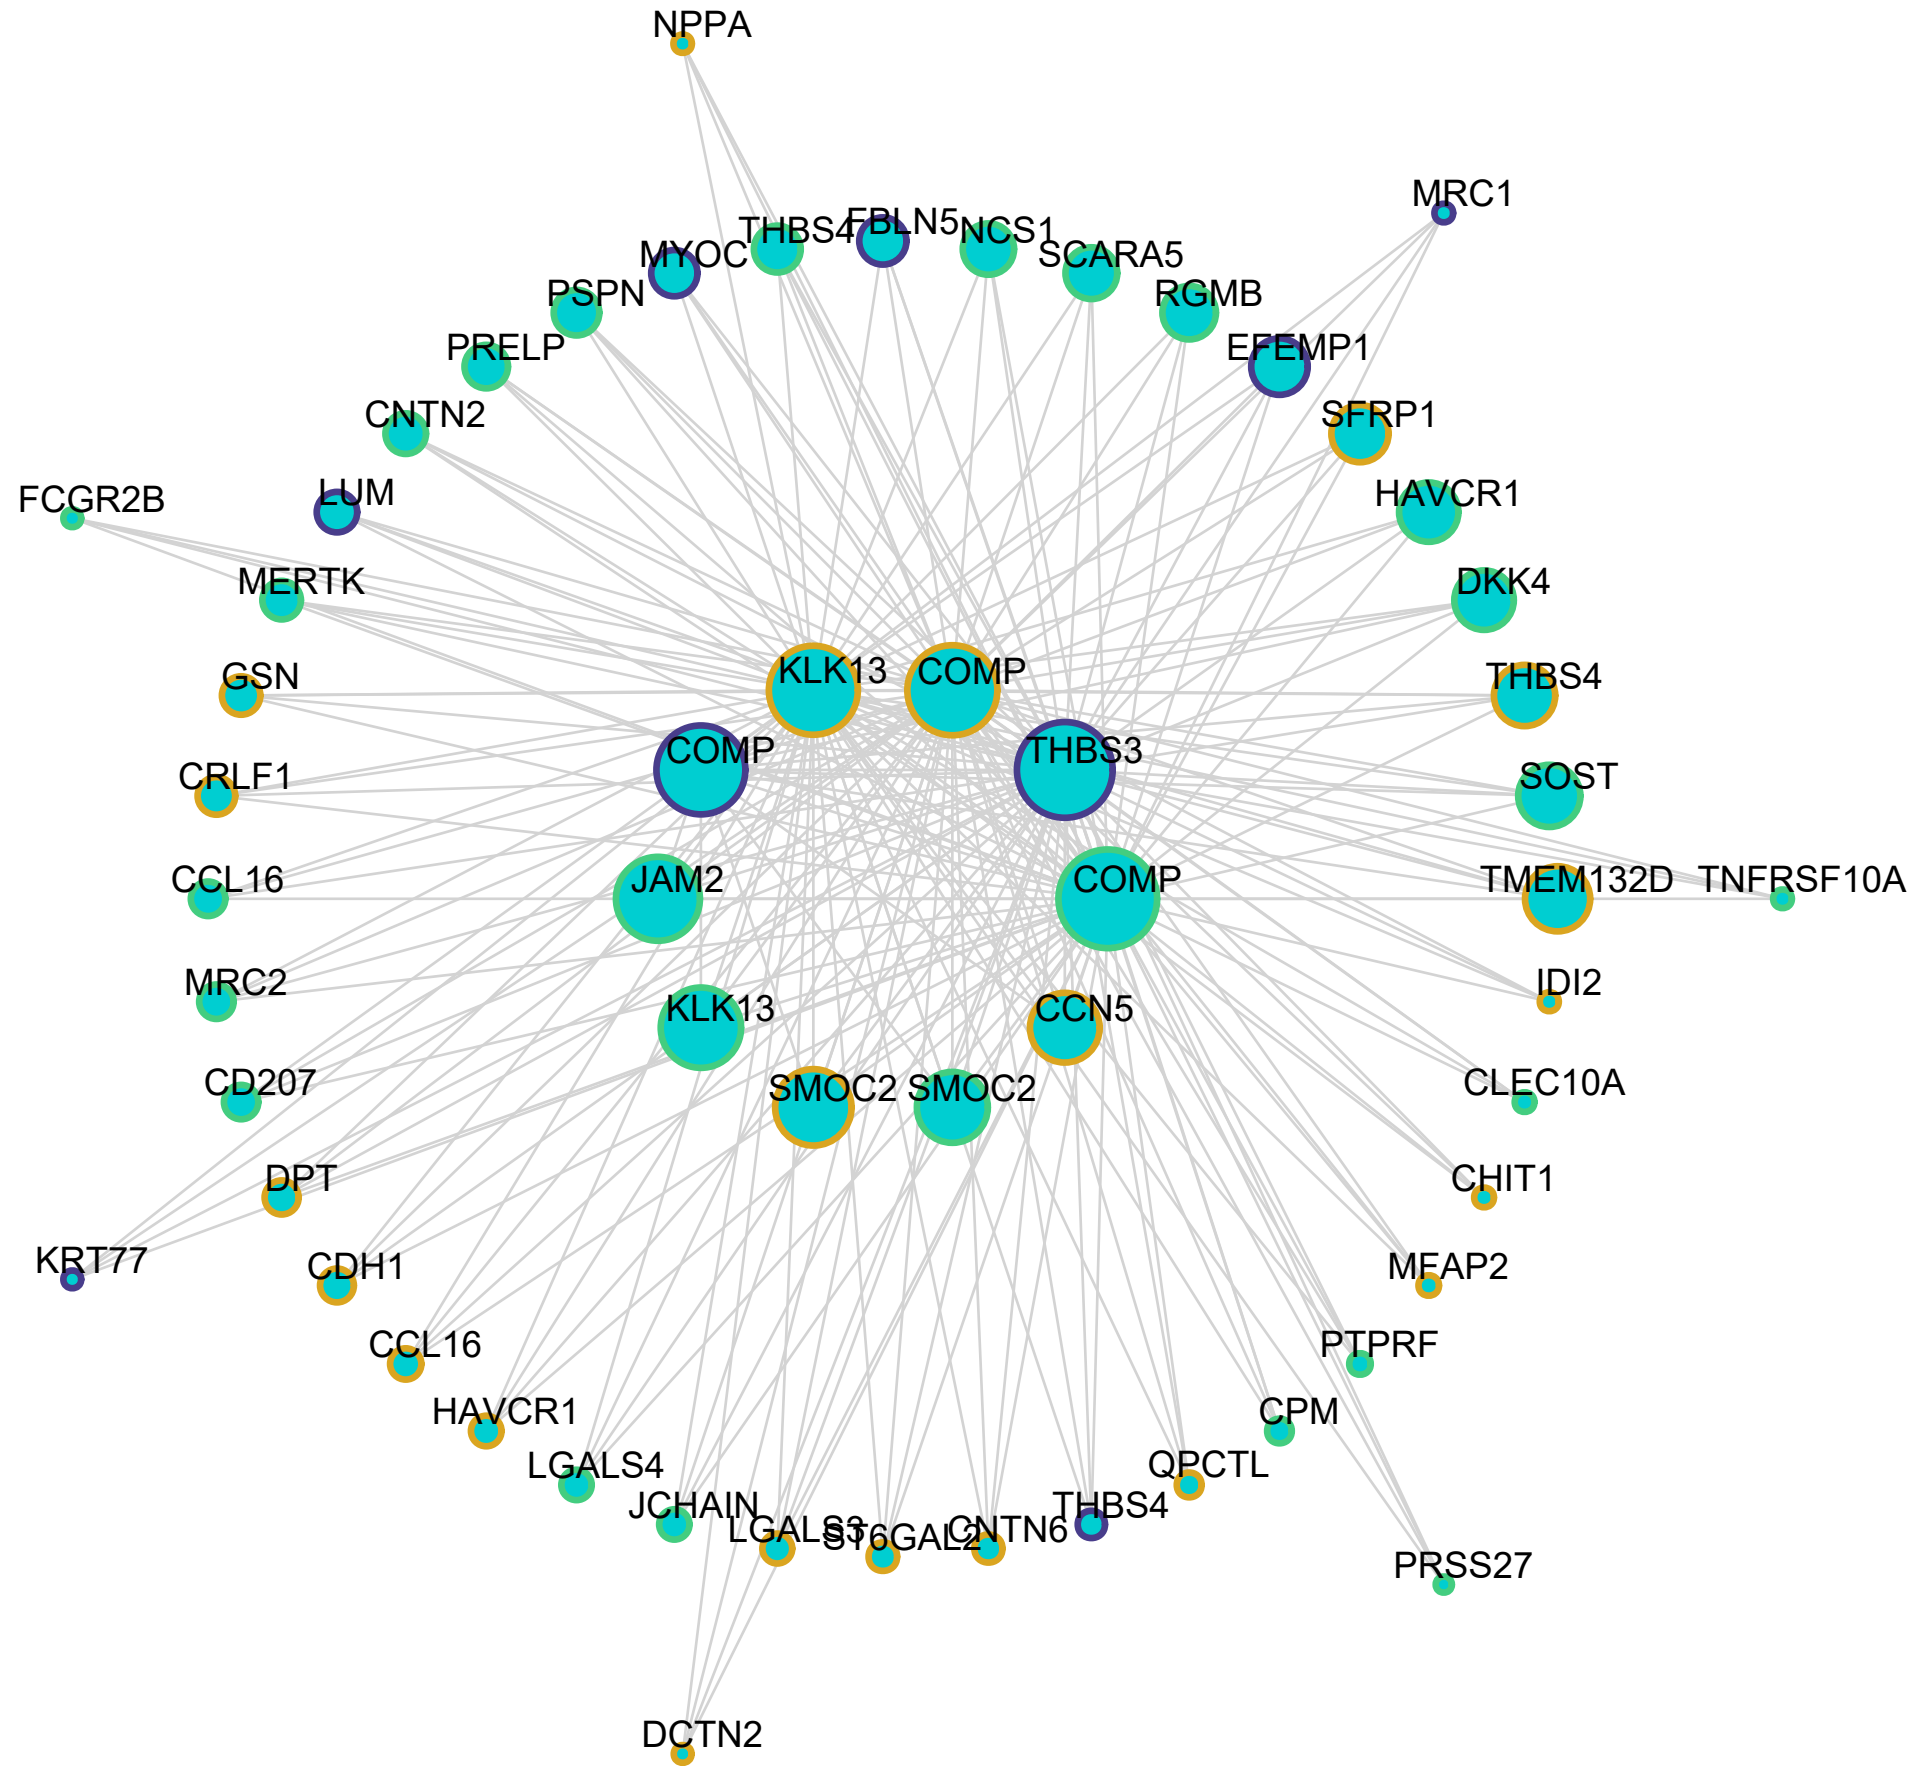

# M20 royalblue module: Digestion

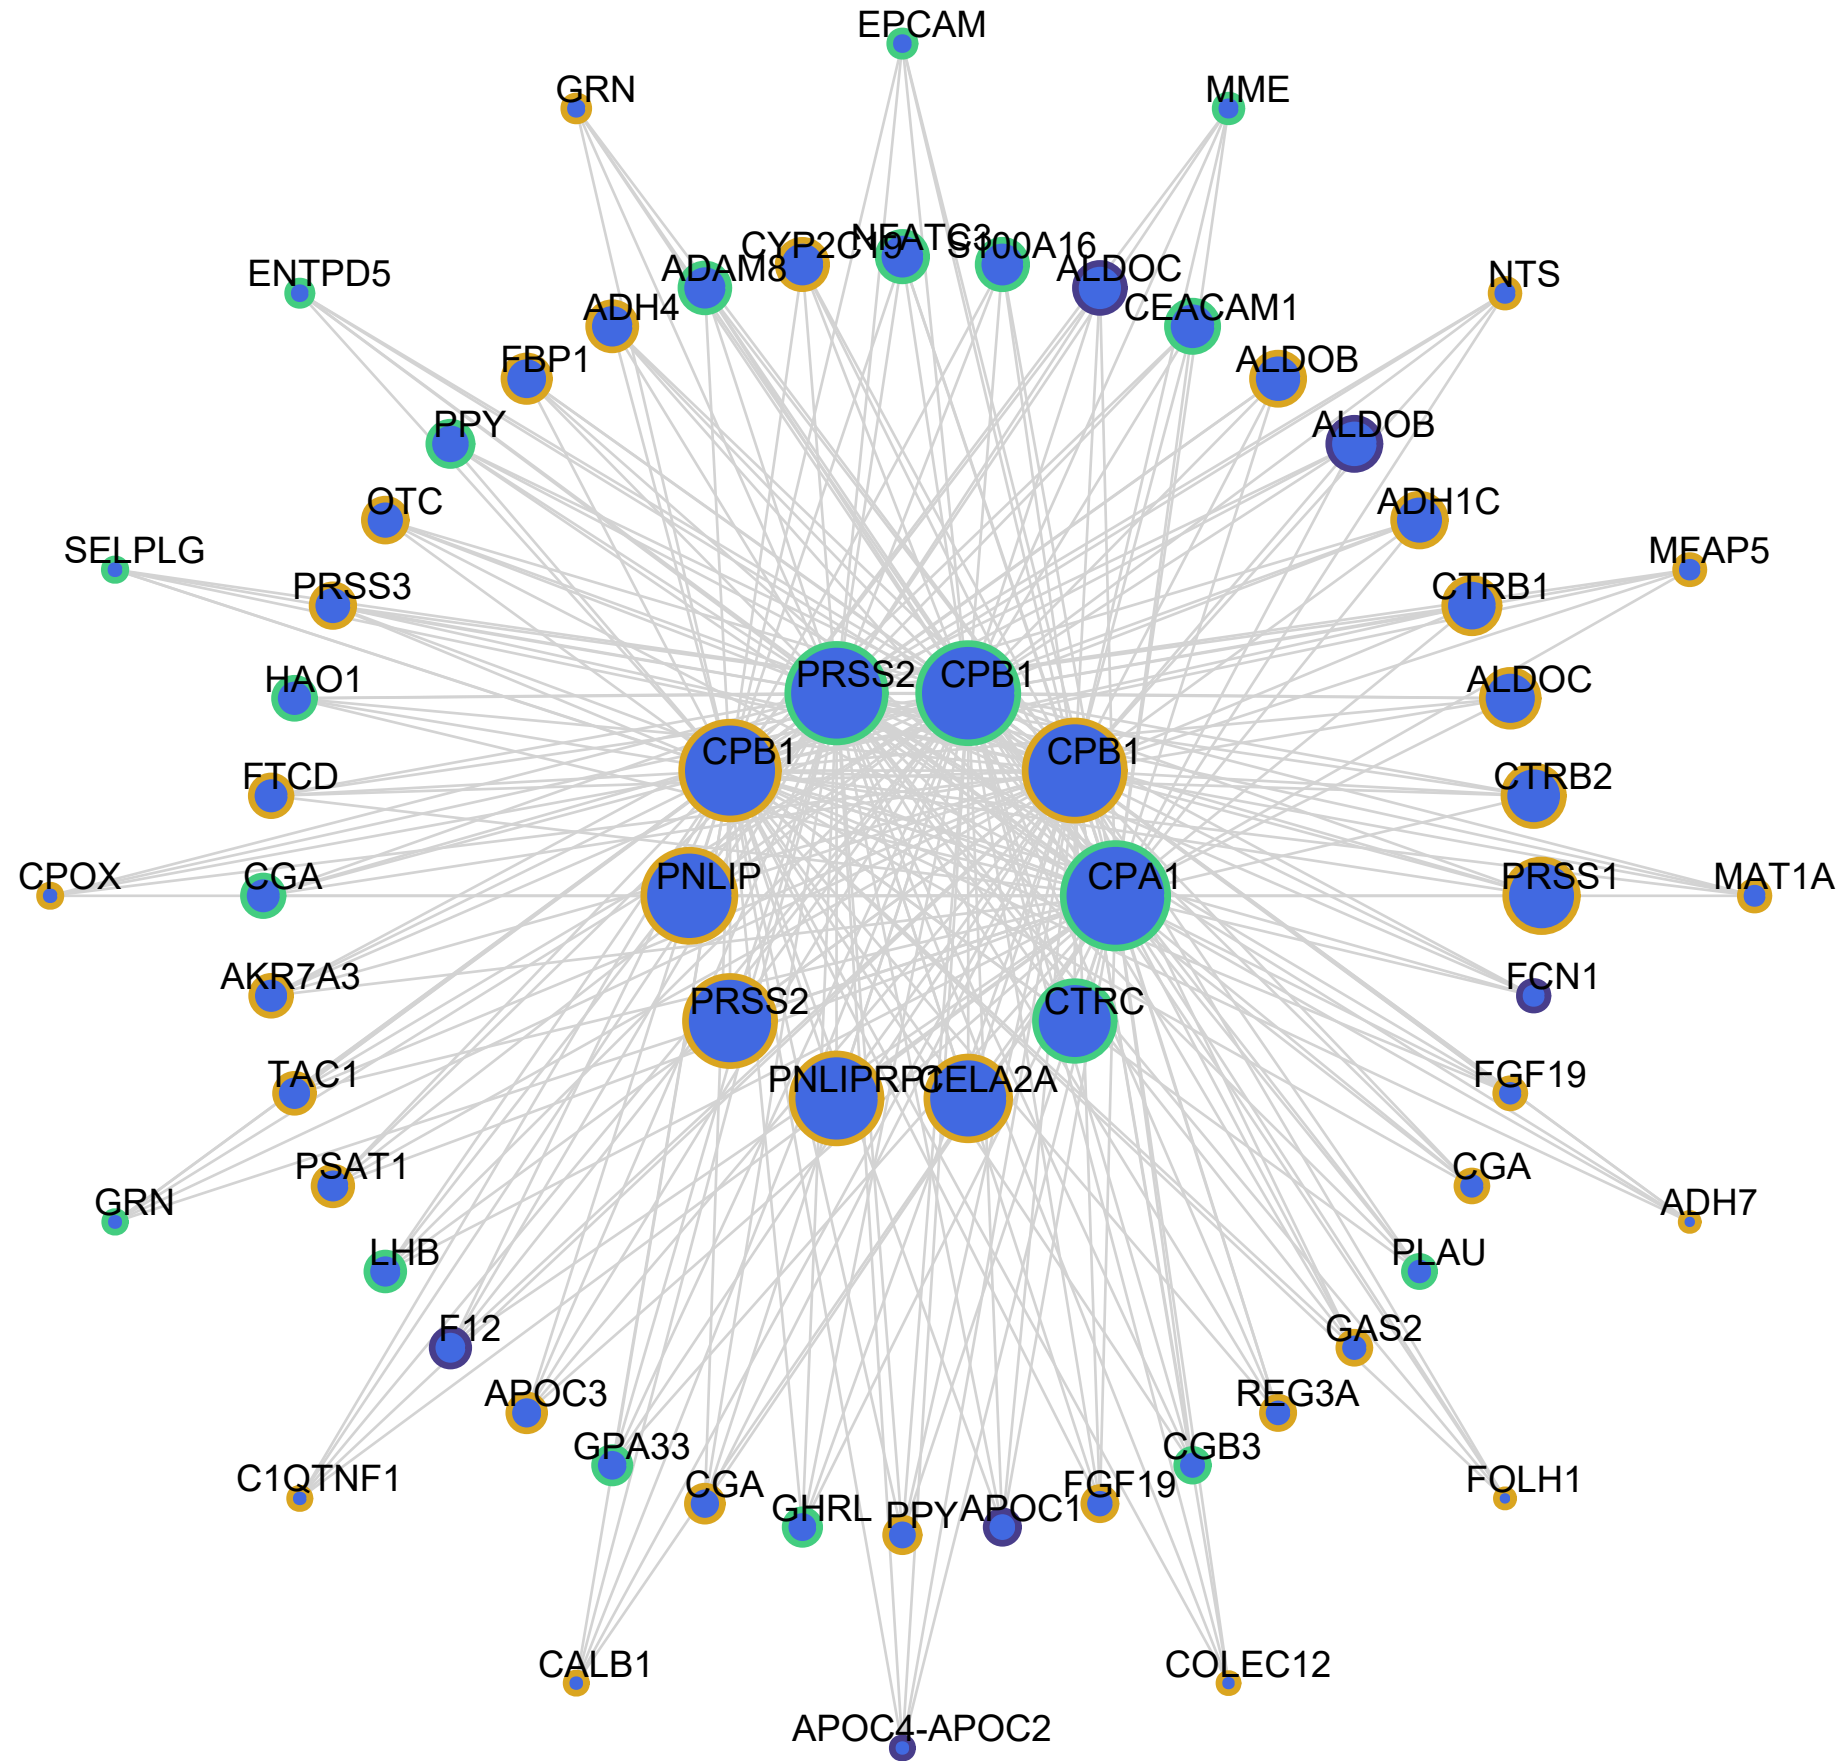



**M26 darkorange**  
Age+Sex-disc.  $p = 0.46$   
Sex-discounted  $p = 0.73$

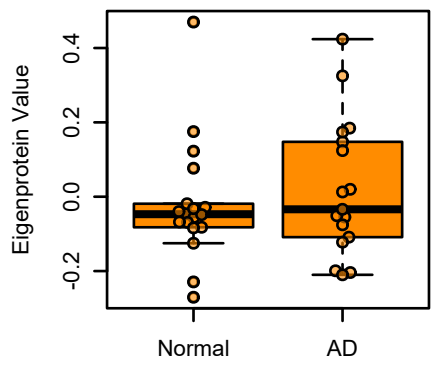

**M26 darkorange**  
Bicarbonate Transport/Peroxidas  
ANOVA  $p = 0.42$

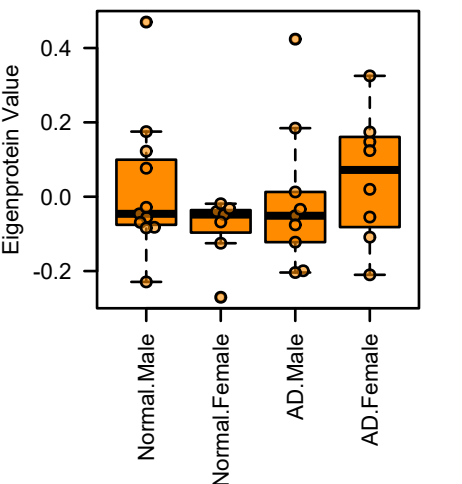

**bicor=-0.047, p=0.79**  
**cor=0.063, p=0.72**

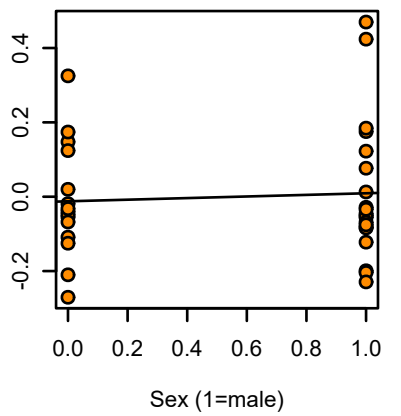

**bicor=-0.031, p=0.9**  
**cor=-0.25, p=0.32**

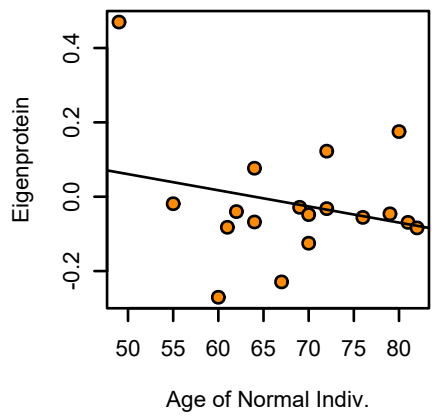

**bicor=-0.15, p=0.56**  
**cor=-0.13, p=0.62**

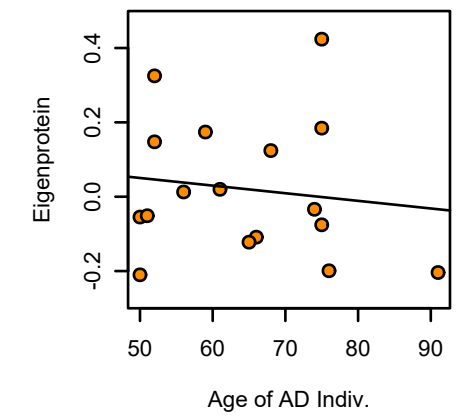

**bicor=0.0059, p=0.97**  
**cor=0.0038, p=0.98**

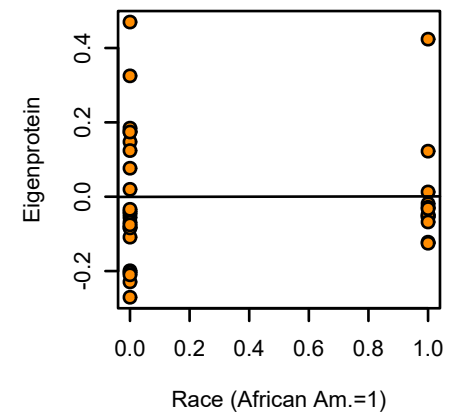

**bicor=-0.088, p=0.61**  
**cor=-0.037, p=0.83**

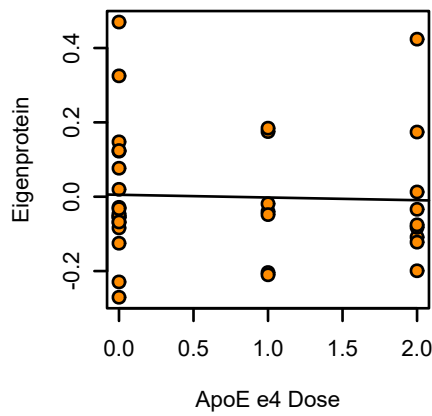

**bicor=-0.14, p=0.45**  
**cor=-0.037, p=0.84**

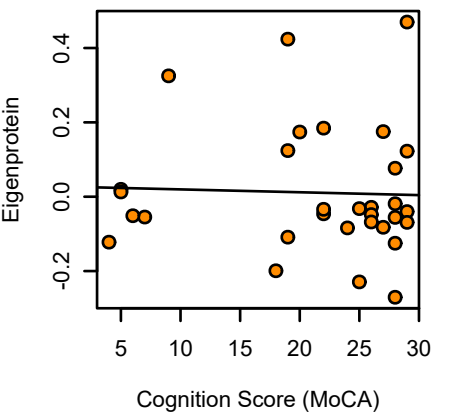

**bicor=0.0086, p=0.96**  
**cor=0.029, p=0.87**

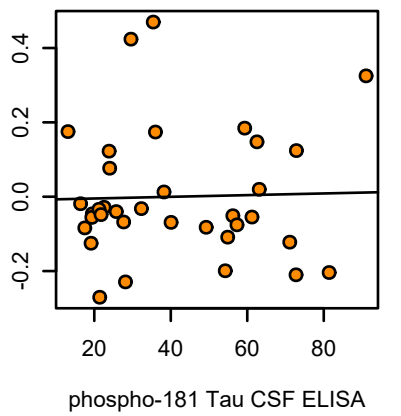

**bicor=0.19, p=0.27**  
**cor=0.041, p=0.82**

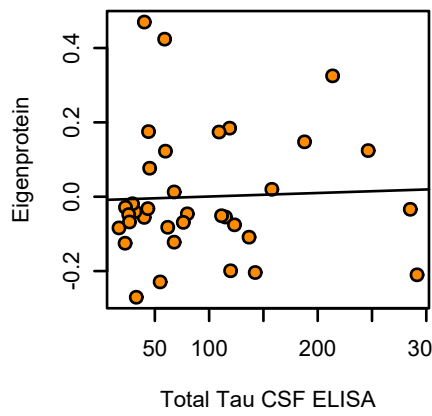

**bicor=-0.16, p=0.36**  
**cor=-0.096, p=0.58**

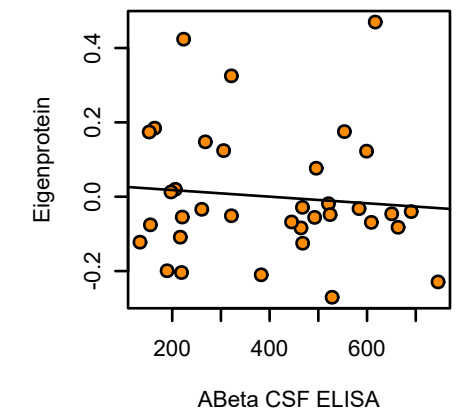

**bicor=-0.17, p=0.33**  
**cor=-0.14, p=0.42**

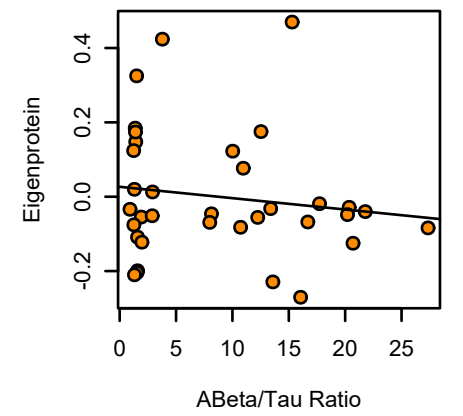

**M4 yellow**  
Age+Sex-disc.  $p = 0.022$   
Sex-discounted  $p = 0.022$

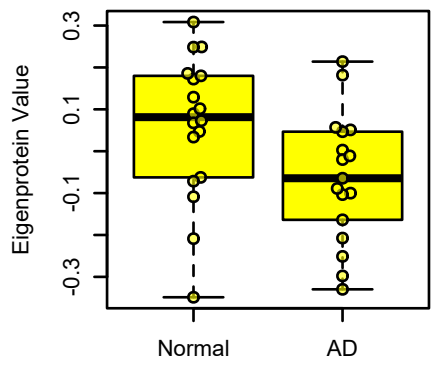

**M4 yellow**  
T Cell Regulation  
ANOVA  $p = 0.051$

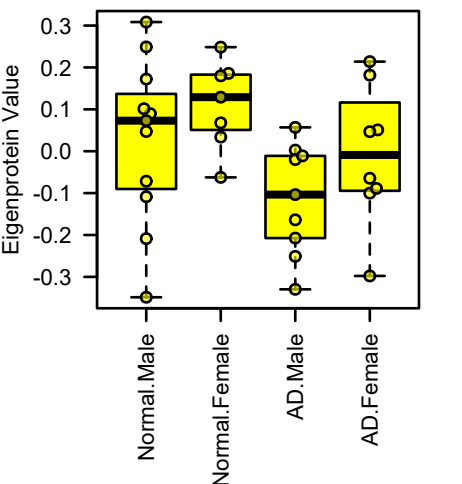

**bicor=-0.25, p=0.16**  
**cor=-0.25, p=0.15**

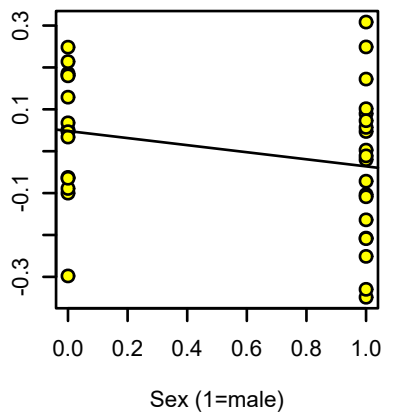

**bicor=-0.36, p=0.14**  
**cor=-0.4, p=0.1**

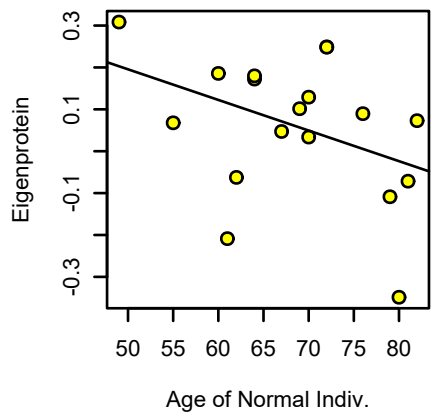

**bicor=-0.33, p=0.19**  
**cor=-0.33, p=0.2**

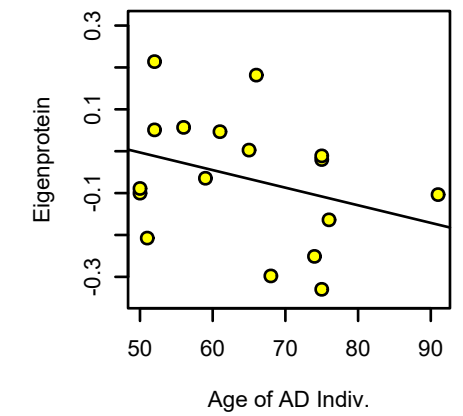

**bicor=0.26, p=0.13**  
**cor=0.27, p=0.12**

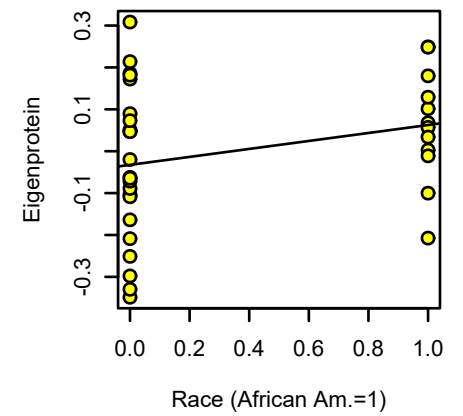

**bicor=-0.34, p=0.044**  
**cor=-0.34, p=0.046**

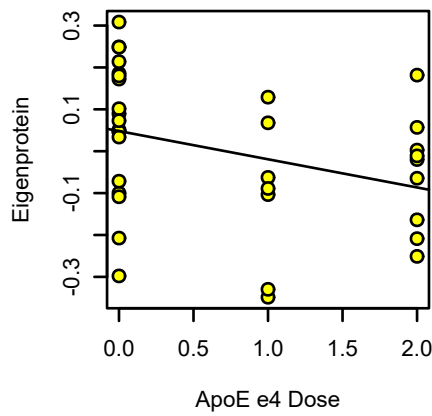

**bicor=0.36, p=0.045**  
**cor=0.17, p=0.36**

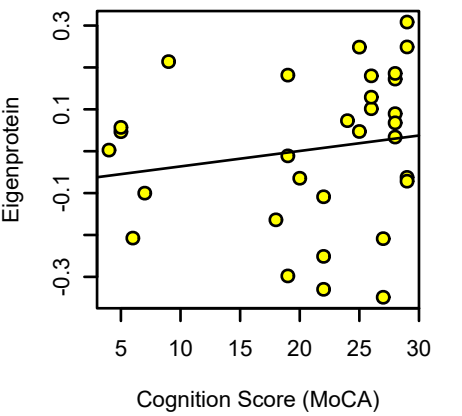

**bicor=-0.28, p=0.1**  
**cor=-0.21, p=0.23**

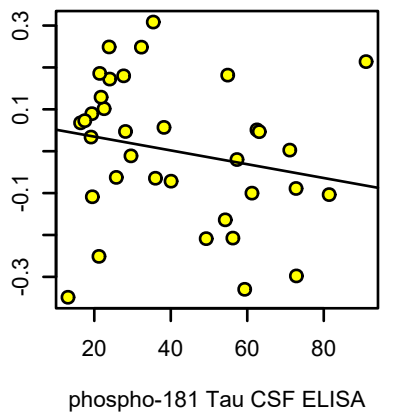

**bicor=-0.42, p=0.011**  
**cor=-0.39, p=0.021**

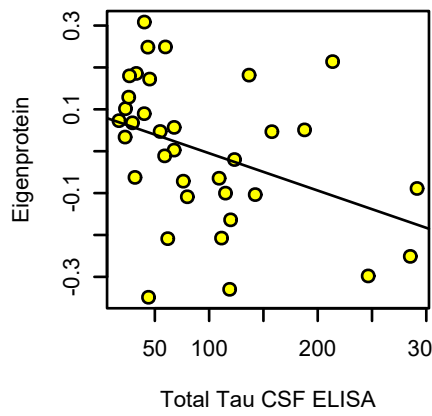

**bicor=0.3, p=0.084**  
**cor=0.26, p=0.13**

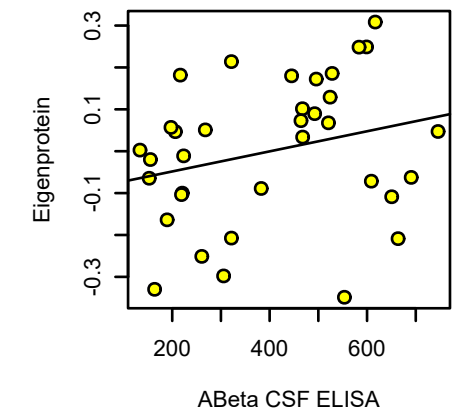

**bicor=0.39, p=0.021**  
**cor=0.39, p=0.021**

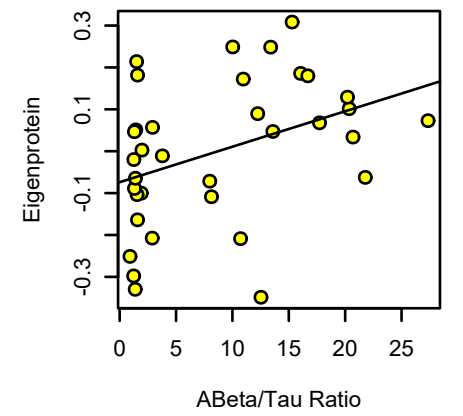

**M9 magenta**  
Age+Sex-disc.  $p = 0.21$   
Sex-discounted  $p = 0.1$

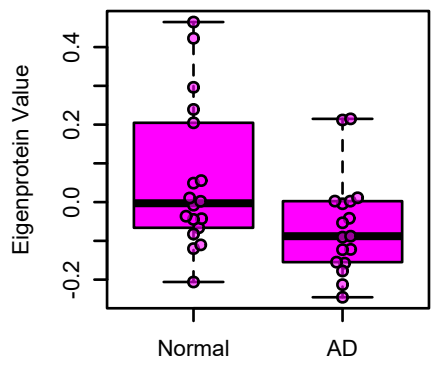

**M9 magenta**  
Leukocyte Chemotaxis  
ANOVA  $p = 0.29$

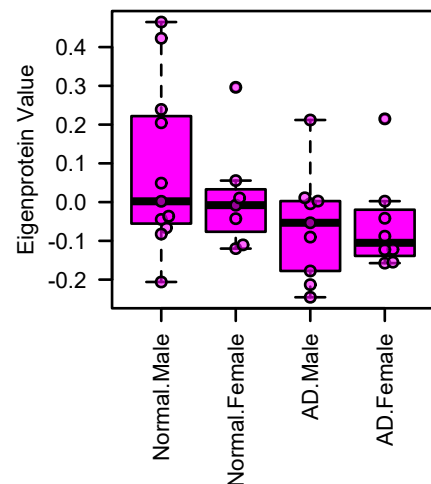

**bicor=0.075, p=0.67**  
**cor=0.13, p=0.46**

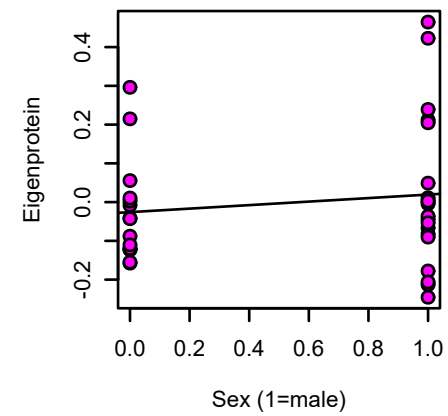

**bicor=0.15, p=0.55**  
**cor=-0.16, p=0.53**

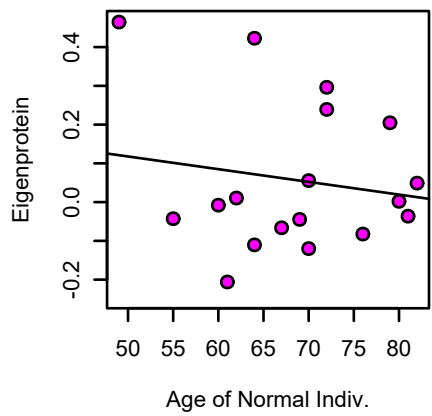

**bicor=0.37, p=0.15**  
**cor=0.38, p=0.13**

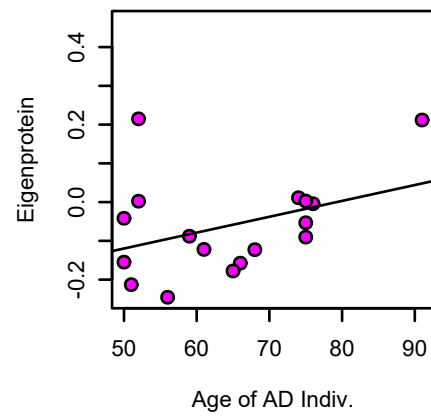

**bicor=-0.12, p=0.49**  
**cor=-0.14, p=0.42**

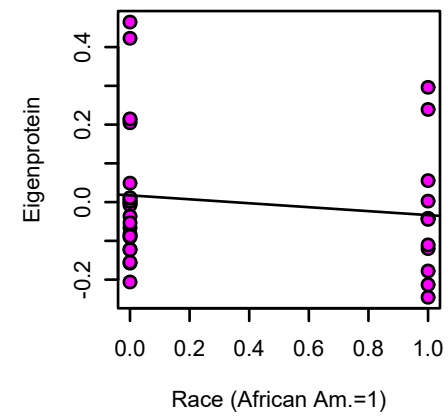

**bicor=-0.38, p=0.022**  
**cor=-0.4, p=0.017**

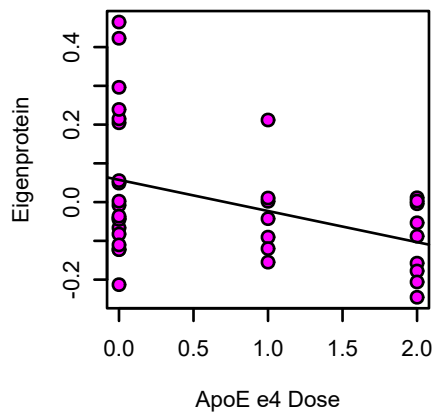

**bicor=0.22, p=0.23**  
**cor=0.39, p=0.03**

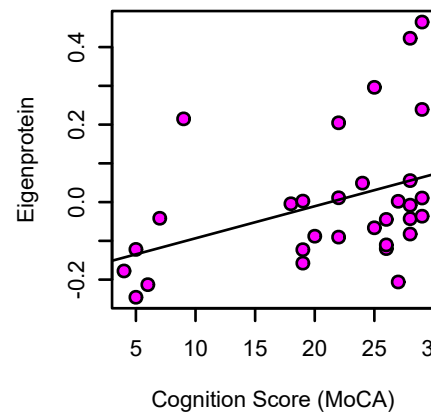

**bicor=-0.21, p=0.23**  
**cor=-0.18, p=0.3**

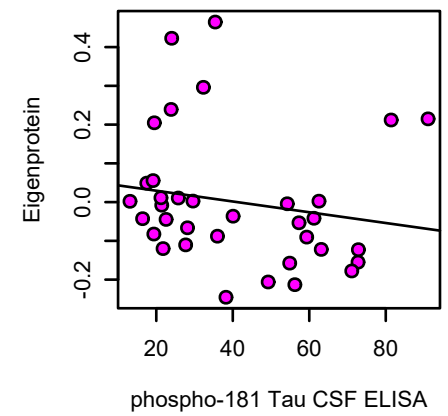

**bicor=-0.069, p=0.69**  
**cor=-0.16, p=0.36**

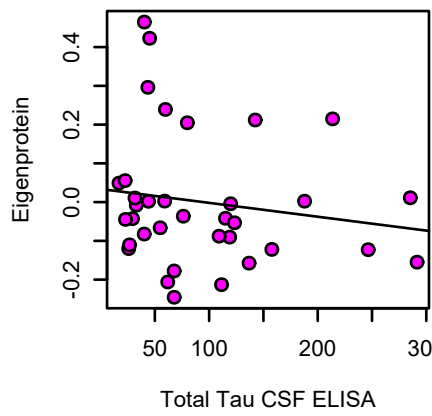

**bicor=0.27, p=0.11**  
**cor=0.34, p=0.046**

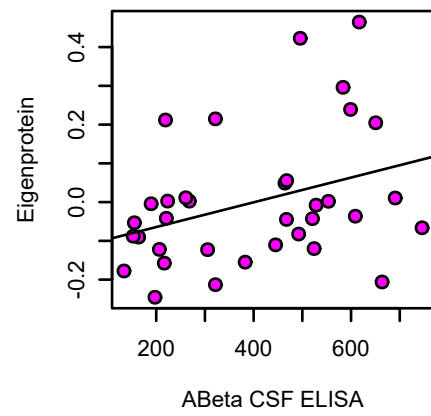

**bicor=0.23, p=0.19**  
**cor=0.22, p=0.2**

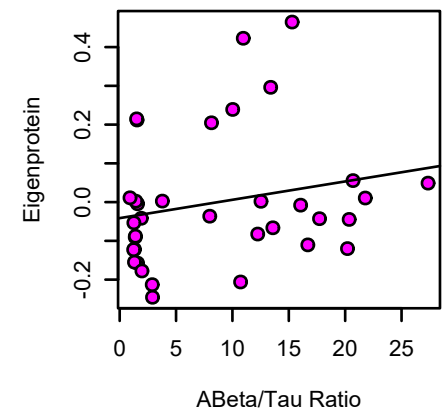

**M1 turquoise**  
Age+Sex-disc.  $p = 0.00033$   
Sex-discounted  $p = 9.3e-05$

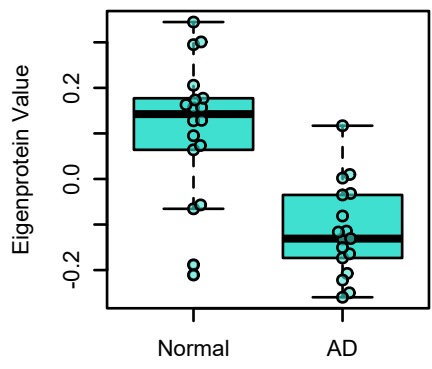

**M1 turquoise**  
Cellular Metabolism/Intracellular Tran  
ANOVA  $p = 0.00099$

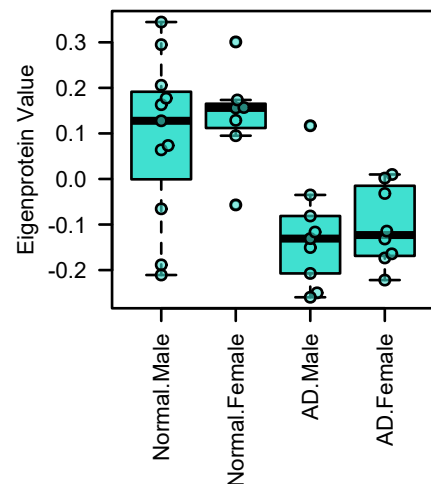

**bicor=-0.049, p=0.78**  
**cor=-0.044, p=0.8**

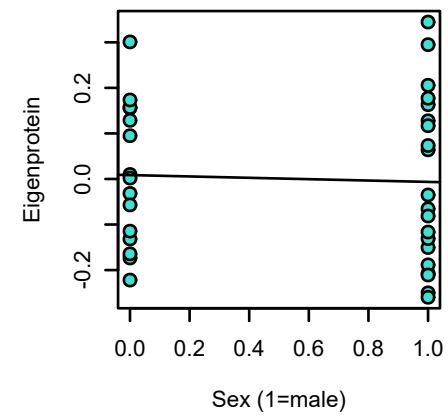

**bicor=-0.18, p=0.48**  
**cor=-0.11, p=0.66**

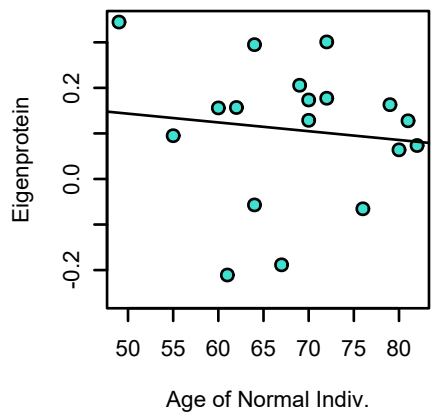

**bicor=-0.27, p=0.29**  
**cor=-0.23, p=0.37**

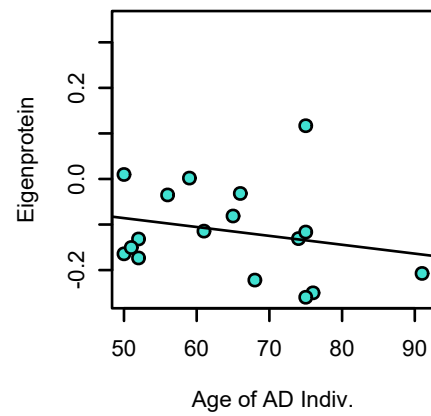

**bicor=0.32, p=0.061**  
**cor=0.31, p=0.07**

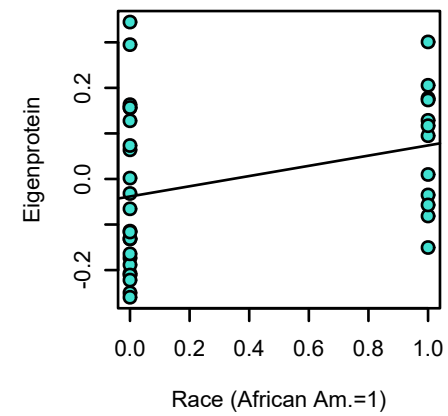

**bicor=-0.32, p=0.062**  
**cor=-0.33, p=0.053**

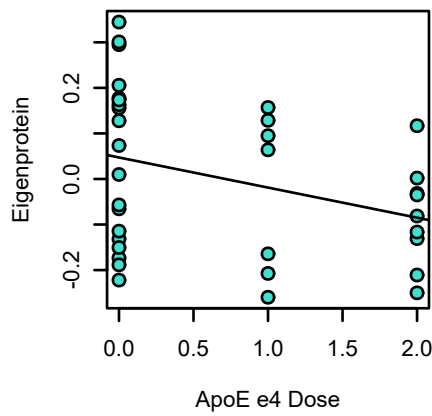

**bicor=0.55, p=0.0014**  
**cor=0.48, p=0.0063**

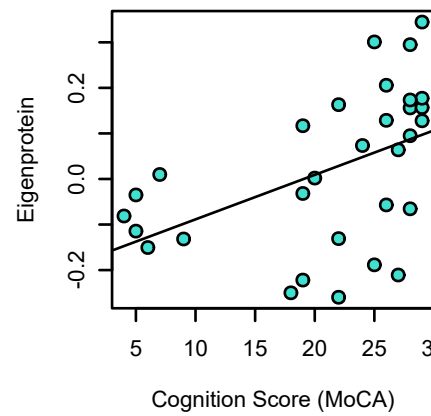

**bicor=-0.61, p=0.00011**  
**cor=-0.65, p=2.4e-05**

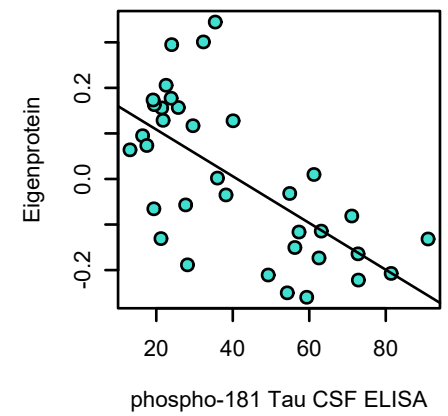

**bicor=-0.6, p=0.00013**  
**cor=-0.62, p=7.1e-05**

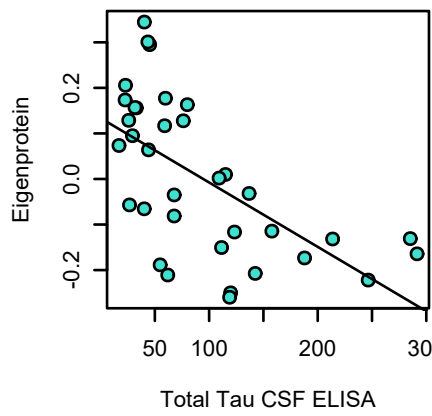

**bicor=0.47, p=0.0042**  
**cor=0.52, p=0.0014**

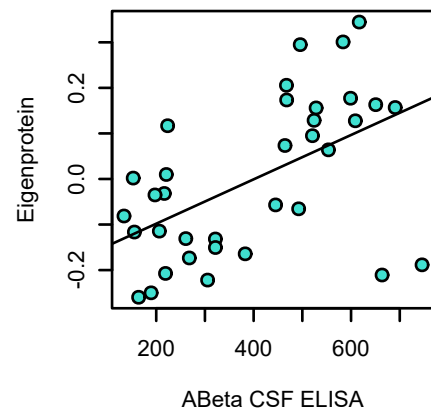

**bicor=0.64, p=3.5e-05**  
**cor=0.62, p=7.1e-05**

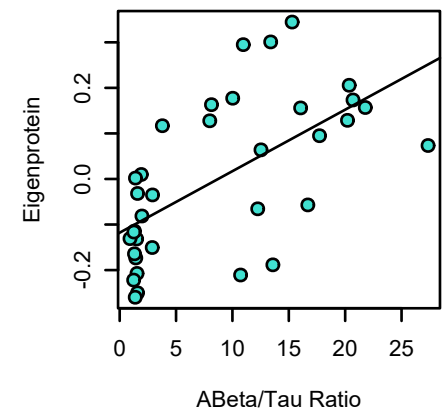

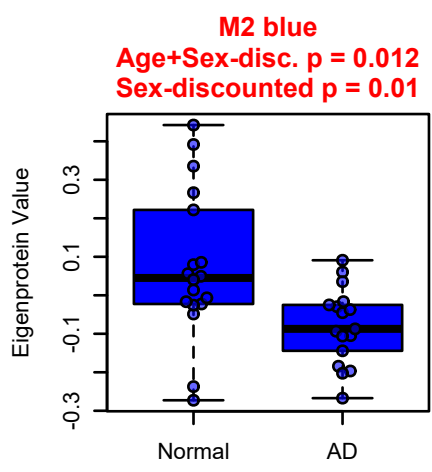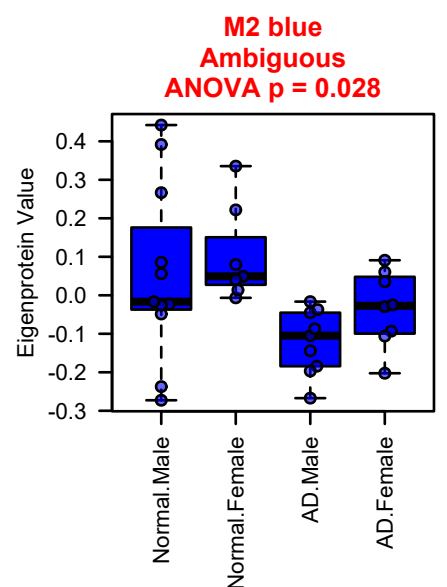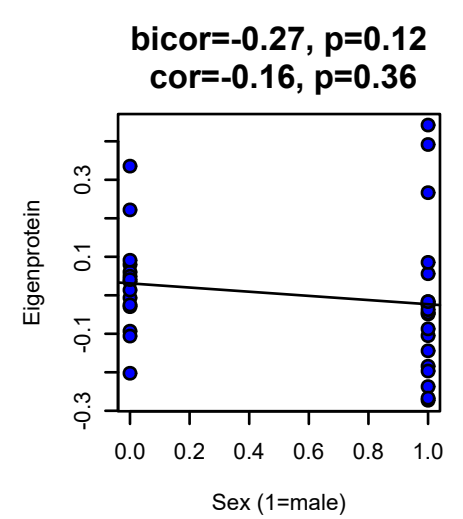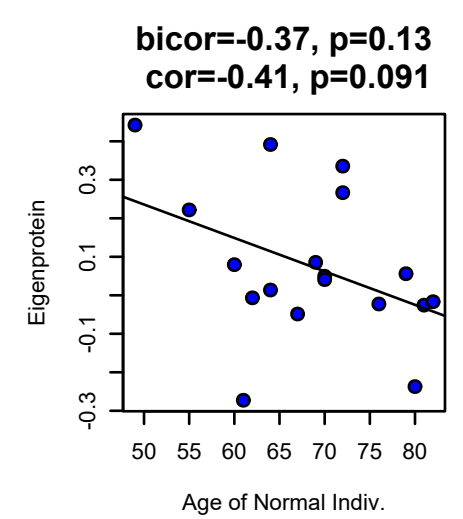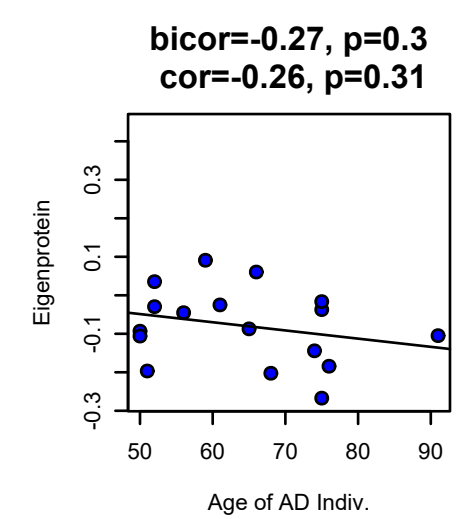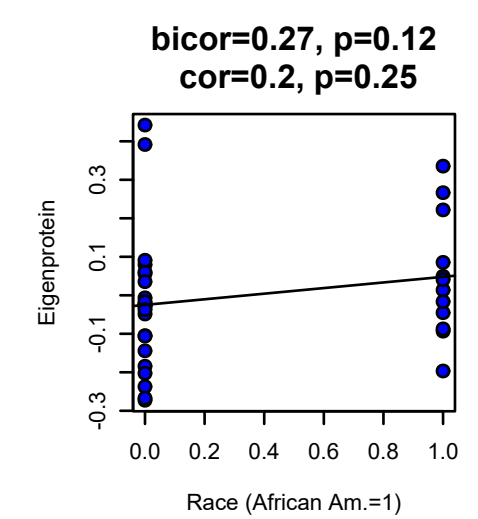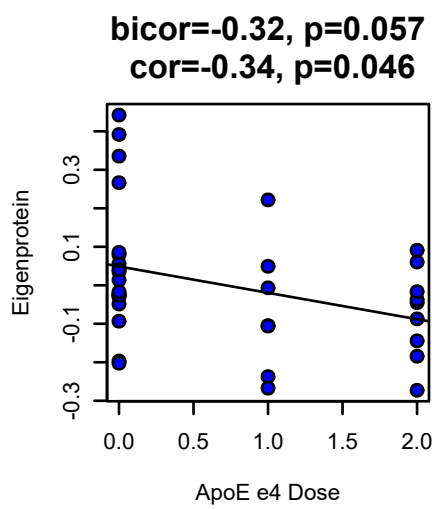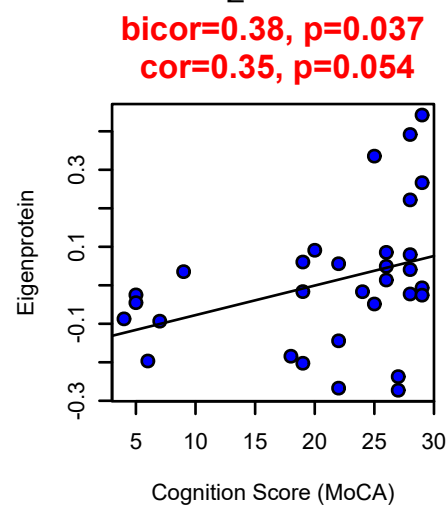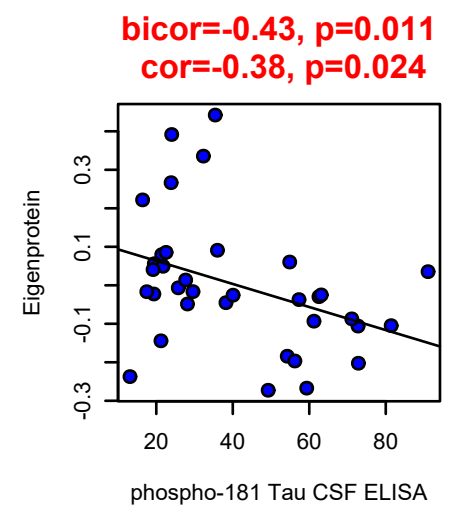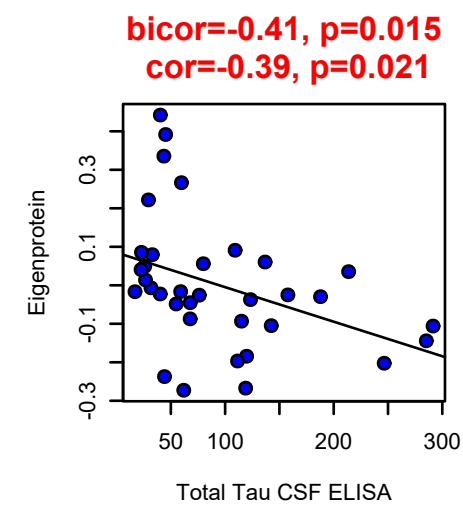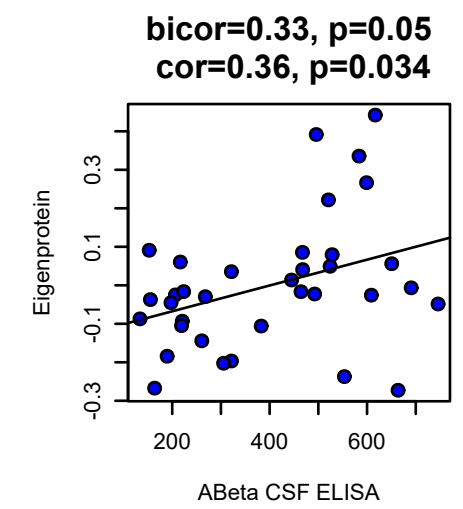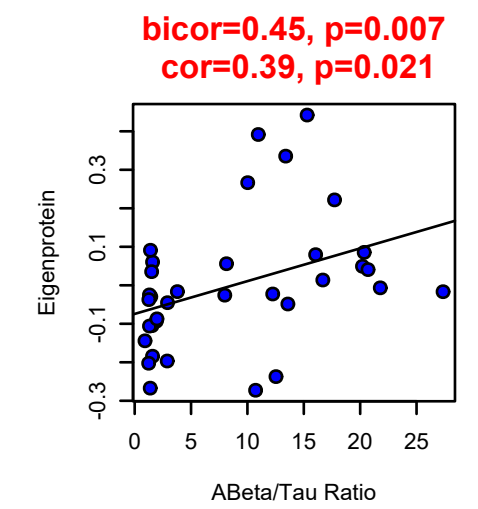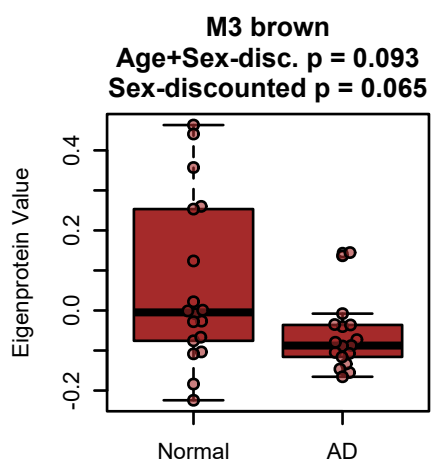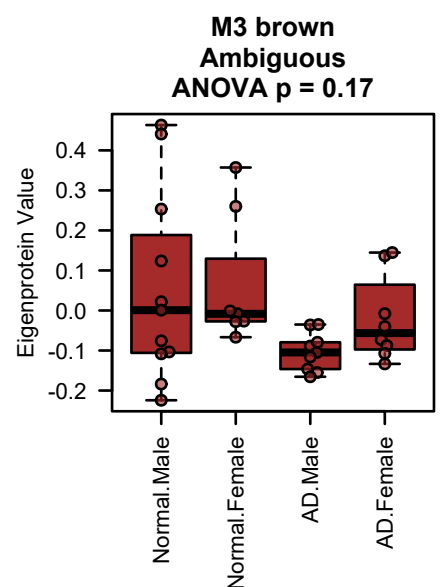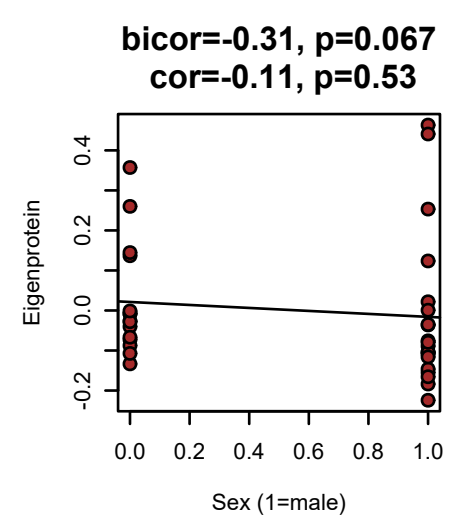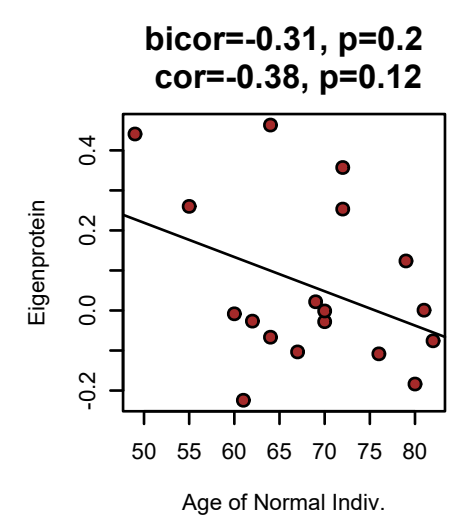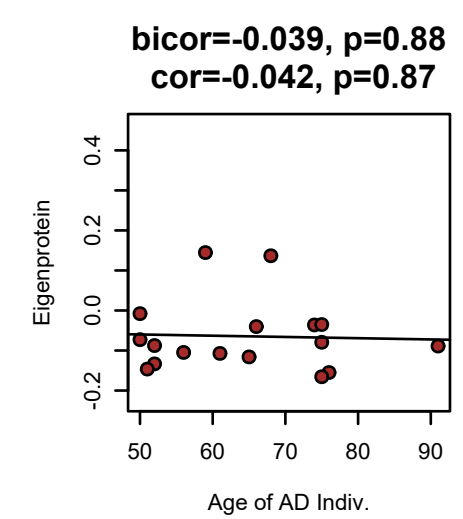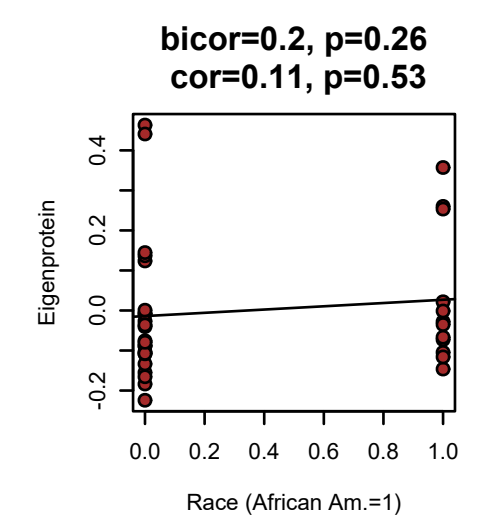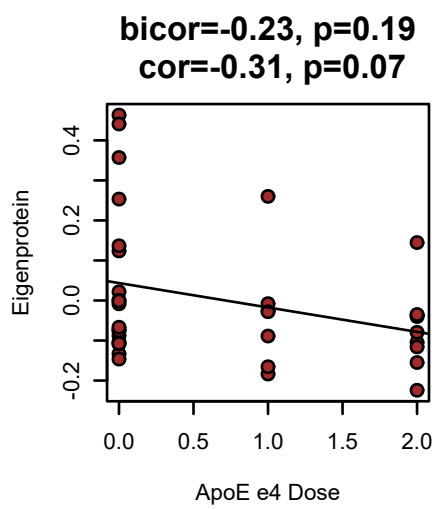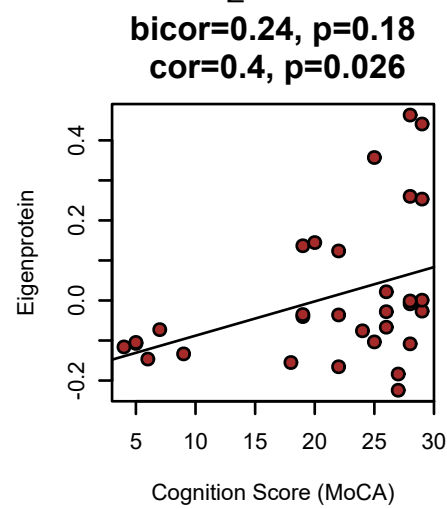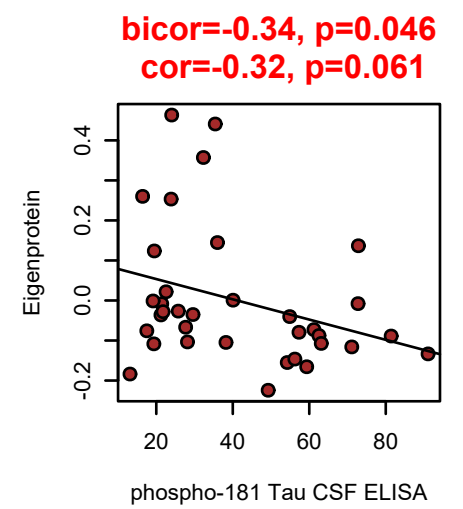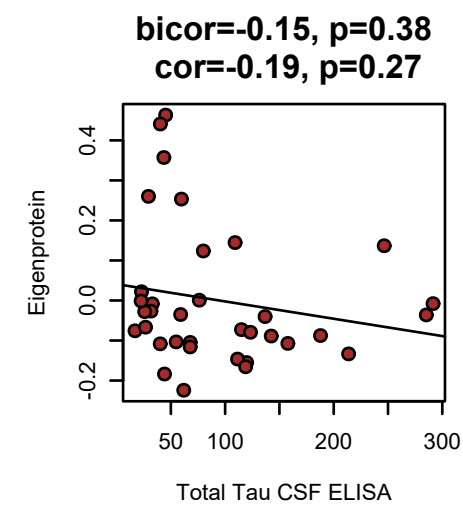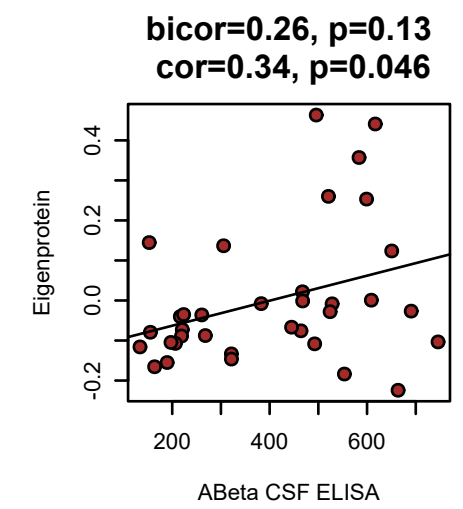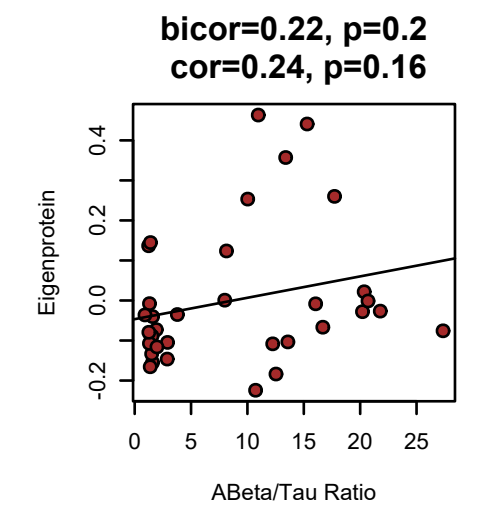

**M31 paleturquoise**  
Age+Sex-disc.  $p = 0.88$   
Sex-discounted  $p = 0.83$

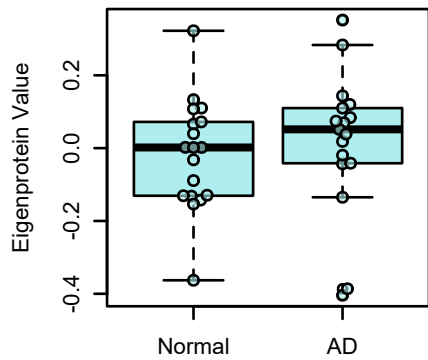

**M31 paleturquoise**  
Adhesion/ECM  
ANOVA  $p = 0.95$

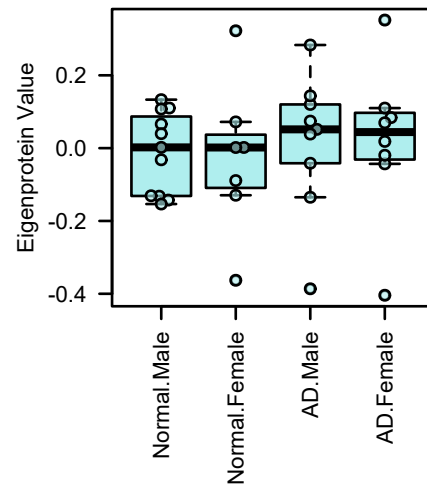

**bicor=-0.0063, p=0.97**  
**cor=0.0056, p=0.97**

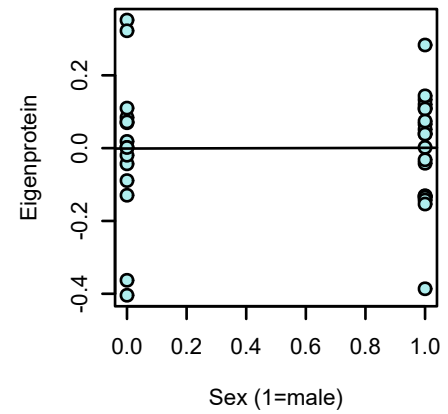

**bicor=-0.037, p=0.88**  
**cor=-0.056, p=0.83**

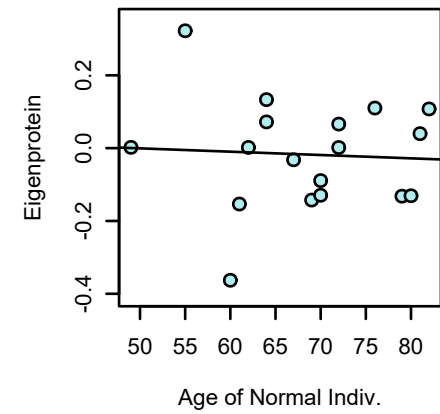

**bicor=0.26, p=0.31**  
**cor=0.18, p=0.49**

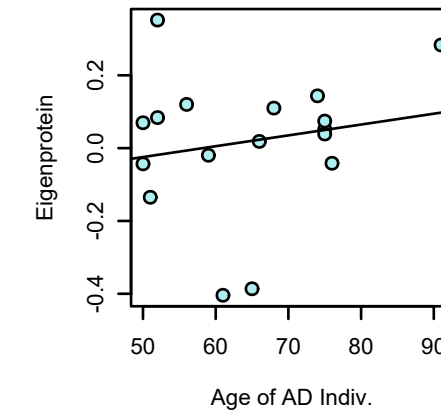

**bicor=-0.12, p=0.48**  
**cor=-0.096, p=0.58**

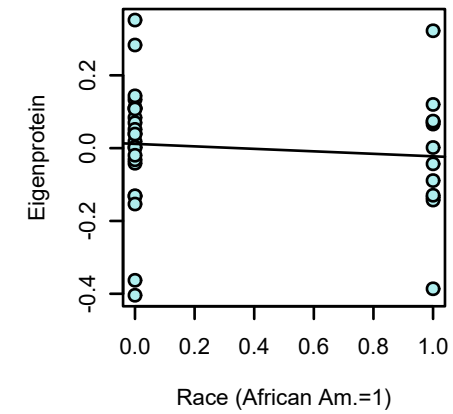

**bicor=0.027, p=0.88**  
**cor=0.019, p=0.91**

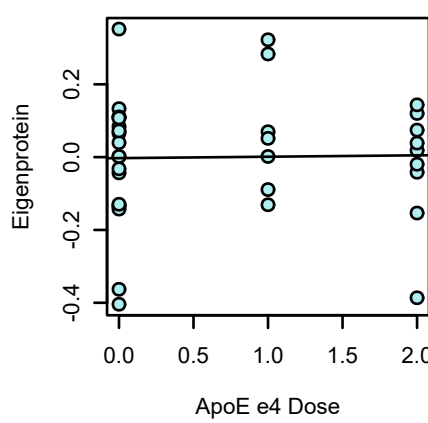

**bicor=-0.022, p=0.91**  
**cor=0.2, p=0.28**

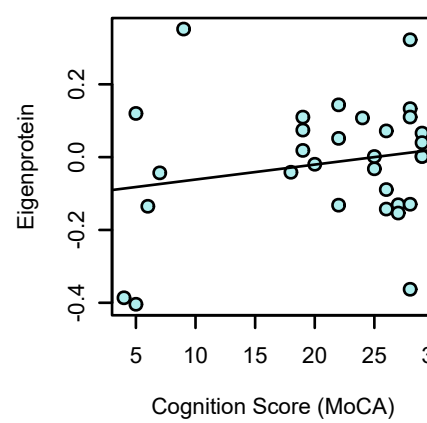

**bicor=0.088, p=0.62**  
**cor=0.1, p=0.57**

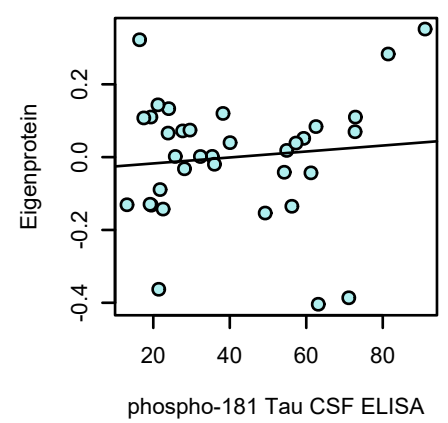

**bicor=0.22, p=0.19**  
**cor=0.26, p=0.13**

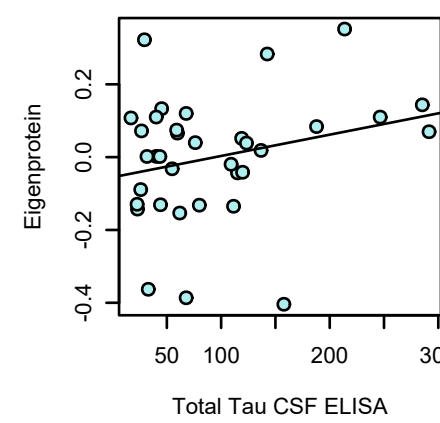

**bicor=-0.12, p=0.5**  
**cor=-0.053, p=0.76**

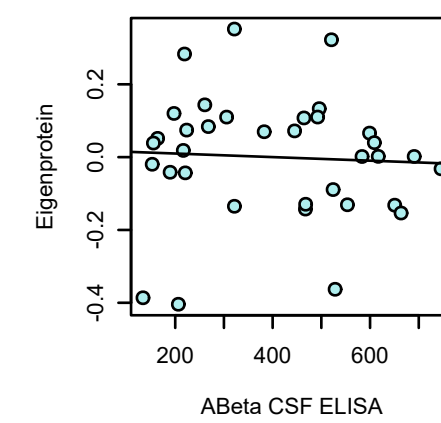

**bicor=-0.16, p=0.37**  
**cor=-0.085, p=0.63**

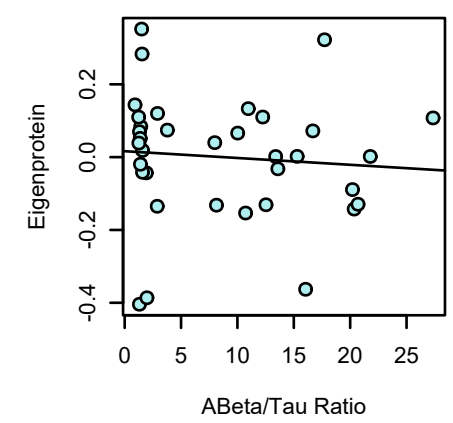

**M14 cyan**  
Age+Sex-disc.  $p = 0.76$   
Sex-discounted  $p = 0.56$

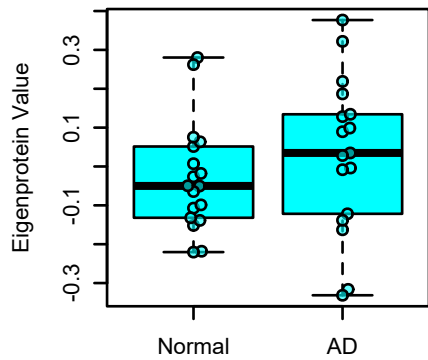

**M14 cyan**  
Innate Immune Response  
ANOVA  $p = 0.72$

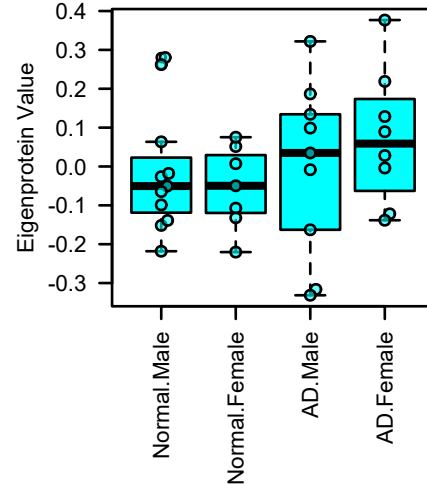

**bicor=-0.06, p=0.73**  
**cor=-0.069, p=0.69**

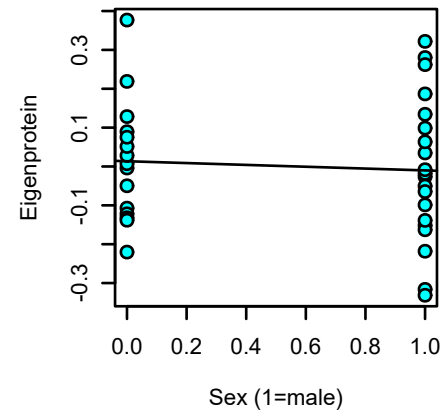

**bicor=-0.3, p=0.22**  
**cor=-0.37, p=0.13**

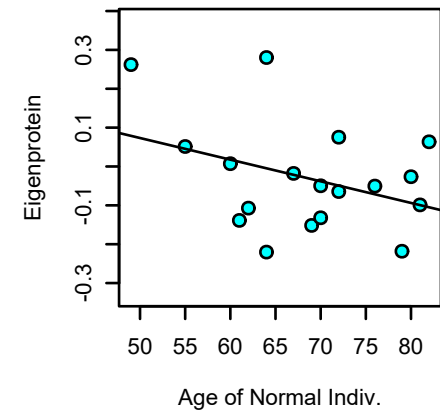

**bicor=0.12, p=0.66**  
**cor=0.12, p=0.65**

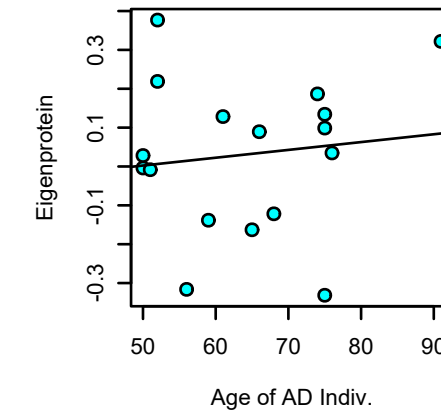

**bicor=-0.46, p=0.005**  
**cor=-0.47, p=0.0044**

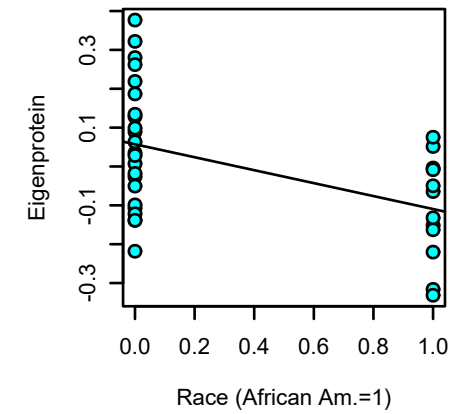

**bicor=-0.19, p=0.28**  
**cor=-0.21, p=0.23**

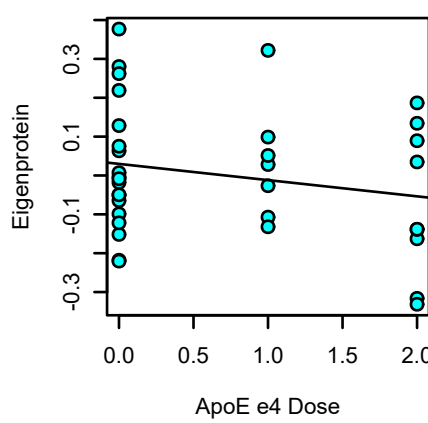

**bicor=0.0074, p=0.97**  
**cor=0.023, p=0.9**

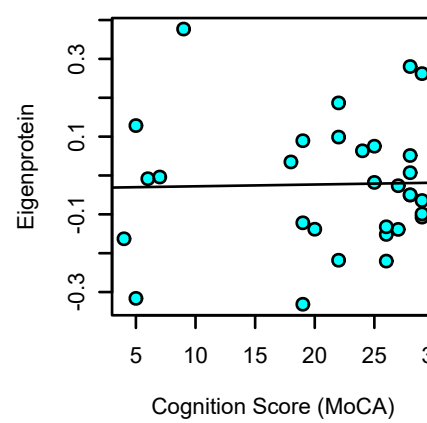

**bicor=0.33, p=0.056**  
**cor=0.37, p=0.029**

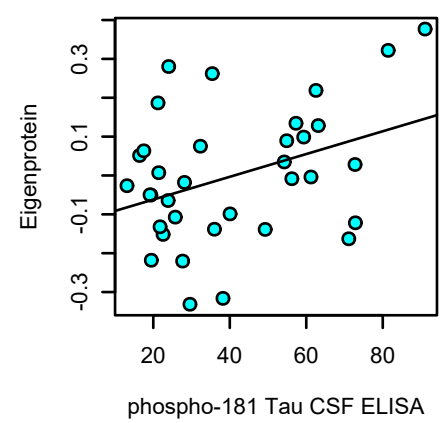

**bicor=0.41, p=0.014**  
**cor=0.38, p=0.024**

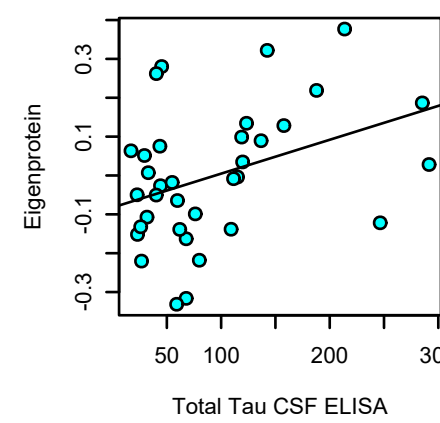

**bicor=-0.16, p=0.37**  
**cor=-0.13, p=0.46**

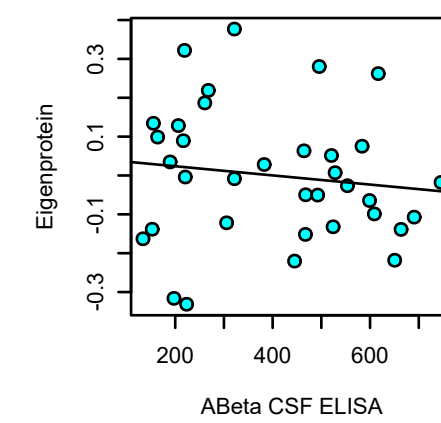

**bicor=-0.2, p=0.26**  
**cor=-0.18, p=0.3**

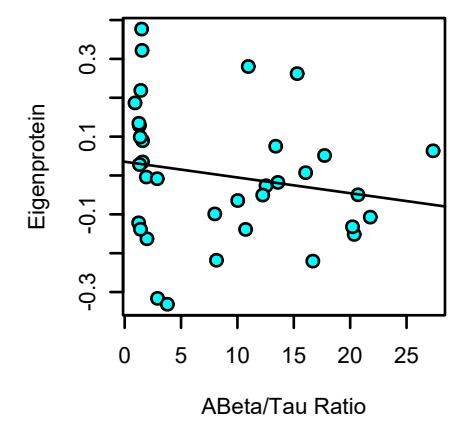

**M19 lightyellow**  
Age+Sex-disc.  $p = 0.9$   
Sex-discounted  $p = 0.77$

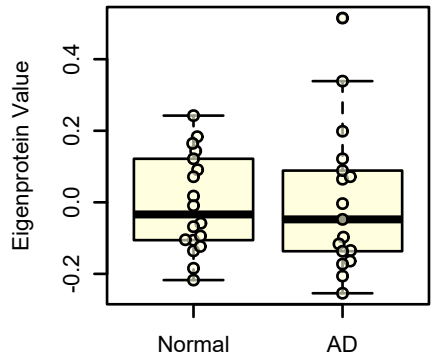

**M19 lightyellow**  
Leukocyte Activation  
ANOVA  $p = 0.73$

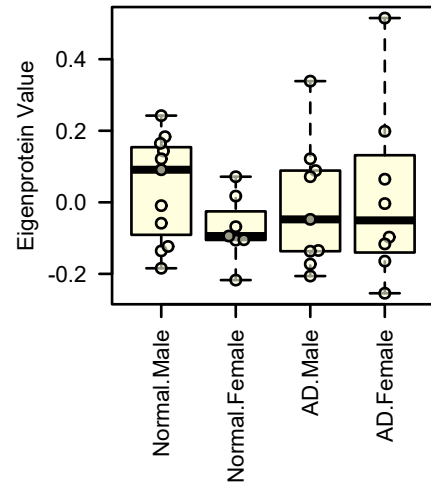

**bicor=0.17, p=0.32**  
**cor=0.12, p=0.49**

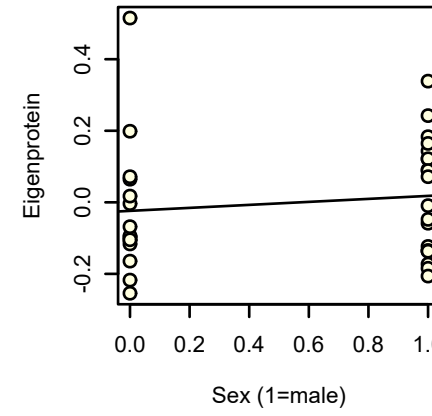

**bicor=-0.07, p=0.78**  
**cor=-0.069, p=0.79**

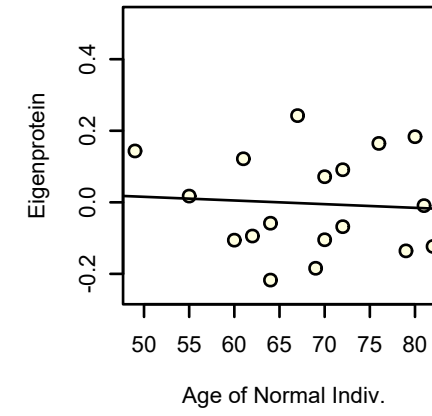

**bicor=0.24, p=0.35**  
**cor=0.19, p=0.47**

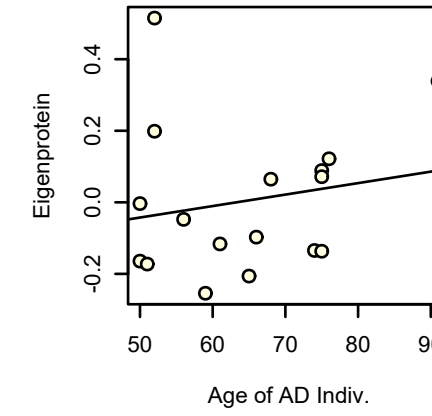

**bicor=-0.4, p=0.018**  
**cor=-0.4, p=0.017**

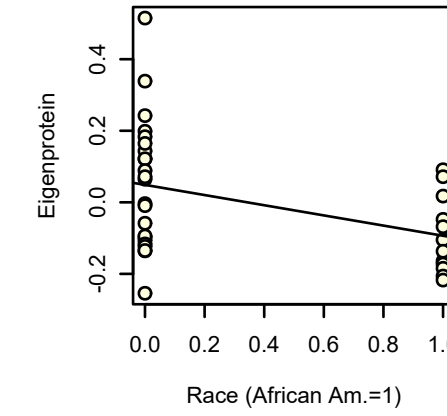

**bicor=-0.11, p=0.52**  
**cor=-0.14, p=0.42**

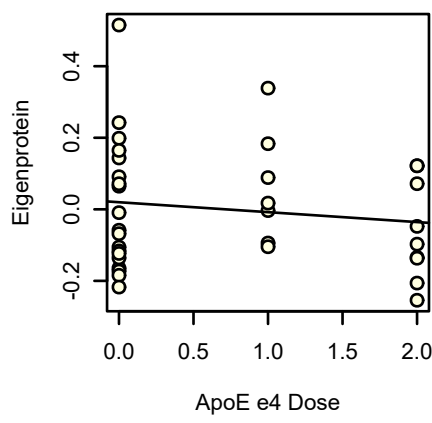

**bicor=0.18, p=0.32**  
**cor=0.15, p=0.42**

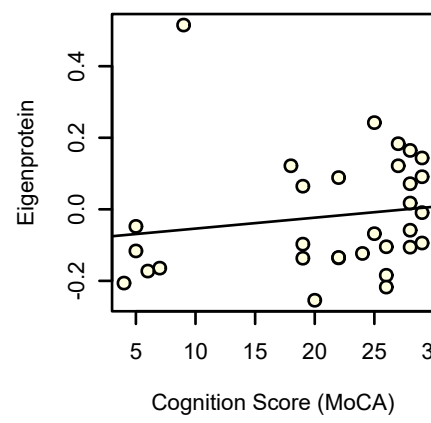

**bicor=0.28, p=0.11**  
**cor=0.35, p=0.039**

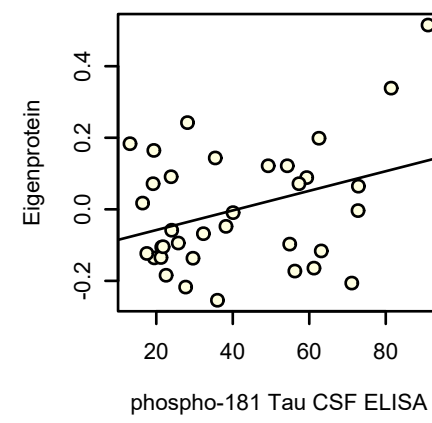

**bicor=0.27, p=0.12**  
**cor=0.21, p=0.23**

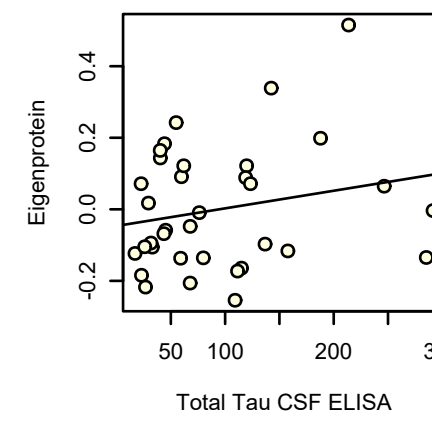

**bicor=0.1, p=0.57**  
**cor=0.12, p=0.49**

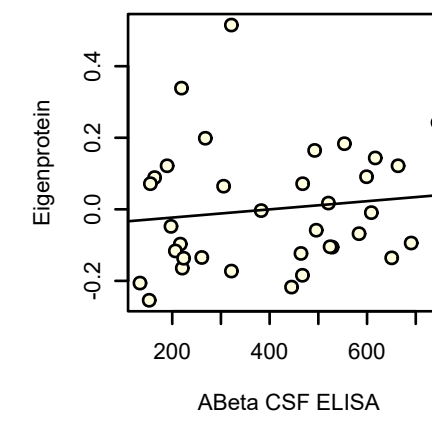

**bicor=-0.067, p=0.7**  
**cor=-0.13, p=0.46**

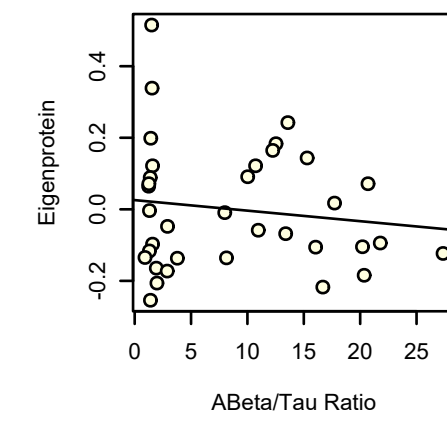

**M15 midnightblue**  
Age+Sex-disc.  $p = 0.13$   
Sex-discounted  $p = 0.072$

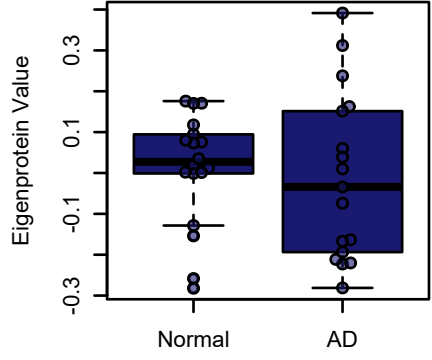

**M15 midnightblue**  
**Lipid Biosynthesis/Immune Respor**  
ANOVA  $p = 0.048$

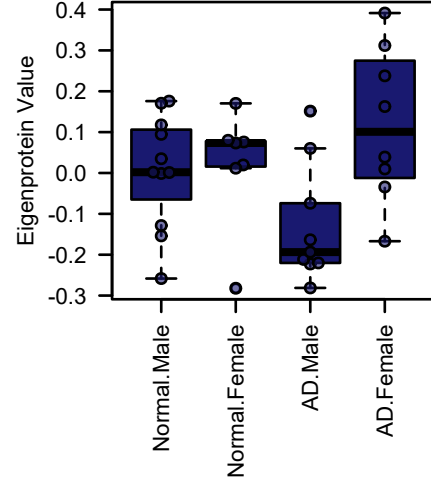

**bicor=-0.37, p=0.028**  
**cor=-0.38, p=0.024**

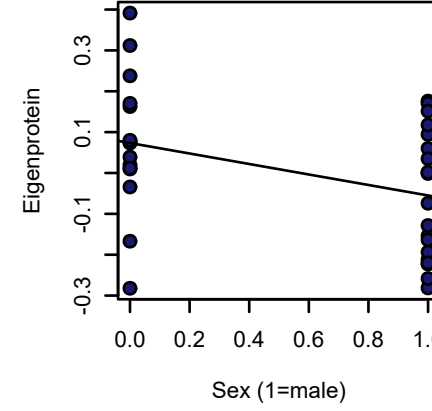

**bicor=-0.37, p=0.13**  
**cor=-0.33, p=0.18**

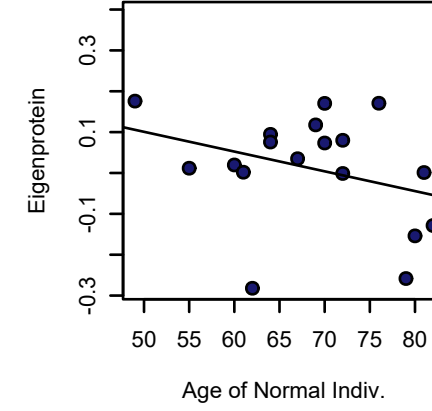

**bicor=-0.26, p=0.32**  
**cor=-0.26, p=0.31**

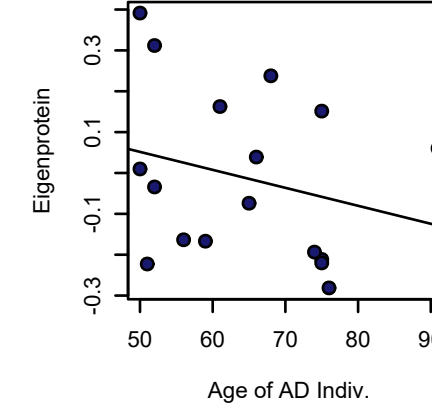

**bicor=0.076, p=0.67**  
**cor=0.085, p=0.63**

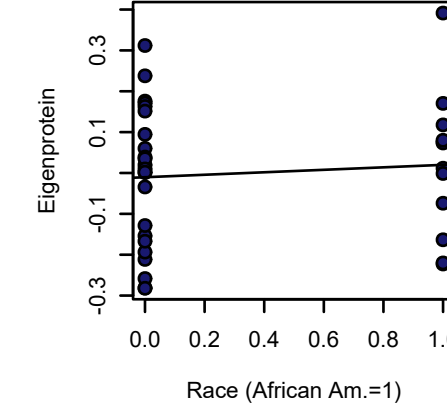

**bicor=-0.44, p=0.0076**  
**cor=-0.44, p=0.0082**

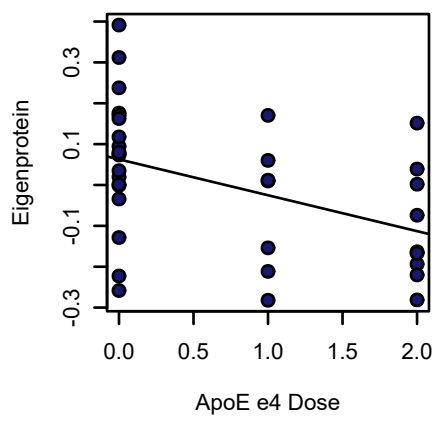

**bicor=0.13, p=0.48**  
**cor=-0.036, p=0.85**

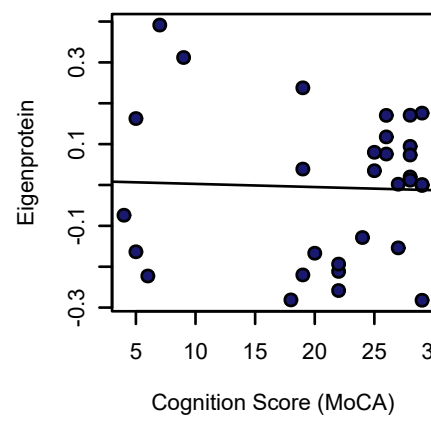

**bicor=0.22, p=0.21**  
**cor=0.28, p=0.1**

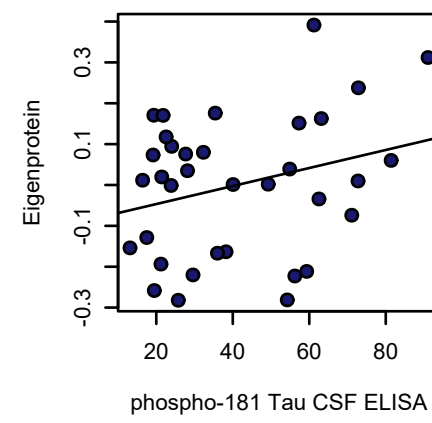

**bicor=0.058, p=0.74**  
**cor=0.082, p=0.64**

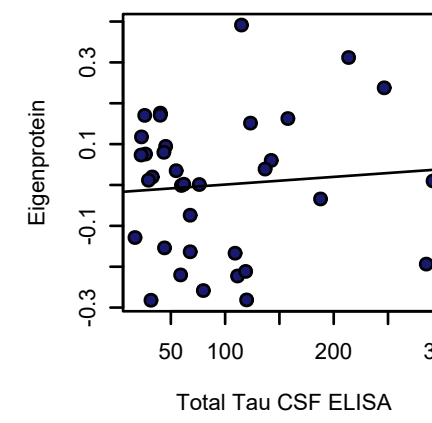

**bicor=0.065, p=0.71**  
**cor=0.037, p=0.83**

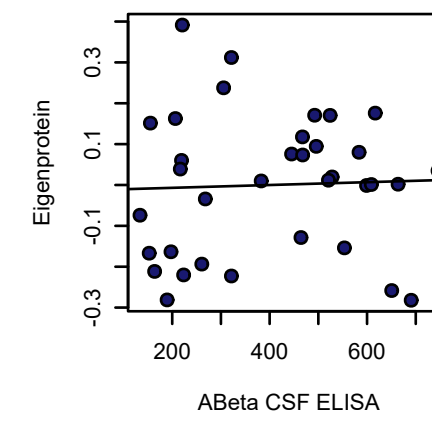

**bicor=0.061, p=0.73**  
**cor=0.035, p=0.84**

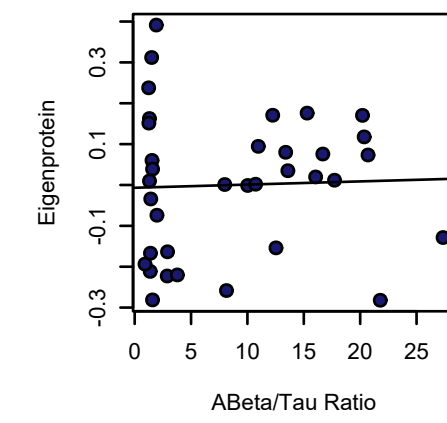



**M29 saddlebrown**  
Age+Sex-disc.  $p = 4.4e-05$   
Sex-discounted  $p = 0.00034$

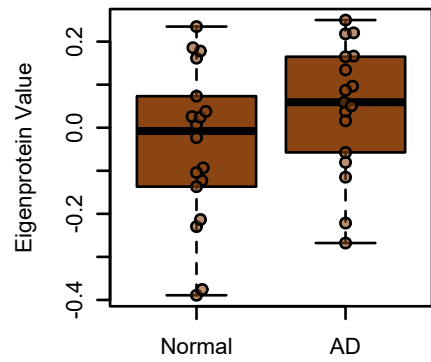

**M29 saddlebrown**  
IGF-Growth/GAG Binding  
ANOVA  $p = 0.00011$

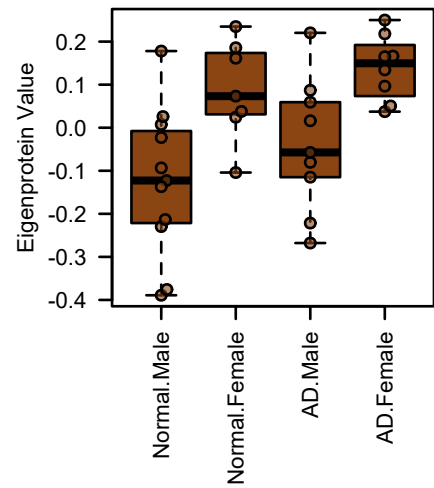

**bicor=-0.6, p=0.00015**  
**cor=-0.59, p=0.00019**

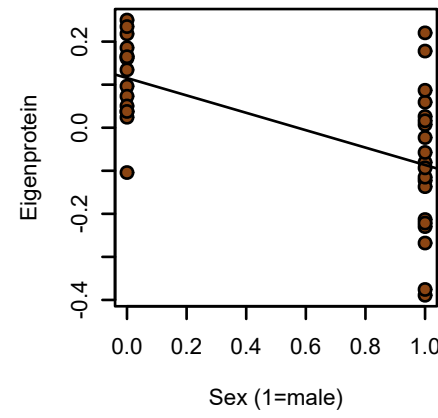

**bicor=-0.73, p=0.00056**  
**cor=-0.75, p=0.00034**

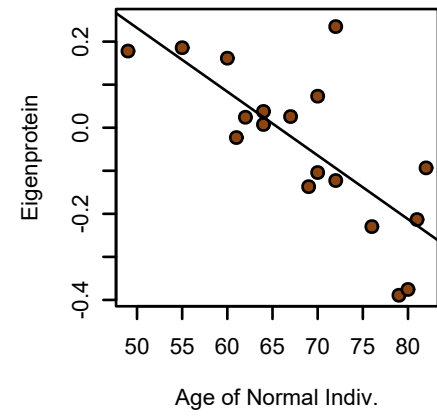

**bicor=-0.43, p=0.086**  
**cor=-0.48, p=0.051**

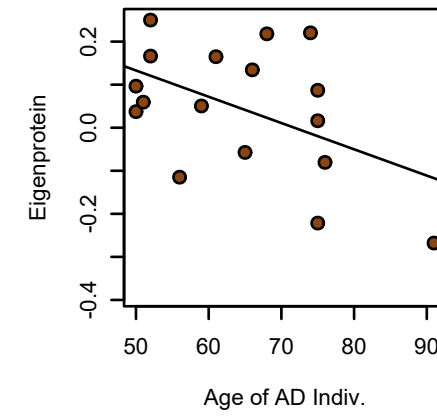

**bicor=-0.072, p=0.68**  
**cor=-0.046, p=0.79**

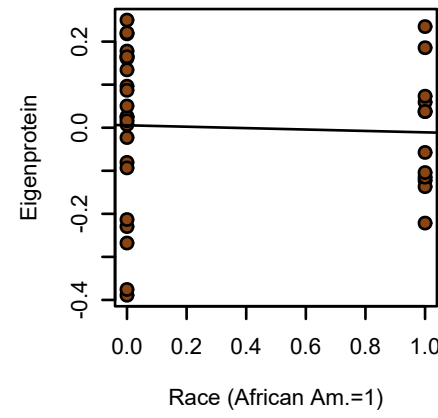

**bicor=-0.076, p=0.66**  
**cor=-0.065, p=0.71**

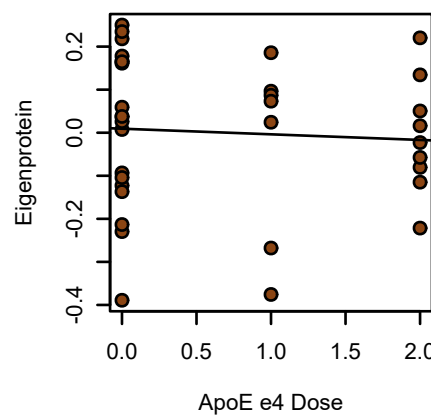

**bicor=-0.16, p=0.4**  
**cor=-0.16, p=0.39**

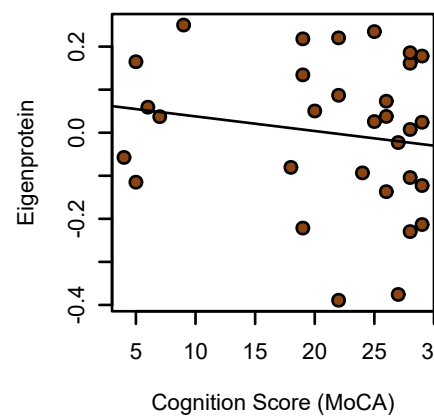

**bicor=0.26, p=0.12**  
**cor=0.31, p=0.07**

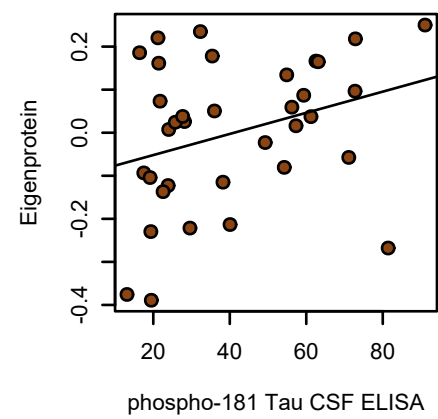

**bicor=0.31, p=0.068**  
**cor=0.4, p=0.017**

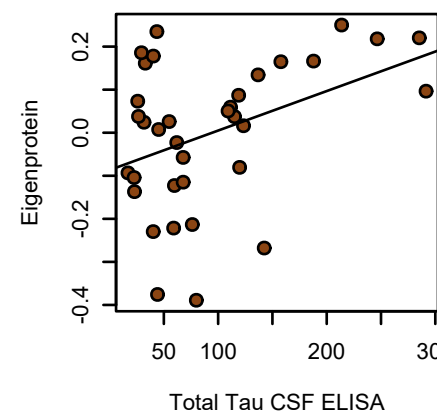

**bicor=-0.12, p=0.49**  
**cor=-0.16, p=0.36**

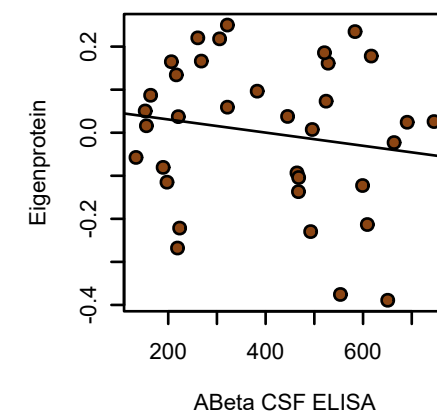

**bicor=-0.15, p=0.38**  
**cor=-0.14, p=0.42**

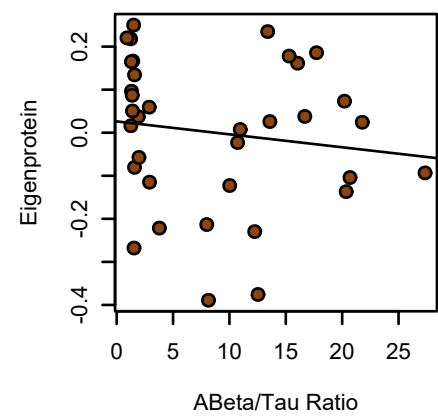

**M28 skyblue**  
Age+Sex-disc.  $p = 0.0062$   
Sex-discounted  $p = 0.0064$

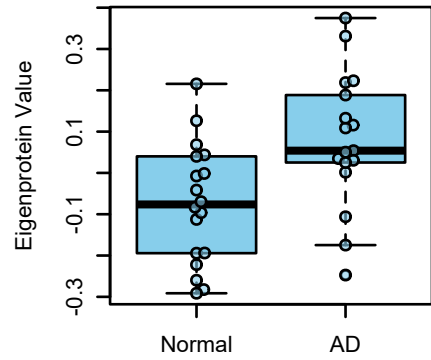

**M28 skyblue**  
Complement/Humoral Immune Respr  
ANOVA  $p = 0.013$

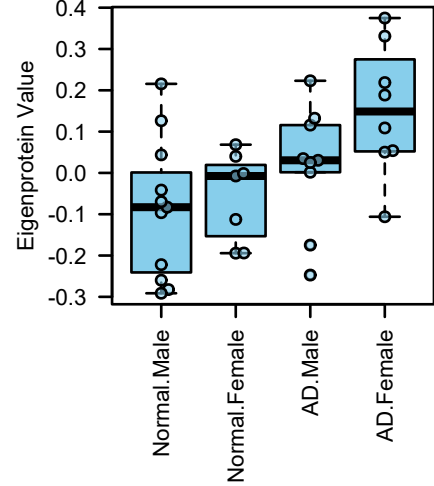

**bicor=-0.26, p=0.14**  
**cor=-0.28, p=0.1**

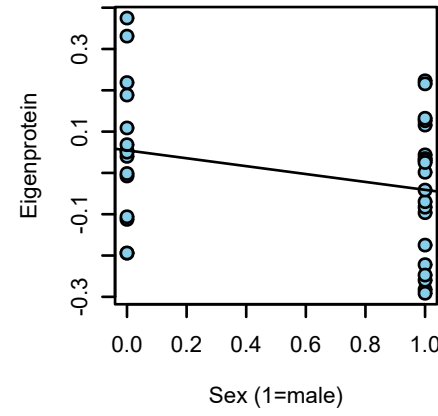

**bicor=-0.18, p=0.49**  
**cor=-0.18, p=0.47**

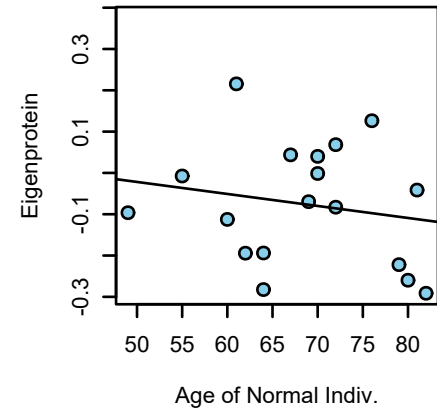

**bicor=-0.53, p=0.027**  
**cor=-0.49, p=0.046**

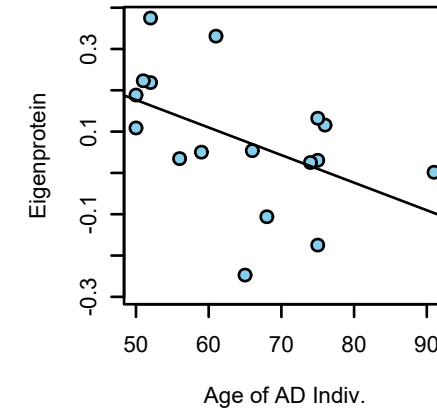

**bicor=-0.083, p=0.63**  
**cor=-0.079, p=0.65**

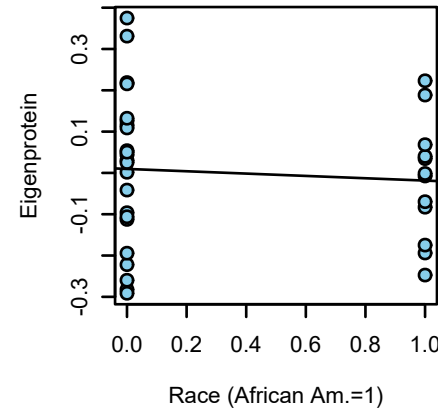

**bicor=0.044, p=0.8**  
**cor=0.026, p=0.88**

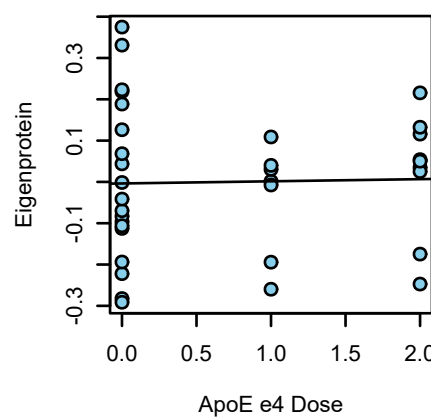

**bicor=-0.34, p=0.059**  
**cor=-0.44, p=0.013**

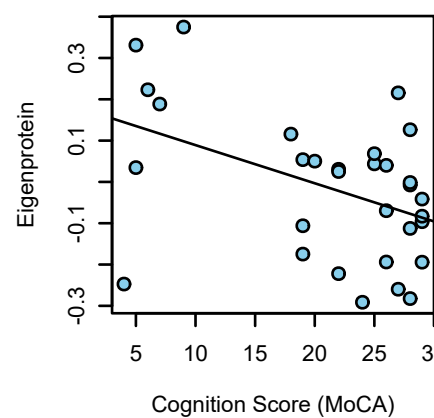

**bicor=0.49, p=0.0028**  
**cor=0.55, p=0.00062**

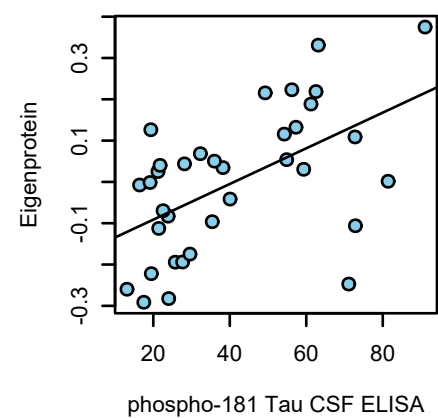

**bicor=0.49, p=0.0027**  
**cor=0.47, p=0.0044**

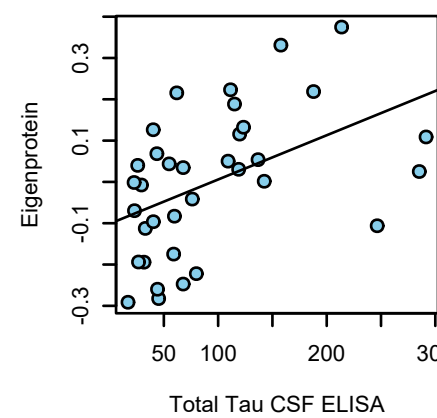

**bicor=-0.28, p=0.1**  
**cor=-0.31, p=0.07**

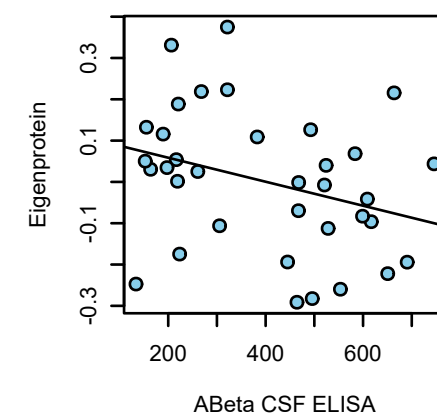

**bicor=-0.47, p=0.004**  
**cor=-0.47, p=0.0044**

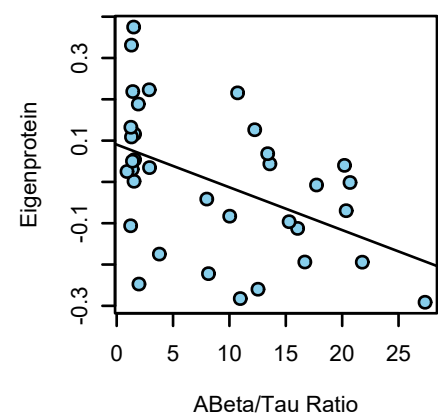

**M21 darkred**  
Age+Sex-disc.  $p = 0.62$   
Sex-discounted  $p = 0.88$

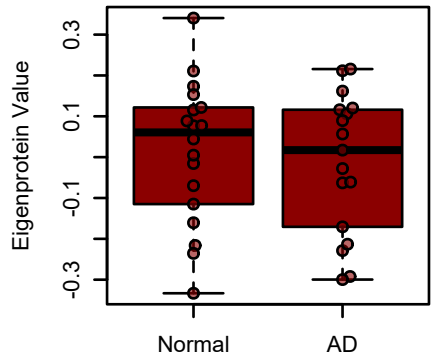

**M21 darkred**  
Metal Ion Homeostasis  
ANOVA  $p = 0.69$

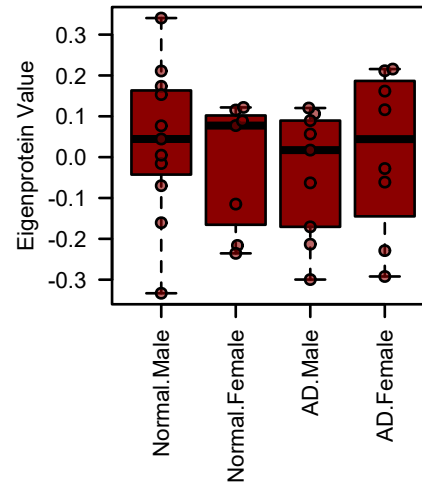

bicor=0.019,  $p=0.92$   
cor=0.023,  $p=0.9$

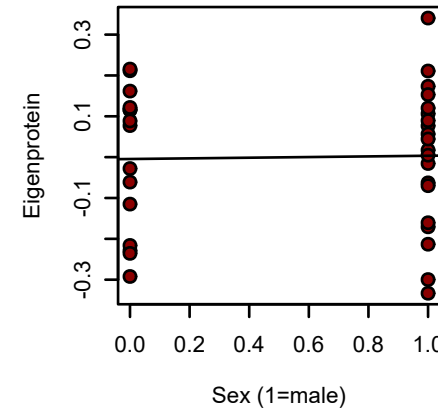

bicor=-0.13,  $p=0.61$   
cor=-0.2,  $p=0.43$

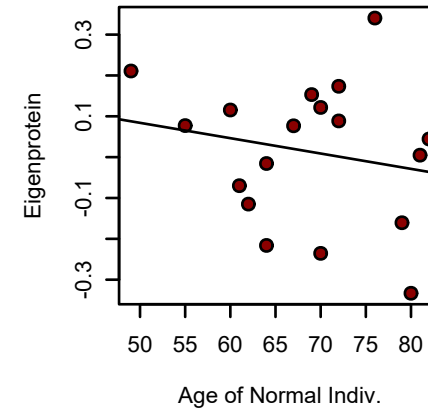

bicor=-0.18,  $p=0.49$   
cor=-0.17,  $p=0.51$

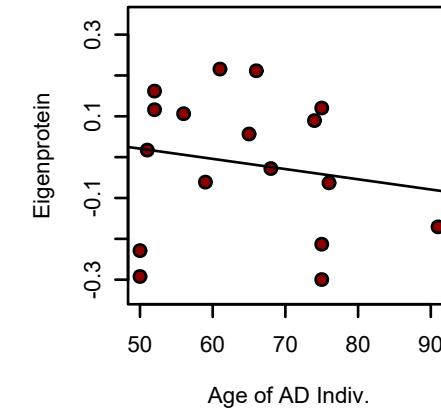

bicor=-0.061,  $p=0.73$   
cor=-0.089,  $p=0.61$

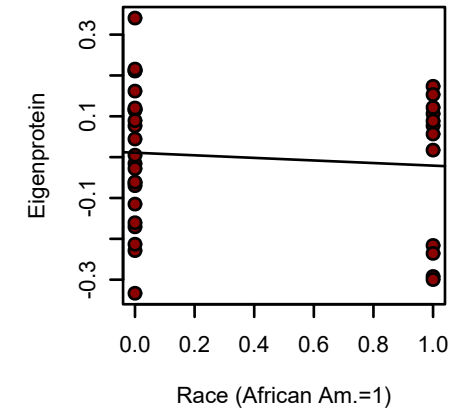

bicor=-0.13,  $p=0.45$   
cor=-0.14,  $p=0.42$

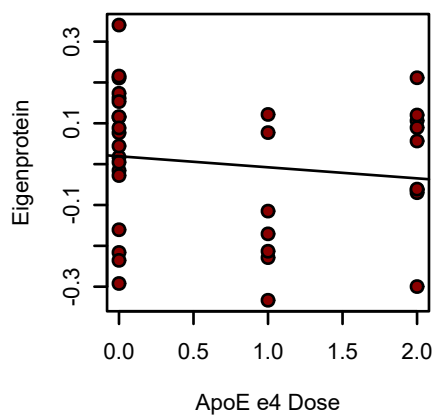

bicor=0.16,  $p=0.39$   
cor=-0.029,  $p=0.88$

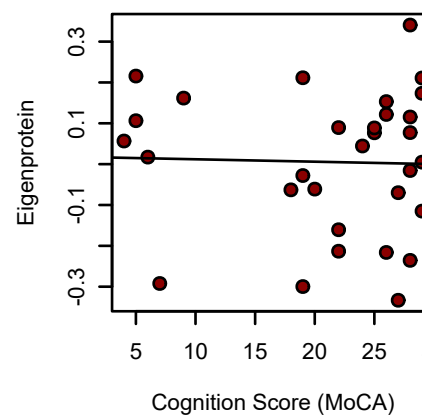

bicor=-0.093,  $p=0.6$   
cor=-0.026,  $p=0.88$

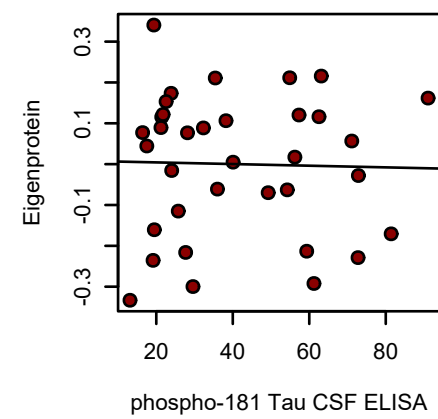

bicor=-0.066,  $p=0.71$   
cor=-0.02,  $p=0.91$

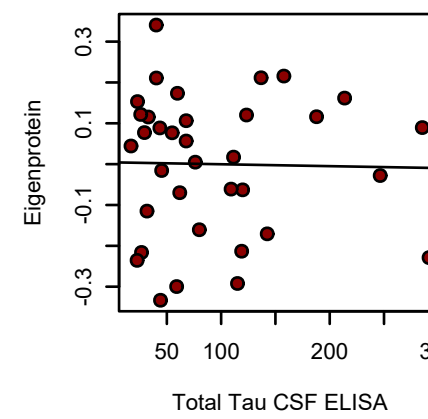

bicor=0.11,  $p=0.54$   
cor=0.065,  $p=0.71$

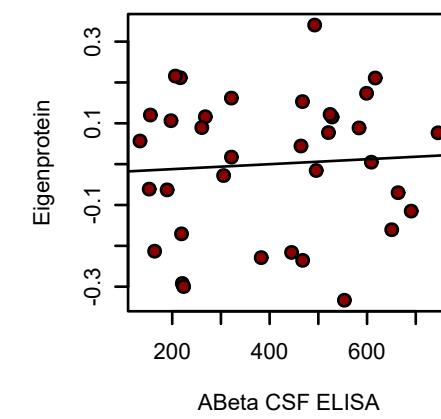

bicor=0.051,  $p=0.77$   
cor=0.065,  $p=0.71$

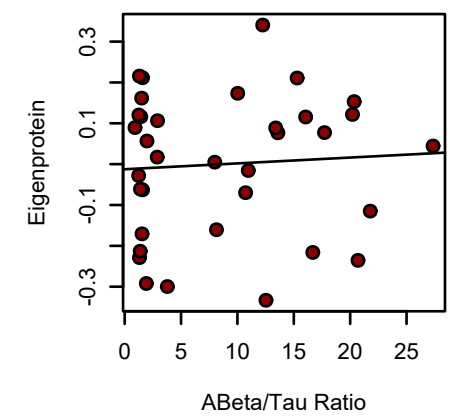

**M32 violet**  
Age+Sex-disc.  $p = 0.27$   
Sex-discounted  $p = 0.16$

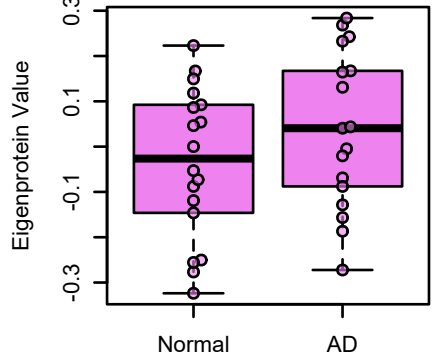

**M32 violet**  
Lipoprotein Metabolism  
ANOVA  $p = 0.42$

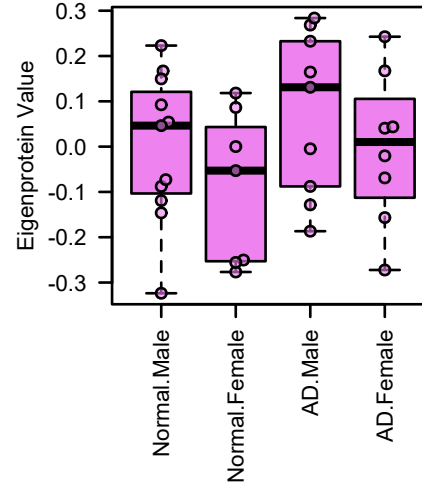

bicor=0.22,  $p=0.21$   
cor=0.22,  $p=0.2$

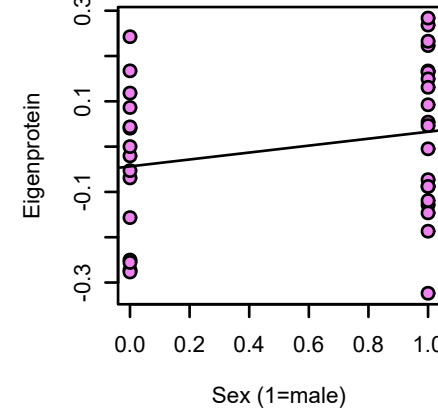

bicor=-0.16,  $p=0.53$   
cor=-0.17,  $p=0.5$

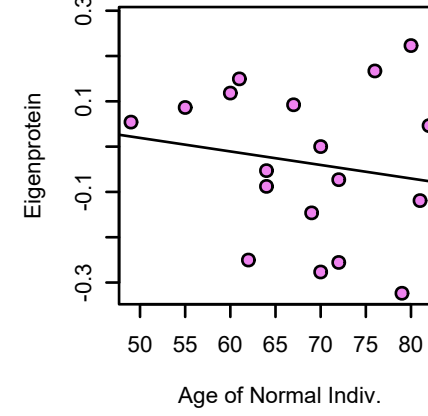

bicor=0.17,  $p=0.51$   
cor=0.17,  $p=0.51$

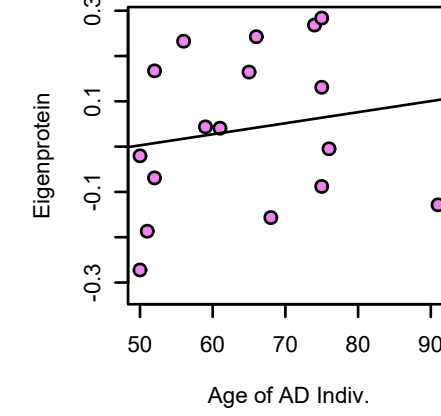

bicor=-0.31,  $p=0.068$   
cor=-0.31,  $p=0.07$

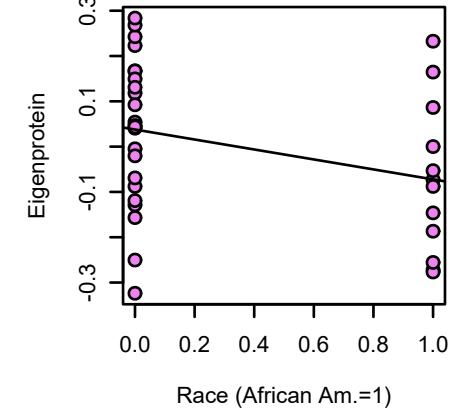

bicor=0.52,  $p=0.0014$   
cor=0.52,  $p=0.0014$

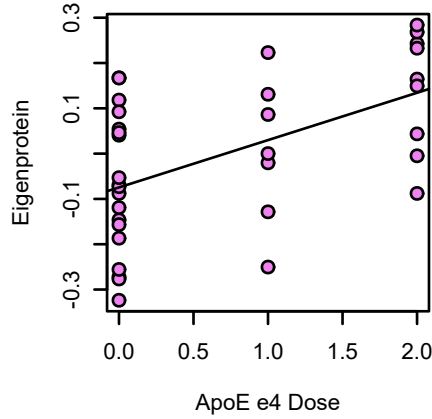

bicor=-0.038,  $p=0.84$   
cor=-0.11,  $p=0.56$

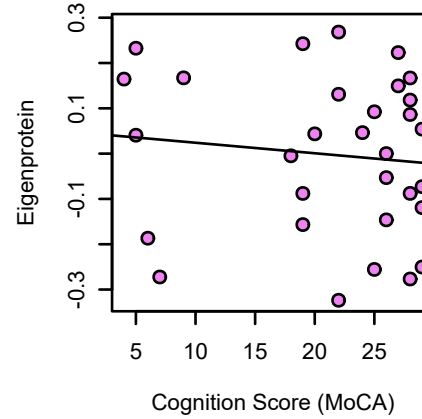

bicor=0.057,  $p=0.74$   
cor=0.067,  $p=0.7$

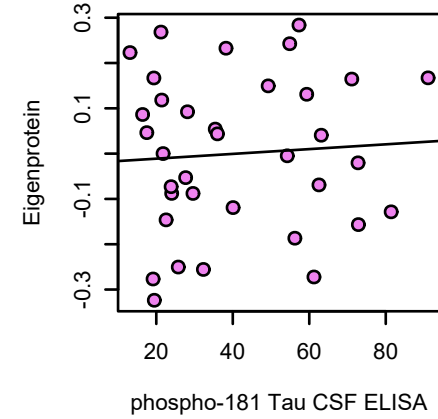

bicor=0.13,  $p=0.47$   
cor=0.15,  $p=0.39$

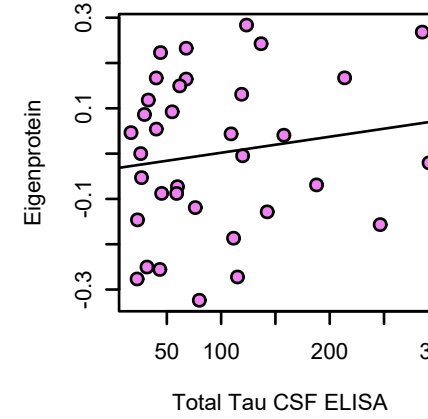

bicor=-0.25,  $p=0.14$   
cor=-0.27,  $p=0.12$

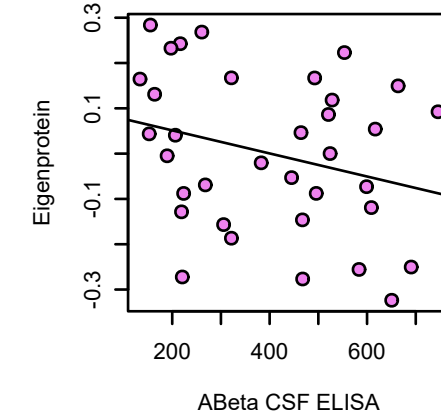

bicor=-0.21,  $p=0.23$   
cor=-0.22,  $p=0.2$

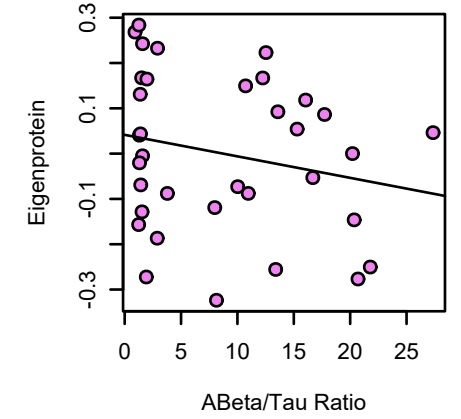

**M11 greenyellow**  
Age+Sex-disc.  $p = 0.56$   
Sex-discounted  $p = 0.37$

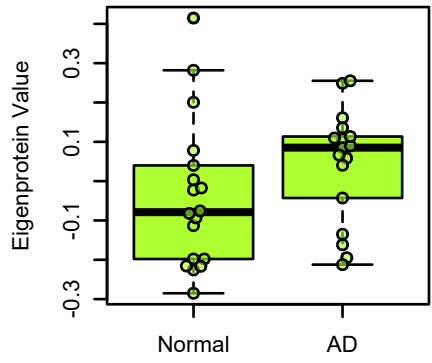

**M11 greenyellow**  
Immunoglobulins/Coagulation Casc  
ANOVA  $p = 0.51$

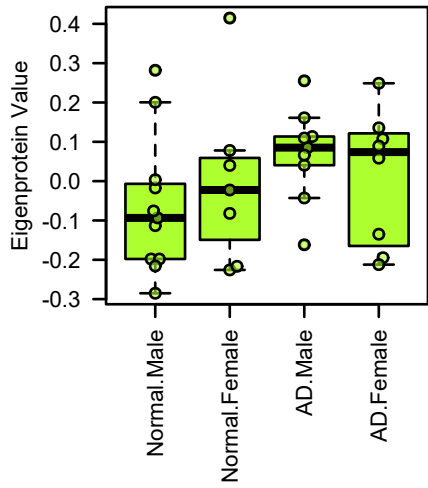

**bicor=-0.014, p=0.93**  
**cor=-0.029, p=0.87**

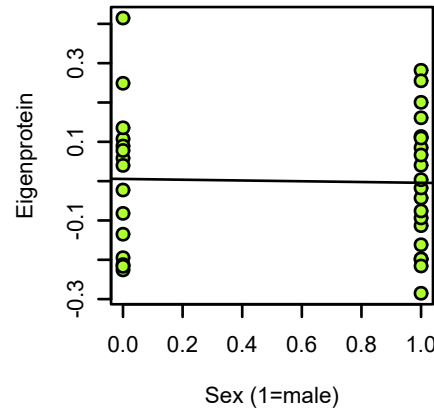

**bicor=0.052, p=0.84**  
**cor=-0.0031, p=0.99**

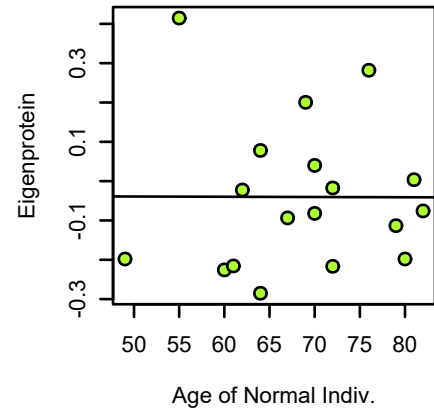

**bicor=-0.13, p=0.61**  
**cor=-0.13, p=0.62**

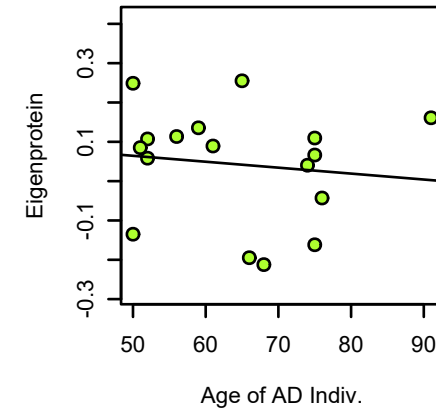

**bicor=0.42, p=0.013**  
**cor=0.42, p=0.012**

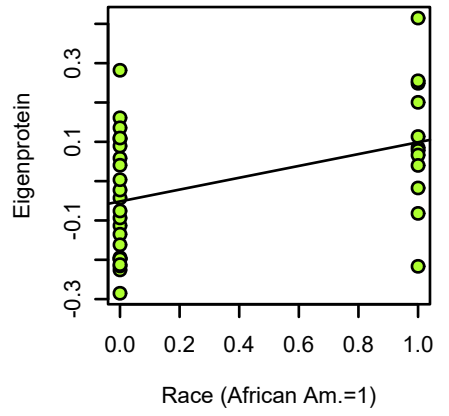

**bicor=0.1, p=0.56**  
**cor=0.1, p=0.57**

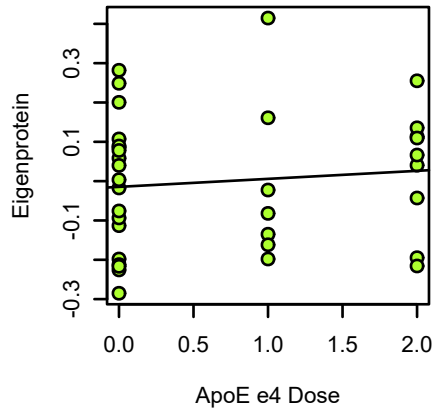

**bicor=-0.17, p=0.36**  
**cor=-0.36, p=0.047**

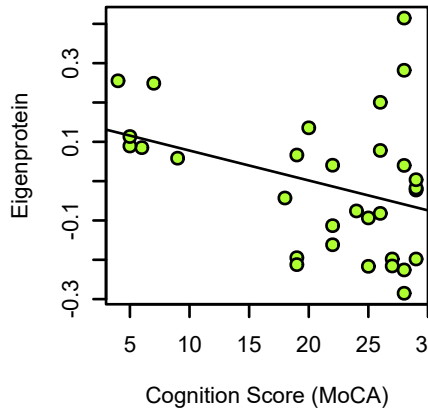

**bicor=0.096, p=0.58**  
**cor=0.09, p=0.61**

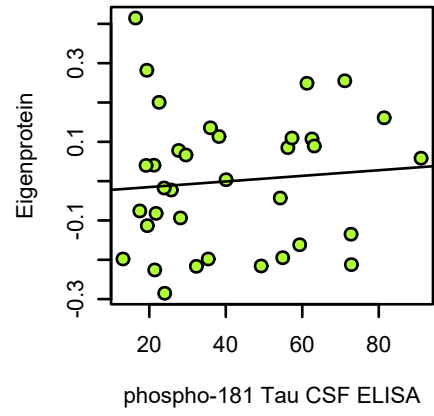

**bicor=0.039, p=0.82**  
**cor=-0.032, p=0.86**

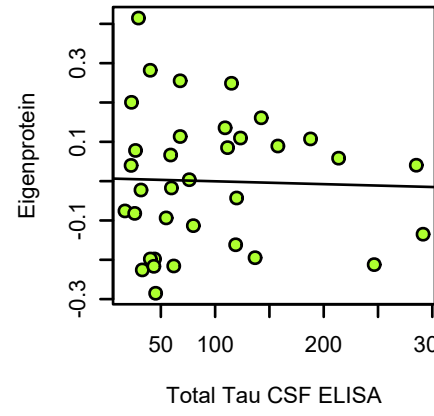

**bicor=-0.38, p=0.024**  
**cor=-0.37, p=0.029**

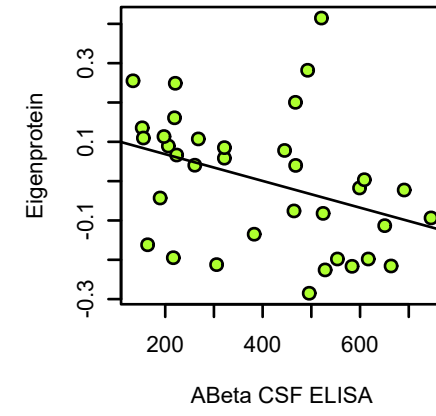

**bicor=-0.15, p=0.38**  
**cor=-0.12, p=0.49**

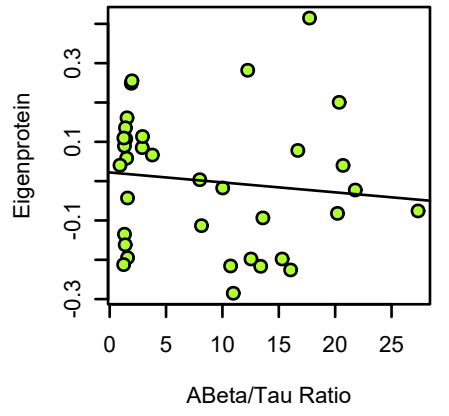

**M27 white**  
Age+Sex-disc.  $p = 0.0019$   
Sex-discounted  $p = 0.00075$

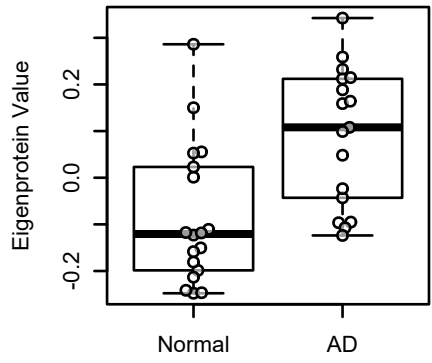

**M27 white**  
Collagen/ECM  
ANOVA  $p = 0.0011$

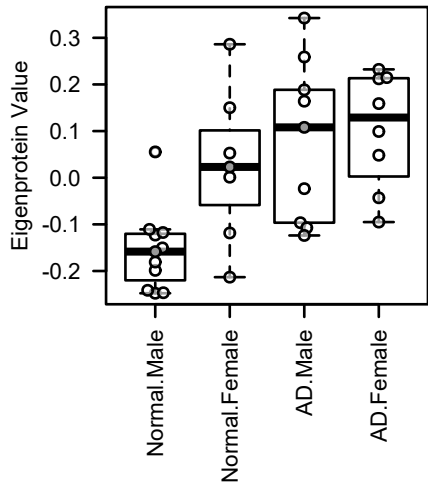

**bicor=-0.36, p=0.035**  
**cor=-0.34, p=0.046**

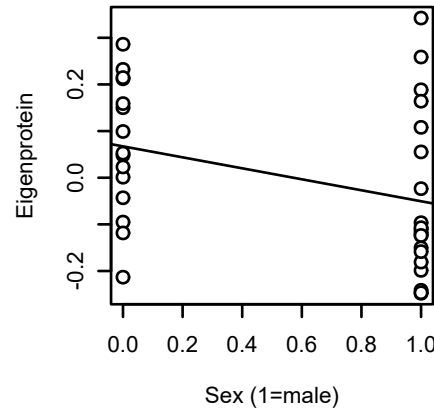

**bicor=-0.39, p=0.11**  
**cor=-0.39, p=0.11**

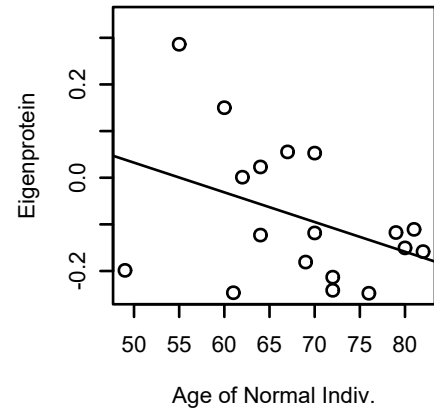

**bicor=-0.23, p=0.37**  
**cor=-0.23, p=0.37**

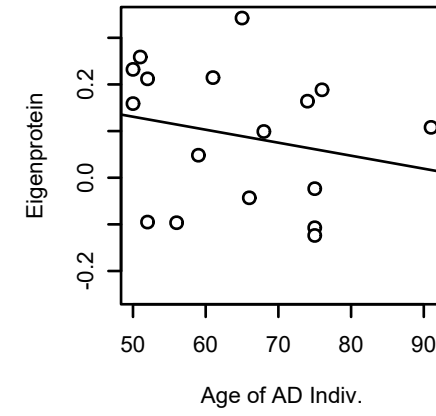

**bicor=0.057, p=0.75**  
**cor=0.079, p=0.65**

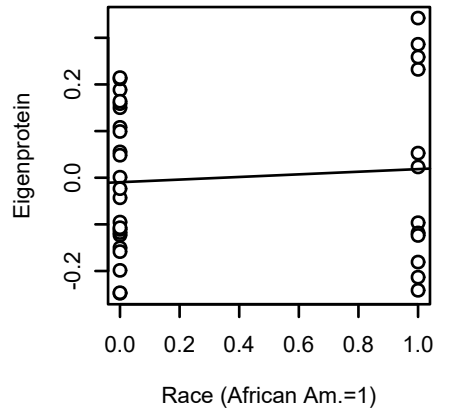

**bicor=0.094, p=0.59**  
**cor=0.1, p=0.57**

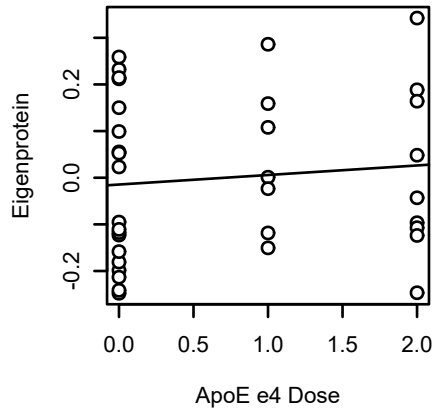

**bicor=-0.42, p=0.018**  
**cor=-0.52, p=0.0027**

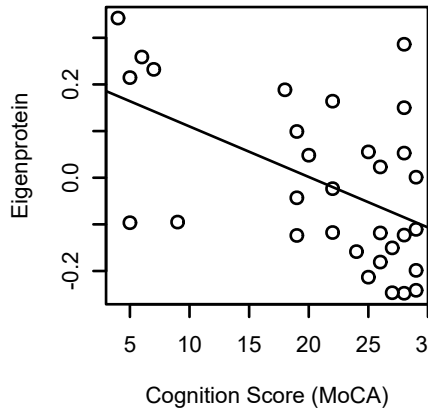

**bicor=0.43, p=0.0098**  
**cor=0.4, p=0.017**

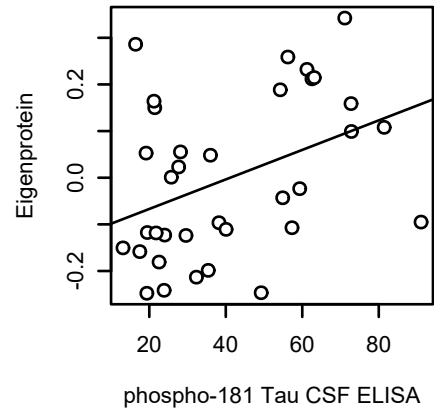

**bicor=0.45, p=0.0061**  
**cor=0.41, p=0.014**

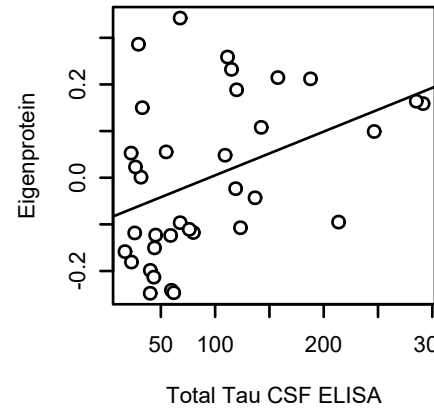

**bicor=-0.48, p=0.0033**  
**cor=-0.47, p=0.0044**

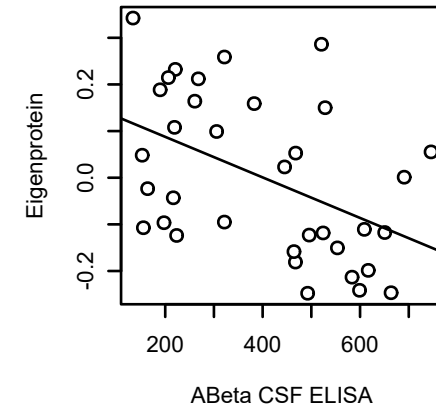

**bicor=-0.38, p=0.025**  
**cor=-0.38, p=0.024**

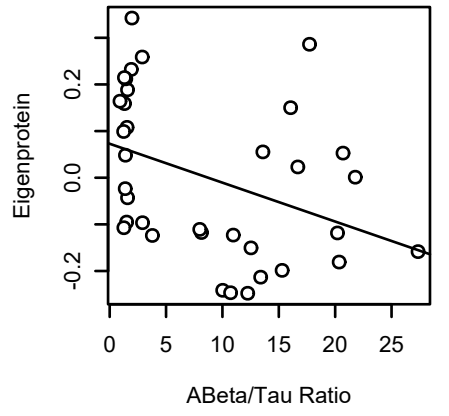

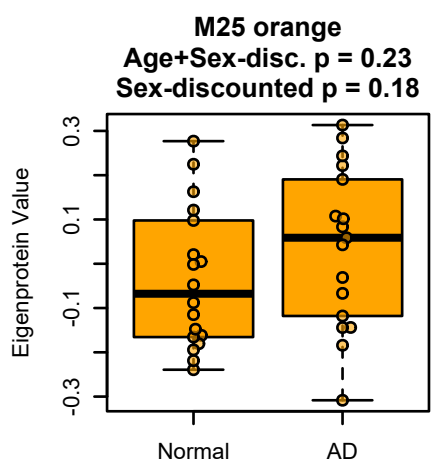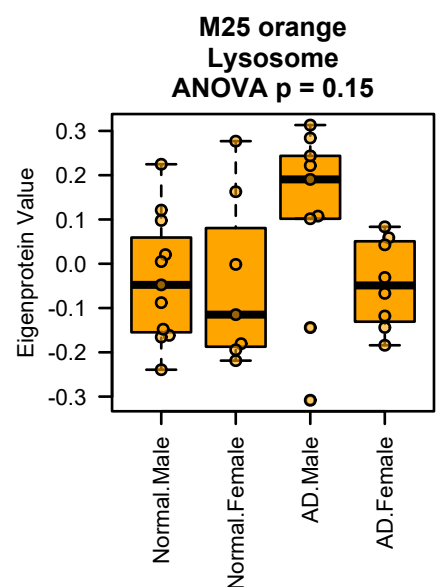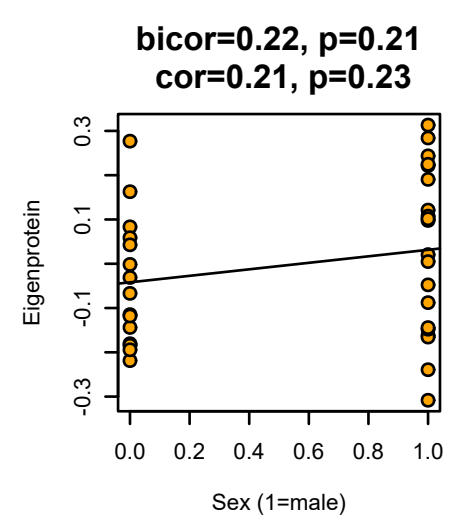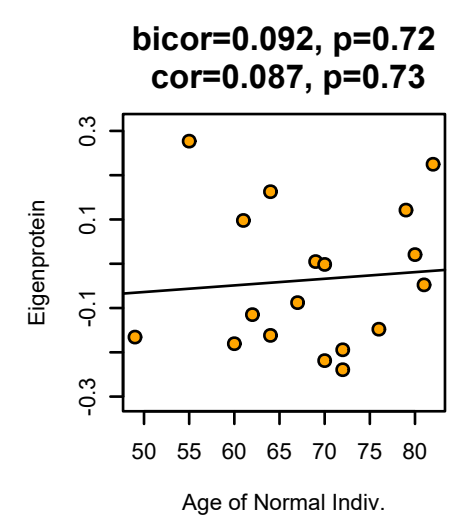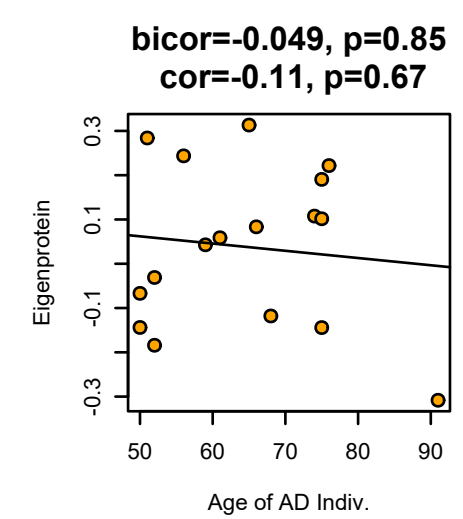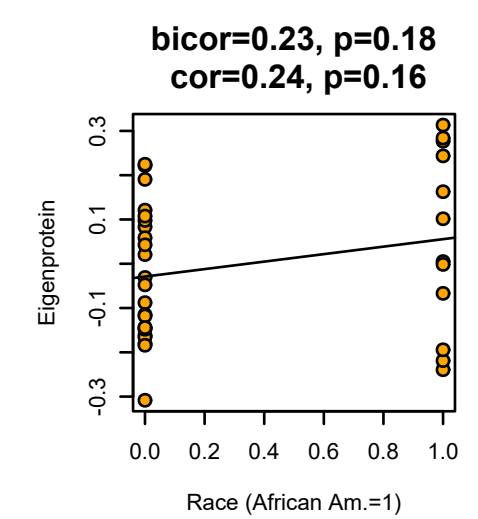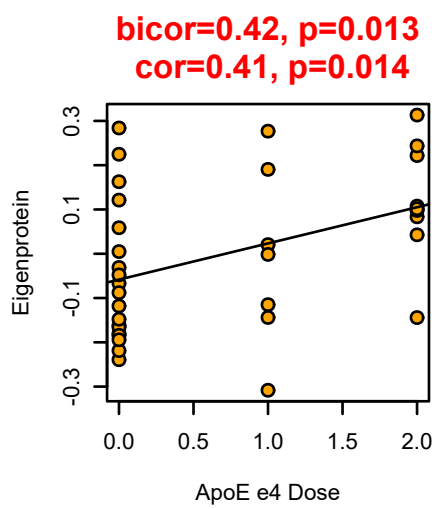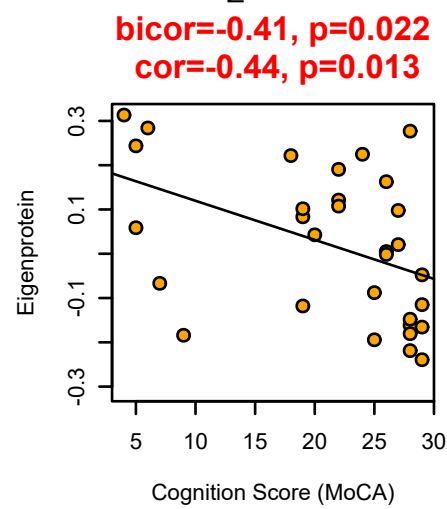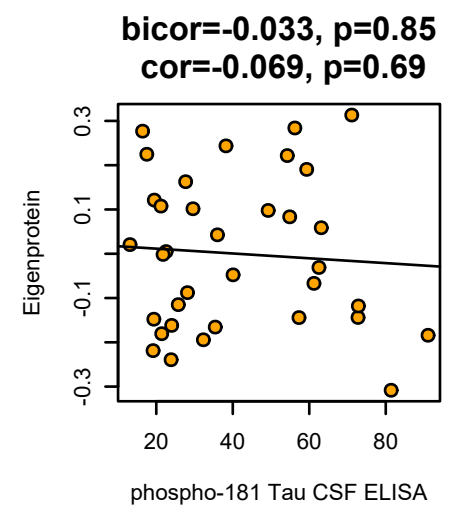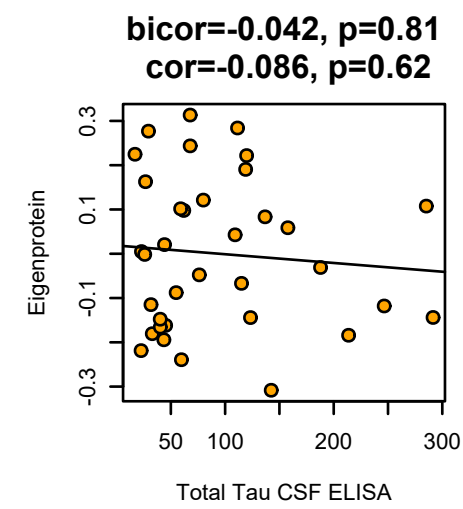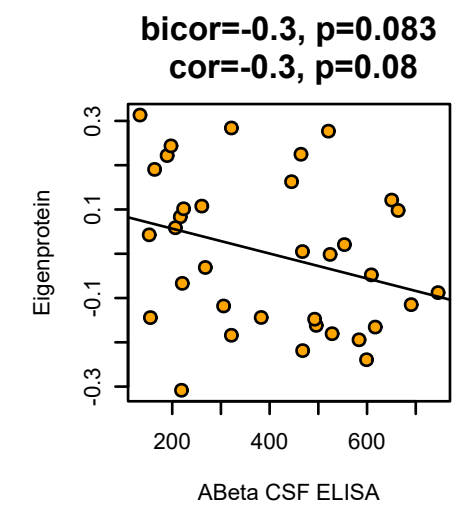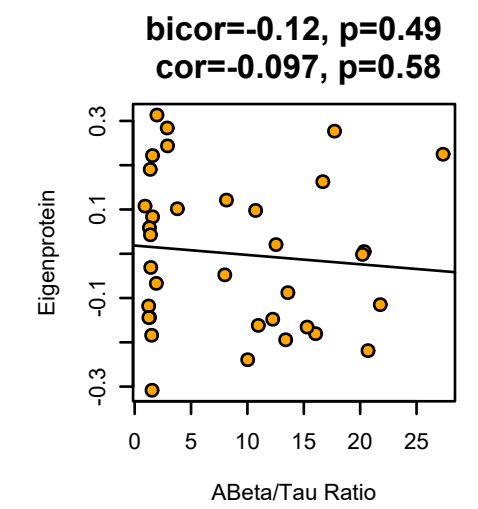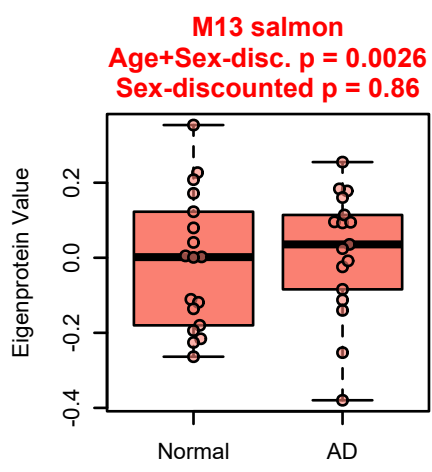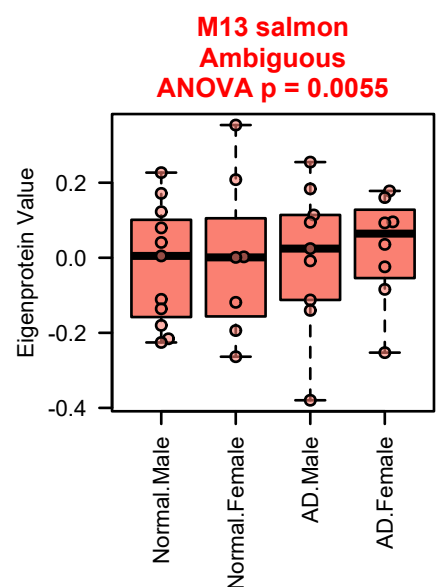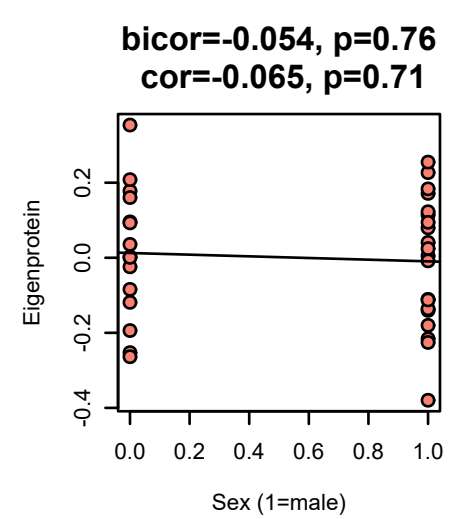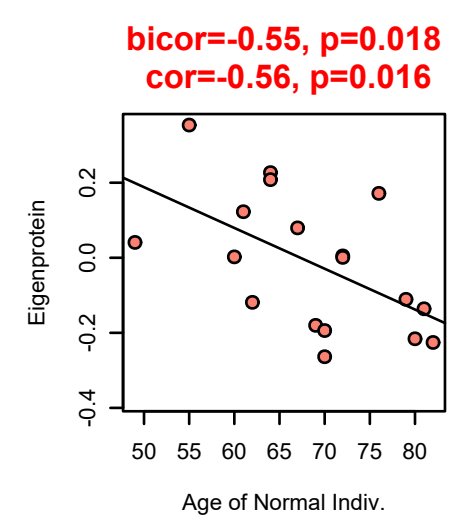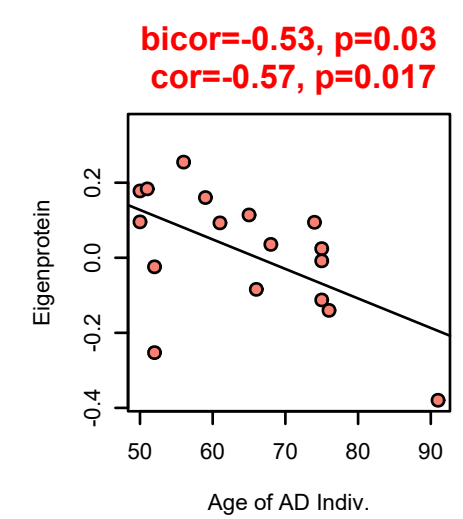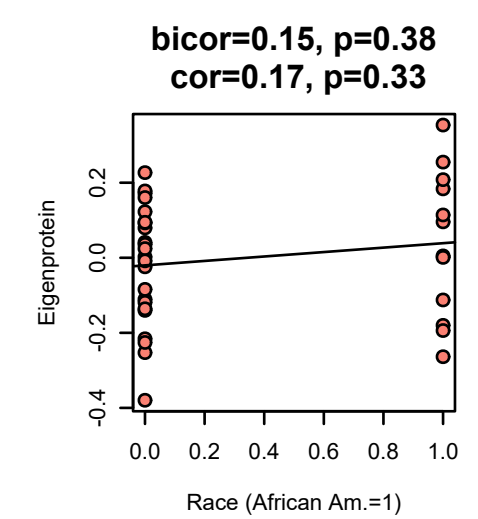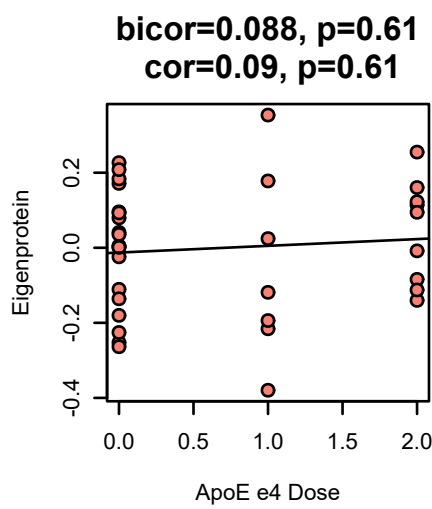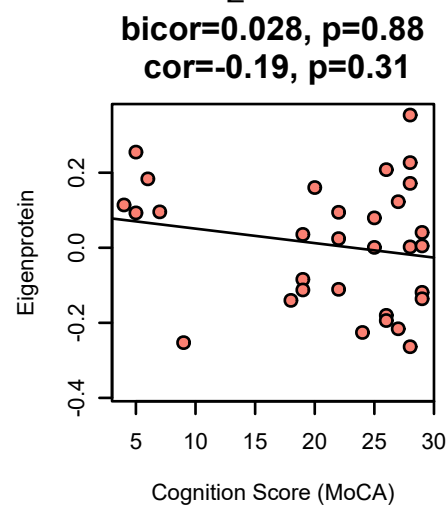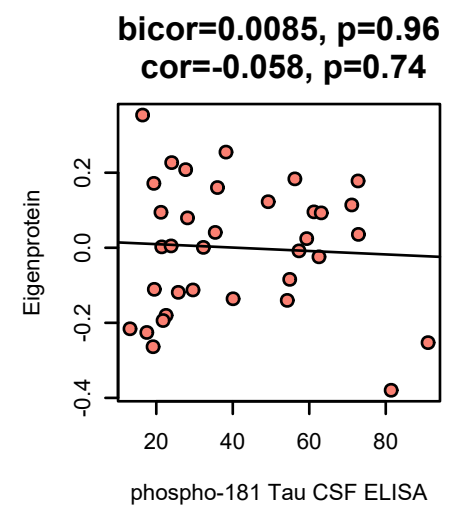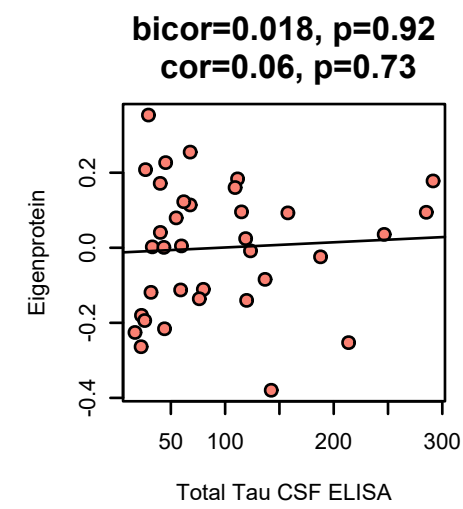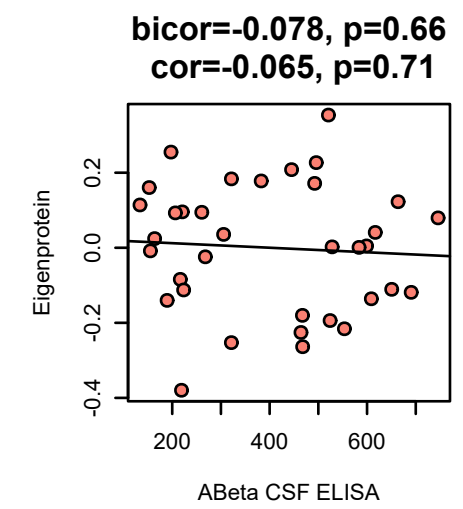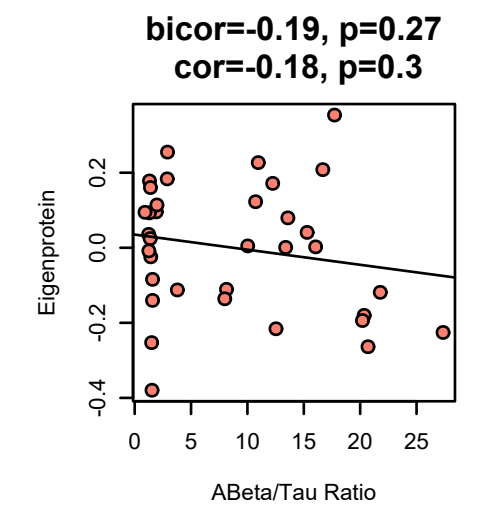

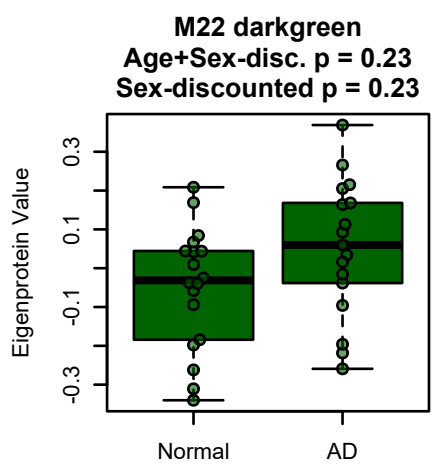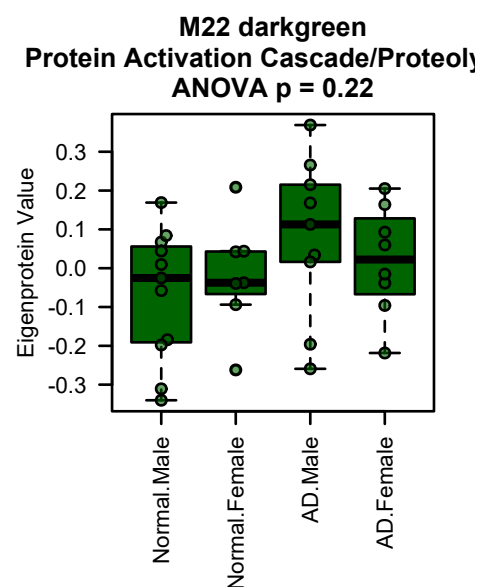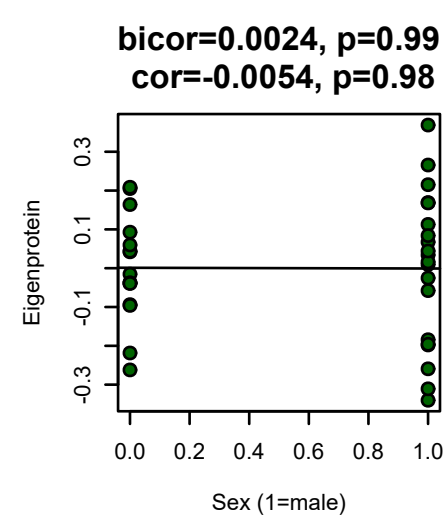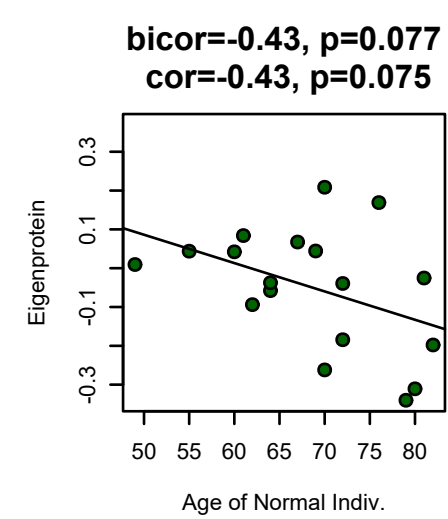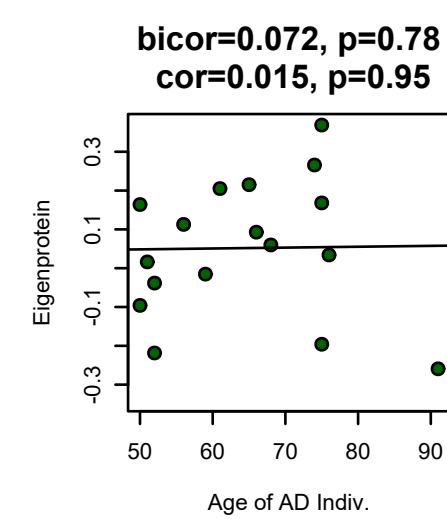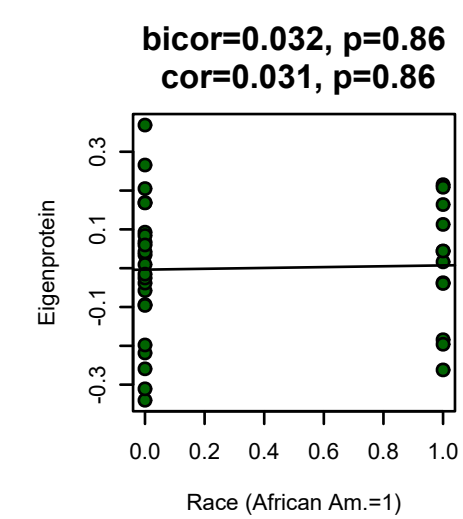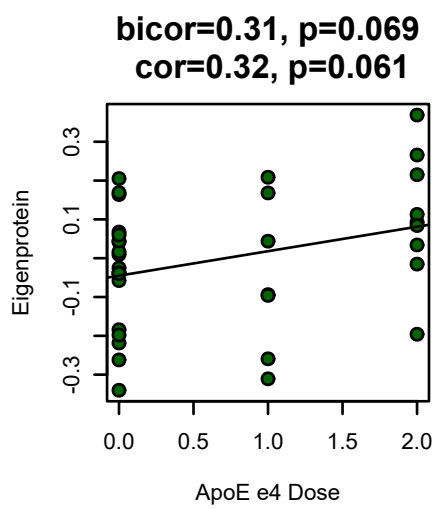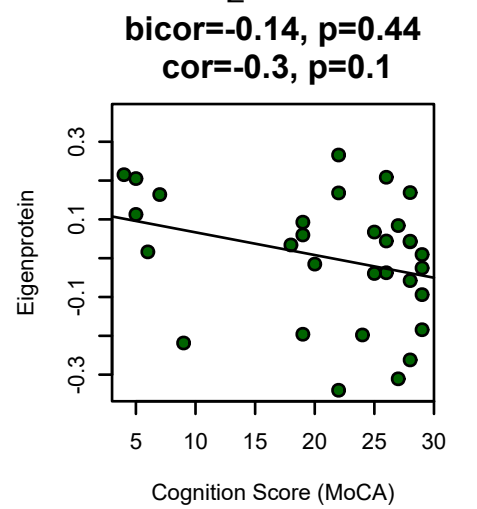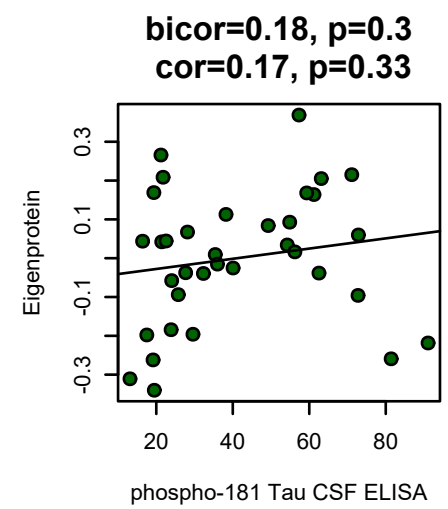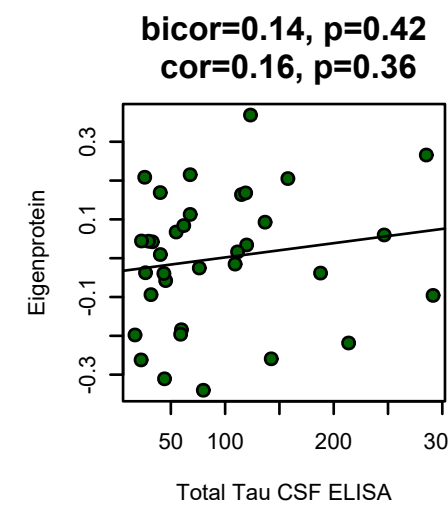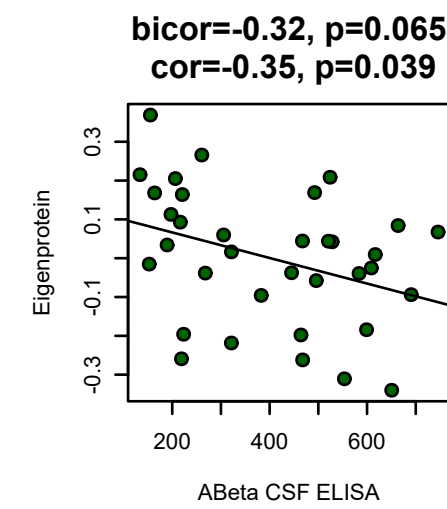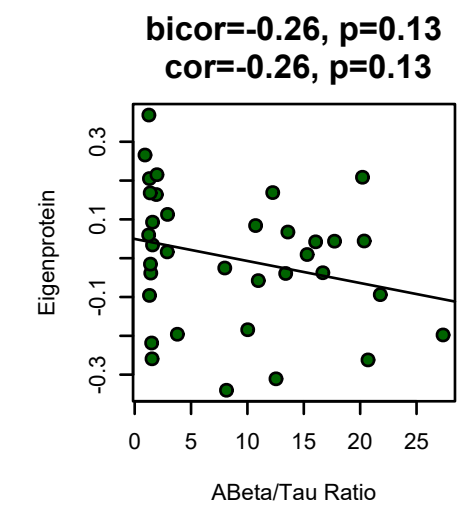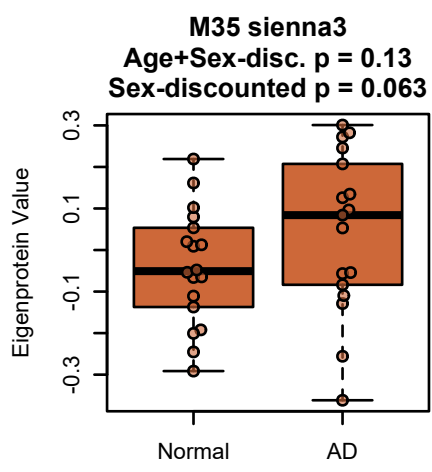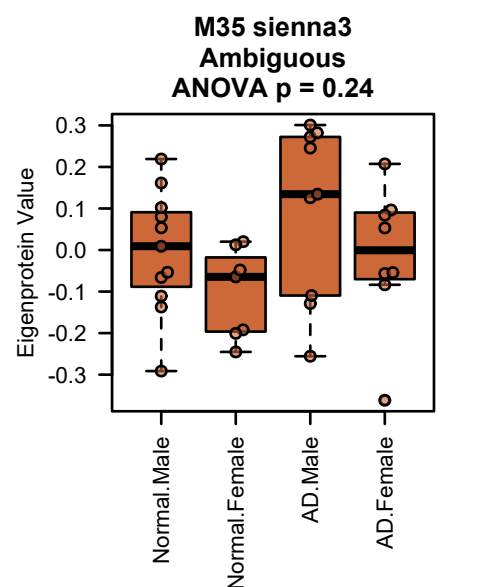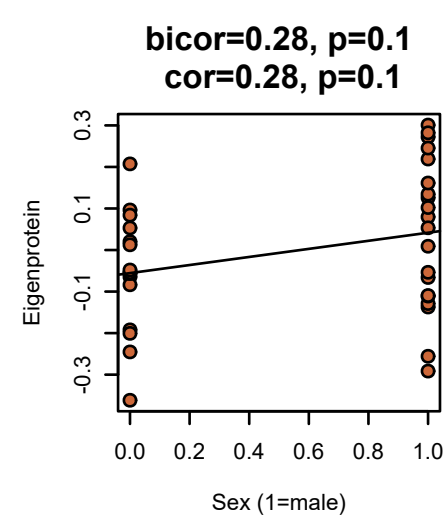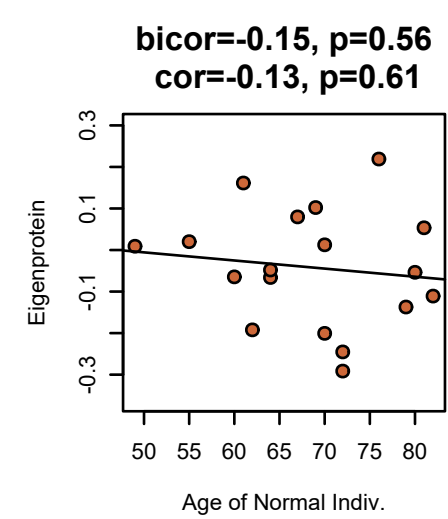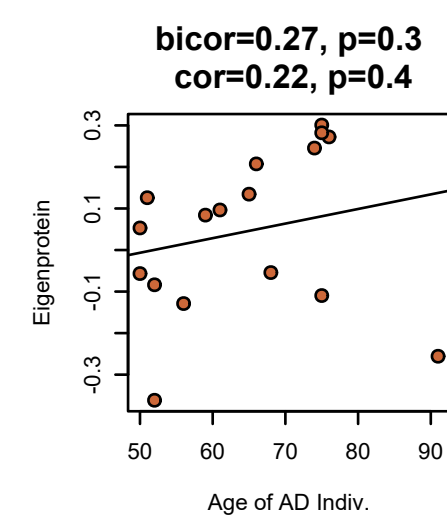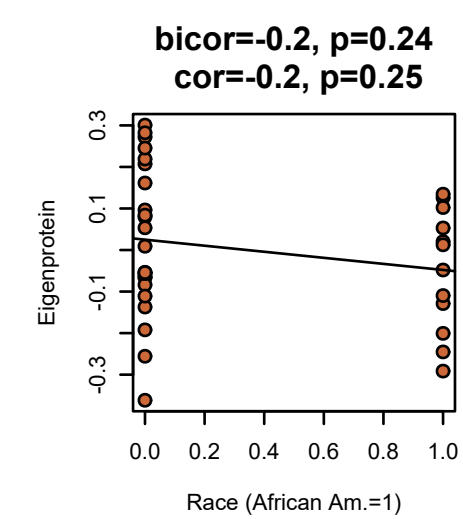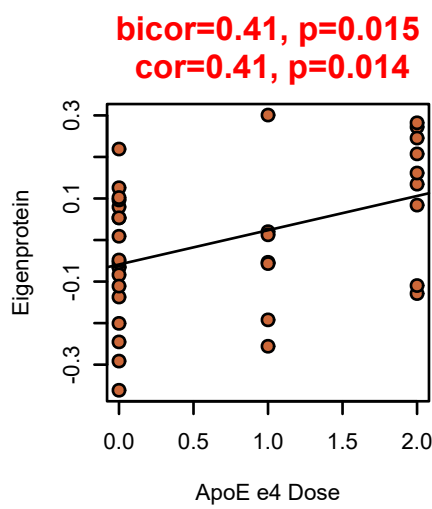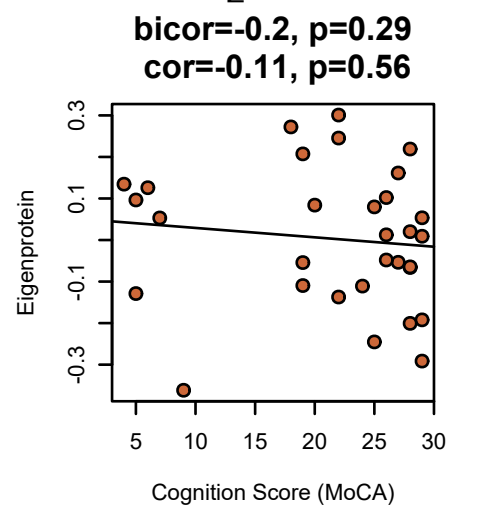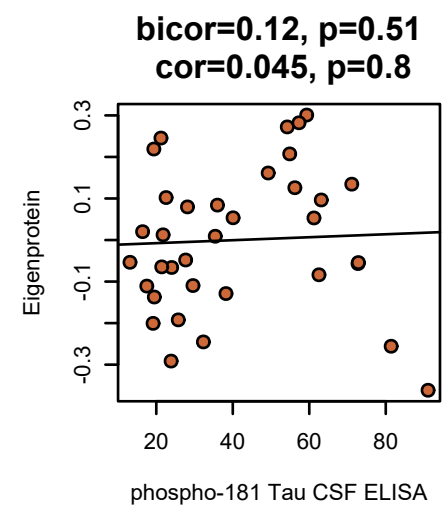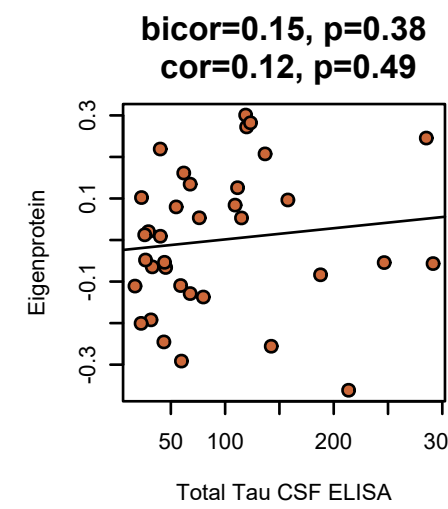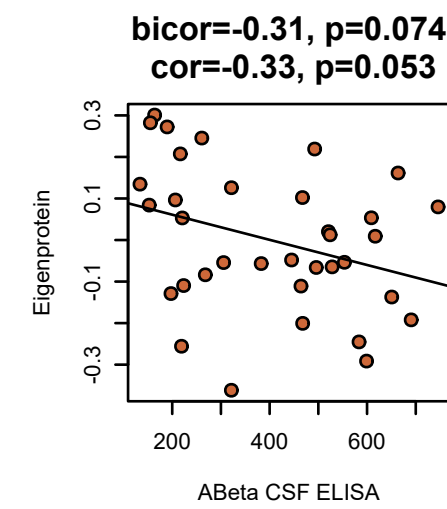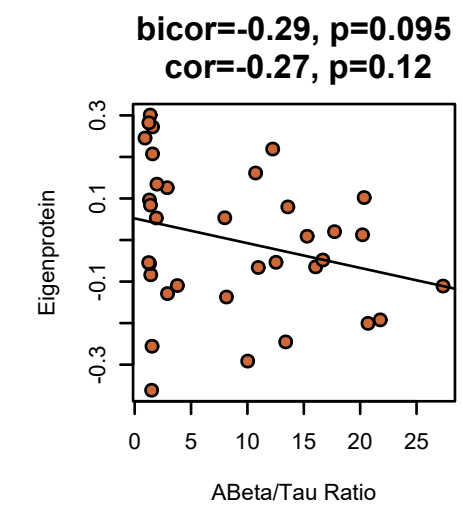

**M16 lightcyan**  
Age+Sex-disc.  $p = 0.076$   
Sex-discounted  $p = 0.036$

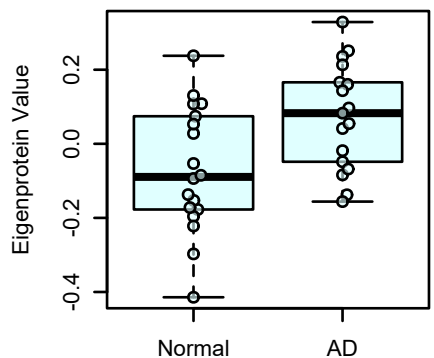

**M16 lightcyan**  
Complement/Protein Activation Casc  
ANOVA  $p = 0.11$

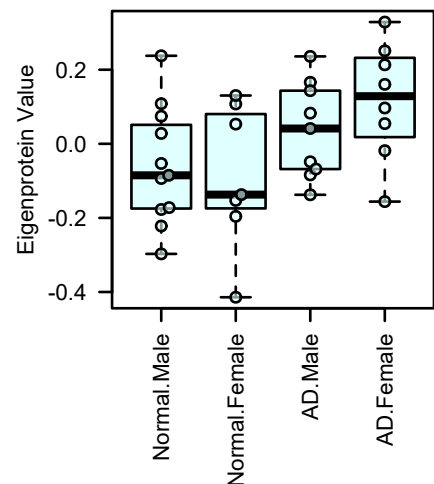

**bicor=-0.13, p=0.46**  
**cor=-0.11, p=0.53**

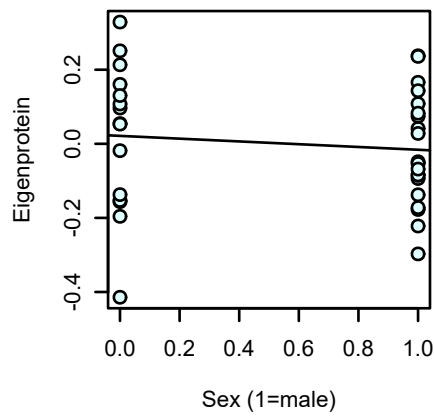

**bicor=-0.098, p=0.7**  
**cor=-0.076, p=0.76**

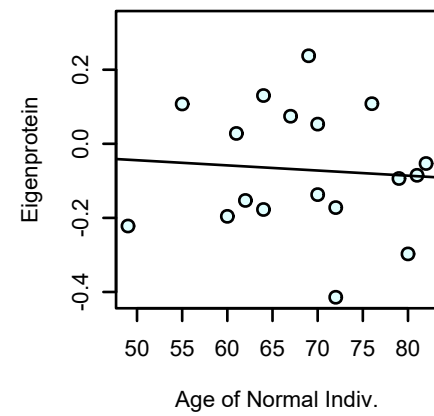

**bicor=-0.18, p=0.48**  
**cor=-0.19, p=0.47**

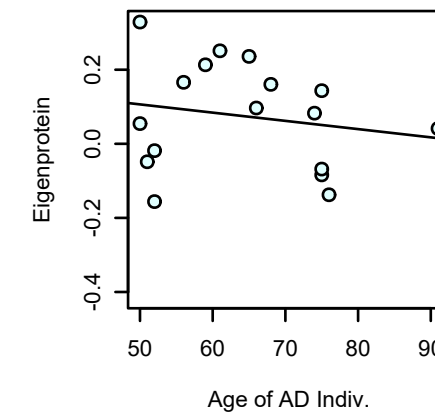

**bicor=0.17, p=0.33**  
**cor=0.15, p=0.39**

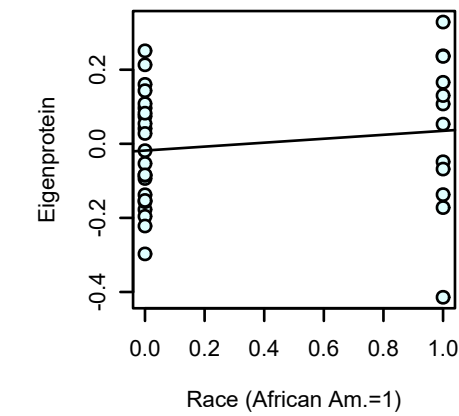

**bicor=0.25, p=0.14**  
**cor=0.25, p=0.15**

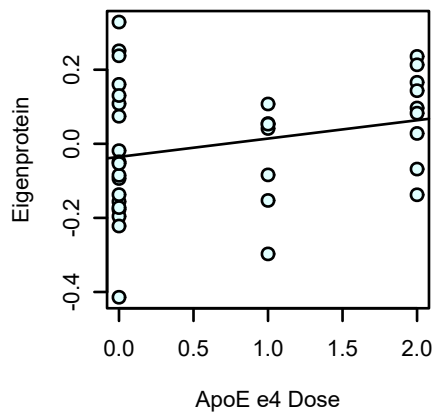

**bicor=-0.43, p=0.015**  
**cor=-0.51, p=0.0034**

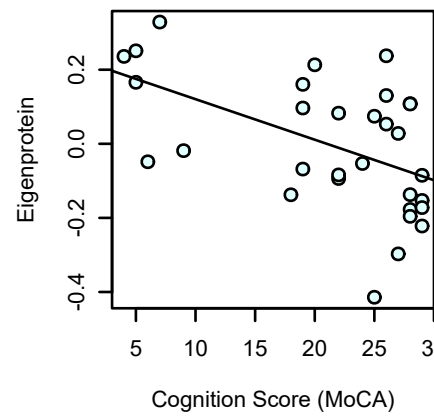

**bicor=0.27, p=0.11**  
**cor=0.31, p=0.07**

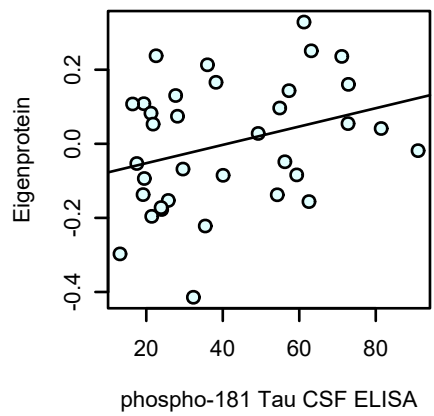

**bicor=0.21, p=0.22**  
**cor=0.25, p=0.15**

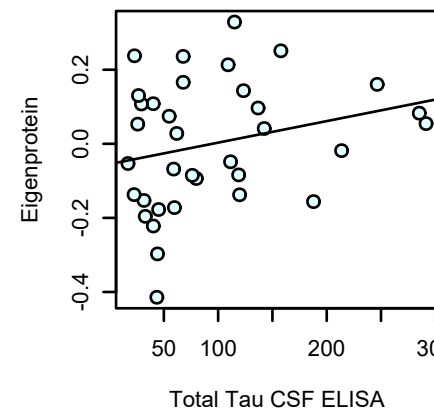

**bicor=-0.43, p=0.01**  
**cor=-0.48, p=0.0035**

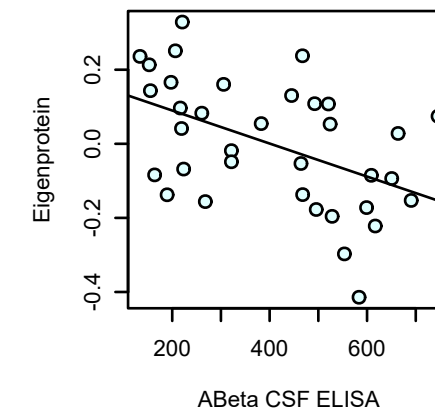

**bicor=-0.32, p=0.061**  
**cor=-0.31, p=0.07**

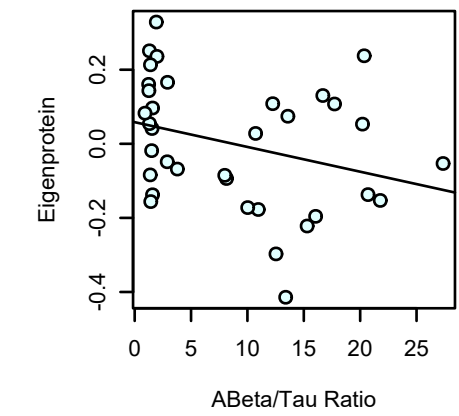

**M8 pink**  
Age+Sex-disc.  $p = 0.0024$   
Sex-discounted  $p = 0.017$

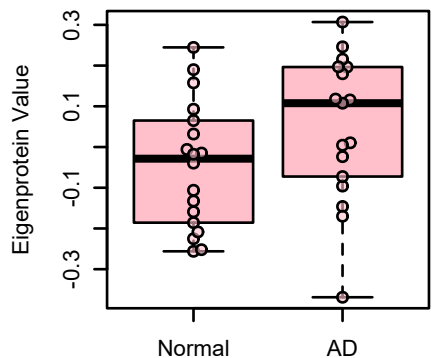

**M8 pink**  
Protein Activation Cascade  
ANOVA  $p = 0.0031$

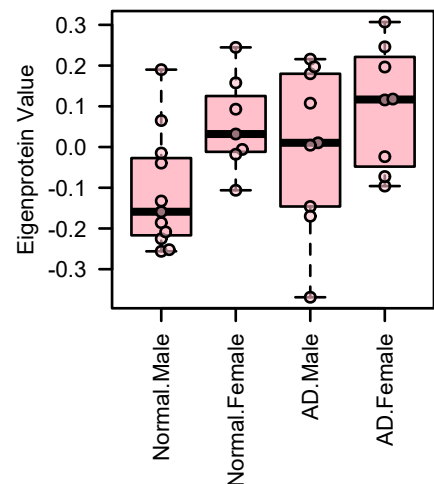

**bicor=-0.4, p=0.017**  
**cor=-0.41, p=0.014**

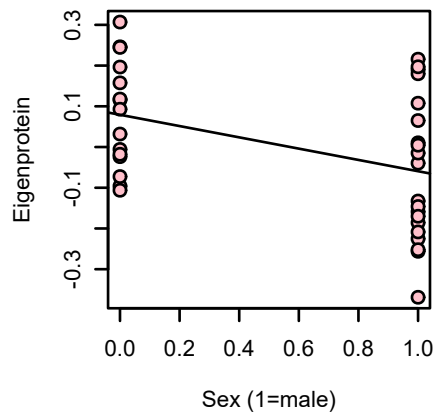

**bicor=-0.52, p=0.026**  
**cor=-0.52, p=0.027**

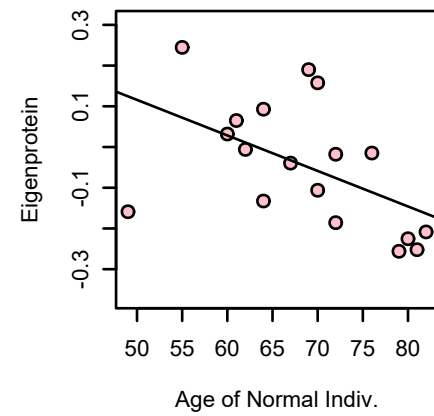

**bicor=-0.42, p=0.091**  
**cor=-0.55, p=0.022**

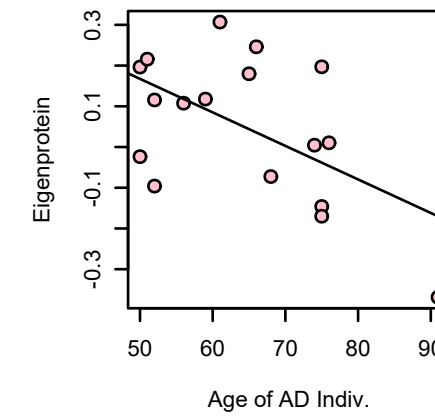

**bicor=0.33, p=0.056**  
**cor=0.32, p=0.061**

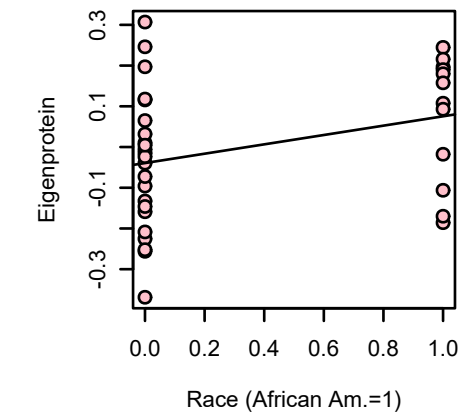

**bicor=0.24, p=0.16**  
**cor=0.23, p=0.18**

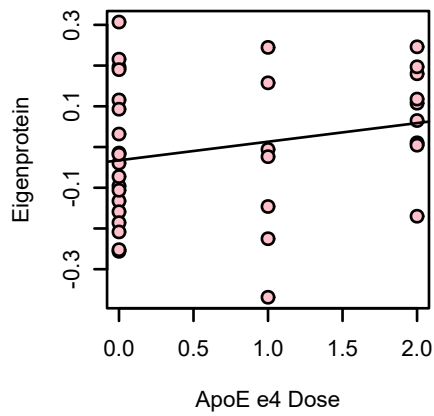

**bicor=-0.35, p=0.057**  
**cor=-0.53, p=0.0022**

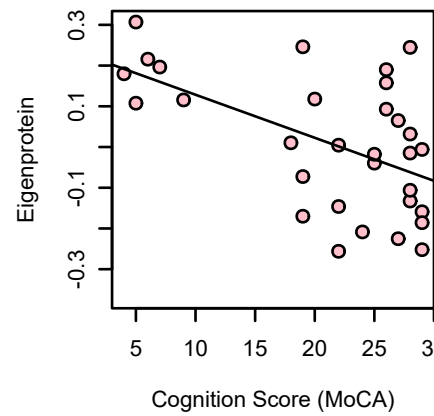

**bicor=0.22, p=0.21**  
**cor=0.18, p=0.3**

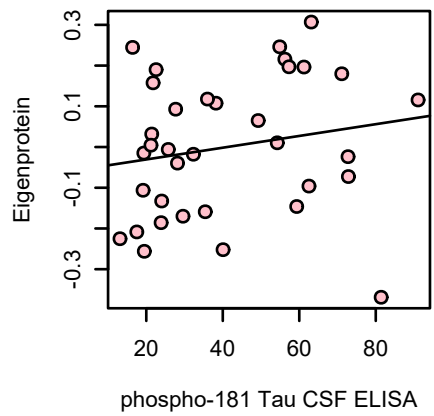

**bicor=0.12, p=0.49**  
**cor=0.069, p=0.69**

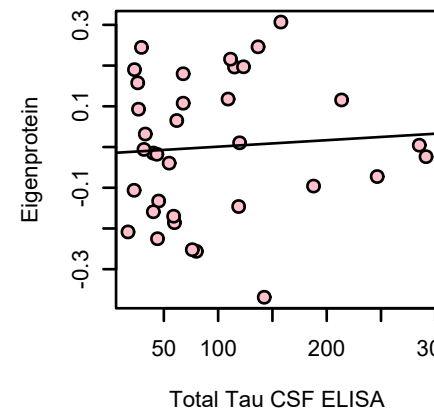

**bicor=-0.34, p=0.049**  
**cor=-0.33, p=0.053**

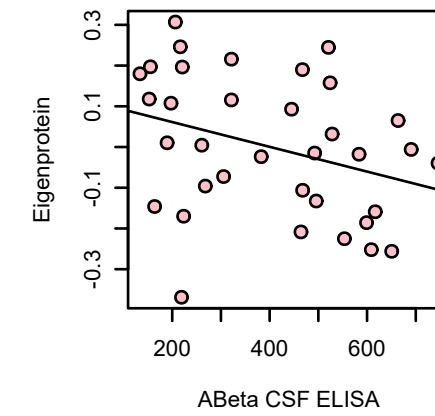

**bicor=-0.13, p=0.45**  
**cor=-0.13, p=0.46**

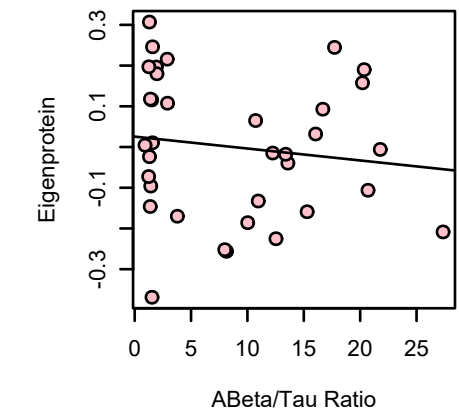

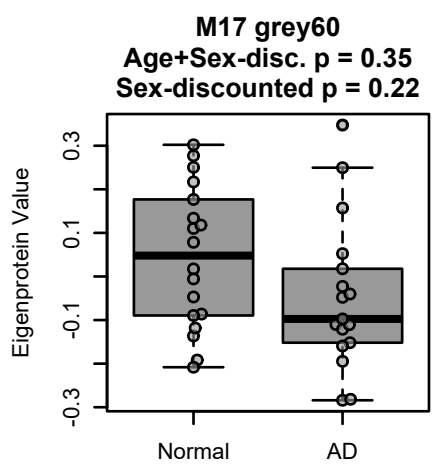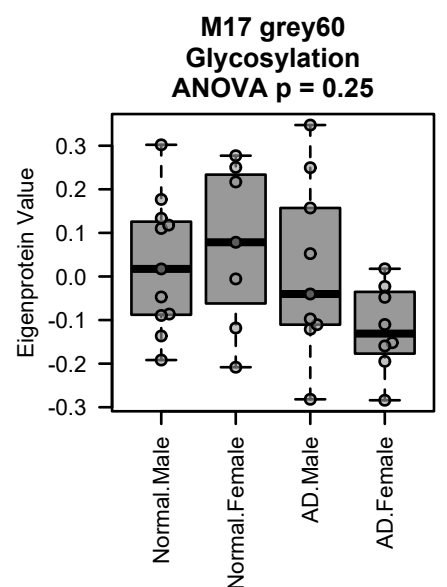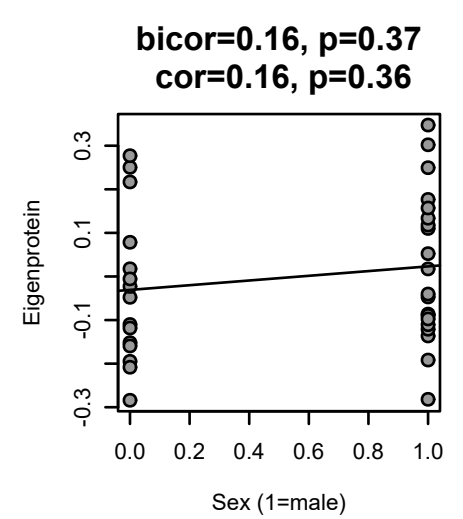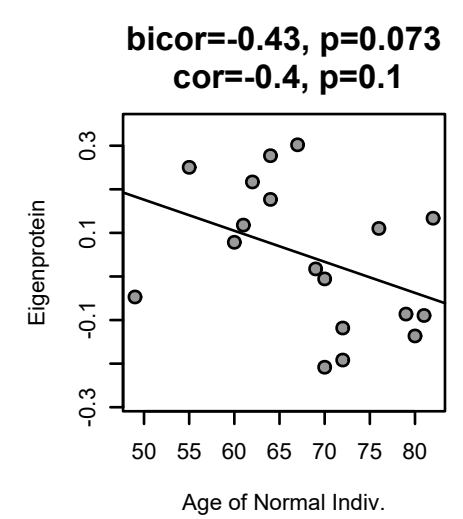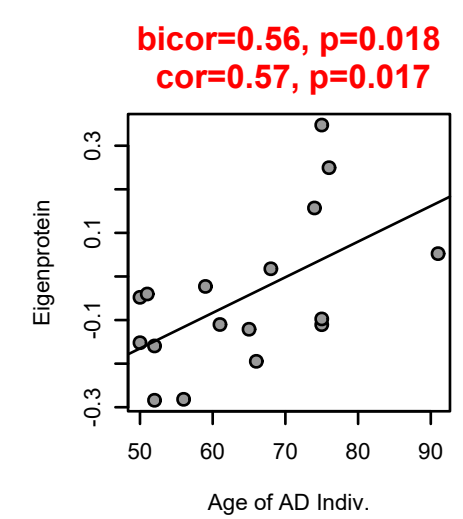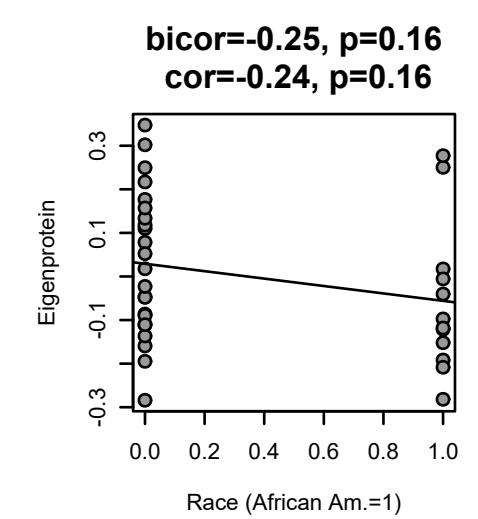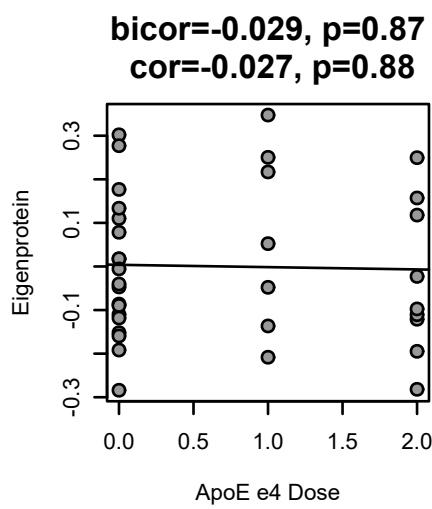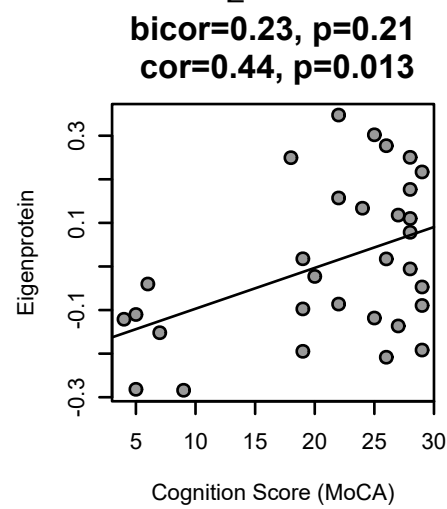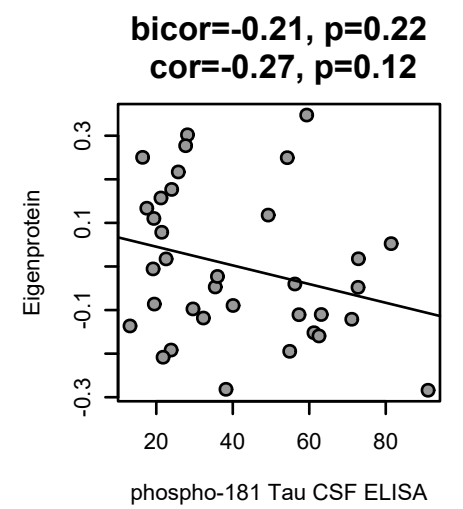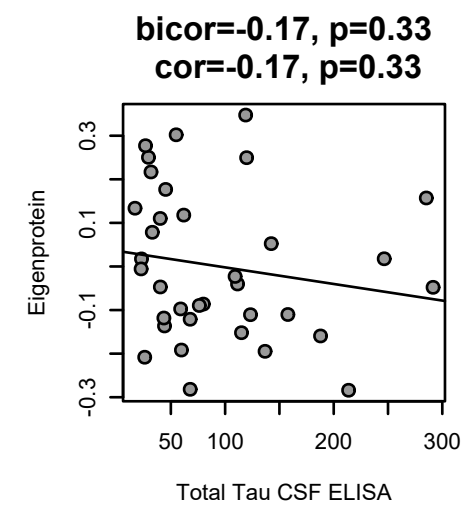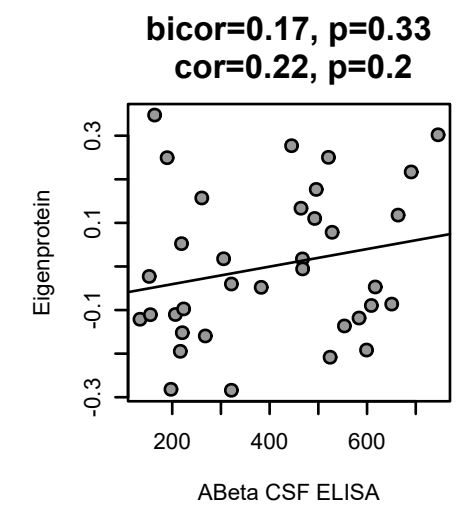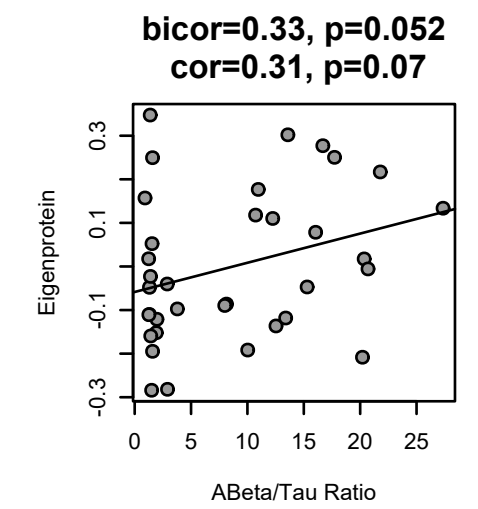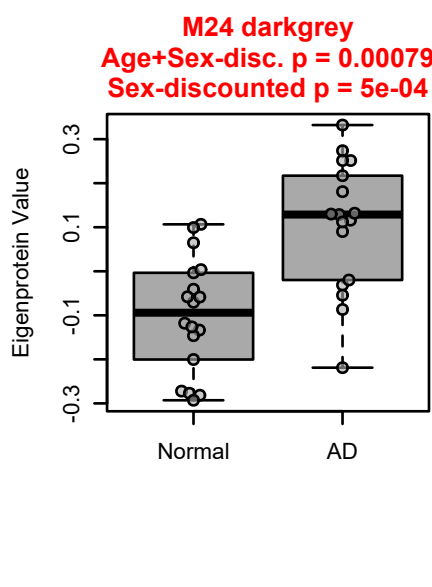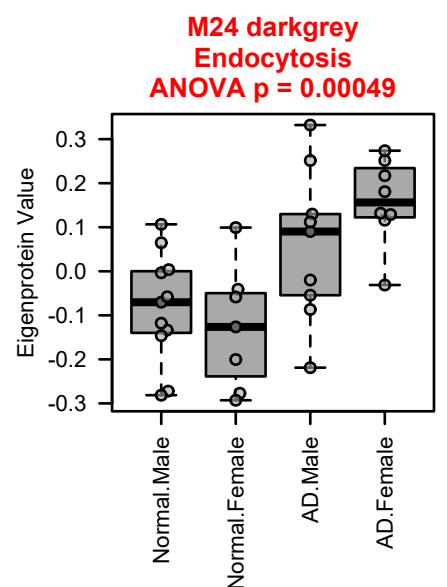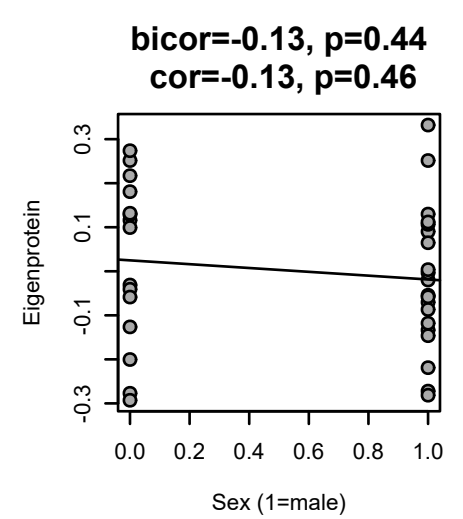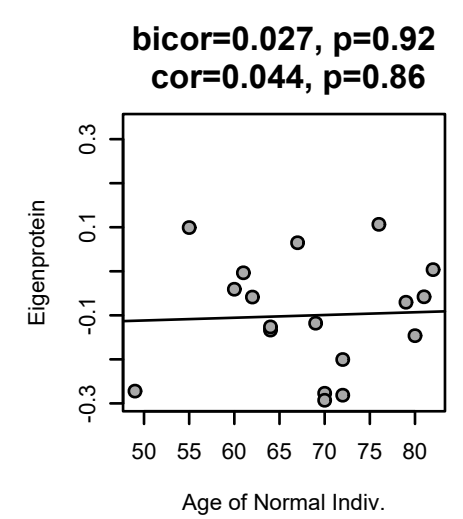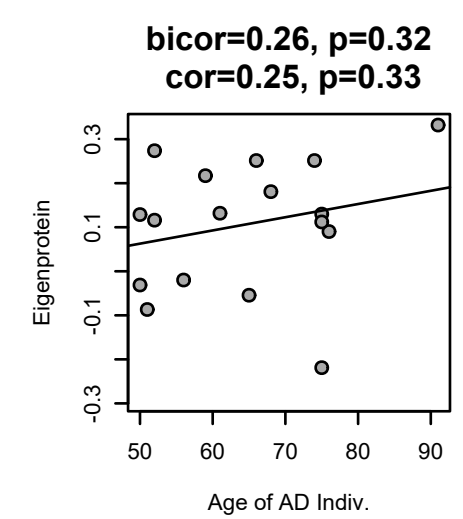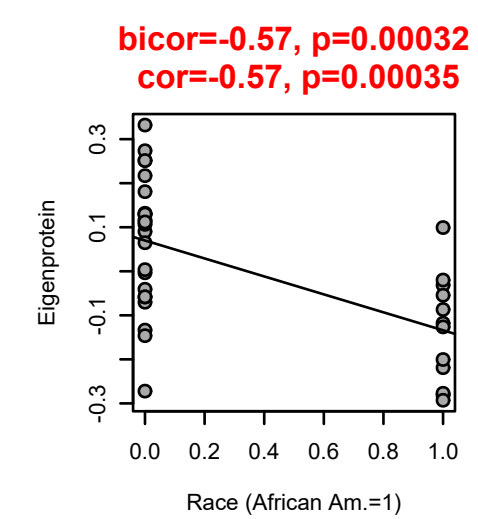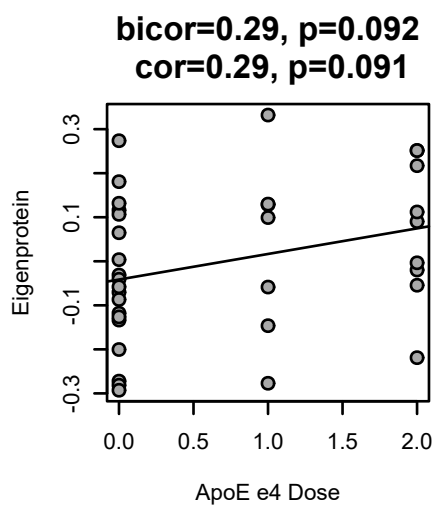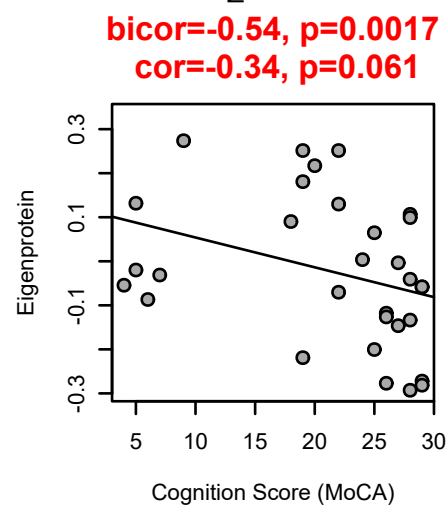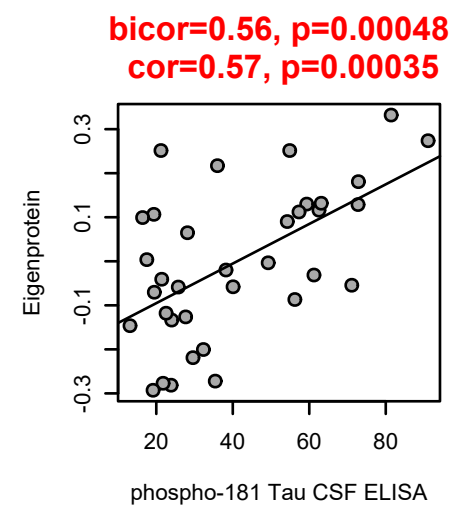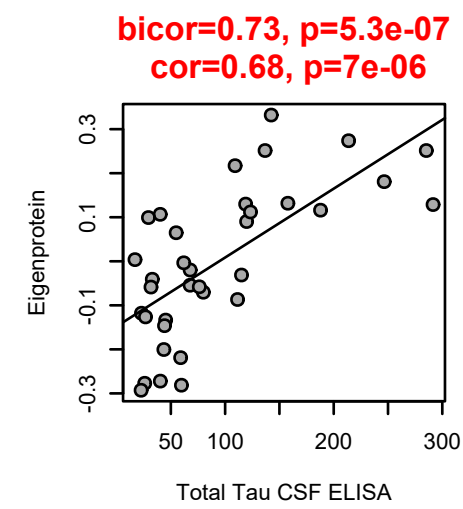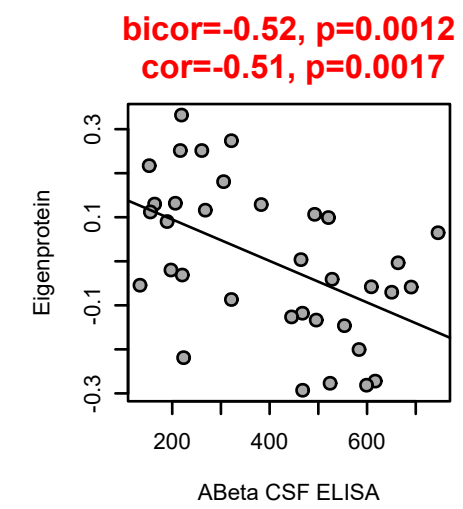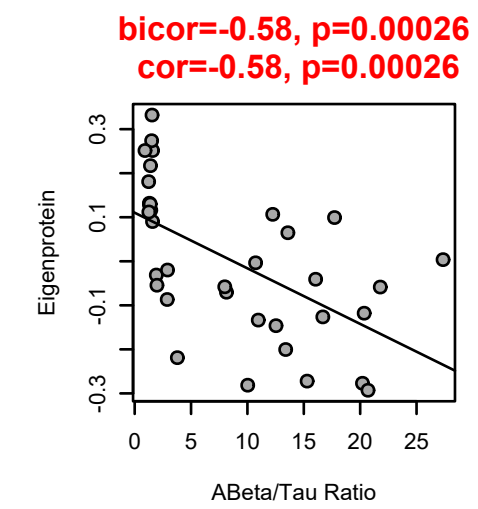

**M33 darkolivegreen**  
Age+Sex-disc.  $p = 0.00017$   
Sex-discounted  $p = 0.00014$

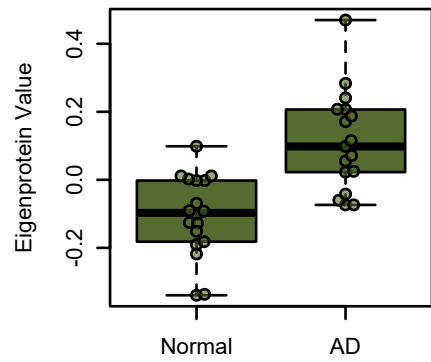

**M33 darkolivegreen**  
Adhesion/ECM/Wound Response  
ANOVA  $p = 0.00035$

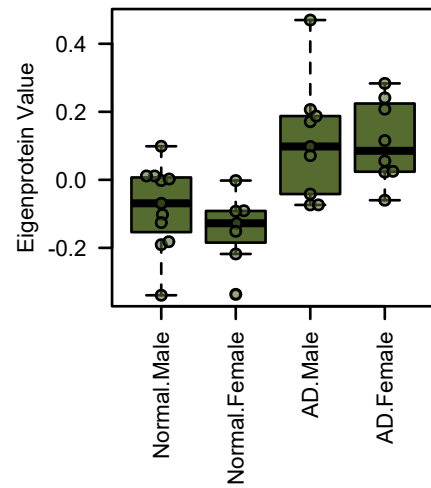

bicor=0.024,  $p=0.89$   
cor=0.044,  $p=0.8$

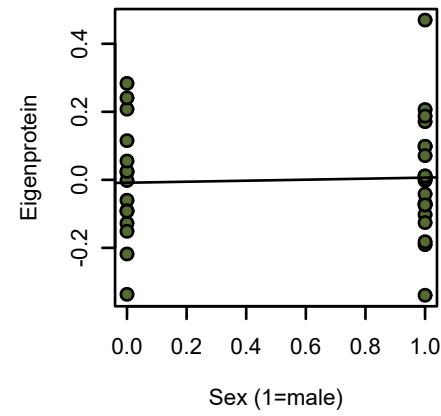

bicor=0.34,  $p=0.17$   
cor=0.37,  $p=0.13$

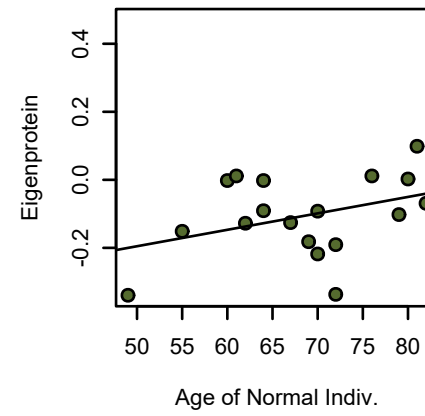

bicor=0.16,  $p=0.53$   
cor=0.26,  $p=0.31$

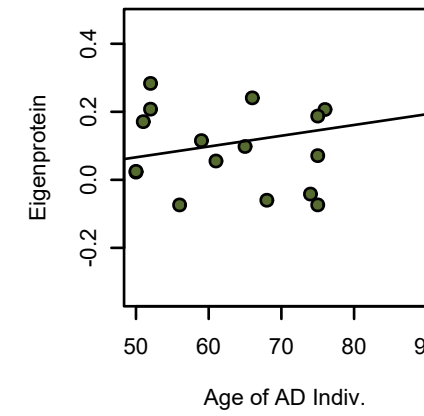

bicor=-0.41,  $p=0.013$   
cor=-0.4,  $p=0.017$

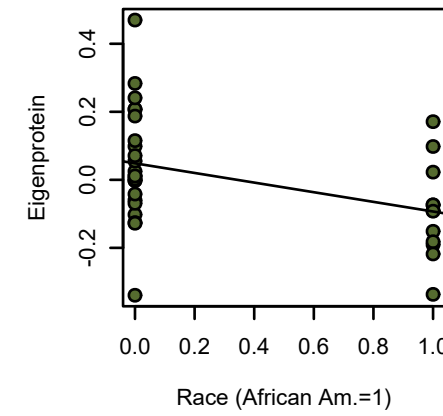

bicor=0.29,  $p=0.088$   
cor=0.28,  $p=0.1$

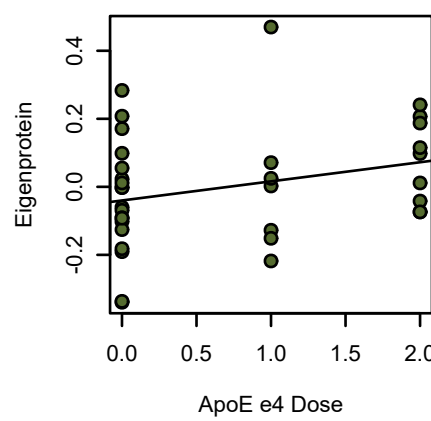

bicor=-0.55,  $p=0.0012$   
cor=-0.51,  $p=0.0034$

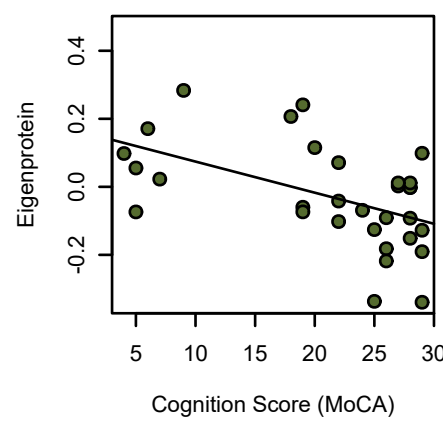

bicor=0.66,  $p=1.4e-05$   
cor=0.67,  $p=1.1e-05$

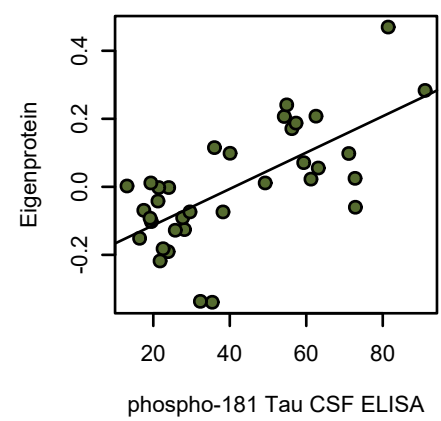

bicor=0.63,  $p=4.5e-05$   
cor=0.47,  $p=0.0044$

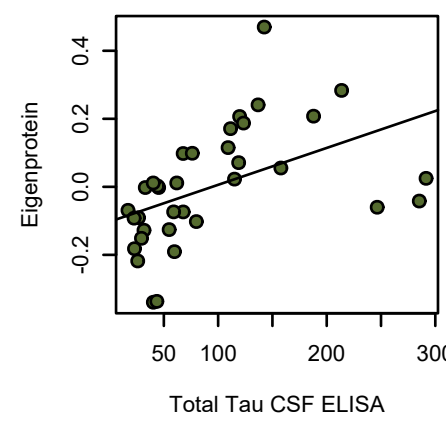

bicor=-0.62,  $p=8.3e-05$   
cor=-0.61,  $p=1e-04$

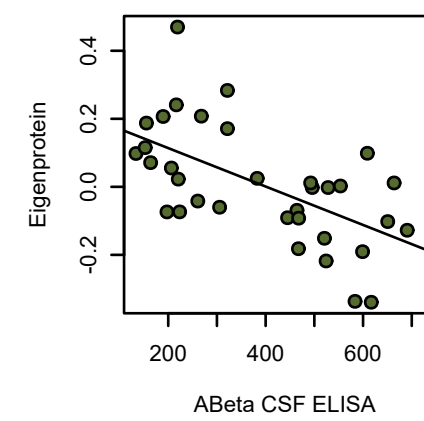

bicor=-0.69,  $p=4.3e-06$   
cor=-0.64,  $p=3.5e-05$

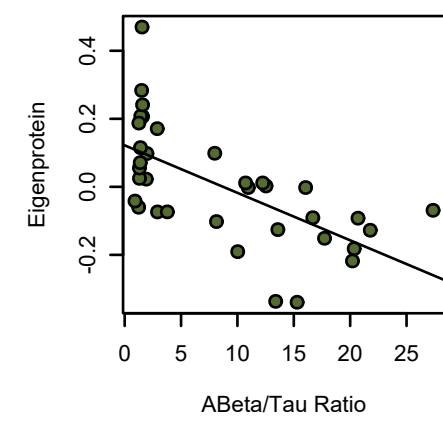

**M10 purple**  
Age+Sex-disc.  $p = 0.0034$   
Sex-discounted  $p = 0.0019$

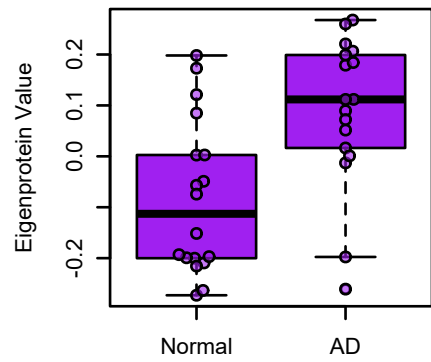

**M10 purple**  
Ambiguous  
ANOVA  $p = 0.0091$

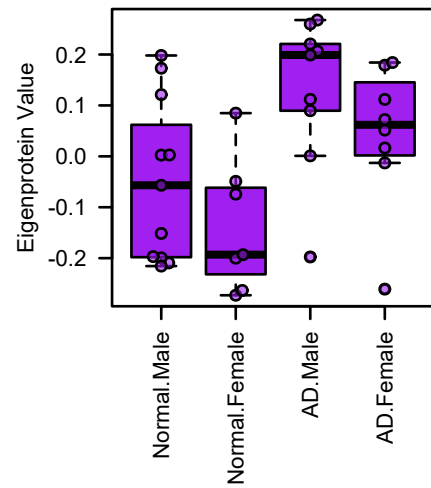

bicor=0.21,  $p=0.23$   
cor=0.21,  $p=0.23$

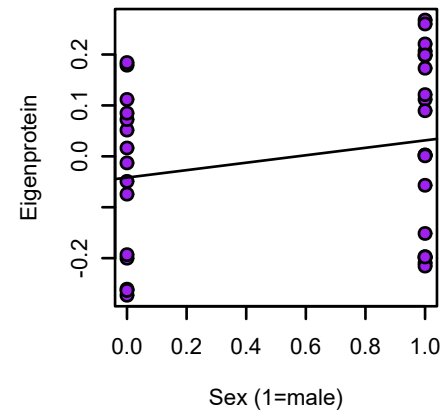

bicor=-0.17,  $p=0.49$   
cor=-0.14,  $p=0.58$

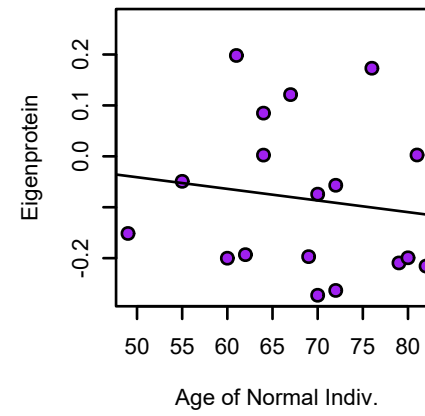

bicor=0.037,  $p=0.89$   
cor=0.052,  $p=0.84$

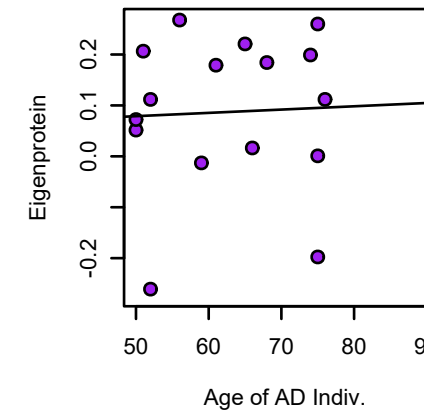

bicor=-0.1,  $p=0.56$   
cor=-0.1,  $p=0.57$

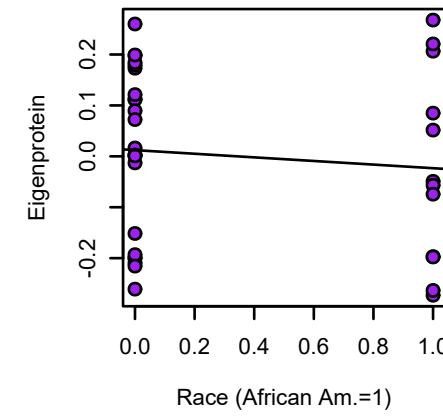

bicor=0.3,  $p=0.082$   
cor=0.3,  $p=0.08$

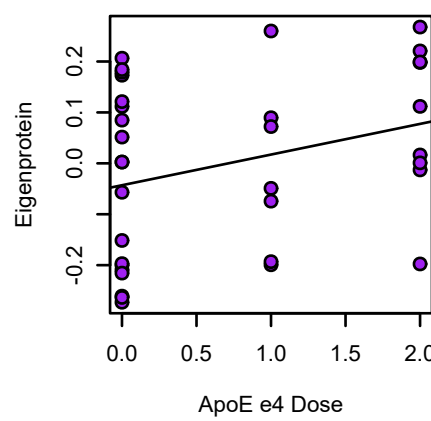

bicor=-0.29,  $p=0.11$   
cor=-0.43,  $p=0.016$

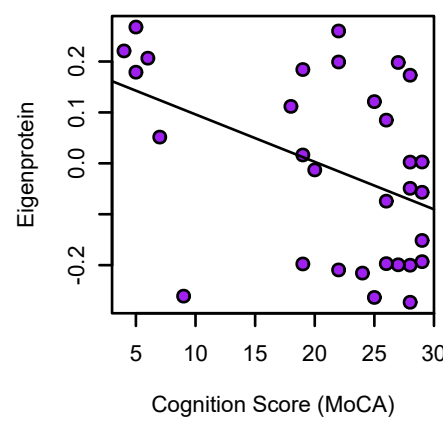

bicor=0.46,  $p=0.0056$   
cor=0.42,  $p=0.012$

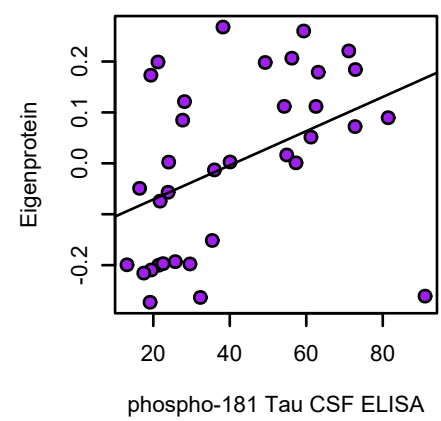

bicor=0.43,  $p=0.0094$   
cor=0.4,  $p=0.017$

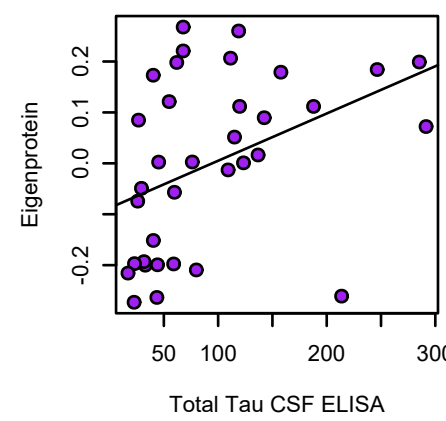

bicor=-0.44,  $p=0.0085$   
cor=-0.45,  $p=0.0067$

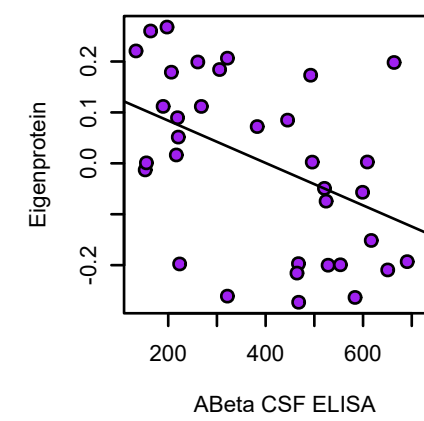

bicor=-0.57,  $p=0.00031$   
cor=-0.57,  $p=0.00035$

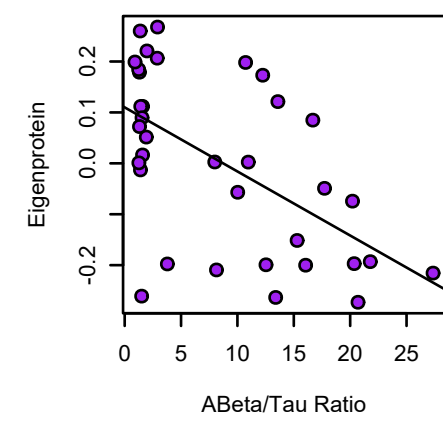



**M6 red**  
Age+Sex-disc.  $p = 0.0025$   
Sex-discounted  $p = 7e-04$

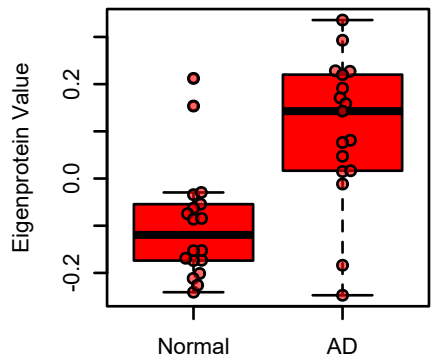

**M6 red**  
Axon Guidance/Nervous System D  
ANOVA  $p = 0.0067$

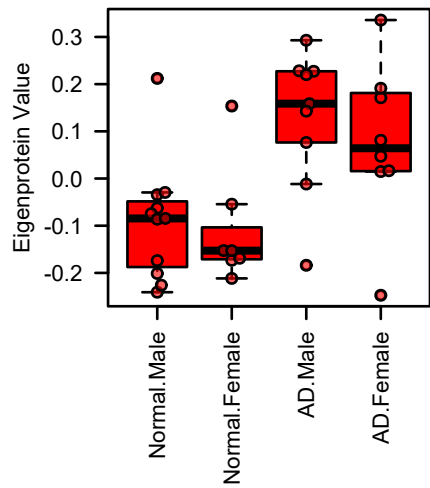

bicor=0.051,  $p=0.77$   
cor=0.051,  $p=0.77$

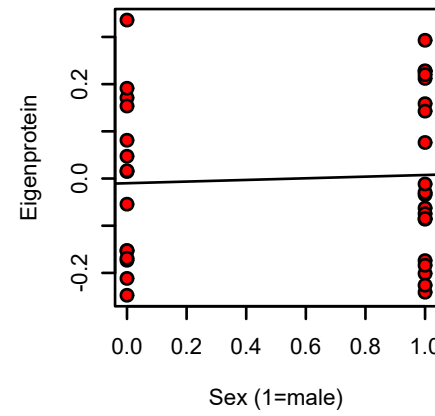

bicor=-0.039,  $p=0.88$   
cor=-0.036,  $p=0.89$

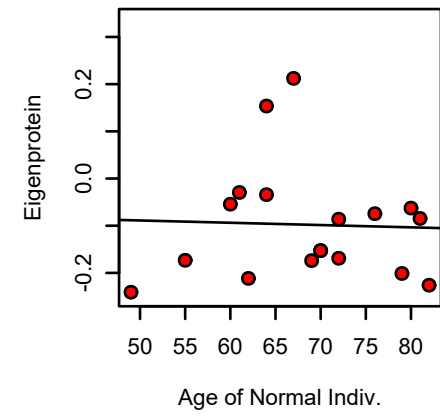

bicor=0.07,  $p=0.79$   
cor=0.092,  $p=0.73$

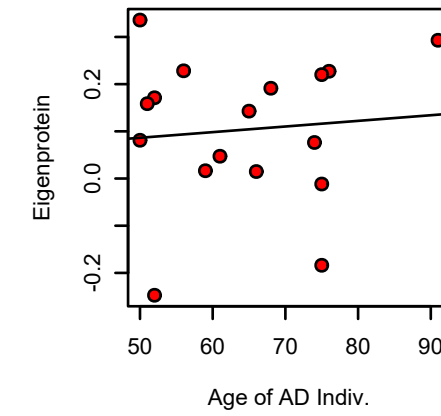

bicor=-0.11,  $p=0.52$   
cor=-0.12,  $p=0.49$

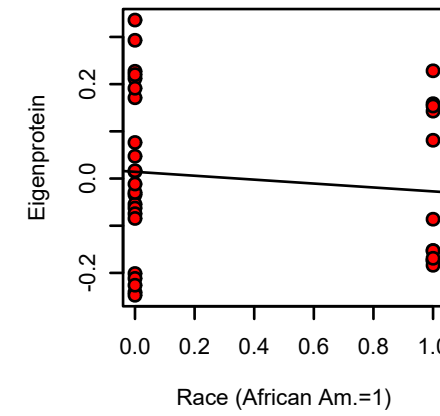

bicor=0.24,  $p=0.17$   
cor=0.24,  $p=0.16$

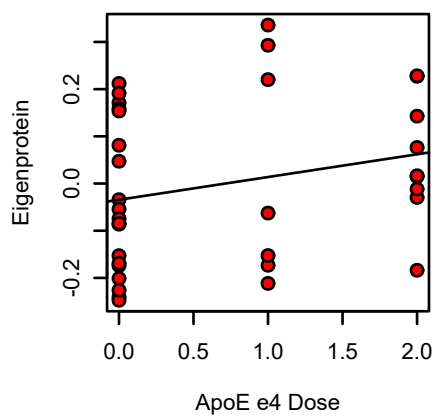

bicor=-0.46,  $p=0.0086$   
cor=-0.46,  $p=0.0092$

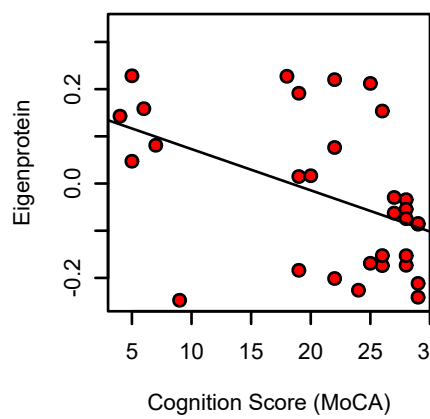

bicor=0.58,  $p=0.00026$   
cor=0.53,  $p=0.0011$

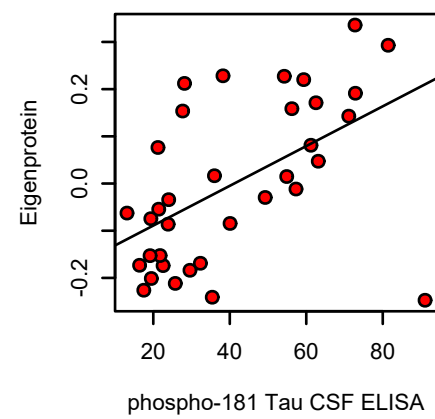

bicor=0.56,  $p=0.00047$   
cor=0.52,  $p=0.0014$

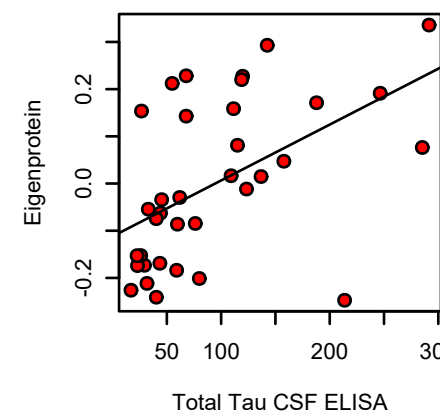

bicor=-0.54,  $p=0.00091$   
cor=-0.5,  $p=0.0022$

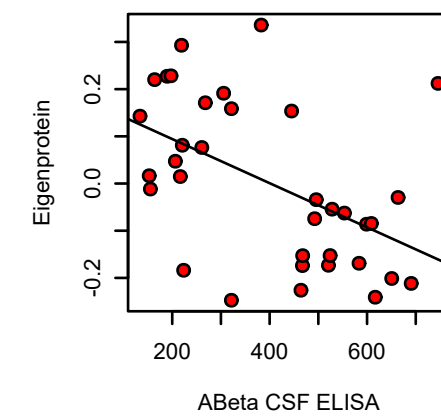

bicor=-0.6,  $p=0.00016$   
cor=-0.61,  $p=1e-04$

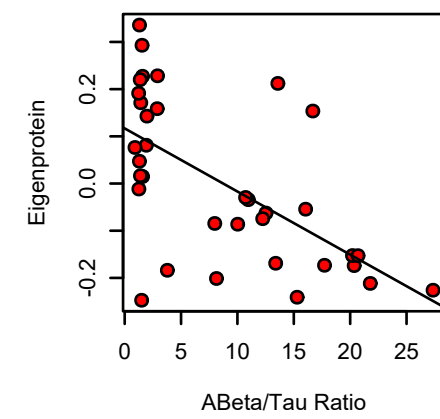

**M12 tan**  
Age+Sex-disc.  $p = 6.4e-05$   
Sex-discounted  $p = 0.00036$

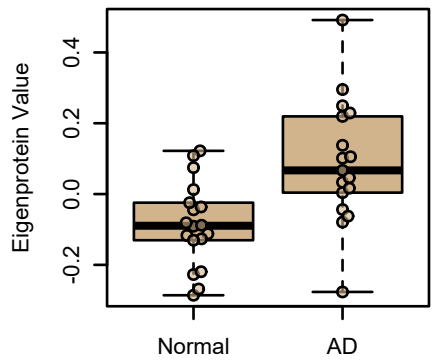

**M12 tan**  
Matrisome  
ANOVA  $p = 0.00023$

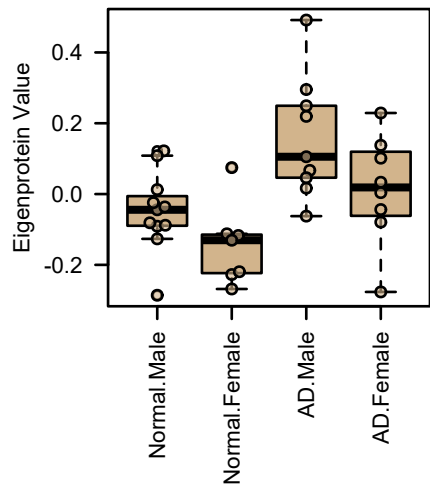

bicor=0.29,  $p=0.088$   
cor=0.31,  $p=0.07$

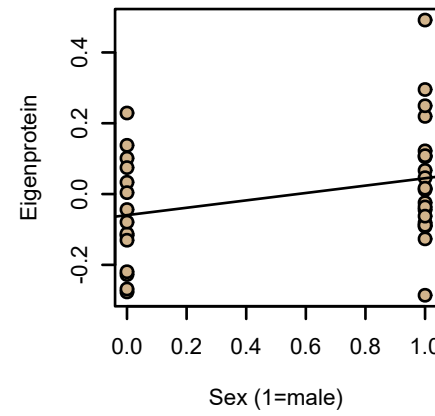

bicor=0.45,  $p=0.063$   
cor=0.46,  $p=0.055$

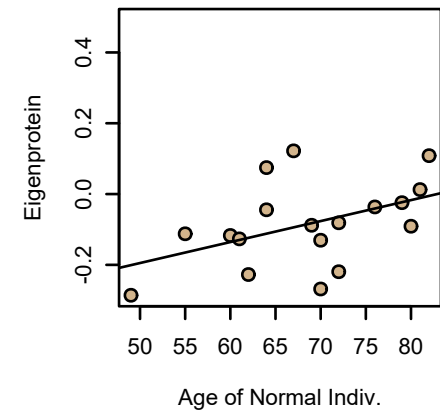

bicor=0.51,  $p=0.036$   
cor=0.58,  $p=0.015$

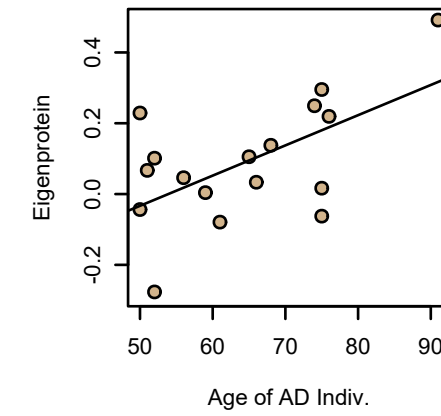

bicor=-0.21,  $p=0.23$   
cor=-0.23,  $p=0.18$

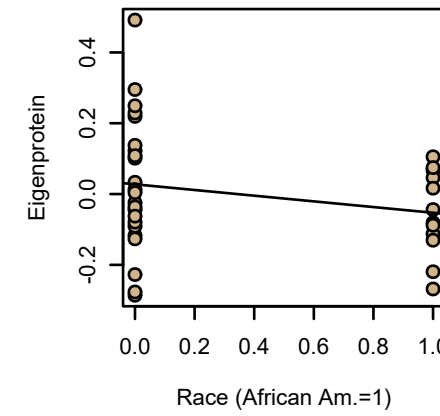

bicor=0.26,  $p=0.13$   
cor=0.26,  $p=0.13$

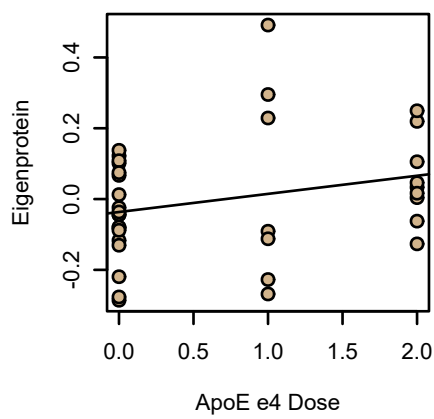

bicor=-0.47,  $p=0.0079$   
cor=-0.25,  $p=0.17$

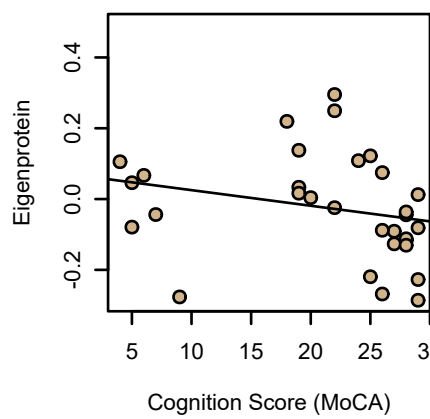

bicor=0.36,  $p=0.034$   
cor=0.36,  $p=0.034$

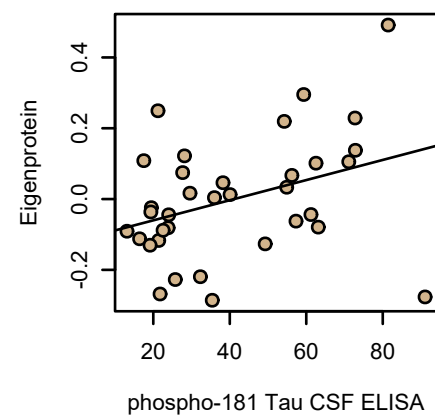

bicor=0.48,  $p=0.0037$   
cor=0.47,  $p=0.0044$

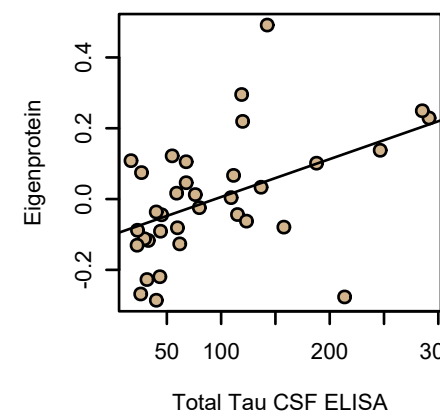

bicor=-0.51,  $p=0.0016$   
cor=-0.49,  $p=0.0028$

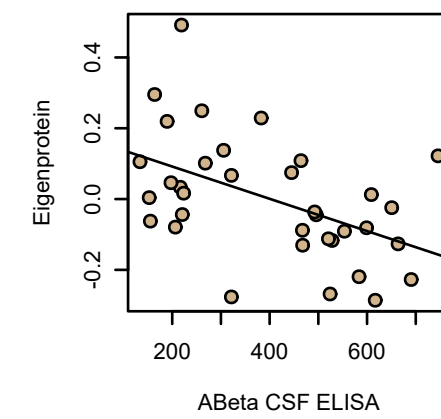

bicor=-0.51,  $p=0.0019$   
cor=-0.49,  $p=0.0028$

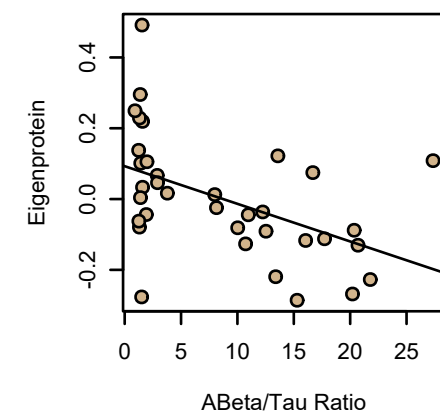

**M5 green**  
Age+Sex-disc.  $p = 0.0025$   
Sex-discounted  $p = 0.013$

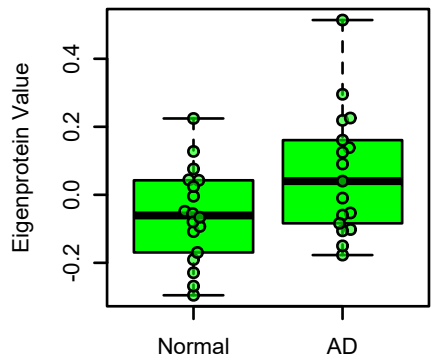

**M5 green**  
ECM/IGF-PDGF Binding  
ANOVA  $p = 0.0056$

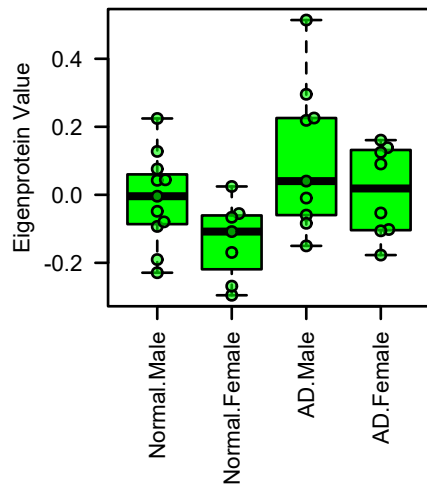

**bicor=0.26, p=0.13**  
**cor=0.29, p=0.091**

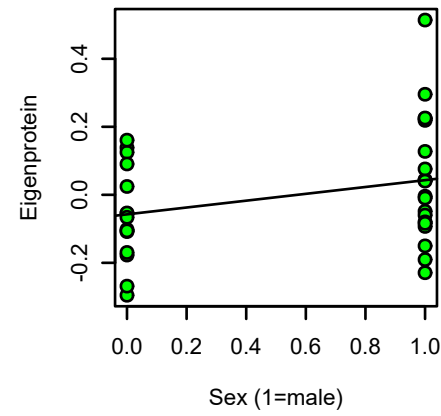

**bicor=0.43, p=0.075**  
**cor=0.43, p=0.075**

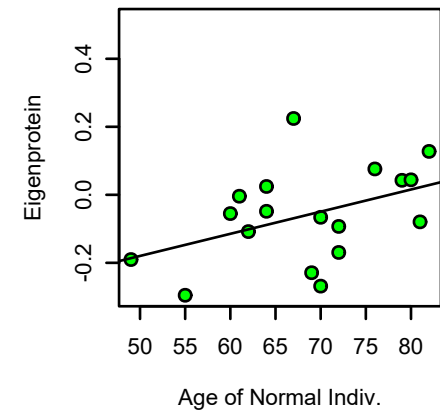

**bicor=0.46, p=0.062**  
**cor=0.55, p=0.022**

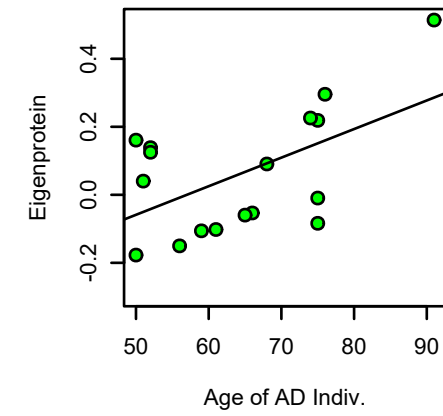

**bicor=-0.56, p=0.00043**  
**cor=-0.54, p=0.00081**

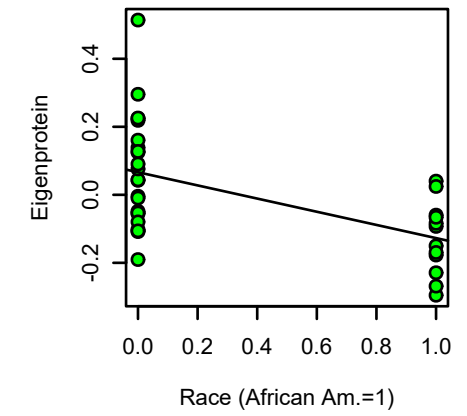

**bicor=0.038, p=0.83**  
**cor=0.075, p=0.67**

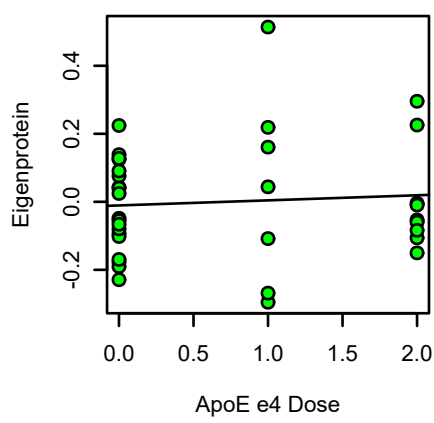

**bicor=-0.35, p=0.055**  
**cor=-0.069, p=0.71**

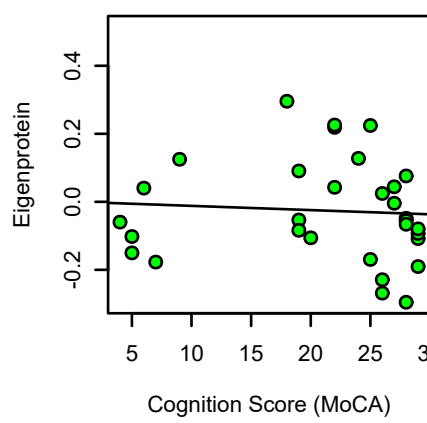

**bicor=0.37, p=0.027**  
**cor=0.41, p=0.014**

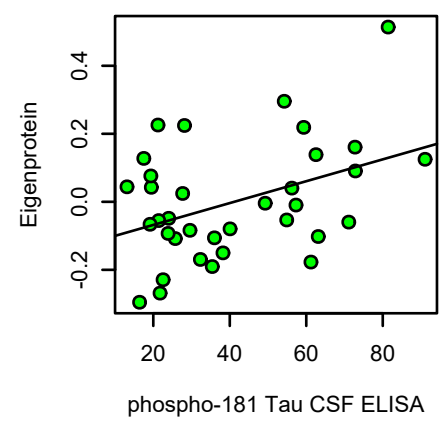

**bicor=0.55, p=7e-04**  
**cor=0.5, p=0.0022**

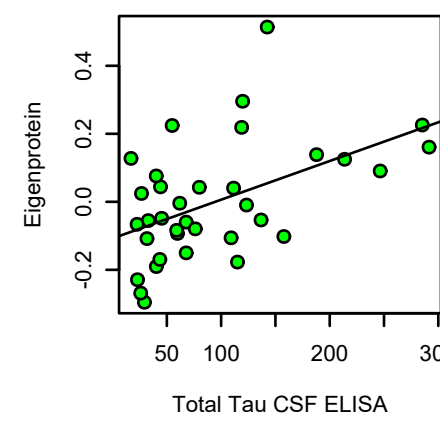

**bicor=-0.25, p=0.14**  
**cor=-0.24, p=0.16**

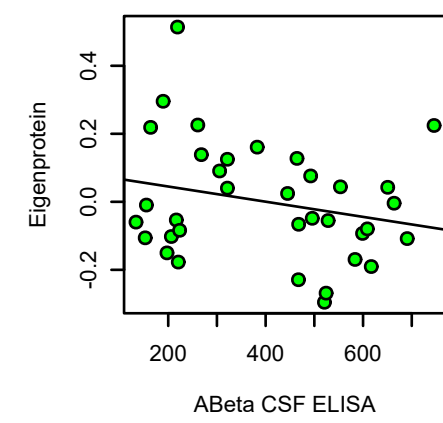

**bicor=-0.36, p=0.036**  
**cor=-0.38, p=0.024**

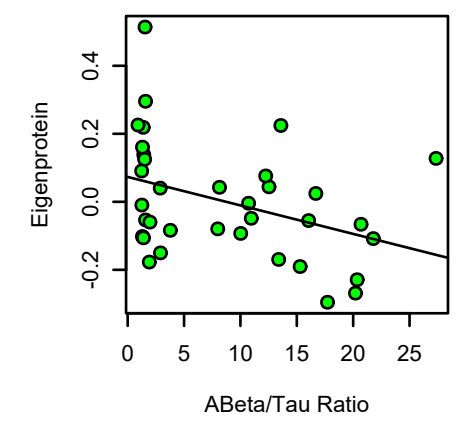

**M18 lightgreen**  
Age+Sex-disc.  $p = 0.025$   
Sex-discounted  $p = 0.018$

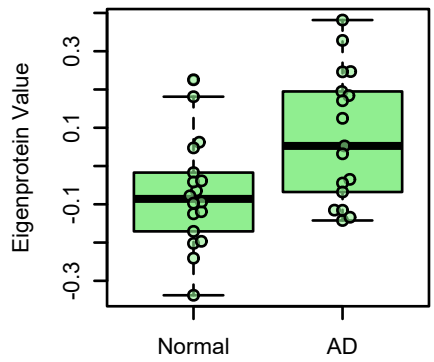

**M18 lightgreen**  
Cellular Adhesion/ECM Organizati  
ANOVA  $p = 0.051$

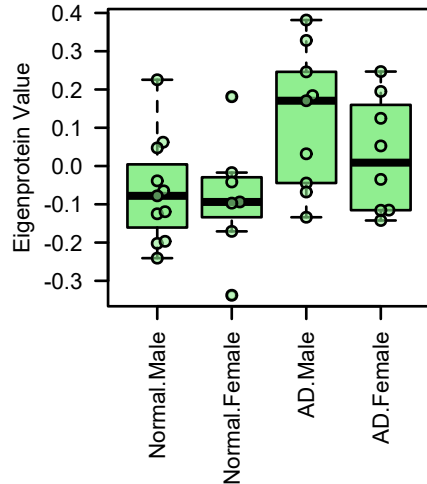

**bicor=0.09, p=0.61**  
**cor=0.12, p=0.49**

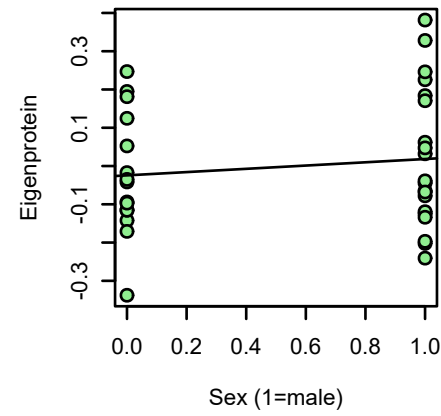

**bicor=0.11, p=0.68**  
**cor=0.14, p=0.58**

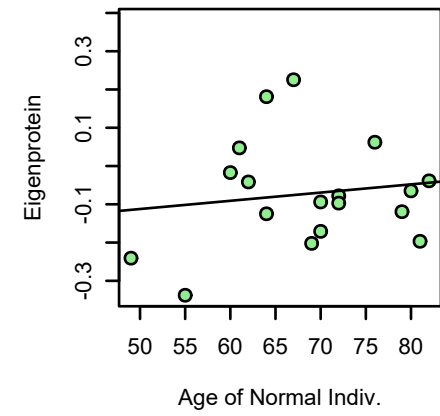

**bicor=0.31, p=0.23**  
**cor=0.35, p=0.17**

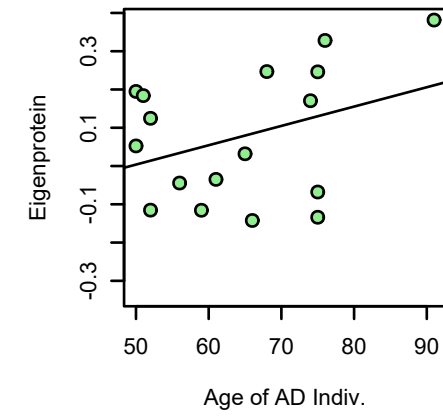

**bicor=-0.22, p=0.2**  
**cor=-0.25, p=0.15**

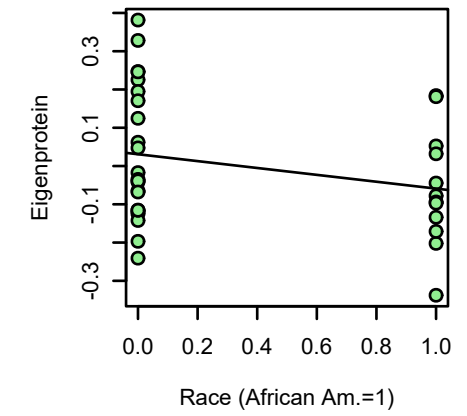

**bicor=0.051, p=0.77**  
**cor=0.071, p=0.69**

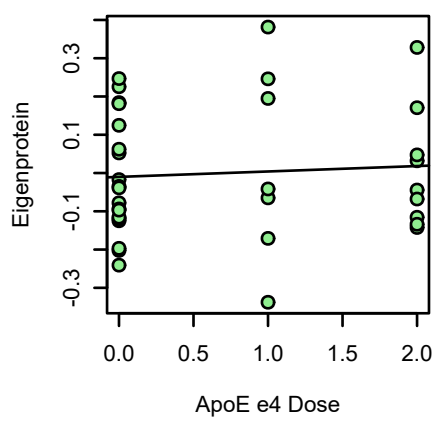

**bicor=-0.37, p=0.042**  
**cor=-0.26, p=0.16**

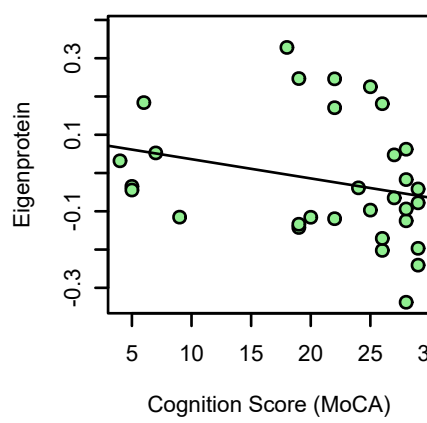

**bicor=0.47, p=0.004**  
**cor=0.46, p=0.0054**

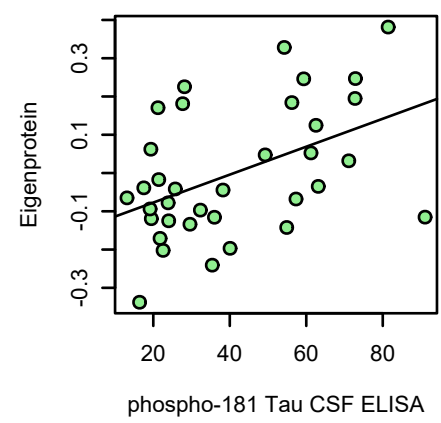

**bicor=0.5, p=0.0024**  
**cor=0.47, p=0.0044**

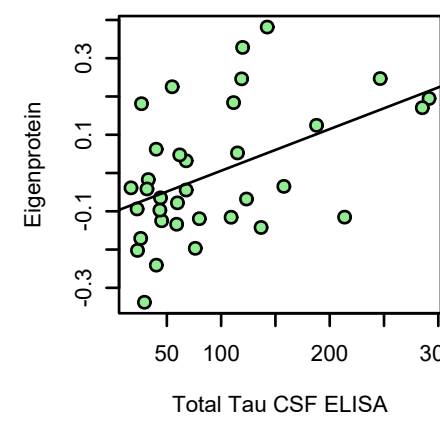

**bicor=-0.34, p=0.043**  
**cor=-0.32, p=0.061**

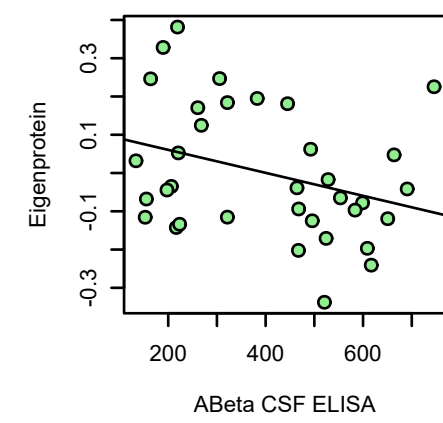

**bicor=-0.39, p=0.02**  
**cor=-0.42, p=0.012**

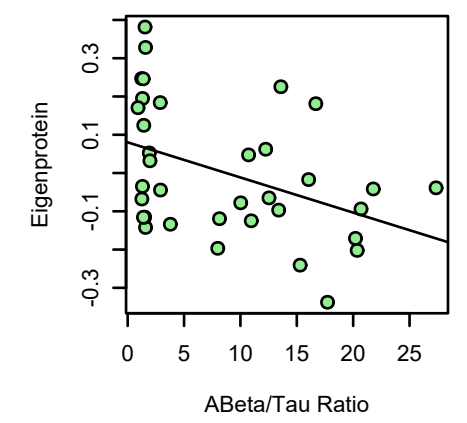

**M34 darkmagenta**  
Age+Sex-disc.  $p = 0.11$   
Sex-discounted  $p = 0.54$

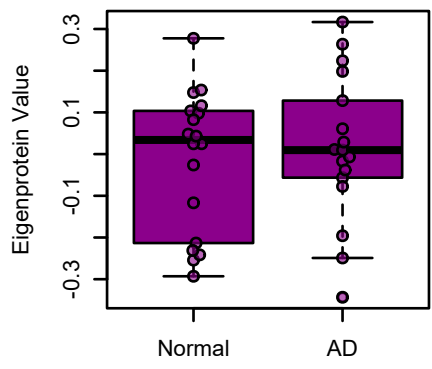

**M34 darkmagenta**  
Carbohydrate Binding  
ANOVA  $p = 0.19$

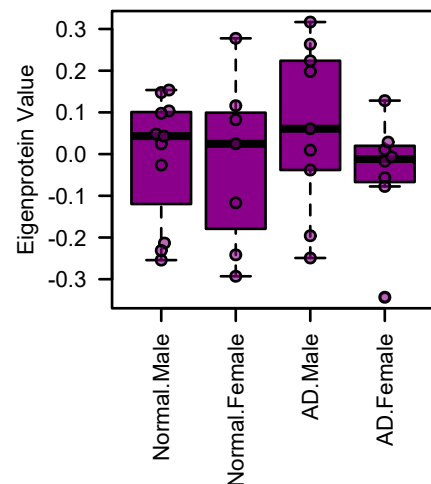

**bicor=0.16, p=0.36**  
**cor=0.17, p=0.33**

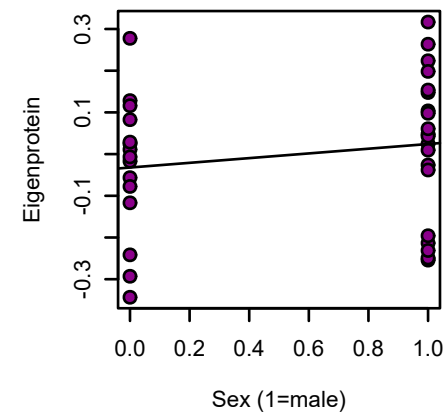

**bicor=0.21, p=0.39**  
**cor=0.24, p=0.34**

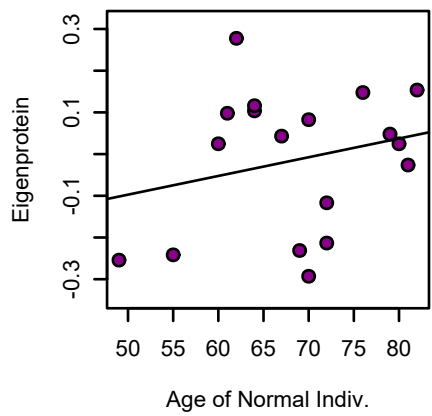

**bicor=0.5, p=0.039**  
**cor=0.54, p=0.025**

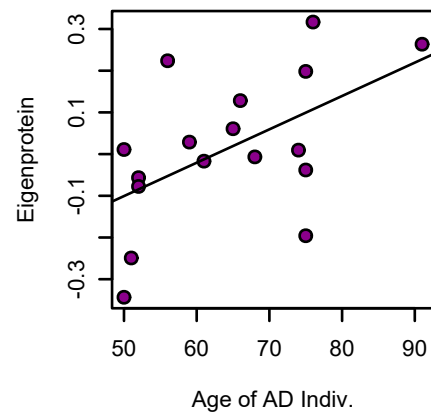

**bicor=-0.48, p=0.0038**  
**cor=-0.5, p=0.0022**

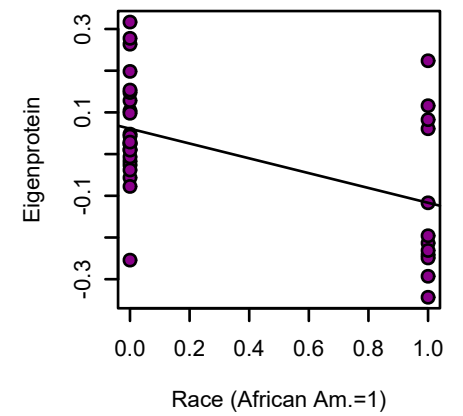

**bicor=0.36, p=0.031**  
**cor=0.37, p=0.029**

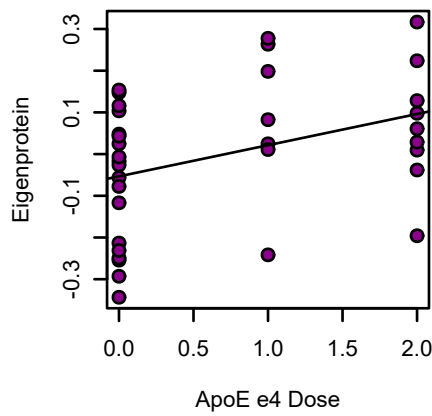

**bicor=-0.037, p=0.84**  
**cor=0.041, p=0.83**

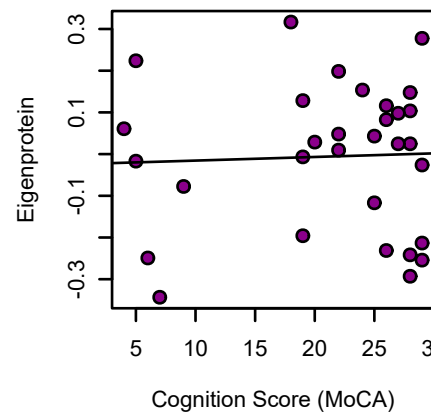

**bicor=0.053, p=0.76**  
**cor=0.091, p=0.6**

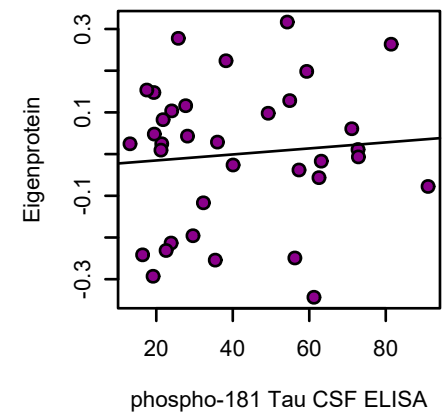

**bicor=0.017, p=0.92**  
**cor=0.051, p=0.77**

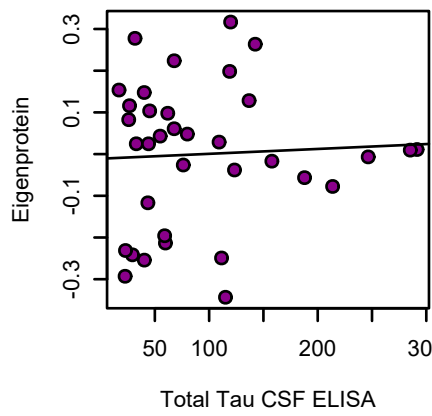

**bicor=-0.075, p=0.67**  
**cor=-0.1, p=0.57**

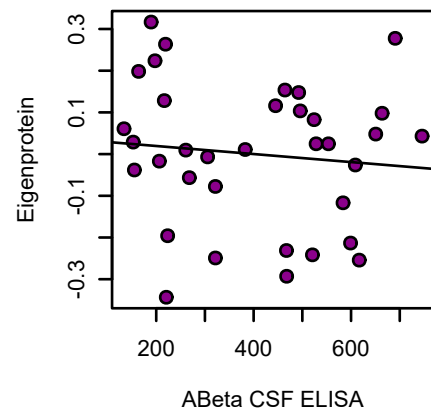

**bicor=-0.084, p=0.63**  
**cor=-0.077, p=0.66**

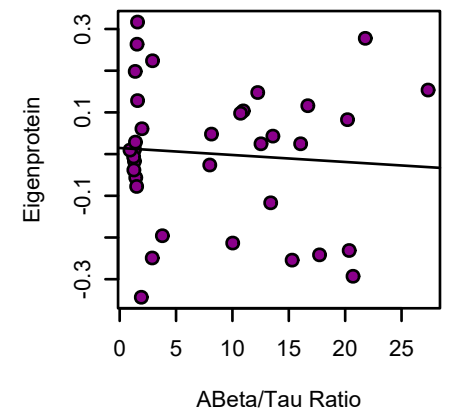

**M7 black**  
Age+Sex-disc.  $p = 0.0012$   
Sex-discounted  $p = 0.18$

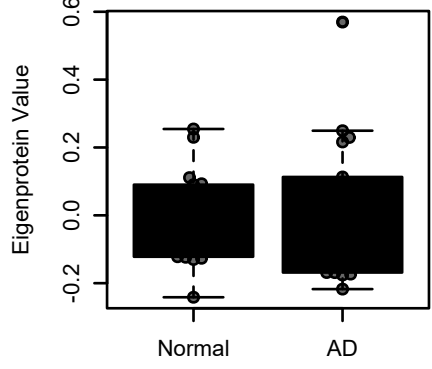

**M7 black**  
TNF/Ephrin Signaling  
ANOVA  $p = 0.0023$

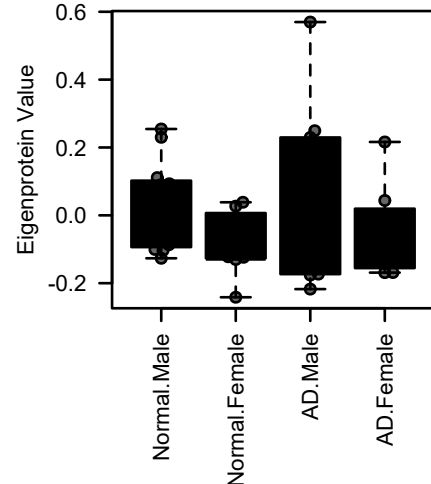

**bicor=0.3, p=0.082**  
**cor=0.3, p=0.08**

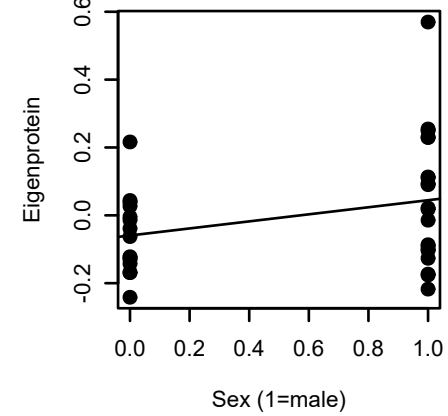

**bicor=0.62, p=0.0065**  
**cor=0.63, p=0.0051**

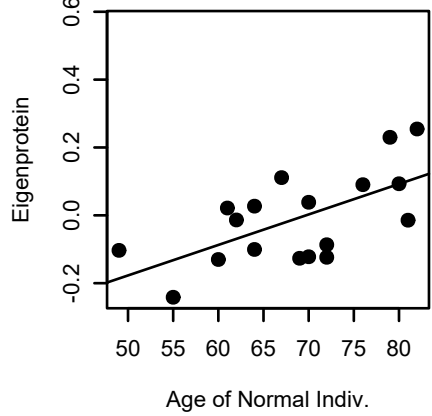

**bicor=0.53, p=0.028**  
**cor=0.63, p=0.0067**

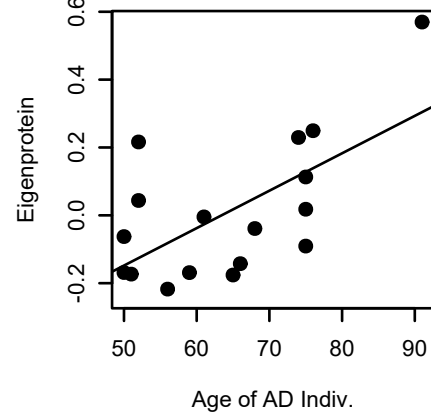

**bicor=-0.56, p=0.00043**  
**cor=-0.52, p=0.0014**

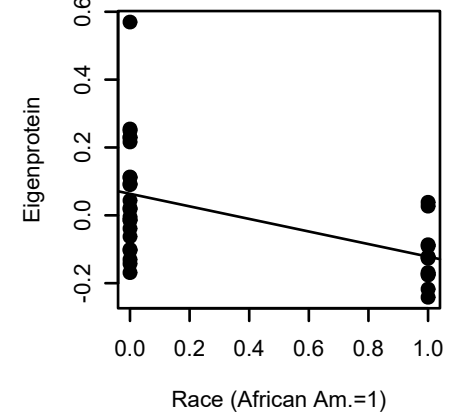

**bicor=-0.051, p=0.77**  
**cor=-0.024, p=0.89**

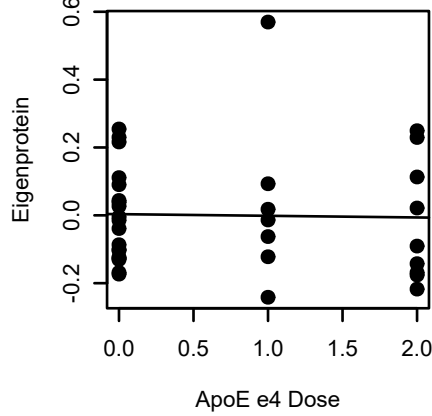

**bicor=-0.077, p=0.68**  
**cor=0.16, p=0.39**

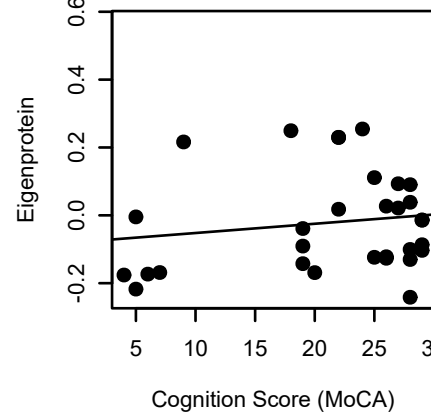

**bicor=0.053, p=0.76**  
**cor=0.17, p=0.33**

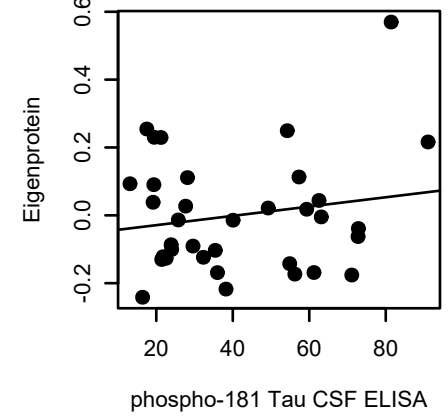

**bicor=0.25, p=0.15**  
**cor=0.25, p=0.15**

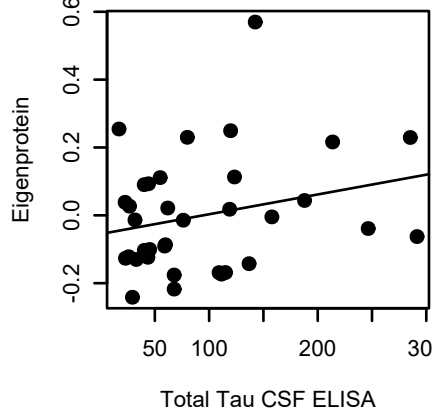

**bicor=0.034, p=0.85**  
**cor=-0.02, p=0.91**

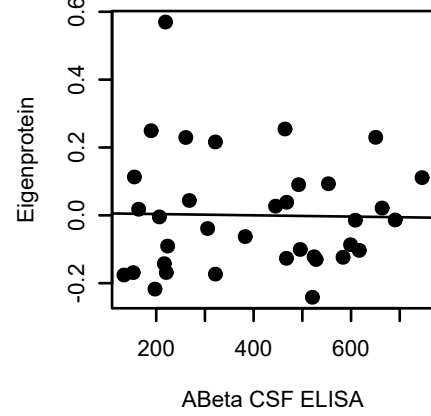

**bicor=-0.053, p=0.76**  
**cor=-0.08, p=0.65**

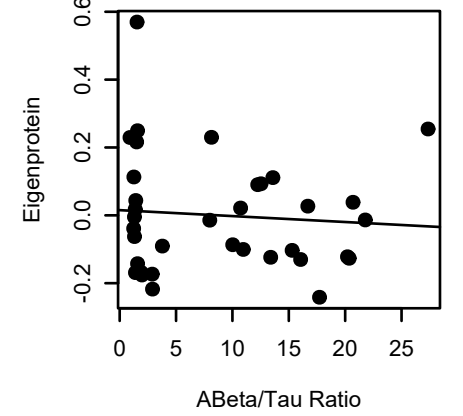

**M23 darkturquoise**  
Age+Sex-disc.  $p = 0.0011$   
Sex-discounted  $p = 0.023$

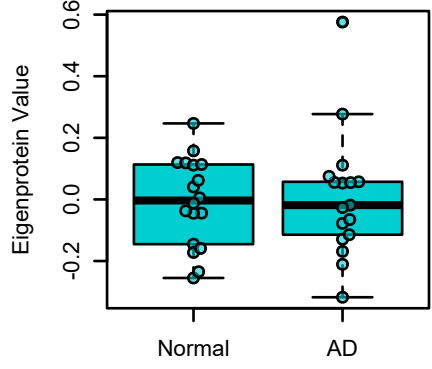

**M23 darkturquoise**  
Carbohydrate Binding/ECM  
ANOVA  $p = 0.003$

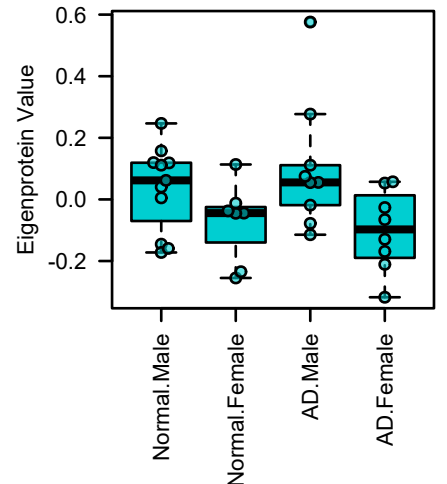

**bicor=0.47, p=0.0044**  
**cor=0.45, p=0.0067**

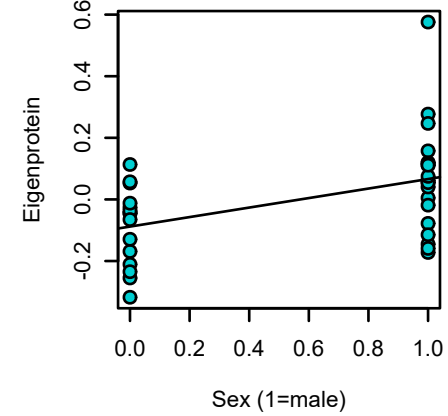

**bicor=0.5, p=0.033**  
**cor=0.52, p=0.027**

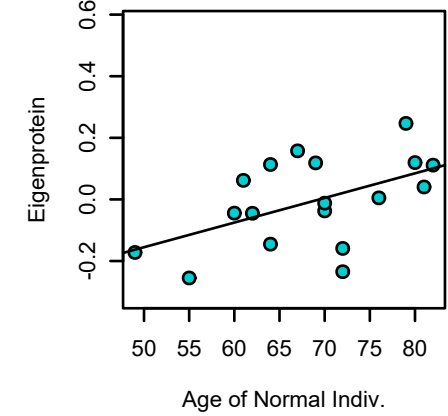

**bicor=0.48, p=0.05**  
**cor=0.65, p=0.0047**

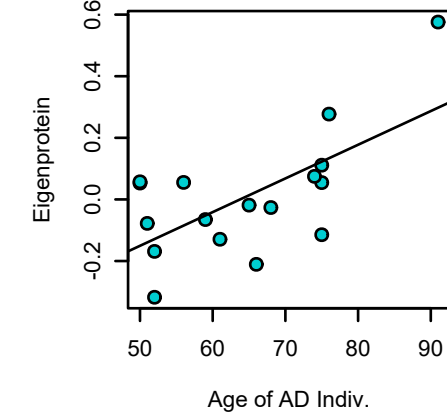

**bicor=-0.19, p=0.27**  
**cor=-0.2, p=0.25**

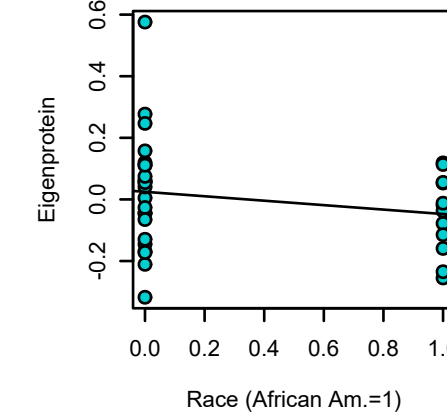

**bicor=0.16, p=0.34**  
**cor=0.16, p=0.36**

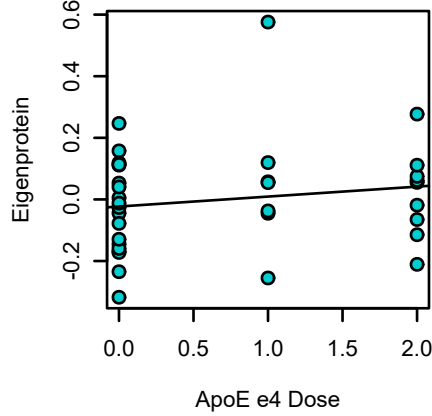

**bicor=-0.04, p=0.83**  
**cor=0.068, p=0.72**

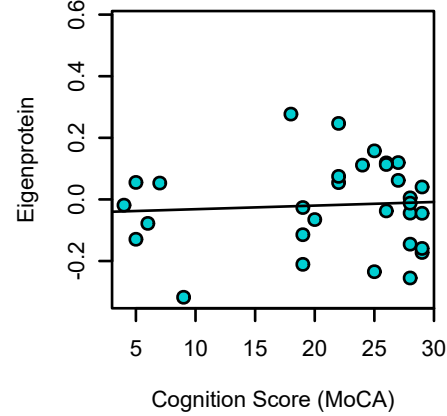

**bicor=-0.028, p=0.87**  
**cor=0.041, p=0.82**

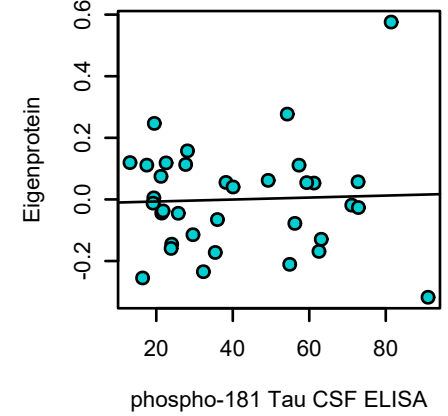

**bicor=-0.015, p=0.93**  
**cor=0.018, p=0.92**

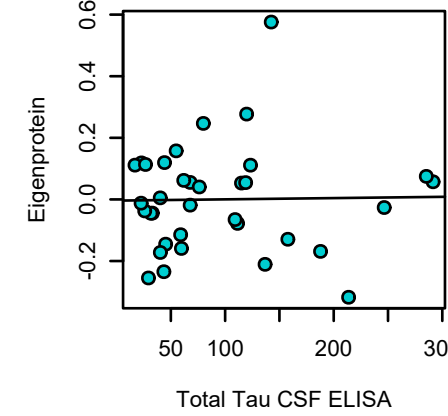

**bicor=-0.029, p=0.87**  
**cor=-0.069, p=0.69**

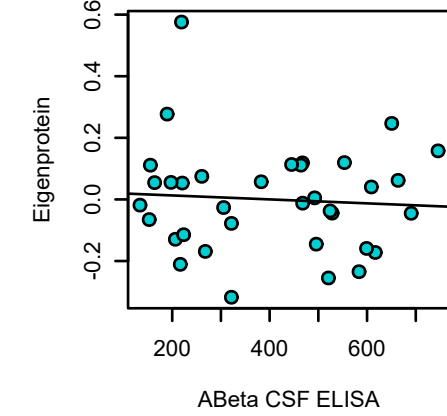

**bicor=-0.0087, p=0.96**  
**cor=-0.049, p=0.78**

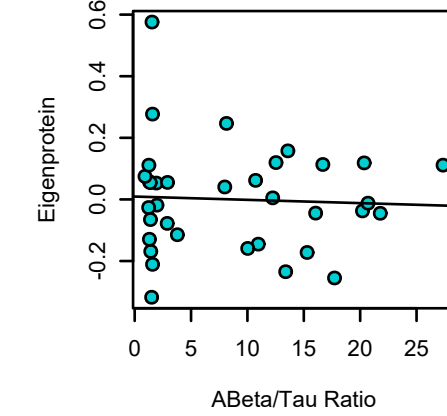

**M20 royalblue**  
Age+Sex-disc.  $p = 0.091$   
Sex-discounted  $p = 0.067$

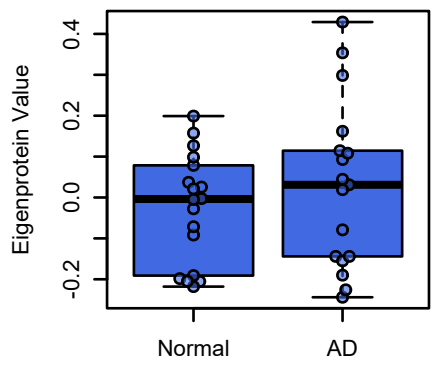

**M20 royalblue**  
Digestion  
ANOVA  $p = 0.073$

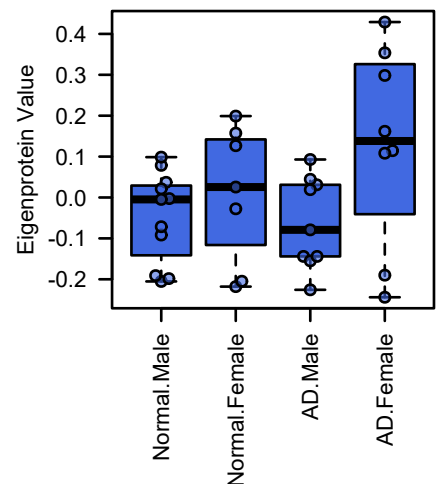

**bicor=-0.37, p=0.029**  
**cor=-0.37, p=0.029**

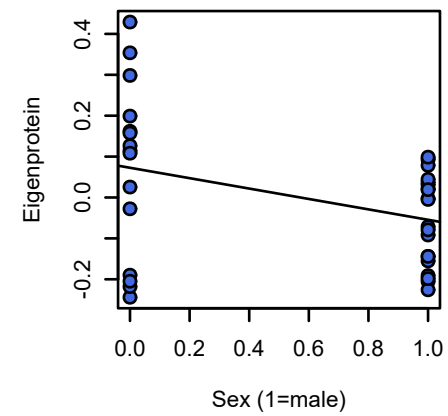

**bicor=-0.24, p=0.34**  
**cor=-0.26, p=0.3**

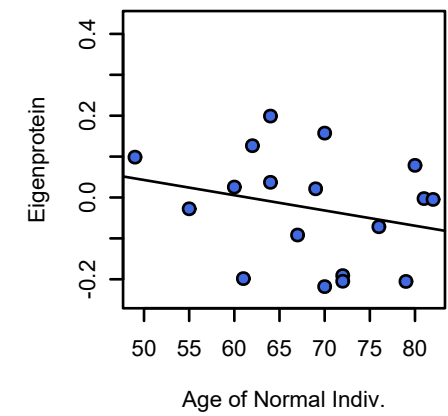

**bicor=0.12, p=0.63**  
**cor=0.11, p=0.67**

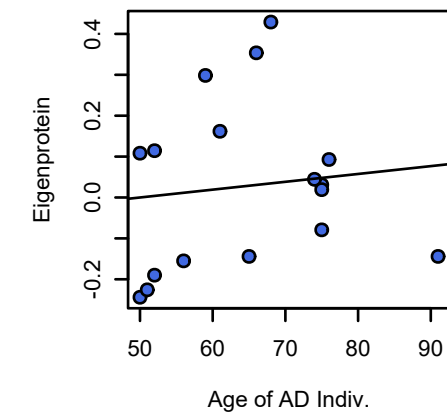

**bicor=-0.39, p=0.019**  
**cor=-0.4, p=0.017**

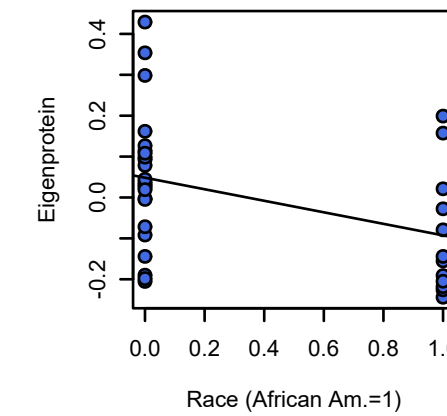

**bicor=0.077, p=0.66**  
**cor=0.084, p=0.63**

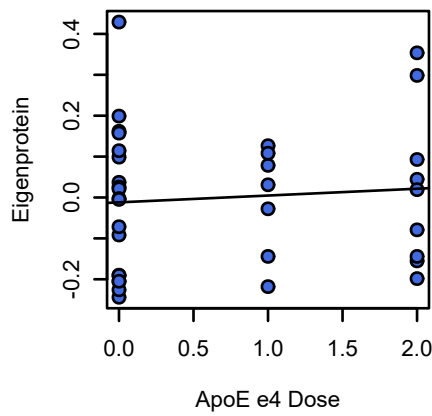

**bicor=-0.09, p=0.63**  
**cor=0.11, p=0.56**

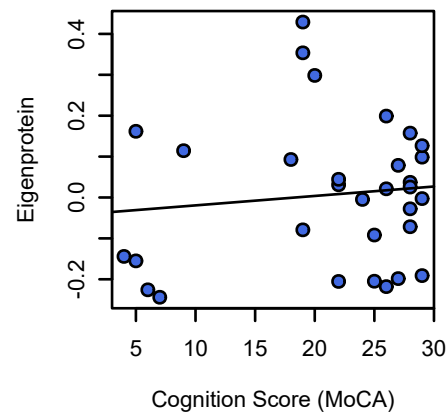

**bicor=0.04, p=0.82**  
**cor=0.1, p=0.57**

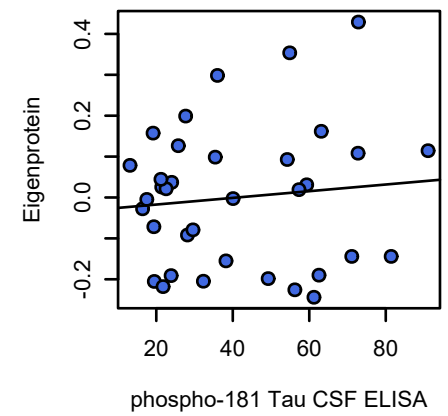

**bicor=0.16, p=0.35**  
**cor=0.28, p=0.1**

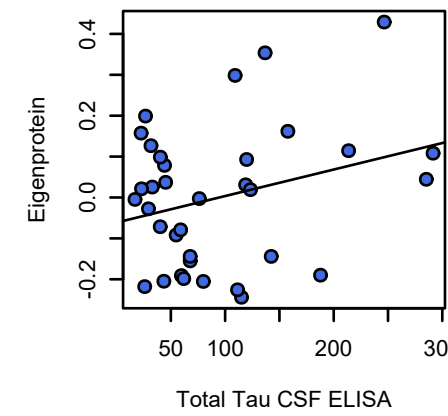

**bicor=-0.15, p=0.39**  
**cor=-0.2, p=0.25**

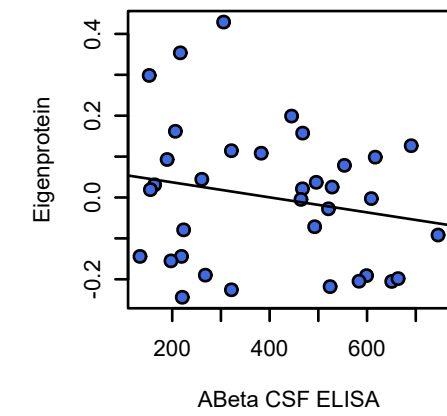

**bicor=-0.055, p=0.76**  
**cor=-0.063, p=0.72**

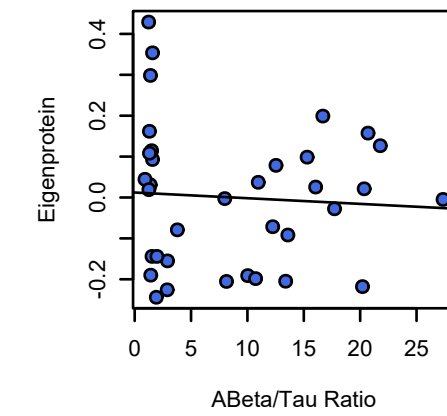

**M30 steelblue**  
Age+Sex-disc.  $p = 0.74$   
Sex-discounted  $p = 0.99$

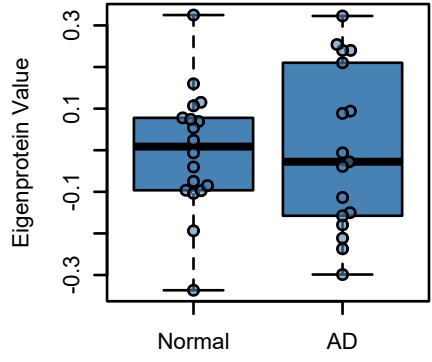

**M30 steelblue**  
Ambiguous  
ANOVA  $p = 0.83$

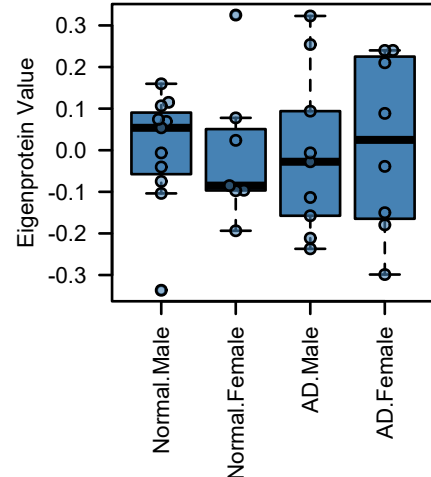

**bicor=-0.0095, p=0.96**  
**cor=-0.022, p=0.9**

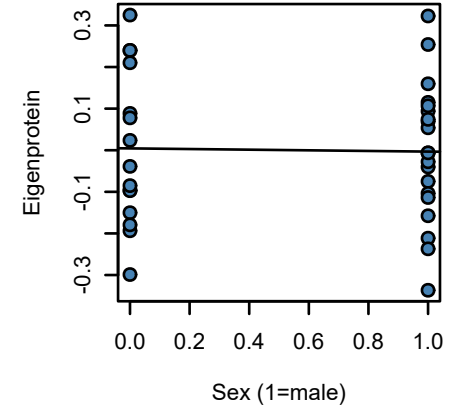

**bicor=0.26, p=0.31**  
**cor=0.22, p=0.38**

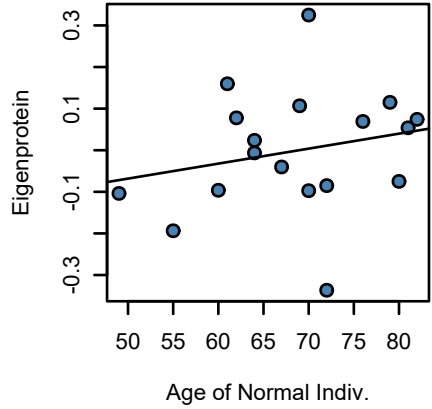

**bicor=0.11, p=0.68**  
**cor=0.12, p=0.65**

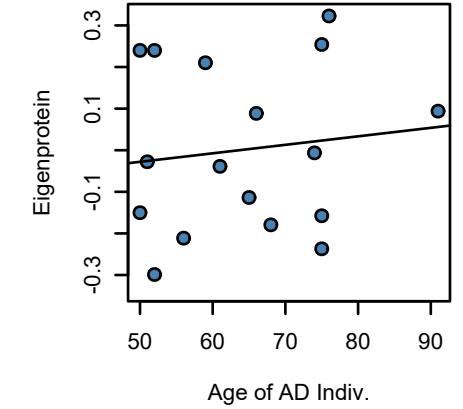

**bicor=-0.2, p=0.24**  
**cor=-0.19, p=0.27**

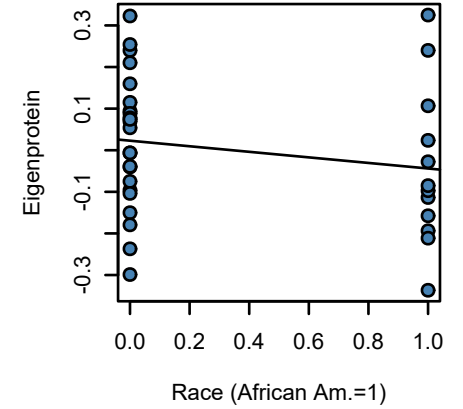

**bicor=0.088, p=0.62**  
**cor=0.1, p=0.57**

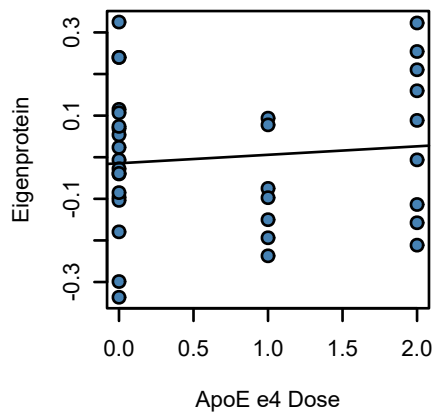

**bicor=-0.17, p=0.36**  
**cor=-0.051, p=0.79**

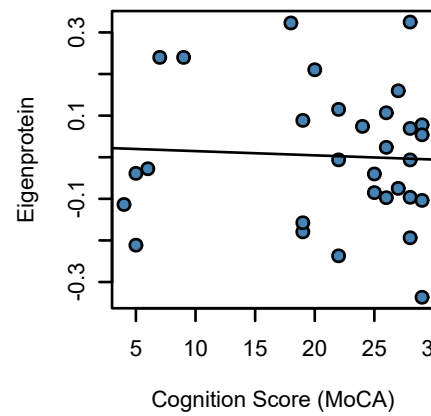

**bicor=0.06, p=0.73**  
**cor=0.072, p=0.68**

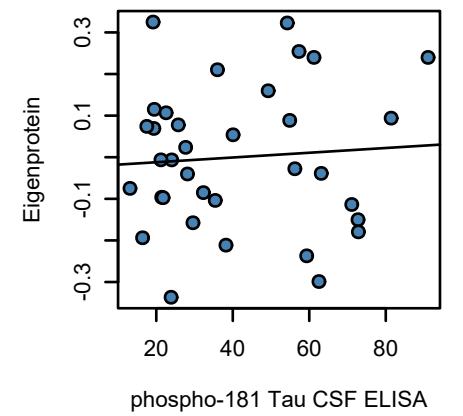

**bicor=0.034, p=0.85**  
**cor=-0.051, p=0.77**

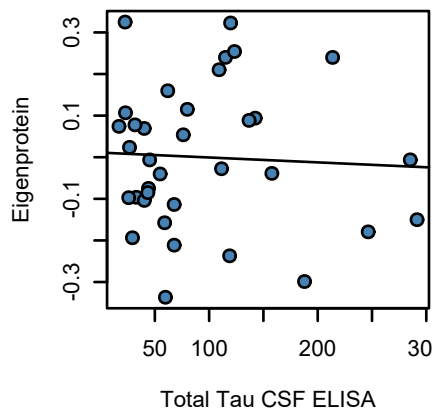

**bicor=-0.066, p=0.71**  
**cor=-0.077, p=0.66**

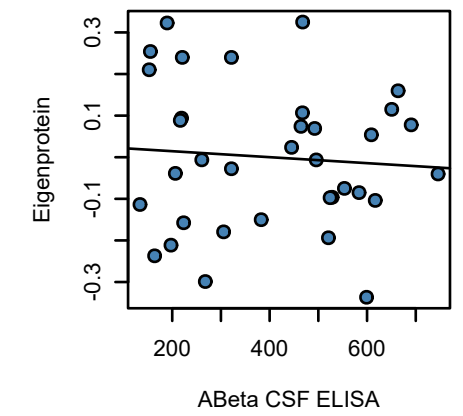

**bicor=0.033, p=0.85**  
**cor=0.04, p=0.82**

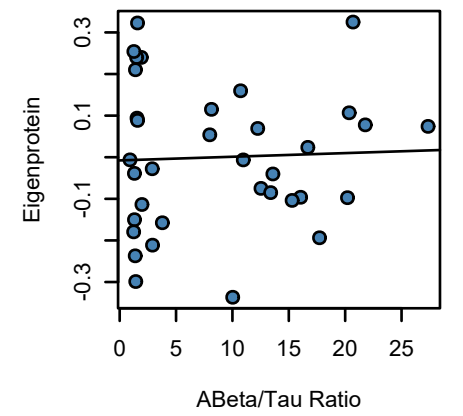

**M26 darkorange.Plasma35**  
Bicarbonate Transport/Peroxidase

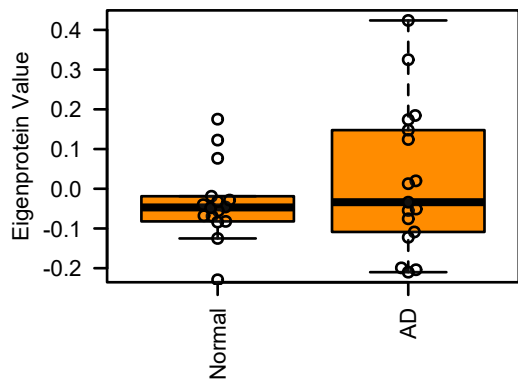

**MEdarkorange.Brain (Synthetic)**  
ANOVA p: 0.0028

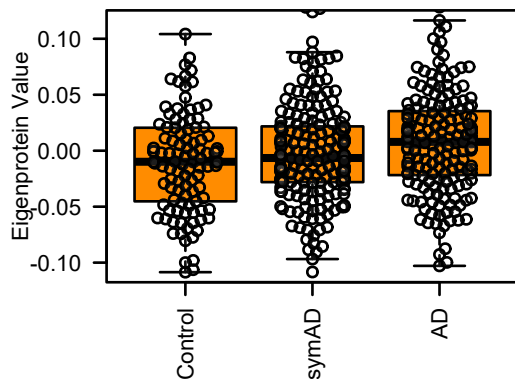

**MEdarkorange.Brain (Synthetic)**  
ANOVA p: 0.0068

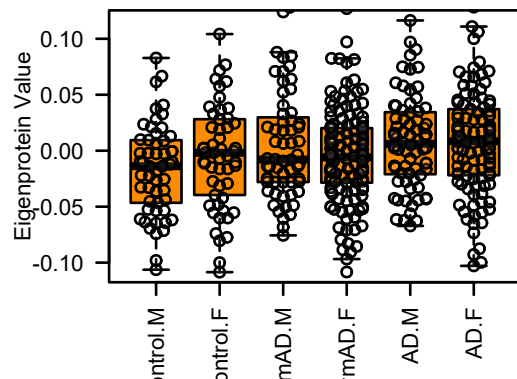

**Diagnosis.Sex**

**bicor=-0.11, p=0.018**  
**cor=-0.18, p=6.4e-05**

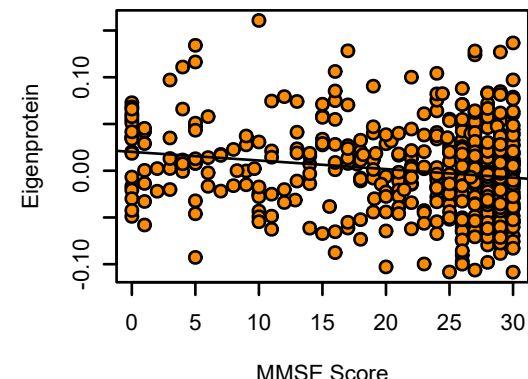

**M4 yellow.Plasma35**  
T Cell Regulation

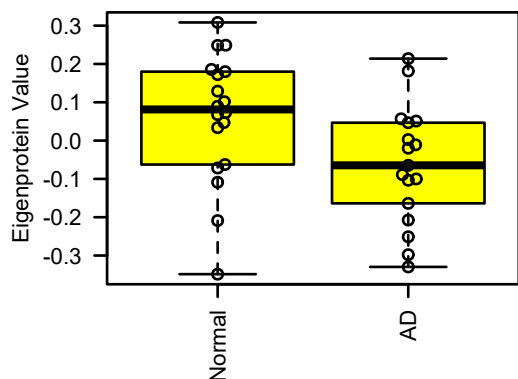

**MEyellow.Brain (Synthetic)**  
ANOVA p: 8.4e-09

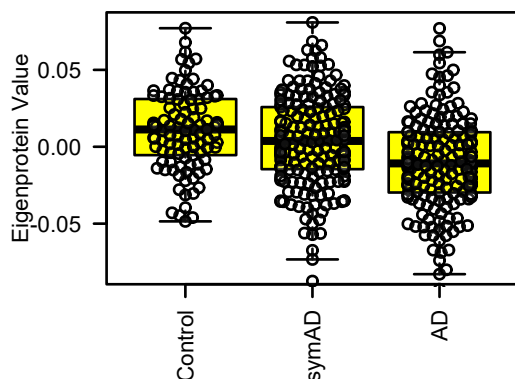

**MEyellow.Brain (Synthetic)**  
ANOVA p: 1.6e-07

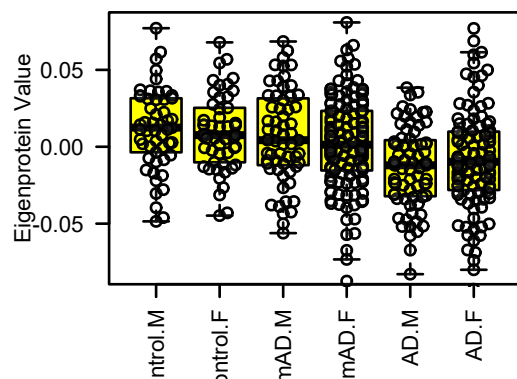

**Diagnosis.Sex**

**bicor=0.19, p=2.3e-05**  
**cor=0.28, p=3.1e-10**

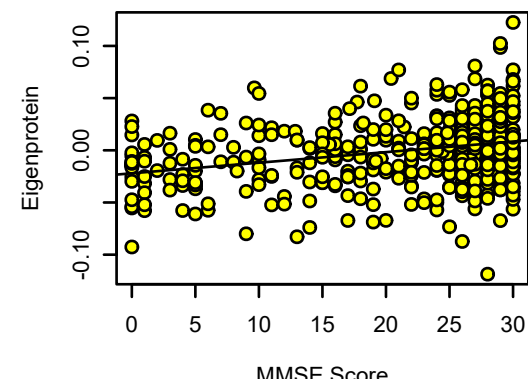

**M9 magenta.Plasma35**  
Leukocyte Chemotaxis

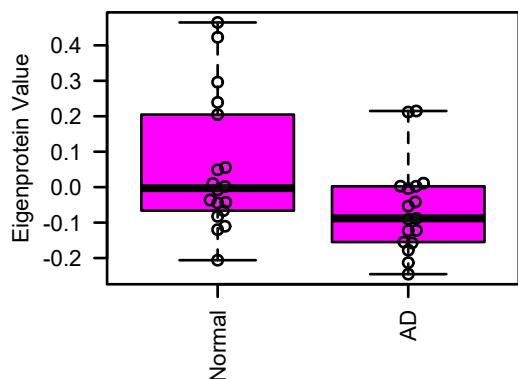

**MEmagenta.Brain (Synthetic)**  
ANOVA p: 0.00032

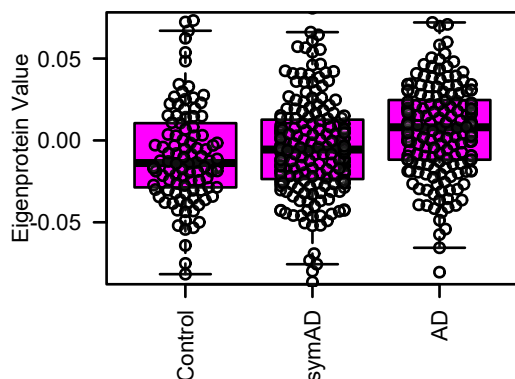

**MEmagenta.Brain (Synthetic)**  
ANOVA p: 0.0066

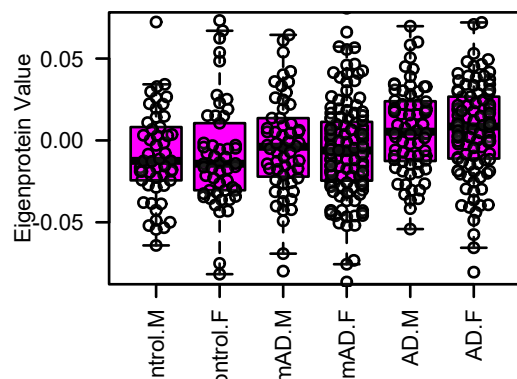

**Diagnosis.Sex**

**bicor=-0.18, p=6.9e-05**  
**cor=-0.21, p=2.9e-06**

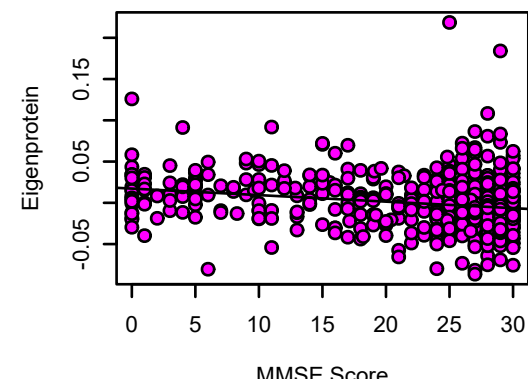

**M1 turquoise.Plasma35**  
Cellular Metabolism/Intracellular Transpor

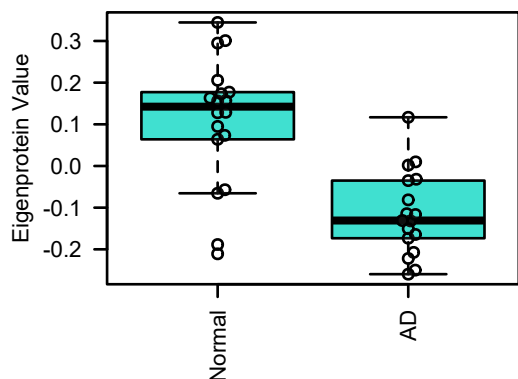

**MEturquoise.Brain (Synthetic)**  
ANOVA p: 8.6e-07

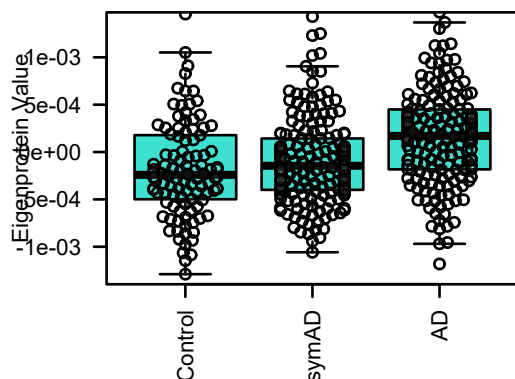

**MEturquoise.Brain (Synthetic)**  
ANOVA p: 3.8e-05

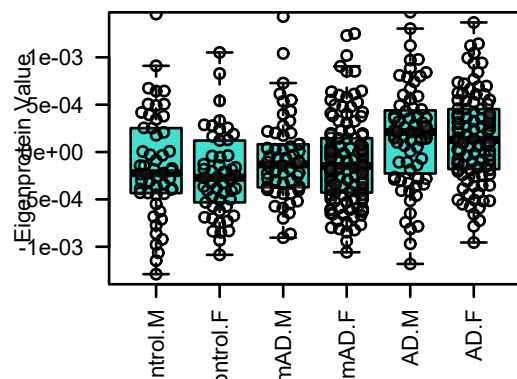

**Diagnosis.Sex**

**bicor=-0.23, p=2.9e-07**  
**cor=-0.25, p=2.2e-08**

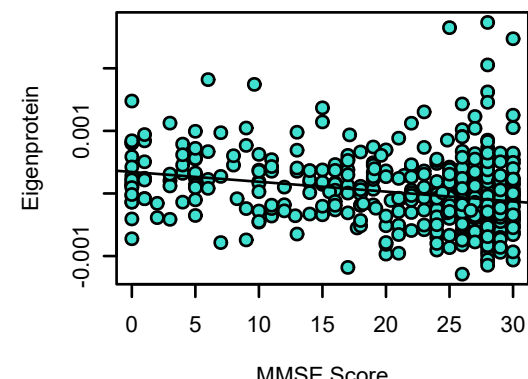

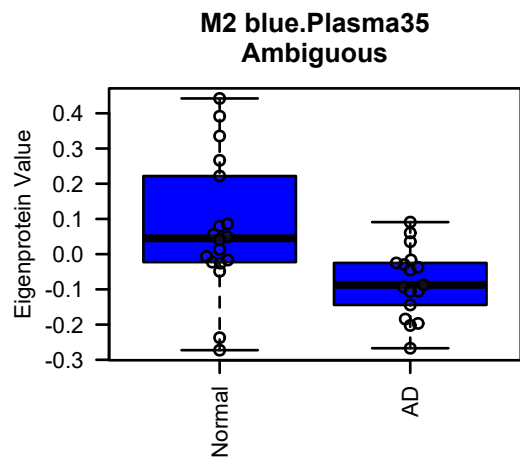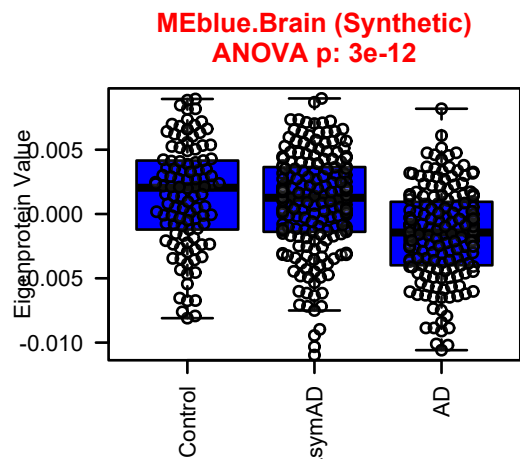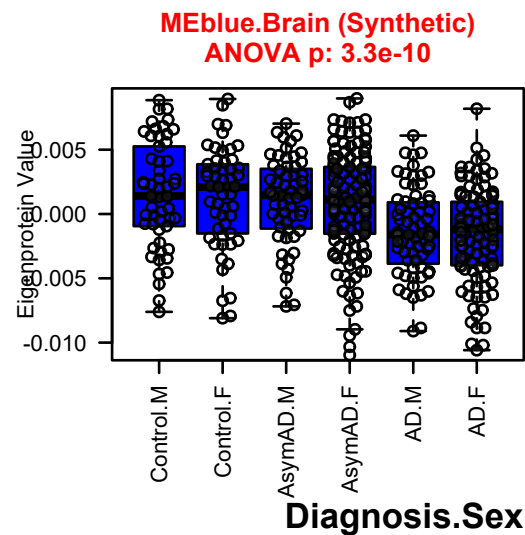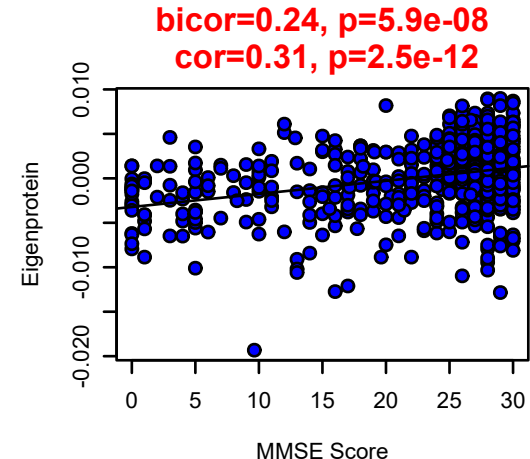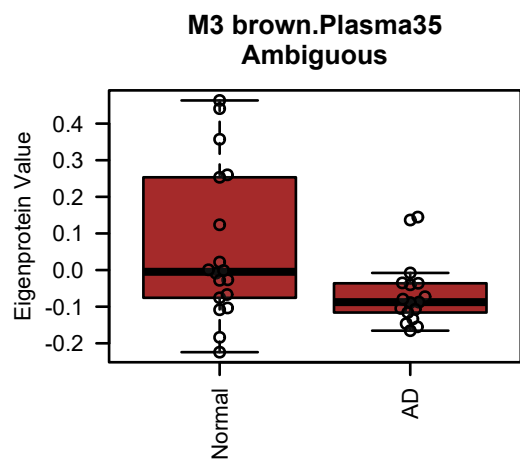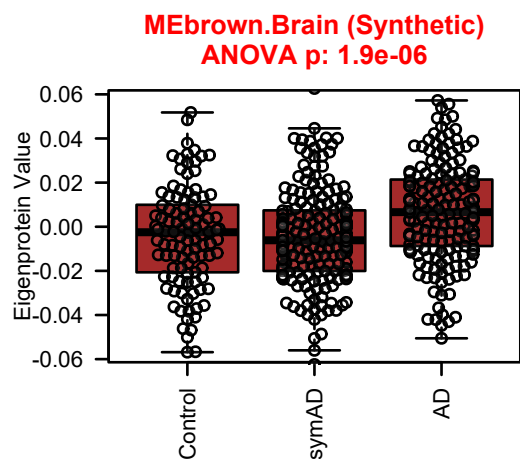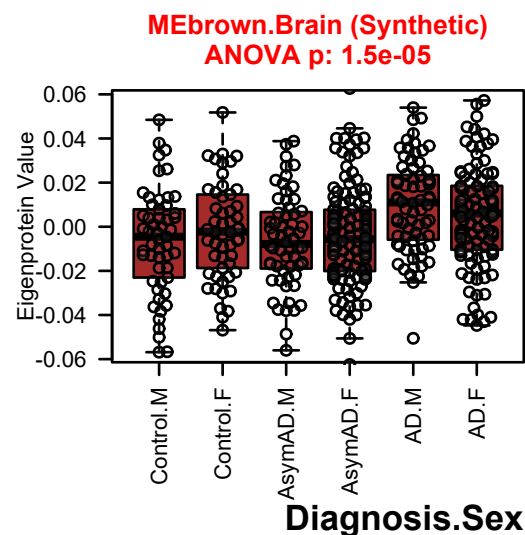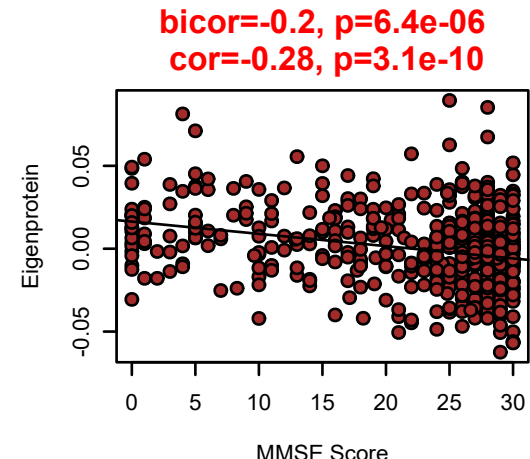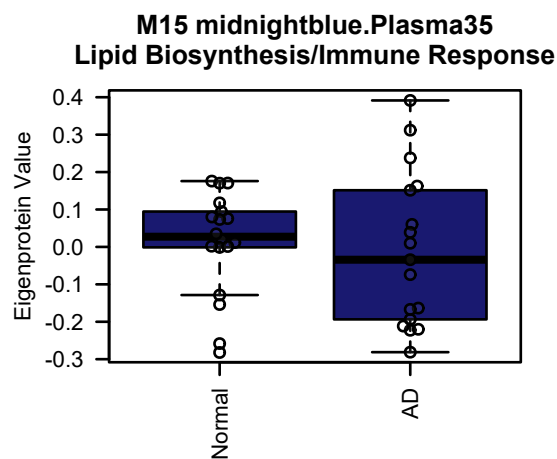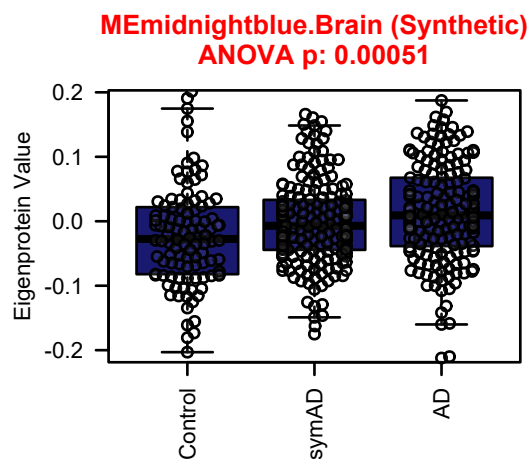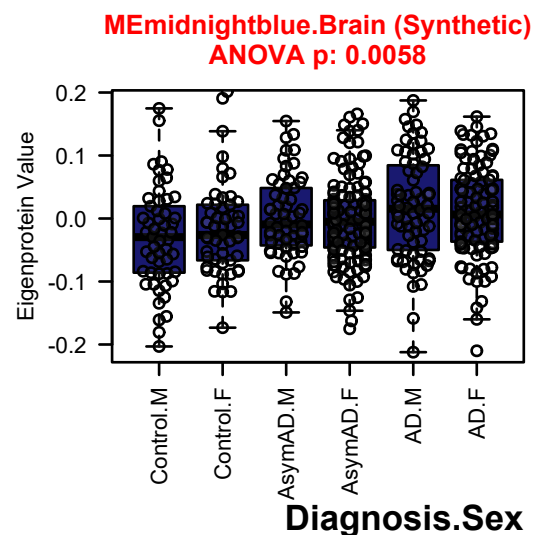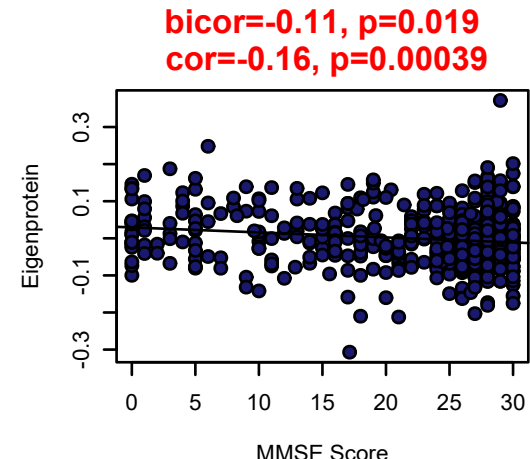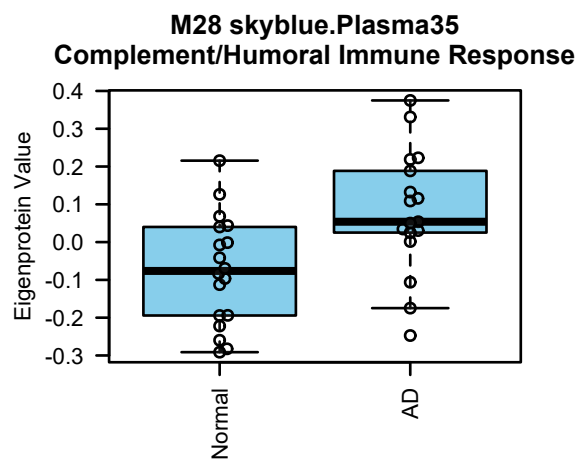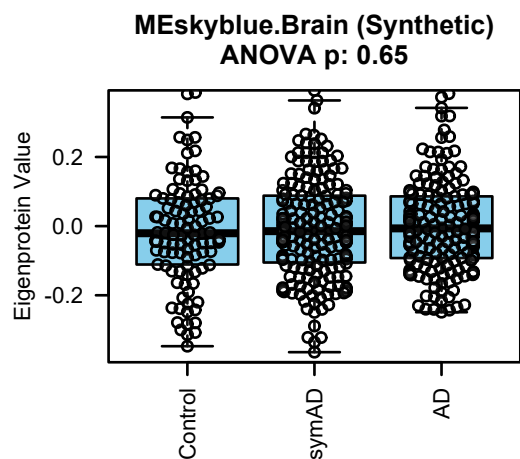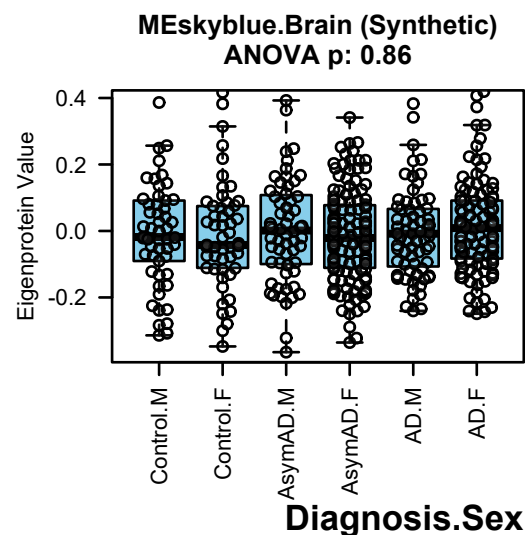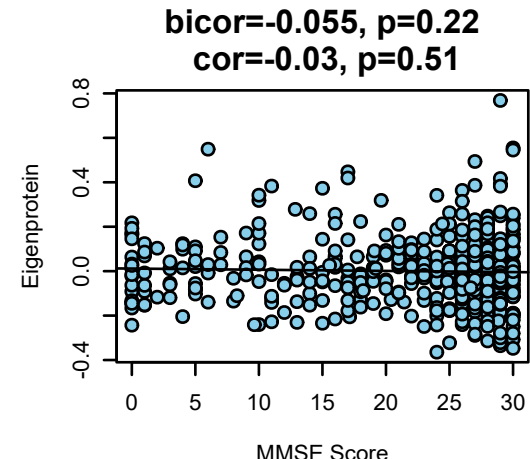

**M21 darkred.Plasma35**  
Metal Ion Homeostasis

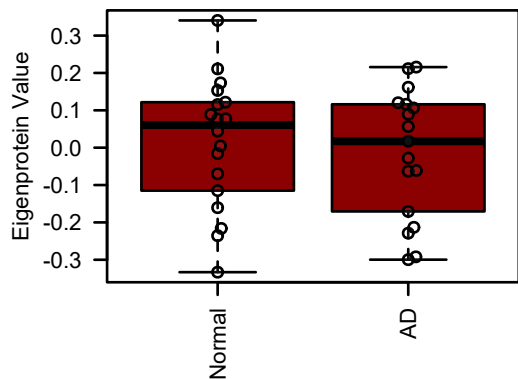

**MEdarkred.Brain (Synthetic)**  
ANOVA p: 0.097

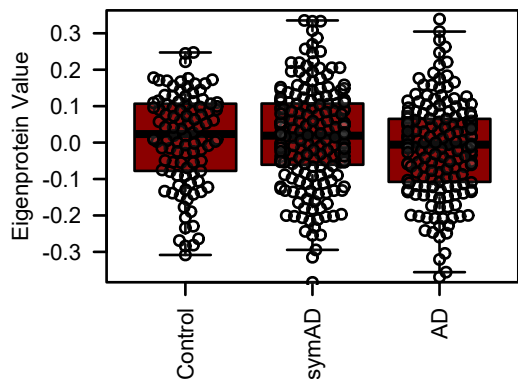

**MEdarkred.Brain (Synthetic)**  
ANOVA p: 0.37

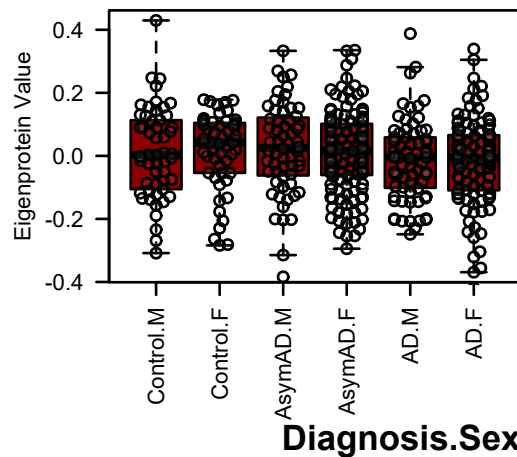

**bicor=0.09, p=0.047**  
**cor=0.11, p=0.015**

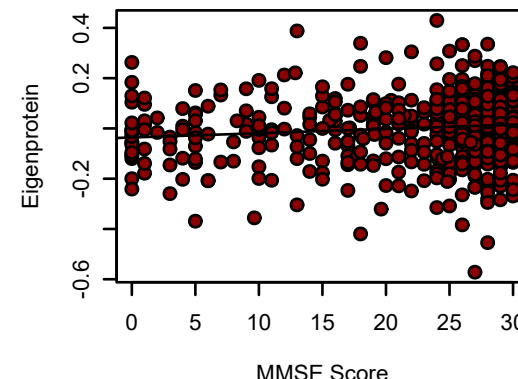

**M32 violet.Plasma35**  
Lipoprotein Metabolism

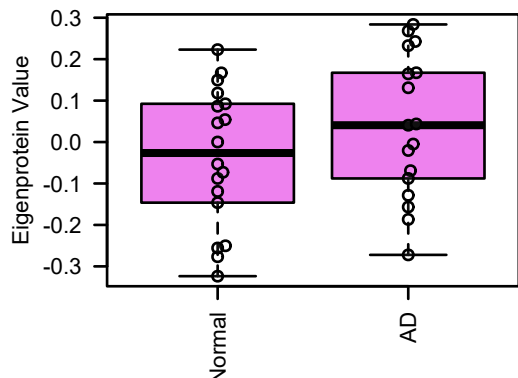

**MEviolet.Brain (Synthetic)**  
ANOVA p: 0.041

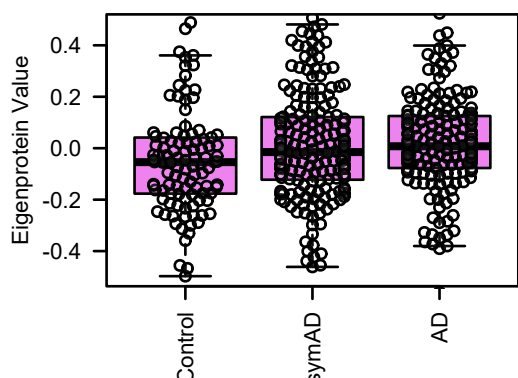

**MEviolet.Brain (Synthetic)**  
ANOVA p: 0.24

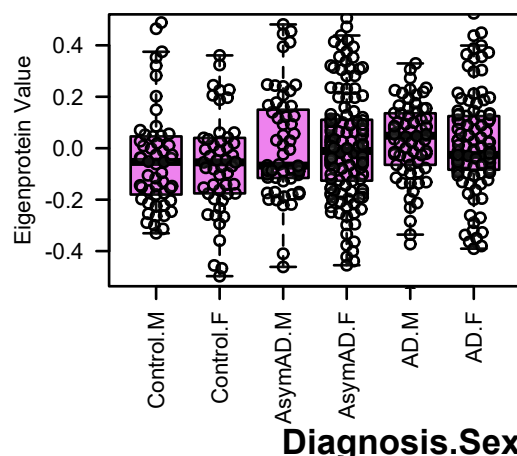

**bicor=-0.11, p=0.02**  
**cor=-0.099, p=0.029**

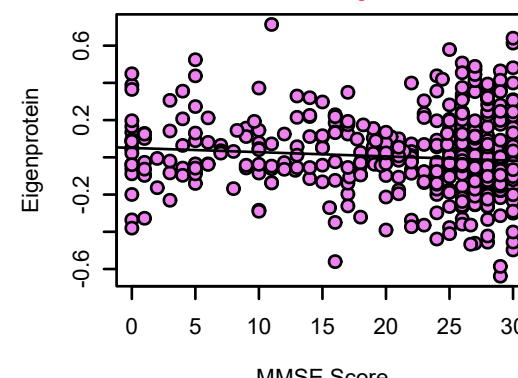

**M11 greenyellow.Plasma35**  
Immunoglobulins/Coagulation Cascade

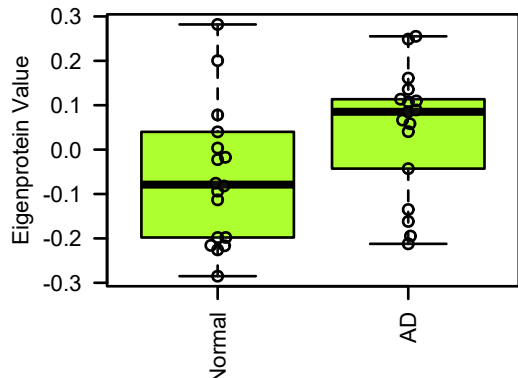

**MEgreenyellow.Brain (Synthetic)**  
ANOVA p: 0.056

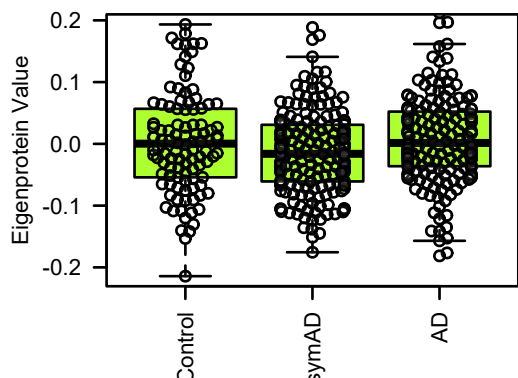

**MEgreenyellow.Brain (Synthetic)**  
ANOVA p: 0.27

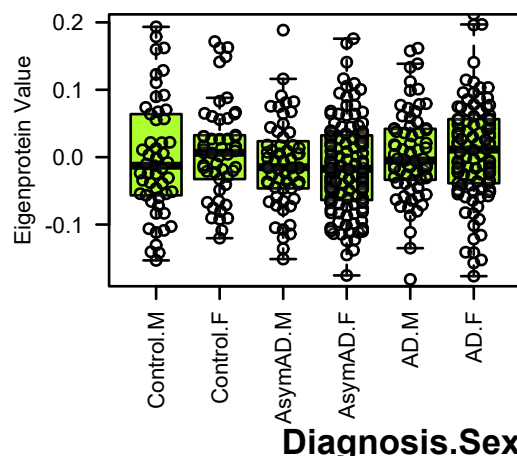

**bicor=-0.07, p=0.12**  
**cor=-0.1, p=0.027**

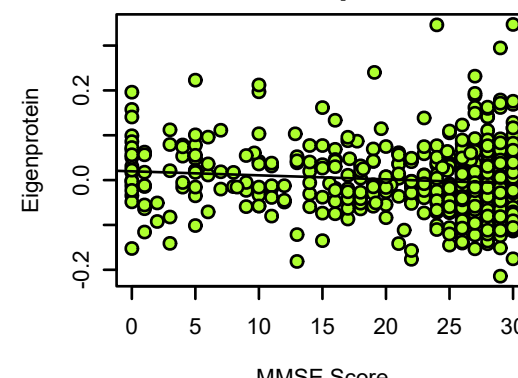

**M13 salmon.Plasma35**  
Ambiguous

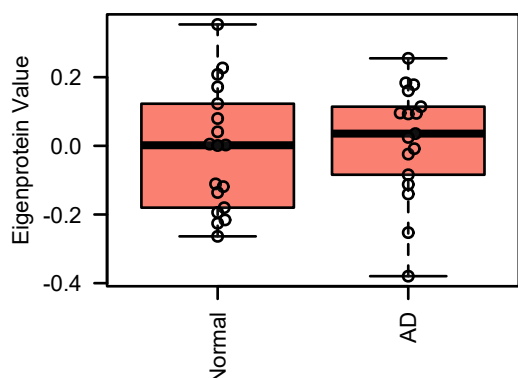

**MEsalmon.Brain (Synthetic)**  
ANOVA p: 1.7e-08

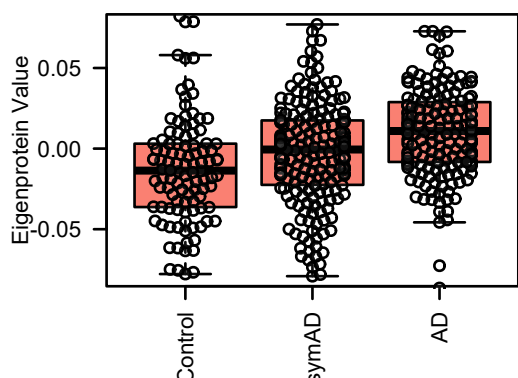

**MEsalmon.Brain (Synthetic)**  
ANOVA p: 1.3e-07

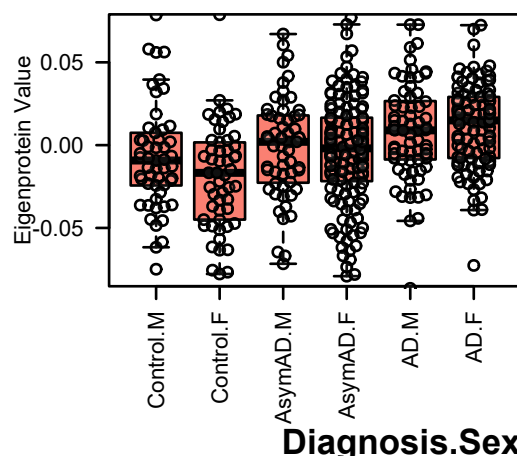

**bicor=-0.22, p=1.5e-06**  
**cor=-0.23, p=2.8e-07**

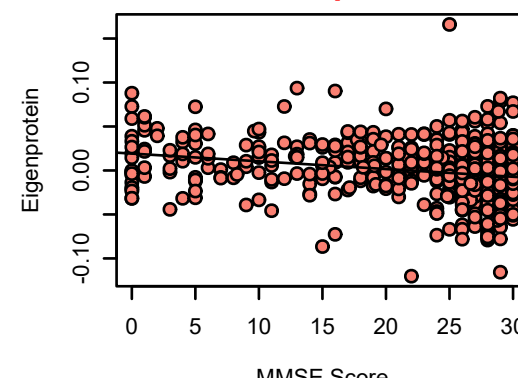



**M16 lightcyan.Plasma35**  
Complement/Protein Activation Cascade

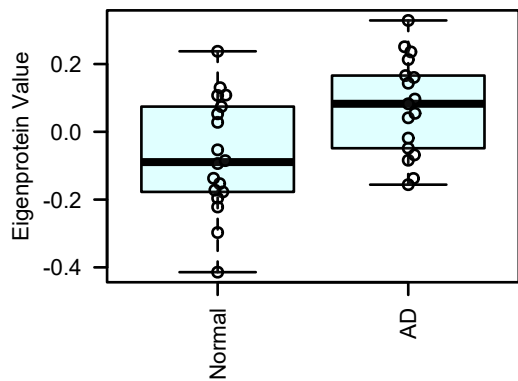

**MElightcyan.Brain (Synthetic)**  
ANOVA p: 0.045

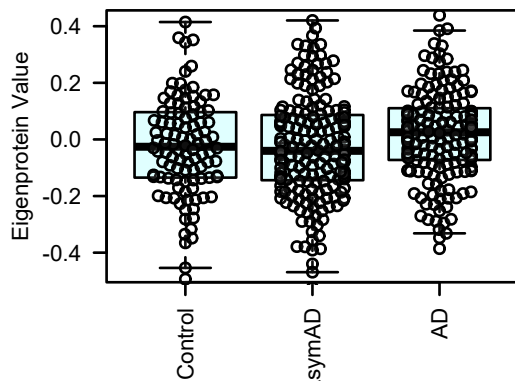

**MElightcyan.Brain (Synthetic)**  
ANOVA p: 0.15

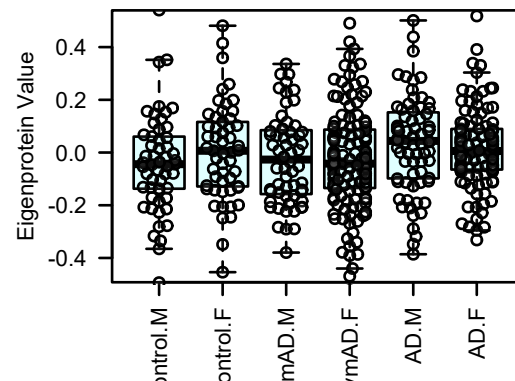

**Diagnosis.Sex**

**bicor=-0.074, p=0.1**  
**cor=-0.13, p=0.004**

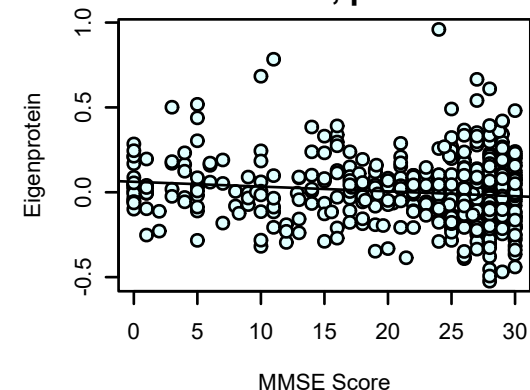

**M8 pink.Plasma35**  
Protein Activation Cascade

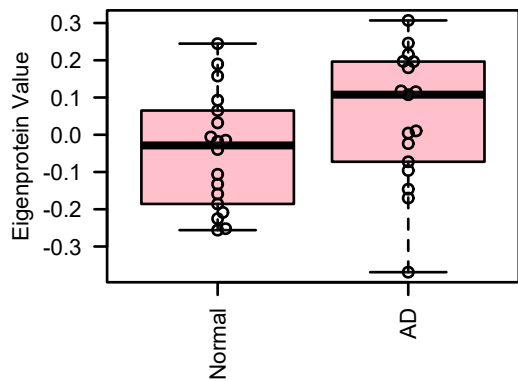

**MEpink.Brain (Synthetic)**  
ANOVA p: 0.019

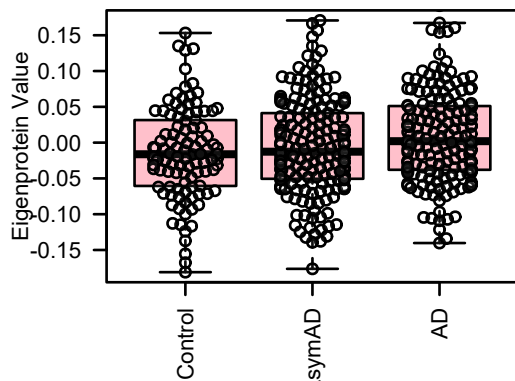

**MEpink.Brain (Synthetic)**  
ANOVA p: 0.091

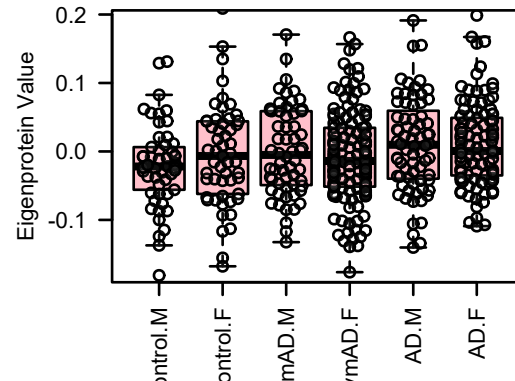

**Diagnosis.Sex**

**bicor=-0.1, p=0.025**  
**cor=-0.15, p=0.00089**

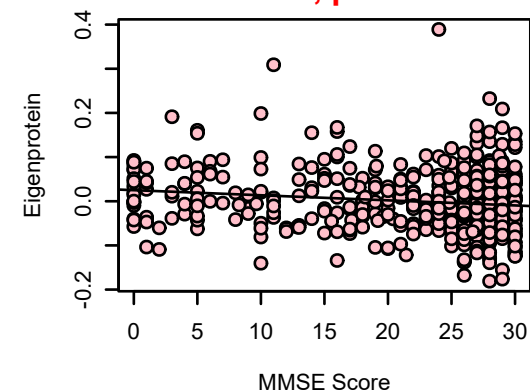

**M17 grey60.Plasma35**  
Glycosylation

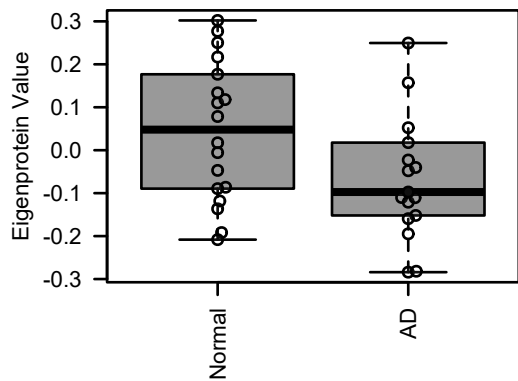

**MEgrey60.Brain (Synthetic)**  
ANOVA p: 0.26

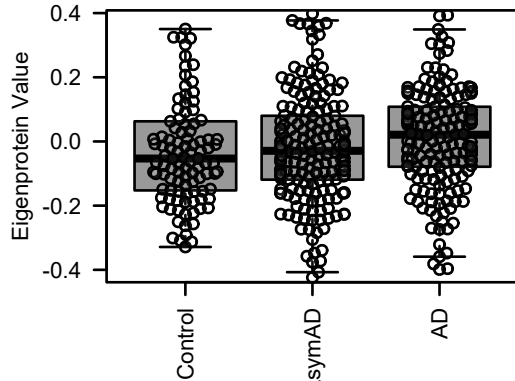

**MEgrey60.Brain (Synthetic)**  
ANOVA p: 0.61

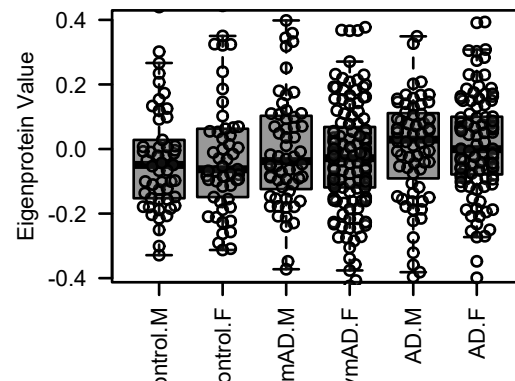

**Diagnosis.Sex**

**bicor=-0.11, p=0.017**  
**cor=-0.089, p=0.049**

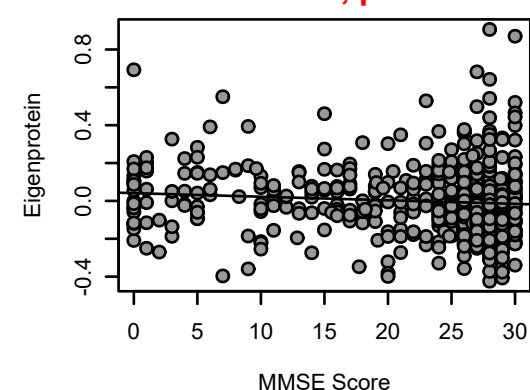

**M10 purple.Plasma35**  
Ambiguous

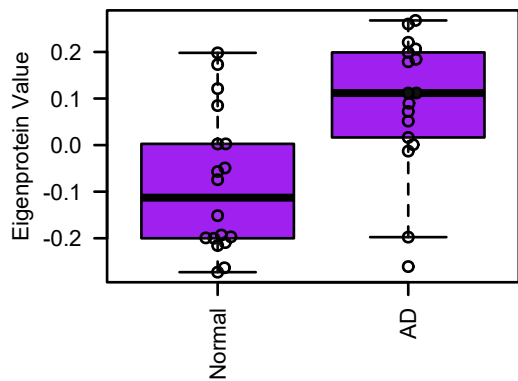

**MEpurple.Brain (Synthetic)**  
ANOVA p: 0.39

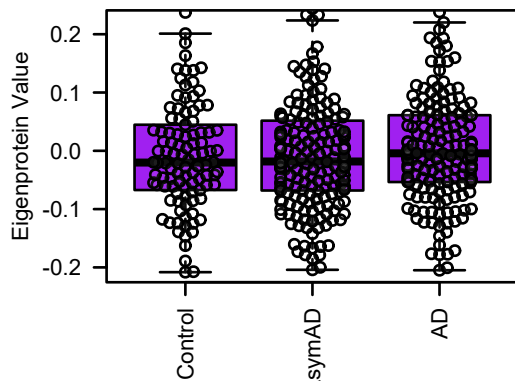

**MEpurple.Brain (Synthetic)**  
ANOVA p: 0.3

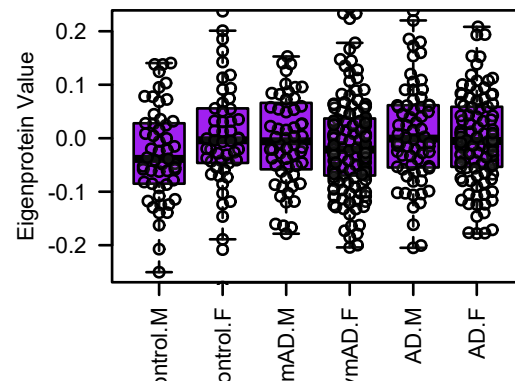

**Diagnosis.Sex**

**bicor=-0.063, p=0.16**  
**cor=-0.078, p=0.085**

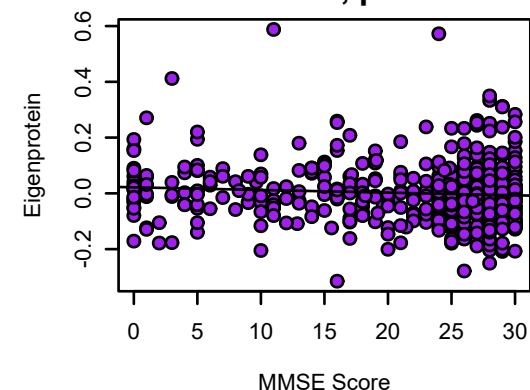

**M6 red.Plasma35**  
Axon Guidance/Nervous System Dev

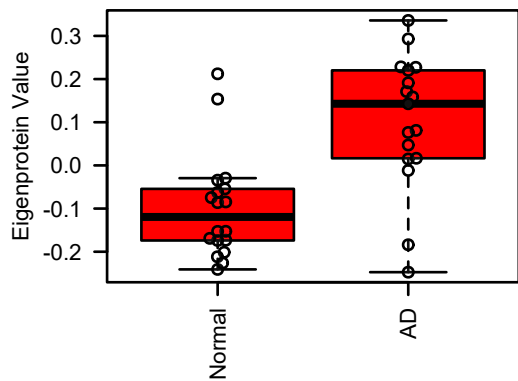

**MEred.Brain (Synthetic)**  
ANOVA p: 0.79

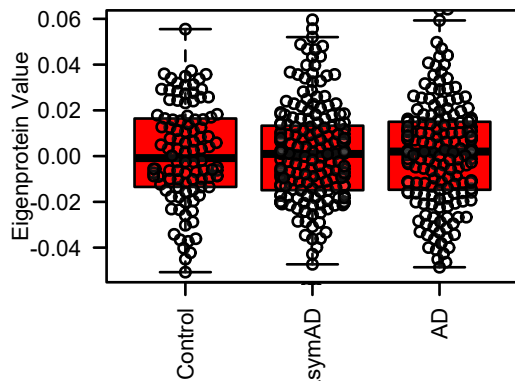

**MEred.Brain (Synthetic)**  
ANOVA p: 0.98

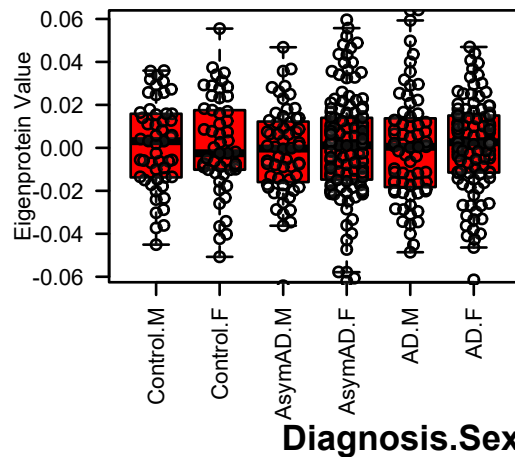

**bicor=-0.049, p=0.28**  
**cor=-0.0061, p=0.89**

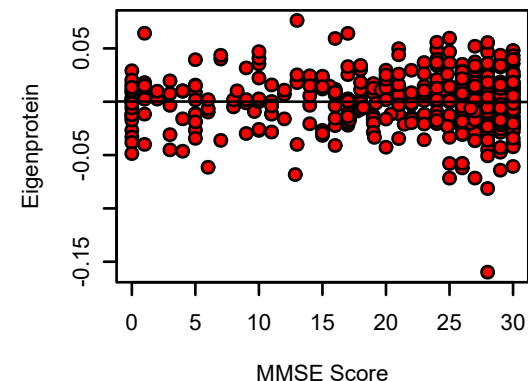

**M12 tan.Plasma35**  
Matrisome

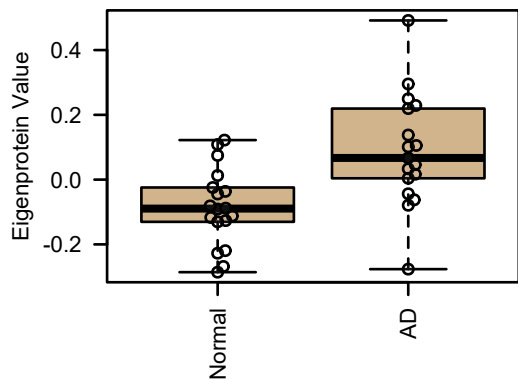

**MEtan.Brain (Synthetic)**  
ANOVA p: 0.00064

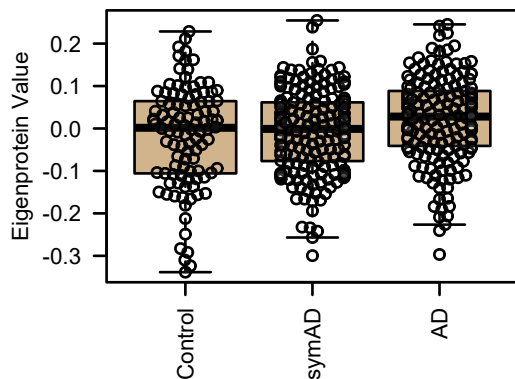

**MEtan.Brain (Synthetic)**  
ANOVA p: 0.0042

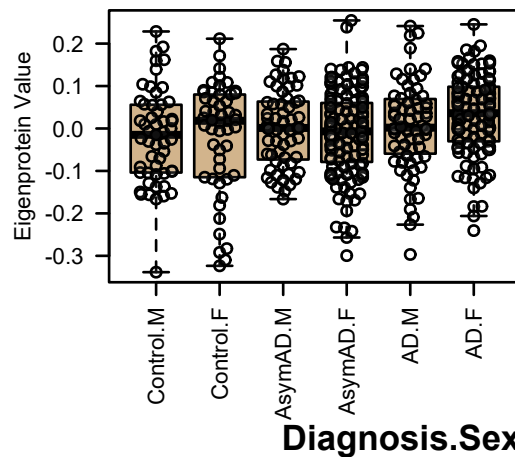

**bicor=-0.14, p=0.0025**  
**cor=-0.14, p=0.0019**

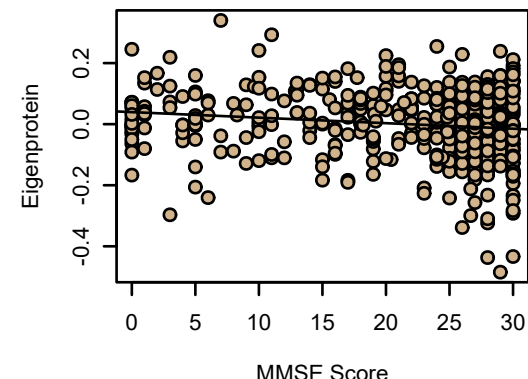

**M5 green.Plasma35**  
ECM/IGF-PDGF Binding

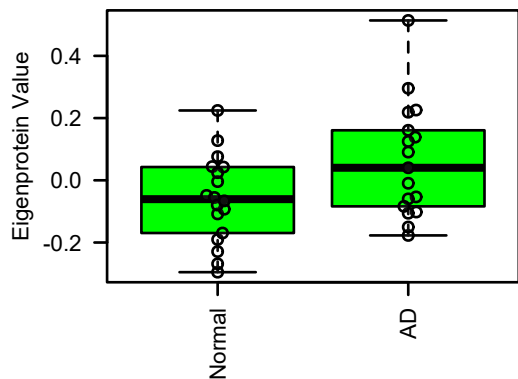

**MEgreen.Brain (Synthetic)**  
ANOVA p: 0.00092

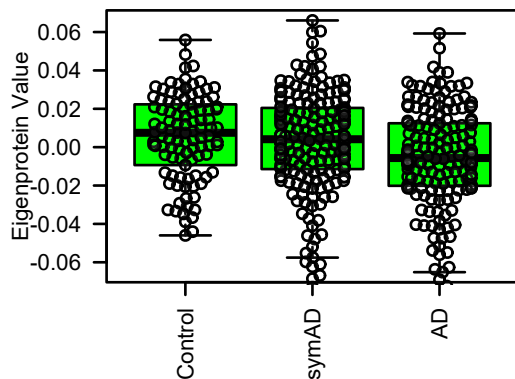

**MEgreen.Brain (Synthetic)**  
ANOVA p: 0.0075

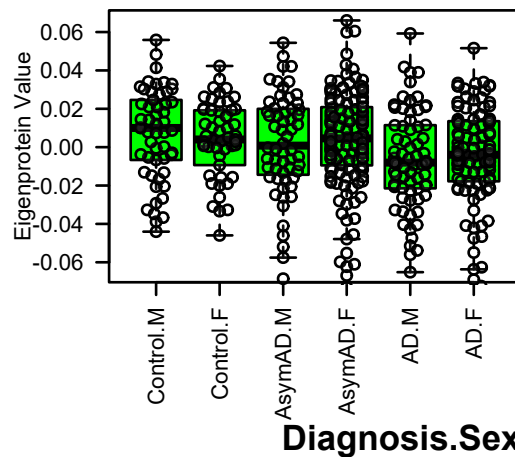

**bicor=0.14, p=0.002**  
**cor=0.17, p=0.00016**

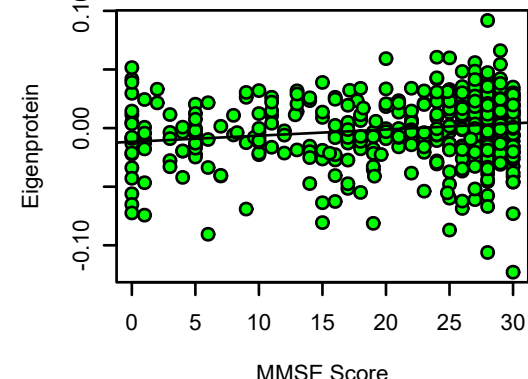

**M7 black.Plasma35**  
TNF/Ephrin Signaling

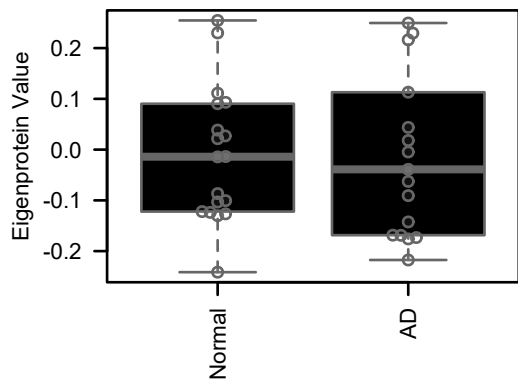

**MEblack.Brain (Synthetic)**  
ANOVA p: 0.72

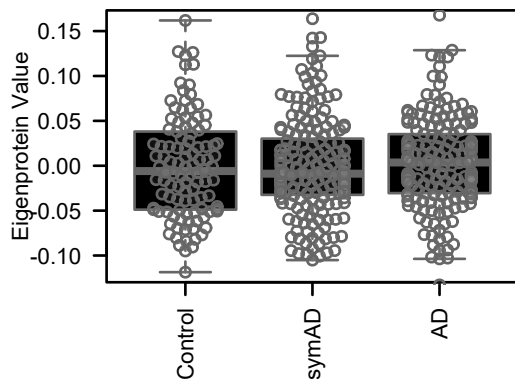

**MEblack.Brain (Synthetic)**  
ANOVA p: 0.73

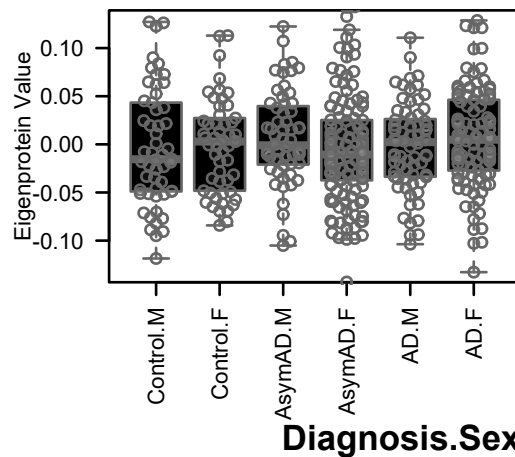

**bicor=-0.046, p=0.31**  
**cor=-0.045, p=0.32**

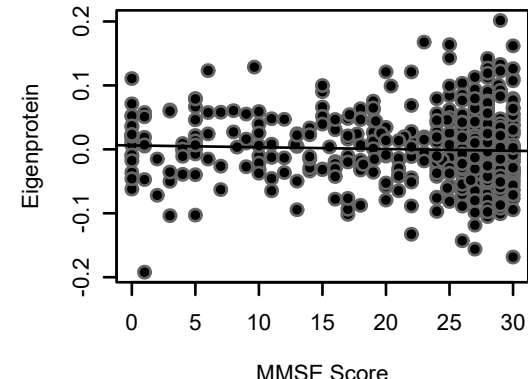

**M30 steelblue.Plasma35**  
**Ambiguous**

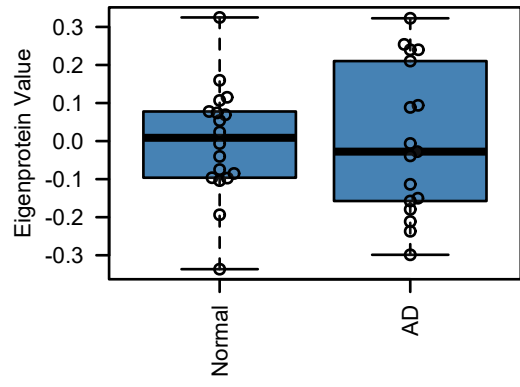

**MEsteelblue.Brain (Synthetic)**  
**ANOVA p: 9.2e-05**

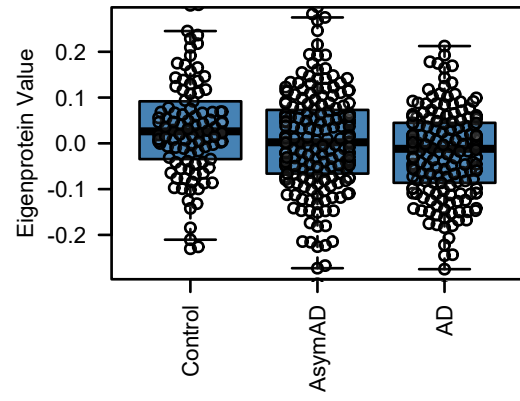

**MEsteelblue.Brain (Synthetic)**  
**ANOVA p: 0.00056**

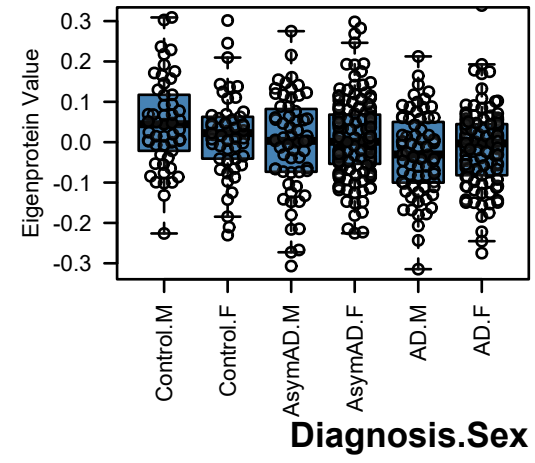

**bicor=0.096, p=0.034**  
**cor=0.14, p=0.0019**

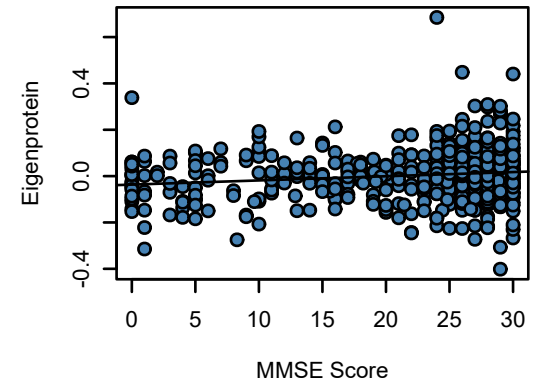

**M26 darkorange.Plasma35**  
**Bicarbonate Transport/Peroxidase**

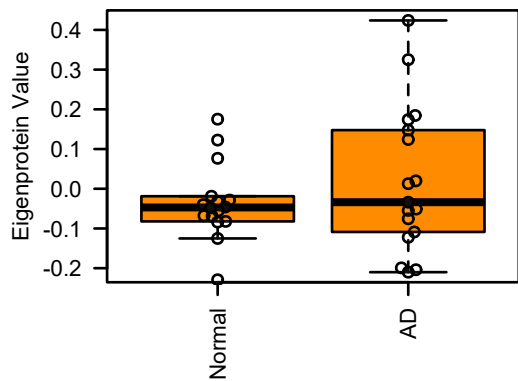

**MEdarkorange.CSF 35 Samp. (Synthetic)**  
**ANOVA p: 0.86**

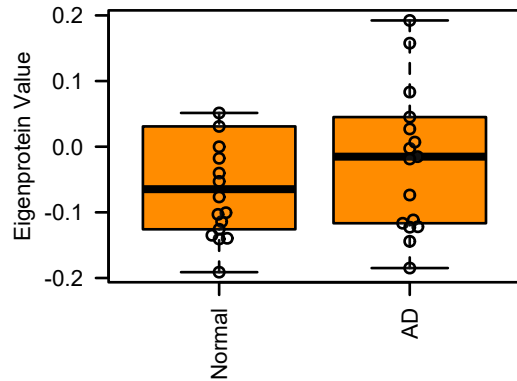

**MEdarkorange.CSF (Synthetic)**  
**ANOVA p: 0.27**

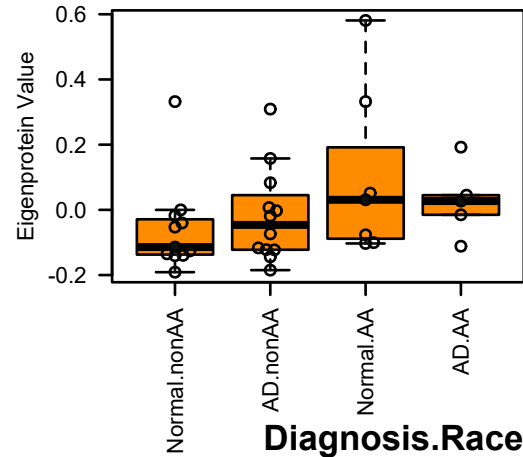

**MEdarkorange.CSF (Synthetic)**  
**ANOVA p: 0.98**

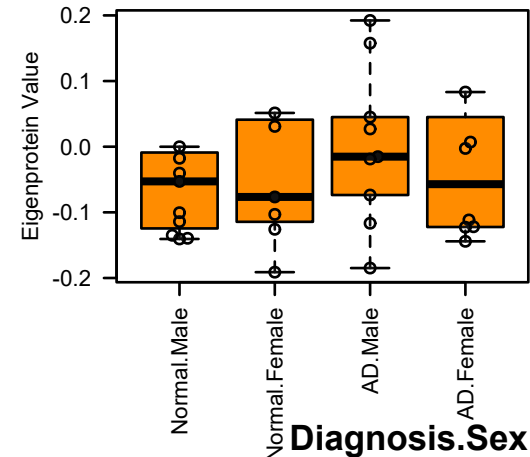

**bicor=0.078, p=0.66**  
**cor=0.28, p=0.1**

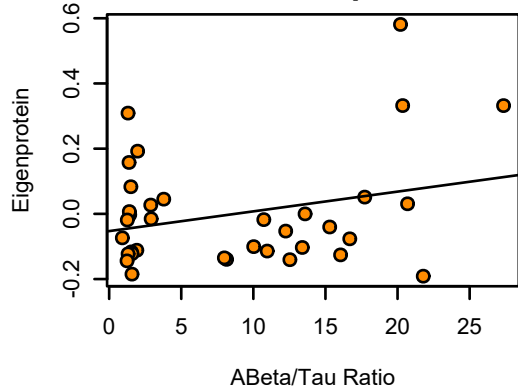

**bicor=-0.21, p=0.26**  
**cor=-0.19, p=0.31**

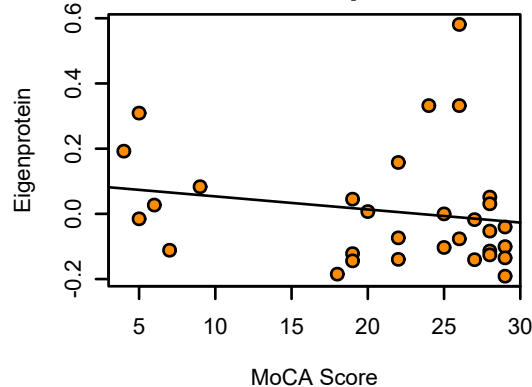

**bicor=-0.13, p=0.61**  
**cor=0.096, p=0.7**

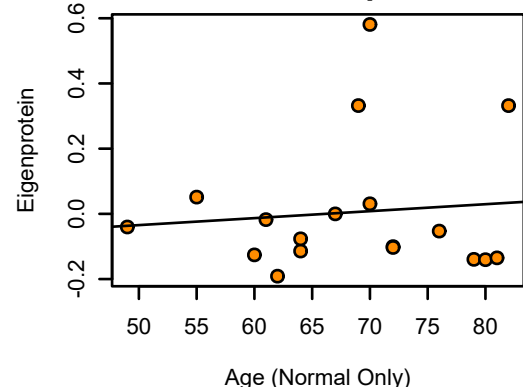

**bicor=-0.14, p=0.59**  
**cor=-0.14, p=0.59**

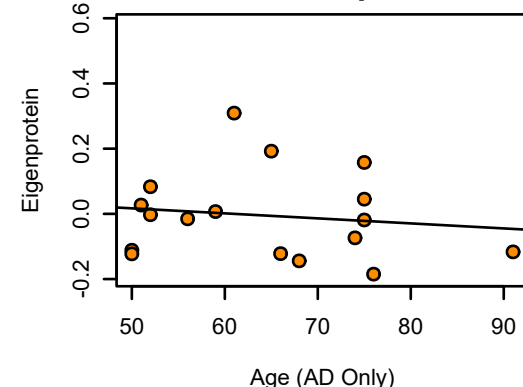

**M9 magenta.Plasma35**  
**Leukocyte Chemotaxis**

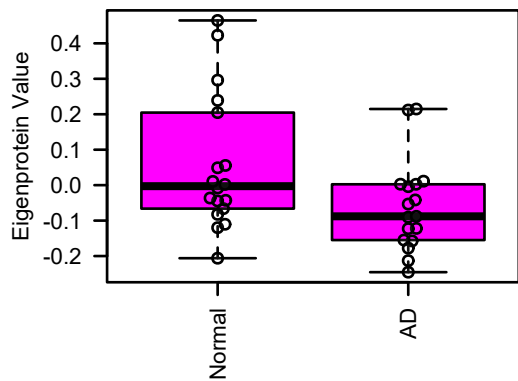

**MEmagenta.CSF 35 Samp. (Synthetic)**  
**ANOVA p: 0.59**

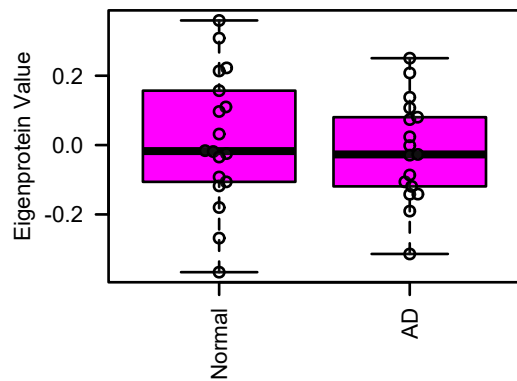

**MEmagenta.CSF (Synthetic)**  
**ANOVA p: 0.012**

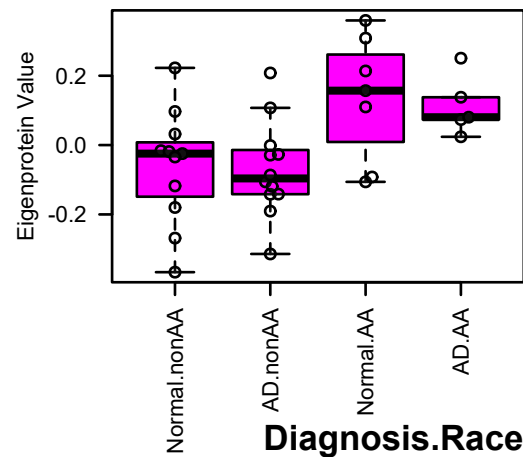

**MEmagenta.CSF (Synthetic)**  
**ANOVA p: 0.071**

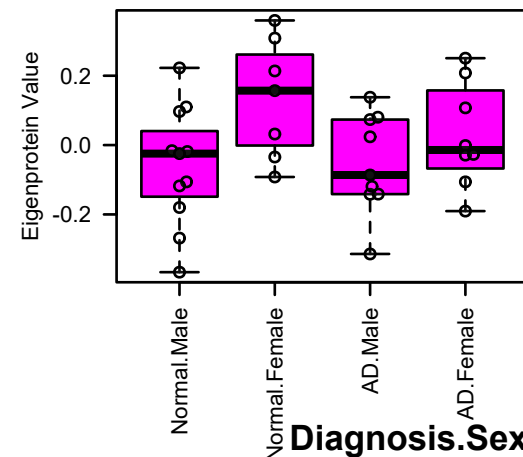

**bicor=0.35, p=0.042**  
**cor=0.35, p=0.039**

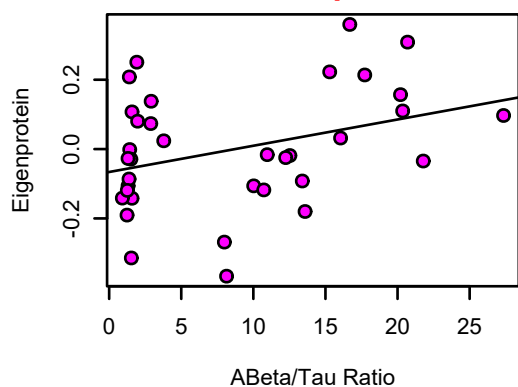

**bicor=0.0016, p=0.99**  
**cor=-0.099, p=0.6**

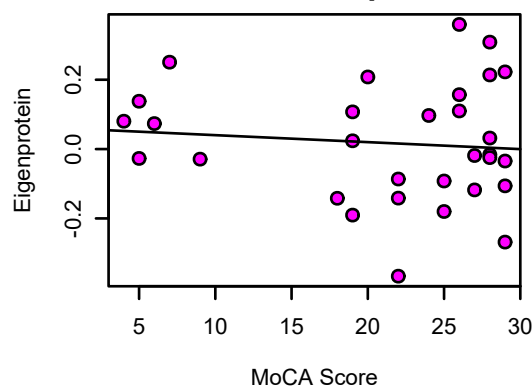

**bicor=-0.46, p=0.056**  
**cor=-0.46, p=0.055**

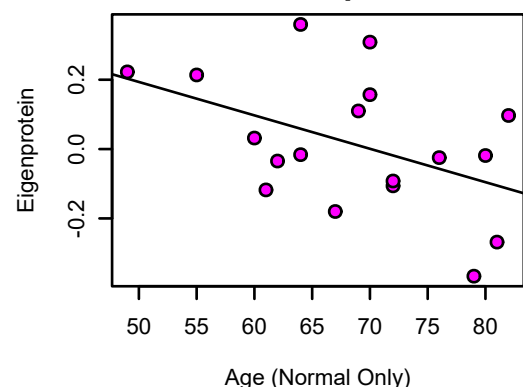

**bicor=-0.63, p=0.0063**  
**cor=-0.65, p=0.0047**

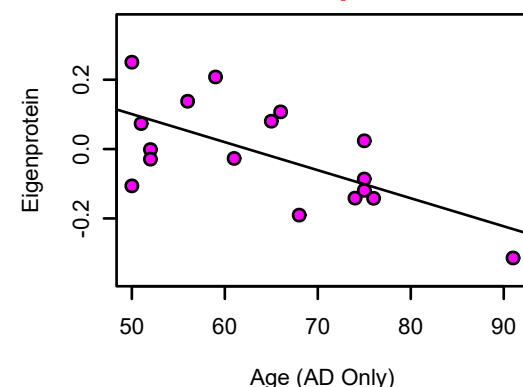

**M1 turquoise.Plasma35**  
Cellular Metabolism/Intracellular Transpor

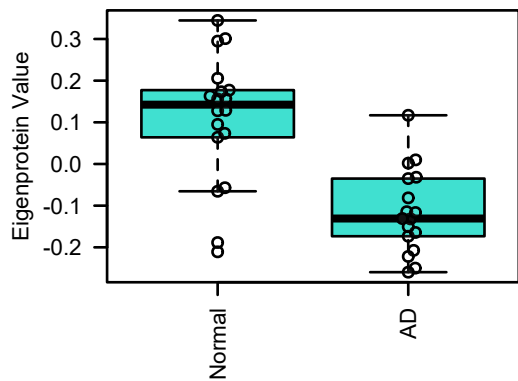

**MEturquoise.CSF 35 Samp. (Synthetic)**  
ANOVA p: 0.54

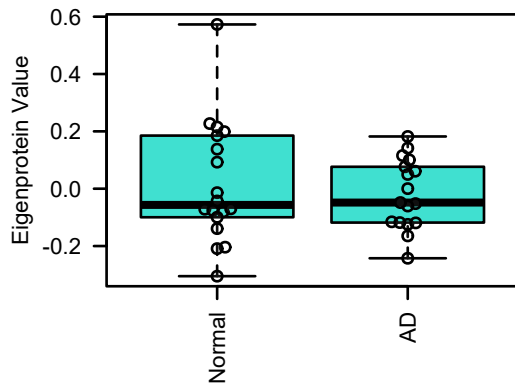

**MEturquoise.CSF (Synthetic)**  
ANOVA p: 0.019

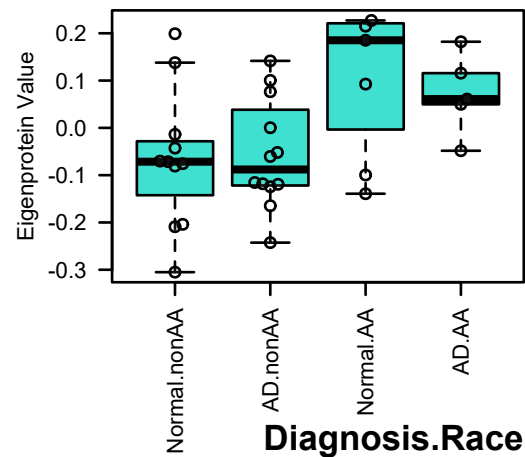

**MEturquoise.CSF (Synthetic)**  
ANOVA p: 0.18

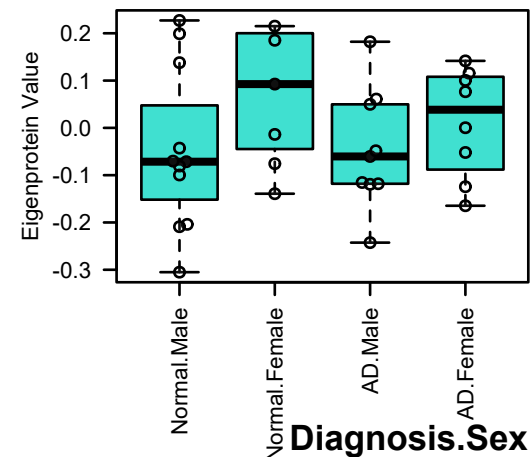

**bicor=0.33, p=0.051**  
**cor=0.39, p=0.021**

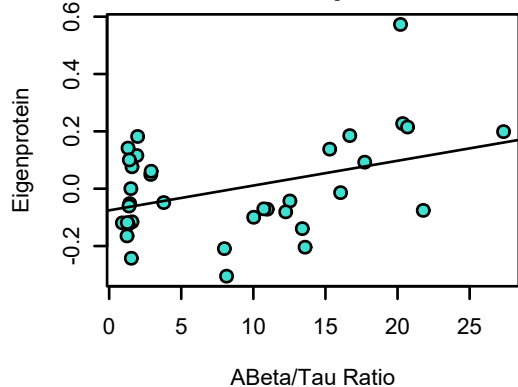

**bicor=-0.05, p=0.79**  
**cor=-0.15, p=0.42**

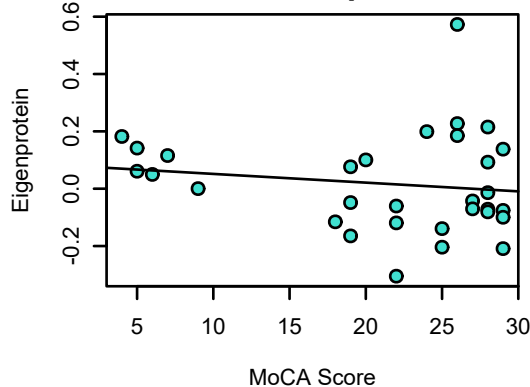

**bicor=-0.27, p=0.27**  
**cor=-0.21, p=0.4**

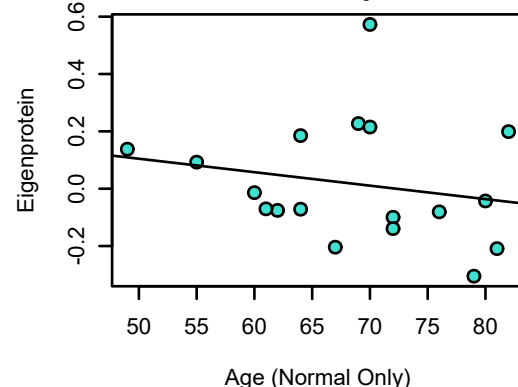

**bicor=-0.56, p=0.019**  
**cor=-0.56, p=0.019**

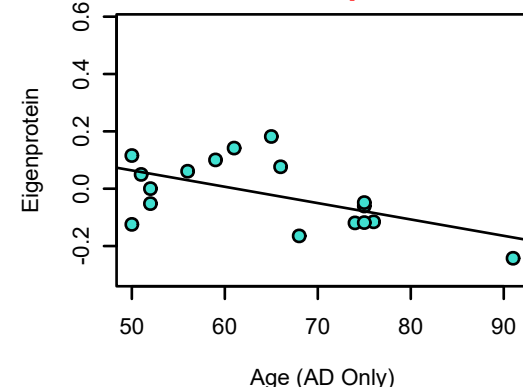

**M2 blue.Plasma35**  
Ambiguous

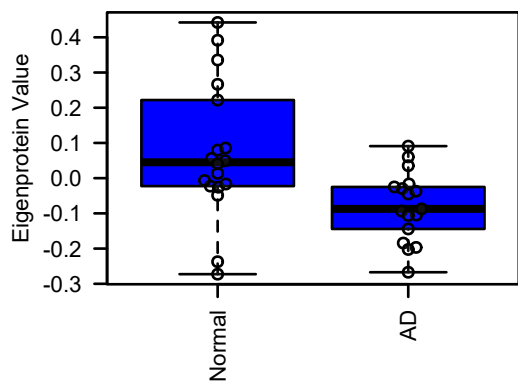

**MEblue.CSF 35 Samp. (Synthetic)**  
ANOVA p: 0.84

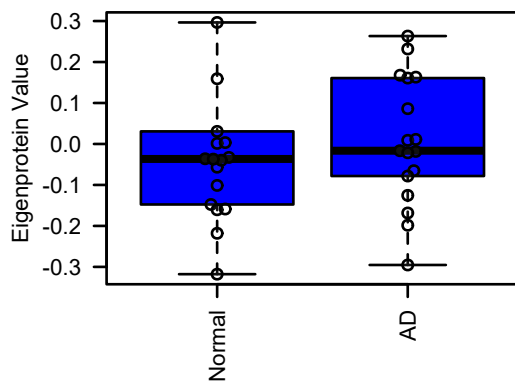

**MEblue.CSF (Synthetic)**  
ANOVA p: 0.092

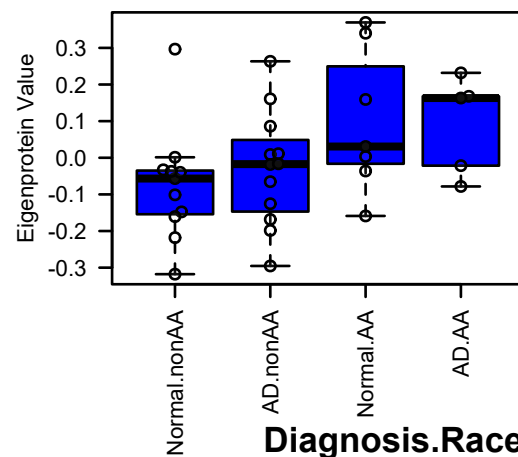

**MEblue.CSF (Synthetic)**  
ANOVA p: 0.14

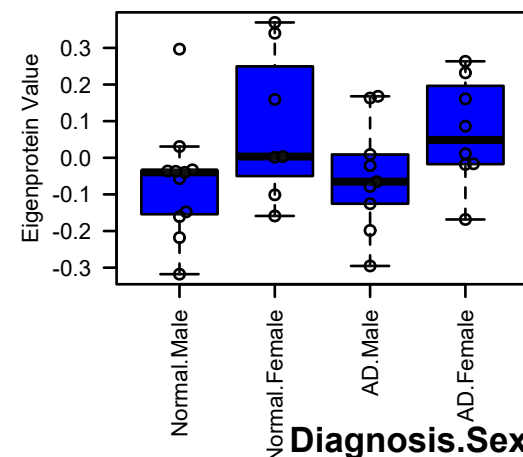

**bicor=0.13, p=0.46**  
**cor=0.15, p=0.39**

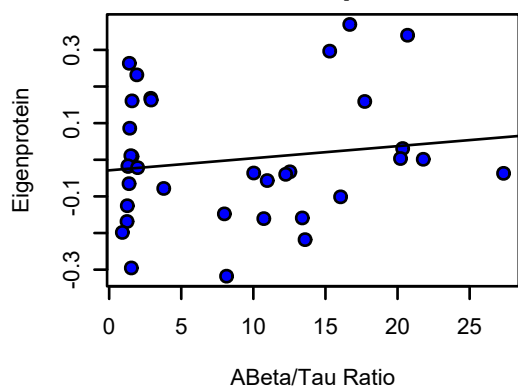

**bicor=-0.072, p=0.7**  
**cor=-0.15, p=0.42**

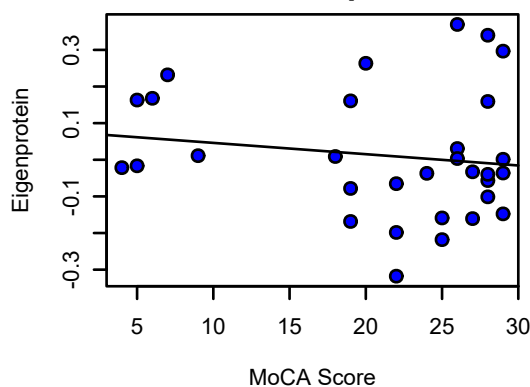

**bicor=-0.45, p=0.058**  
**cor=-0.46, p=0.055**

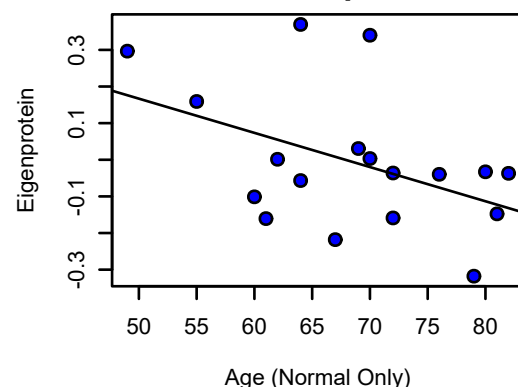

**bicor=-0.73, p=0.00079**  
**cor=-0.74, p=0.00068**

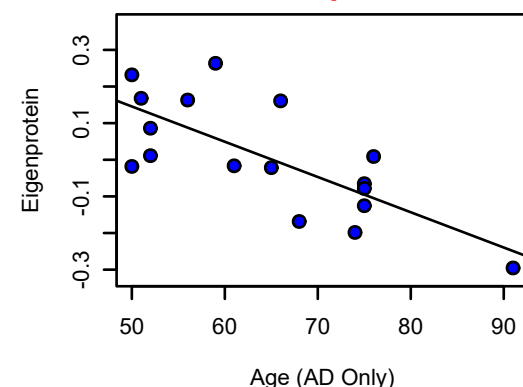

**M31 paleturquoise.Plasma35**  
**Adhesion/ECM**

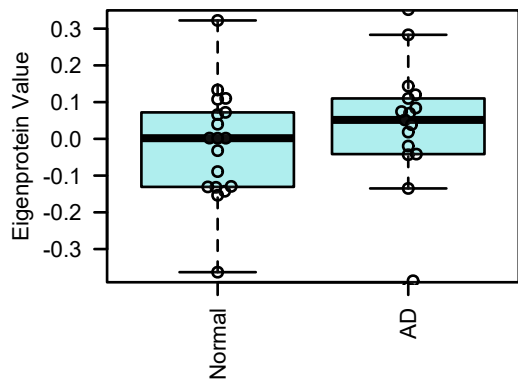

**MEpaleturquoise.CSF 35 Samp. (Synthetic)**  
**ANOVA p: 0.93**

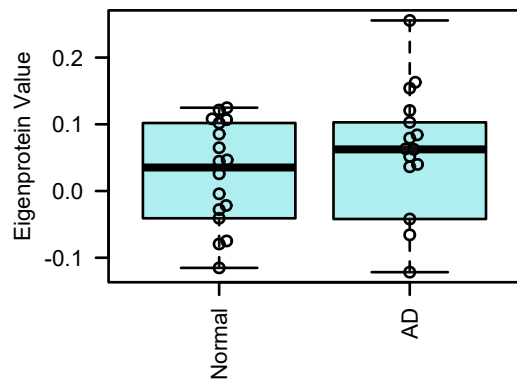

**MEpaleturquoise.CSF (Synthetic)**  
**ANOVA p: 0.42**

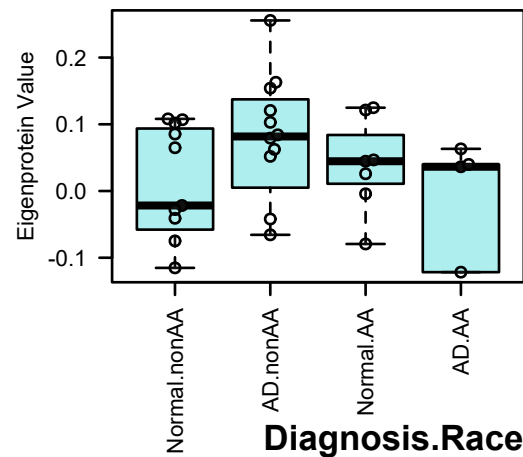

**MEpaleturquoise.CSF (Synthetic)**  
**ANOVA p: 0.79**

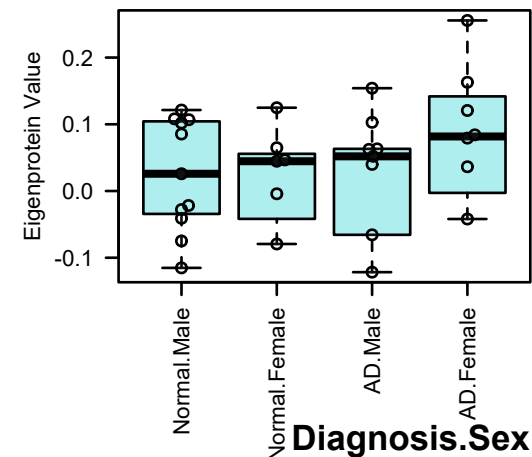

**bicor=-0.18, p=0.31**  
**cor=-0.021, p=0.9**

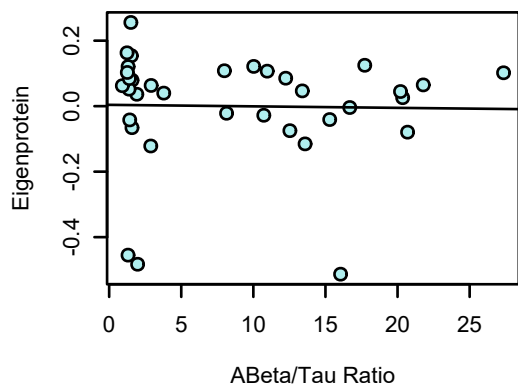

**bicor=-0.056, p=0.76**  
**cor=0.28, p=0.13**

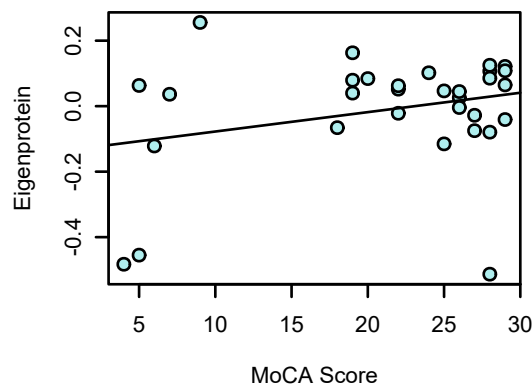

**bicor=0.13, p=0.62**  
**cor=0.25, p=0.32**

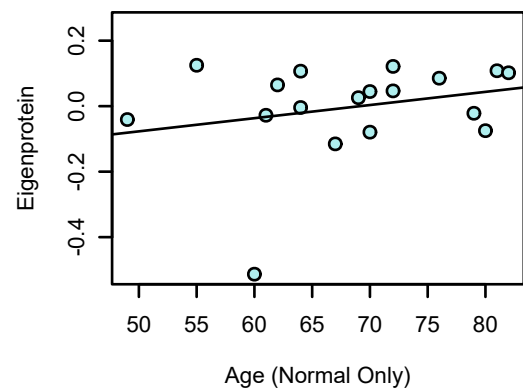

**bicor=0.13, p=0.61**  
**cor=0.097, p=0.71**

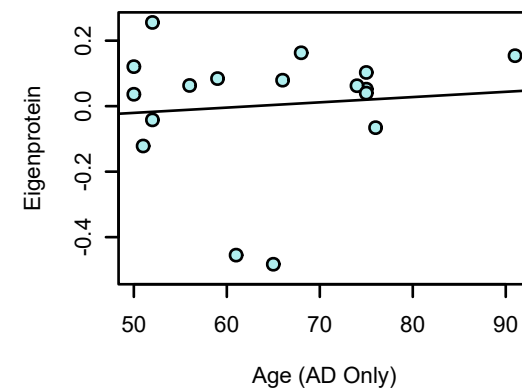

**M14 cyan.Plasma35**  
**Innate Immune Response**

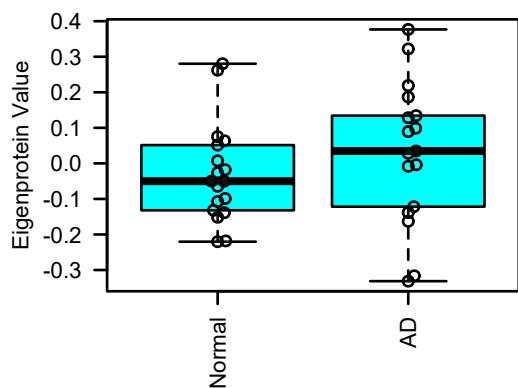

**MEcyan.CSF 35 Samp. (Synthetic)**  
**ANOVA p: 0.16**

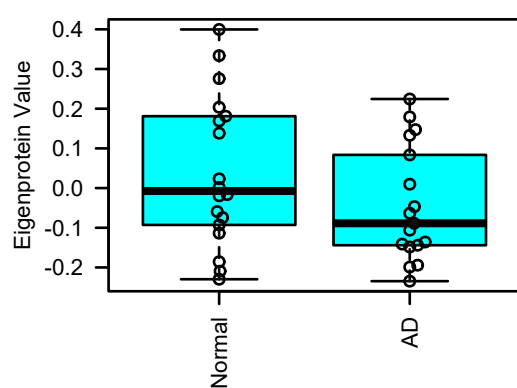

**MEcyan.CSF (Synthetic)**  
**ANOVA p: 0.2**

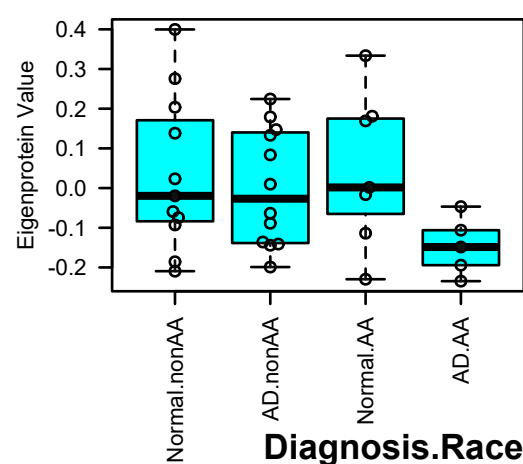

**MEcyan.CSF (Synthetic)**  
**ANOVA p: 0.28**

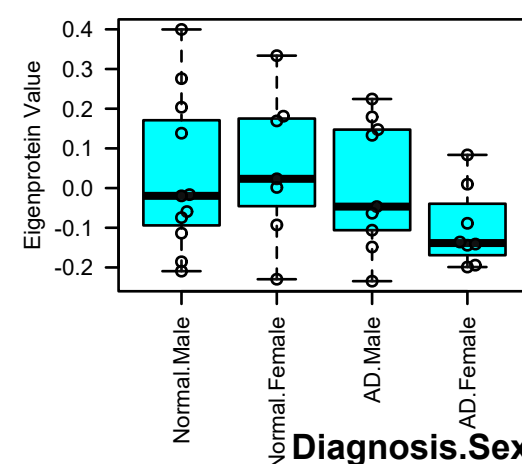

**bicor=0.29, p=0.091**  
**cor=0.32, p=0.061**

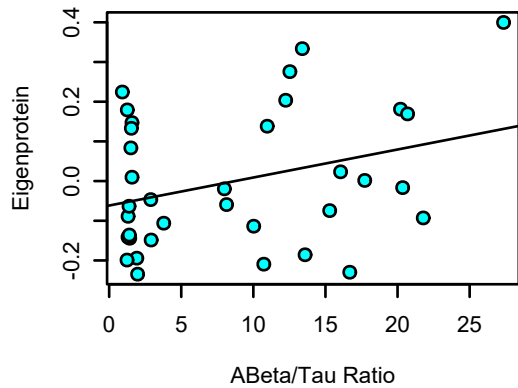

**bicor=0.14, p=0.46**  
**cor=0.34, p=0.061**

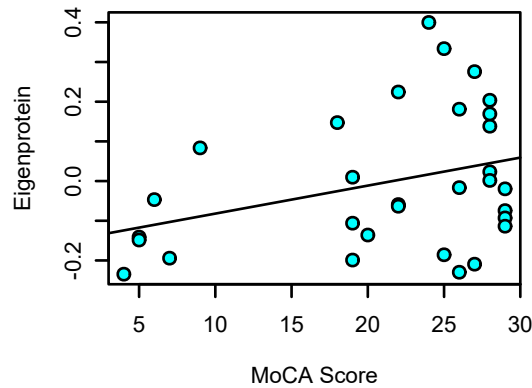

**bicor=0.46, p=0.055**  
**cor=0.5, p=0.035**

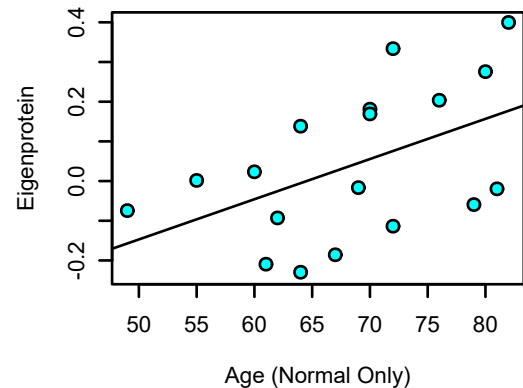

**bicor=0.48, p=0.053**  
**cor=0.53, p=0.029**

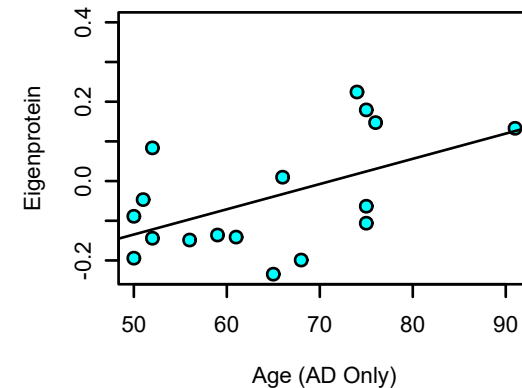

**M19 lightyellow.Plasma35**  
**Leukocyte Activation**

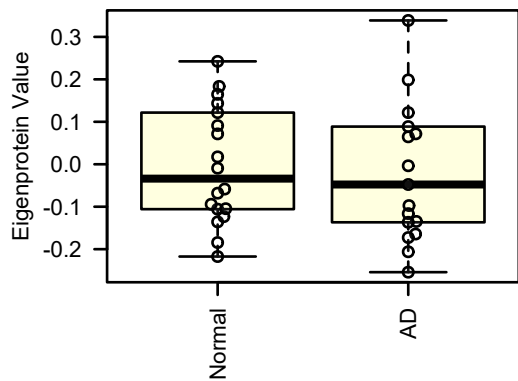

**MElightyellow.CSF 35 Samp. (Synthetic)**  
**ANOVA p: 0.081**

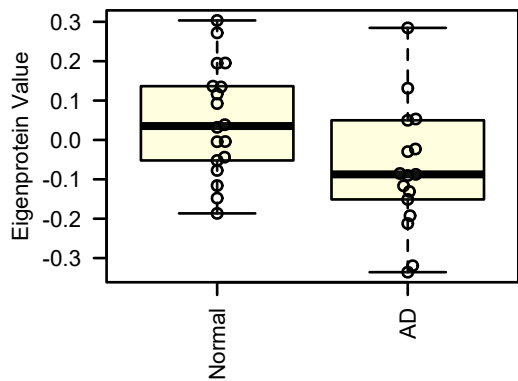

**MElightyellow.CSF (Synthetic)**  
**ANOVA p: 0.038**

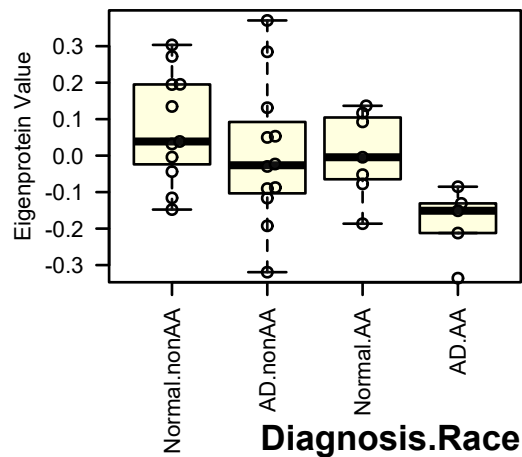

**MElightyellow.CSF (Synthetic)**  
**ANOVA p: 0.22**

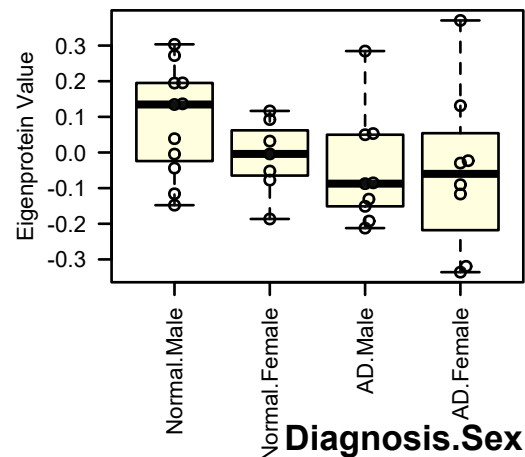

**bicor=0.15, p=0.38**  
**cor=0.12, p=0.49**

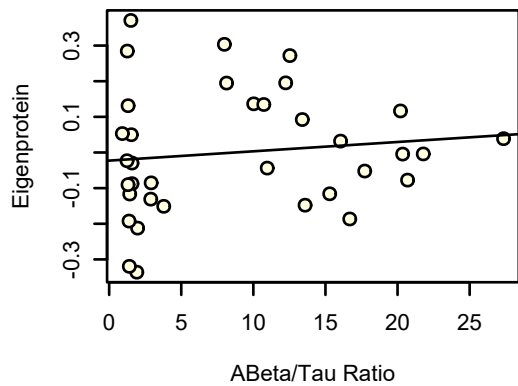

**bicor=0.32, p=0.081**  
**cor=0.34, p=0.061**

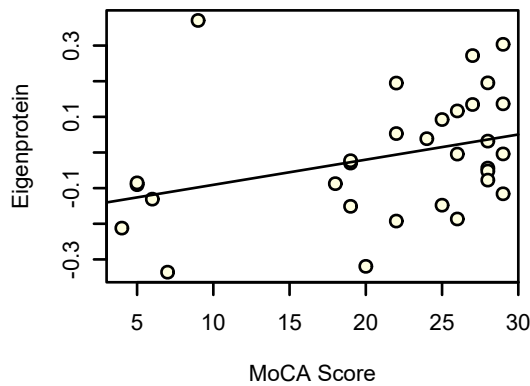

**bicor=0.66, p=0.0029**  
**cor=0.67, p=0.0023**

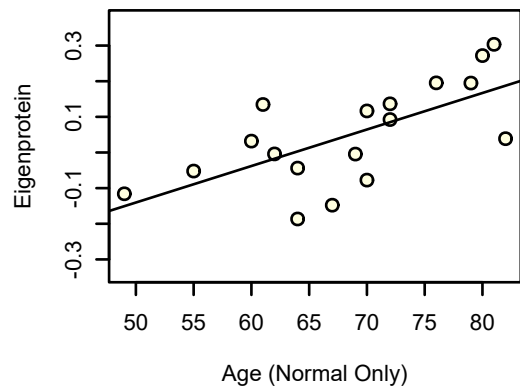

**bicor=0.17, p=0.52**  
**cor=0.12, p=0.65**

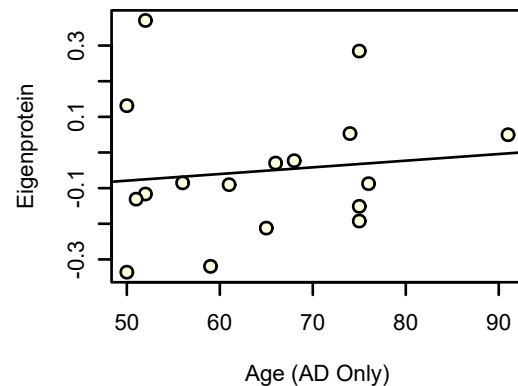

**M15 midnightblue.Plasma35**  
**Lipid Biosynthesis/Immune Response**

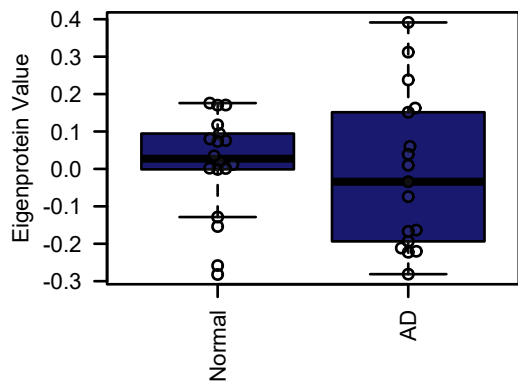

**MEmidnightblue.CSF 35 Samp. (Synthetic)**  
**ANOVA p: 0.072**

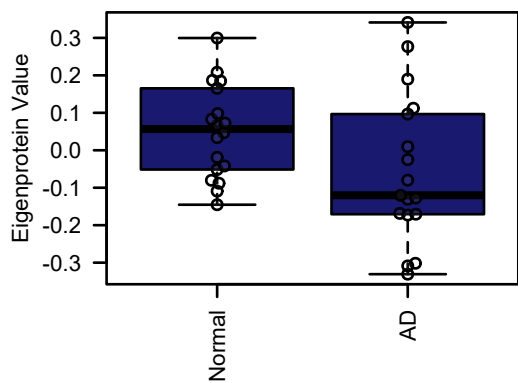

**MEmidnightblue.CSF (Synthetic)**  
**ANOVA p: 0.18**

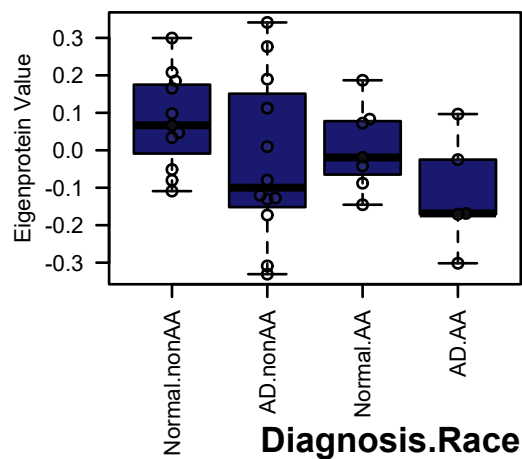

**MEmidnightblue.CSF (Synthetic)**  
**ANOVA p: 0.023**

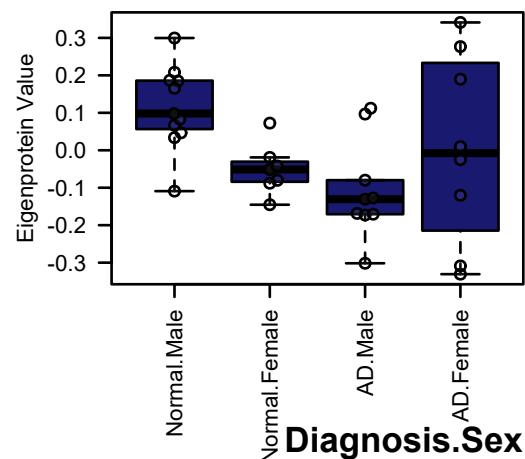

**bicor=0.16, p=0.36**  
**cor=0.13, p=0.46**

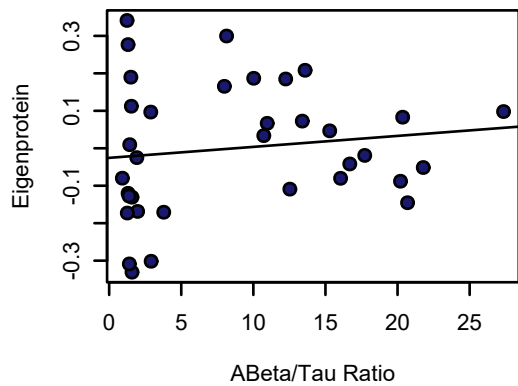

**bicor=0.14, p=0.46**  
**cor=0.1, p=0.59**

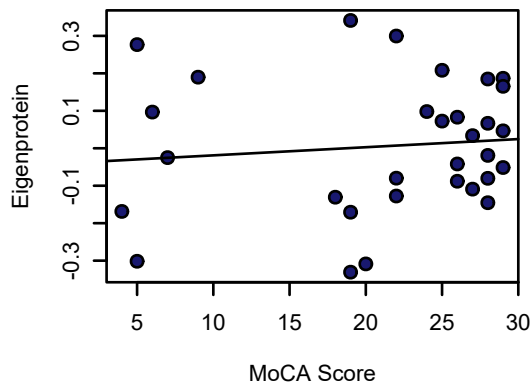

**bicor=0.38, p=0.12**  
**cor=0.36, p=0.14**

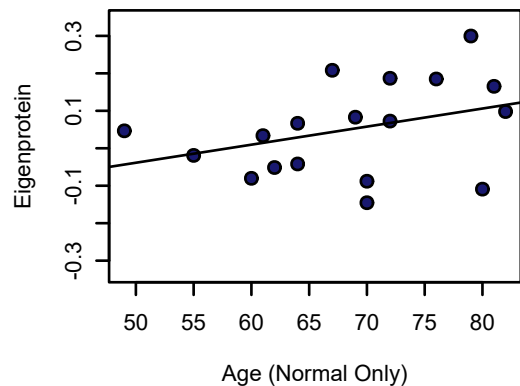

**bicor=-0.094, p=0.72**  
**cor=-0.053, p=0.84**

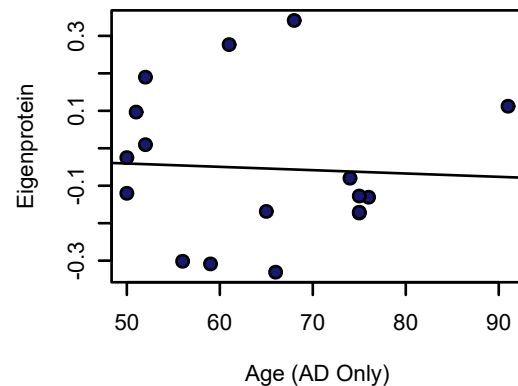

**M29 saddlebrown.Plasma35**  
**IGF-Growth/GAG Binding**

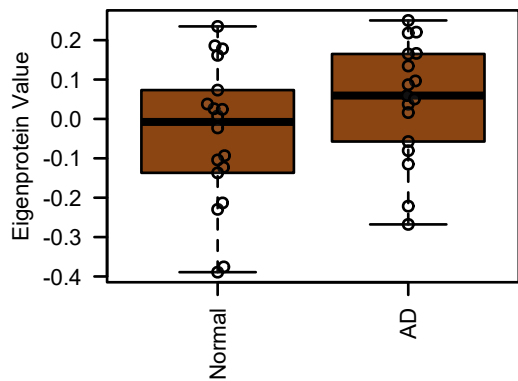

**MEsaddlebrown.CSF 35 Samp. (Synthetic)**  
**ANOVA p: 0.036**

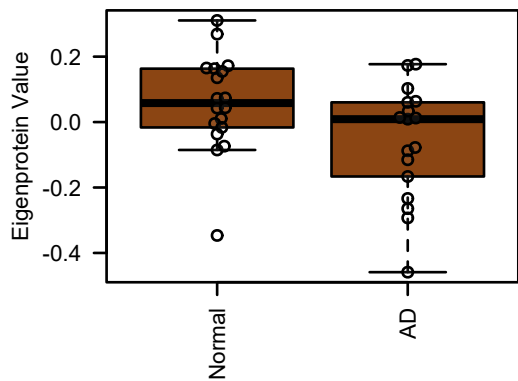

**MEsaddlebrown.CSF (Synthetic)**  
**ANOVA p: 0.0031**

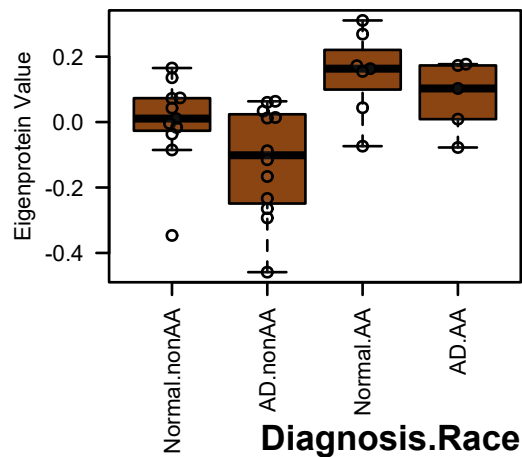

**MEsaddlebrown.CSF (Synthetic)**  
**ANOVA p: 0.031**

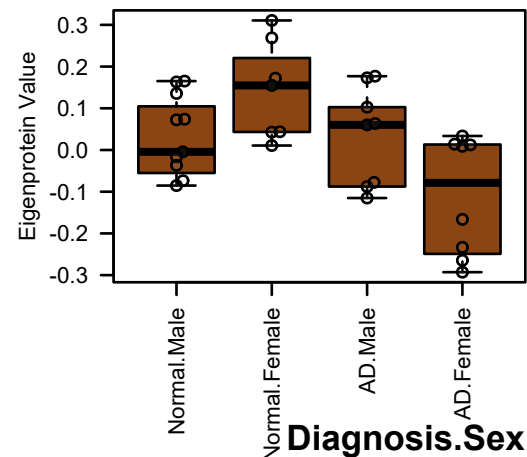

**bicor=0.5, p=0.0023**  
**cor=0.48, p=0.0035**

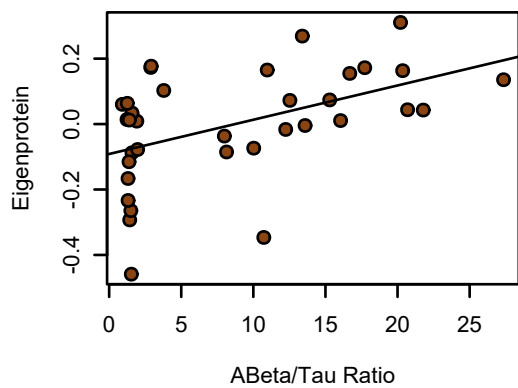

**bicor=0.21, p=0.26**  
**cor=0.19, p=0.31**

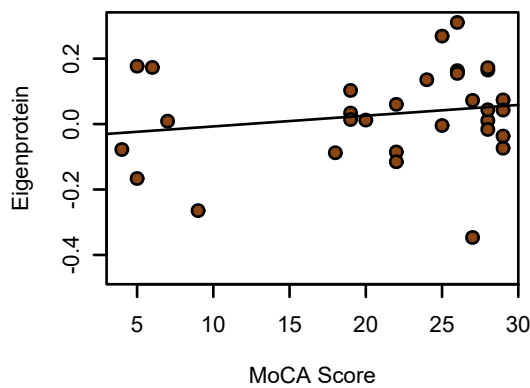

**bicor=-0.09, p=0.72**  
**cor=-0.021, p=0.93**

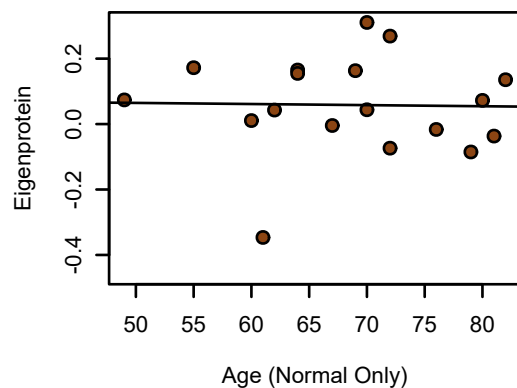

**bicor=0.016, p=0.95**  
**cor=-0.15, p=0.57**

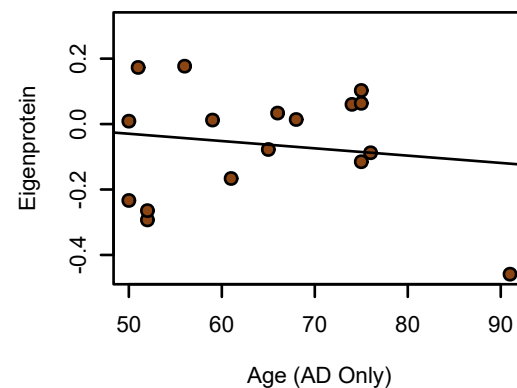

**M28 skyblue.Plasma35**  
**Complement/Humoral Immune Response**

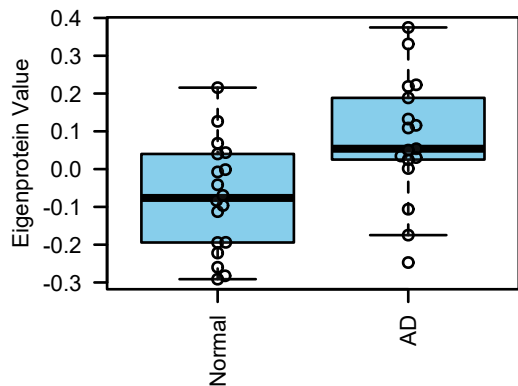

**MEskyblue.CSF 35 Samp. (Synthetic)**  
**ANOVA p: 0.83**

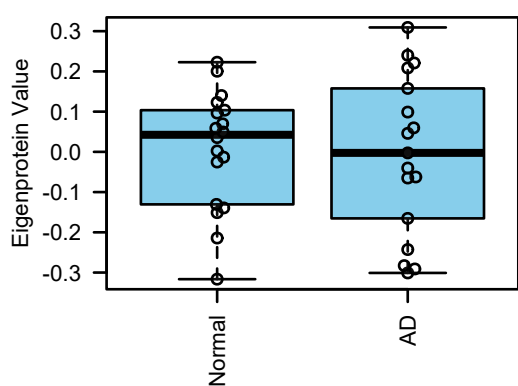

**MEskyblue.CSF (Synthetic)**  
**ANOVA p: 0.39**

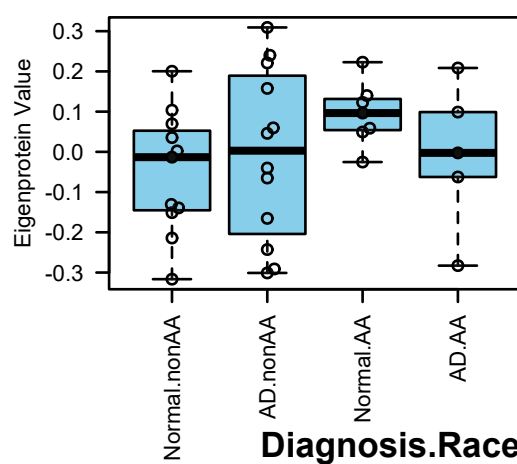

**MEskyblue.CSF (Synthetic)**  
**ANOVA p: 0.56**

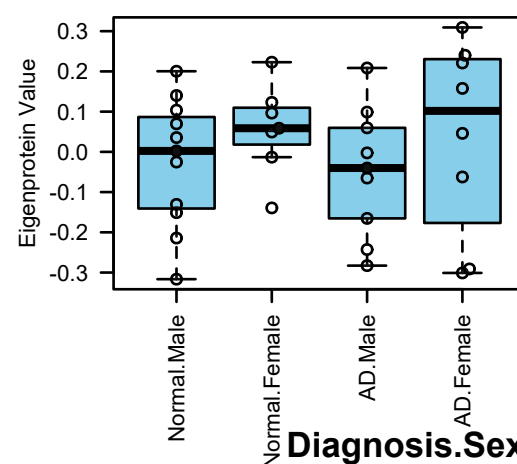

**bicor=0.18, p=0.29**  
**cor=0.21, p=0.23**

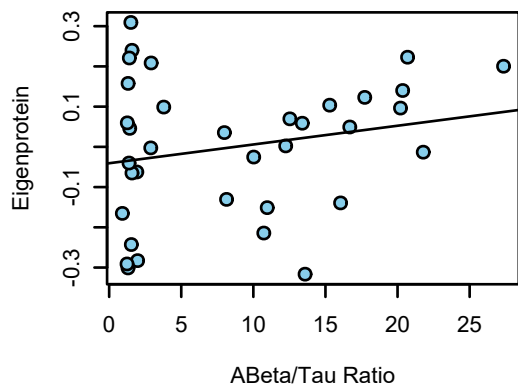

**bicor=0.0056, p=0.98**  
**cor=0.1, p=0.59**

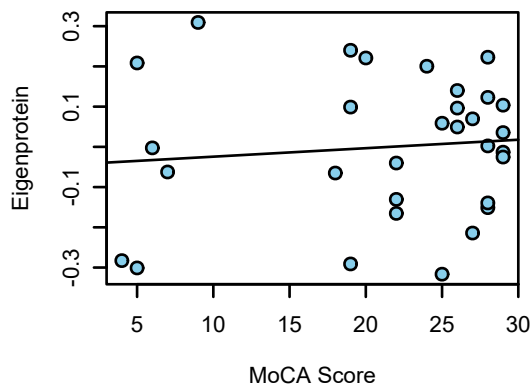

**bicor=0.17, p=0.49**  
**cor=0.15, p=0.55**

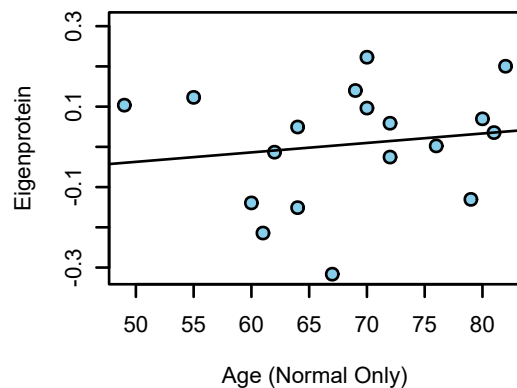

**bicor=-0.42, p=0.097**  
**cor=-0.42, p=0.093**

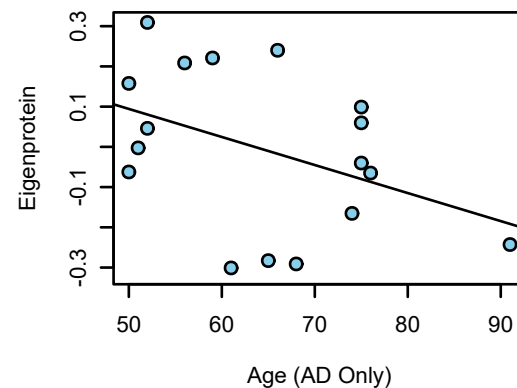



**M32 violet.Plasma35**  
**Lipoprotein Metabolism**

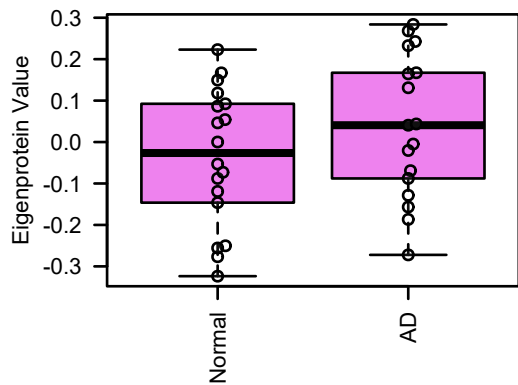

**MEviolet.CSF 35 Samp. (Synthetic)**  
**ANOVA p: 0.11**

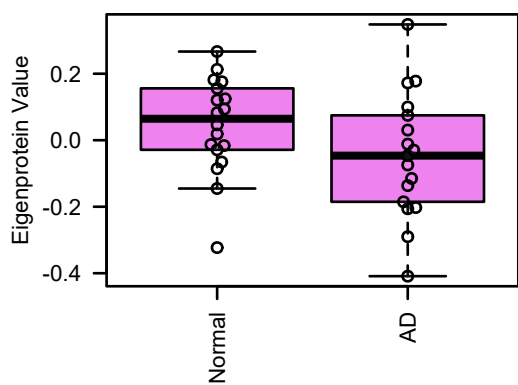

**MEviolet.CSF (Synthetic)**  
**ANOVA p: 0.11**

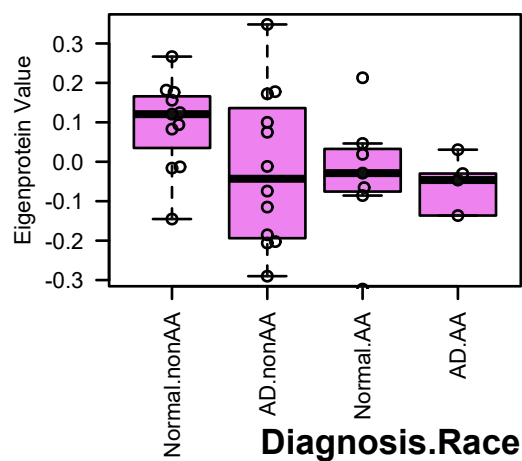

**MEviolet.CSF (Synthetic)**  
**ANOVA p: 0.22**

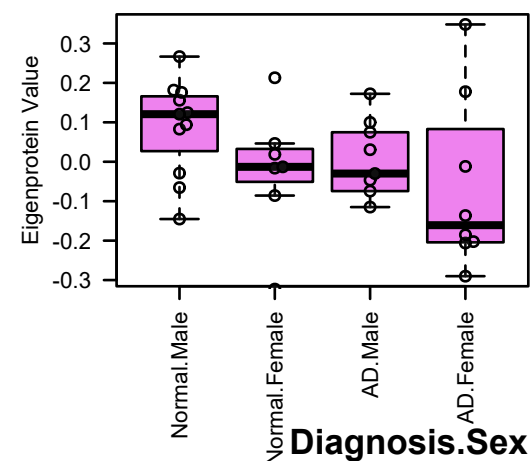

**bicor=0.16, p=0.37**  
**cor=0.14, p=0.42**

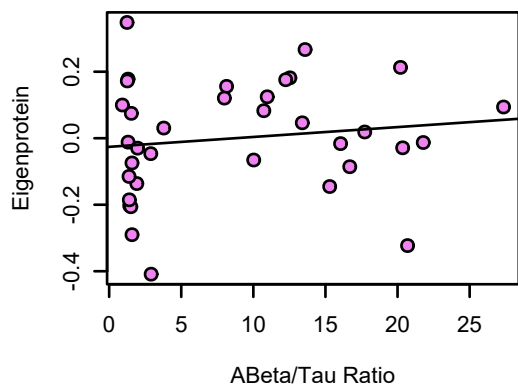

**bicor=0.19, p=0.3**  
**cor=0.28, p=0.13**

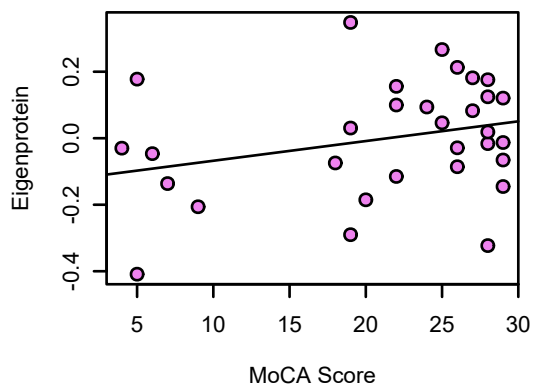

**bicor=0.47, p=0.05**  
**cor=0.41, p=0.091**

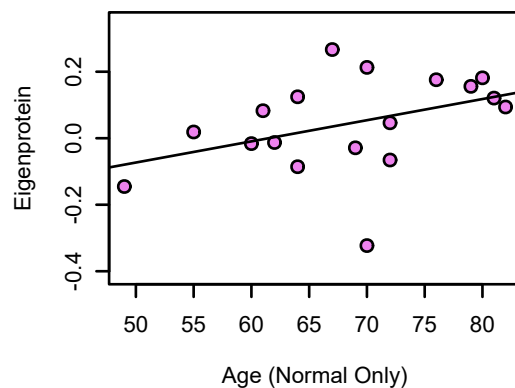

**bicor=0.45, p=0.067**  
**cor=0.43, p=0.085**

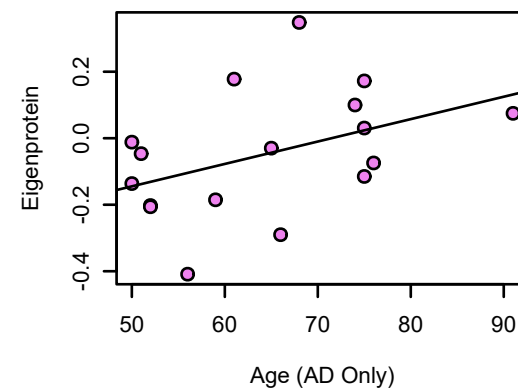

**M11 greenyellow.Plasma35**  
**Immunoglobulins/Coagulation Cascade**

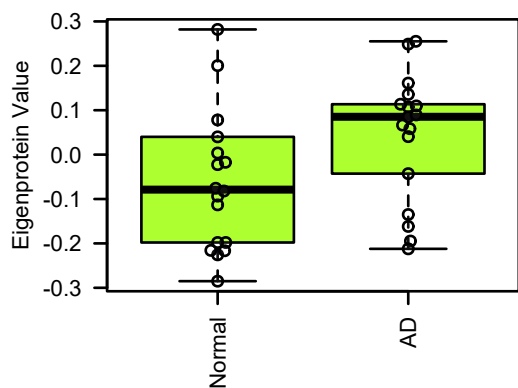

**MEgreenyellow.CSF 35 Samp. (Synthetic)**  
**ANOVA p: 0.84**

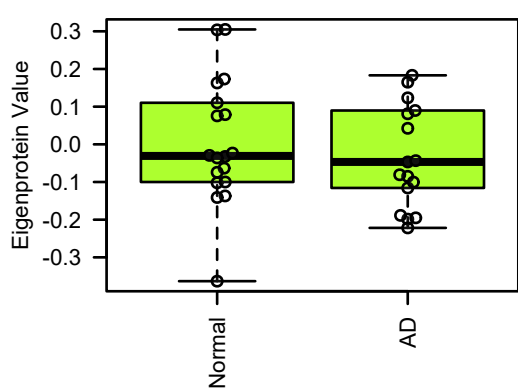

**MEgreenyellow.CSF (Synthetic)**  
**ANOVA p: 0.016**

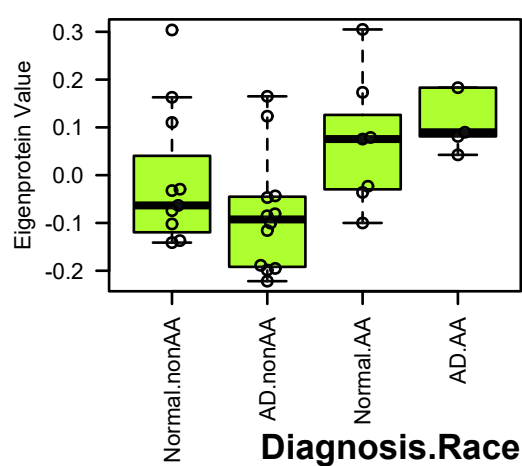

**MEgreenyellow.CSF (Synthetic)**  
**ANOVA p: 0.17**

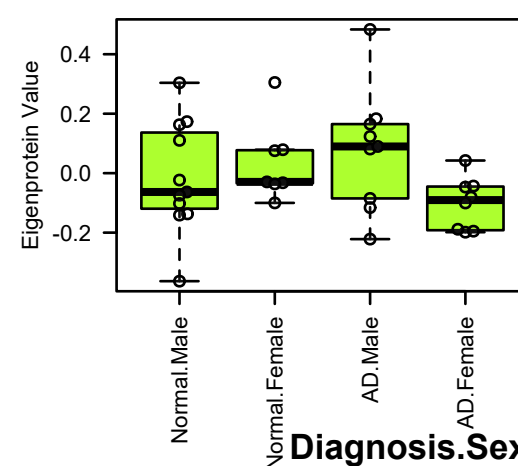

**bicor=0.24, p=0.16**  
**cor=0.19, p=0.27**

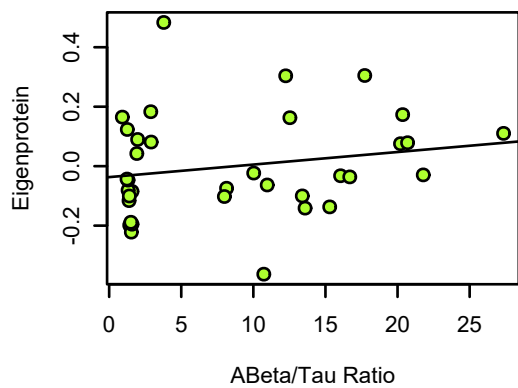

**bicor=-0.0047, p=0.98**  
**cor=-0.055, p=0.77**

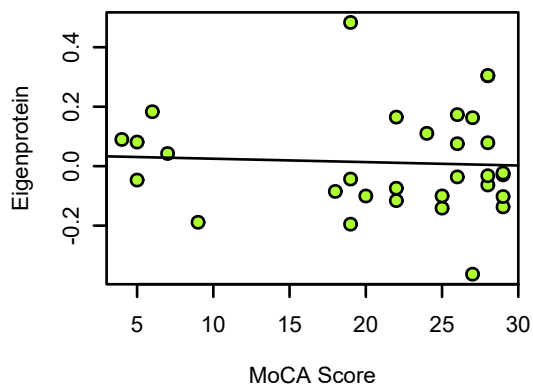

**bicor=0.23, p=0.36**  
**cor=0.23, p=0.36**

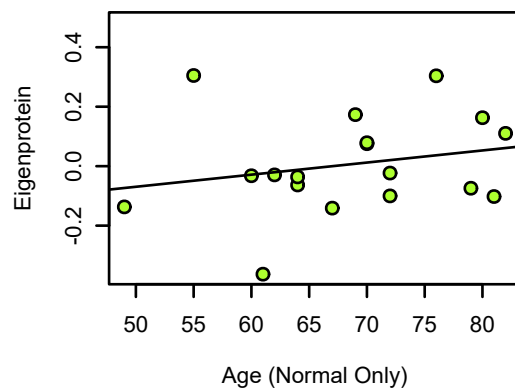

**bicor=0.038, p=0.88**  
**cor=0.069, p=0.79**

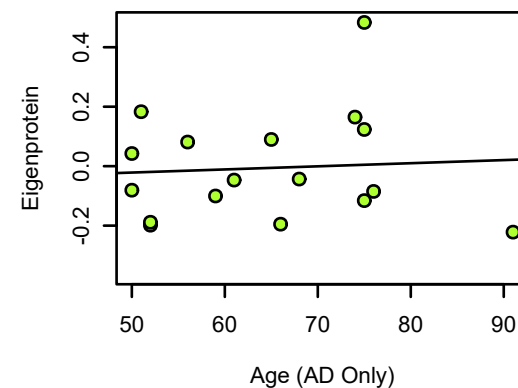

**M27 white.Plasma35  
Collagen/ECM**

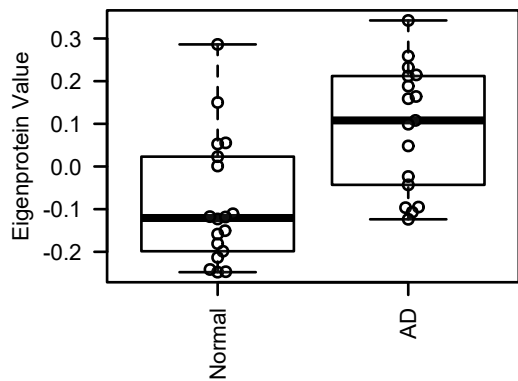

**MEwhite.CSF 35 Samp. (Synthetic)  
ANOVA p: 0.28**

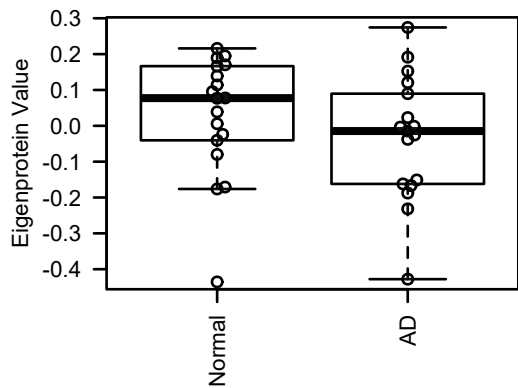

**MEwhite.CSF (Synthetic)  
ANOVA p: 0.0079**

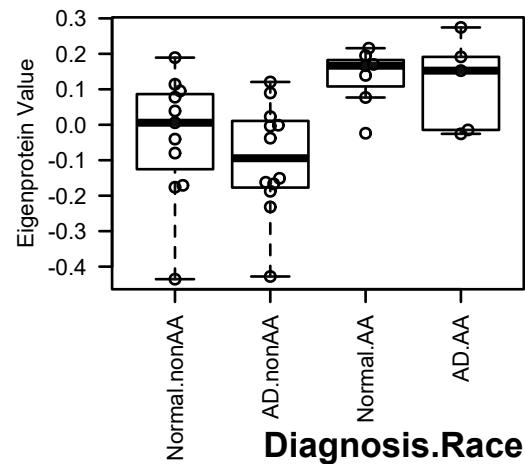

**MEwhite.CSF (Synthetic)  
ANOVA p: 0.086**

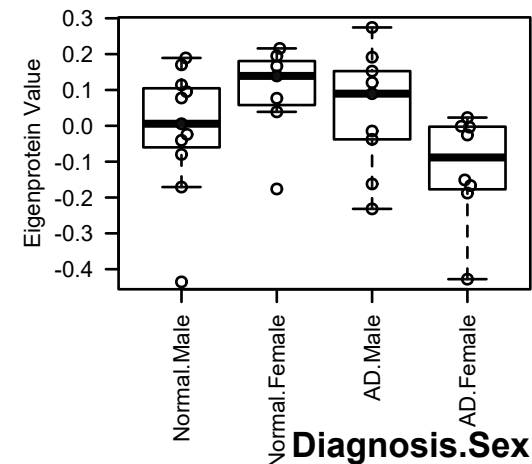

**bicor=0.32, p=0.064  
cor=0.29, p=0.091**

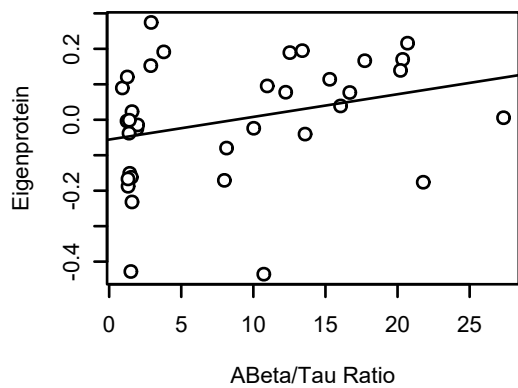

**bicor=0.17, p=0.36  
cor=0.12, p=0.52**

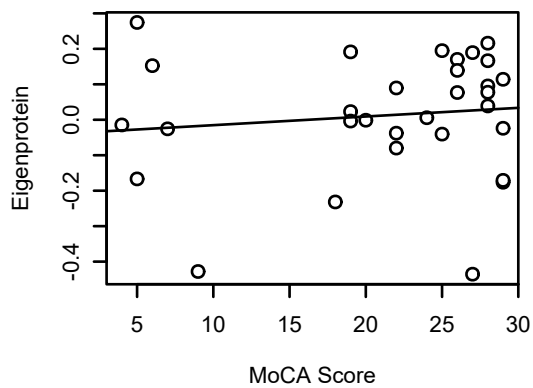

**bicor=-0.063, p=0.8  
cor=-0.0011, p=1**

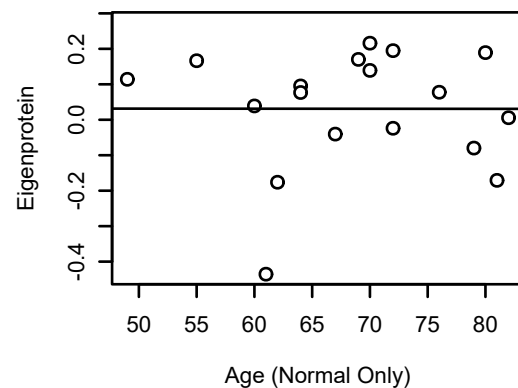

**bicor=0.1, p=0.69  
cor=0.098, p=0.71**

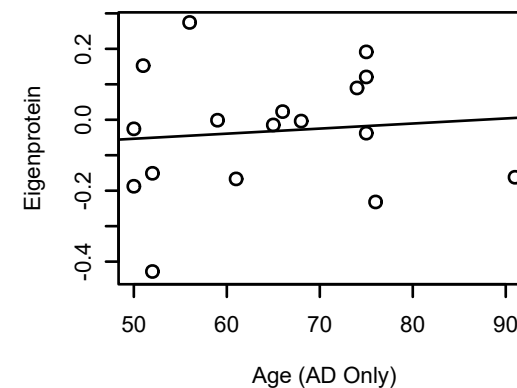

**M25 orange.Plasma35  
Lysosome**

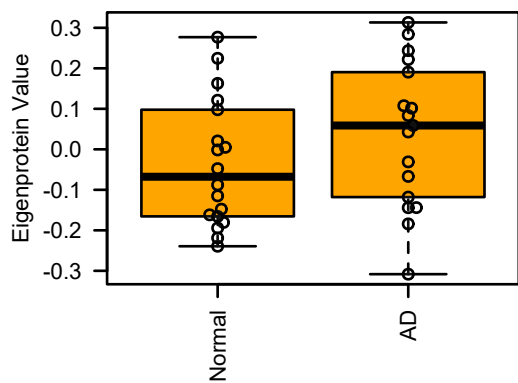

**MEorange.CSF 35 Samp. (Synthetic)  
ANOVA p: 0.24**

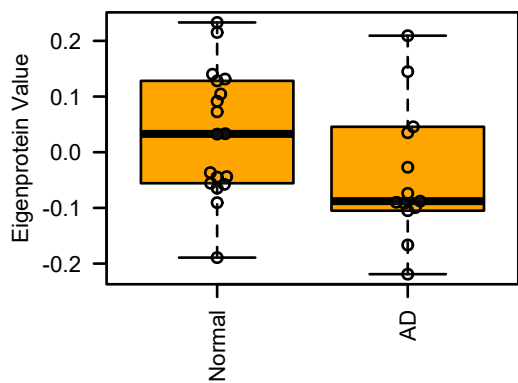

**MEorange.CSF (Synthetic)  
ANOVA p: 0.024**

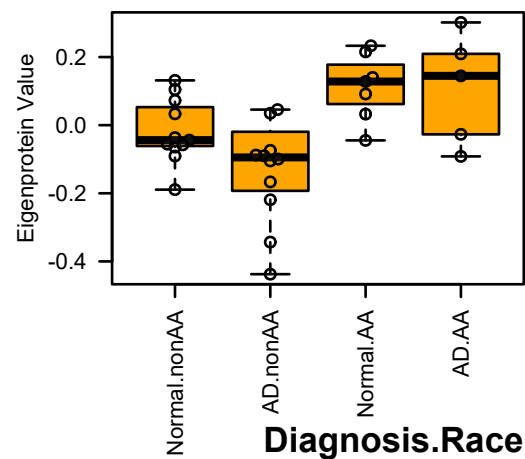

**MEorange.CSF (Synthetic)  
ANOVA p: 0.11**

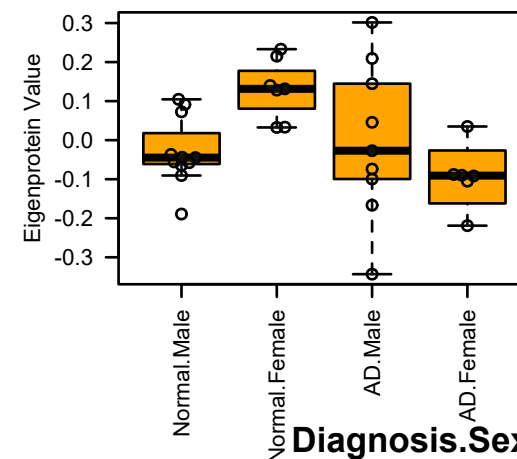

**bicor=0.42, p=0.012  
cor=0.31, p=0.07**

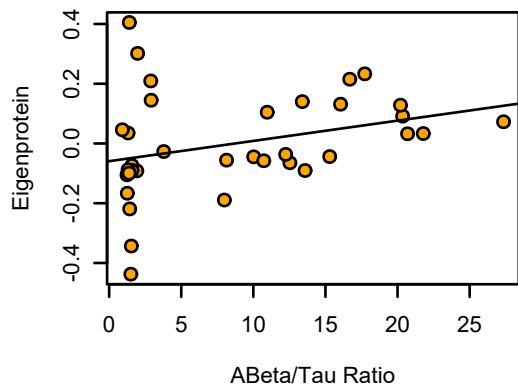

**bicor=0.1, p=0.59  
cor=-0.038, p=0.84**

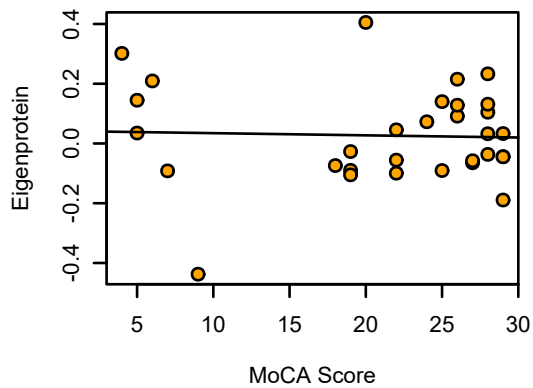

**bicor=-0.39, p=0.11  
cor=-0.38, p=0.12**

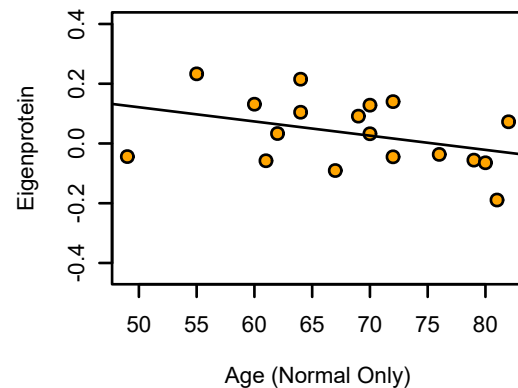

**bicor=-0.21, p=0.42  
cor=-0.21, p=0.42**

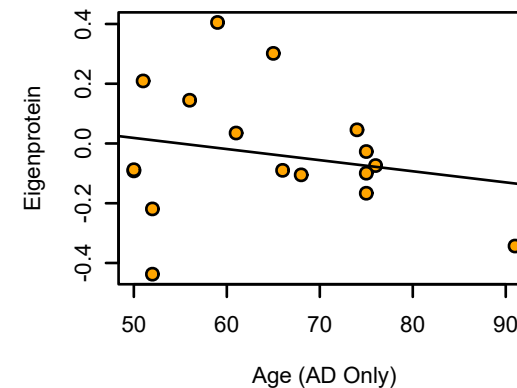

**M13 salmon.Plasma35**  
**Ambiguous**

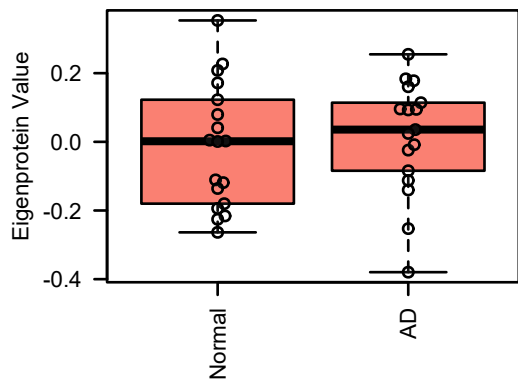

**MEsalmon.CSF 35 Samp. (Synthetic)**  
**ANOVA p: 0.24**

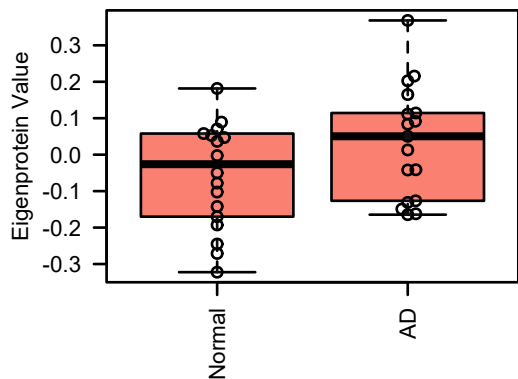

**MEsalmon.CSF (Synthetic)**  
**ANOVA p: 0.16**

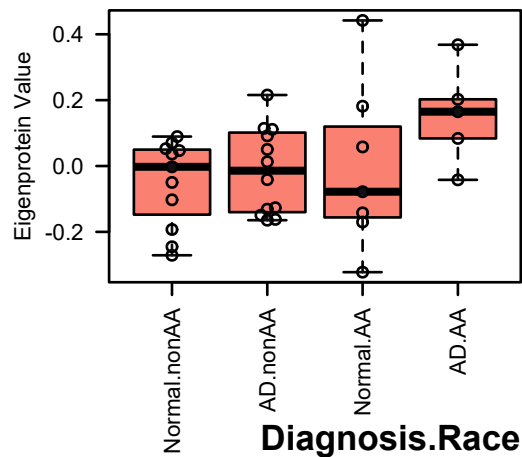

**MEsalmon.CSF (Synthetic)**  
**ANOVA p: 0.54**

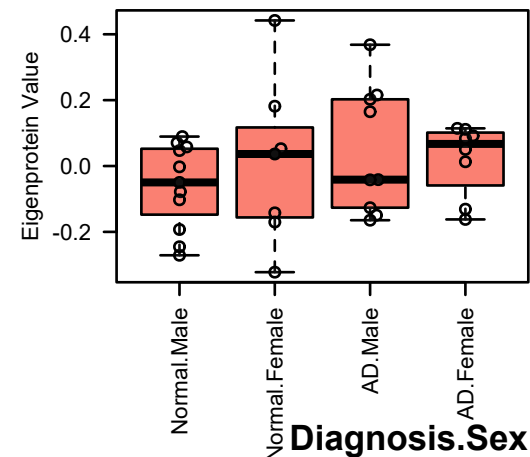

**bicor=-0.13, p=0.45**  
**cor=-0.12, p=0.49**

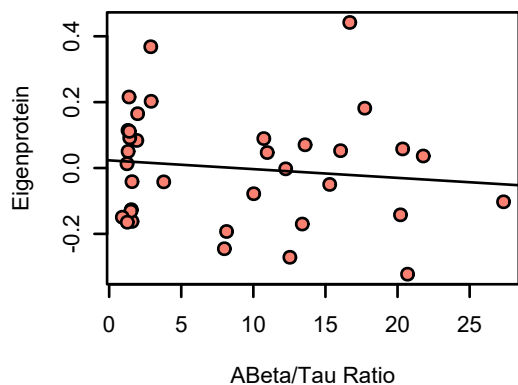

**bicor=-0.14, p=0.45**  
**cor=-0.36, p=0.047**

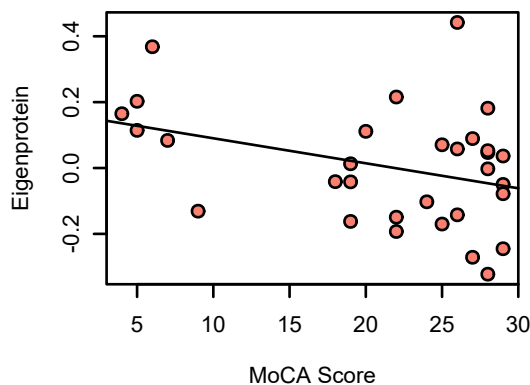

**bicor=-0.64, p=0.004**  
**cor=-0.57, p=0.014**

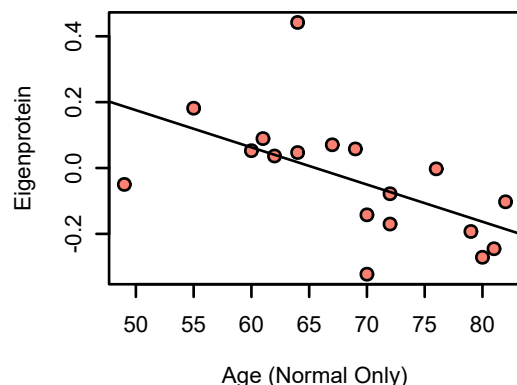

**bicor=-0.48, p=0.053**  
**cor=-0.48, p=0.051**

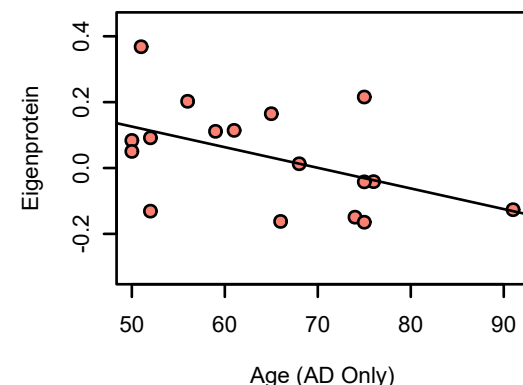

**M22 darkgreen.Plasma35**  
**Protein Activation Cascade/Proteolysis**

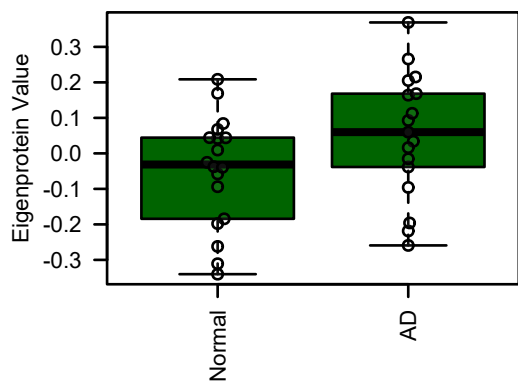

**MEdarkgreen.CSF 35 Samp. (Synthetic)**  
**ANOVA p: 0.018**

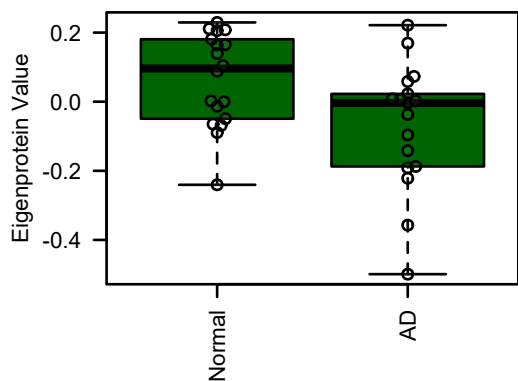

**MEdarkgreen.CSF (Synthetic)**  
**ANOVA p: 0.00078**

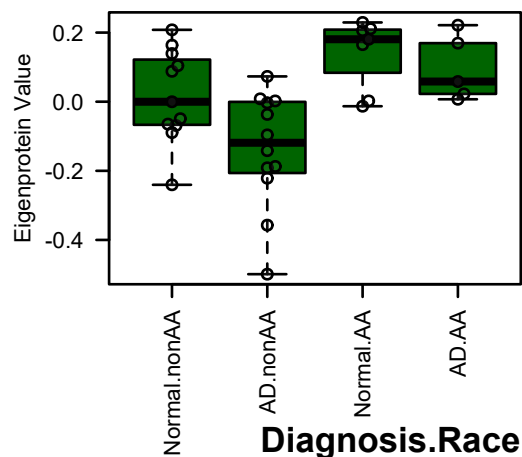

**MEdarkgreen.CSF (Synthetic)**  
**ANOVA p: 0.053**

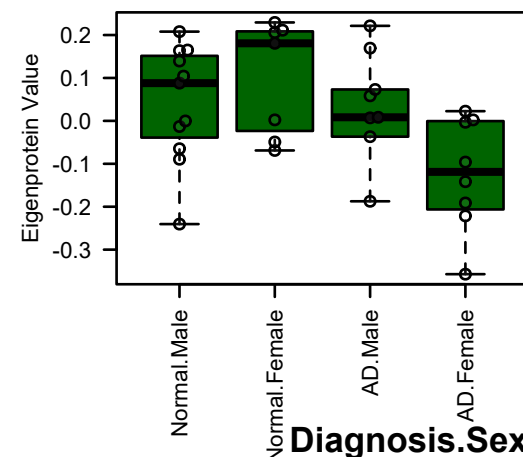

**bicor=0.47, p=0.004**  
**cor=0.46, p=0.0054**

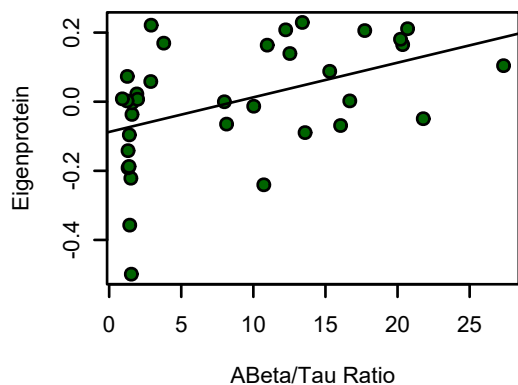

**bicor=0.24, p=0.2**  
**cor=0.2, p=0.28**

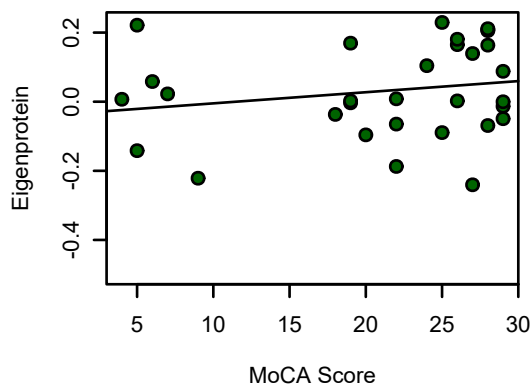

**bicor=0.16, p=0.53**  
**cor=0.14, p=0.58**

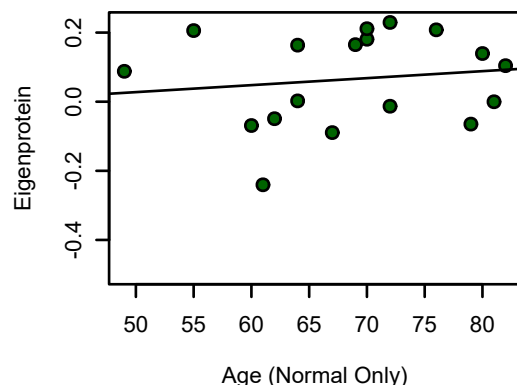

**bicor=0.074, p=0.78**  
**cor=-0.14, p=0.59**

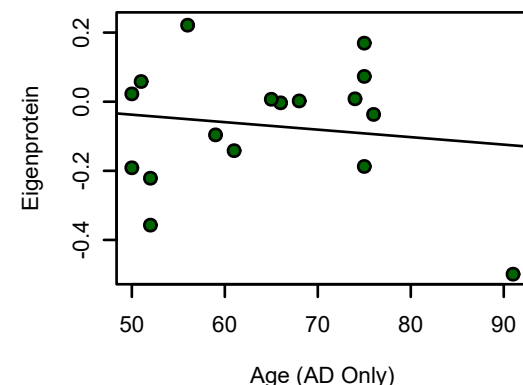

**M35 sienna3.Plasma35**  
**Ambiguous**

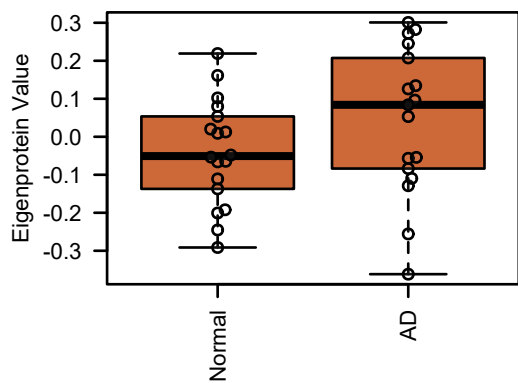

**MEsienna3.CSF 35 Samp. (Synthetic)**  
**ANOVA p: 0.02**

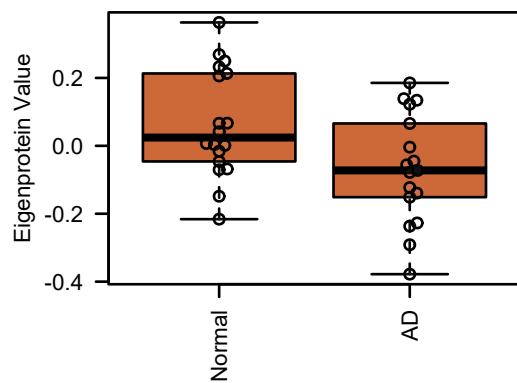

**MEsienna3.CSF (Synthetic)**  
**ANOVA p: 0.015**

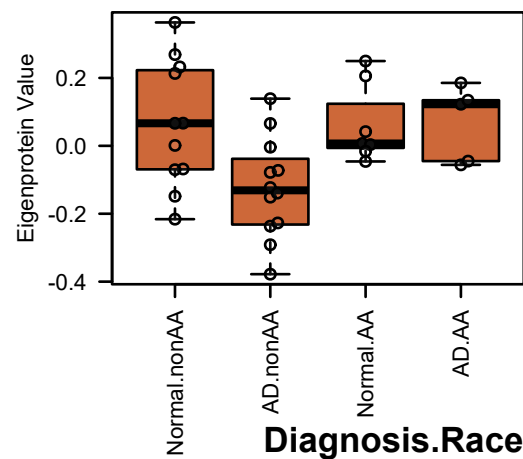

**MEsienna3.CSF (Synthetic)**  
**ANOVA p: 0.0046**

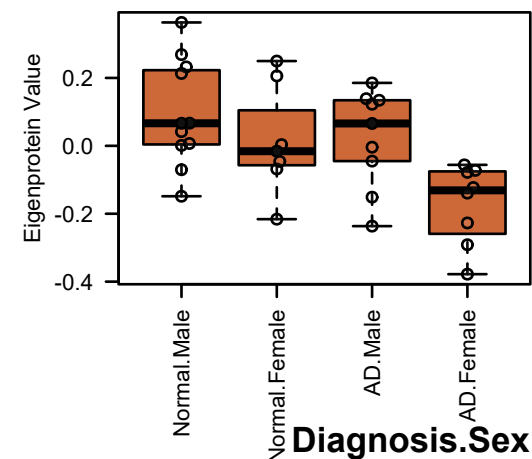

**bicor=0.33, p=0.054**  
**cor=0.33, p=0.053**

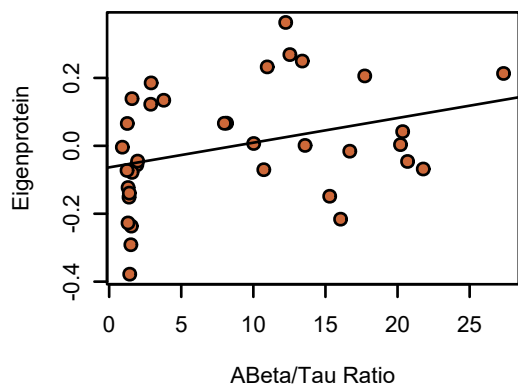

**bicor=0.17, p=0.36**  
**cor=0.22, p=0.23**

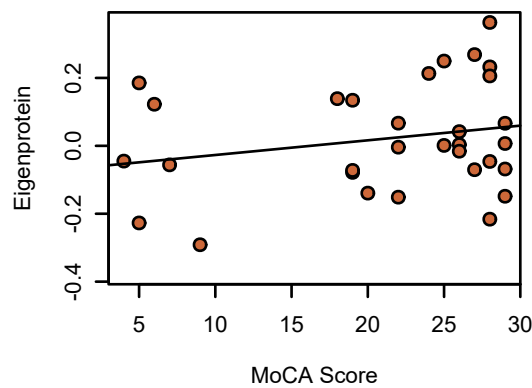

**bicor=0.5, p=0.035**  
**cor=0.53, p=0.024**

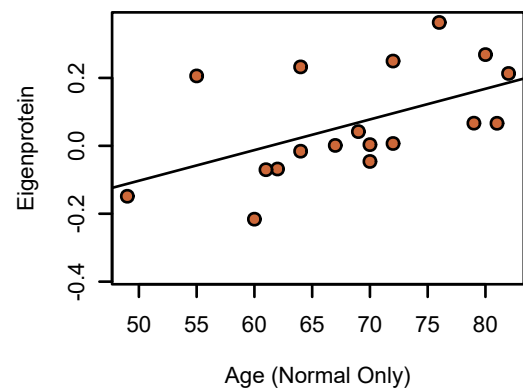

**bicor=0.17, p=0.52**  
**cor=0.15, p=0.57**

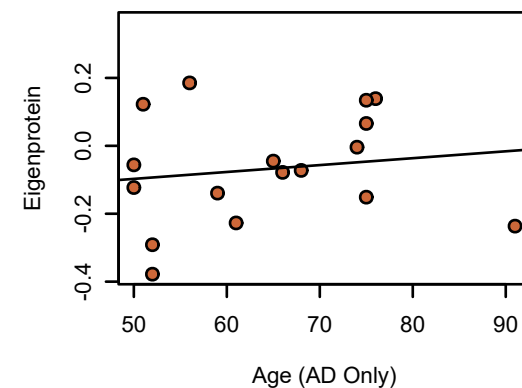

**M16 lightcyan.Plasma35**  
**Complement/Protein Activation Cascade**

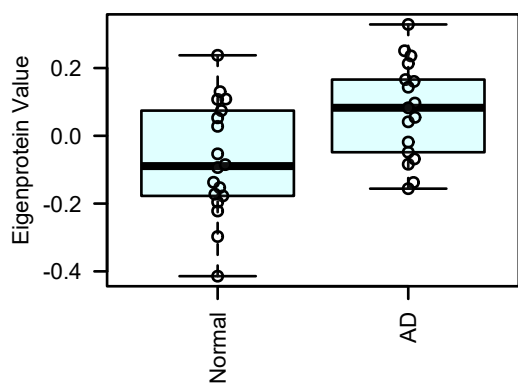

**MElightcyan.CSF 35 Samp. (Synthetic)**  
**ANOVA p: 0.025**

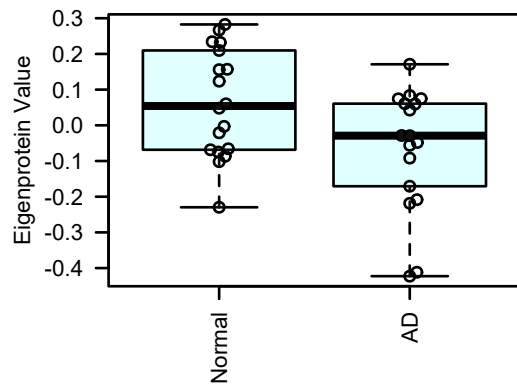

**MElightcyan.CSF (Synthetic)**  
**ANOVA p: 0.0076**

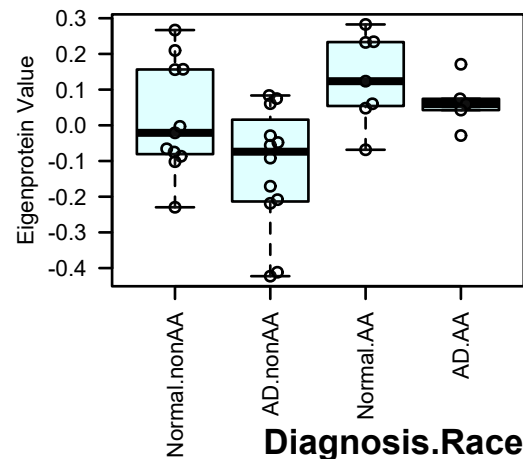

**MElightcyan.CSF (Synthetic)**  
**ANOVA p: 0.089**

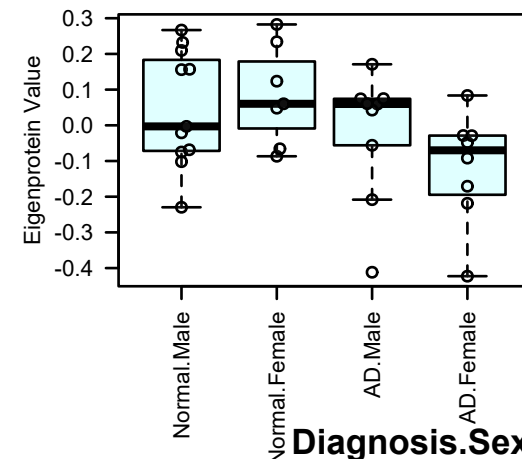

**bicor=0.45, p=0.0064**  
**cor=0.48, p=0.0035**

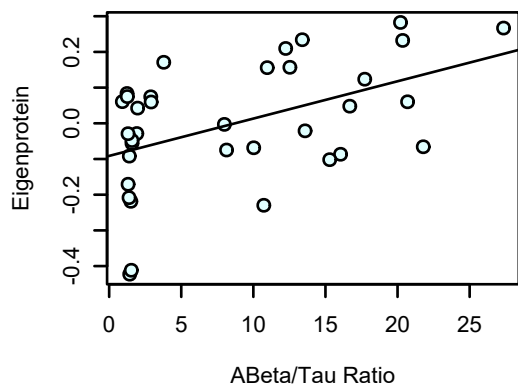

**bicor=0.19, p=0.3**  
**cor=0.16, p=0.39**

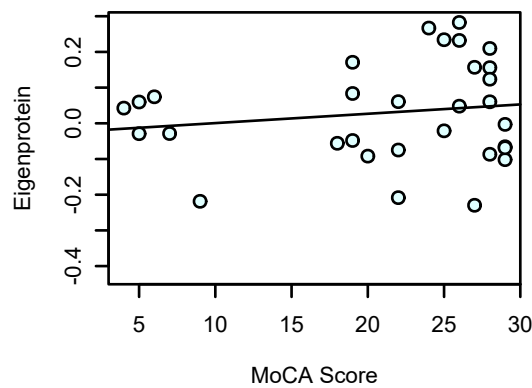

**bicor=0.4, p=0.1**  
**cor=0.41, p=0.091**

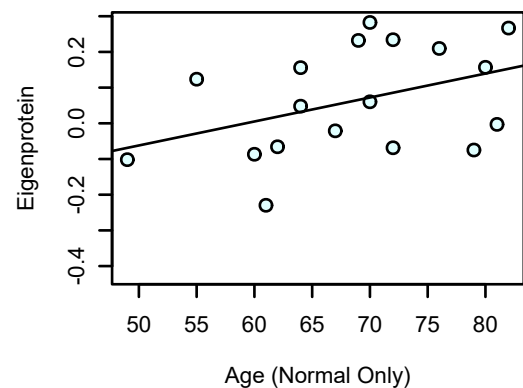

**bicor=0.074, p=0.78**  
**cor=-0.011, p=0.97**

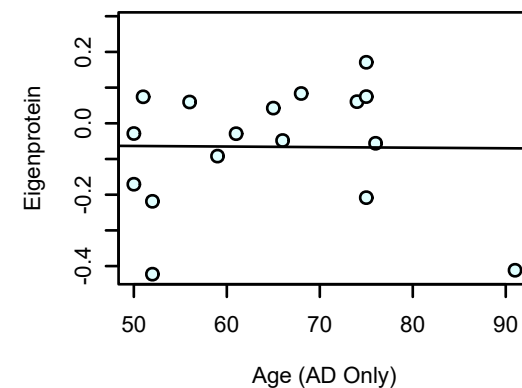

**M8 pink.Plasma35**  
**Protein Activation Cascade**

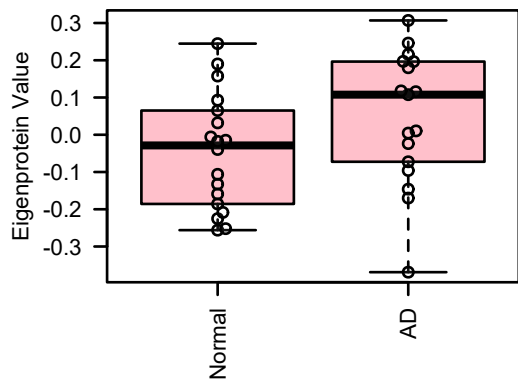

**MEpink.CSF 35 Samp. (Synthetic)**  
**ANOVA p: 0.0051**

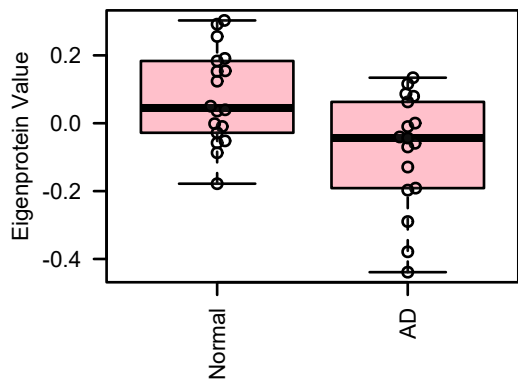

**MEpink.CSF (Synthetic)**  
**ANOVA p: 0.0035**

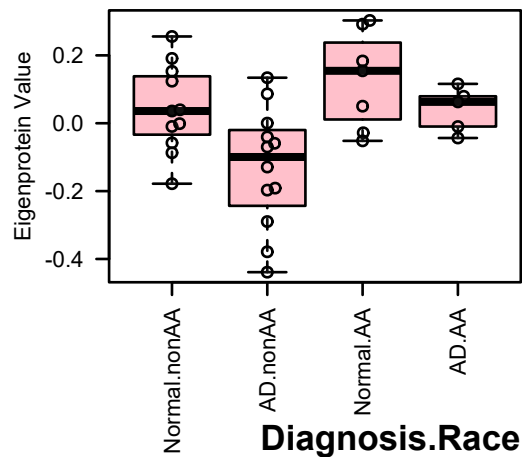

**MEpink.CSF (Synthetic)**  
**ANOVA p: 0.035**

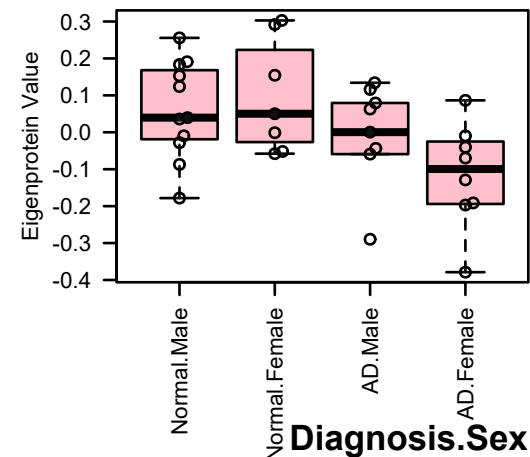

**bicor=0.47, p=0.0039**  
**cor=0.47, p=0.0044**

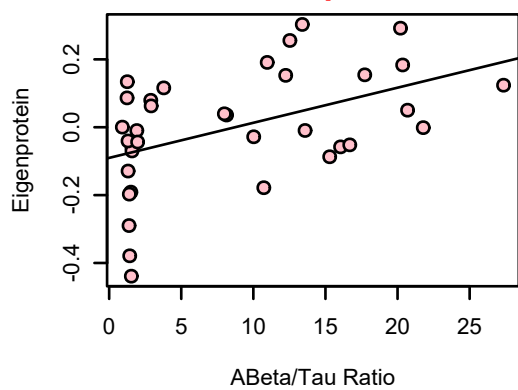

**bicor=0.23, p=0.21**  
**cor=0.23, p=0.21**

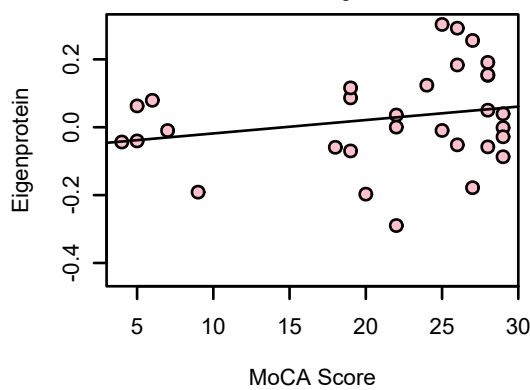

**bicor=0.39, p=0.11**  
**cor=0.42, p=0.083**

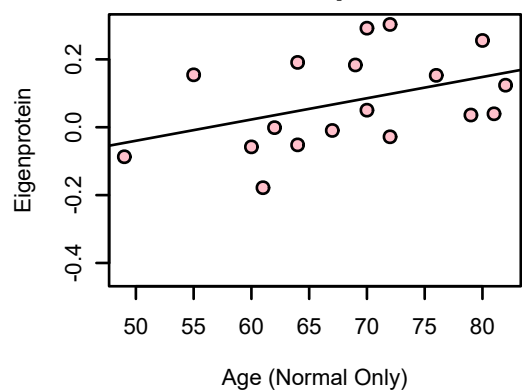

**bicor=-0.028, p=0.92**  
**cor=-0.12, p=0.65**

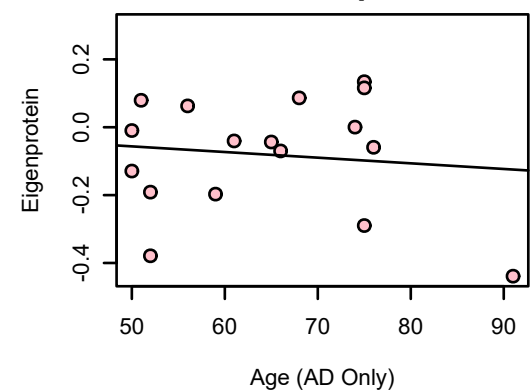

**M17 grey60.Plasma35**  
**Glycosylation**

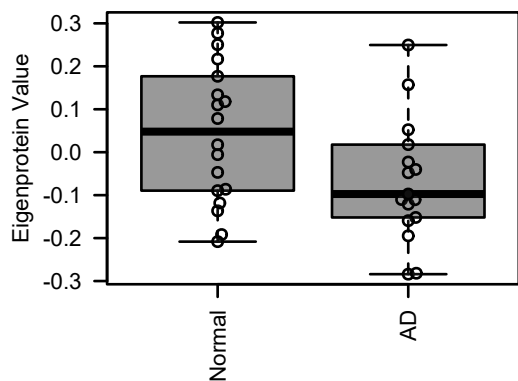

**MEgrey60.CSF 35 Samp. (Synthetic)**  
**ANOVA p: 0.73**

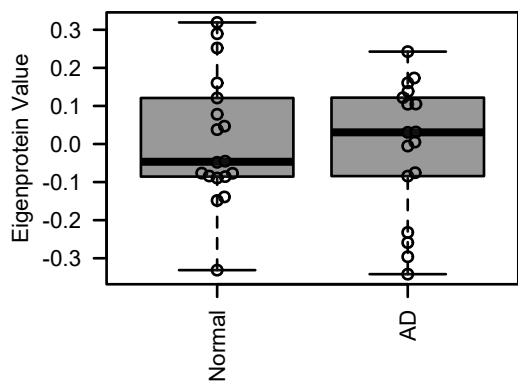

**MEgrey60.CSF (Synthetic)**  
**ANOVA p: 0.0029**

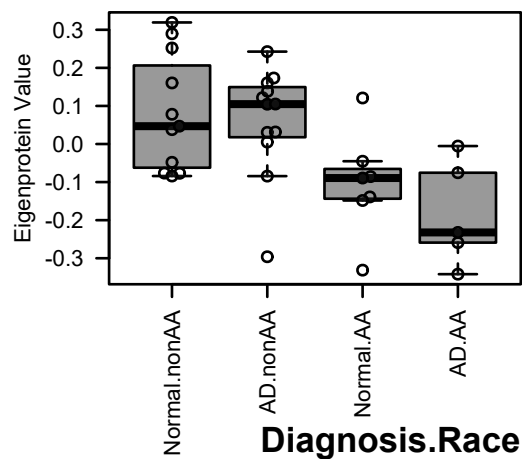

**MEgrey60.CSF (Synthetic)**  
**ANOVA p: 0.16**

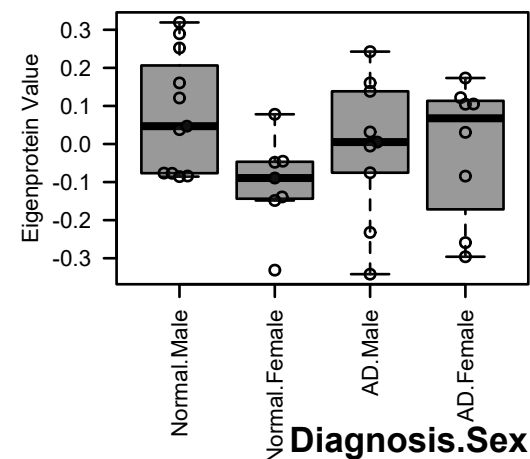

**bicor=-0.17, p=0.34**  
**cor=-0.13, p=0.46**

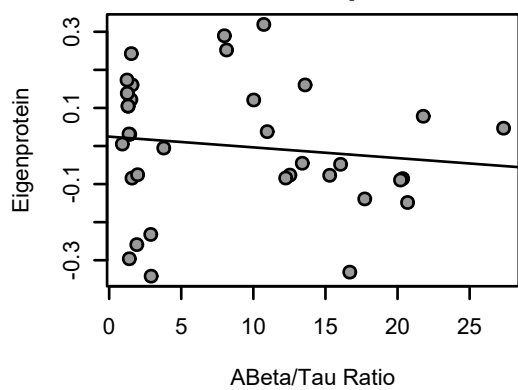

**bicor=0.034, p=0.85**  
**cor=0.25, p=0.17**

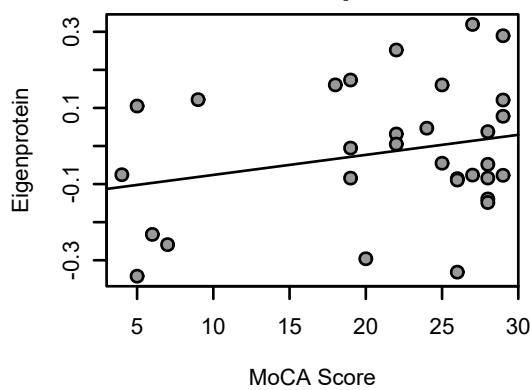

**bicor=0.23, p=0.35**  
**cor=0.27, p=0.28**

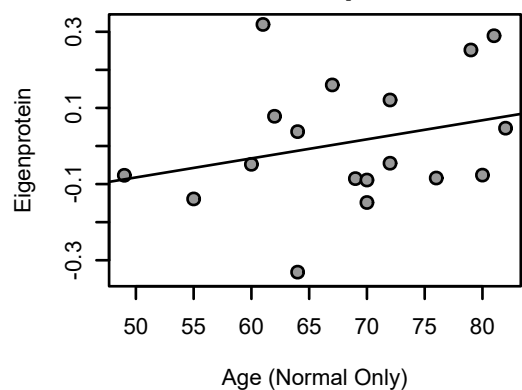

**bicor=0.52, p=0.032**  
**cor=0.53, p=0.029**

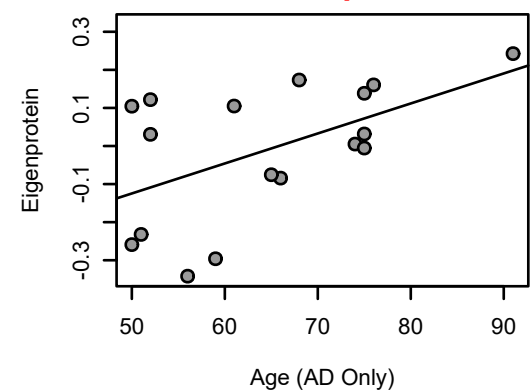

**M24 darkgrey.Plasma35  
Endocytosis**

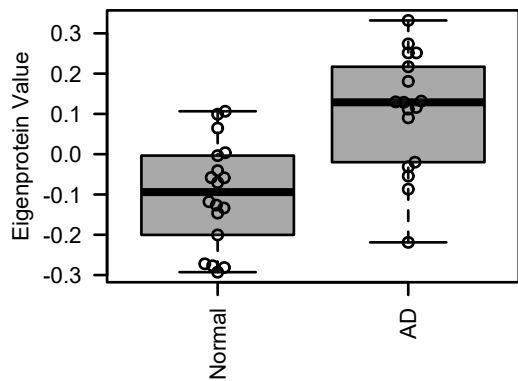

**MEdarkgrey.CSF 35 Samp. (Synthetic)  
ANOVA p: 0.7**

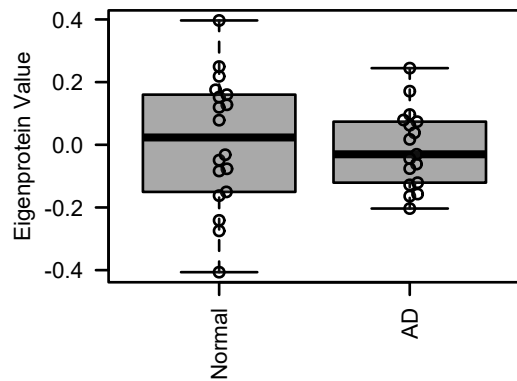

**MEdarkgrey.CSF (Synthetic)  
ANOVA p: 0.019**

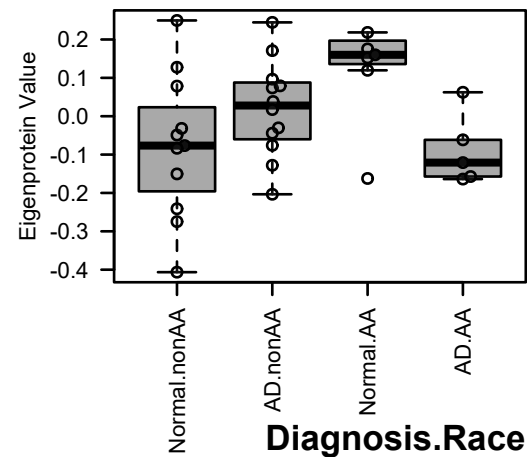

**MEdarkgrey.CSF (Synthetic)  
ANOVA p: 0.33**

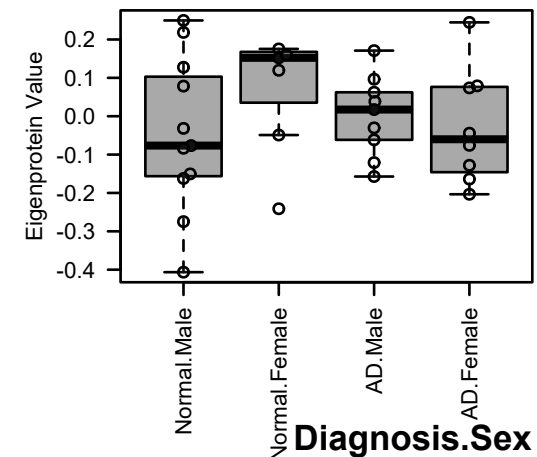

**bicor=0.25, p=0.15  
cor=0.25, p=0.15**

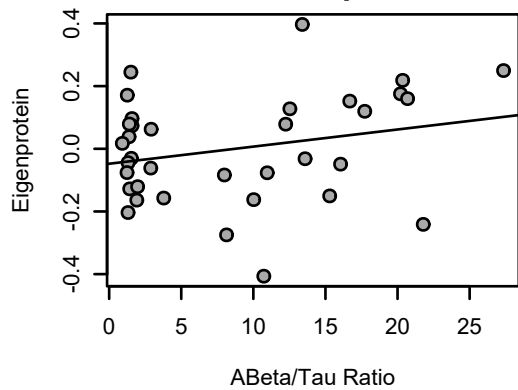

**bicor=-0.015, p=0.94  
cor=0.092, p=0.62**

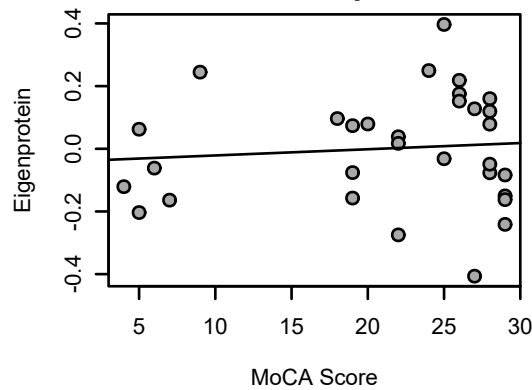

**bicor=0.28, p=0.26  
cor=0.27, p=0.28**

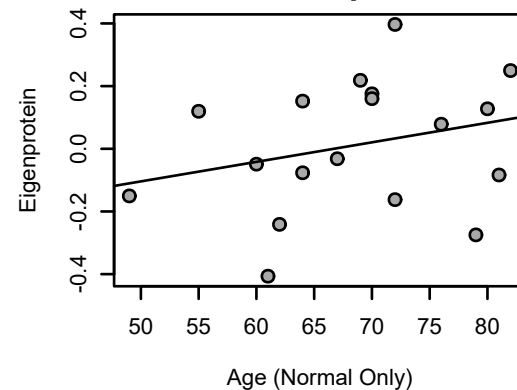

**bicor=0.14, p=0.58  
cor=0.12, p=0.65**

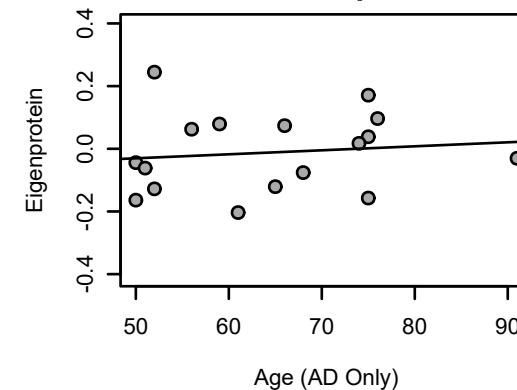

**M33 darkolivegreen.Plasma35  
Adhesion/ECM/Wound Response**

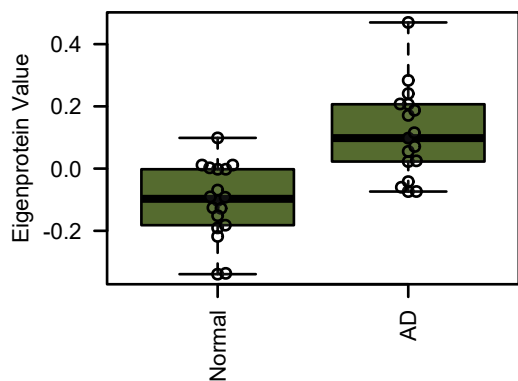

**MEdarkolivegreen.CSF 35 Samp. (Synthetic)  
ANOVA p: 0.38**

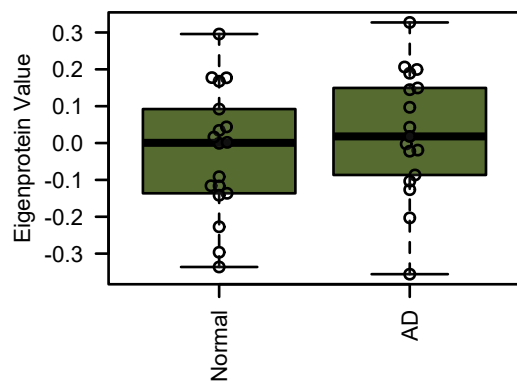

**MEdarkolivegreen.CSF (Synthetic)  
ANOVA p: 0.12**

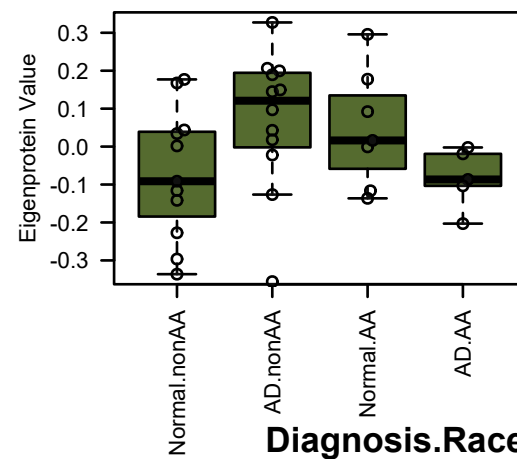

**MEdarkolivegreen.CSF (Synthetic)  
ANOVA p: 0.0075**

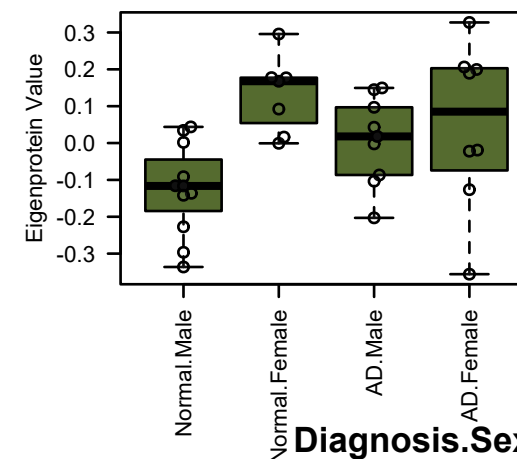

**bicor=0.0093, p=0.96  
cor=0.017, p=0.92**

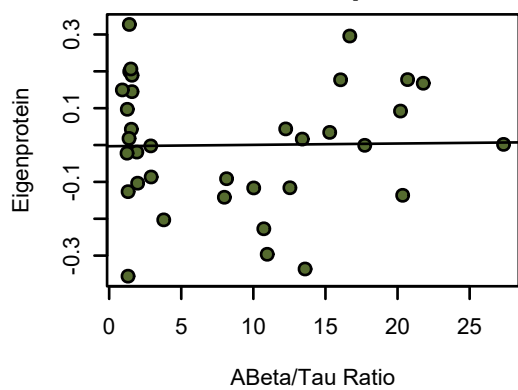

**bicor=-0.1, p=0.59  
cor=0.098, p=0.6**

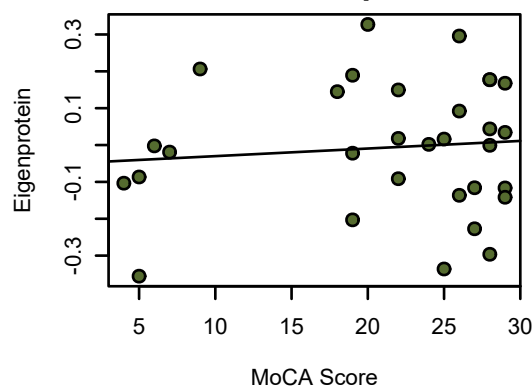

**bicor=-0.18, p=0.48  
cor=-0.18, p=0.47**

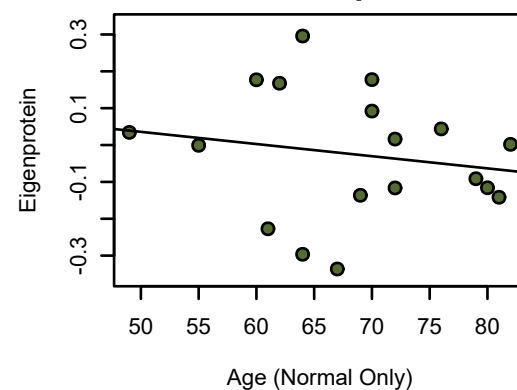

**bicor=0.027, p=0.92  
cor=0.022, p=0.93**

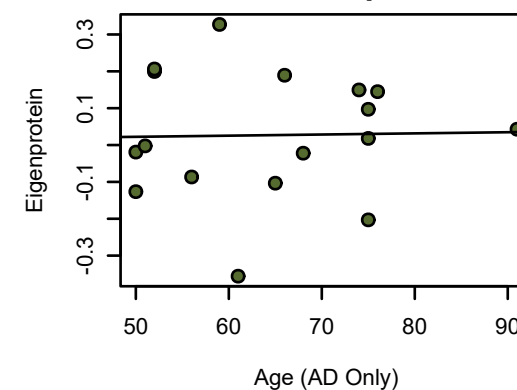

**M10 purple.Plasma35  
Ambiguous**

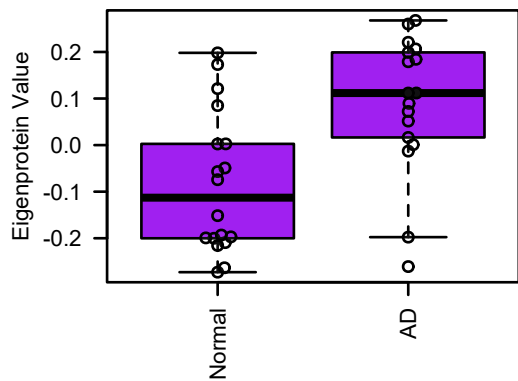

**MEpurple.CSF 35 Samp. (Synthetic)  
ANOVA p: 0.59**

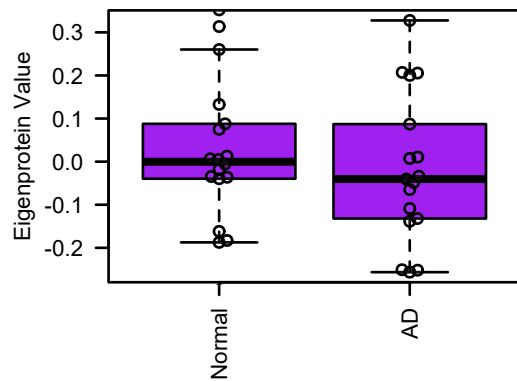

**MEpurple.CSF (Synthetic)  
ANOVA p: 0.12**

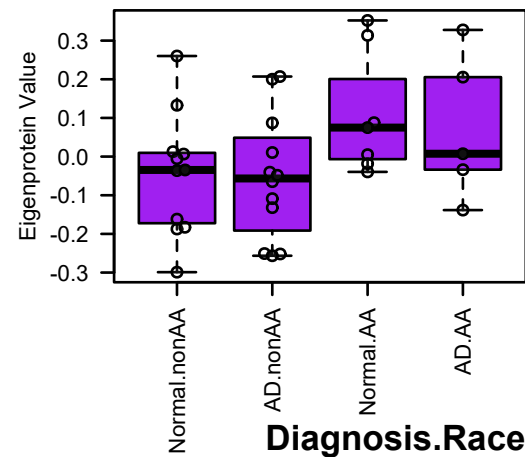

**MEpurple.CSF (Synthetic)  
ANOVA p: 0.25**

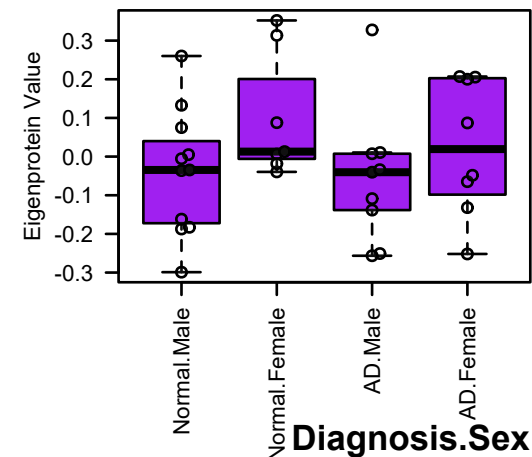

**bicor=0.26, p=0.13  
cor=0.25, p=0.15**

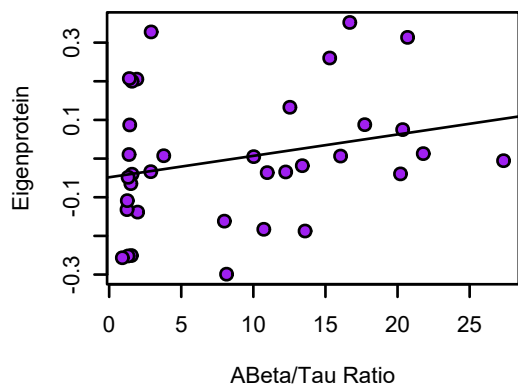

**bicor=0.084, p=0.65  
cor=0.064, p=0.73**

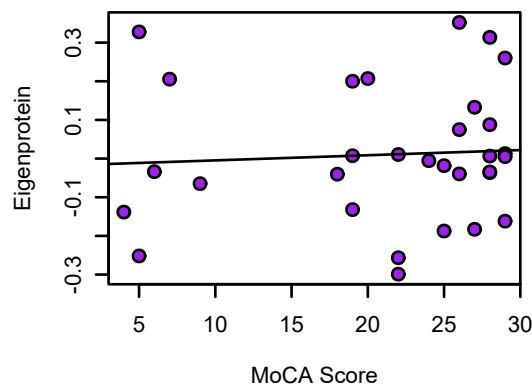

**bicor=-0.34, p=0.16  
cor=-0.36, p=0.14**

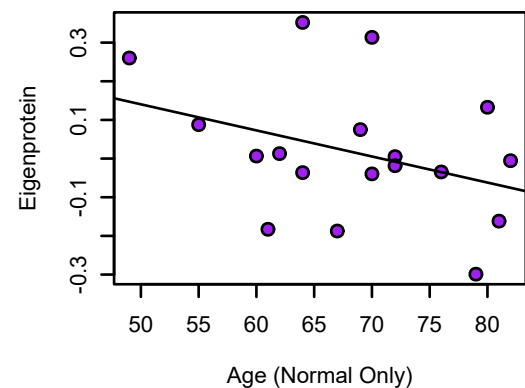

**bicor=-0.48, p=0.053  
cor=-0.48, p=0.051**

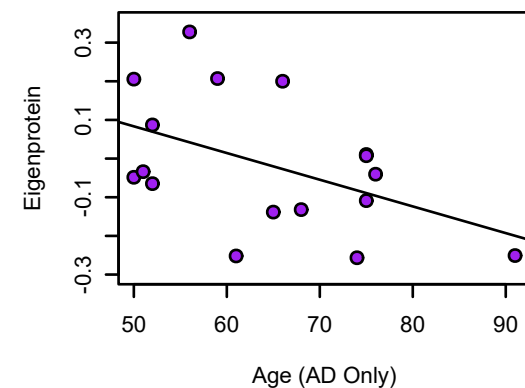

**M6 red.Plasma35  
Axon Guidance/Nervous System Dev**

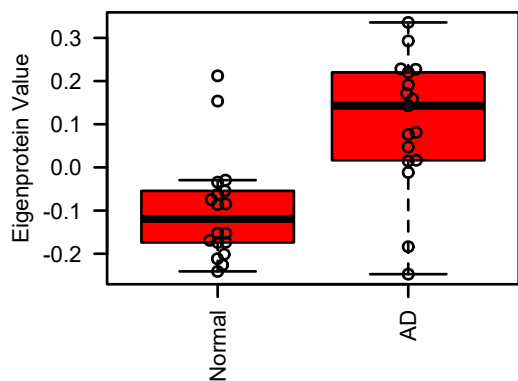

**MEred.CSF 35 Samp. (Synthetic)  
ANOVA p: 0.61**

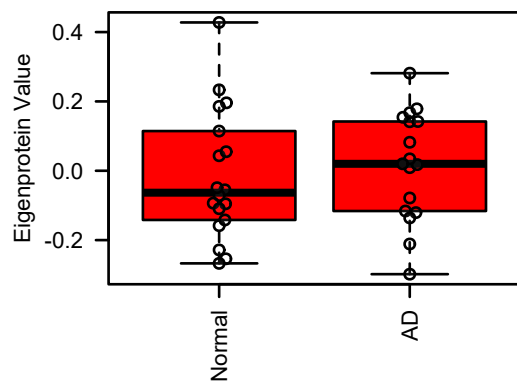

**MEred.CSF (Synthetic)  
ANOVA p: 0.012**

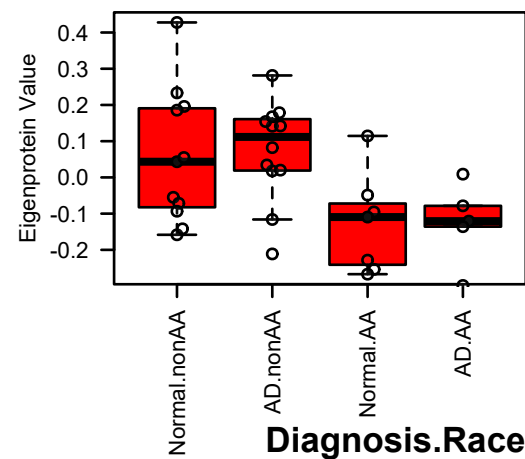

**MEred.CSF (Synthetic)  
ANOVA p: 0.26**

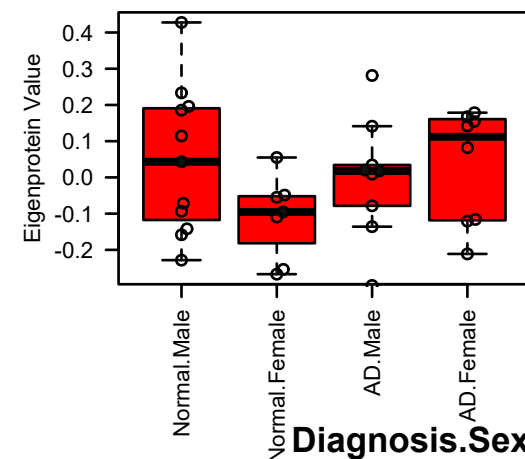

**bicor=-0.34, p=0.048  
cor=-0.32, p=0.061**

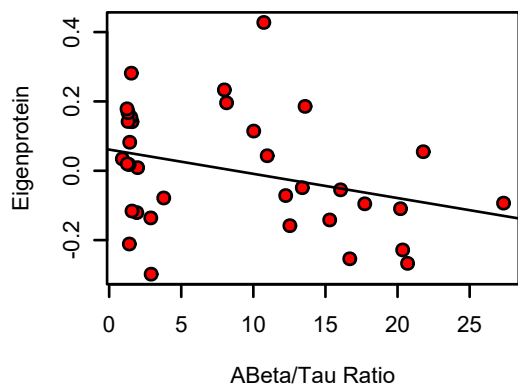

**bicor=-0.11, p=0.57  
cor=0.045, p=0.81**

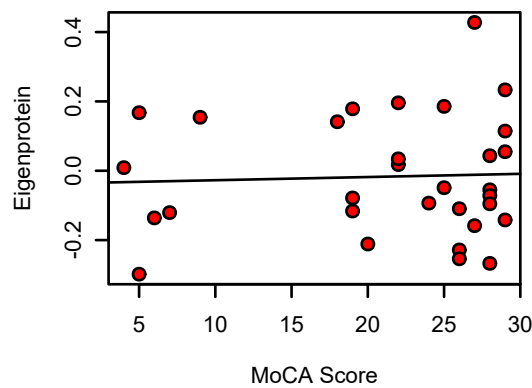

**bicor=0.095, p=0.71  
cor=0.086, p=0.73**

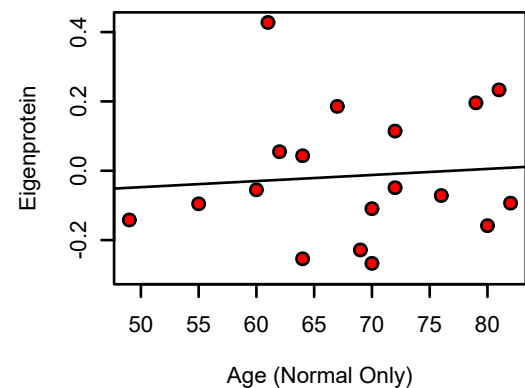

**bicor=0.34, p=0.18  
cor=0.37, p=0.14**

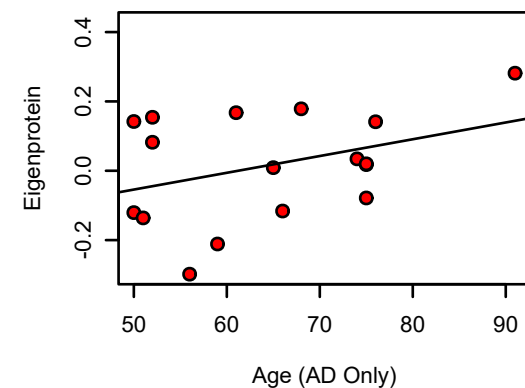

**M12 tan.Plasma35  
Matrisome**

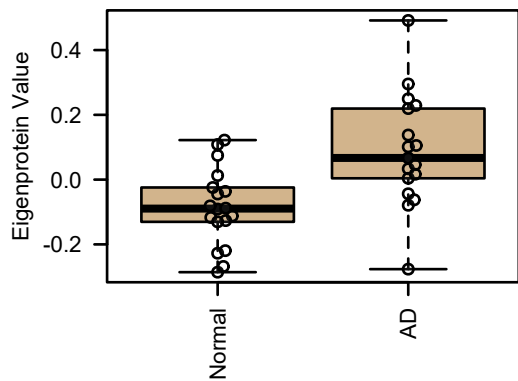

**MEtan.CSF 35 Samp. (Synthetic)  
ANOVA p: 0.46**

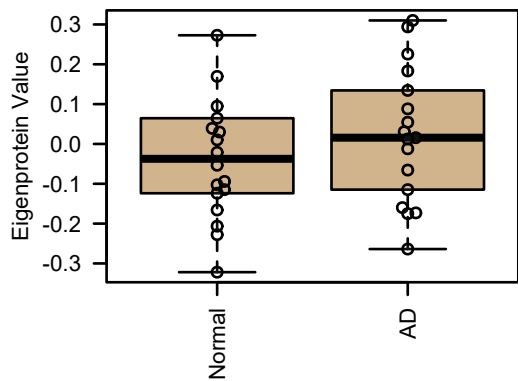

**MEtan.CSF (Synthetic)  
ANOVA p: 0.22**

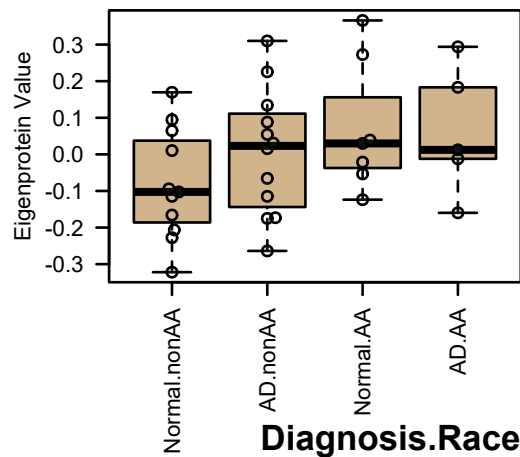

**MEtan.CSF (Synthetic)  
ANOVA p: 0.084**

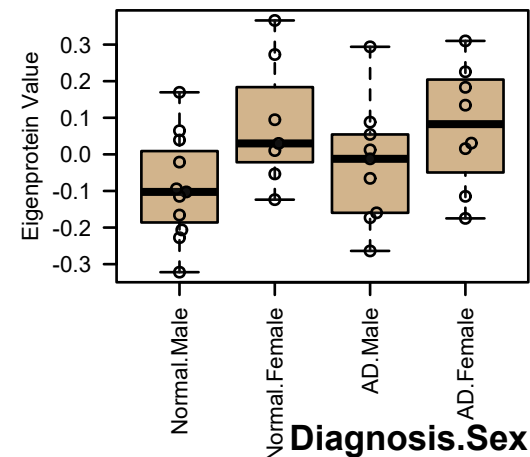

**bicor=0.085, p=0.63  
cor=0.1, p=0.57**

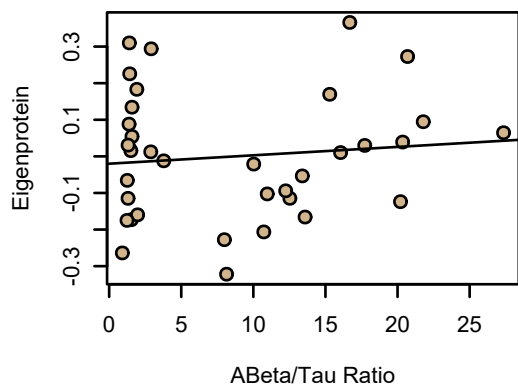

**bicor=-0.064, p=0.73  
cor=-0.097, p=0.6**

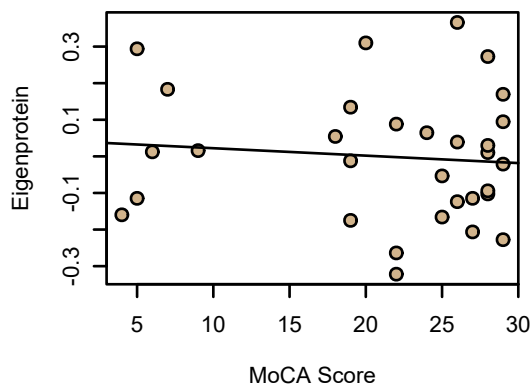

**bicor=-0.43, p=0.076  
cor=-0.41, p=0.091**

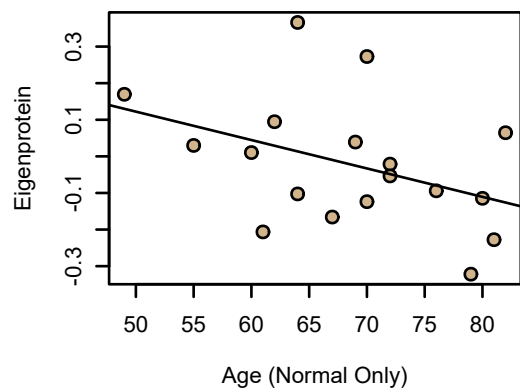

**bicor=-0.52, p=0.031  
cor=-0.52, p=0.032**

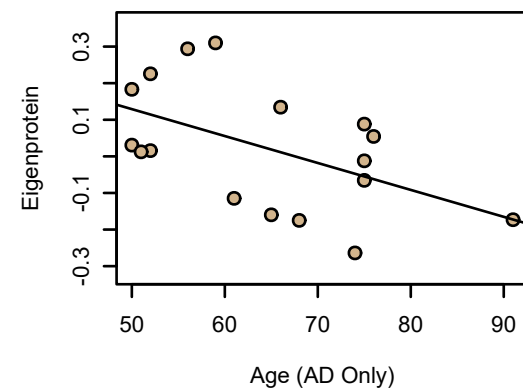

**M5 green.Plasma35  
ECM/IGF-PDGF Binding**

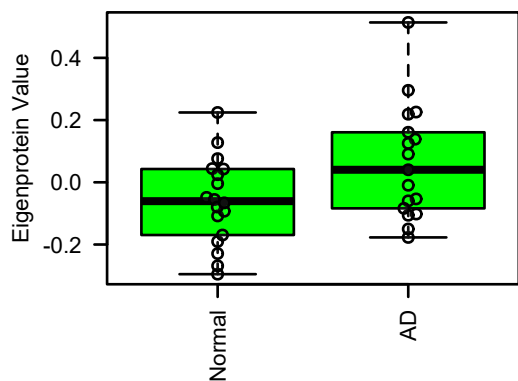

**MEgreen.CSF 35 Samp. (Synthetic)  
ANOVA p: 0.8**

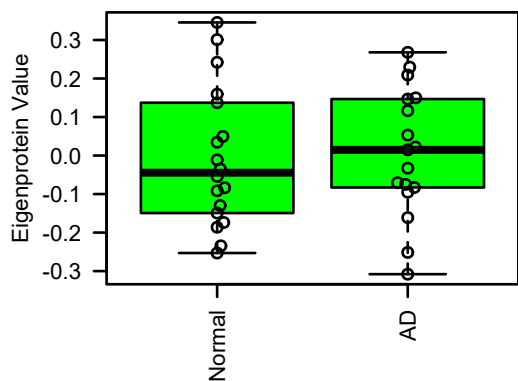

**MEgreen.CSF (Synthetic)  
ANOVA p: 0.077**

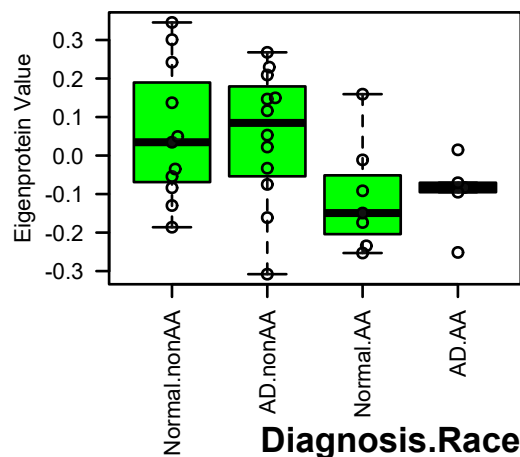

**MEgreen.CSF (Synthetic)  
ANOVA p: 0.14**

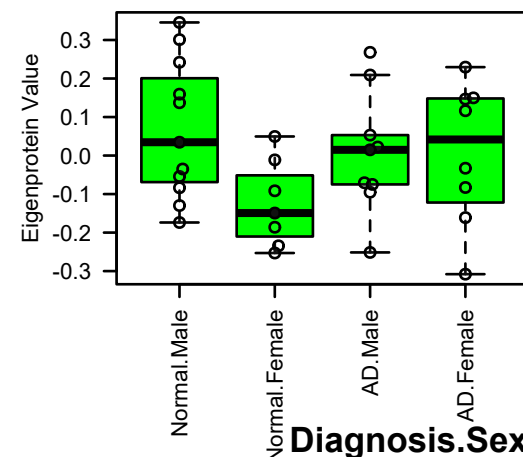

**bicor=-0.27, p=0.12  
cor=-0.27, p=0.12**

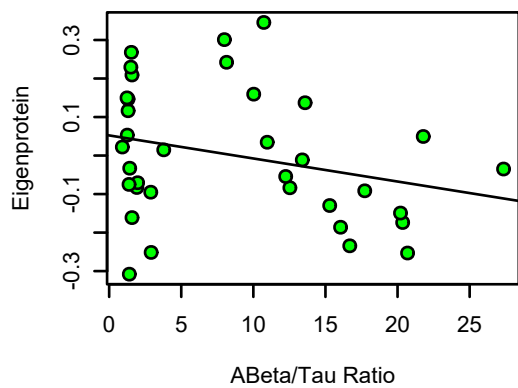

**bicor=-0.12, p=0.52  
cor=0.024, p=0.9**

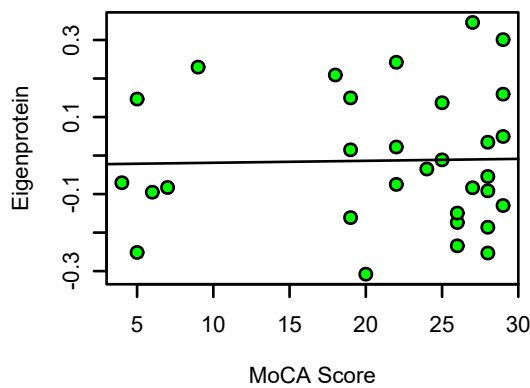

**bicor=0.25, p=0.32  
cor=0.26, p=0.3**

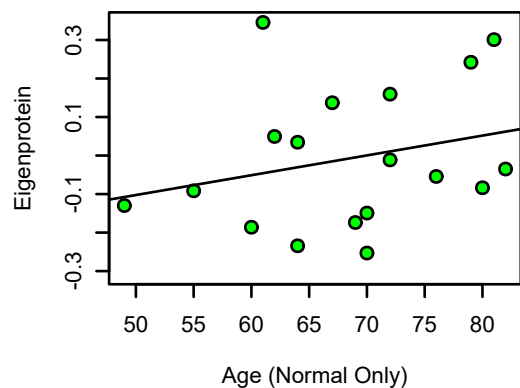

**bicor=0.35, p=0.17  
cor=0.36, p=0.16**

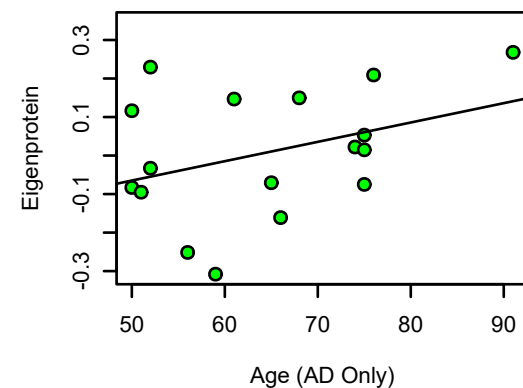



**M18 lightgreen.Plasma35**  
**Cellular Adhesion/ECM Organization**

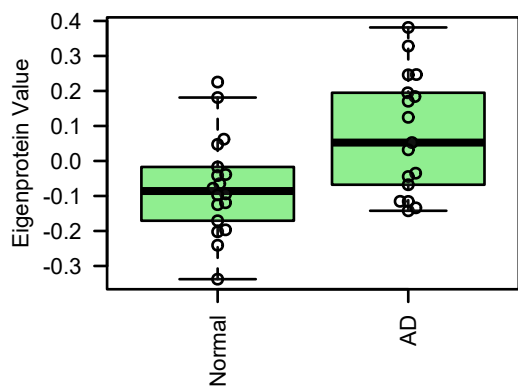

**MElightgreen.CSF 35 Samp. (Synthetic)**  
**ANOVA p: 0.97**

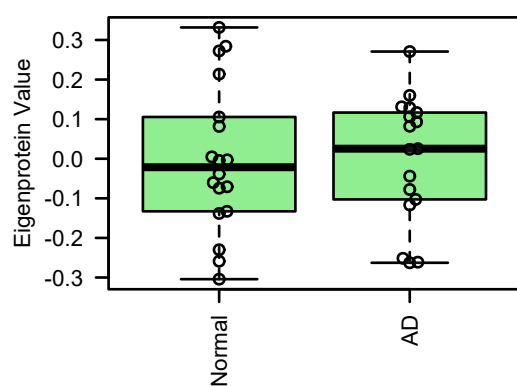

**MElightgreen.CSF (Synthetic)**  
**ANOVA p: 0.13**

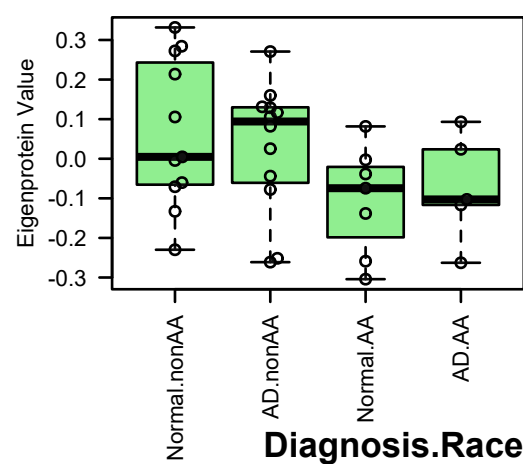

**MElightgreen.CSF (Synthetic)**  
**ANOVA p: 0.18**

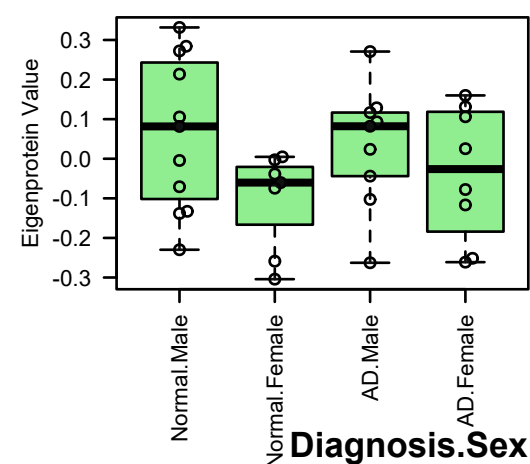

**bicor=-0.25, p=0.14**  
**cor=-0.25, p=0.15**

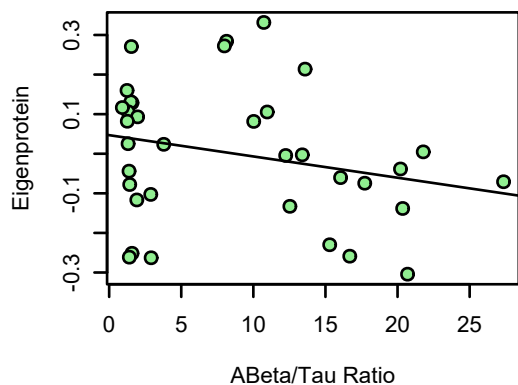

**bicor=-0.024, p=0.9**  
**cor=0.03, p=0.87**

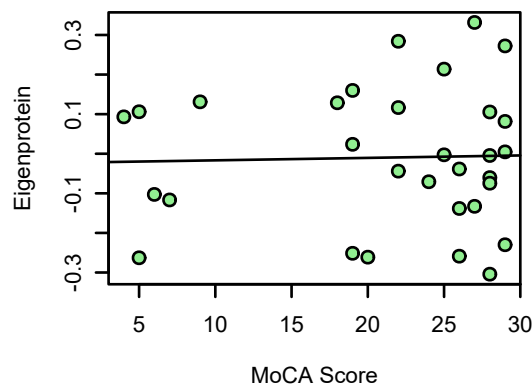

**bicor=0.23, p=0.35**  
**cor=0.25, p=0.32**

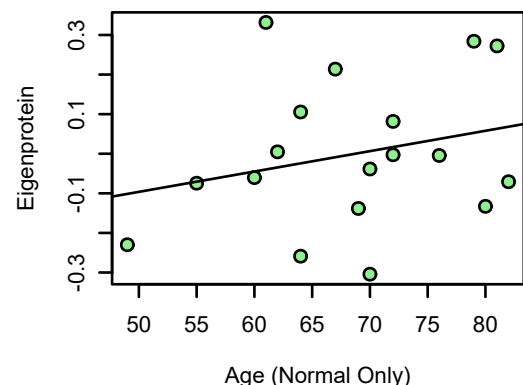

**bicor=0.53, p=0.03**  
**cor=0.52, p=0.032**

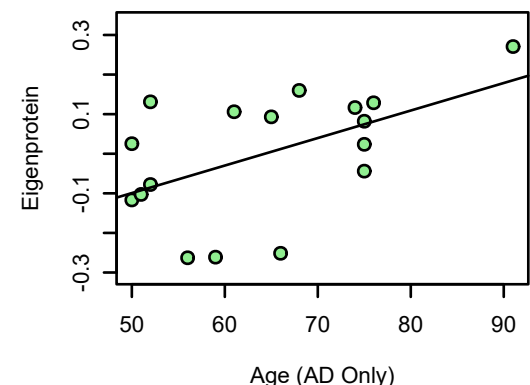

**M34 darkmagenta.Plasma35**  
**Carbohydrate Binding**

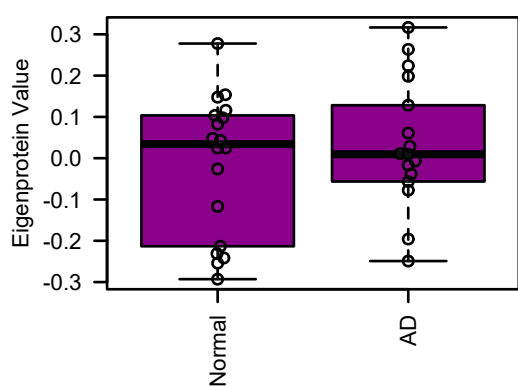

**MEdarkmagenta.CSF 35 Samp. (Synthetic)**  
**ANOVA p: 0.0072**

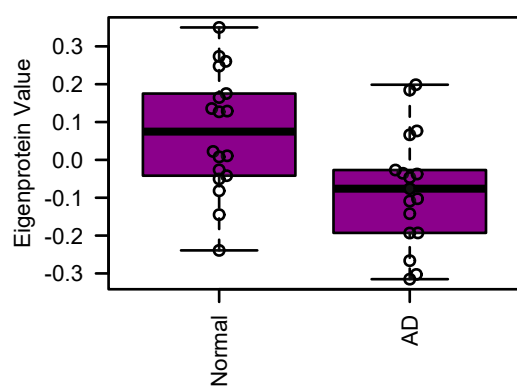

**MEdarkmagenta.CSF (Synthetic)**  
**ANOVA p: 0.053**

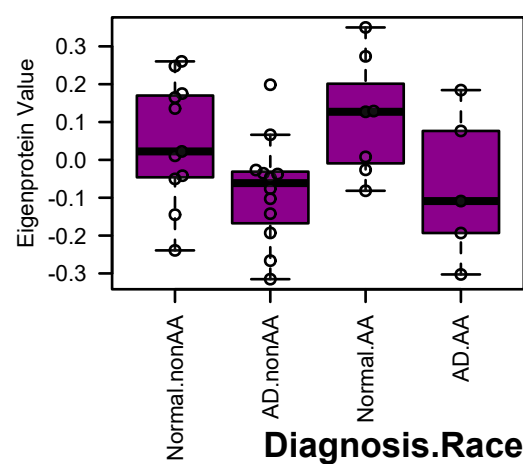

**MEdarkmagenta.CSF (Synthetic)**  
**ANOVA p: 0.0049**

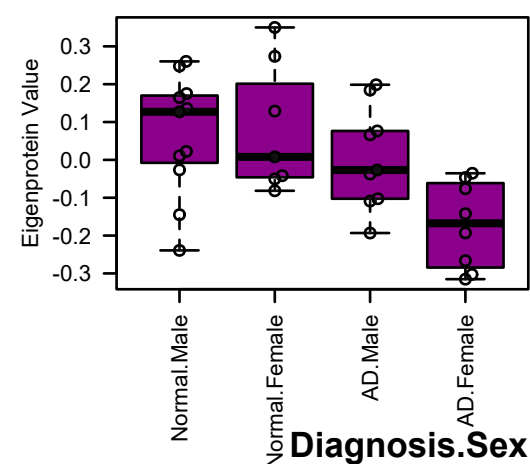

**bicor=0.44, p=0.0086**  
**cor=0.44, p=0.0082**

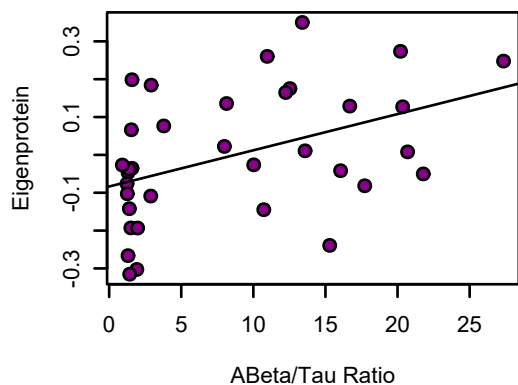

**bicor=0.17, p=0.37**  
**cor=0.4, p=0.026**

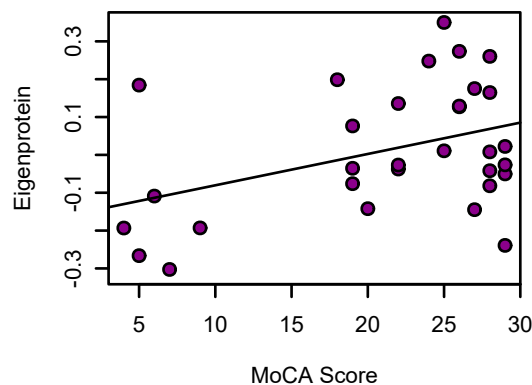

**bicor=0.61, p=0.0074**  
**cor=0.63, p=0.0051**

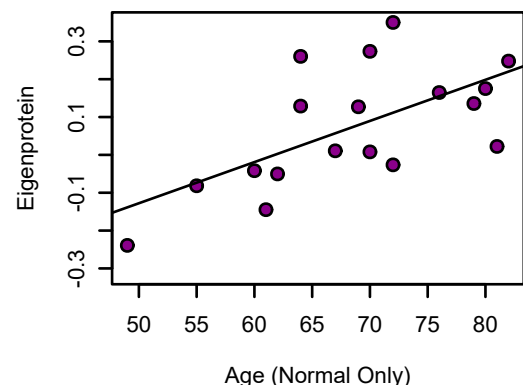

**bicor=0.55, p=0.021**  
**cor=0.54, p=0.025**

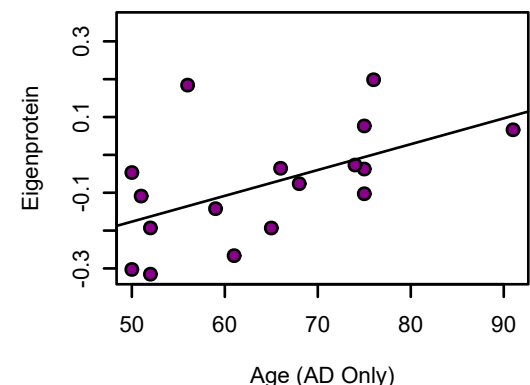

**M7 black.Plasma35  
TNF/Ephrin Signaling**

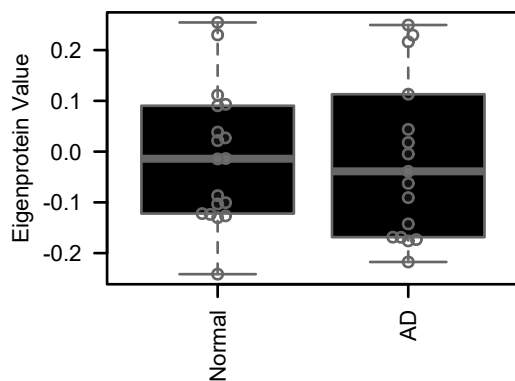

**MEblack.CSF 35 Samp. (Synthetic)  
ANOVA p: 0.75**

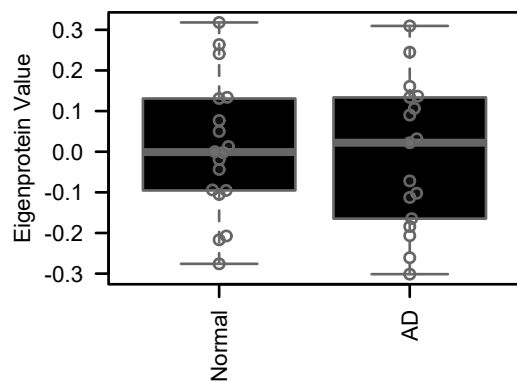

**MEblack.CSF (Synthetic)  
ANOVA p: 0.036**

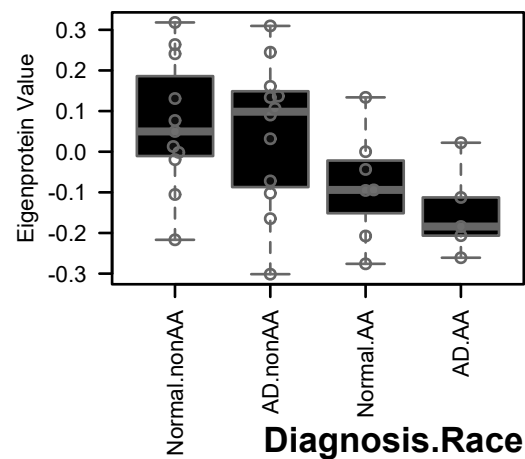

**MEblack.CSF (Synthetic)  
ANOVA p: 0.16**

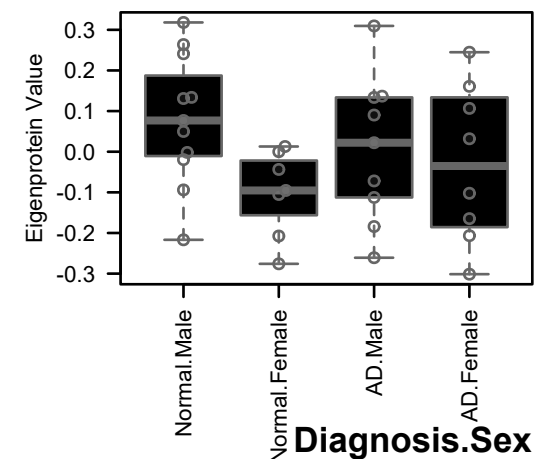

**bicor=-0.17, p=0.32  
cor=-0.17, p=0.33**

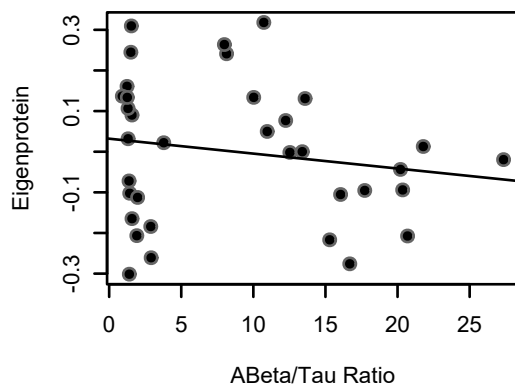

**bicor=0.062, p=0.74  
cor=0.17, p=0.36**

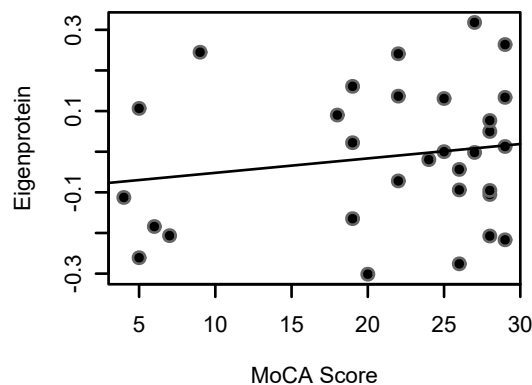

**bicor=0.42, p=0.079  
cor=0.42, p=0.083**

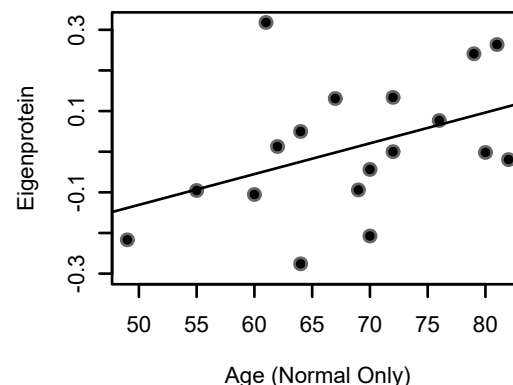

**bicor=0.52, p=0.033  
cor=0.53, p=0.029**

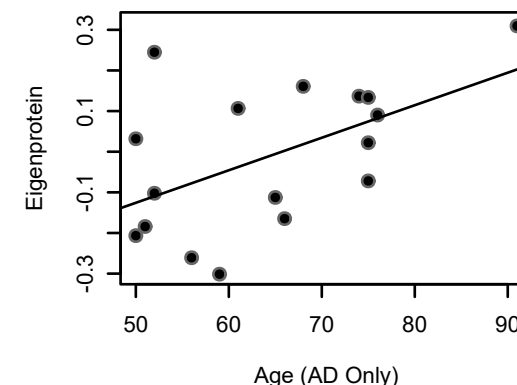

**M23 darkturquoise.Plasma35  
Carbohydrate Binding/ECM**

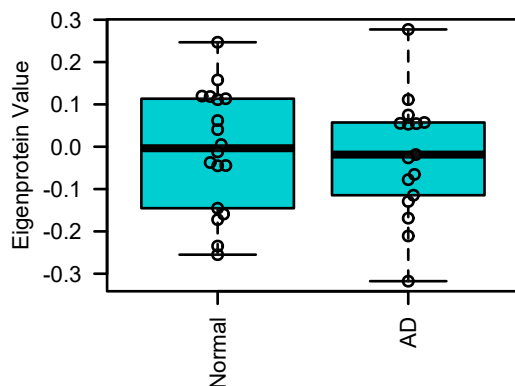

**MEdarkturquoise.CSF 35 Samp. (Synthetic)  
ANOVA p: 0.46**

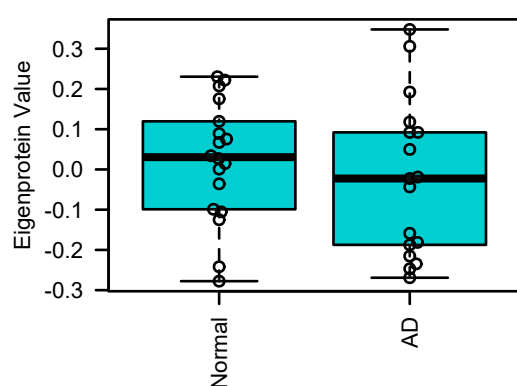

**MEdarkturquoise.CSF (Synthetic)  
ANOVA p: 0.85**

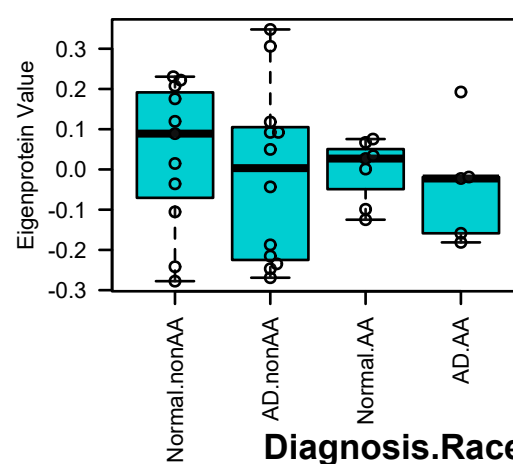

**MEdarkturquoise.CSF (Synthetic)  
ANOVA p: 0.011**

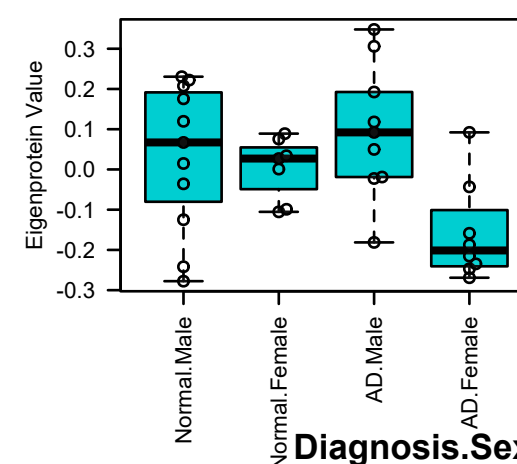

**bicor=0.14, p=0.41  
cor=0.15, p=0.39**

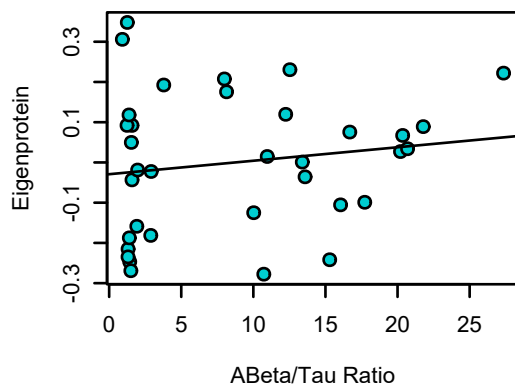

**bicor=0.099, p=0.6  
cor=0.32, p=0.079**

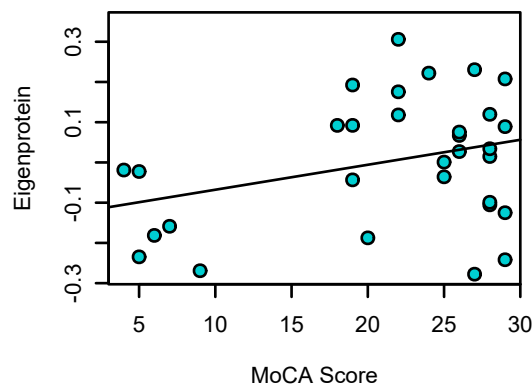

**bicor=0.8, p=5.8e-05  
cor=0.81, p=4.6e-05**

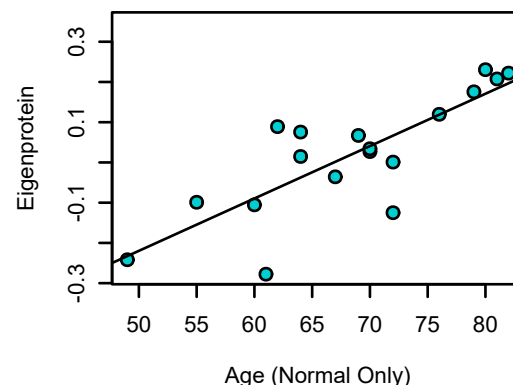

**bicor=0.81, p=8.7e-05  
cor=0.77, p=3e-04**

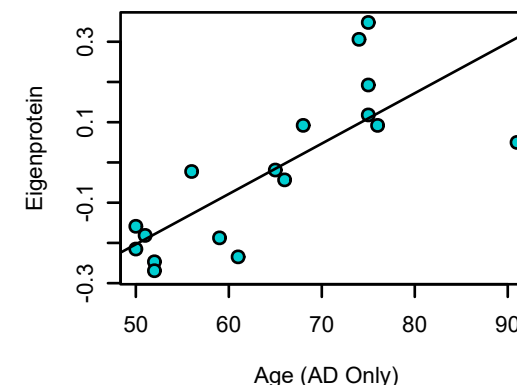

**M20 royalblue.Plasma35  
Digestion**

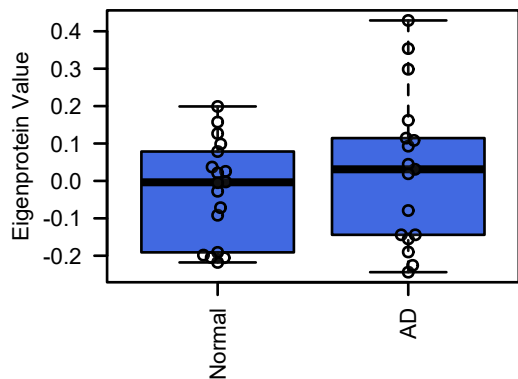

**MEroyalblue.CSF 35 Samp. (Synthetic)  
ANOVA p: 0.32**

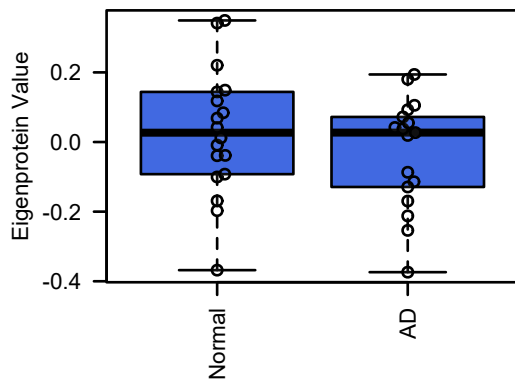

**MEroyalblue.CSF (Synthetic)  
ANOVA p: 0.7**

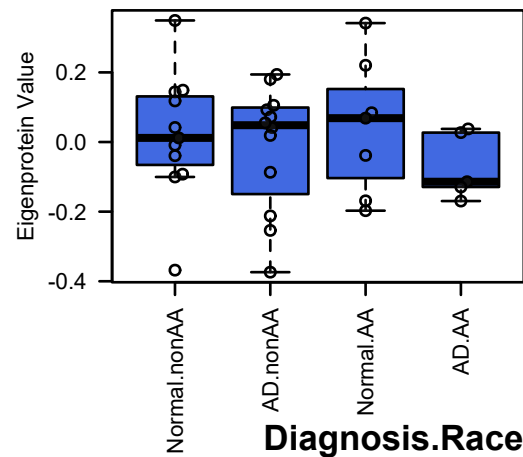

**MEroyalblue.CSF (Synthetic)  
ANOVA p: 0.68**

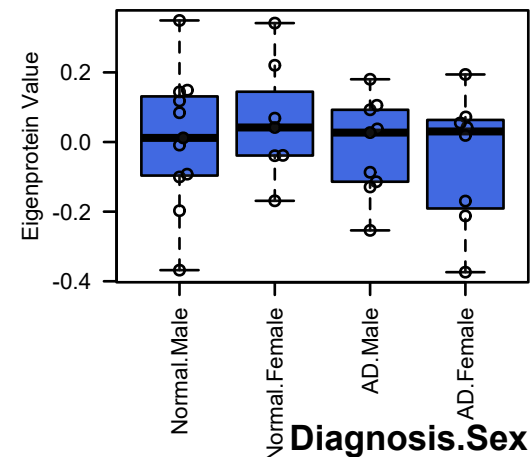

**bicor=0.23, p=0.19  
cor=0.24, p=0.16**

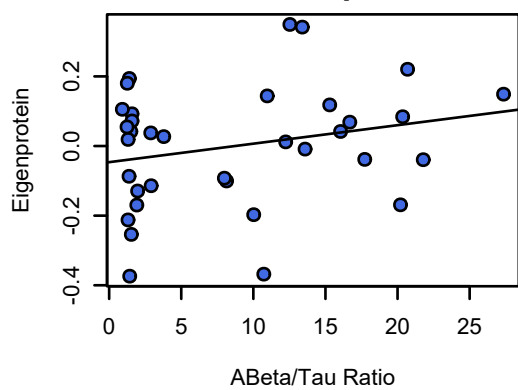

**bicor=0.084, p=0.65  
cor=0.26, p=0.16**

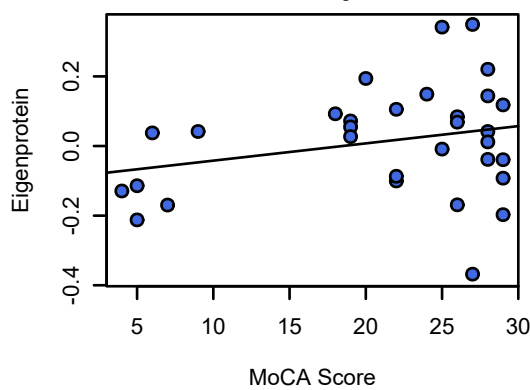

**bicor=0.14, p=0.59  
cor=0.16, p=0.53**

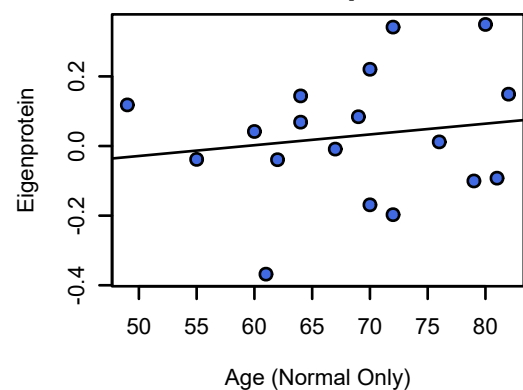

**bicor=0.14, p=0.58  
cor=0.11, p=0.67**

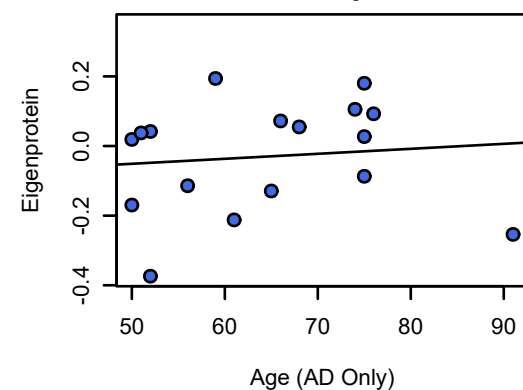

**M30 steelblue.Plasma35  
Ambiguous**

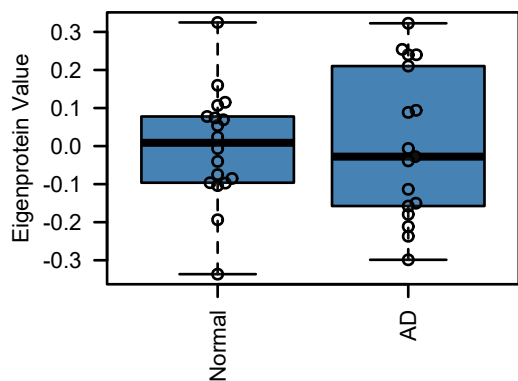

**MEsteelblue.CSF 35 Samp. (Synthetic)  
ANOVA p: 0.61**

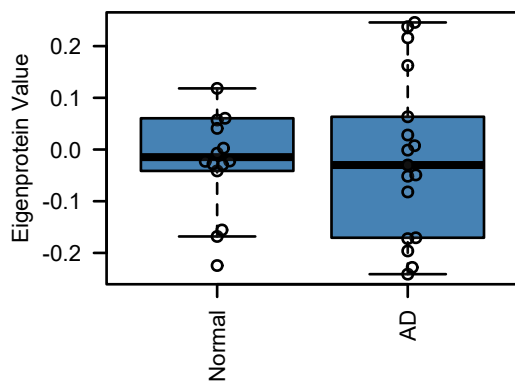

**MEsteelblue.CSF (Synthetic)  
ANOVA p: 0.06**

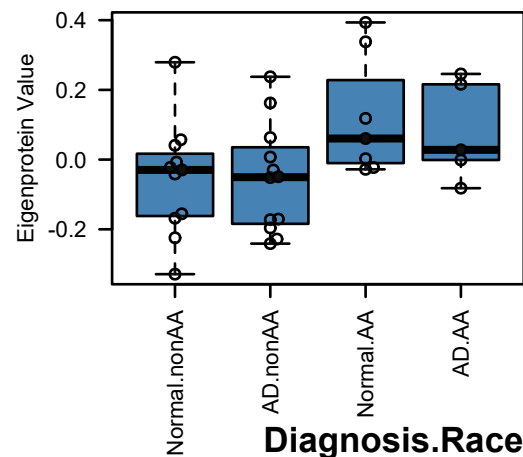

**MEsteelblue.CSF (Synthetic)  
ANOVA p: 0.17**

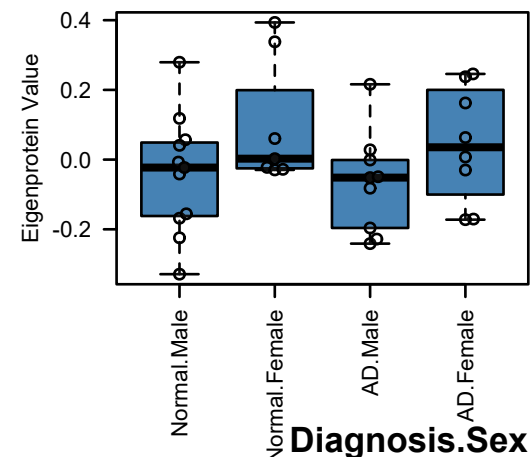

**bicor=0.27, p=0.12  
cor=0.28, p=0.1**

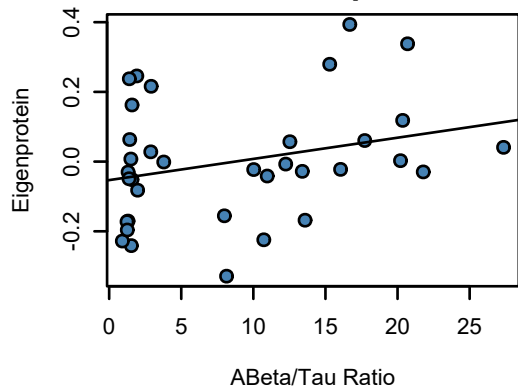

**bicor=0.0048, p=0.98  
cor=-0.0065, p=0.97**

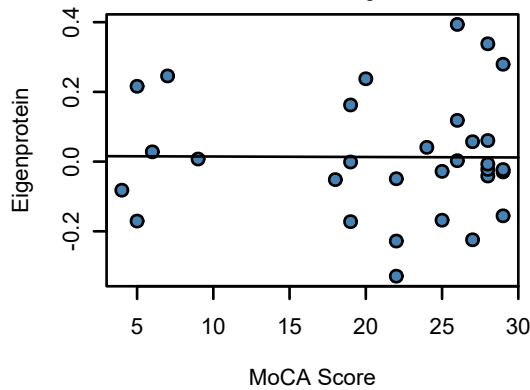

**bicor=-0.28, p=0.26  
cor=-0.32, p=0.2**

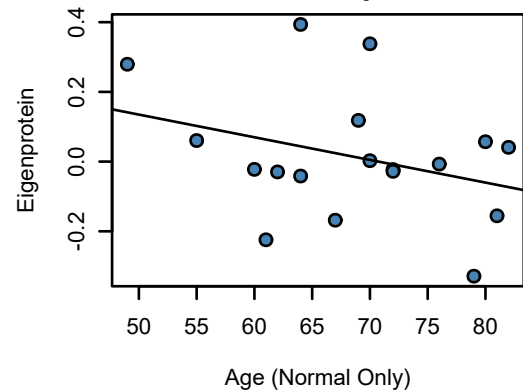

**bicor=-0.62, p=0.0073  
cor=-0.62, p=0.0079**

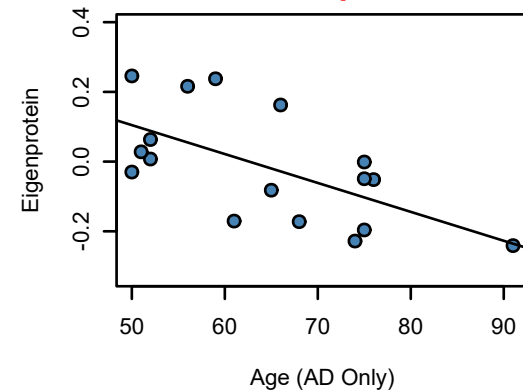

**Data Subset:**

**Plasma 32 of 35 modules as template**

# M16 lightcyan: Complement/Protein Activation Cascade

slopeDiff(AD-CT): 0.272

Normal:

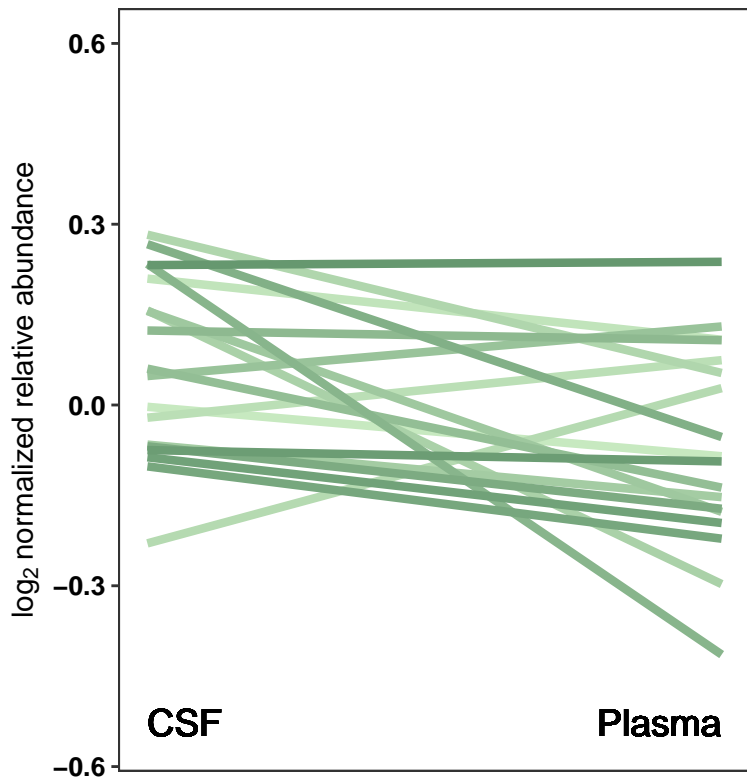

AD:

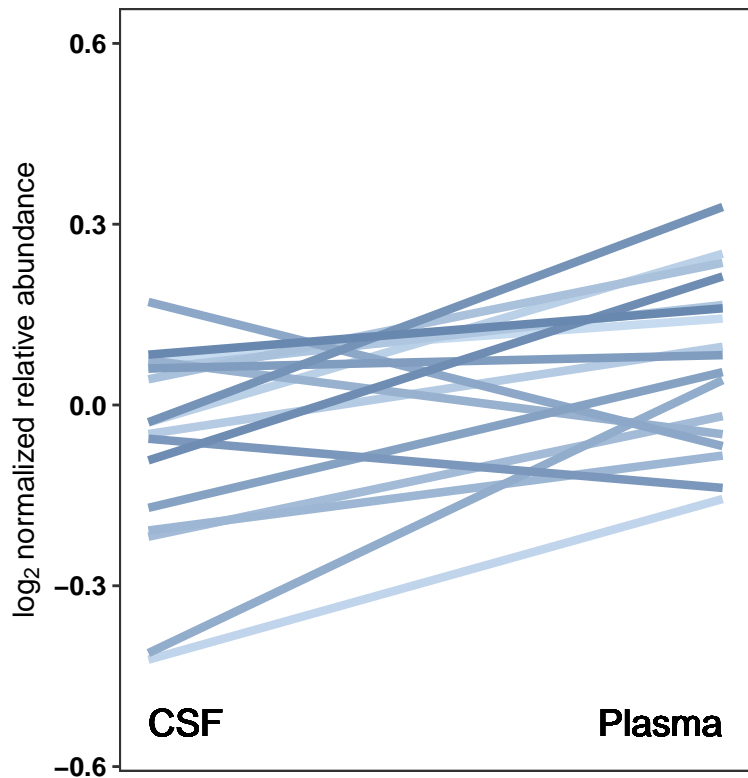

# M8 pink: Protein Activation Cascade

slopeDiff(AD-CT): 0.25

Normal:

AD:

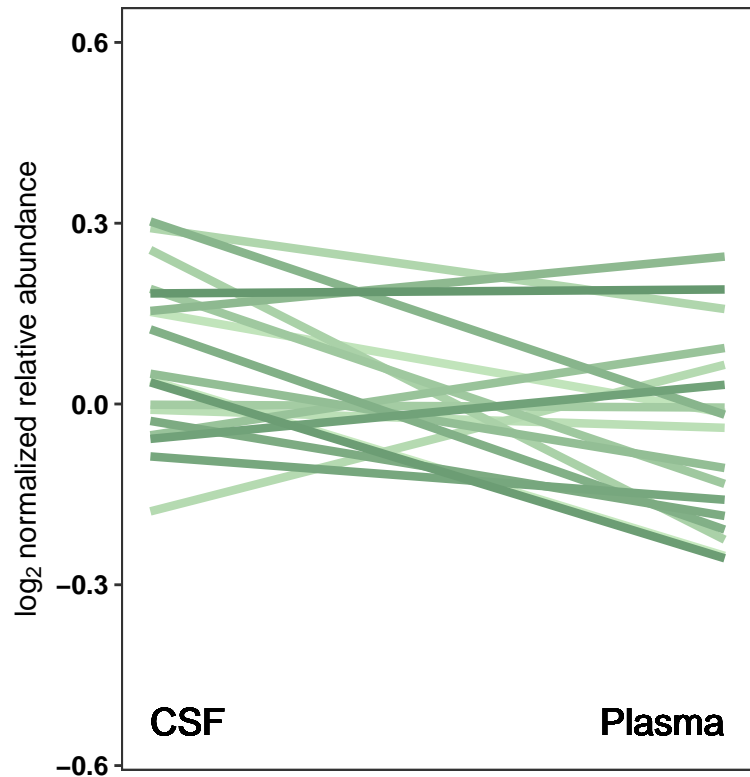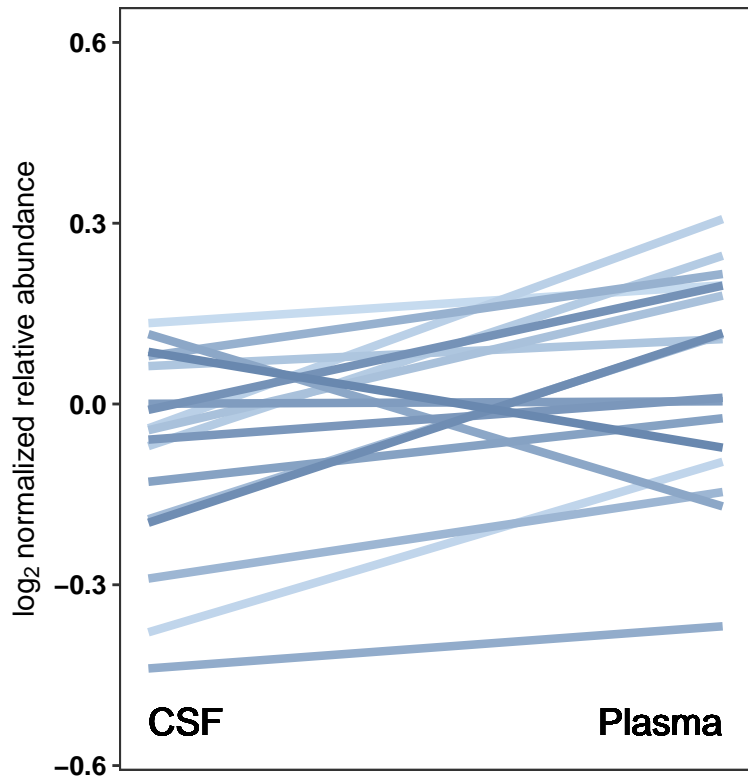

# M27 white: Collagen/ECM

slopeDiff(AD-CT): 0.24

Normal:

AD:

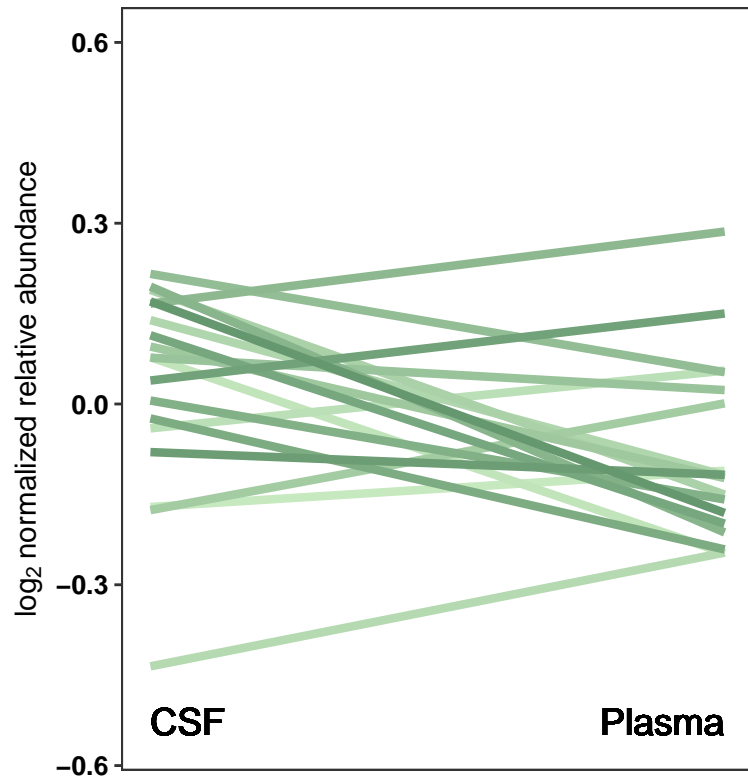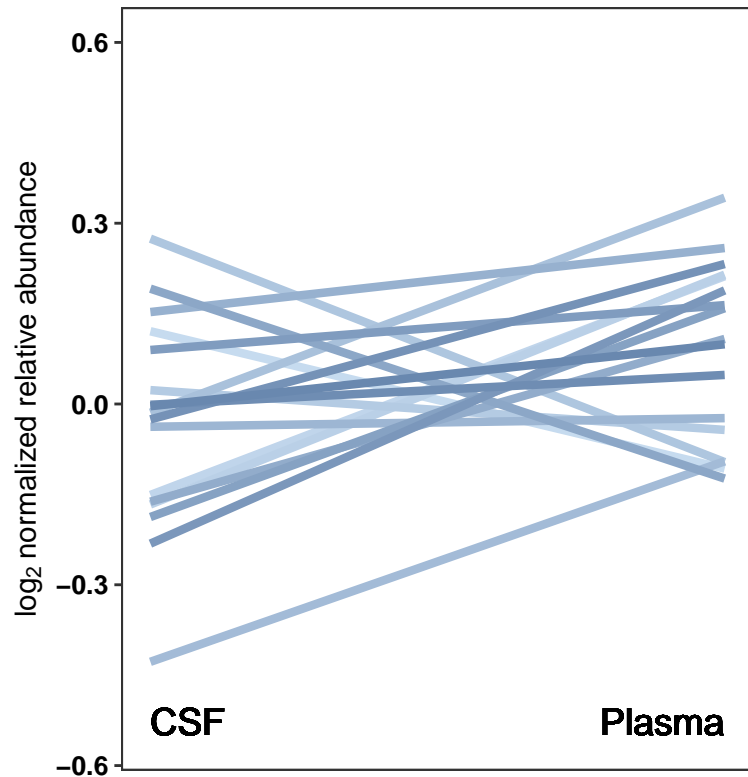

# M22 darkgreen: Protein Activation Cascade/Proteolysis

slopeDiff(AD-CT): 0.235

Normal:

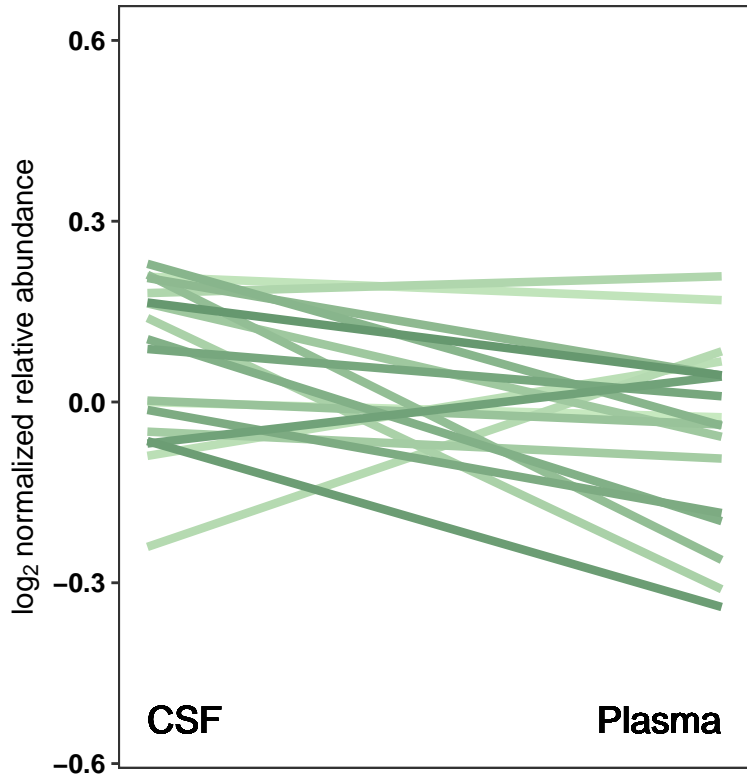

AD:

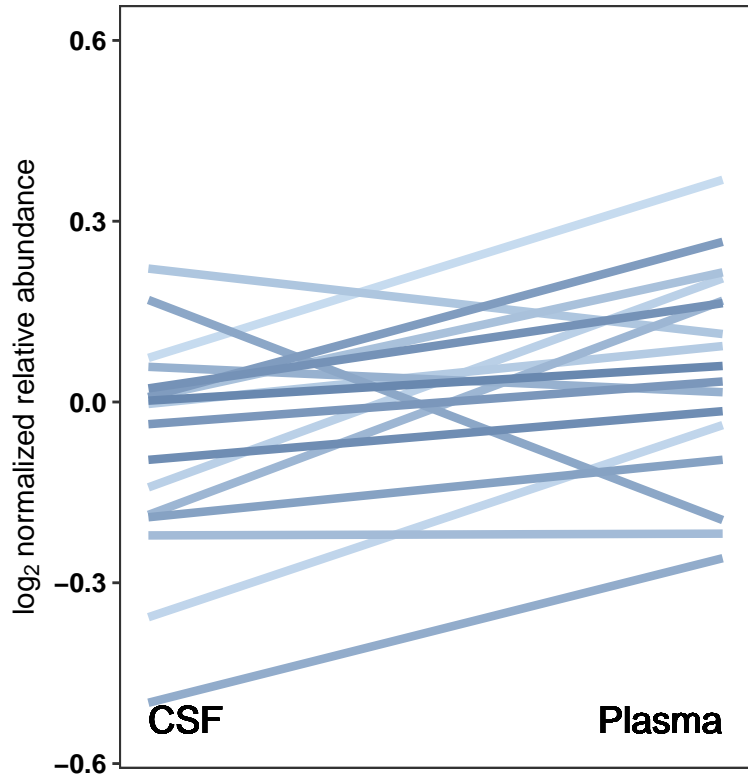



# M24 darkgrey: Endocytosis

slopeDiff(AD-CT): 0.229

Normal:

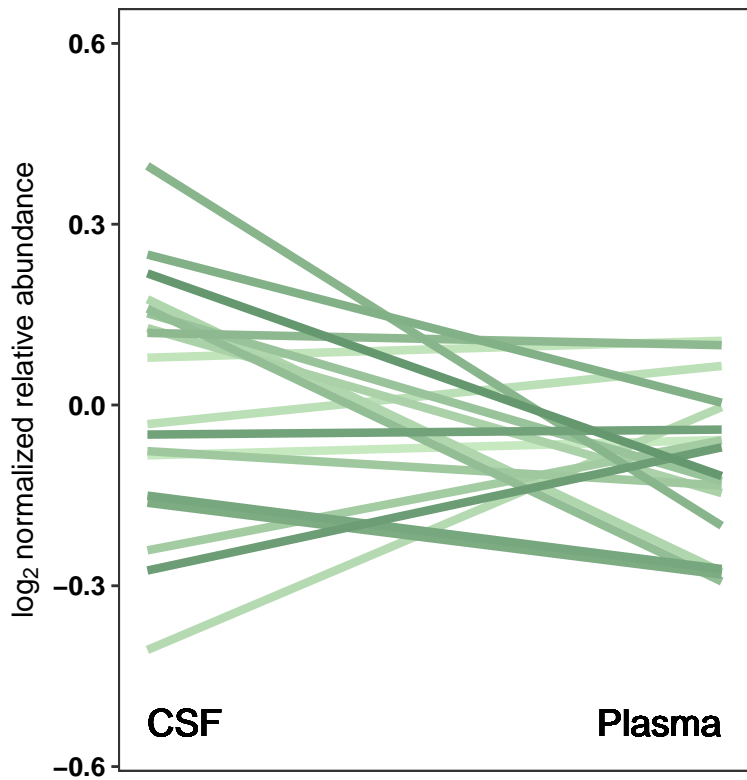

AD:

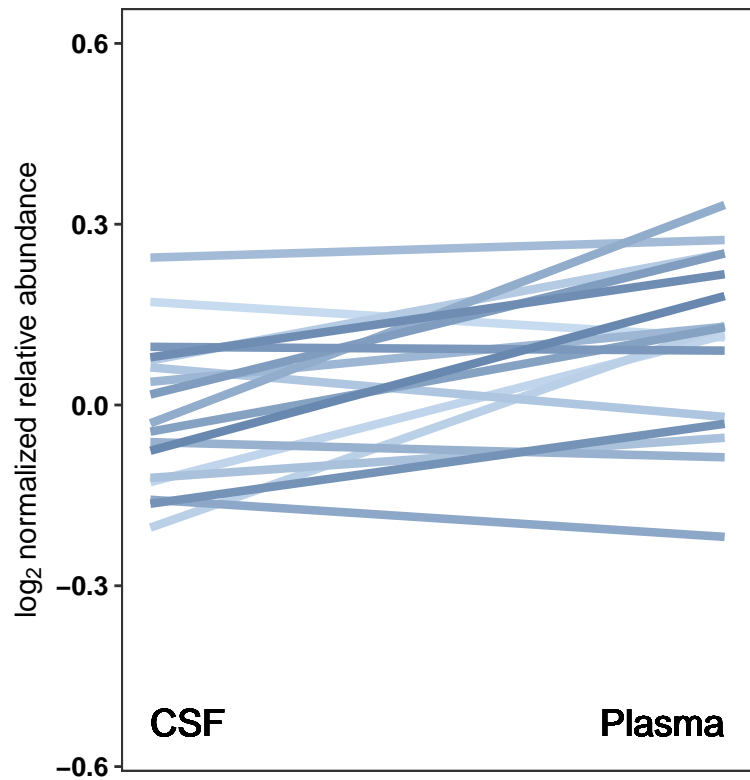

# M35 sienna3: Ambiguous

slopeDiff(AD-CT): 0.218

Normal:

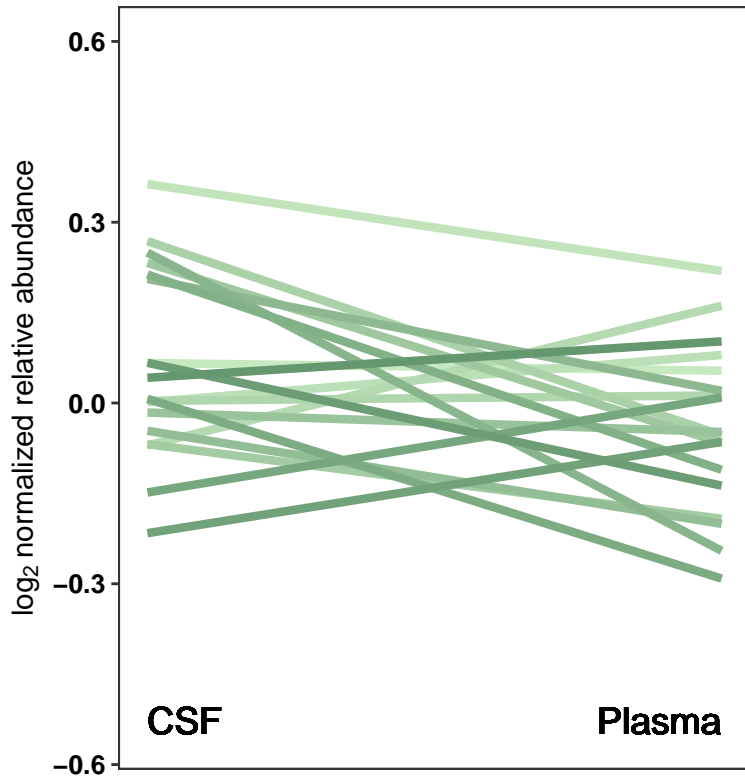

AD:

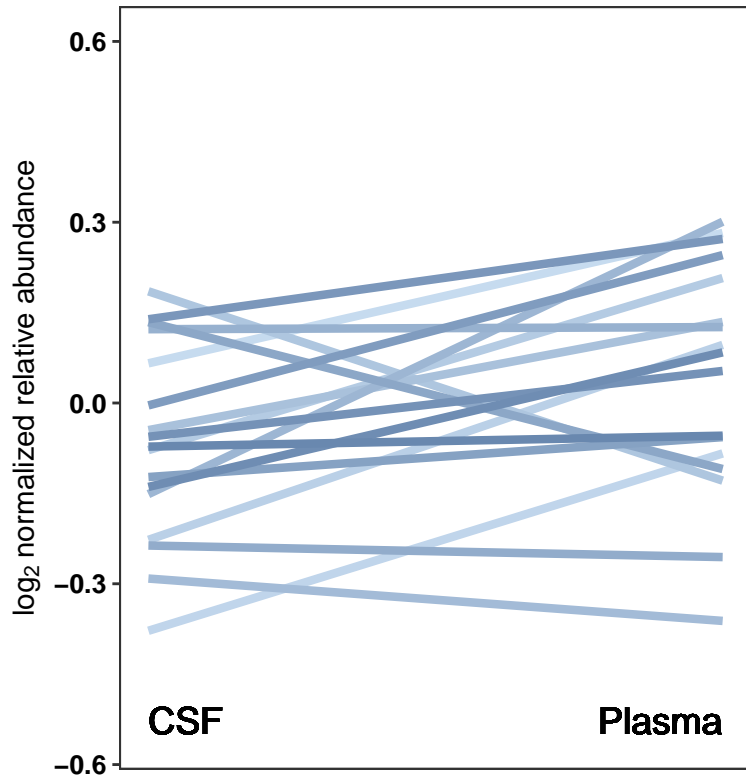

# M29 saddlebrown: IGF-Growth/GAG Binding

slopeDiff(AD-CT): 0.207

Normal:

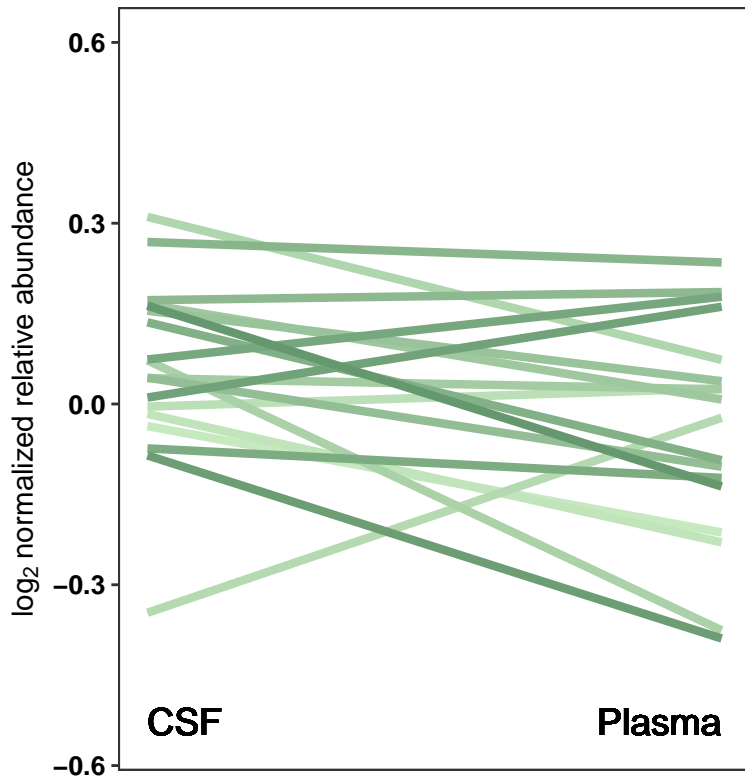

AD:

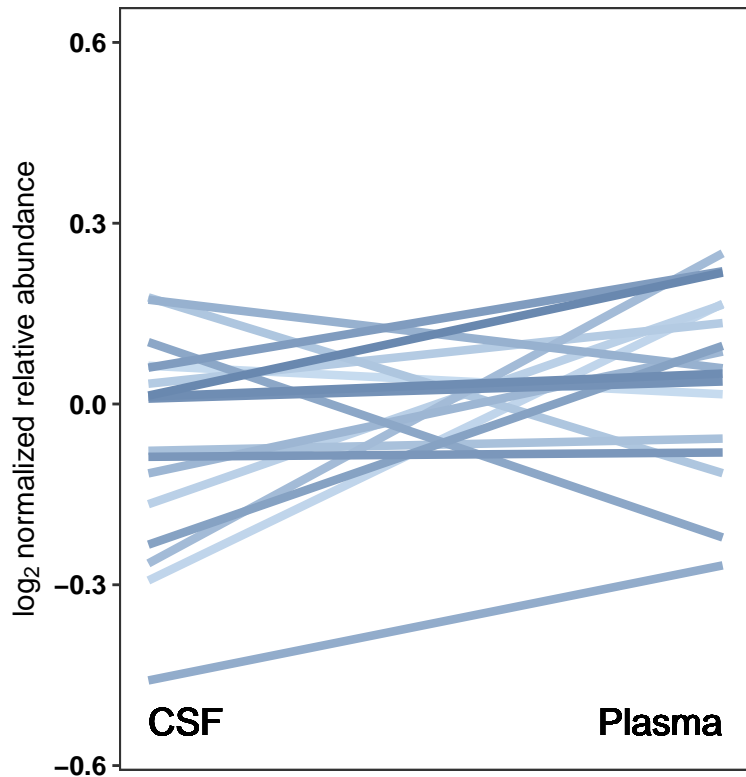

# M10 purple: Ambiguous

slopeDiff(AD-CT): 0.204

Normal:

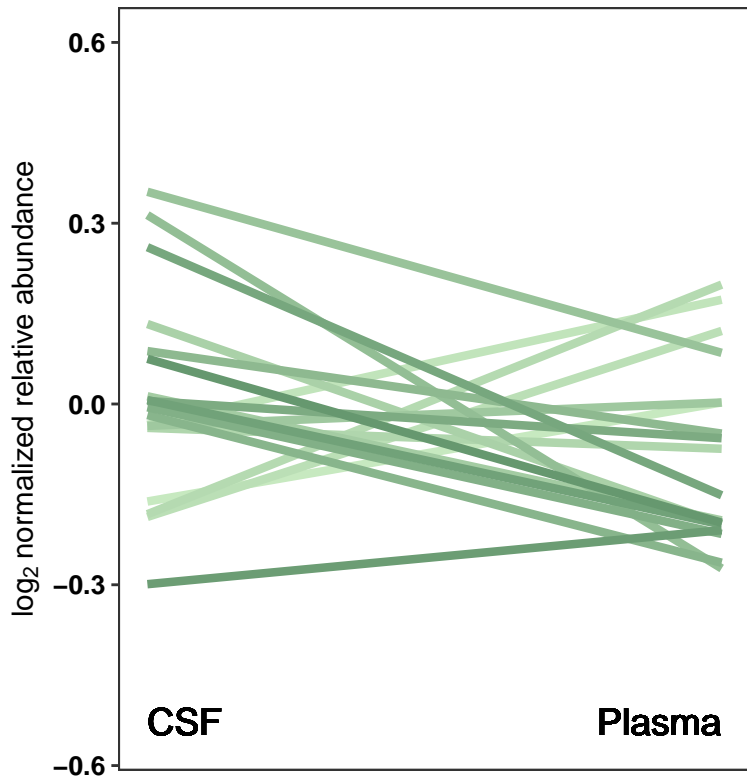

AD:

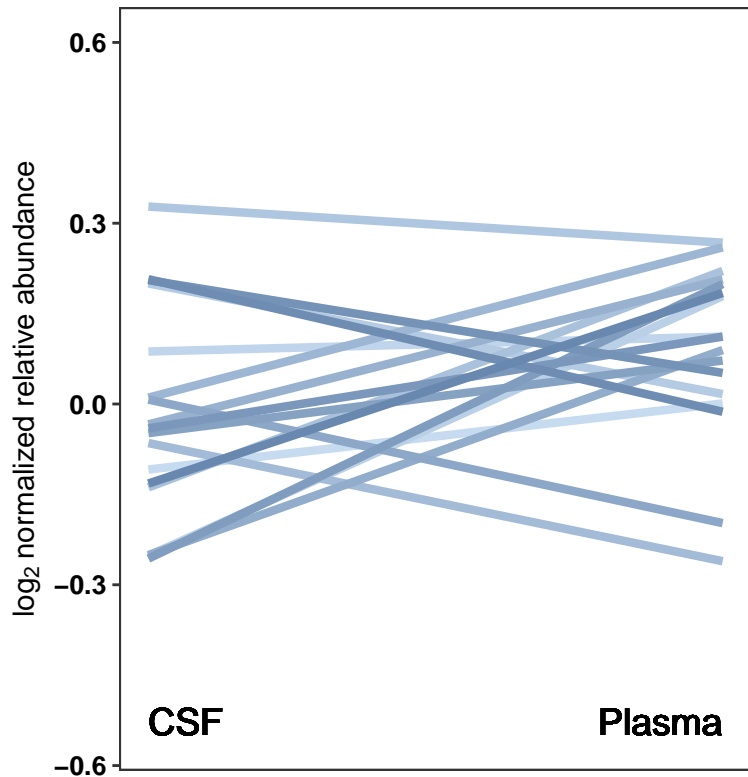

# M1 turquoise: Cellular Metabolism/Intracellular Transport

slopeDiff(AD-CT): -0.185

Normal:

AD:

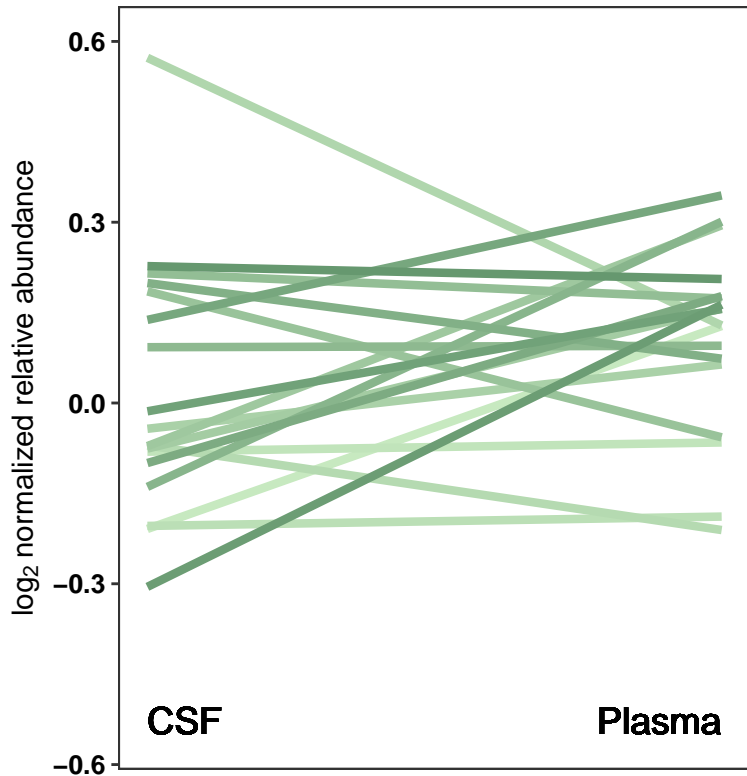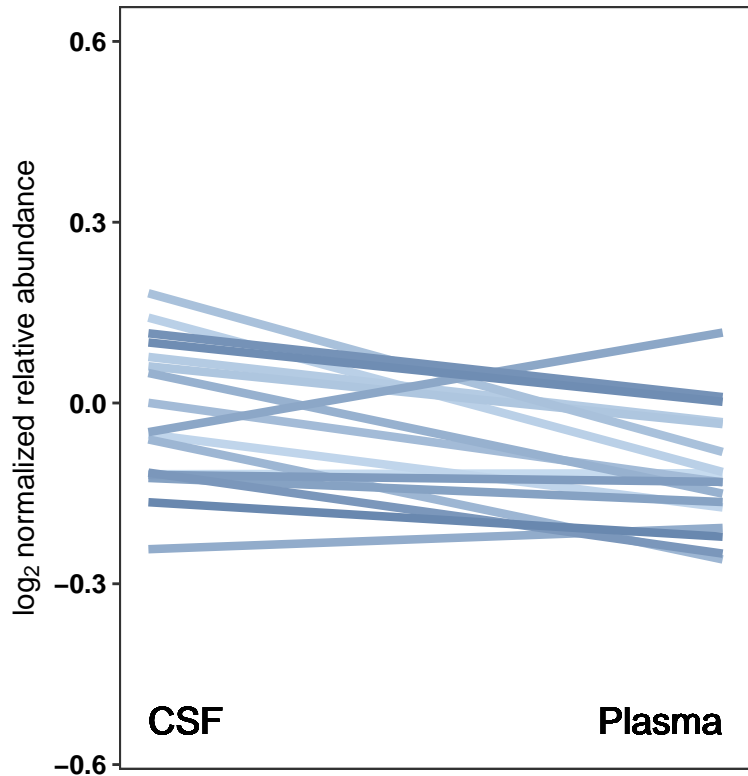

# M34 darkmagenta: Carbohydrate Binding

slopeDiff(AD-CT): 0.18

Normal:

AD:

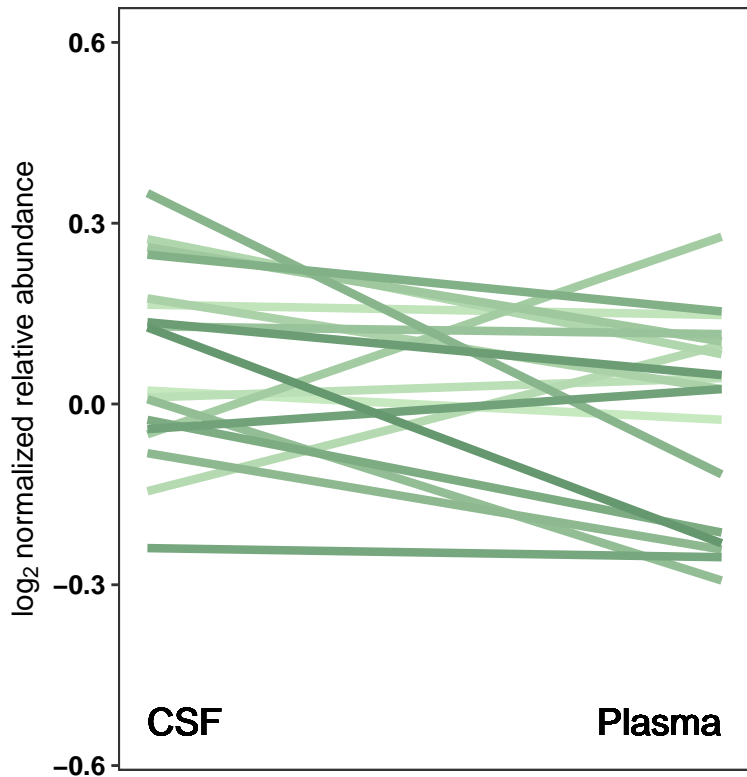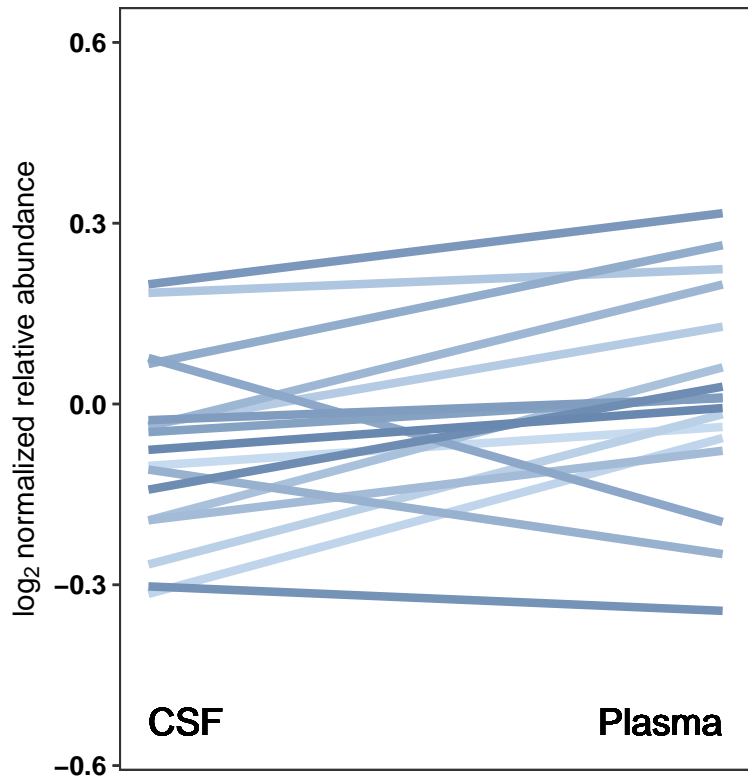

# M6 red: Axon Guidance/Nervous System Dev

slopeDiff(AD-CT): 0.171

Normal:

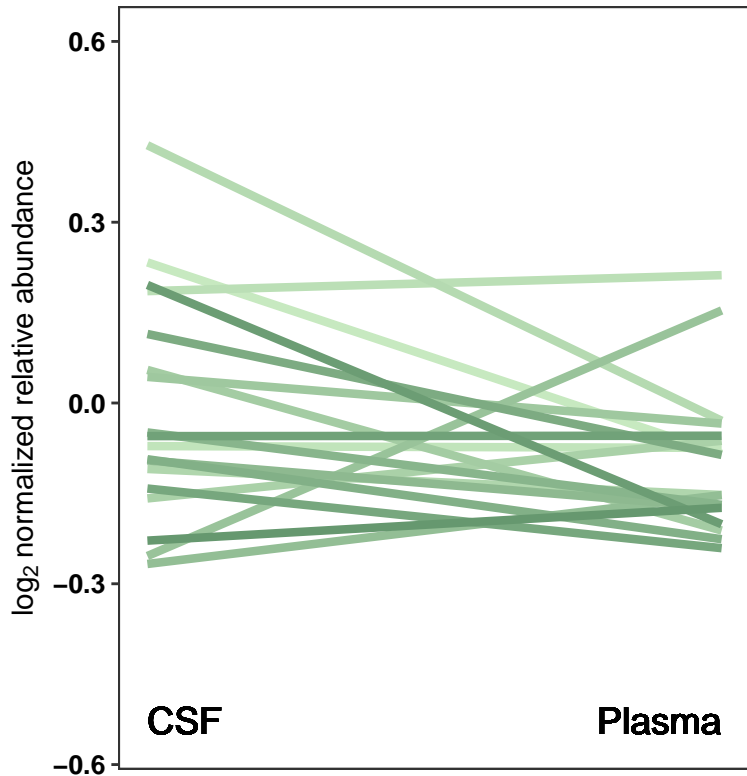

AD:

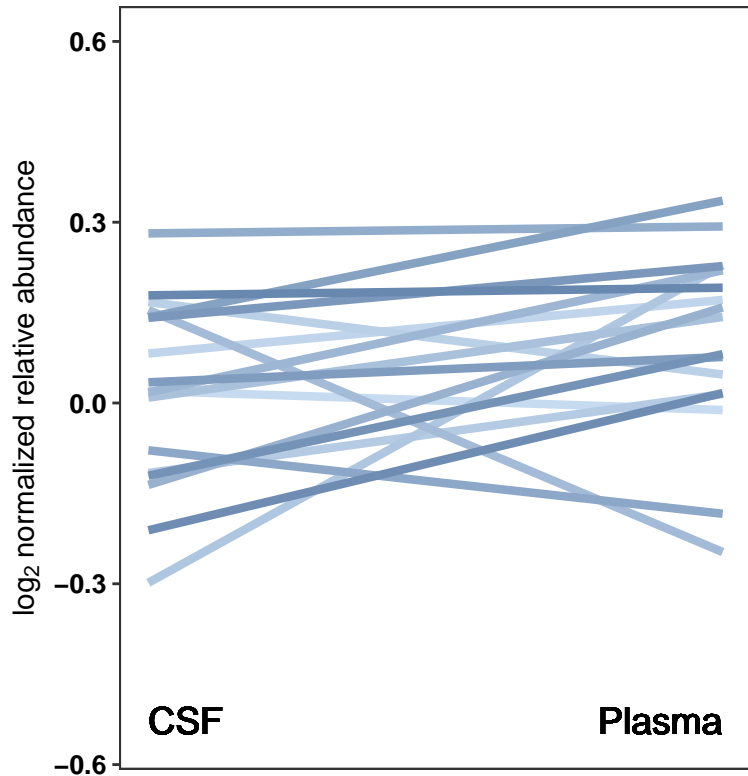

# M28 skyblue: Complement/Humoral Immune Response

slopeDiff(AD-CT): 0.169

Normal:

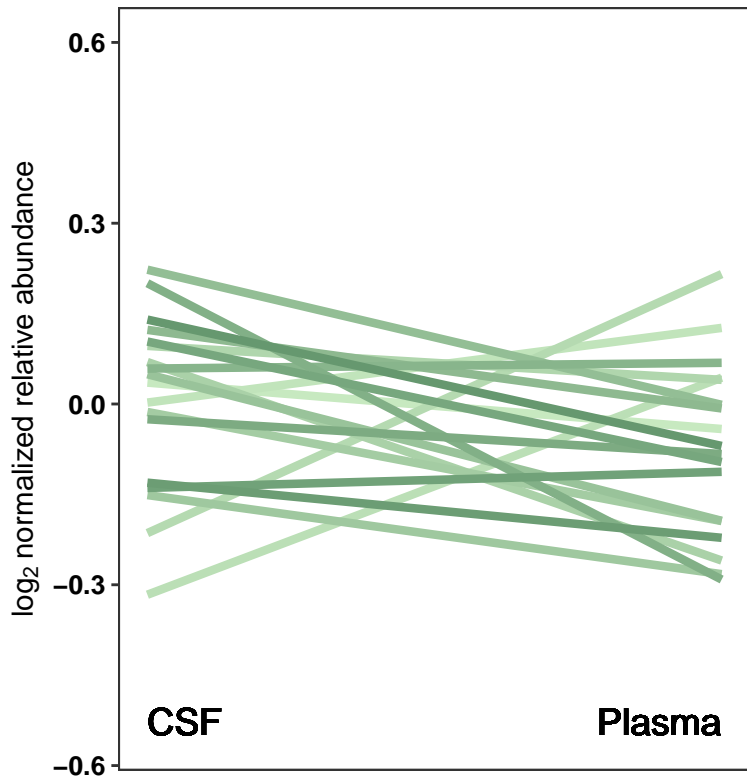

AD:

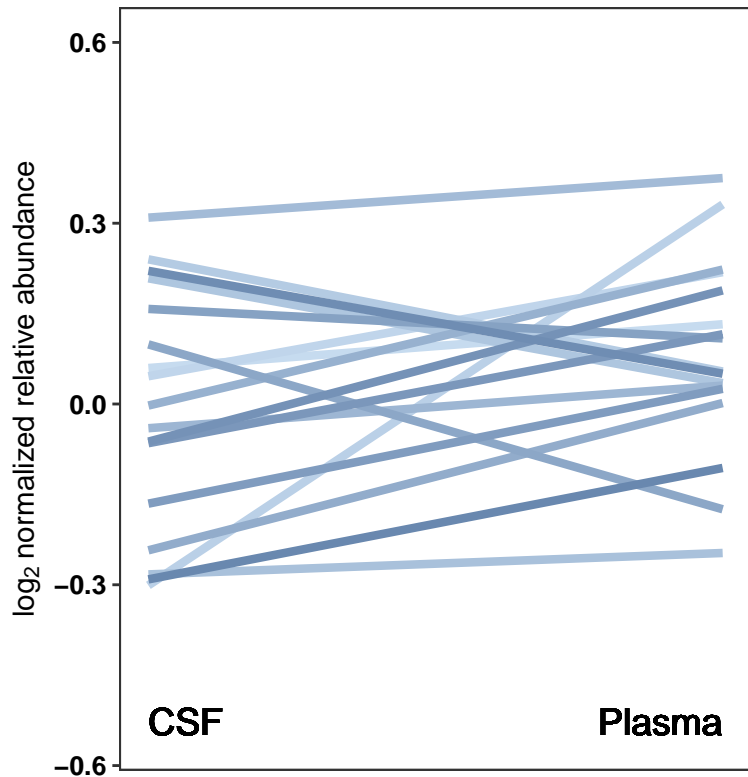



# M2 blue: Ambiguous

slopeDiff(AD-CT): -0.167

Normal:

AD:

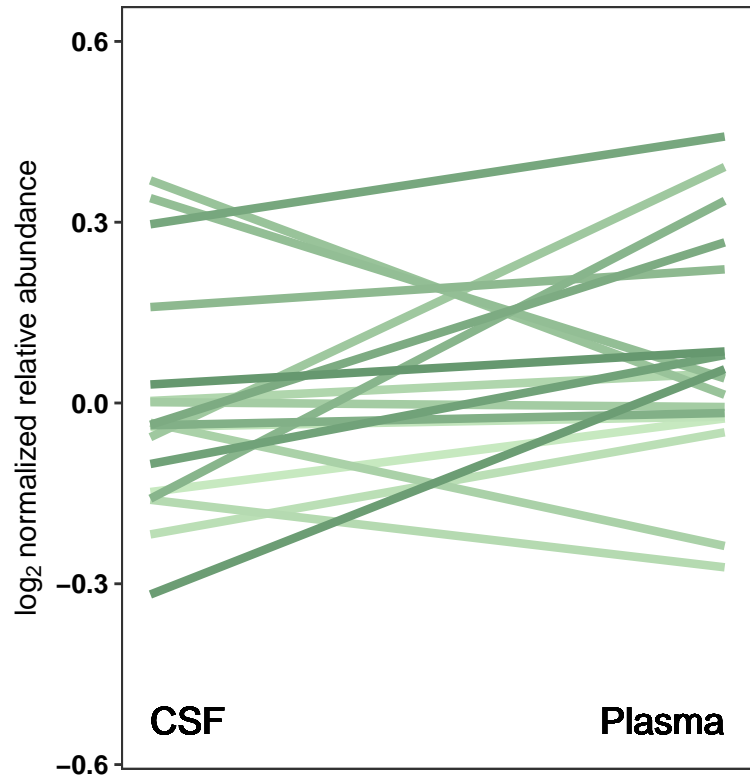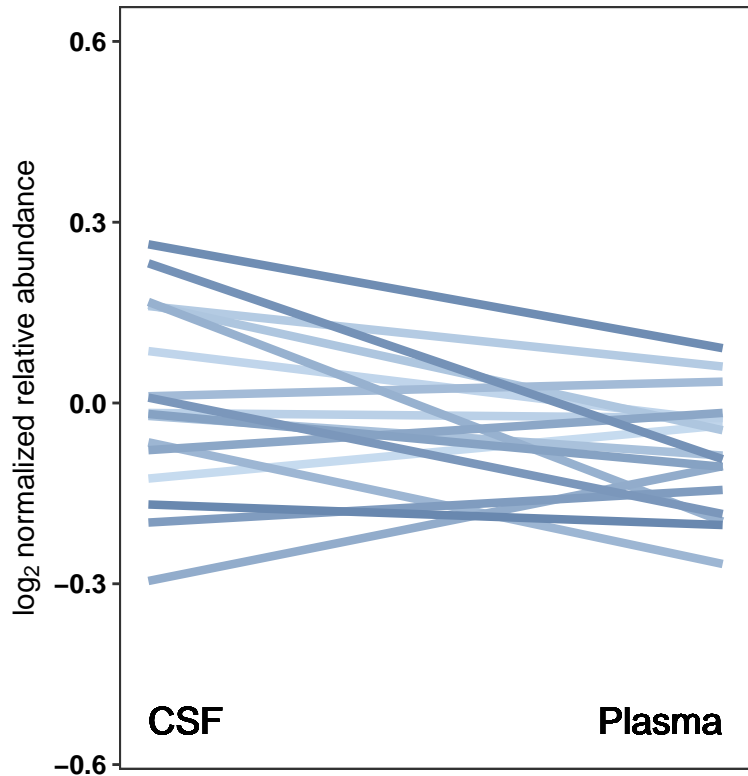

# M32 violet: Lipoprotein Metabolism

slopeDiff(AD-CT): 0.166

Normal:

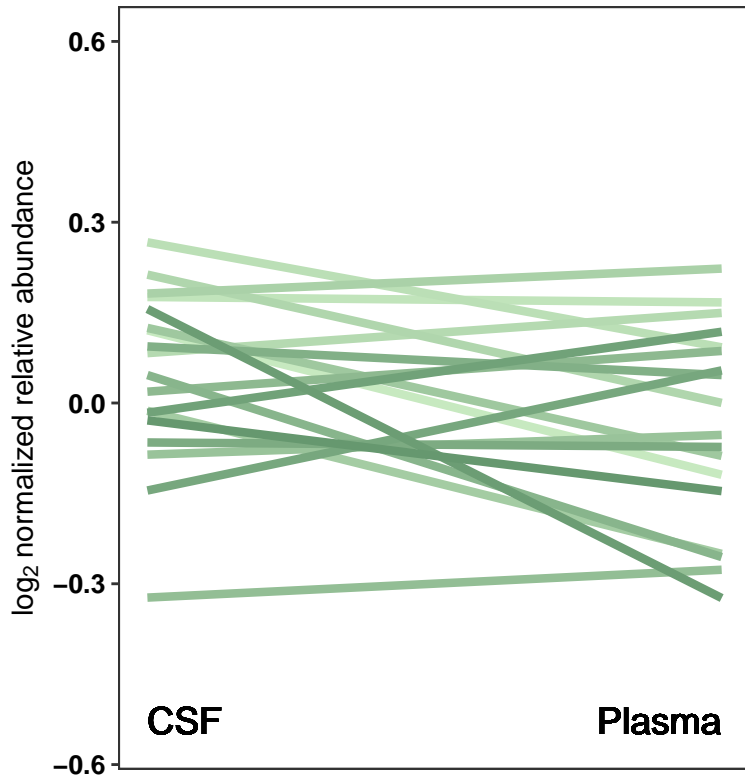

AD:

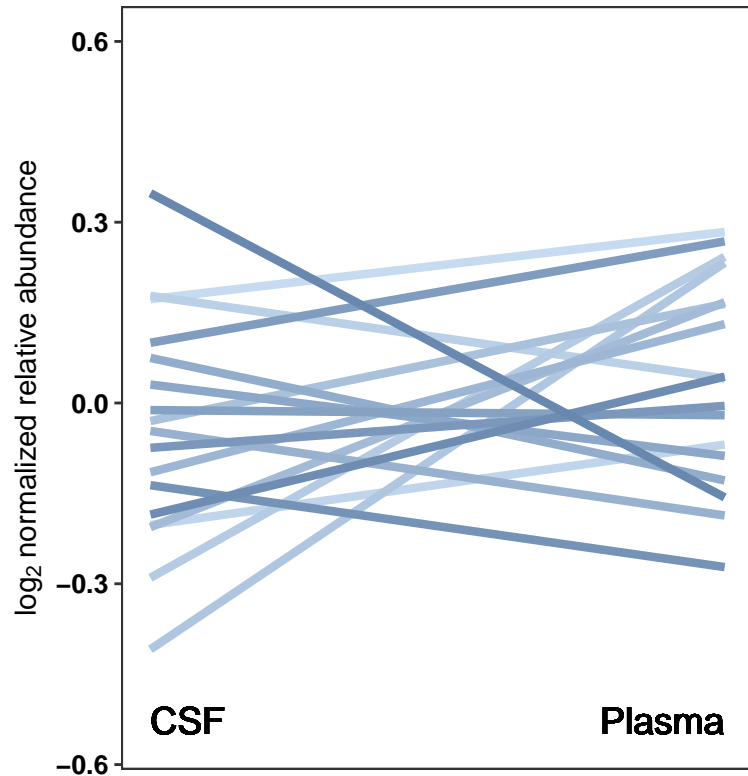

# M33 darkolivegreen: Adhesion/ECM/Wound Response

slopeDiff(AD-CT): 0.166

Normal:

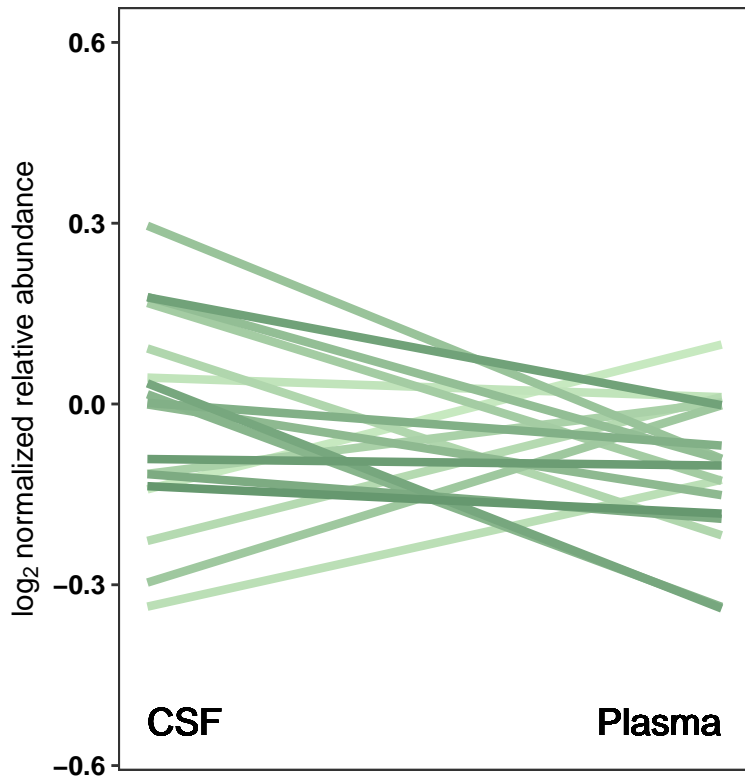

AD:

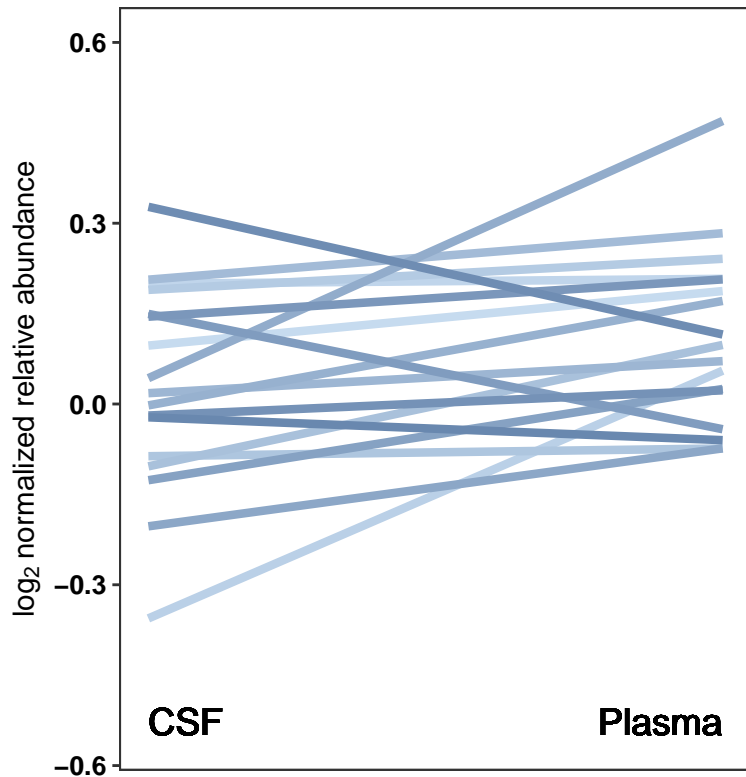

# M18 lightgreen: Cellular Adhesion/ECM Organization

slopeDiff(AD-CT): 0.147

Normal:

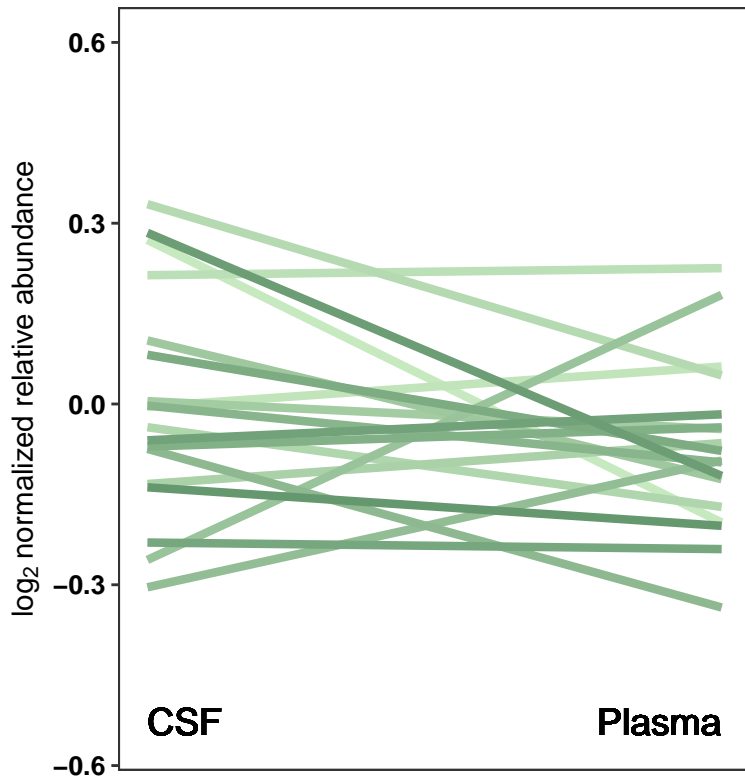

AD:

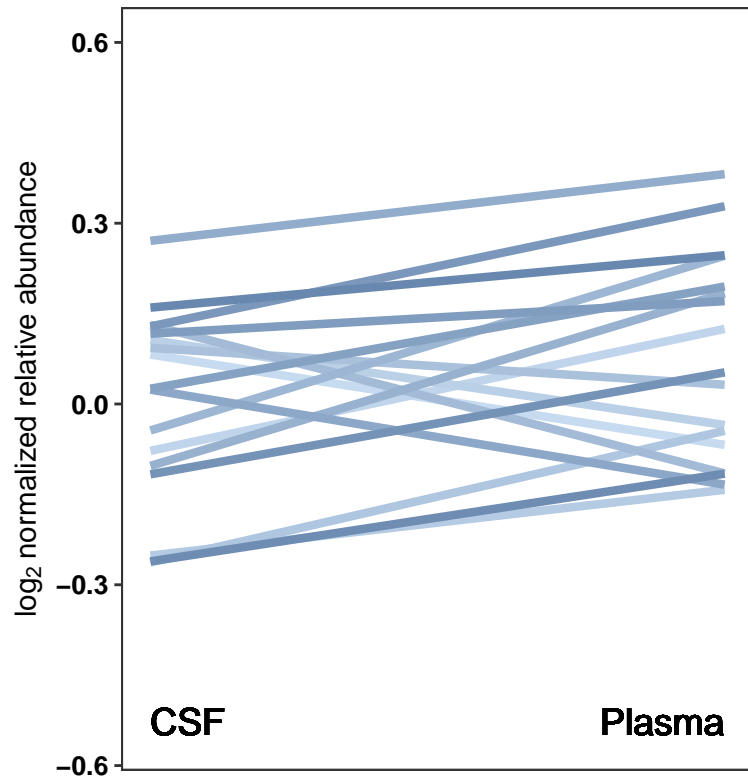

# M14 cyan: Innate Immune Response

slopeDiff(AD-CT): 0.144

Normal:

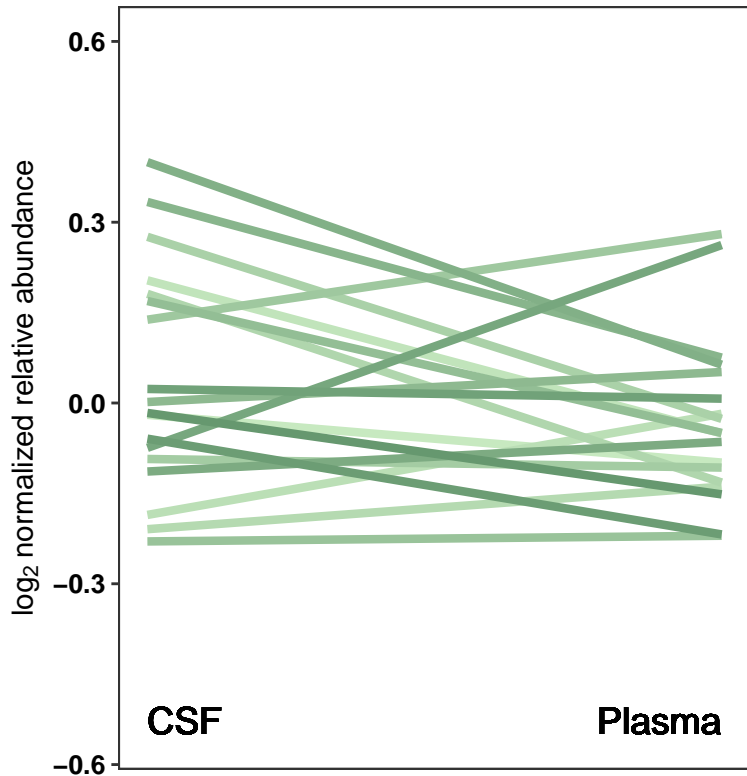

AD:

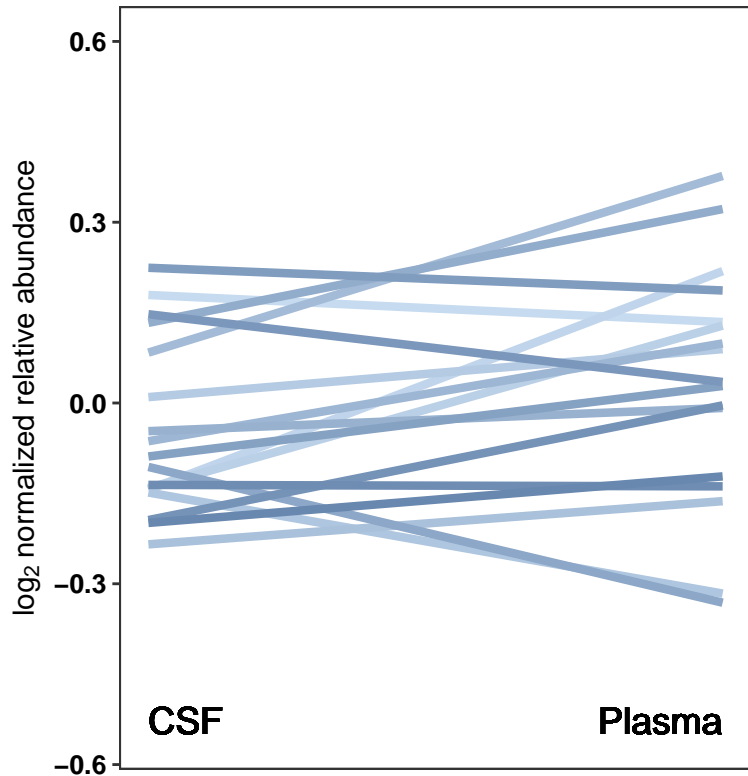

# M25 orange: Lysosome

slopeDiff(AD-CT): 0.143

Normal:

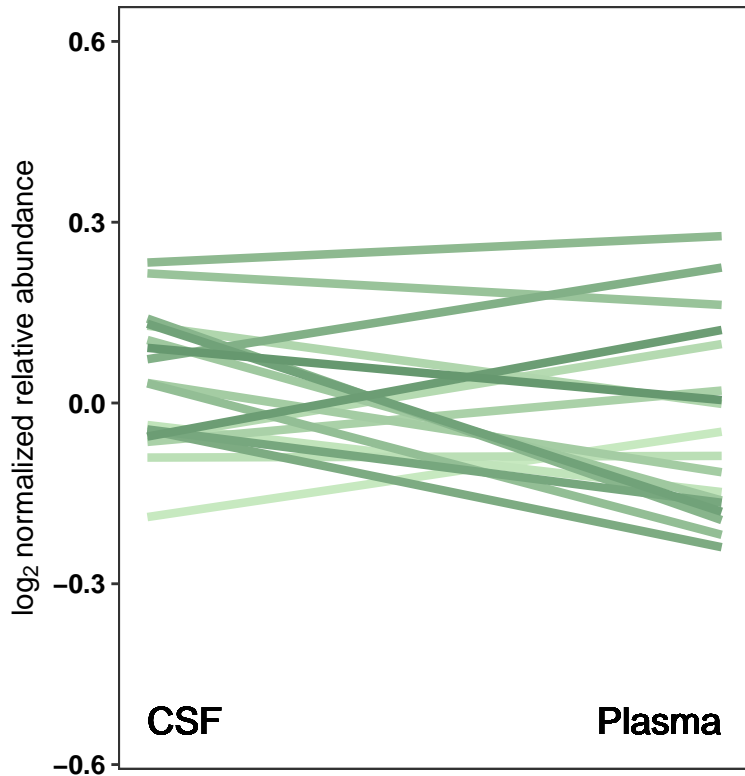

AD:

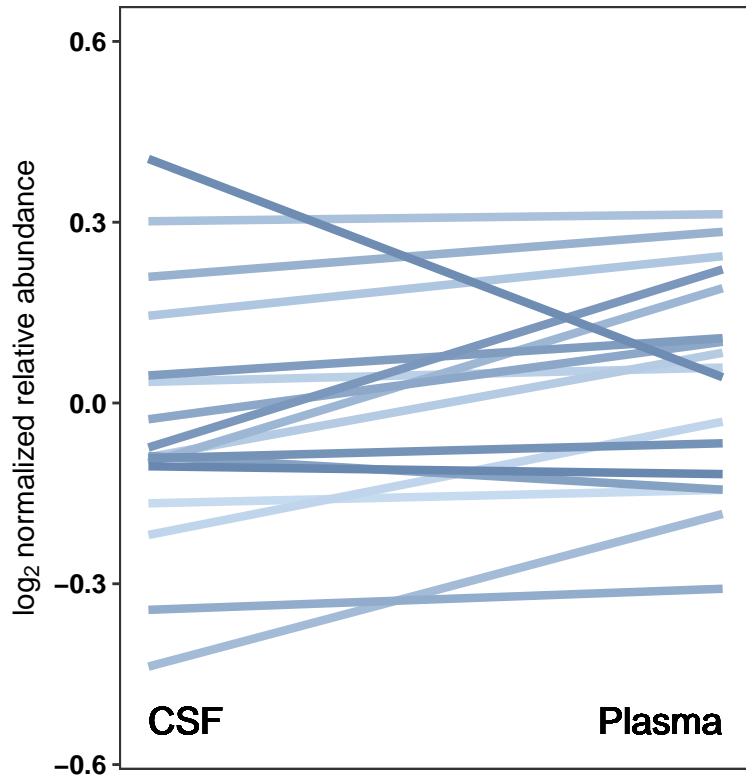

# M12 tan: Matrisome

slopeDiff(AD-CT): 0.132

Normal:

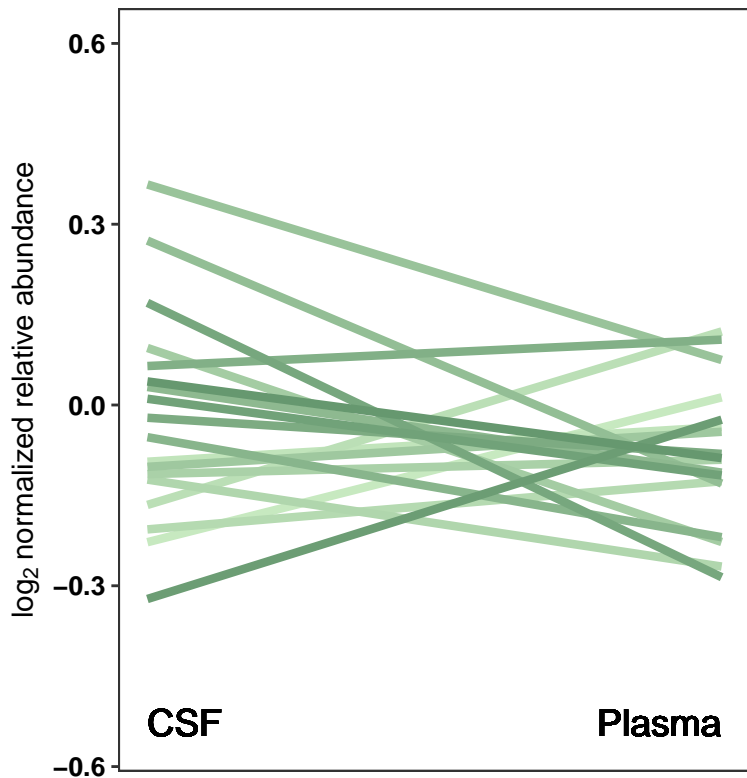

AD:

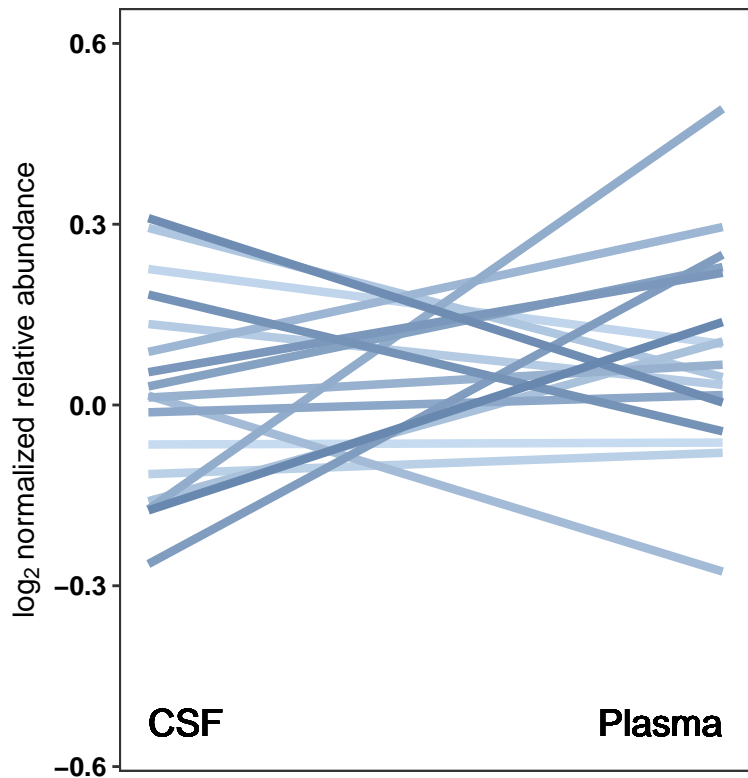

# M20 royalblue: Digestion

slopeDiff(AD-CT): 0.113

Normal:

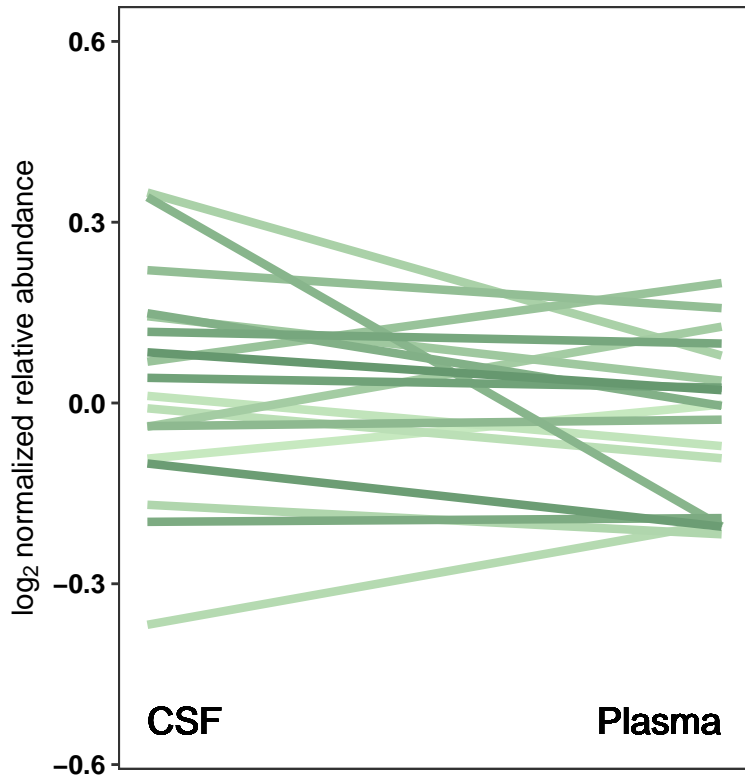

AD:

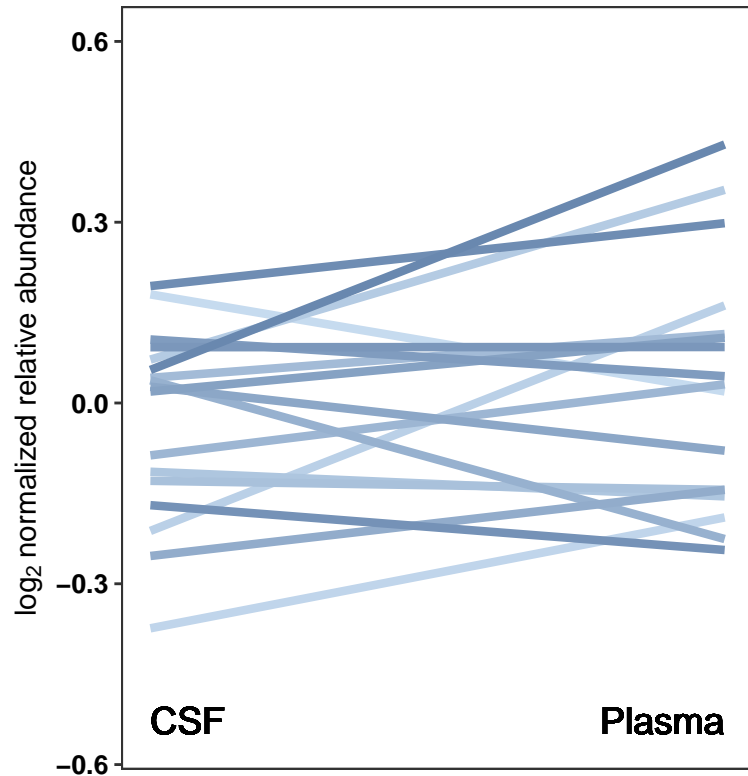



# M19 lightyellow: Leukocyte Activation

slopeDiff(AD-CT): 0.109

Normal:

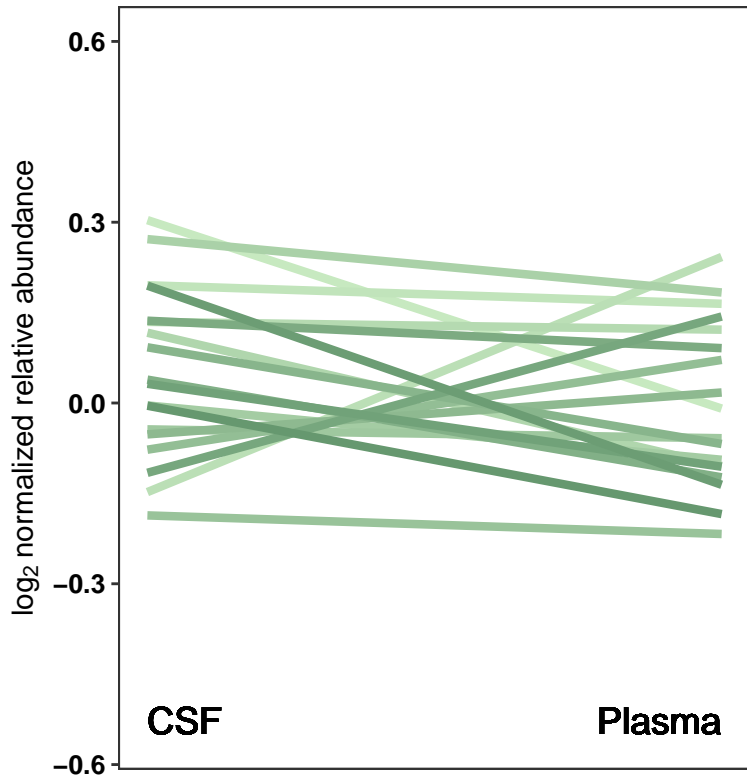

AD:

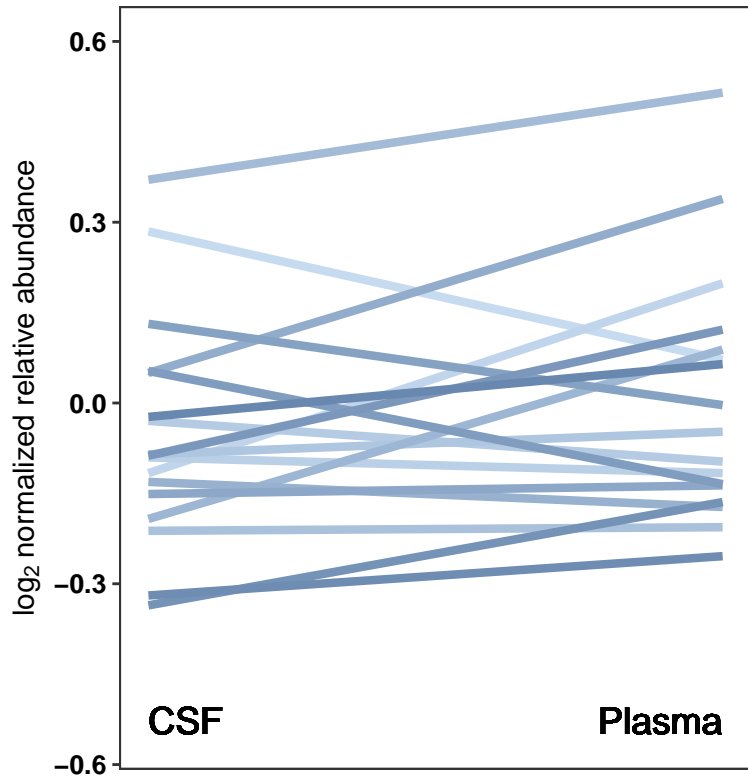

# M5 green: ECM/IGF-PDGF Binding

slopeDiff(AD-CT): 0.107

Normal:

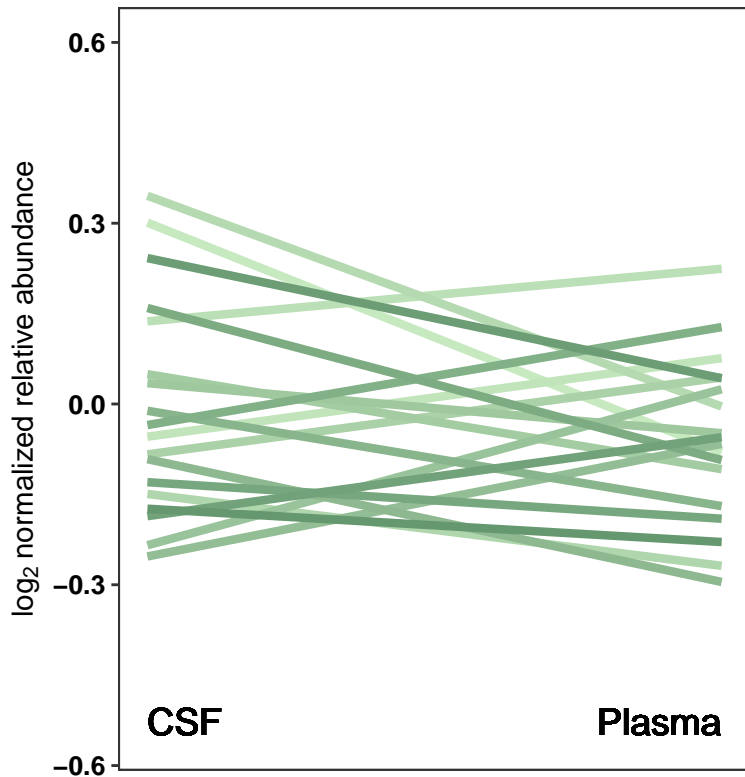

AD:

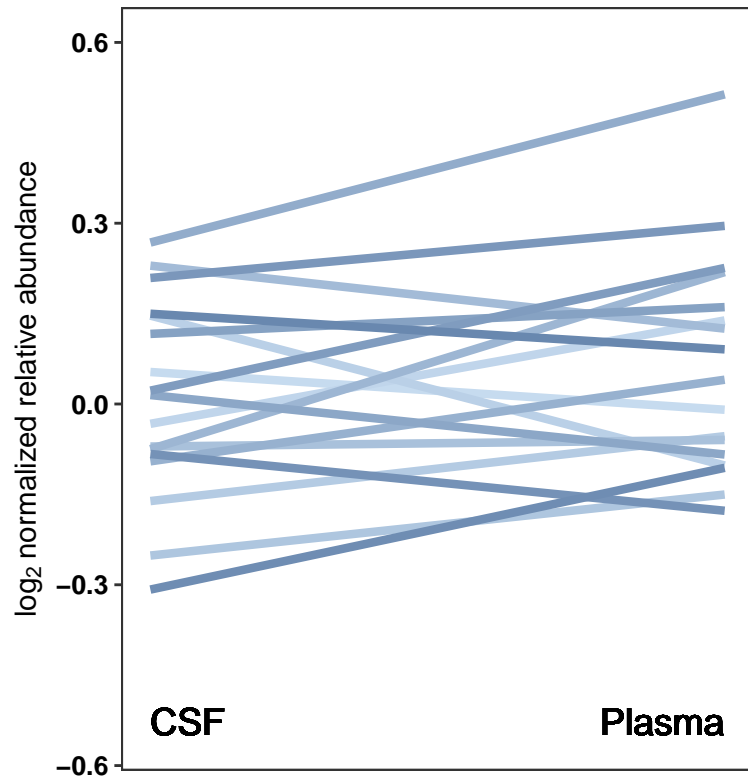

# M11 greenyellow: Immunoglobulins/Coagulation Cascade

slopeDiff(AD-CT): 0.0952

Normal:

AD:

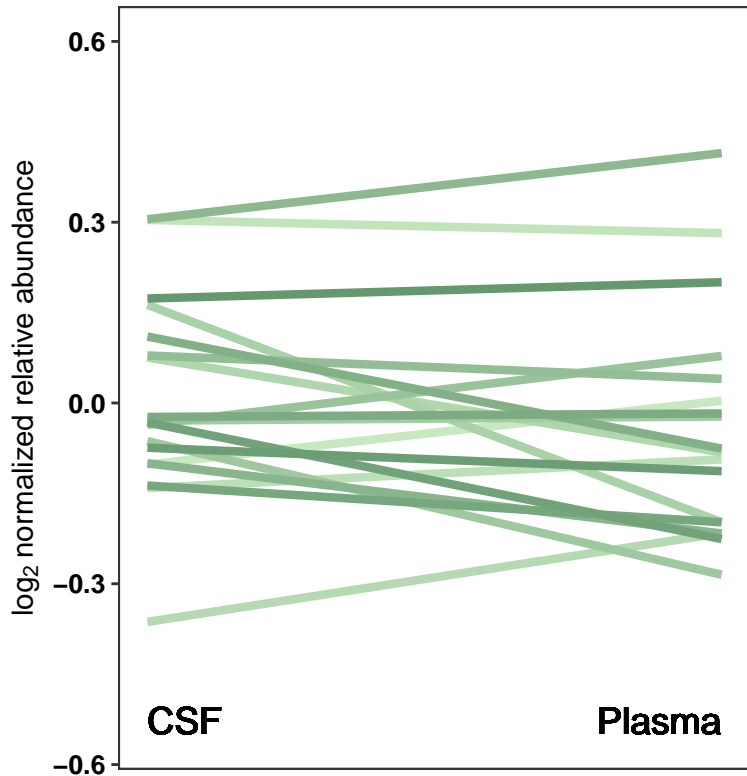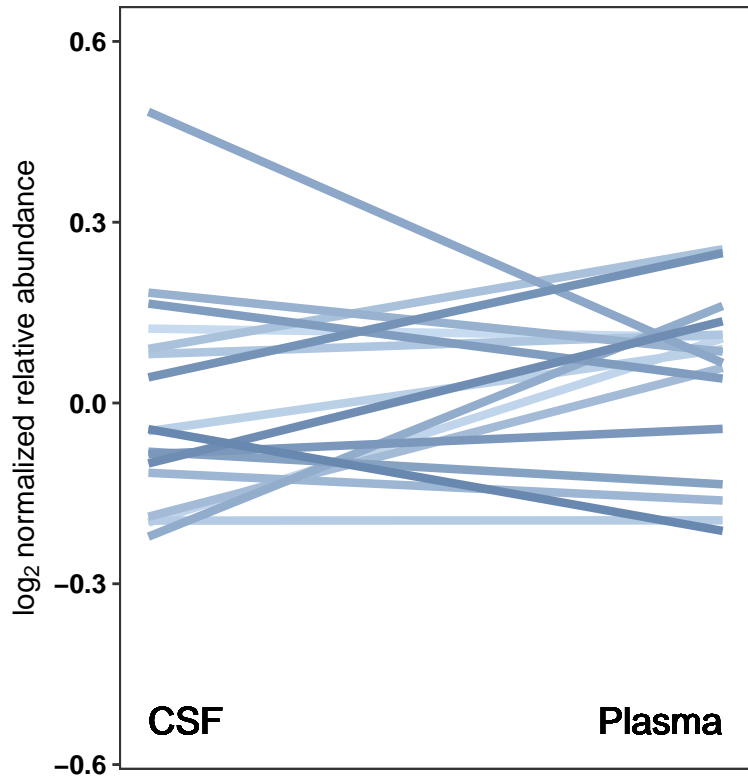

# M9 magenta: Leukocyte Chemotaxis

slopeDiff(AD-CT): -0.0861

Normal:

AD:

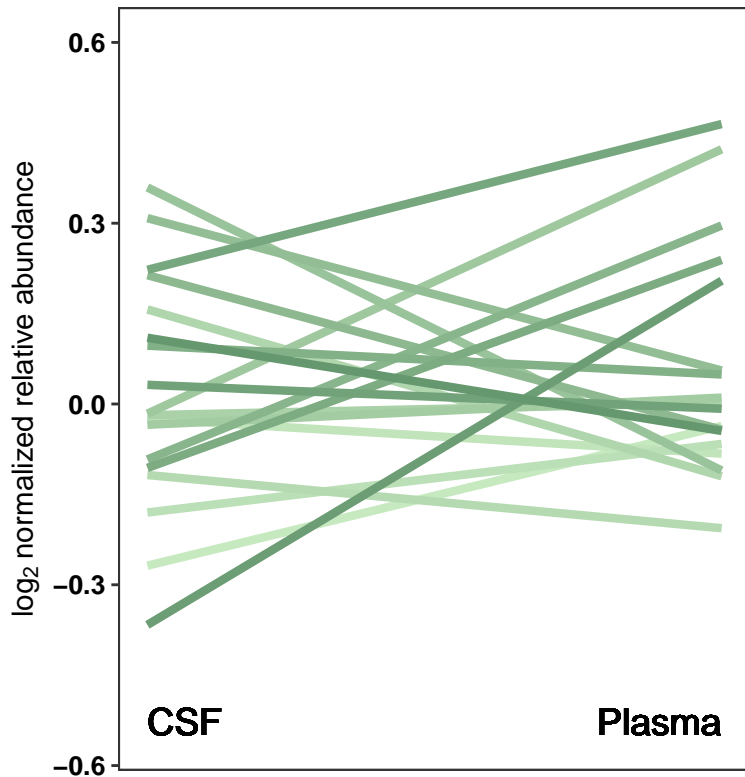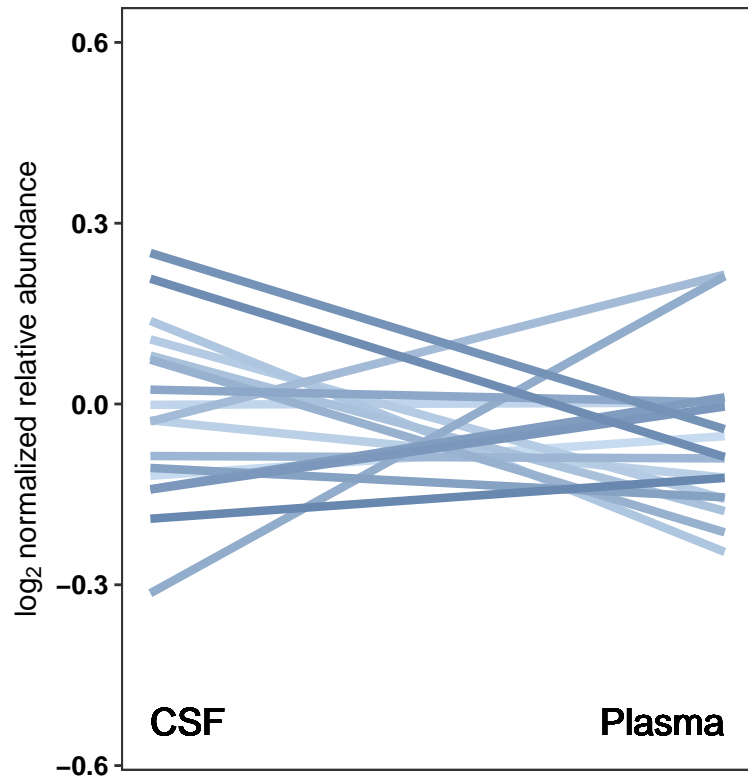

# M15 midnightblue: Lipid Biosynthesis/Immune Response

slopeDiff(AD-CT): 0.0808

Normal:

AD:

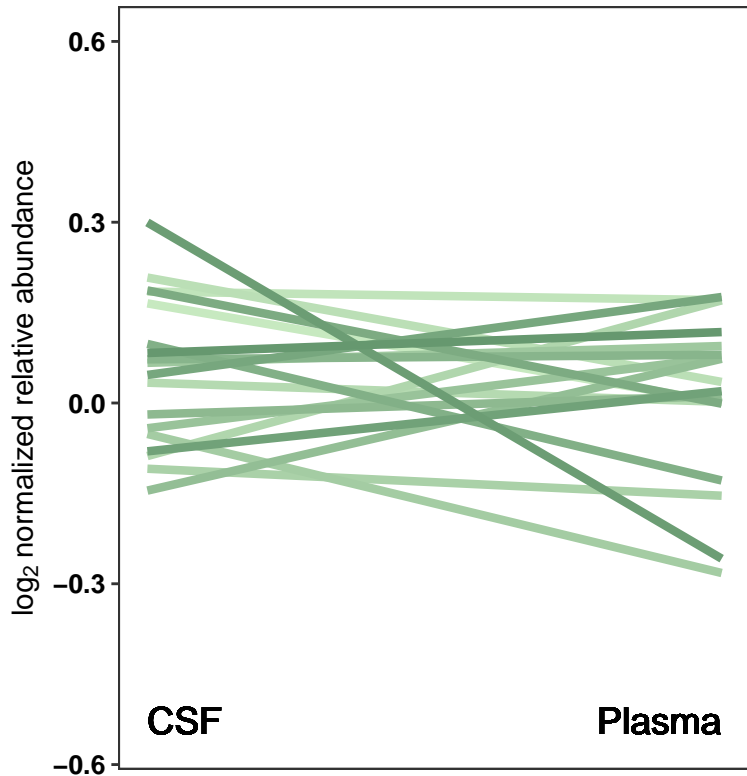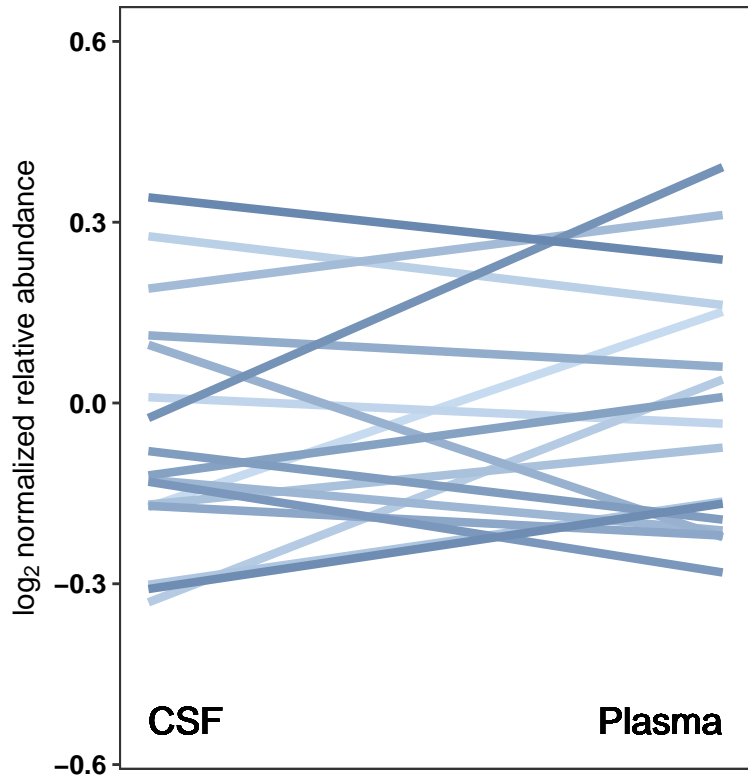

# M17 grey60: Glycosylation

slopeDiff(AD-CT): -0.0706

Normal:

AD:

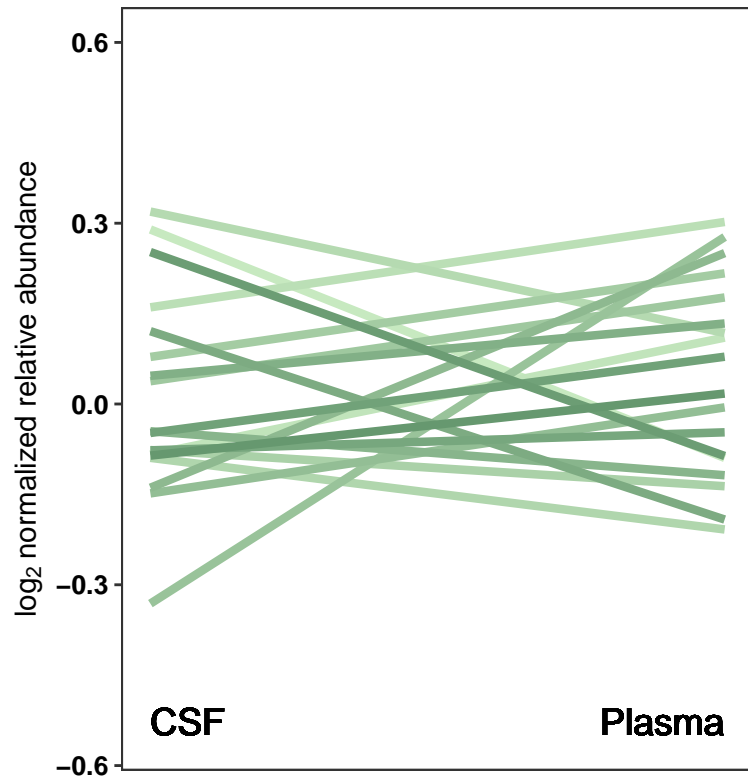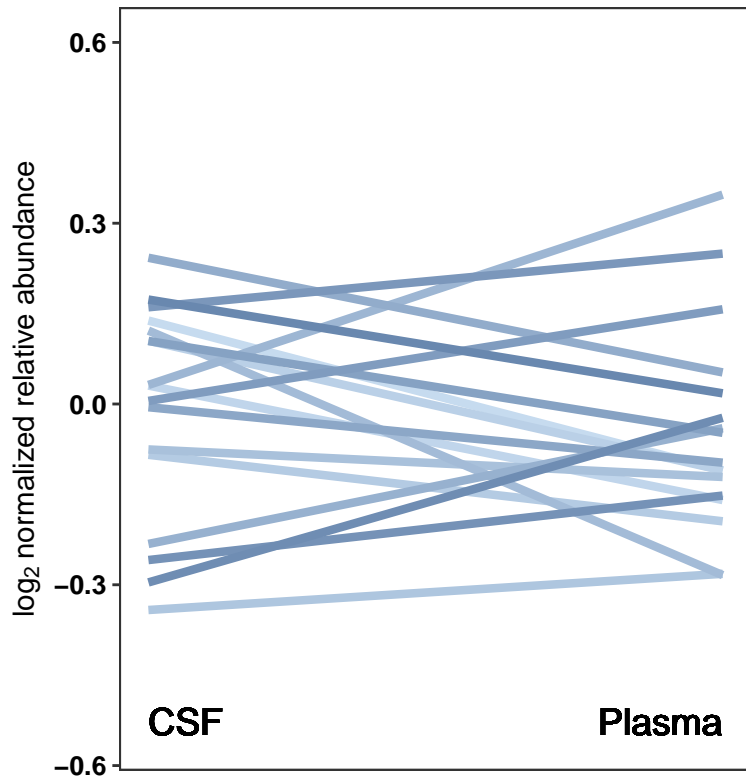

# M23 darkturquoise: Carbohydrate Binding/ECM

slopeDiff(AD-CT): 0.0583

Normal:

AD:

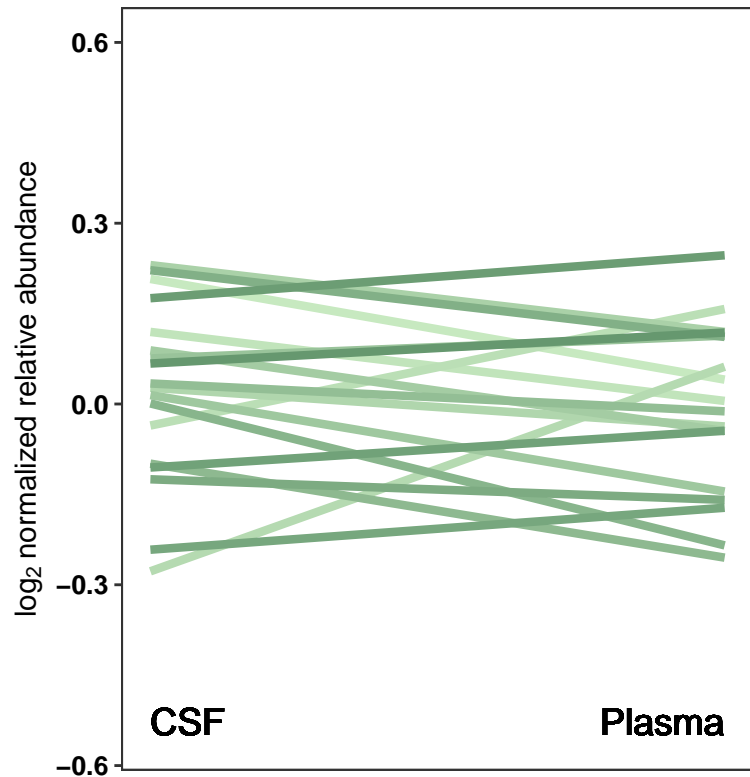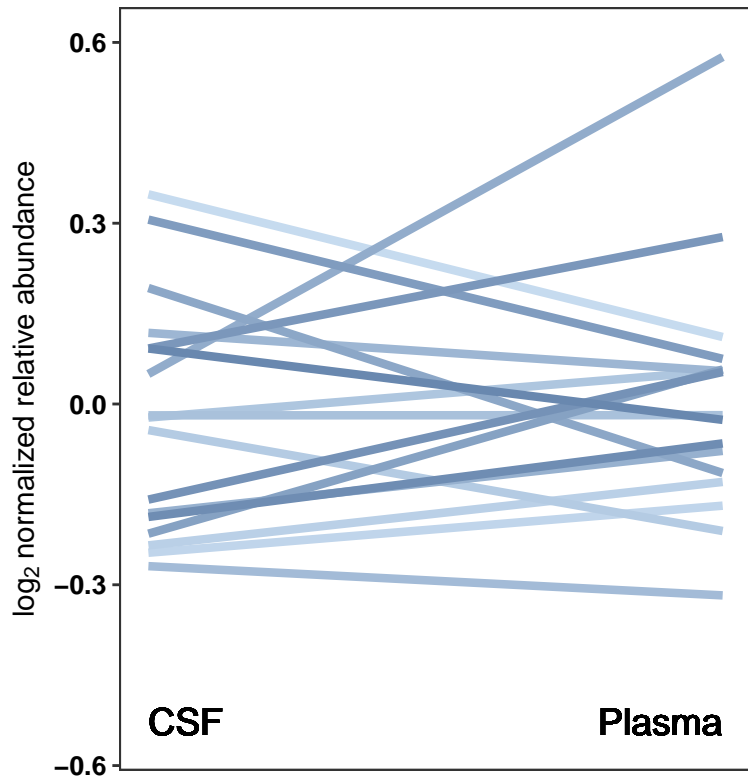

# M26 darkorange: Bicarbonate Transport/Peroxidase

slopeDiff(AD-CT): 0.0507

Normal:

AD:

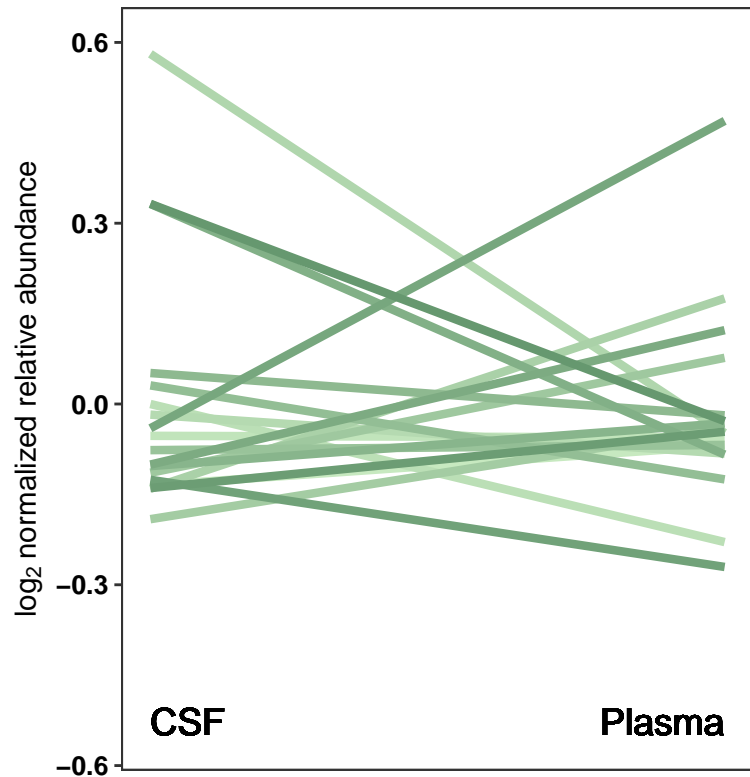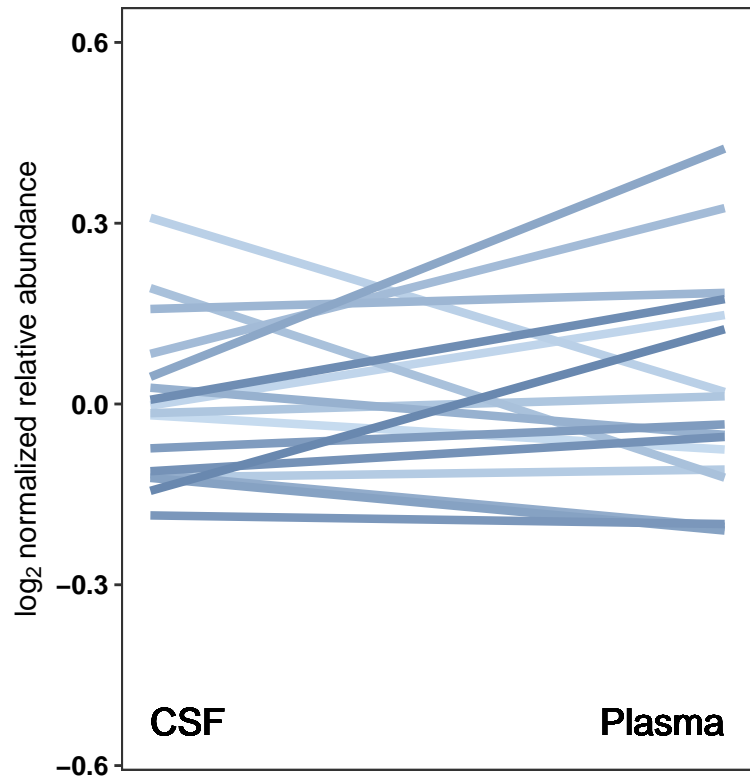



# M13 salmon: Ambiguous

slopeDiff(AD-CT): -0.0419

Normal:

AD:

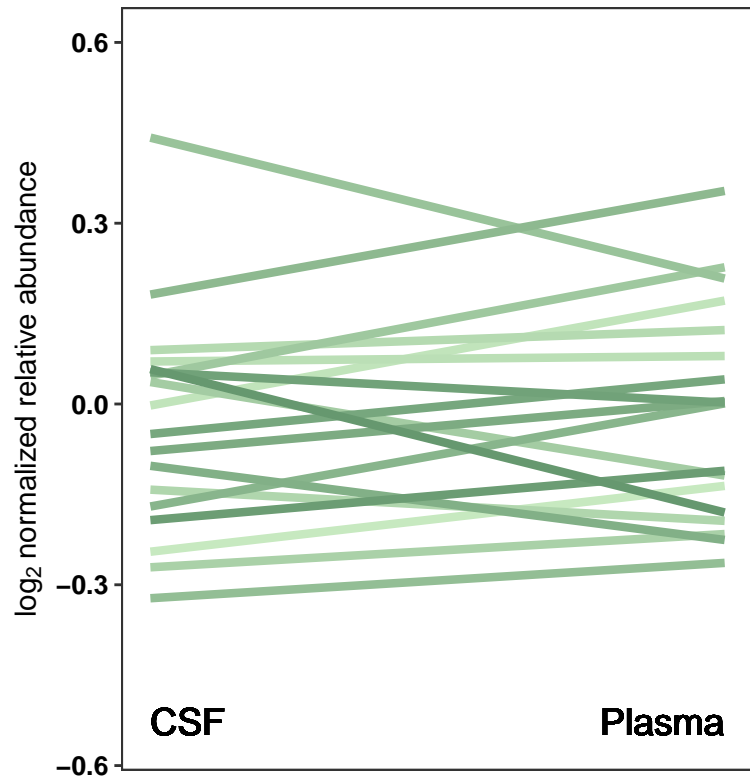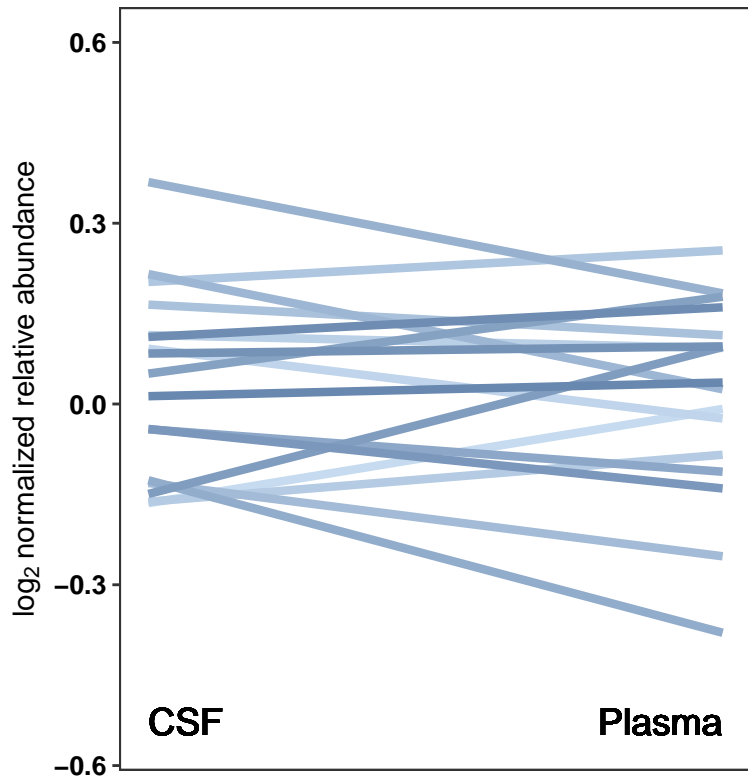

# M7 black: TNF/Ephrin Signaling

slopeDiff(AD-CT): 0.0416

Normal:

AD:

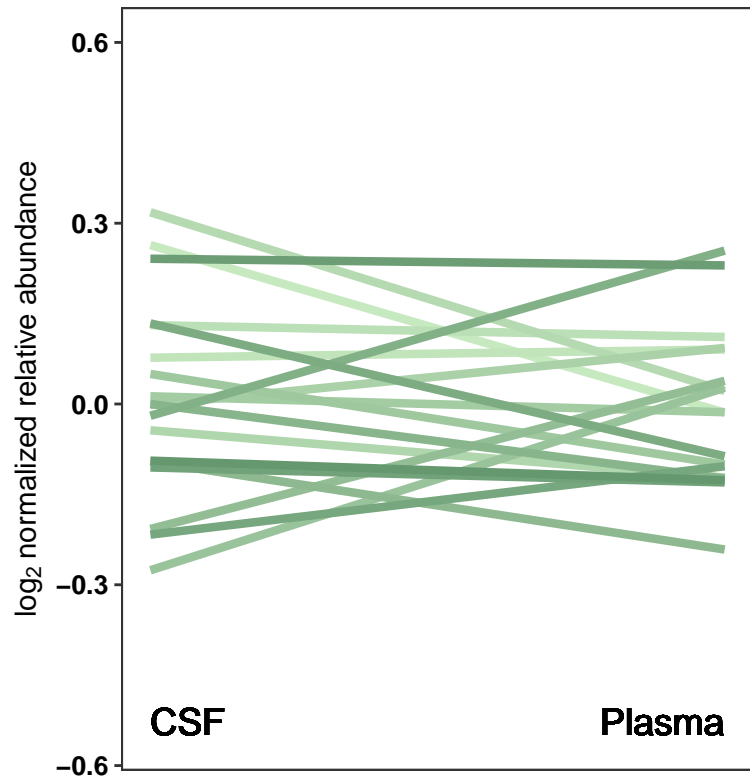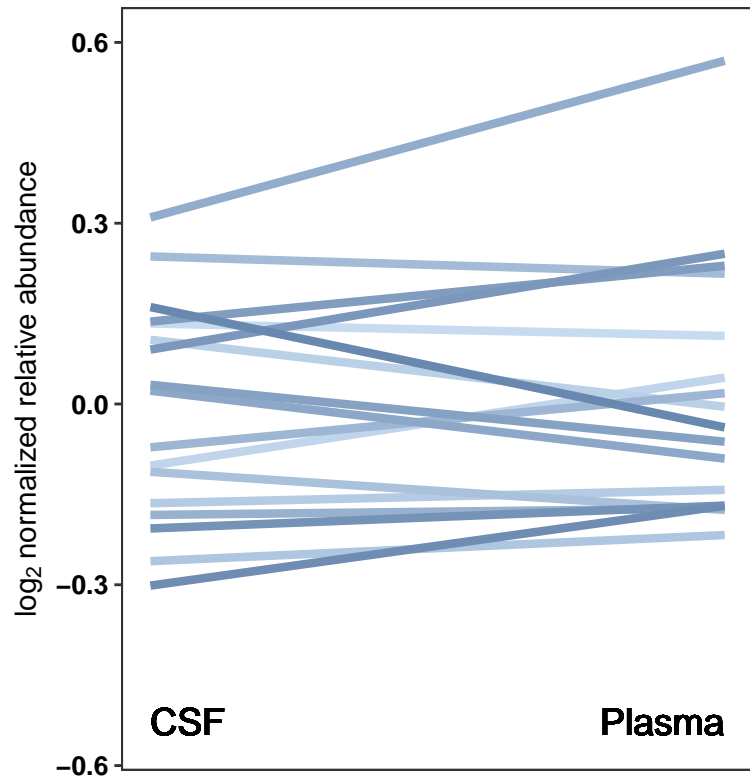



# M31 paleturquoise: Adhesion/ECM

slopeDiff(AD-CT): 0.0308

Normal:

AD:

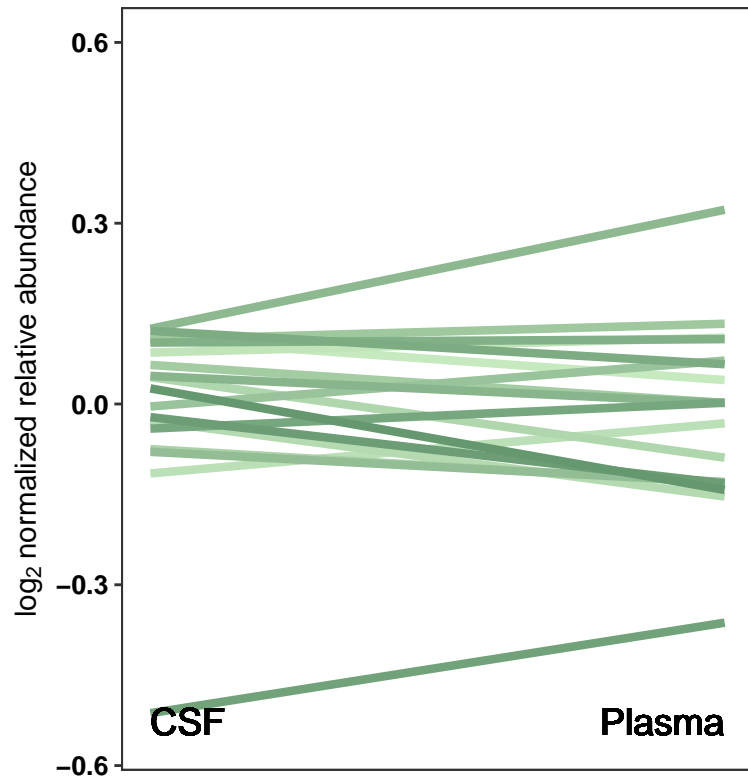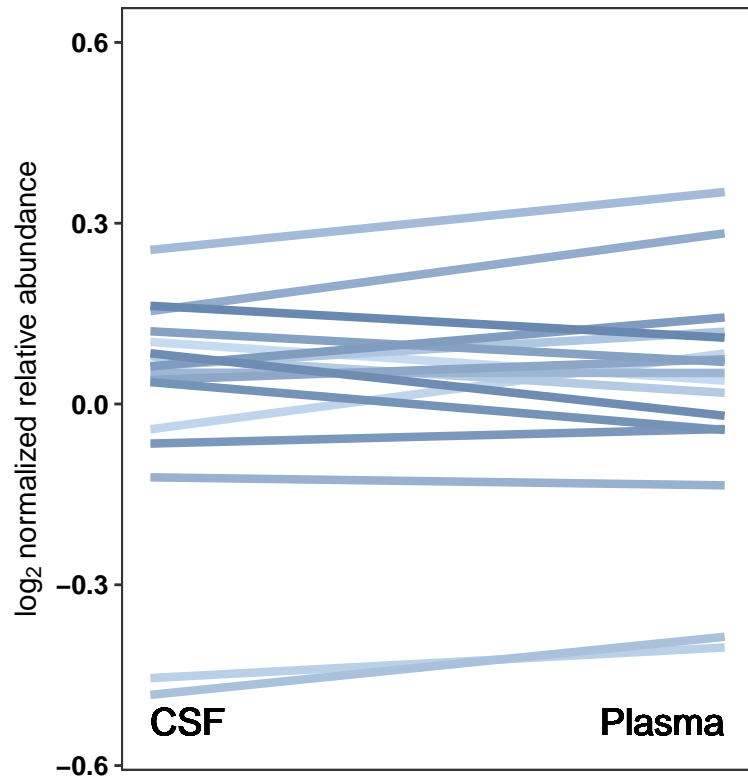

**M17 grey60.MEGATMT488  
Transcription**

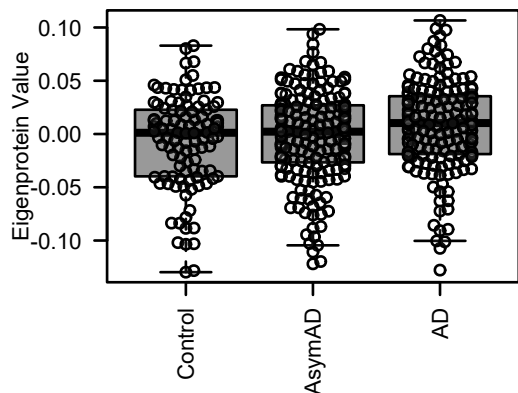

**MEgrey60.CSF 35 Samp. (Synthetic)  
ANOVA p: 0.29**

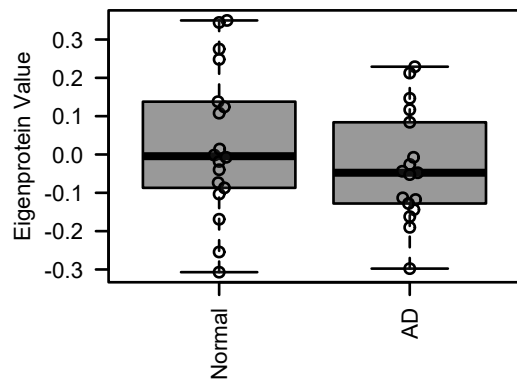

**MEgrey60.CSF (Synthetic)  
ANOVA p: 0.011**

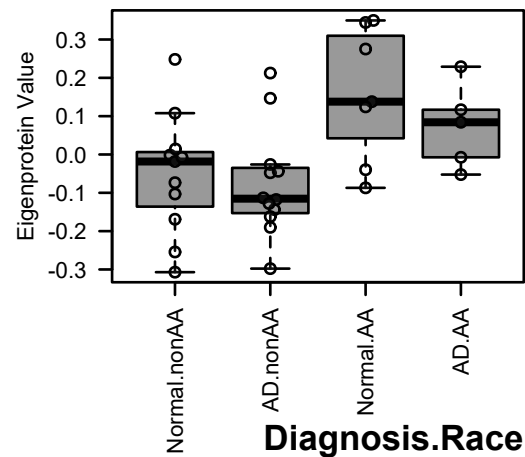

**MEgrey60.CSF (Synthetic)  
ANOVA p: 0.038**

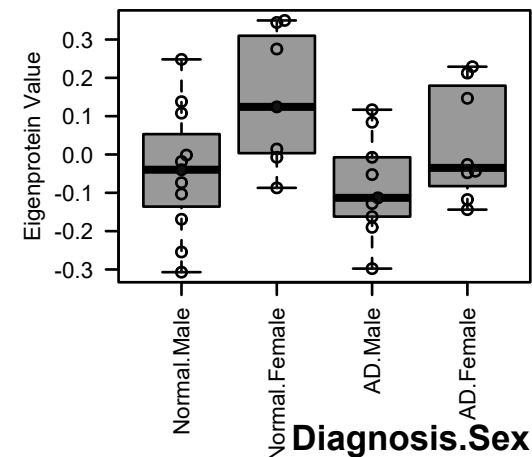

**bicor=0.41, p=0.014  
cor=0.42, p=0.012**

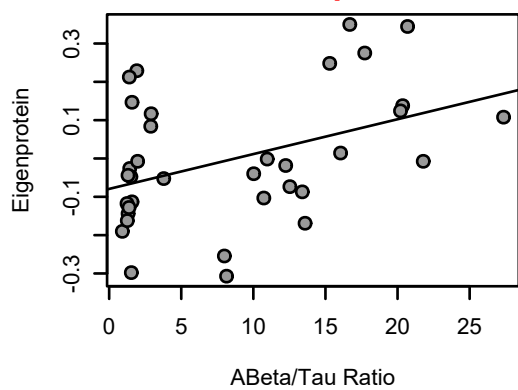

**bicor=0.07, p=0.71  
cor=-0.0091, p=0.96**

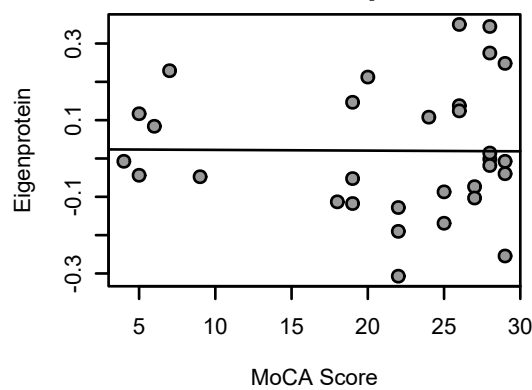

**bicor=-0.49, p=0.037  
cor=-0.49, p=0.039**

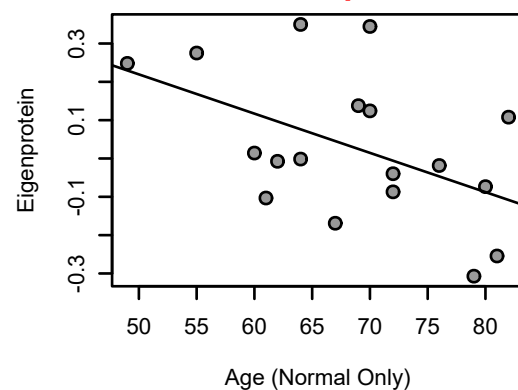

**bicor=-0.64, p=0.0053  
cor=-0.65, p=0.0047**

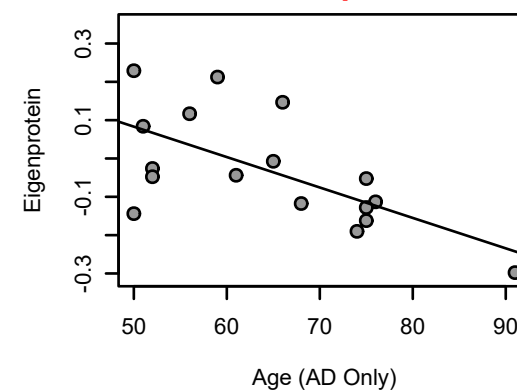

**M9 magenta.MEGATMT488  
Golgi**

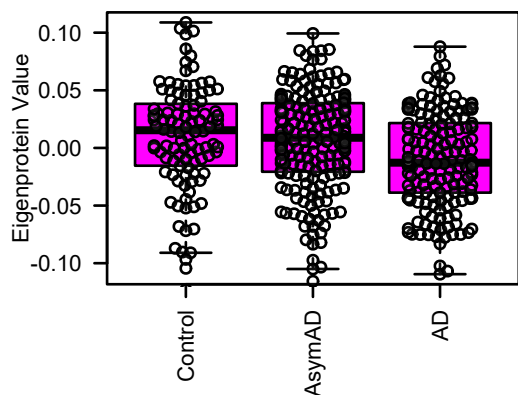

**MEmagenta.CSF 35 Samp. (Synthetic)  
ANOVA p: 0.13**

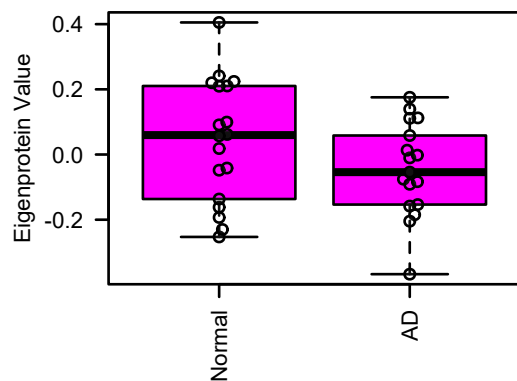

**MEmagenta.CSF (Synthetic)  
ANOVA p: 0.0035**

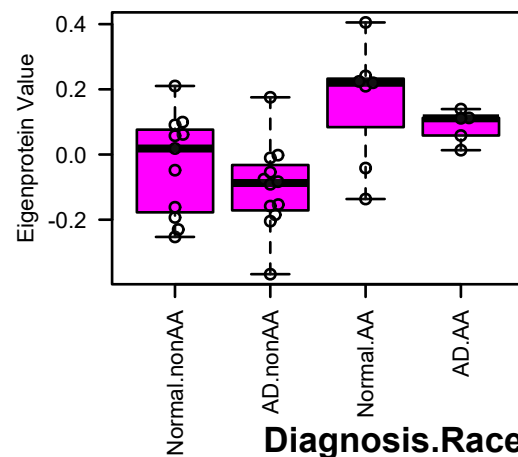

**MEmagenta.CSF (Synthetic)  
ANOVA p: 0.076**

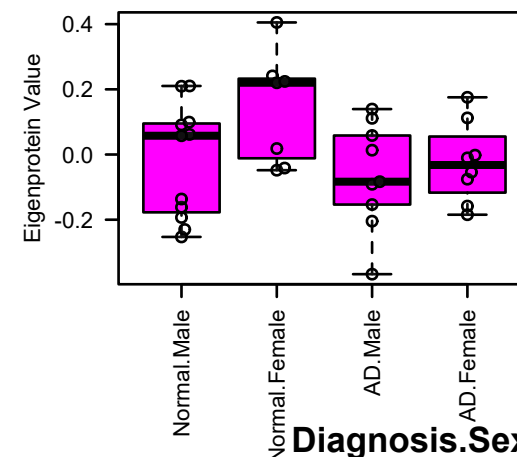

**bicor=0.47, p=0.004  
cor=0.48, p=0.0035**

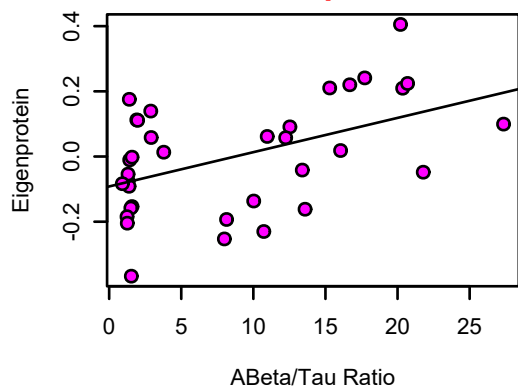

**bicor=0.19, p=0.31  
cor=0.039, p=0.83**

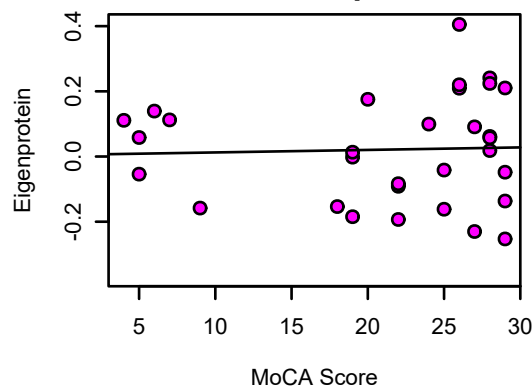

**bicor=-0.27, p=0.28  
cor=-0.29, p=0.24**

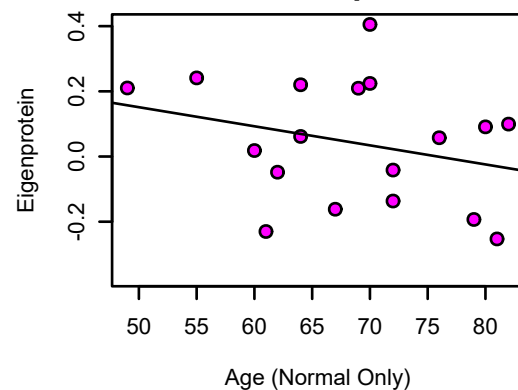

**bicor=-0.61, p=0.0097  
cor=-0.64, p=0.0057**

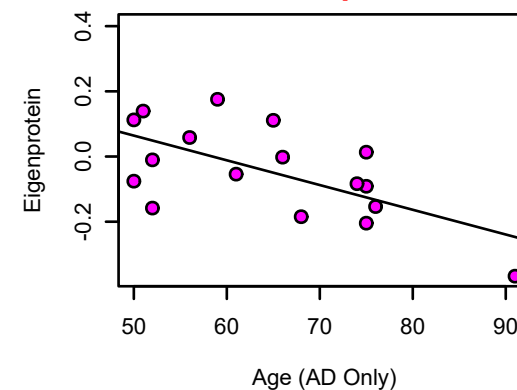

**M22 darkgreen.MEGATMT488**  
Post-Synaptic Density

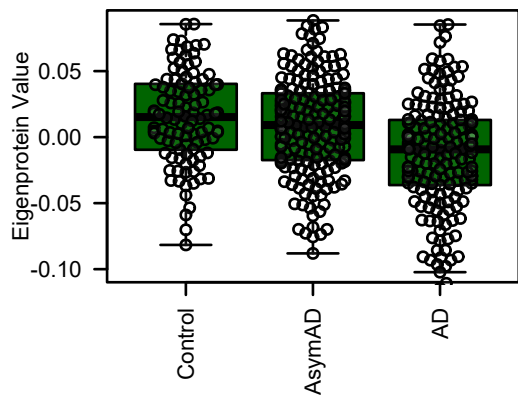

**MEdarkgreen.CSF 35 Samp. (Synthetic)**  
ANOVA p: 5e-06

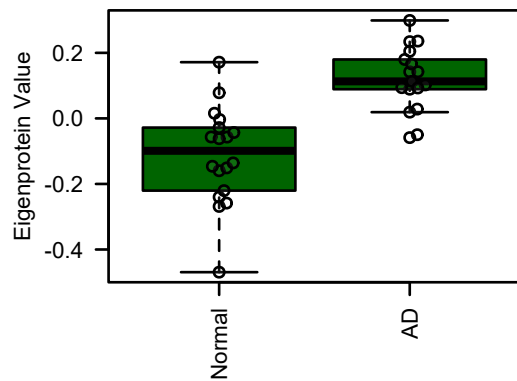

**MEdarkgreen.CSF (Synthetic)**  
ANOVA p: 8.4e-06

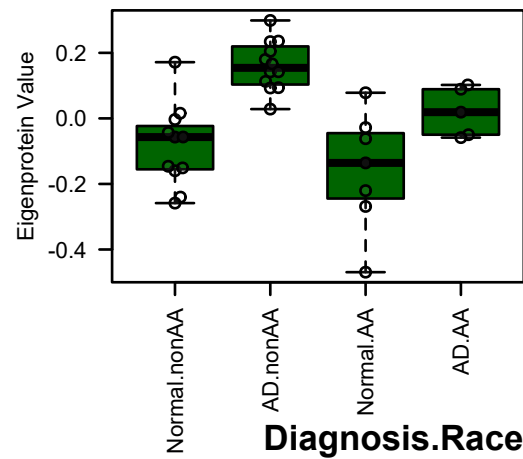

**MEdarkgreen.CSF (Synthetic)**  
ANOVA p: 5.1e-05

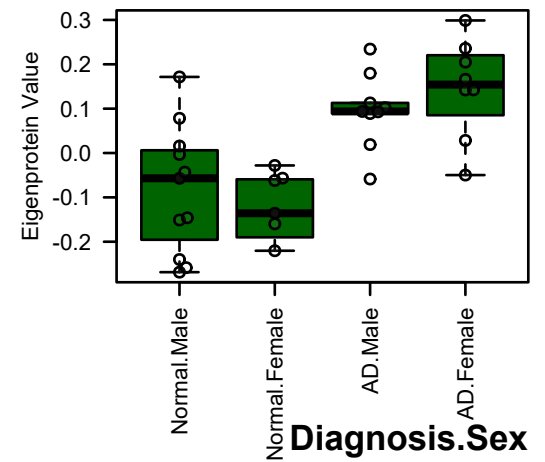

**bicor=-0.78, p=3.9e-08**  
**cor=-0.76, p=1.2e-07**

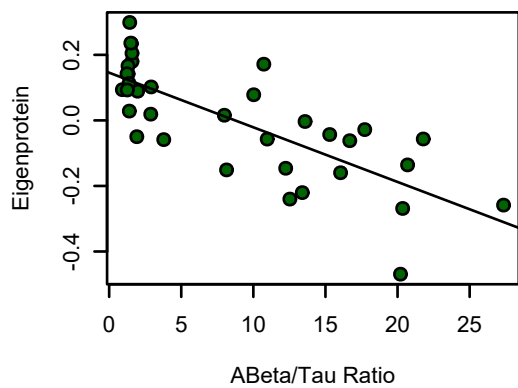

**bicor=-0.49, p=0.005**  
**cor=-0.46, p=0.0092**

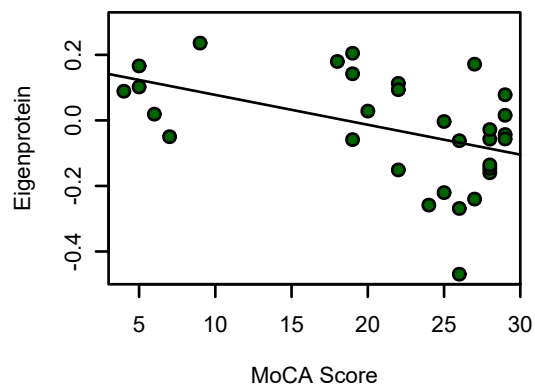

**bicor=-0.39, p=0.11**  
**cor=-0.35, p=0.15**

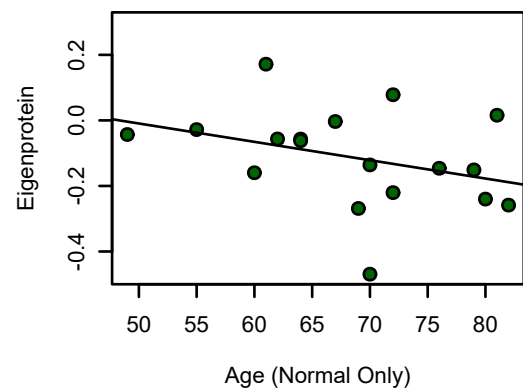

**bicor=0.088, p=0.74**  
**cor=0.092, p=0.73**

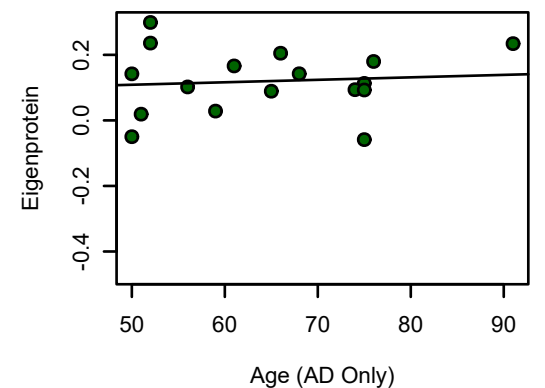

**M5 green.MEGATMT488**  
Post-Synaptic Density

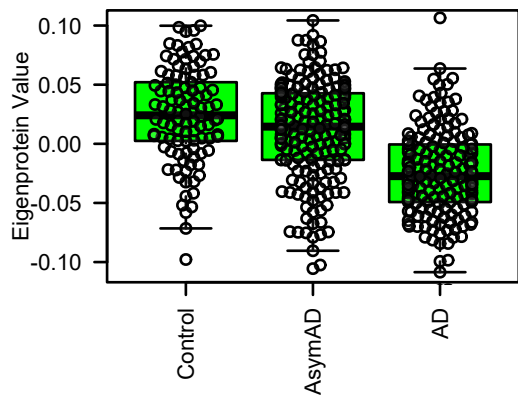

**MEgreen.CSF 35 Samp. (Synthetic)**  
ANOVA p: 0.098

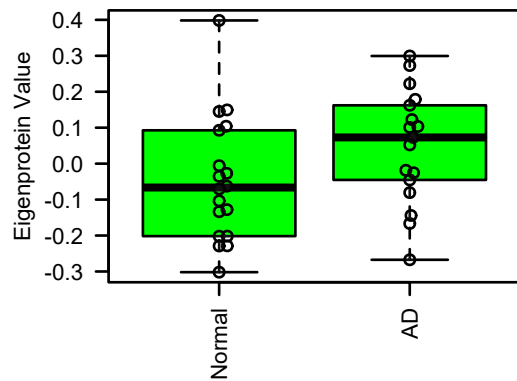

**MEgreen.CSF (Synthetic)**  
ANOVA p: 0.0013

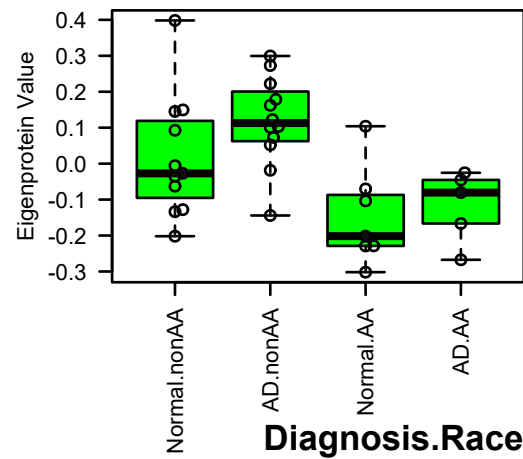

**MEgreen.CSF (Synthetic)**  
ANOVA p: 0.045

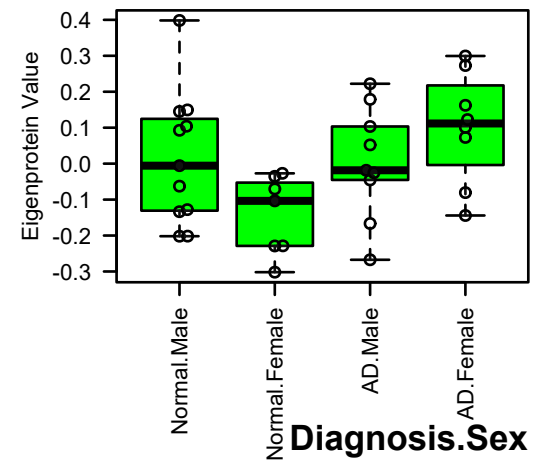

**bicor=-0.49, p=0.0031**  
**cor=-0.48, p=0.0035**

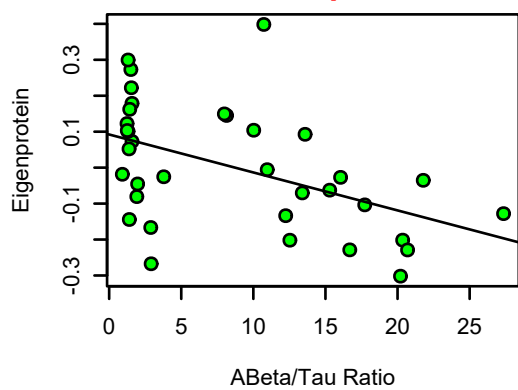

**bicor=-0.21, p=0.25**  
**cor=-0.039, p=0.83**

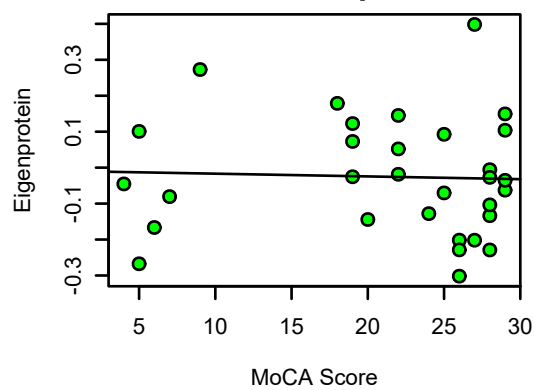

**bicor=-0.046, p=0.86**  
**cor=-0.052, p=0.84**

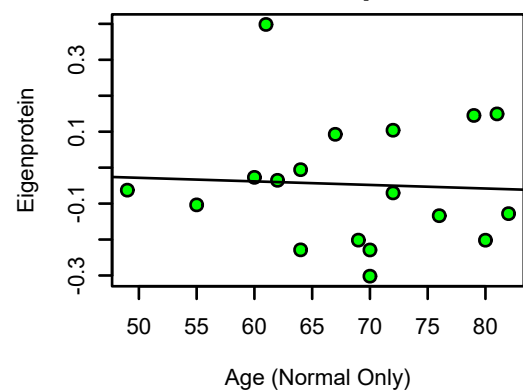

**bicor=0.19, p=0.47**  
**cor=0.2, p=0.44**

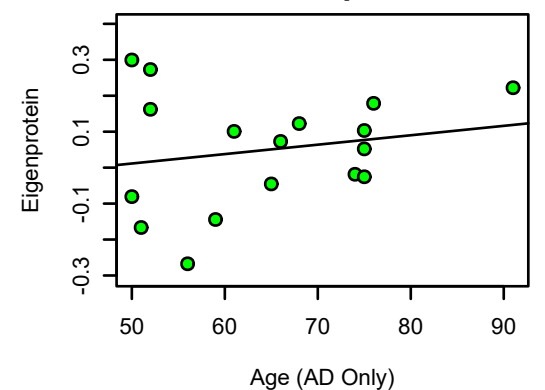

**M10 purple.MEGATMT488**  
**Ambiguous**

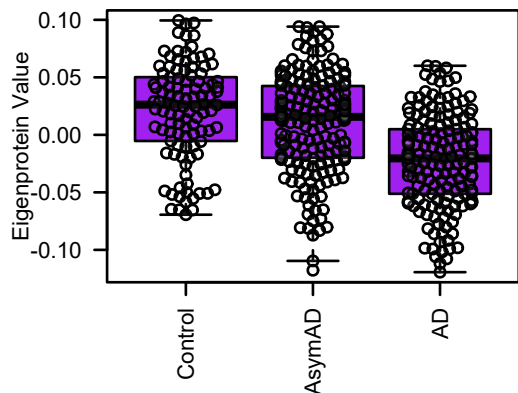

**MEpurple.CSF 35 Samp. (Synthetic)**  
**ANOVA p: 0.22**

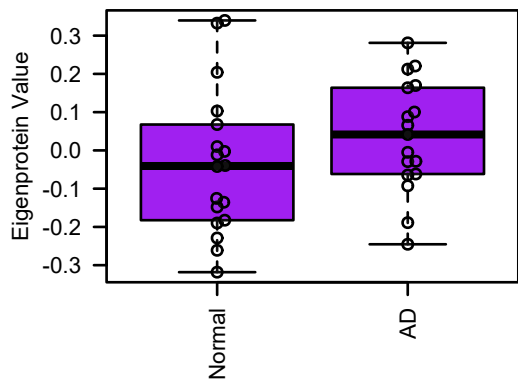

**MEpurple.CSF (Synthetic)**  
**ANOVA p: 0.011**

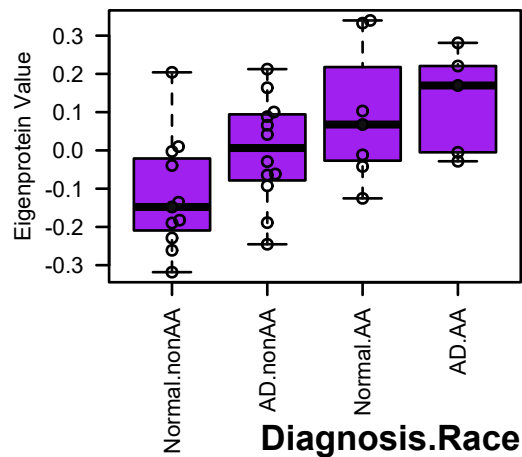

**MEpurple.CSF (Synthetic)**  
**ANOVA p: 0.034**

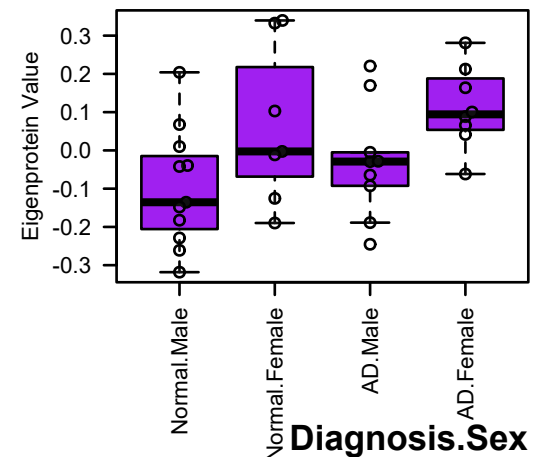

**bicor=0.017, p=0.92**  
**cor=0.042, p=0.81**

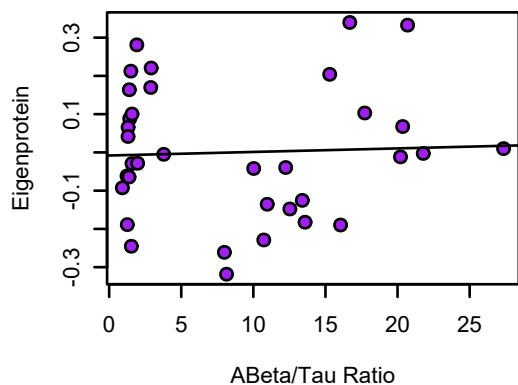

**bicor=-0.28, p=0.13**  
**cor=-0.35, p=0.054**

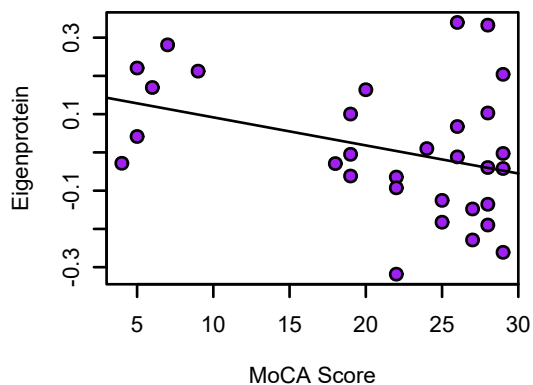

**bicor=-0.37, p=0.13**  
**cor=-0.38, p=0.12**

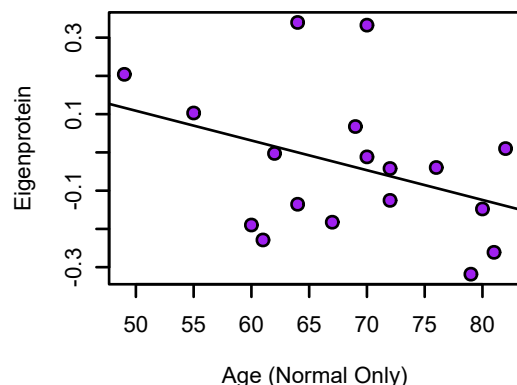

**bicor=-0.87, p=6.1e-06**  
**cor=-0.87, p=5.7e-06**

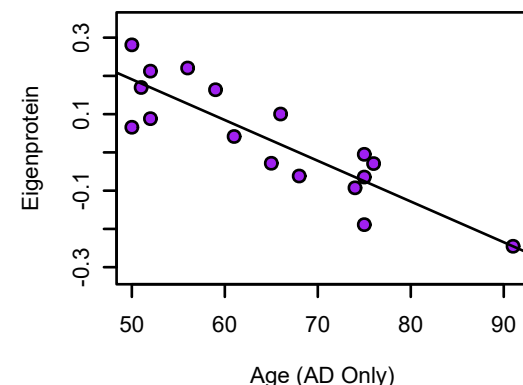

**M29 saddlebrown.MEGATMT488**  
**Glycosylation/ER**

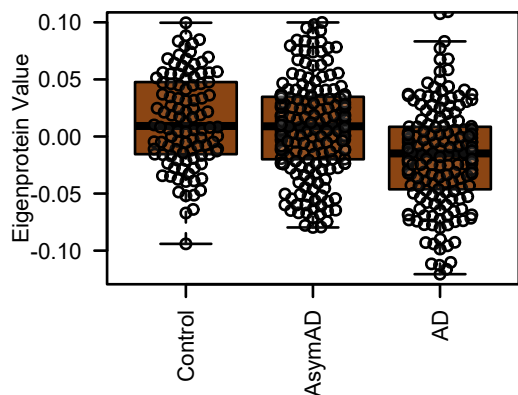

**MEsaddlebrown.CSF 35 Samp. (Synthetic)**  
**ANOVA p: 0.97**

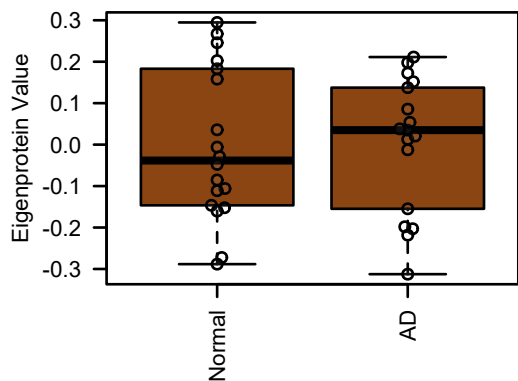

**MEsaddlebrown.CSF (Synthetic)**  
**ANOVA p: 9e-04**

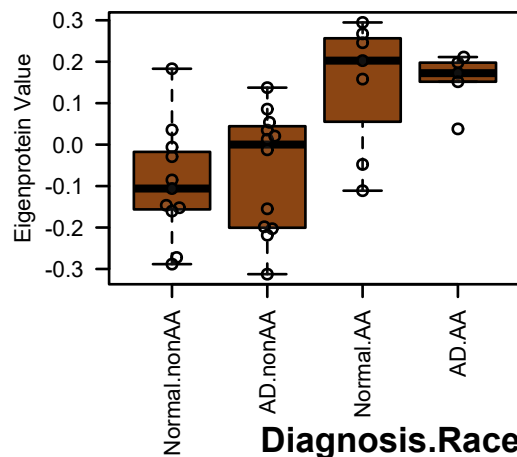

**MEsaddlebrown.CSF (Synthetic)**  
**ANOVA p: 0.17**

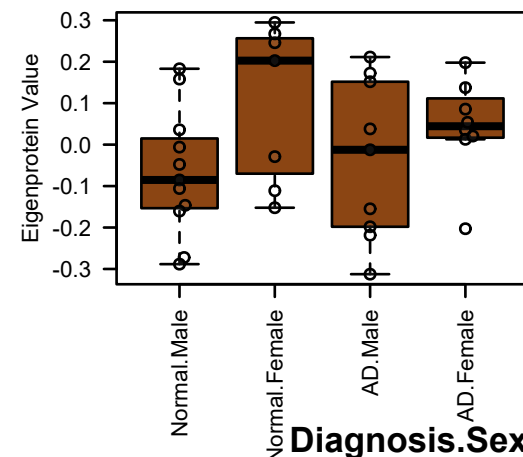

**bicor=0.21, p=0.22**  
**cor=0.23, p=0.18**

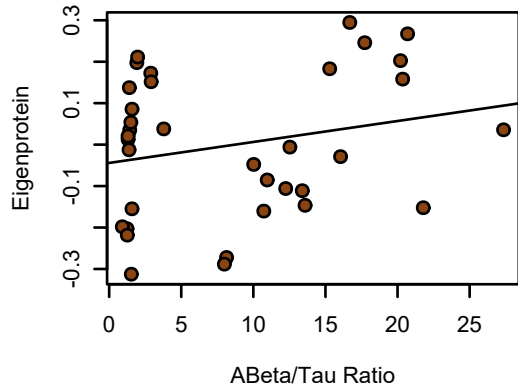

**bicor=-0.059, p=0.75**  
**cor=-0.27, p=0.14**

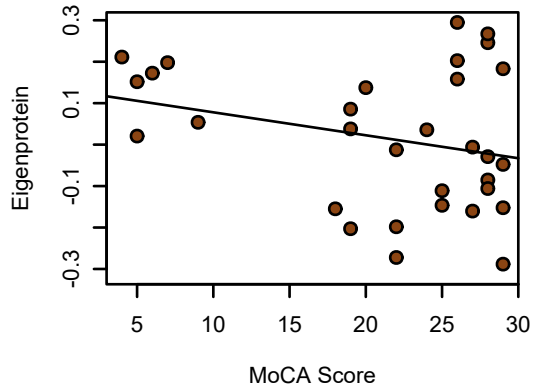

**bicor=-0.4, p=0.1**  
**cor=-0.41, p=0.091**

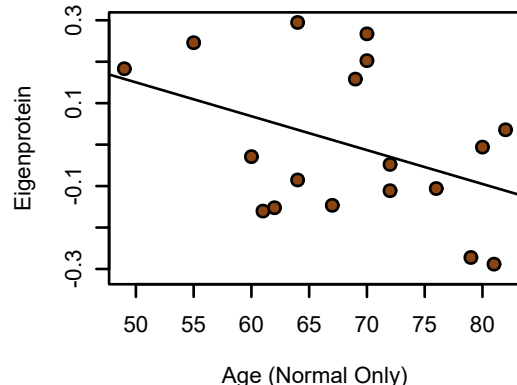

**bicor=-0.7, p=0.0017**  
**cor=-0.74, p=0.00068**

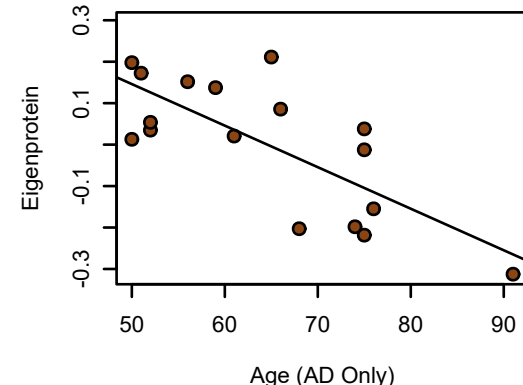

**M24 darkgrey.MEGATMT488**  
**Ubiquitination**

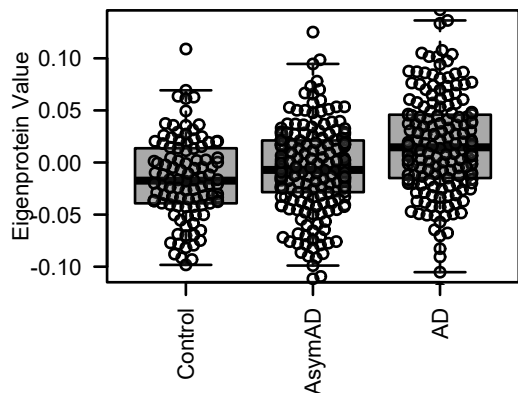

**MEdarkgrey.CSF 35 Samp. (Synthetic)**  
**ANOVA p: 1.7e-06**

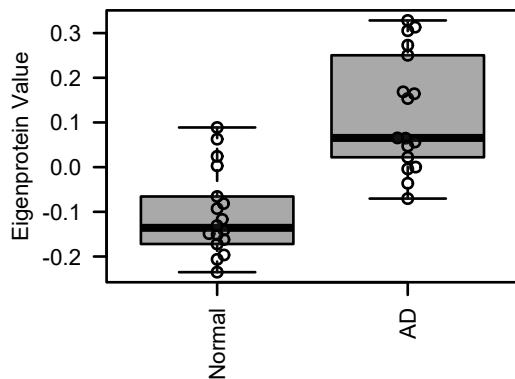

**MEdarkgrey.CSF (Synthetic)**  
**ANOVA p: 2.9e-06**

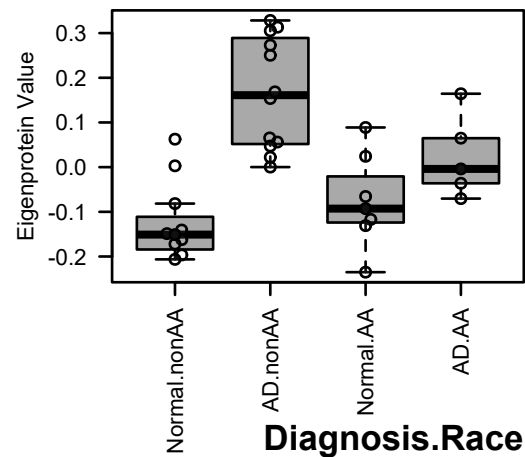

**MEdarkgrey.CSF (Synthetic)**  
**ANOVA p: 1.3e-05**

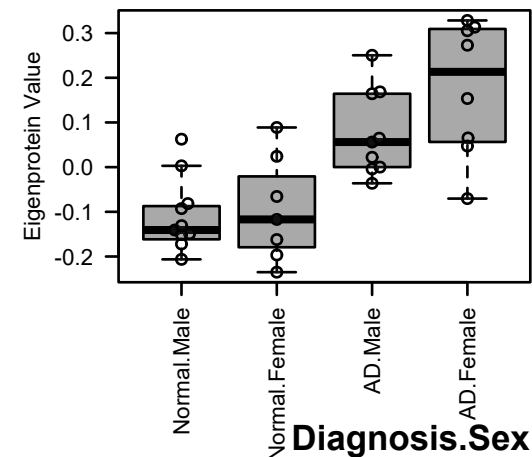

**bicor=-0.6, p=0.00012**  
**cor=-0.58, p=0.00026**

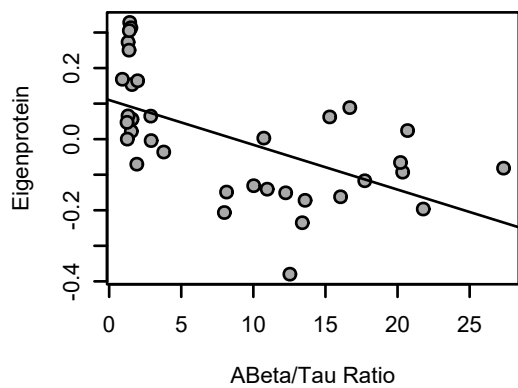

**bicor=-0.62, p=0.00023**  
**cor=-0.49, p=0.0051**

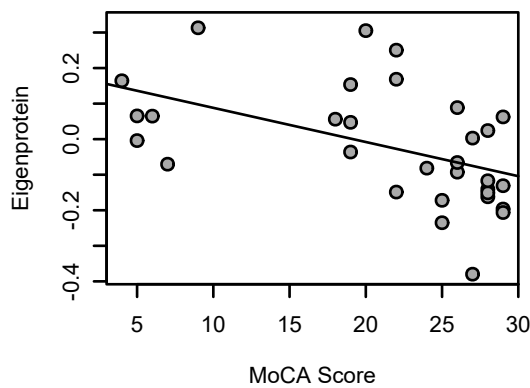

**bicor=-0.46, p=0.057**  
**cor=-0.49, p=0.039**

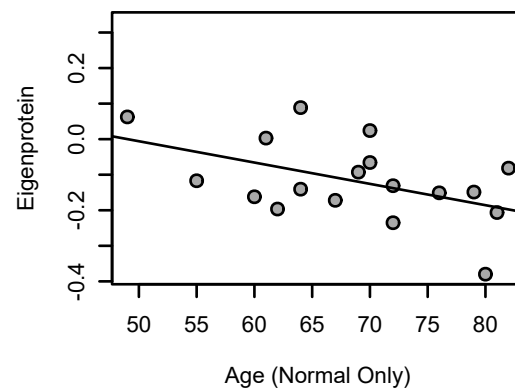

**bicor=-0.3, p=0.24**  
**cor=-0.32, p=0.21**

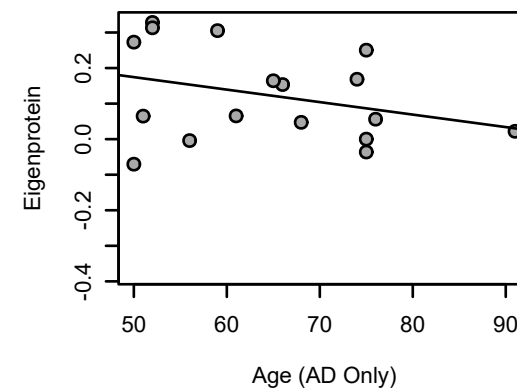

**M19 lightyellow.MEGATMT488**  
**Axonogenesis**

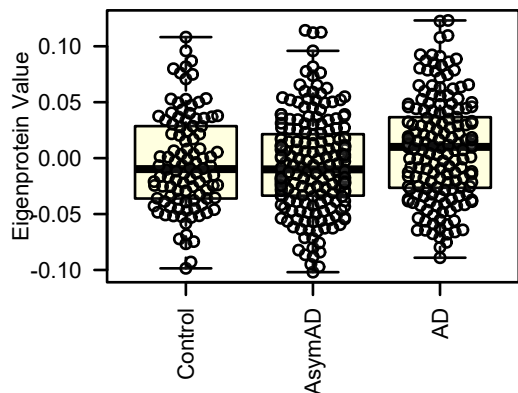

**MElightyellow.CSF 35 Samp. (Synthetic)**  
**ANOVA p: 0.41**

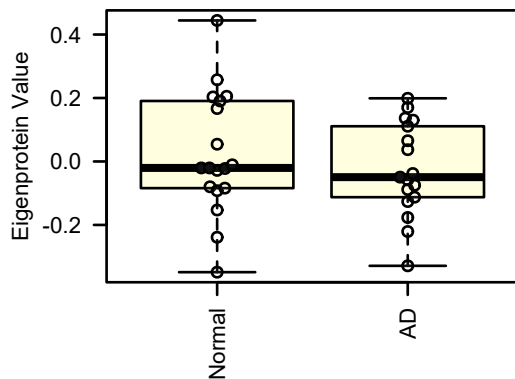

**MElightyellow.CSF (Synthetic)**  
**ANOVA p: 0.0029**

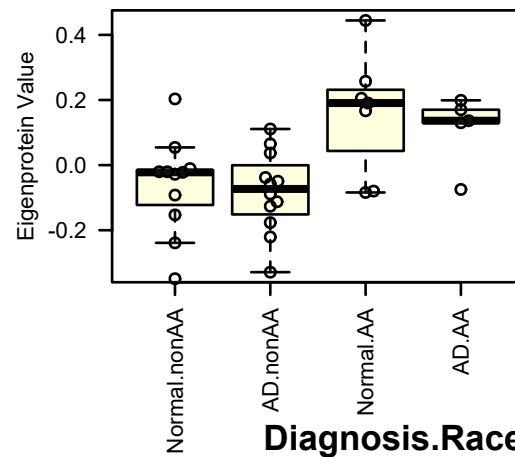

**MElightyellow.CSF (Synthetic)**  
**ANOVA p: 0.11**

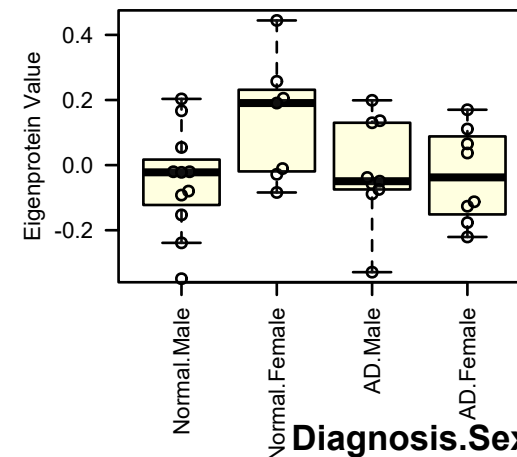

**bicor=0.38, p=0.023**  
**cor=0.41, p=0.014**

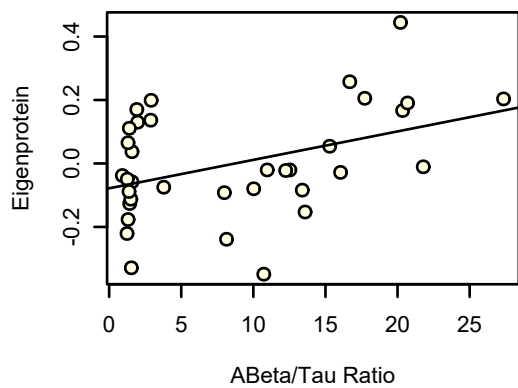

**bicor=-0.025, p=0.89**  
**cor=-0.16, p=0.39**

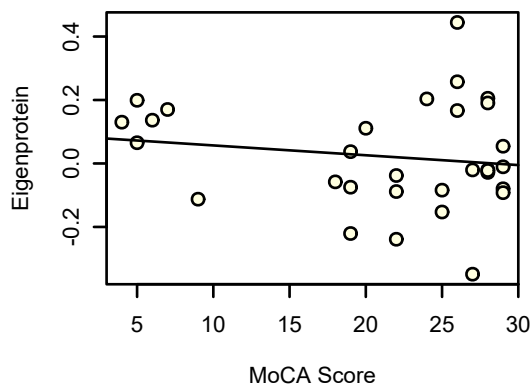

**bicor=-0.14, p=0.58**  
**cor=-0.086, p=0.73**

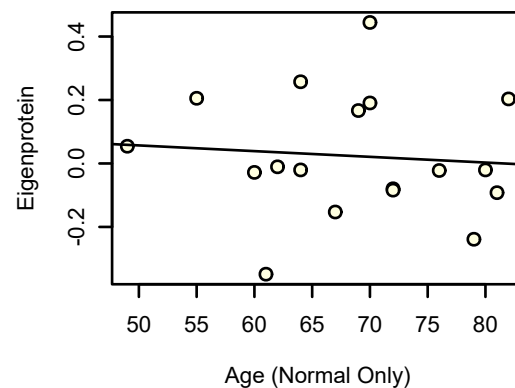

**bicor=-0.46, p=0.064**  
**cor=-0.49, p=0.046**

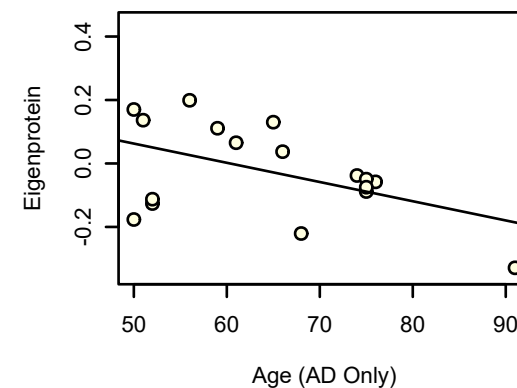



**M7 black.MEGATMT488**  
**MAPK/Metabolism**

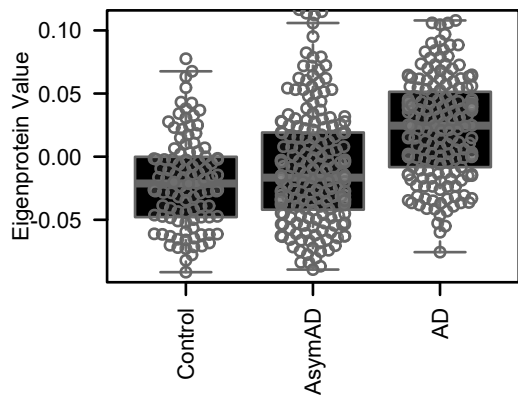

**MEblack.CSF 35 Samp. (Synthetic)**  
**ANOVA p: 0.71**

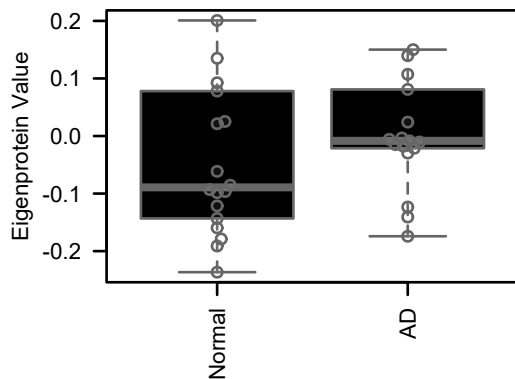

**MEblack.CSF (Synthetic)**  
**ANOVA p: 0.054**

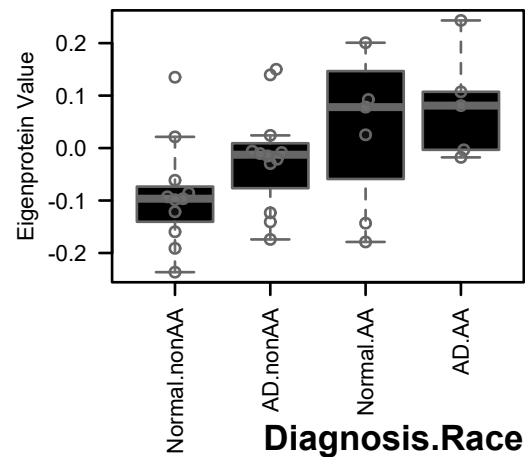

**MEblack.CSF (Synthetic)**  
**ANOVA p: 0.38**

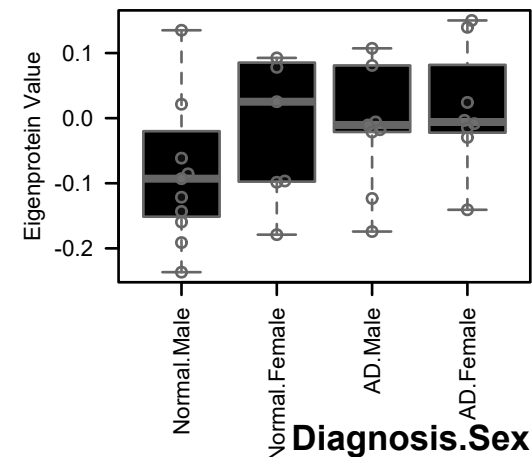

**bicor=0.033, p=0.85**  
**cor=0.21, p=0.23**

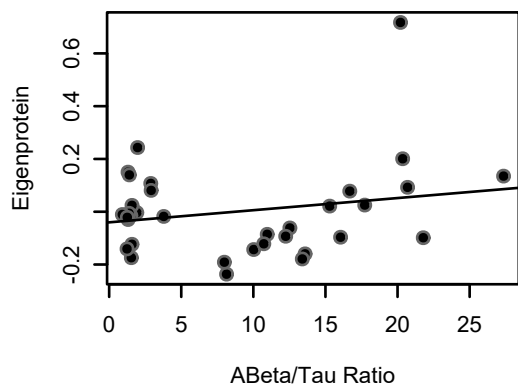

**bicor=-0.22, p=0.24**  
**cor=-0.23, p=0.21**

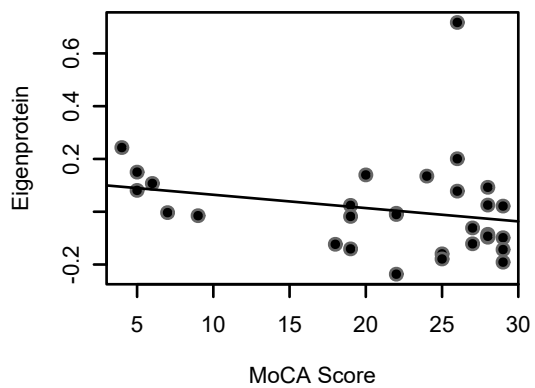

**bicor=-0.23, p=0.35**  
**cor=-0.07, p=0.78**

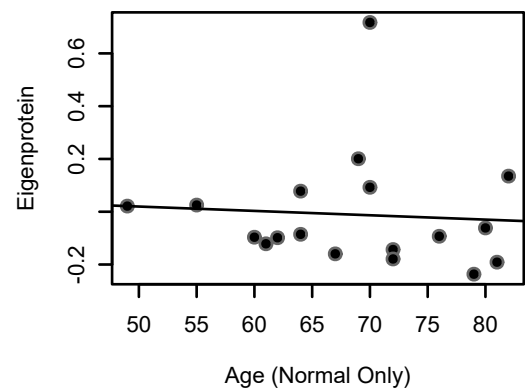

**bicor=-0.54, p=0.025**  
**cor=-0.46, p=0.063**

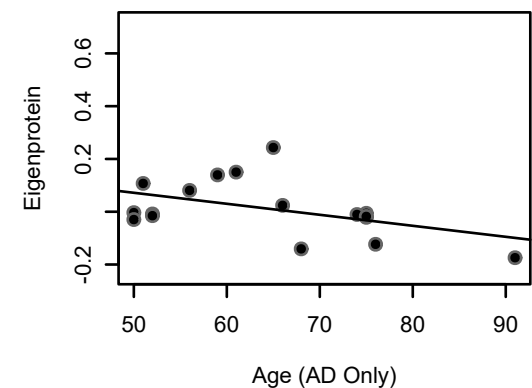

**M15 midnightblue.MEGATMT488**  
**Ambiguous**

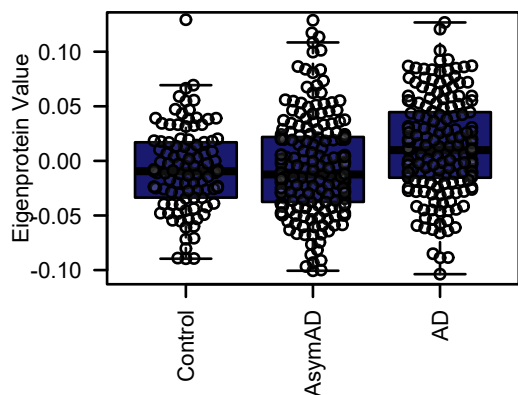

**MEmidnightblue.CSF 35 Samp. (Synthetic)**  
**ANOVA p: 0.1**

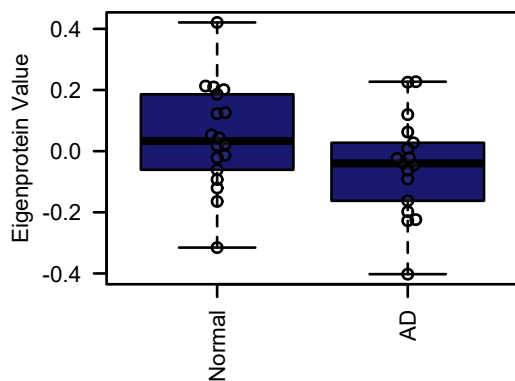

**MEMidnightblue.CSF (Synthetic)**  
**ANOVA p: 0.023**

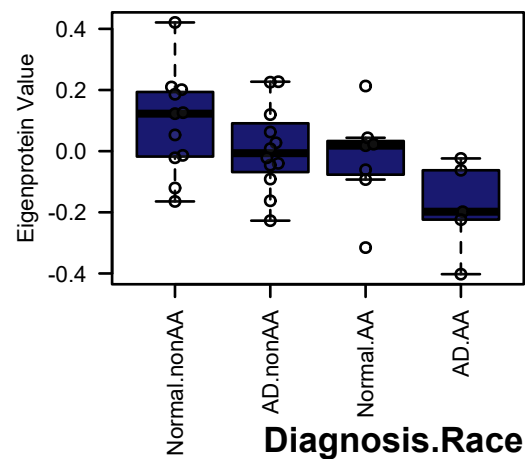

**MEMidnightblue.CSF (Synthetic)**  
**ANOVA p: 0.17**

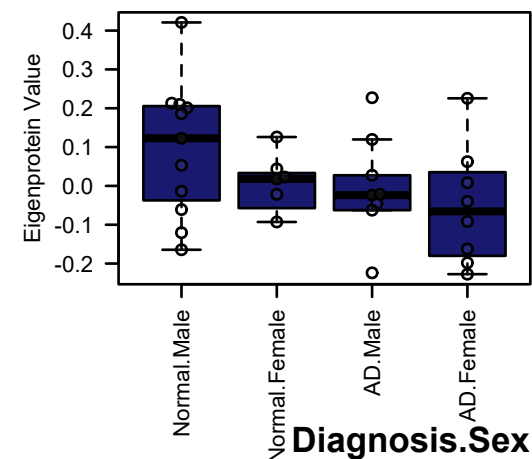

**bicor=0.07, p=0.69**  
**cor=0.056, p=0.75**

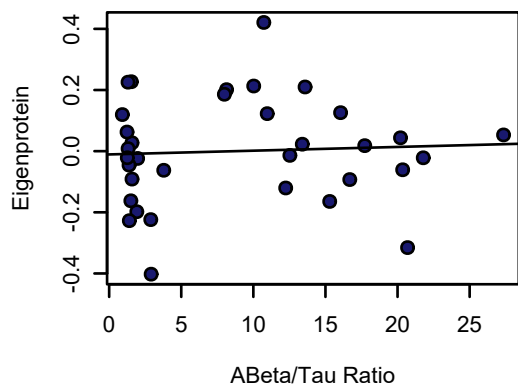

**bicor=0.26, p=0.16**  
**cor=0.35, p=0.054**

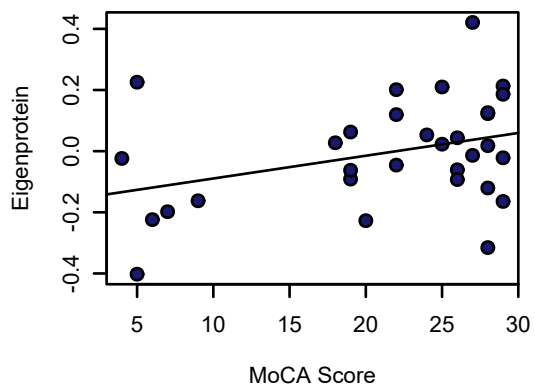

**bicor=0.12, p=0.64**  
**cor=0.11, p=0.66**

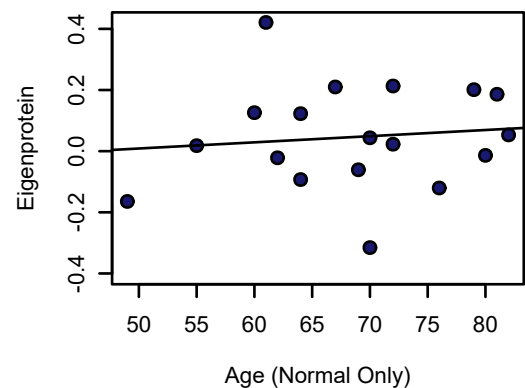

**bicor=0.6, p=0.011**  
**cor=0.58, p=0.015**

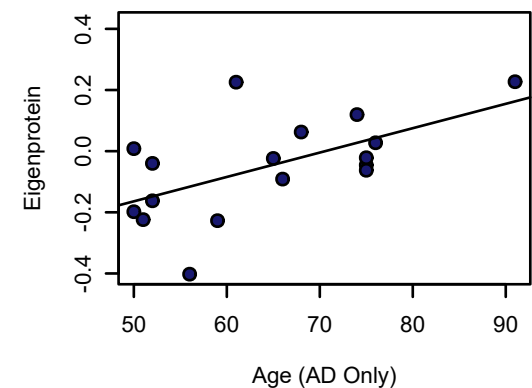

**M23 darkturquoise.MEGATMT488**  
Ambiguous

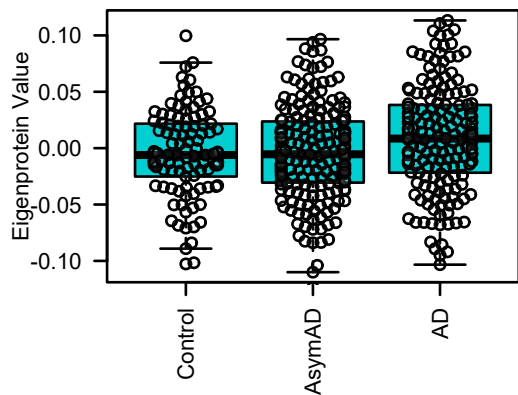

**MEdarkturquoise.CSF 35 Samp. (Synthetic)**  
ANOVA p: 0.0075

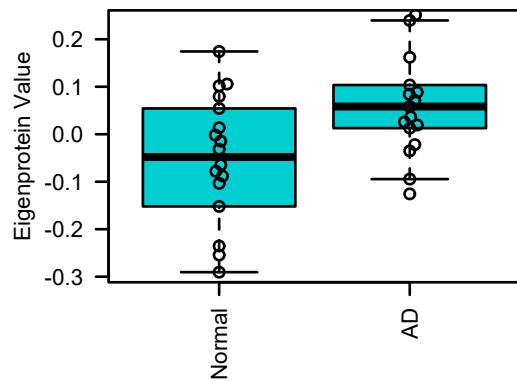

**MEdarkturquoise.CSF (Synthetic)**  
ANOVA p: 0.046

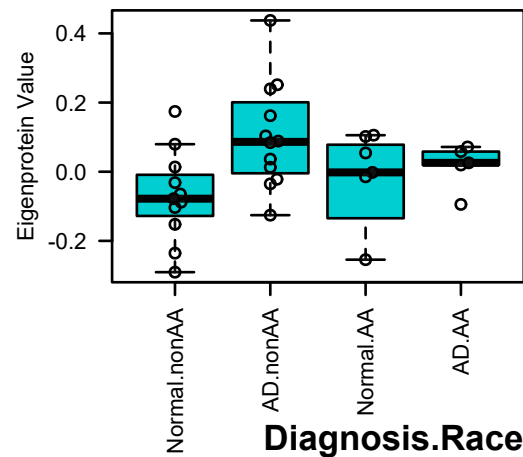

**MEdarkturquoise.CSF (Synthetic)**  
ANOVA p: 0.034

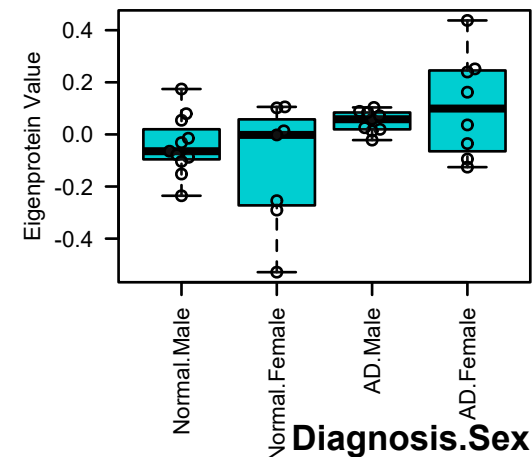

**bicor=-0.38, p=0.024**  
**cor=-0.42, p=0.012**

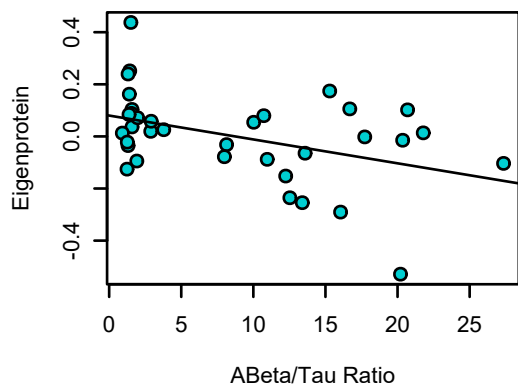

**bicor=-0.23, p=0.22**  
**cor=-0.29, p=0.11**

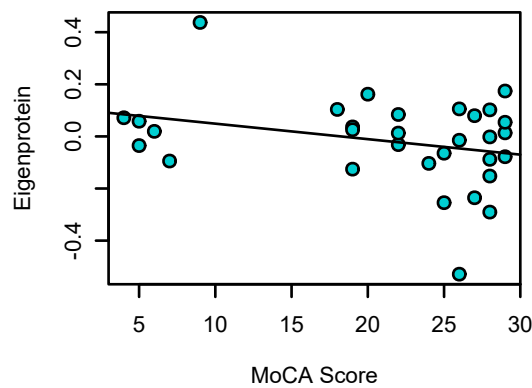

**bicor=-0.39, p=0.11**  
**cor=-0.35, p=0.15**

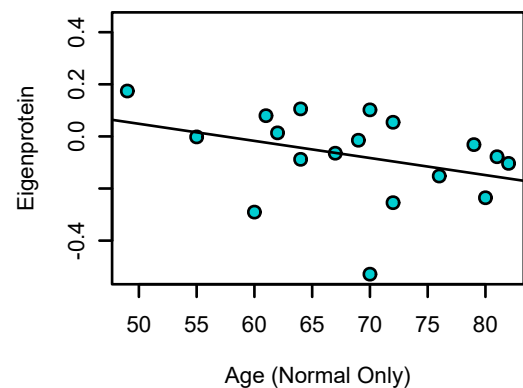

**bicor=-0.13, p=0.61**  
**cor=-0.3, p=0.24**

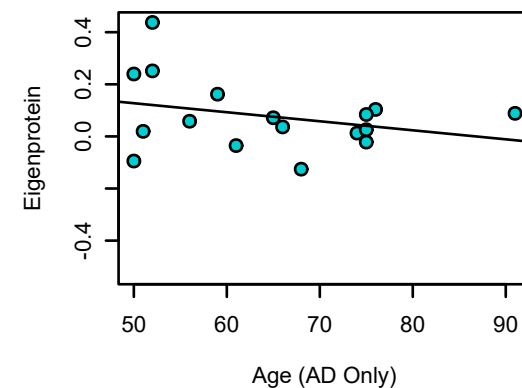

**M1 turquoise.MEGATMT488**  
Synapse/Neuron

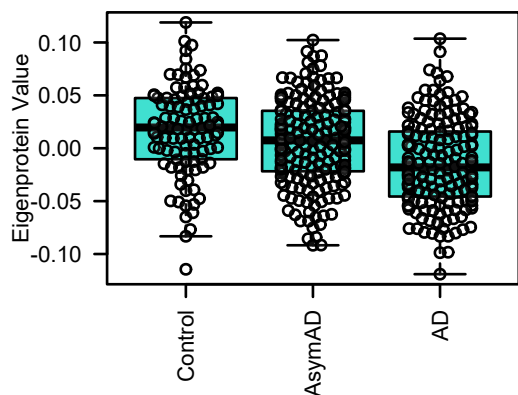

**MEturquoise.CSF 35 Samp. (Synthetic)**  
ANOVA p: 0.00055

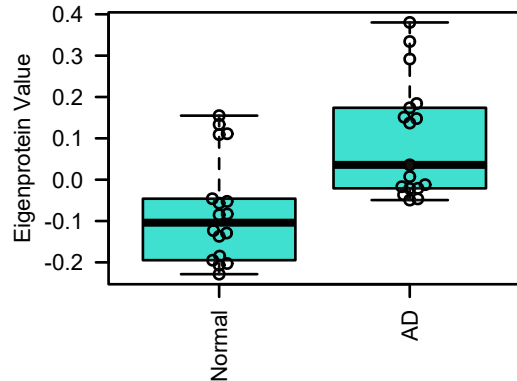

**MEturquoise.CSF (Synthetic)**  
ANOVA p: 0.0039

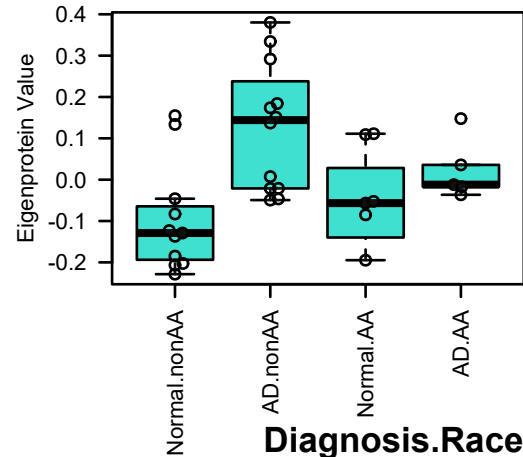

**MEturquoise.CSF (Synthetic)**  
ANOVA p: 0.00074

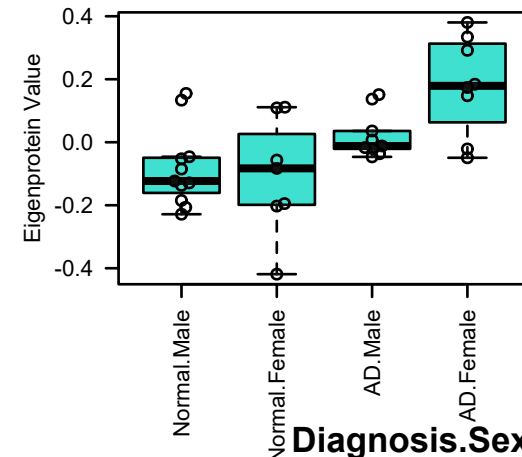

**bicor=-0.5, p=0.0021**  
**cor=-0.51, p=0.0017**

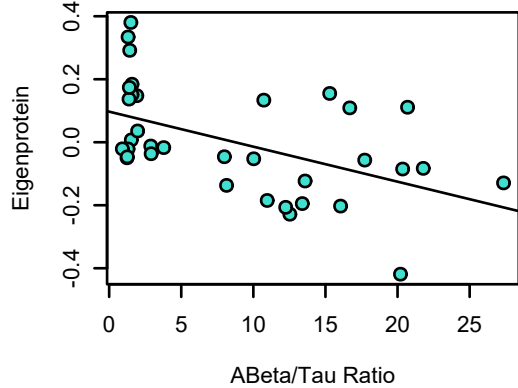

**bicor=-0.47, p=0.0081**  
**cor=-0.37, p=0.04**

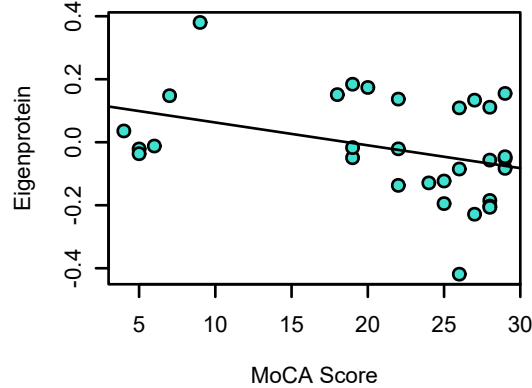

**bicor=-0.42, p=0.084**  
**cor=-0.42, p=0.083**

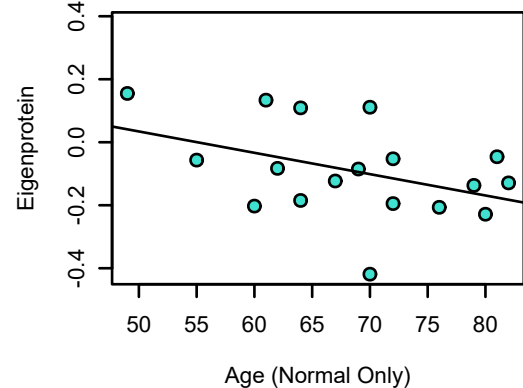

**bicor=-0.44, p=0.077**  
**cor=-0.48, p=0.051**

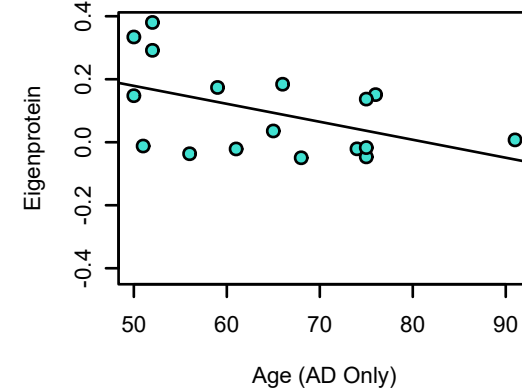

**M4 yellow.MEGATMT488**  
Synapse/Neuron

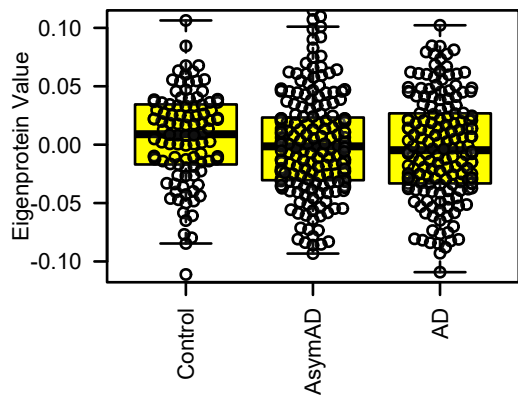

**MEyellow.CSF 35 Samp. (Synthetic)**  
ANOVA p: 0.036

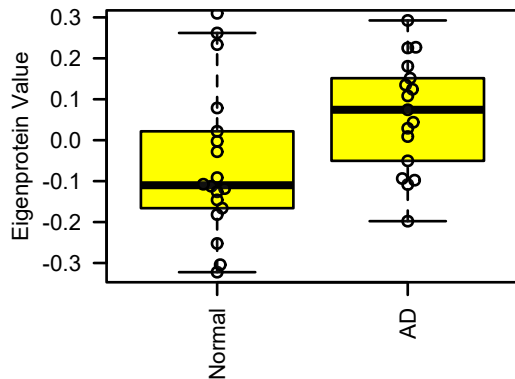

**MEyellow.CSF (Synthetic)**  
ANOVA p: 0.023

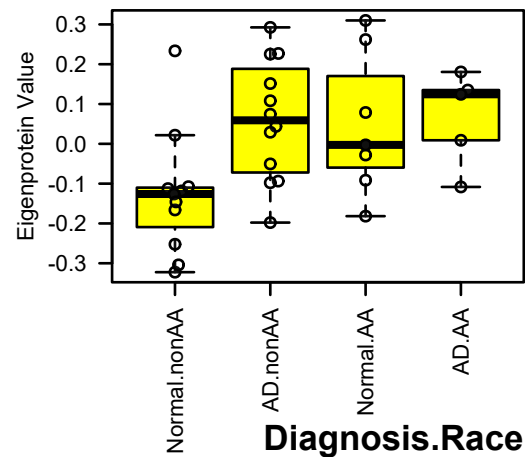

**MEyellow.CSF (Synthetic)**  
ANOVA p: 0.063

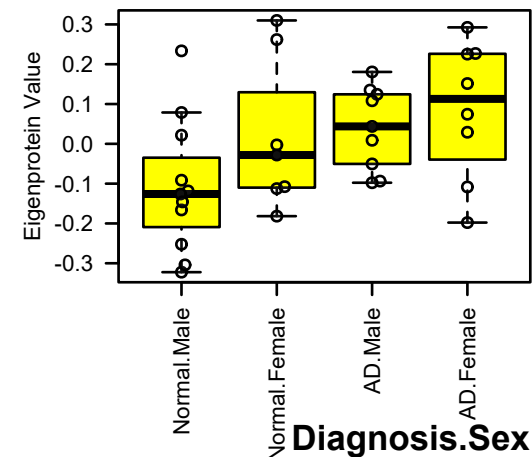

bicor=-0.13, p=0.47  
cor=-0.1, p=0.57

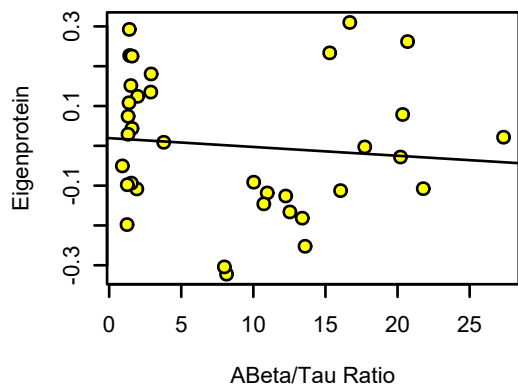

bicor=-0.27, p=0.14  
cor=-0.3, p=0.1

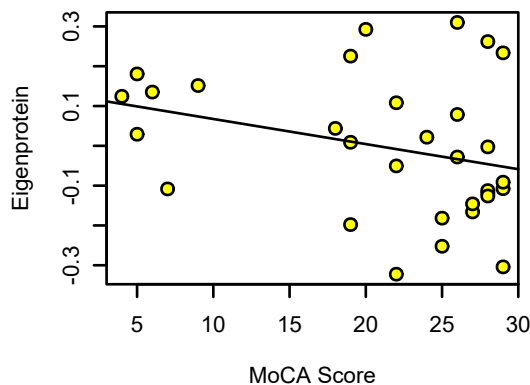

bicor=-0.44, p=0.067  
cor=-0.44, p=0.068

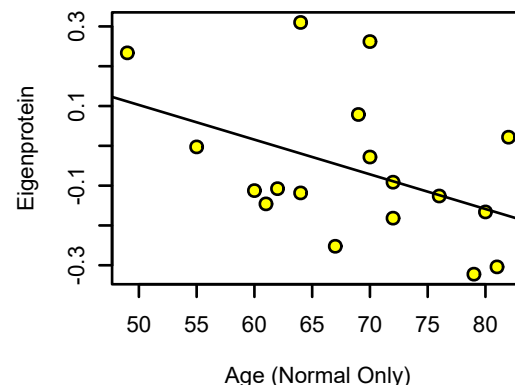

bicor=-0.46, p=0.066  
cor=-0.45, p=0.07

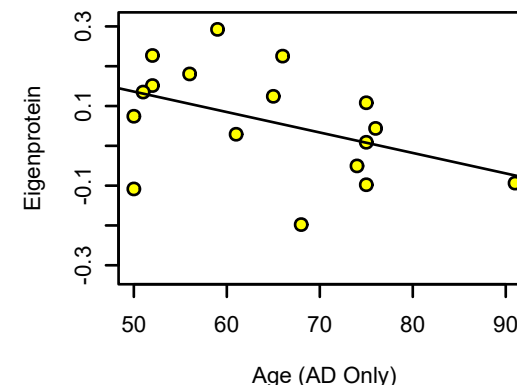

**M36 yellowgreen.MEGATMT488**  
Neurotransmitter Regulation

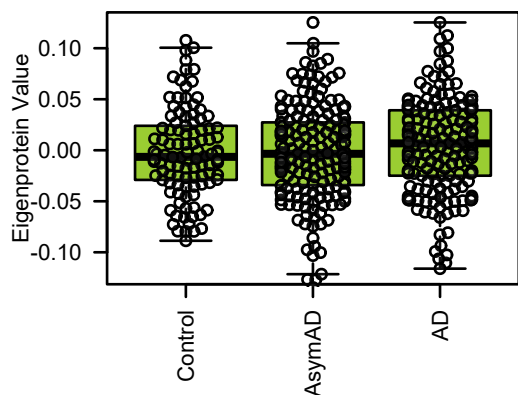

**MEyellowgreen.CSF 35 Samp. (Synthetic)**  
ANOVA p: 0.039

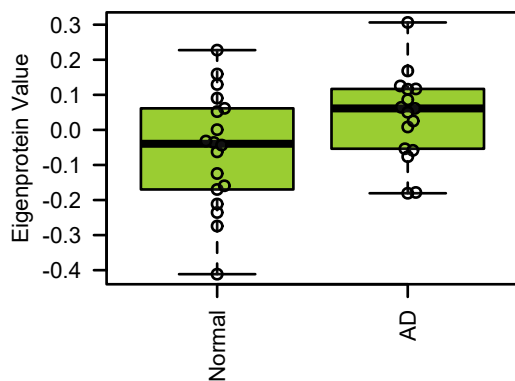

**MEyellowgreen.CSF (Synthetic)**  
ANOVA p: 0.17

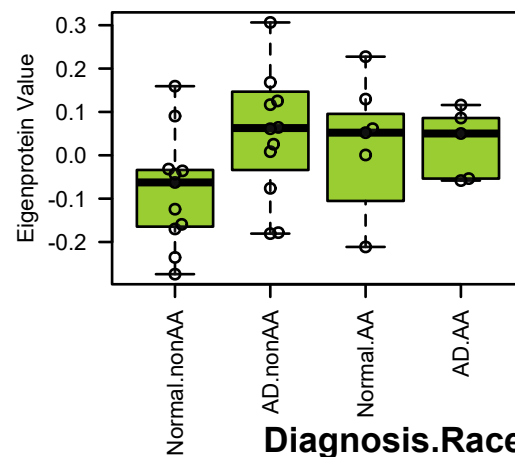

**MEyellowgreen.CSF (Synthetic)**  
ANOVA p: 0.18

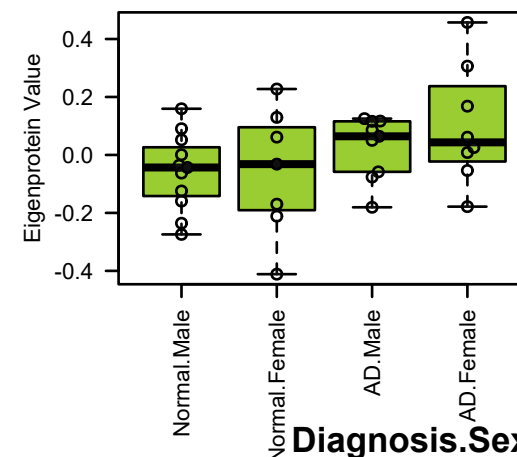

bicor=-0.26, p=0.13  
cor=-0.27, p=0.12

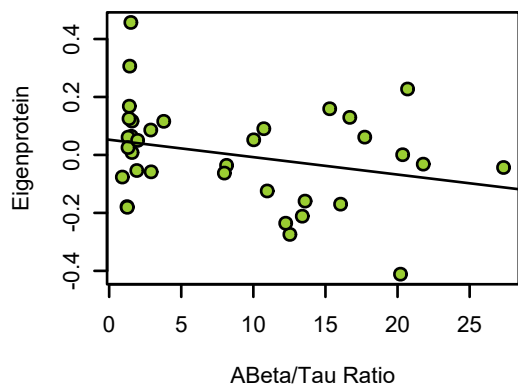

bicor=-0.25, p=0.18  
cor=-0.27, p=0.14

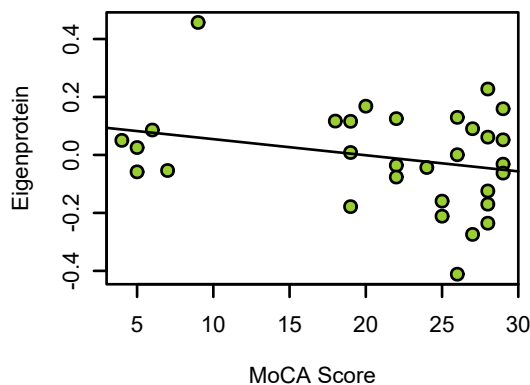

bicor=-0.38, p=0.12  
cor=-0.39, p=0.11

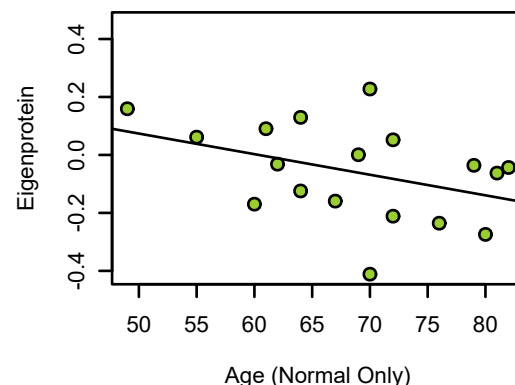

bicor=-0.18, p=0.49  
cor=-0.29, p=0.26

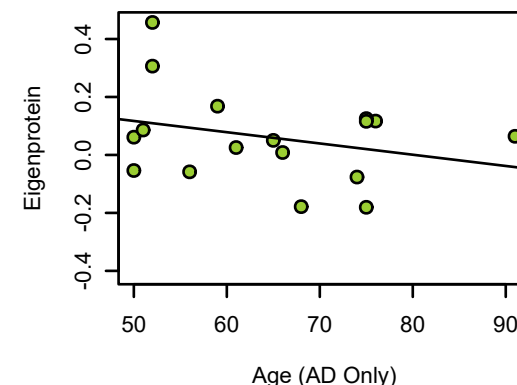

**M2 blue.MEGATMT488  
Mitochondria**

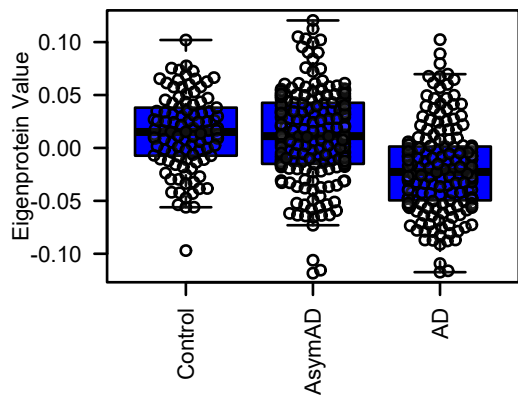

**MEblue.CSF 35 Samp. (Synthetic)  
ANOVA p: 0.8**

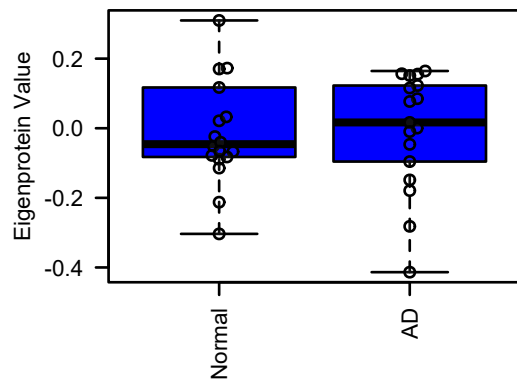

**MEblue.CSF (Synthetic)  
ANOVA p: 0.098**

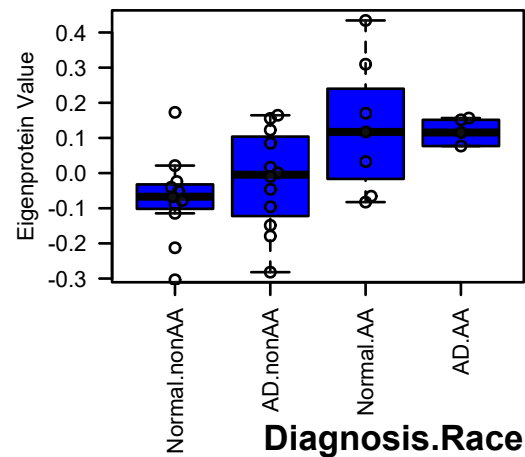

**MEblue.CSF (Synthetic)  
ANOVA p: 0.13**

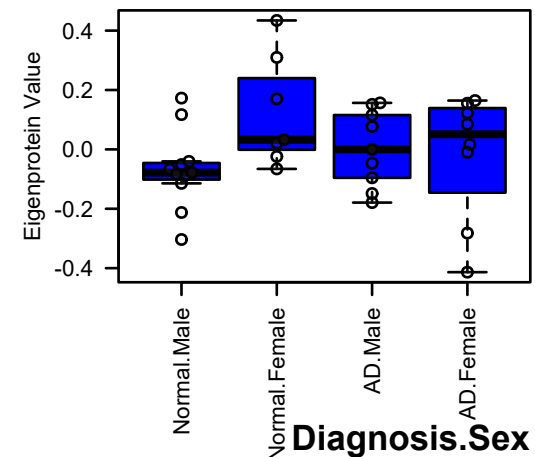

**bicor=0.2, p=0.25  
cor=0.23, p=0.18**

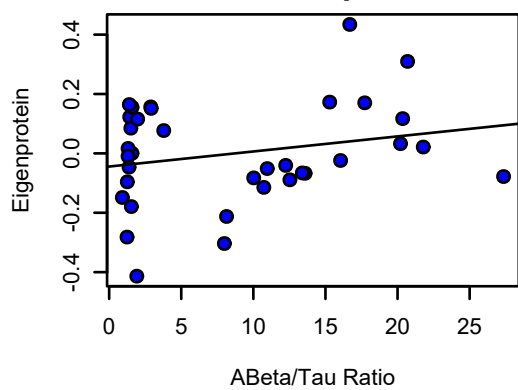

**bicor=-0.0034, p=0.99  
cor=-0.0084, p=0.96**

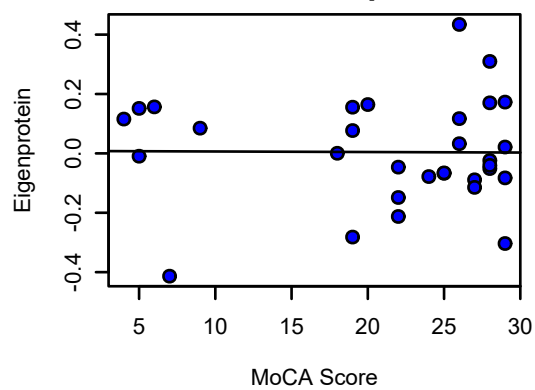

**bicor=-0.65, p=0.0037  
cor=-0.53, p=0.024**

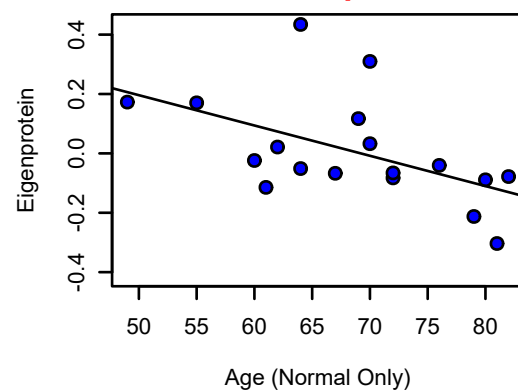

**bicor=-0.35, p=0.16  
cor=-0.27, p=0.29**

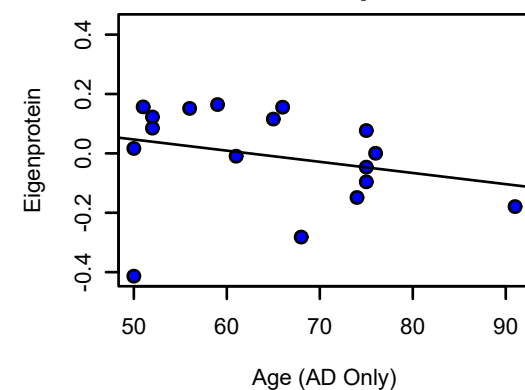

**M31 paleturquoise.MEGATMT488  
Axon Node/Ion Channel**

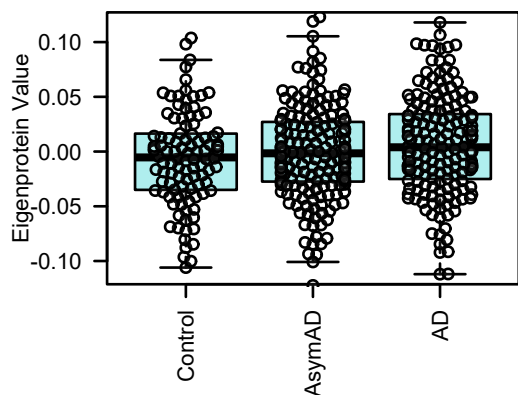

**MEpaleturquoise.CSF 35 Samp. (Synthetic)  
ANOVA p: 0.97**

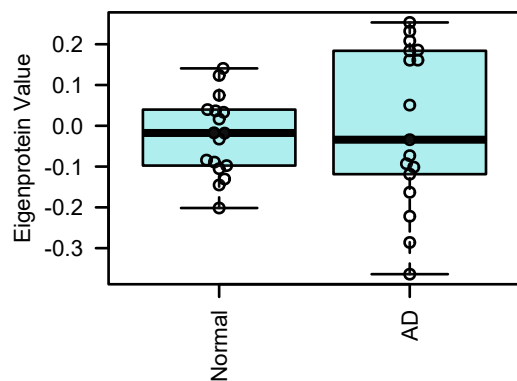

**MEpaleturquoise.CSF (Synthetic)  
ANOVA p: 0.06**

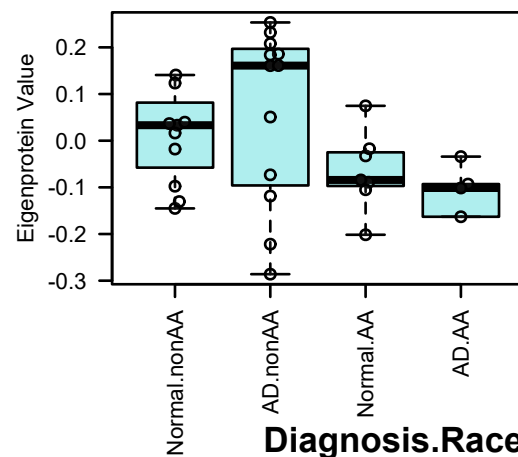

**MEpaleturquoise.CSF (Synthetic)  
ANOVA p: 0.19**

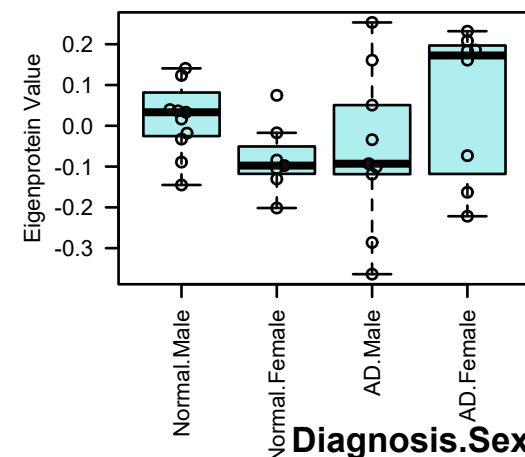

**bicor=-0.12, p=0.49  
cor=-0.096, p=0.58**

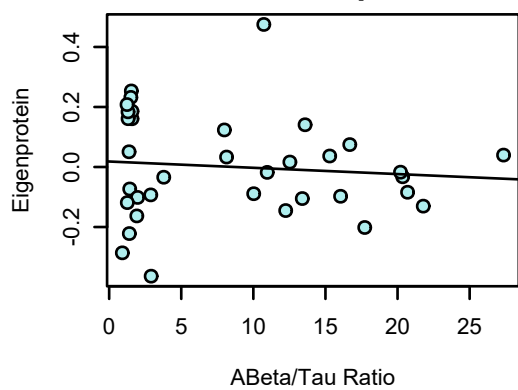

**bicor=-0.15, p=0.41  
cor=0.079, p=0.67**

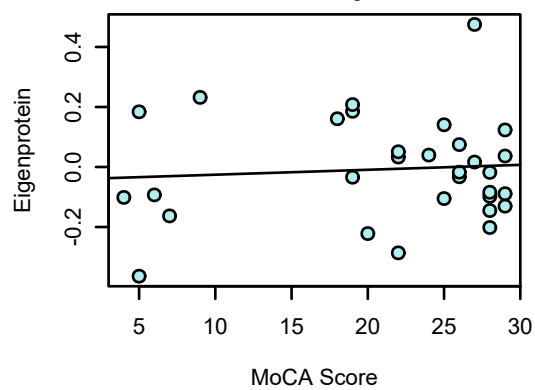

**bicor=0.2, p=0.43  
cor=0.014, p=0.96**

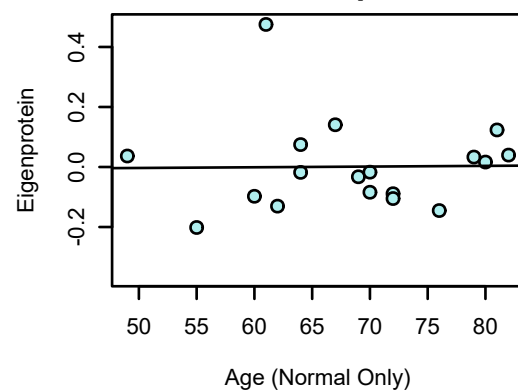

**bicor=0.2, p=0.43  
cor=0.23, p=0.37**

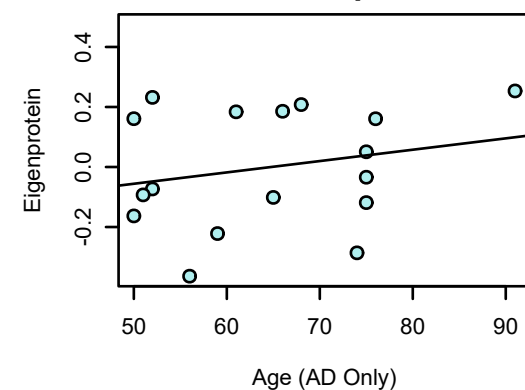

**M33 darkolivegreen.MEGATMT488**  
**Ambiguous**

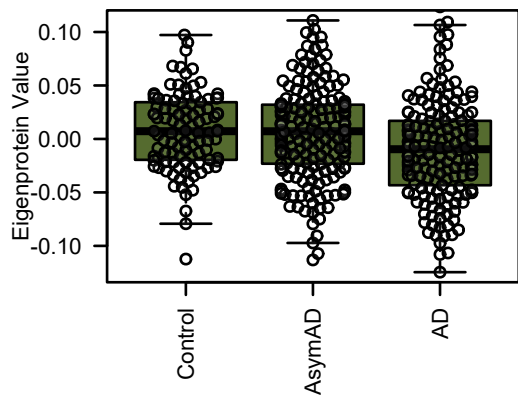

**MEdarkolivegreen.CSF 35 Samp. (Synthetic)**  
**ANOVA p: 0.018**

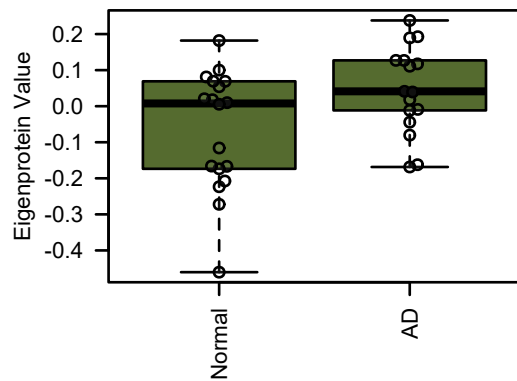

**MEdarkolivegreen.CSF (Synthetic)**  
**ANOVA p: 0.046**

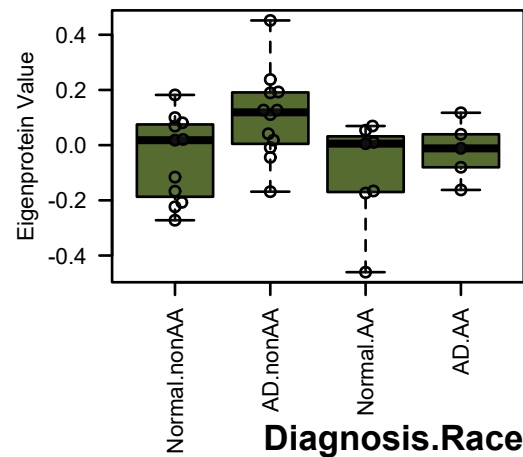

**MEdarkolivegreen.CSF (Synthetic)**  
**ANOVA p: 0.05**

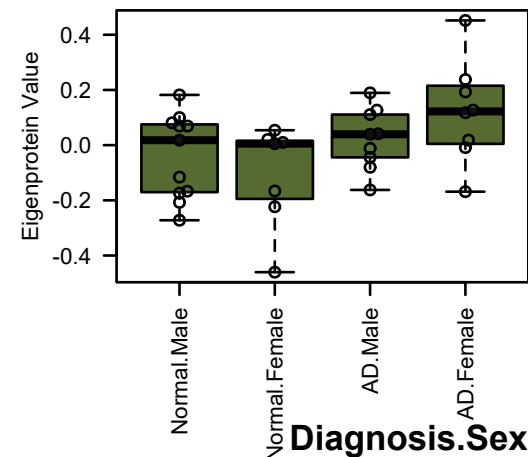

**bicor=-0.48, p=0.0035**  
**cor=-0.49, p=0.0028**

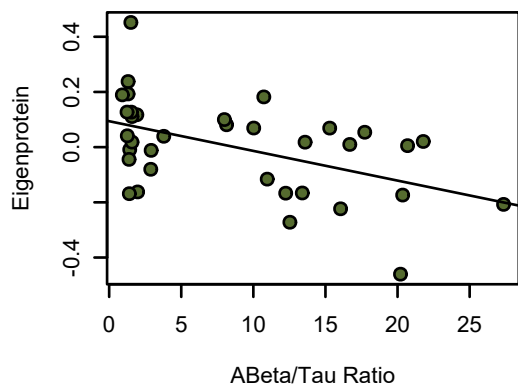

**bicor=-0.24, p=0.18**  
**cor=-0.28, p=0.13**

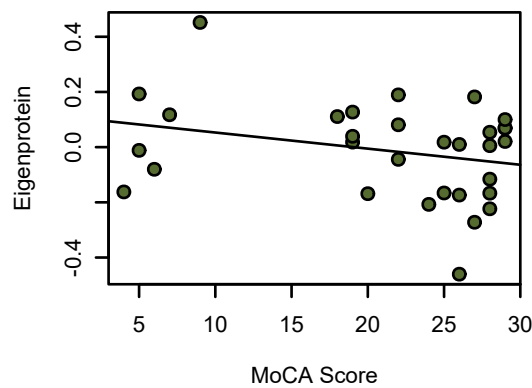

**bicor=-0.24, p=0.35**  
**cor=-0.29, p=0.24**

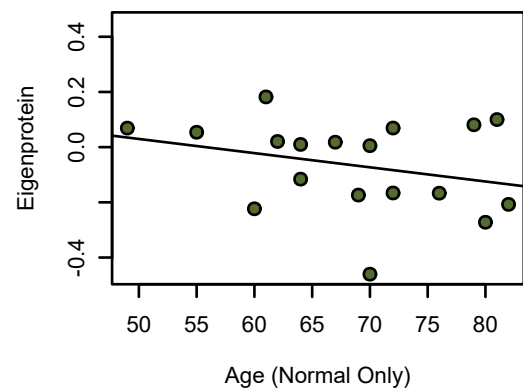

**bicor=0.0082, p=0.97**  
**cor=-0.068, p=0.8**

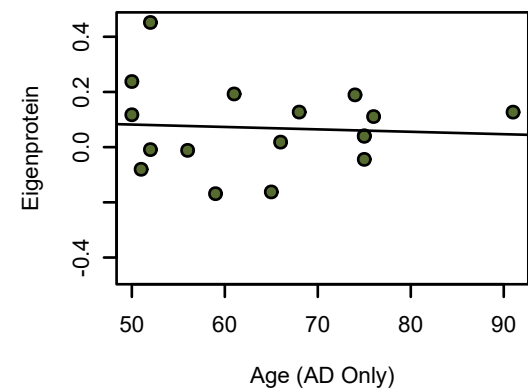

**M3 brown.MEGATMT488**  
**Oligo/Myelination**

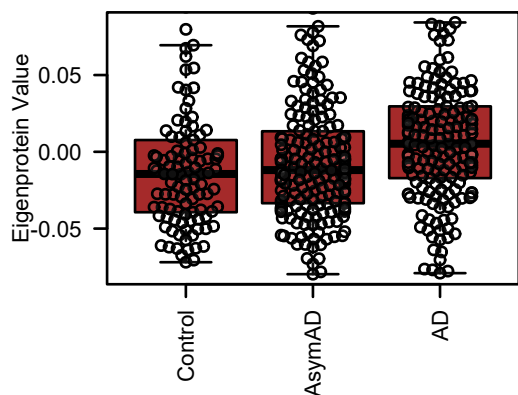

**MEbrown.CSF 35 Samp. (Synthetic)**  
**ANOVA p: 0.43**

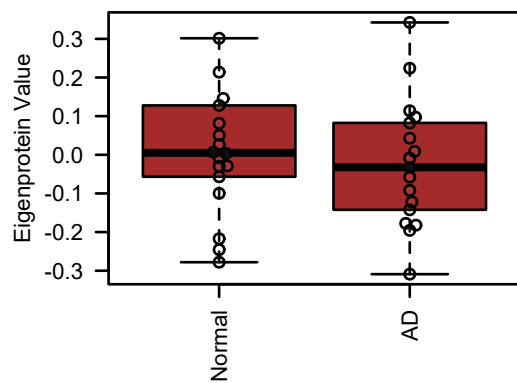

**MEbrown.CSF (Synthetic)**  
**ANOVA p: 0.046**

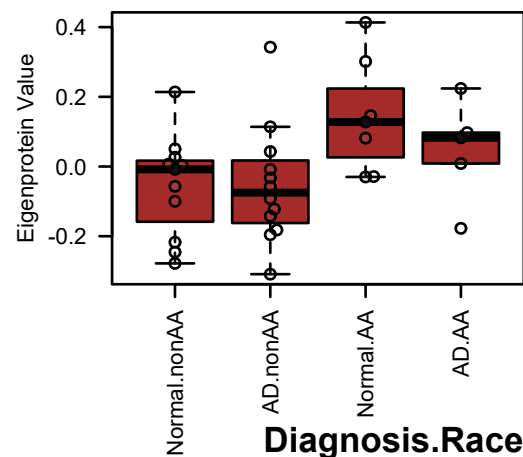

**MEbrown.CSF (Synthetic)**  
**ANOVA p: 0.16**

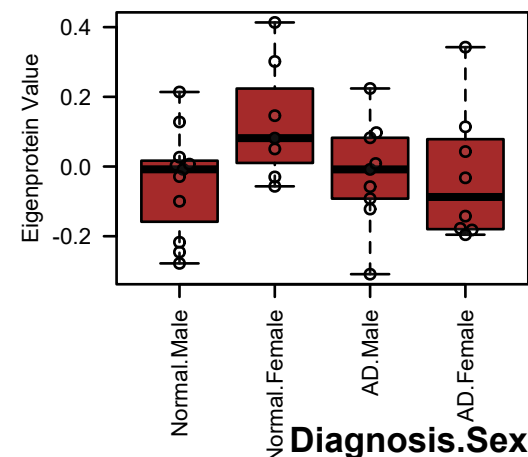

**bicor=0.31, p=0.067**  
**cor=0.3, p=0.08**

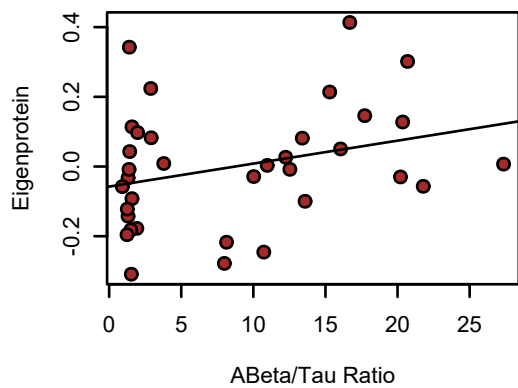

**bicor=0.14, p=0.45**  
**cor=0.088, p=0.64**

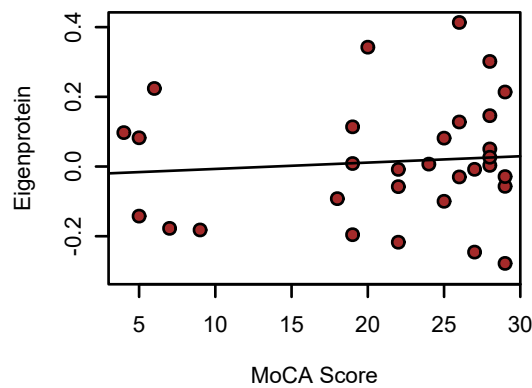

**bicor=-0.41, p=0.095**  
**cor=-0.39, p=0.11**

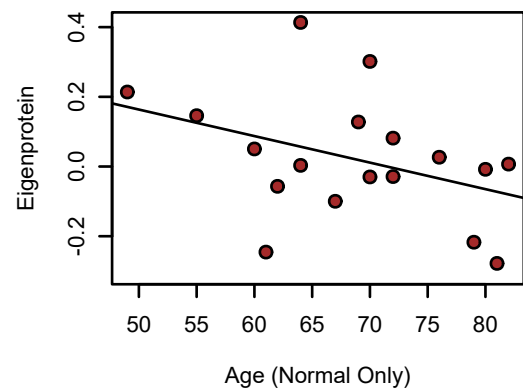

**bicor=-0.35, p=0.17**  
**cor=-0.38, p=0.13**

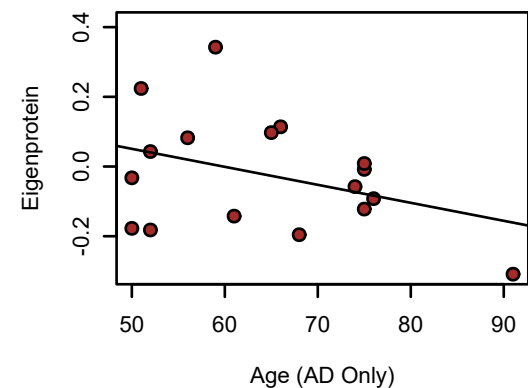

**M34 darkmagenta.MEGATMT488**  
Ambiguous

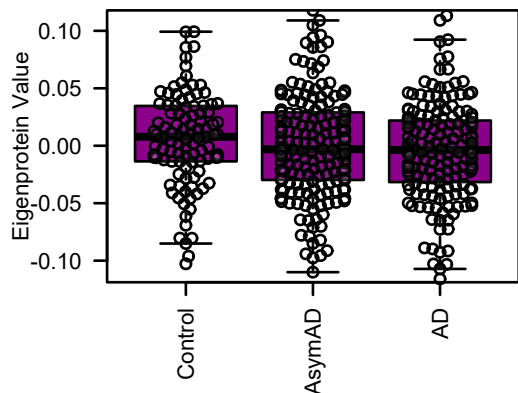

**MEdarkmagenta.CSF 35 Samp. (Synthetic)**  
ANOVA p: 0.31

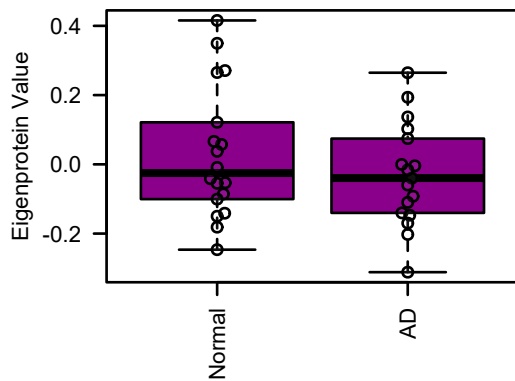

**MEdarkmagenta.CSF (Synthetic)**  
ANOVA p: 0.019

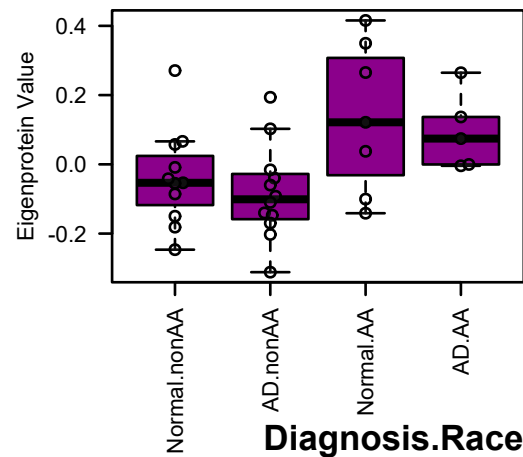

**MEdarkmagenta.CSF (Synthetic)**  
ANOVA p: 0.17

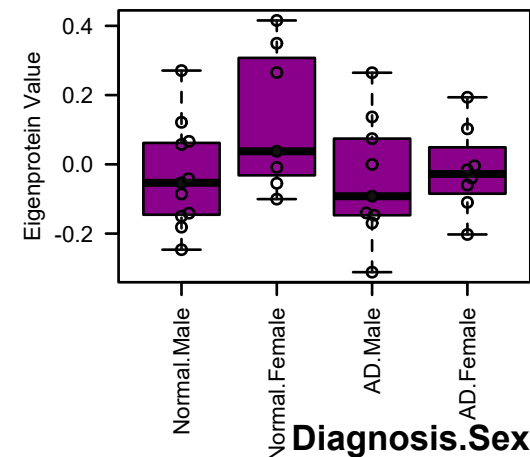

**bicor=0.34, p=0.049**  
**cor=0.35, p=0.039**

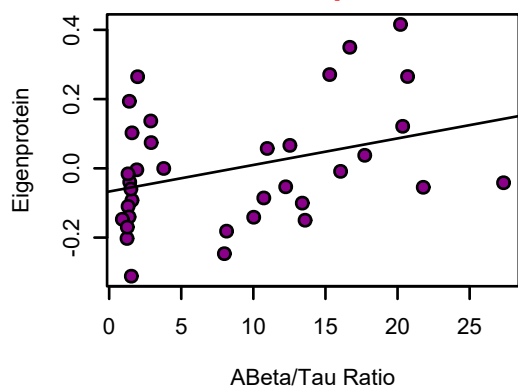

**bicor=0.049, p=0.79**  
**cor=-0.075, p=0.69**

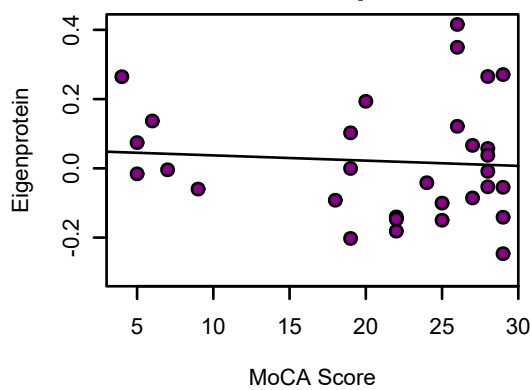

**bicor=-0.42, p=0.086**  
**cor=-0.38, p=0.12**

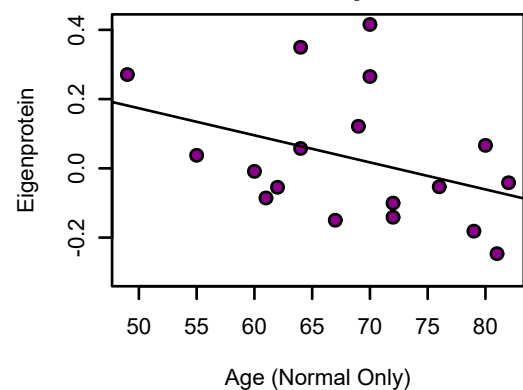

**bicor=-0.52, p=0.032**  
**cor=-0.52, p=0.032**

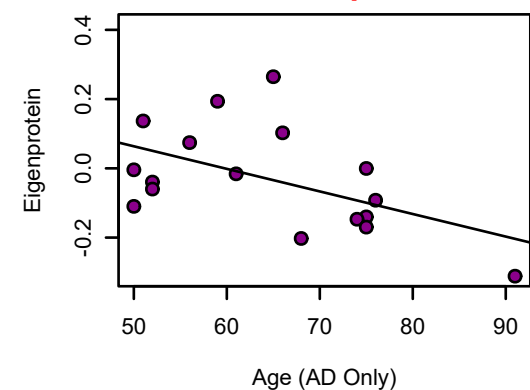

**M8 pink.MEGATMT488**  
Protein Transport

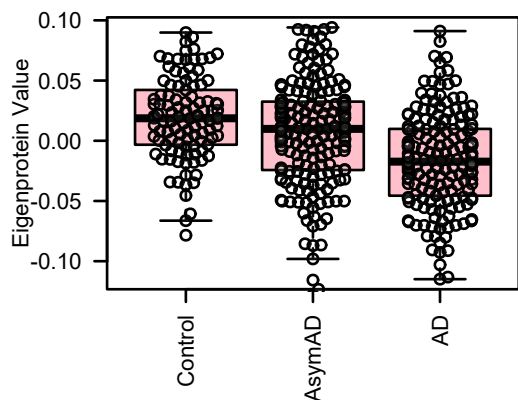

**MEpink.CSF 35 Samp. (Synthetic)**  
ANOVA p: 0.49

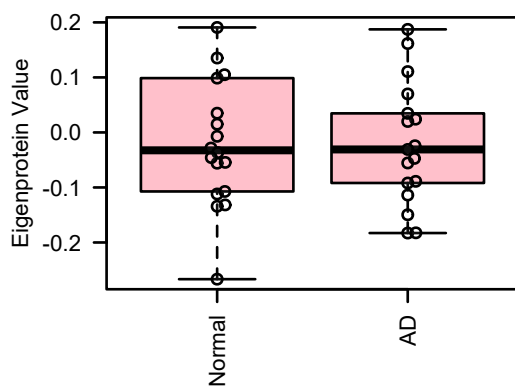

**MEpink.CSF (Synthetic)**  
ANOVA p: 0.089

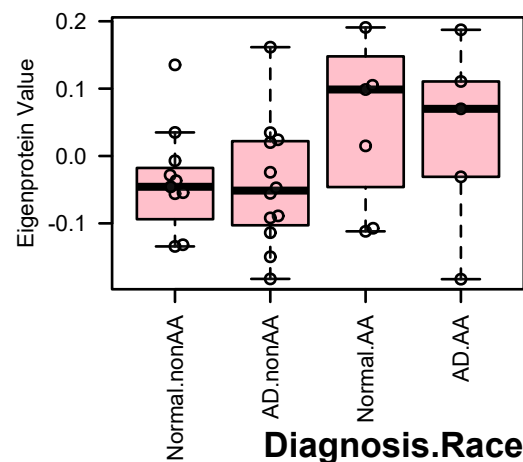

**MEpink.CSF (Synthetic)**  
ANOVA p: 0.31

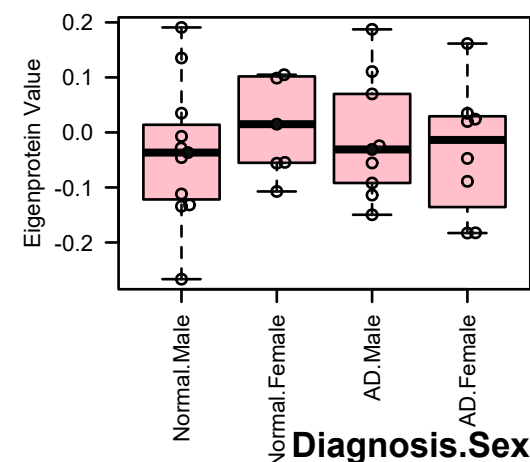

**bicor=0.24, p=0.17**  
**cor=0.36, p=0.034**

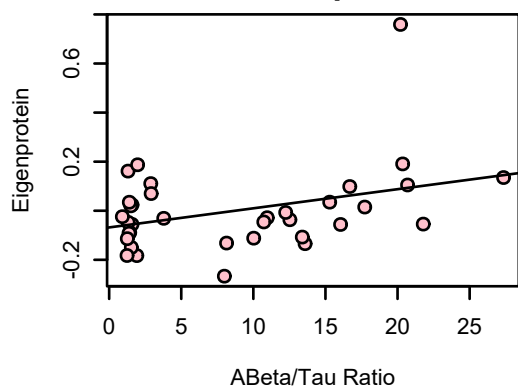

**bicor=-0.11, p=0.57**  
**cor=-0.11, p=0.56**

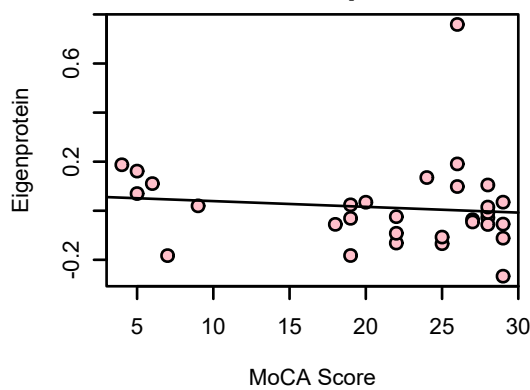

**bicor=-0.22, p=0.37**  
**cor=-0.076, p=0.76**

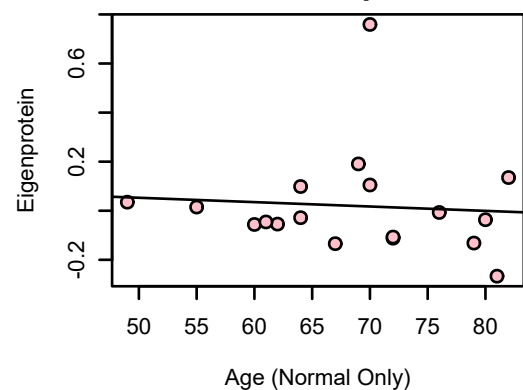

**bicor=-0.33, p=0.2**  
**cor=-0.3, p=0.24**

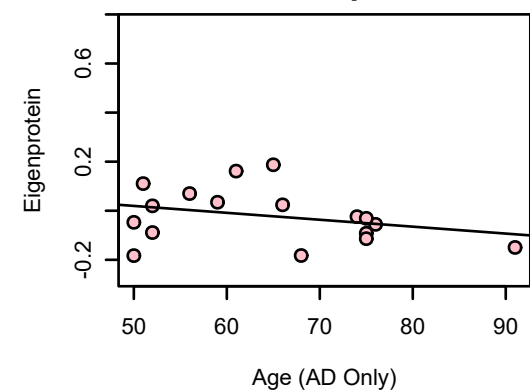

**M37 skyblue3.MEGATMT488  
Endosome**

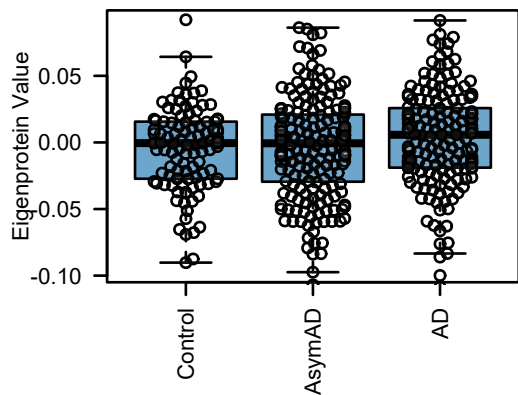

**MEskyblue3.CSF 35 Samp. (Synthetic)  
ANOVA p: 0.17**

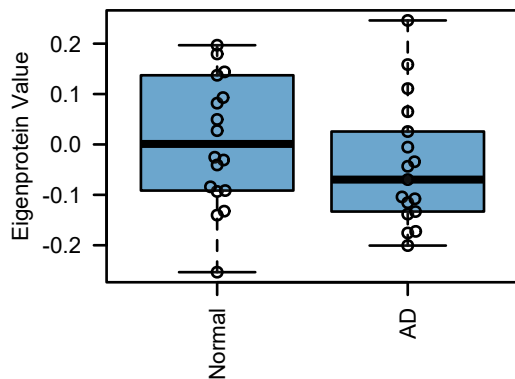

**MEskyblue3.CSF (Synthetic)  
ANOVA p: 0.031**

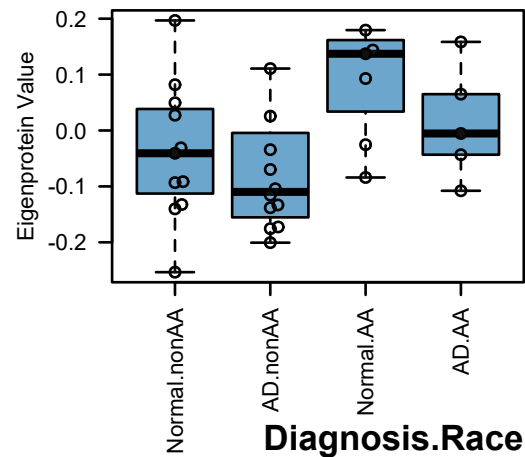

**MEskyblue3.CSF (Synthetic)  
ANOVA p: 0.17**

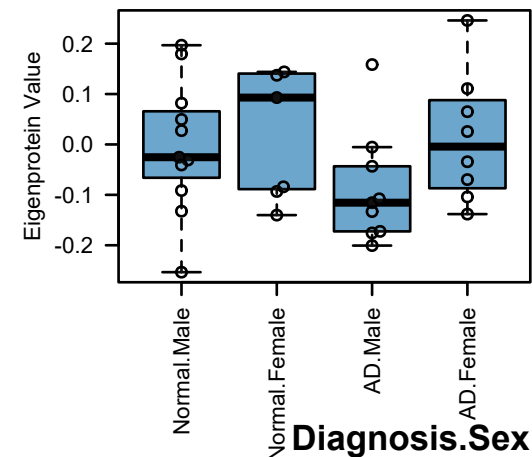

**bicor=0.36, p=0.032  
cor=0.42, p=0.012**

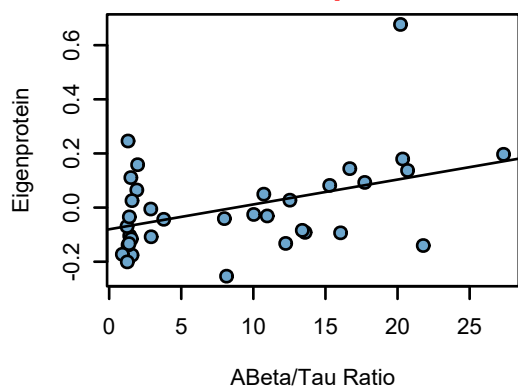

**bicor=0.028, p=0.88  
cor=-0.066, p=0.72**

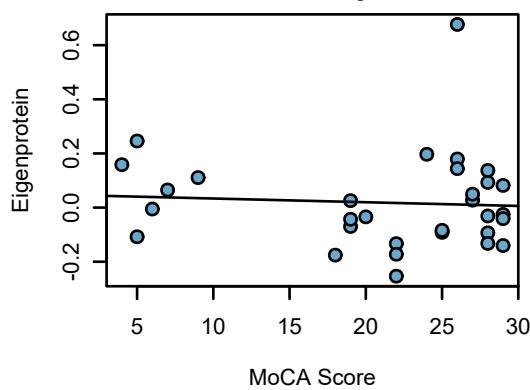

**bicor=-0.16, p=0.54  
cor=-0.068, p=0.79**

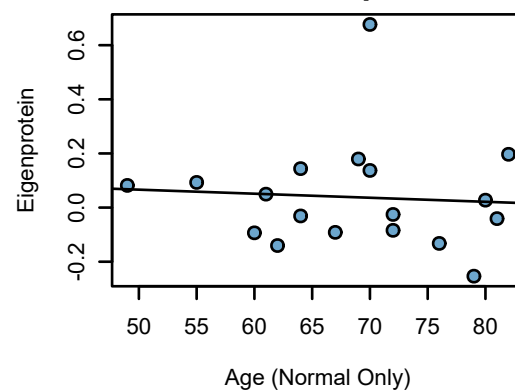

**bicor=-0.45, p=0.069  
cor=-0.39, p=0.12**

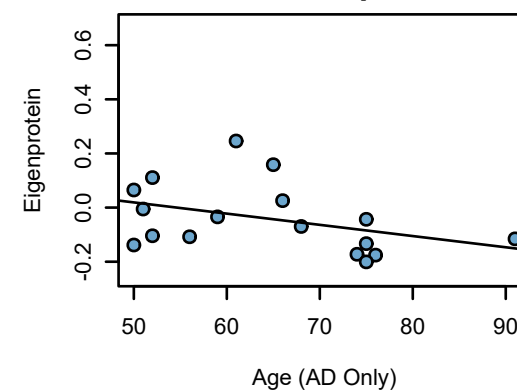

**M30 steelblue.MEGATMT488  
Proteasome**

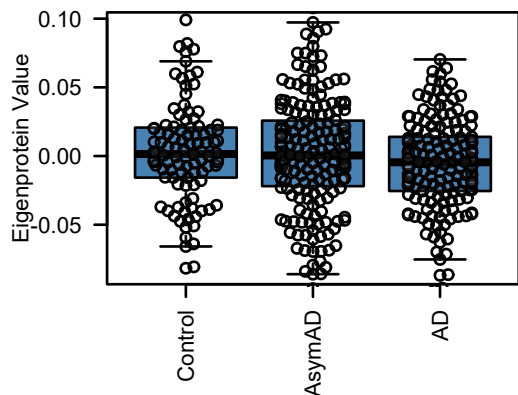

**MEsteelblue.CSF 35 Samp. (Synthetic)  
ANOVA p: 0.48**

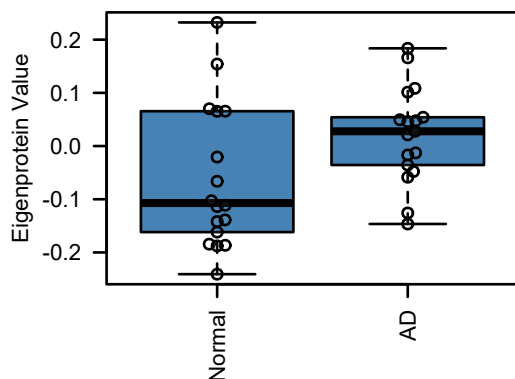

**MEsteelblue.CSF (Synthetic)  
ANOVA p: 0.076**

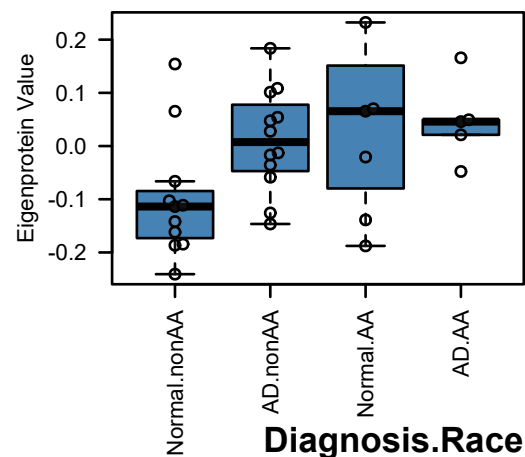

**MEsteelblue.CSF (Synthetic)  
ANOVA p: 0.37**

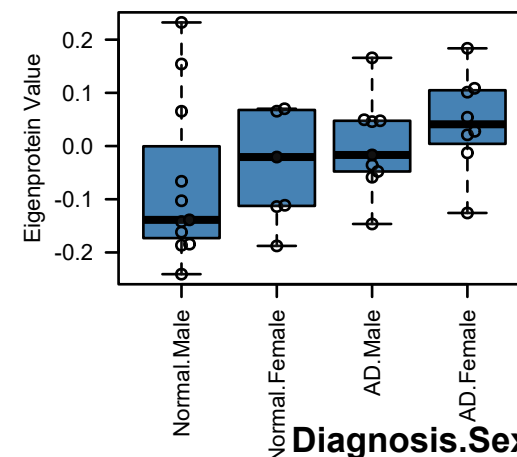

**bicor=-0.045, p=0.8  
cor=0.17, p=0.33**

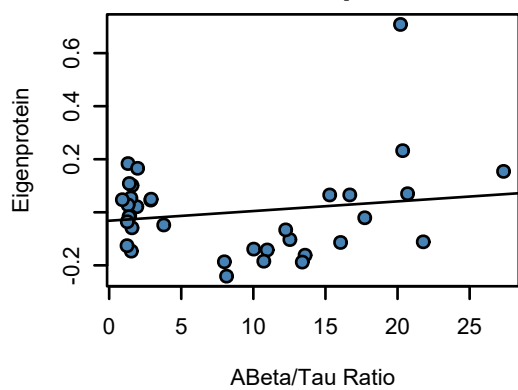

**bicor=-0.32, p=0.077  
cor=-0.24, p=0.19**

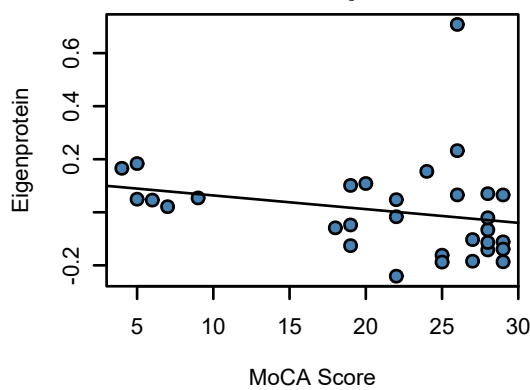

**bicor=-0.2, p=0.42  
cor=-0.047, p=0.85**

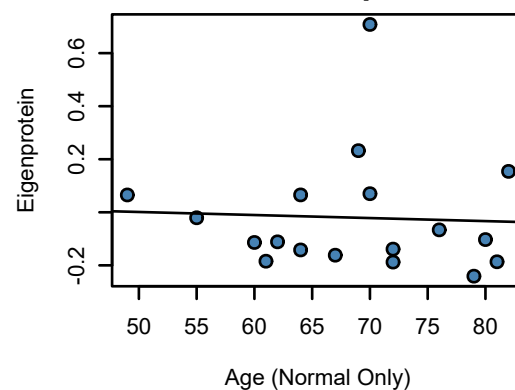

**bicor=-0.49, p=0.044  
cor=-0.51, p=0.036**

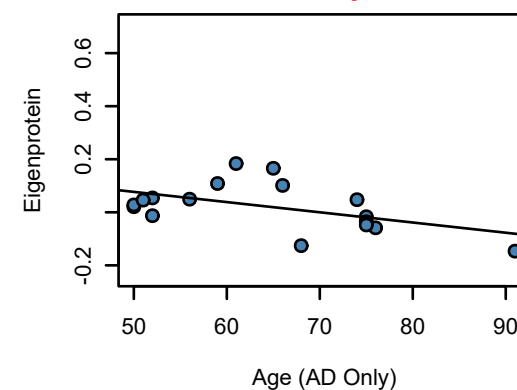

**M38 plum1.MEGATMT488**  
**Heat Shock/Folding**

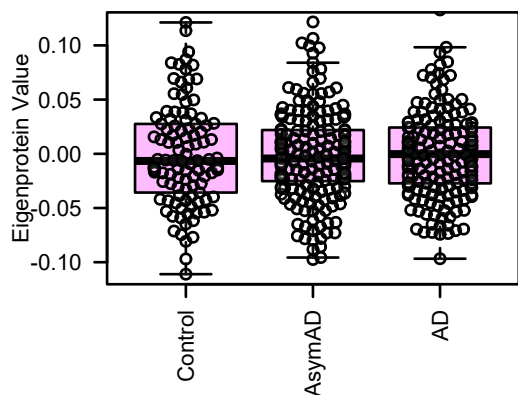

**MEplum1.CSF 35 Samp. (Synthetic)**  
**ANOVA p: 0.51**

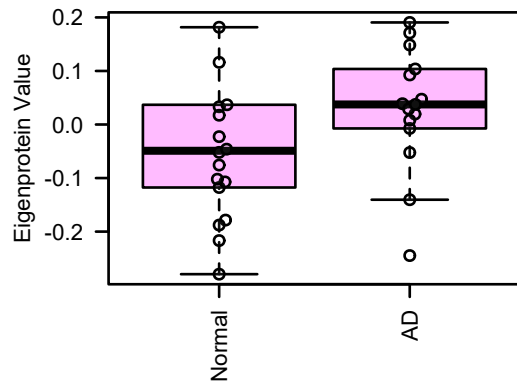

**MEplum1.CSF (Synthetic)**  
**ANOVA p: 0.11**

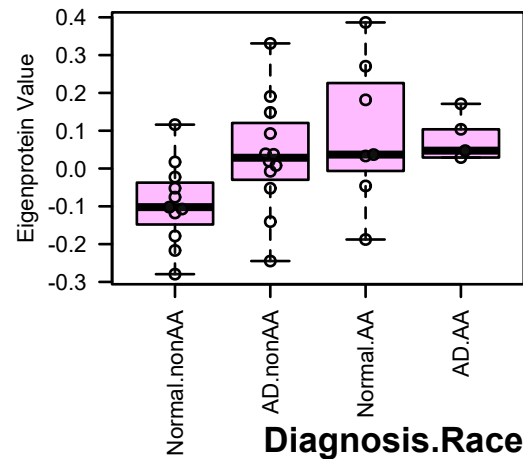

**MEplum1.CSF (Synthetic)**  
**ANOVA p: 0.34**

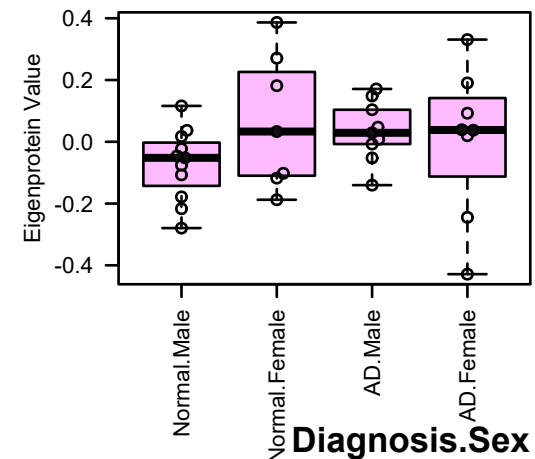

**bicor=-0.019, p=0.91**  
**cor=0.045, p=0.8**

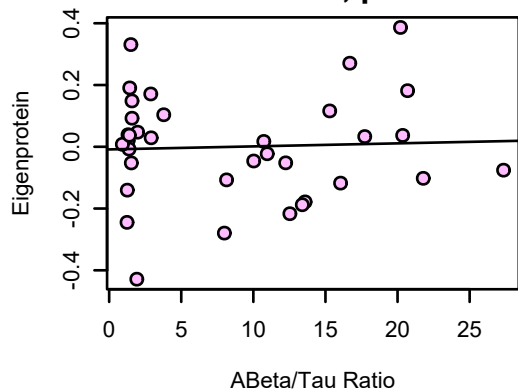

**bicor=-0.16, p=0.4**  
**cor=-0.11, p=0.56**

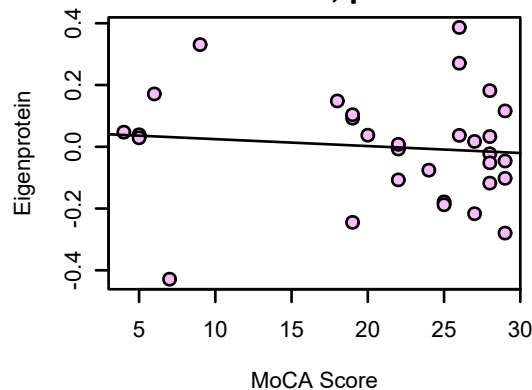

**bicor=-0.49, p=0.041**  
**cor=-0.39, p=0.11**

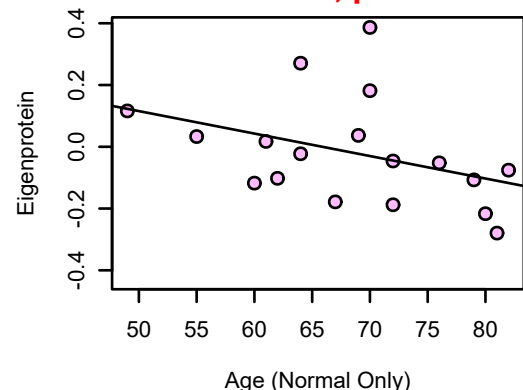

**bicor=-0.4, p=0.11**  
**cor=-0.13, p=0.62**

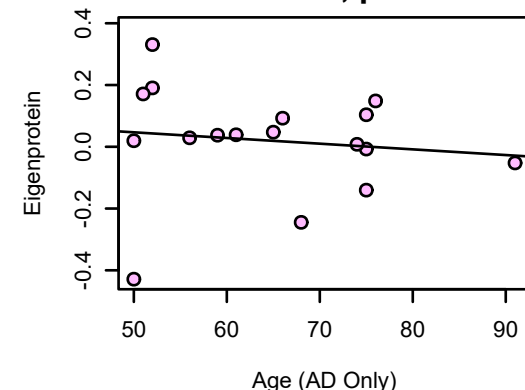

**M39 orangered4.MEGATMT488**  
**Translation Initiation**

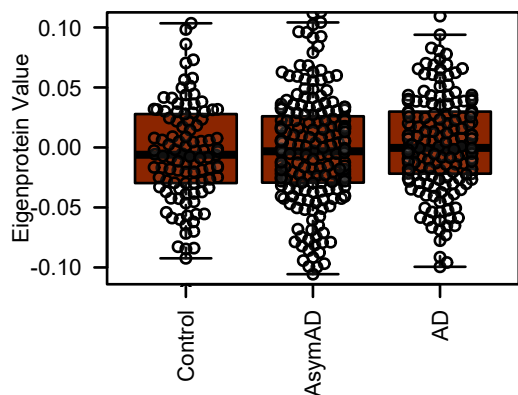

**MEorangered4.CSF 35 Samp. (Synthetic)**  
**ANOVA p: 0.85**

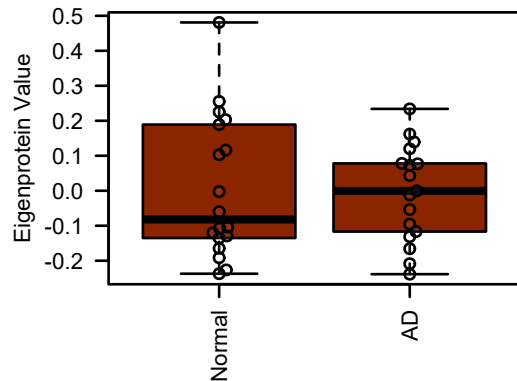

**MEorangered4.CSF (Synthetic)**  
**ANOVA p: 0.016**

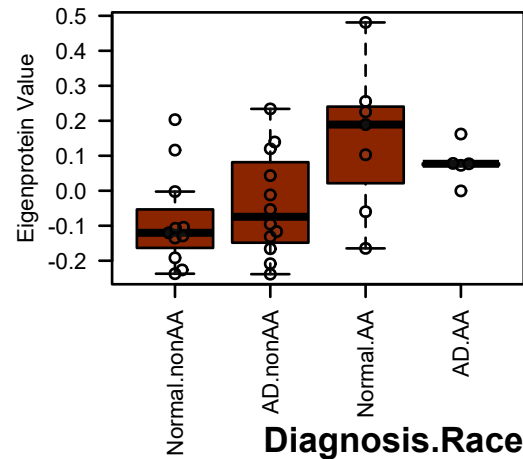

**MEorangered4.CSF (Synthetic)**  
**ANOVA p: 0.24**

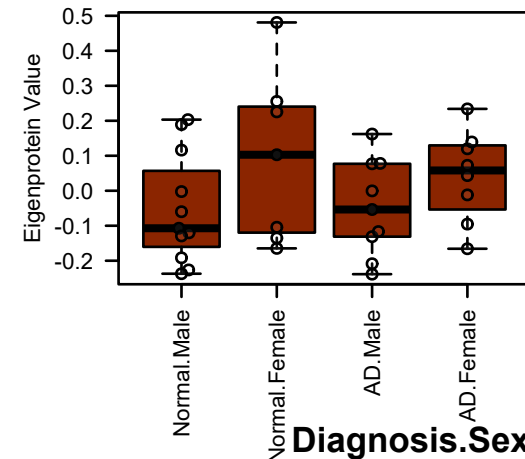

**bicor=0.25, p=0.15**  
**cor=0.28, p=0.1**

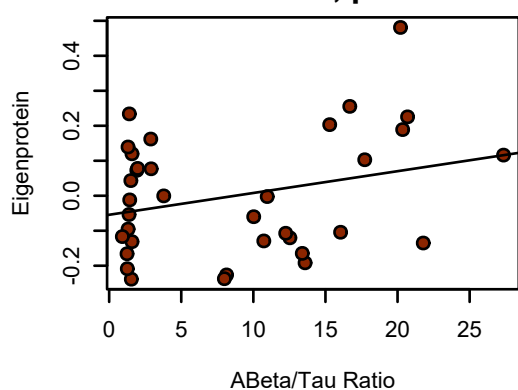

**bicor=-0.11, p=0.56**  
**cor=-0.19, p=0.31**

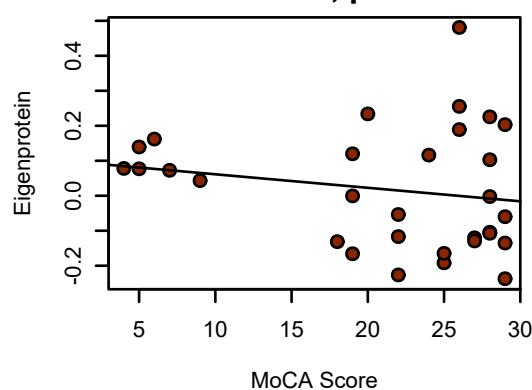

**bicor=-0.34, p=0.17**  
**cor=-0.29, p=0.24**

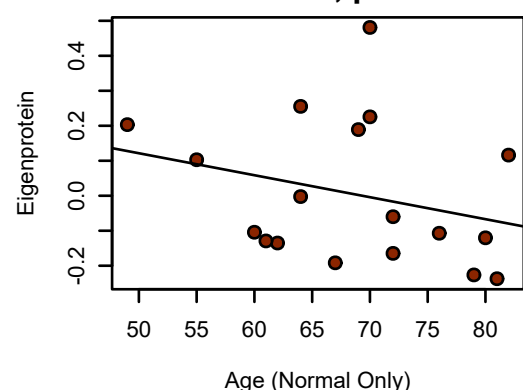

**bicor=-0.63, p=0.0073**  
**cor=-0.63, p=0.0067**

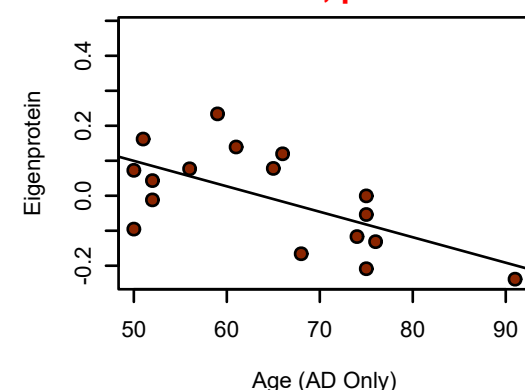



**M14 cyan.MEGATMT488  
Protein Folding**

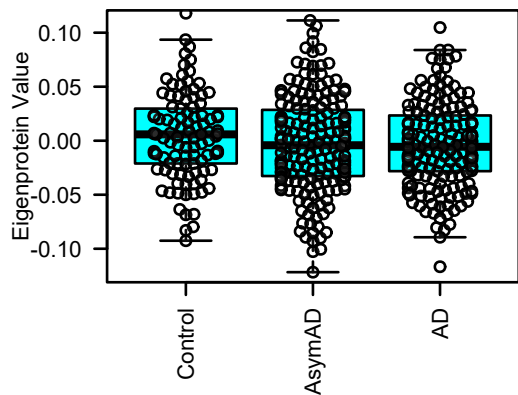

**MEcyan.CSF 35 Samp. (Synthetic)  
ANOVA p: 0.58**

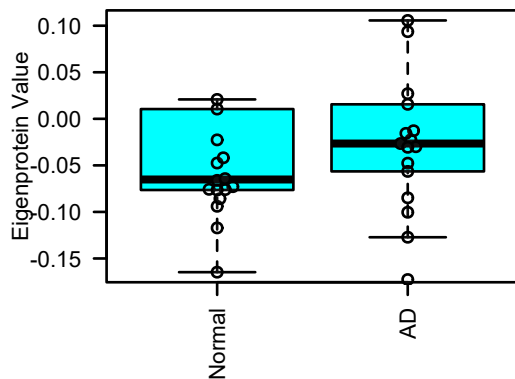

**MEcyan.CSF (Synthetic)  
ANOVA p: 0.2**

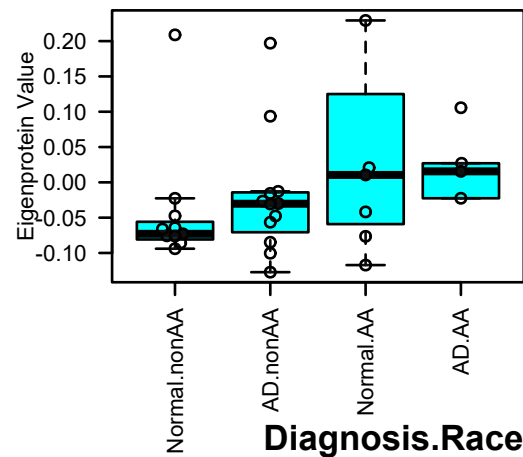

**MEcyan.CSF (Synthetic)  
ANOVA p: 0.59**

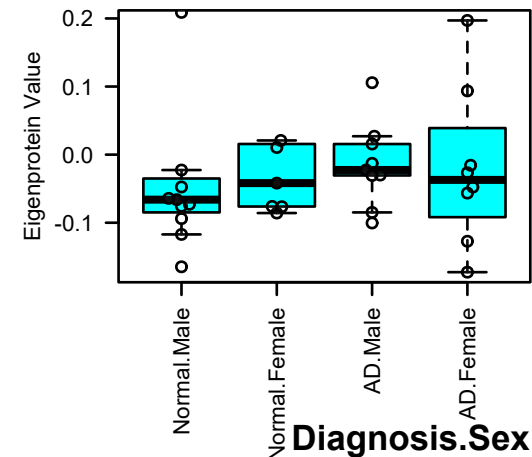

**bicor=0.023, p=0.9  
cor=0.32, p=0.061**

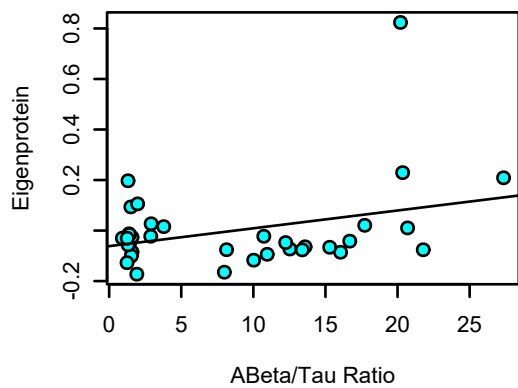

**bicor=-0.25, p=0.17  
cor=-0.08, p=0.67**

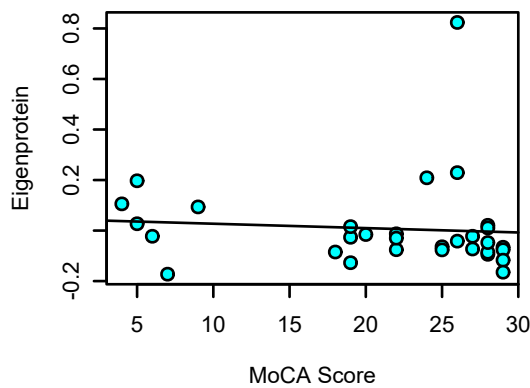

**bicor=-0.37, p=0.13  
cor=0.073, p=0.77**

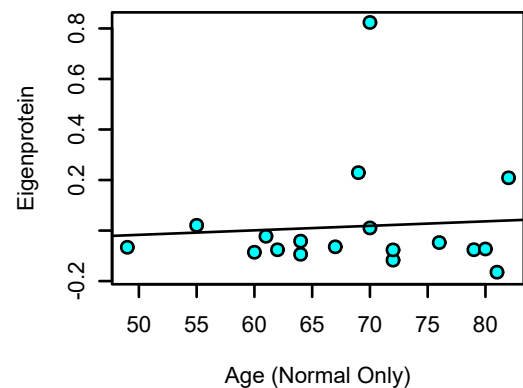

**bicor=-0.17, p=0.52  
cor=-0.14, p=0.59**

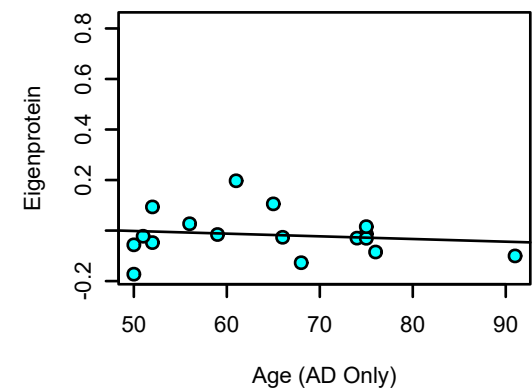

**M25 orange.MEGATMT488  
Sugar Metabolism**

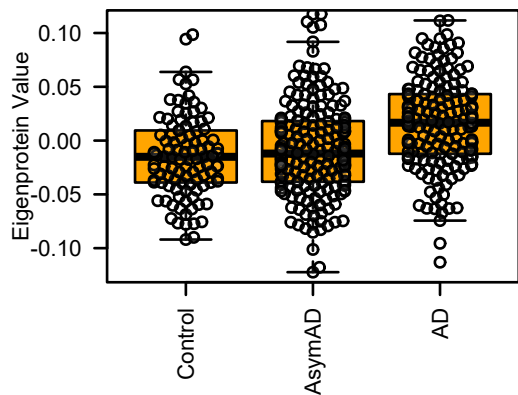

**MEorange.CSF 35 Samp. (Synthetic)  
ANOVA p: 0.88**

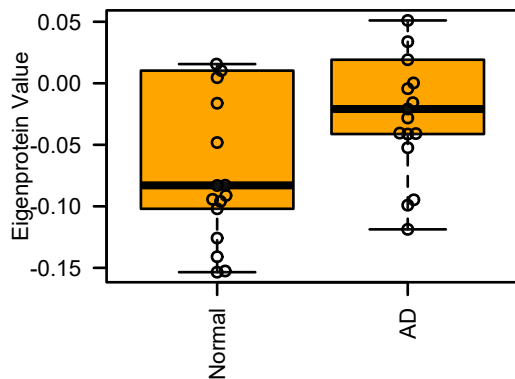

**MEorange.CSF (Synthetic)  
ANOVA p: 0.16**

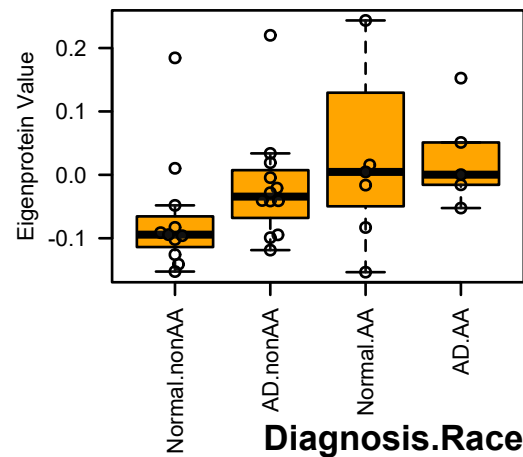

**MEorange.CSF (Synthetic)  
ANOVA p: 0.68**

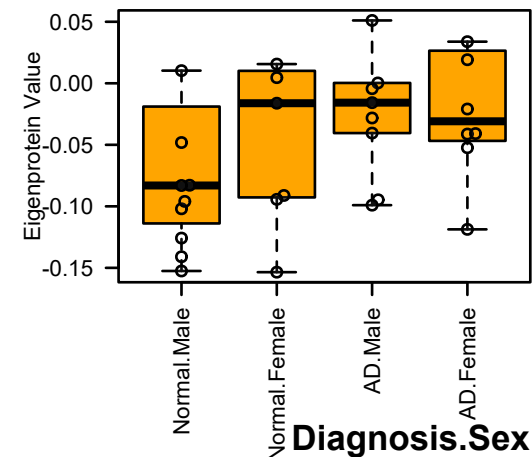

**bicor=-0.0055, p=0.97  
cor=0.27, p=0.12**

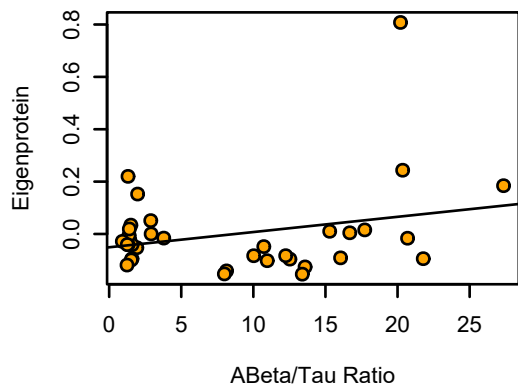

**bicor=-0.25, p=0.18  
cor=-0.15, p=0.42**

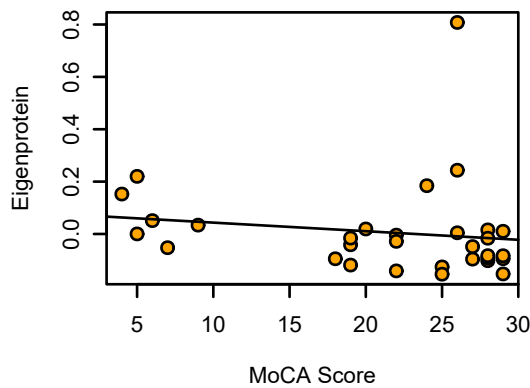

**bicor=-0.27, p=0.28  
cor=-0.0049, p=0.98**

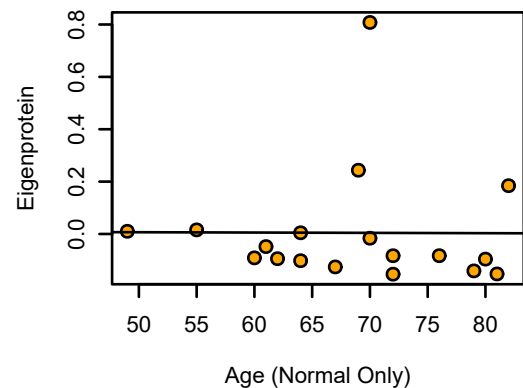

**bicor=-0.47, p=0.054  
cor=-0.33, p=0.2**

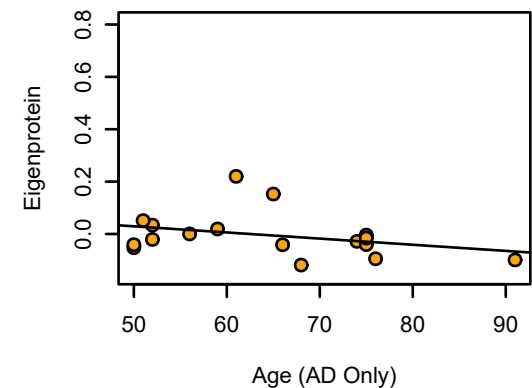

**M26 darkorange.MEGATMT488**  
Complement/Acute Phase

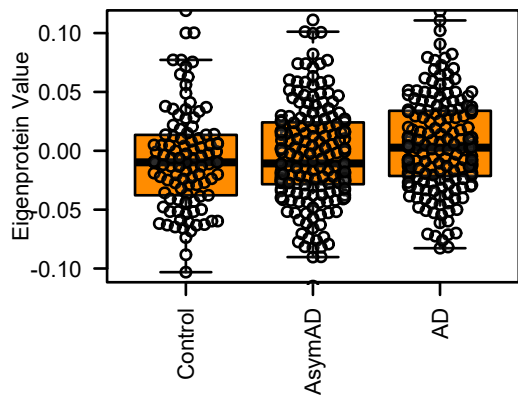

**MEdarkorange.CSF 35 Samp. (Synthetic)**  
ANOVA p: 0.034

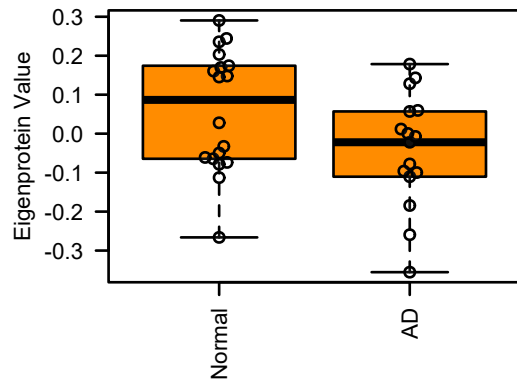

**MEdarkorange.CSF (Synthetic)**  
ANOVA p: 0.0018

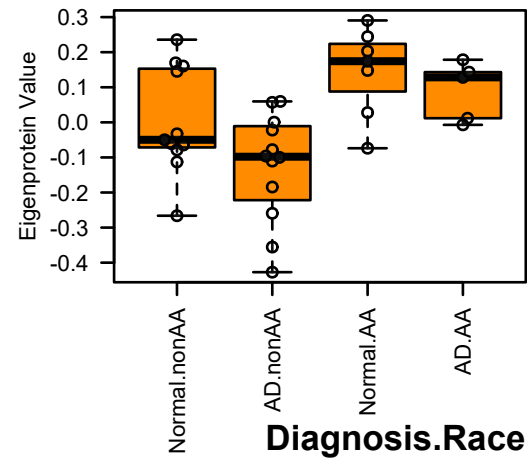

**MEdarkorange.CSF (Synthetic)**  
ANOVA p: 0.1

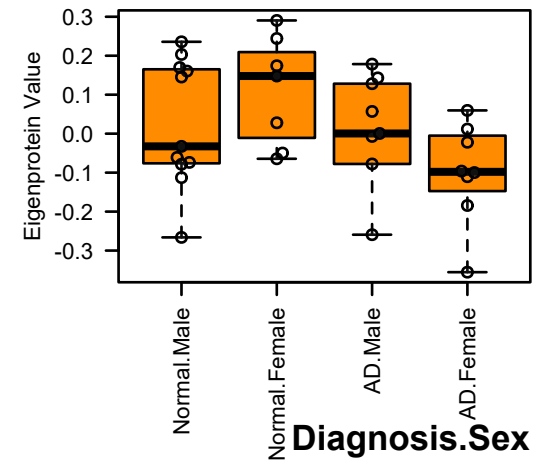

**bicor=0.45, p=0.0065**  
**cor=0.45, p=0.0067**

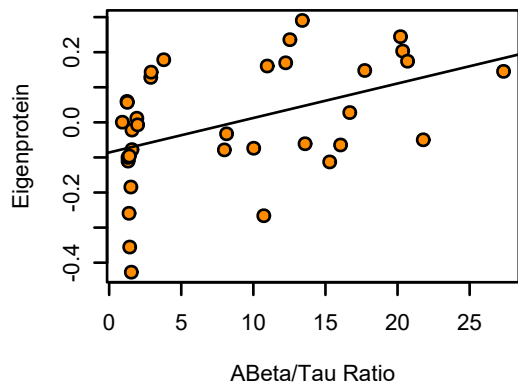

**bicor=0.1, p=0.58**  
**cor=0.11, p=0.56**

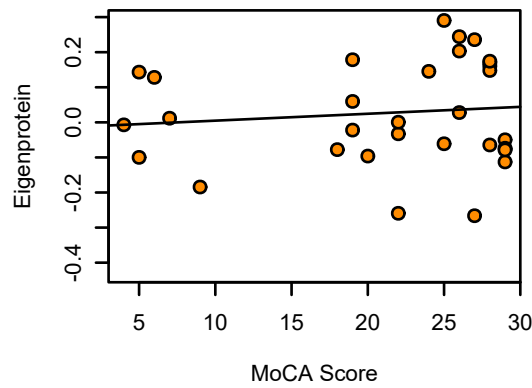

**bicor=0.35, p=0.15**  
**cor=0.34, p=0.17**

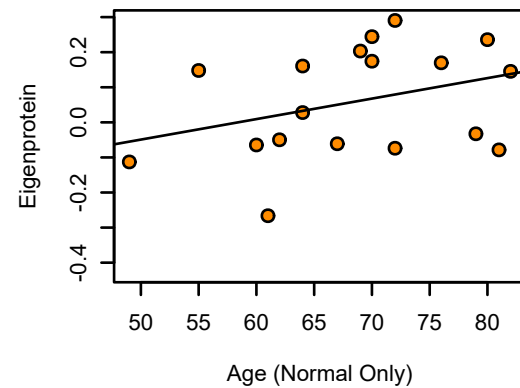

**bicor=-0.05, p=0.85**  
**cor=-0.19, p=0.47**

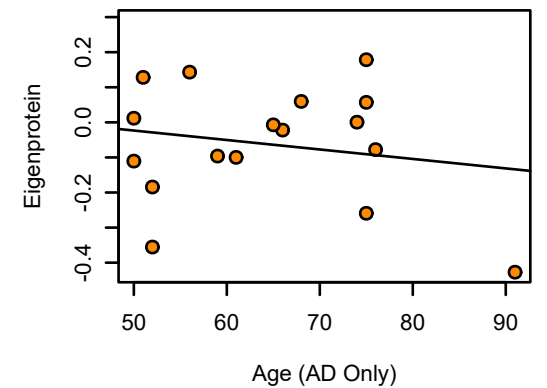

**M40 mediumpurple3.MEGATMT488**  
Ambiguous

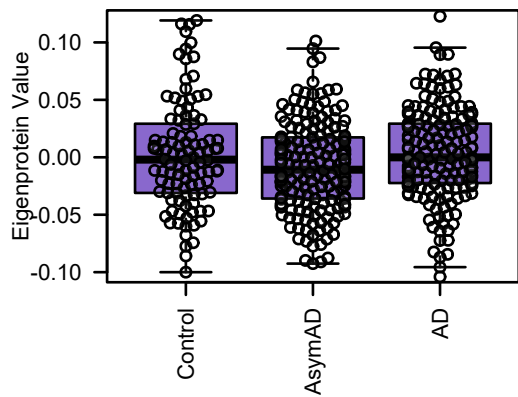

**MEmediumpurple3.CSF 35 Samp. (Synthetic)**  
ANOVA p: 0.74

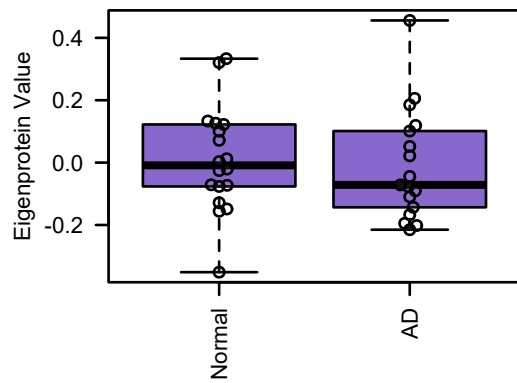

**MEmediumpurple3.CSF (Synthetic)**  
ANOVA p: 0.021

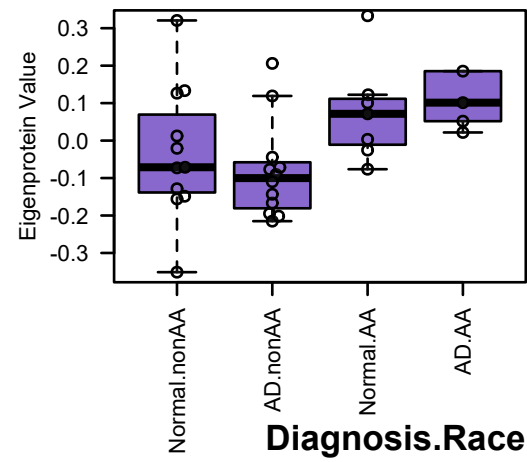

**MEmediumpurple3.CSF (Synthetic)**  
ANOVA p: 0.11

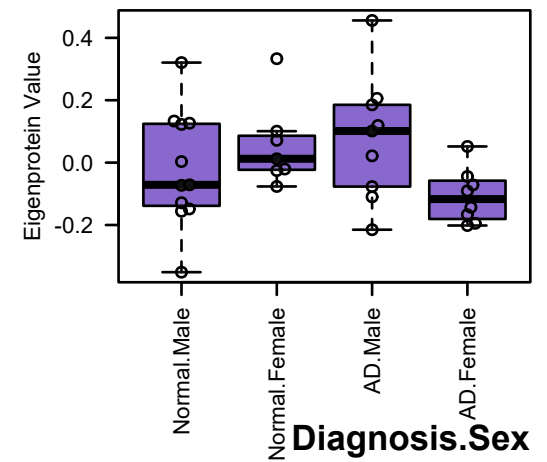

**bicor=0.25, p=0.15**  
**cor=0.22, p=0.2**

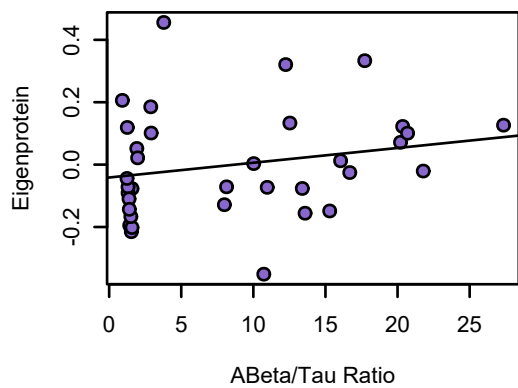

**bicor=0.015, p=0.94**  
**cor=-0.023, p=0.9**

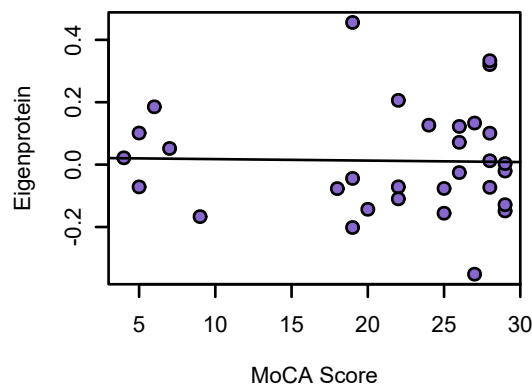

**bicor=0.21, p=0.41**  
**cor=0.19, p=0.45**

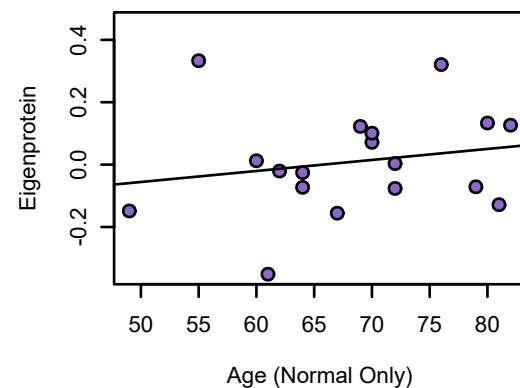

**bicor=0.023, p=0.93**  
**cor=0.074, p=0.78**

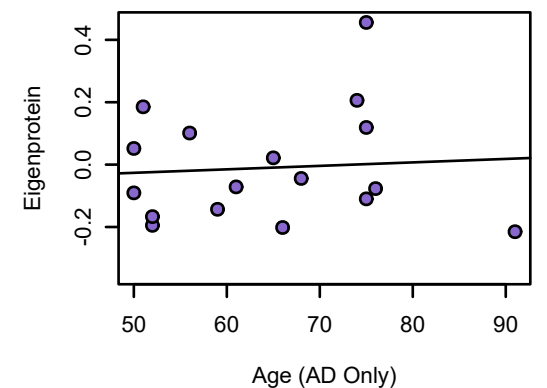

**M21 darkred.MEGATMT488**  
**MHC Complex/Immune**

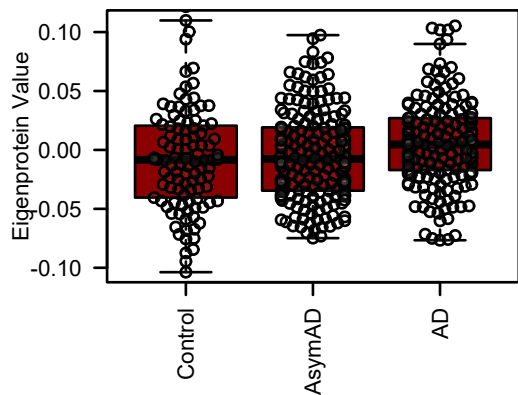

**MEdarkred.CSF 35 Samp. (Synthetic)**  
**ANOVA p: 0.11**

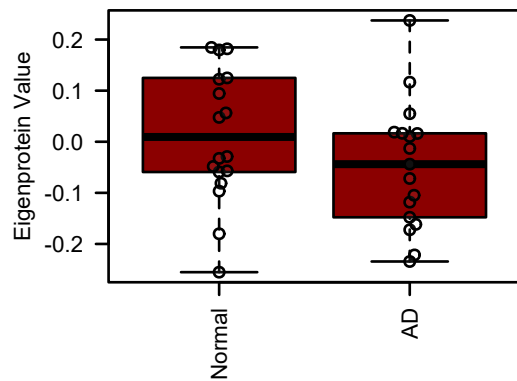

**MEdarkred.CSF (Synthetic)**  
**ANOVA p: 0.011**

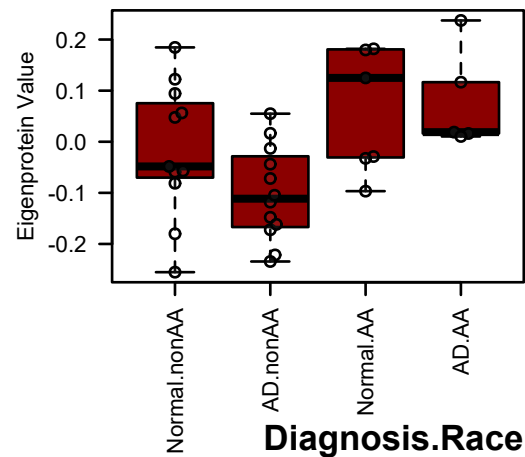

**MEdarkred.CSF (Synthetic)**  
**ANOVA p: 0.17**

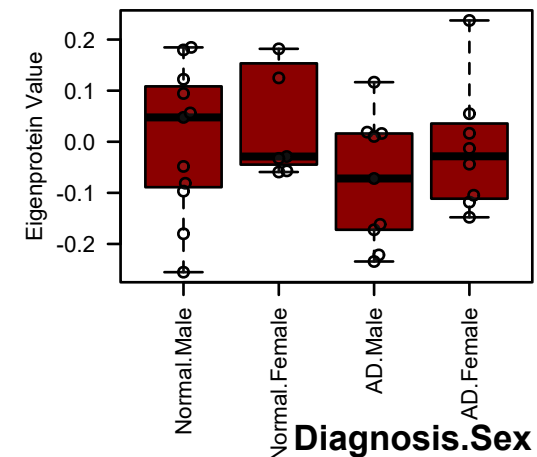

**bicor=0.36, p=0.033**  
**cor=0.42, p=0.012**

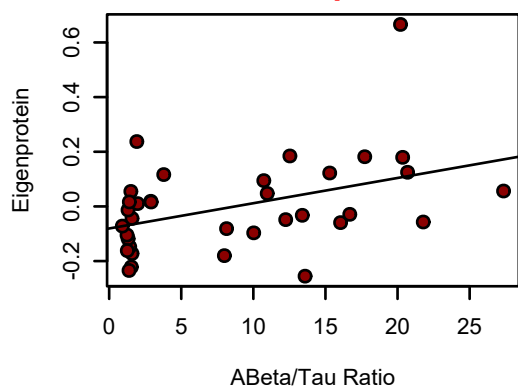

**bicor=0.1, p=0.58**  
**cor=0.0078, p=0.97**

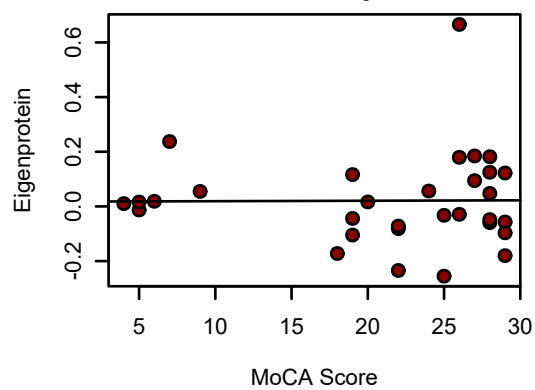

**bicor=-0.24, p=0.33**  
**cor=-0.13, p=0.61**

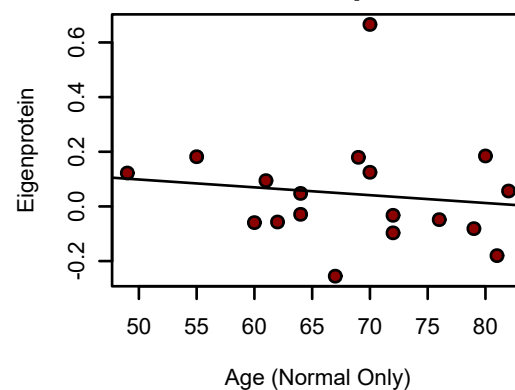

**bicor=-0.52, p=0.032**  
**cor=-0.54, p=0.025**

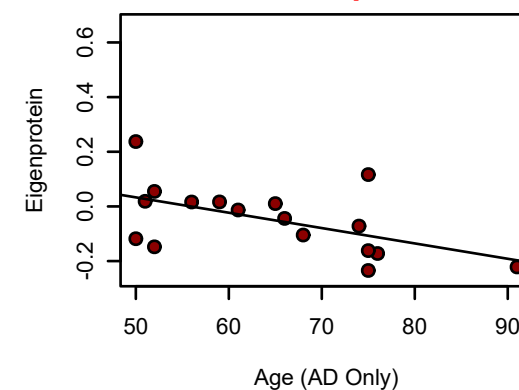

**M27 white.MEGATMT488**  
**Extracellular Matrix**

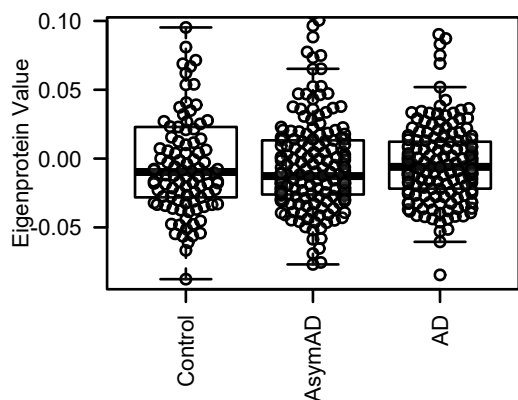

**MEwhite.CSF 35 Samp. (Synthetic)**  
**ANOVA p: 0.11**

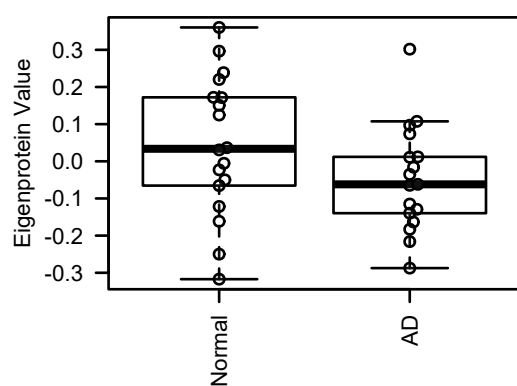

**MEwhite.CSF (Synthetic)**  
**ANOVA p: 0.14**

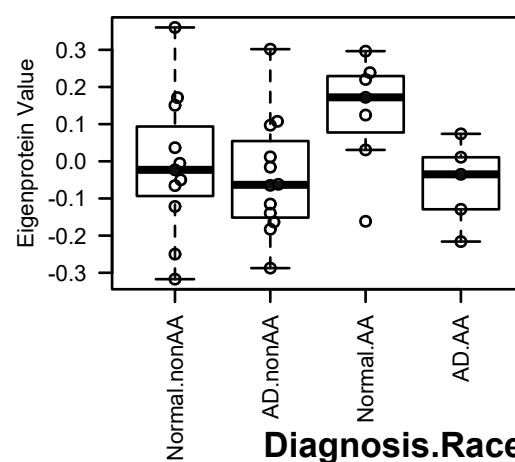

**MEwhite.CSF (Synthetic)**  
**ANOVA p: 0.0037**

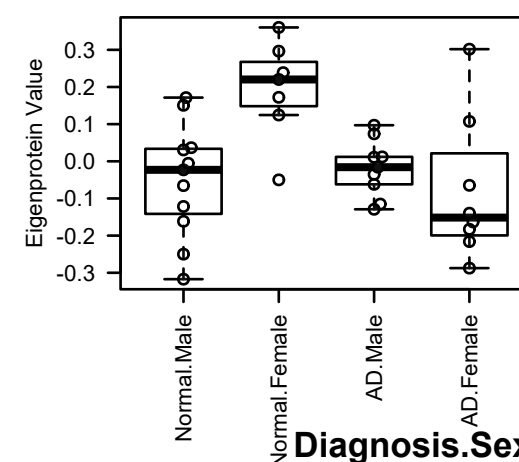

**bicor=0.41, p=0.013**  
**cor=0.39, p=0.021**

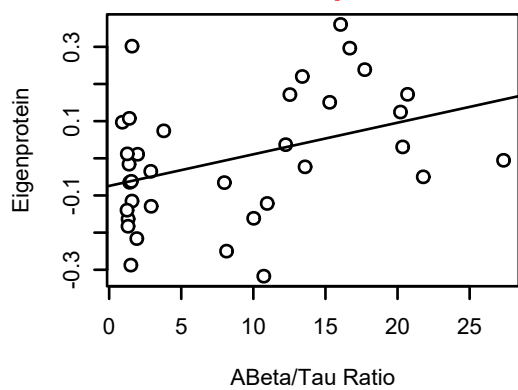

**bicor=0.27, p=0.13**  
**cor=0.39, p=0.03**

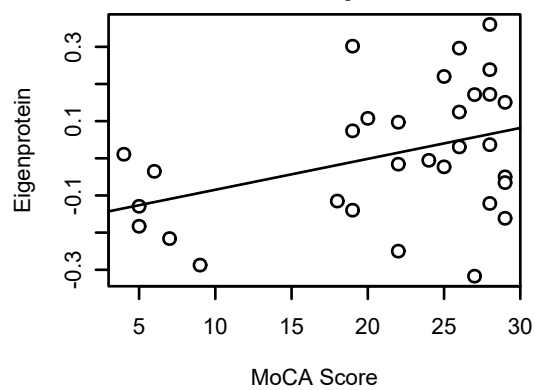

**bicor=-0.27, p=0.27**  
**cor=-0.27, p=0.28**

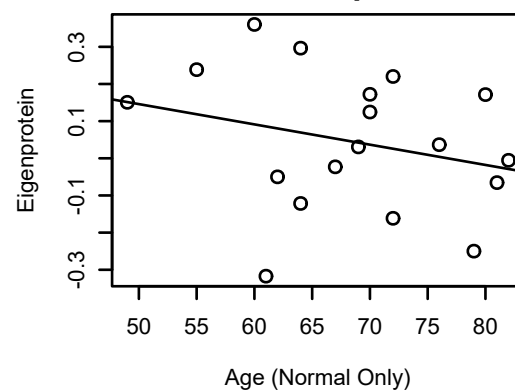

**bicor=0.43, p=0.086**  
**cor=0.37, p=0.14**

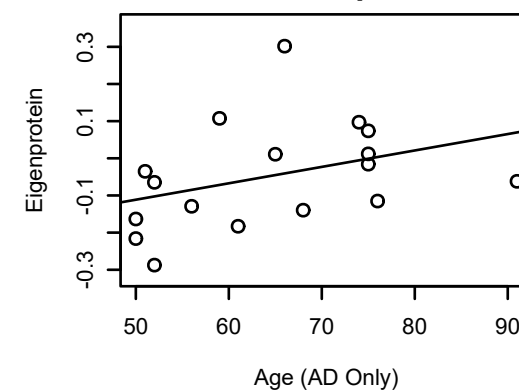

**M16 lightcyan.MEGATMT488**  
**RNA Binding**

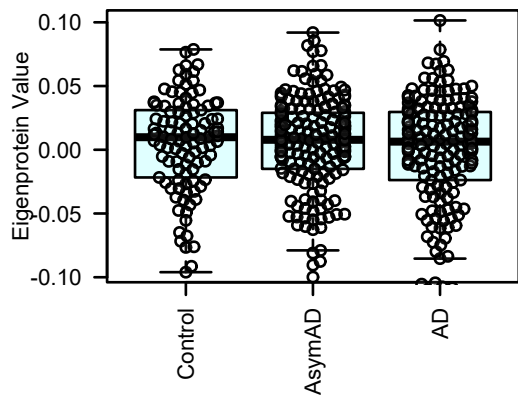

**MElightcyan.CSF 35 Samp. (Synthetic)**  
**ANOVA p: 0.18**

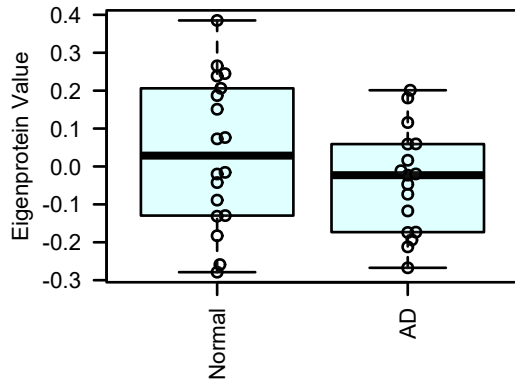

**MElightcyan.CSF (Synthetic)**  
**ANOVA p: 0.01**

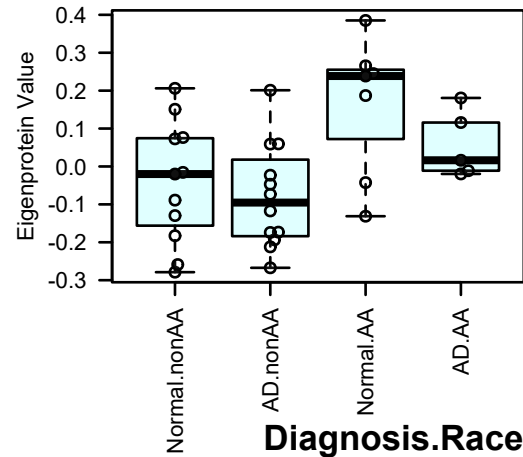

**MElightcyan.CSF (Synthetic)**  
**ANOVA p: 0.06**

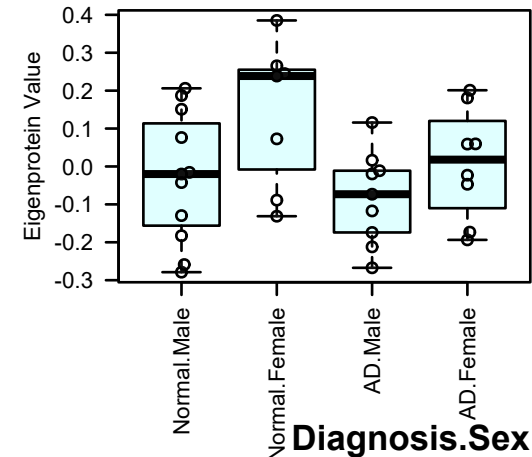

**bicor=0.44, p=0.0082**  
**cor=0.45, p=0.0067**

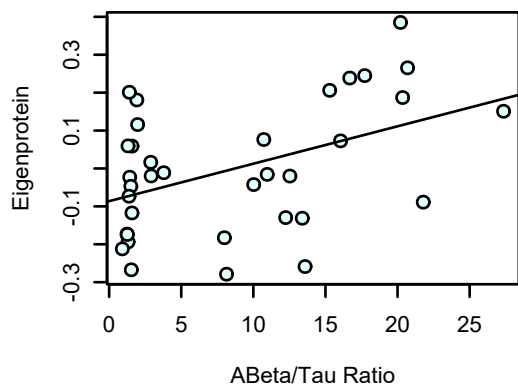

**bicor=0.1, p=0.59**  
**cor=0.008, p=0.97**

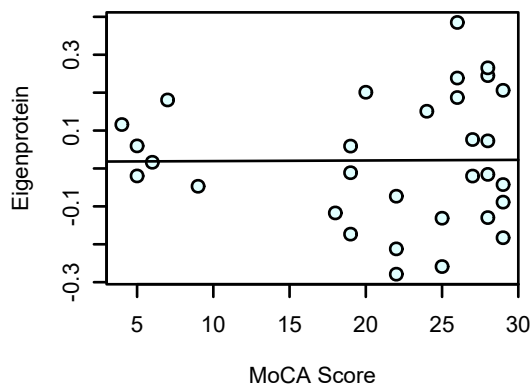

**bicor=-0.42, p=0.085**  
**cor=-0.41, p=0.091**

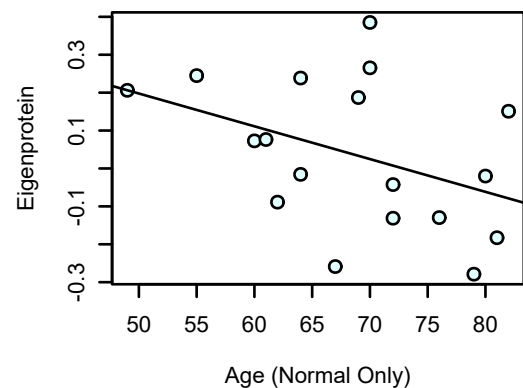

**bicor=-0.5, p=0.041**  
**cor=-0.53, p=0.029**

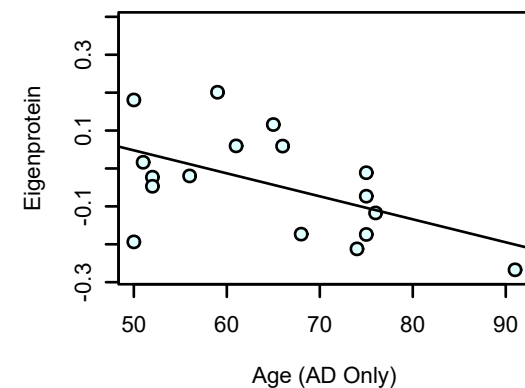

**M18 lightgreen.MEGATMT488**  
**RNA Splicing**

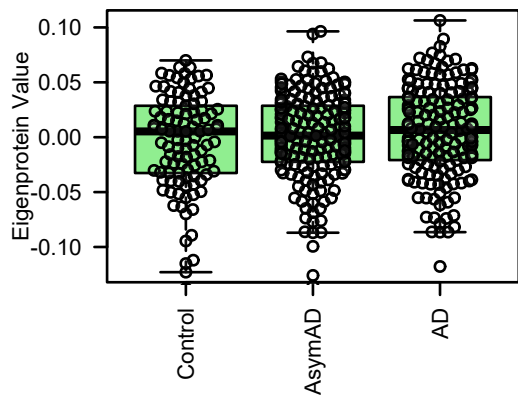

**MElightgreen.CSF 35 Samp. (Synthetic)**  
**ANOVA p: 0.65**

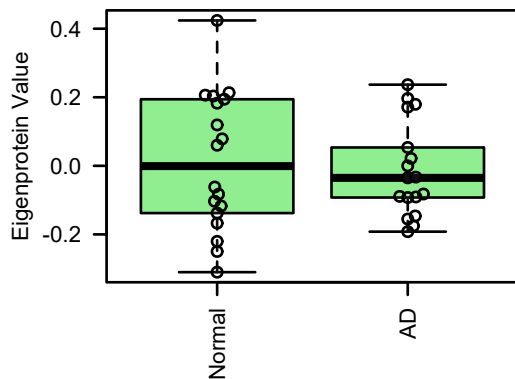

**MElightgreen.CSF (Synthetic)**  
**ANOVA p: 0.16**

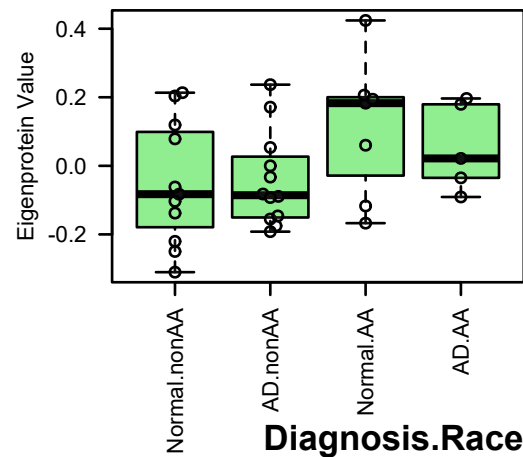

**MElightgreen.CSF (Synthetic)**  
**ANOVA p: 0.095**

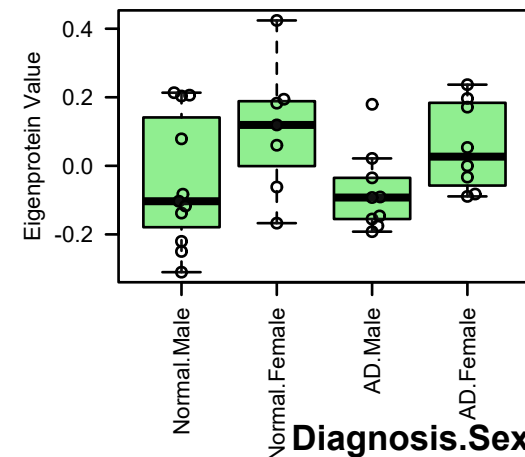

**bicor=0.31, p=0.066**  
**cor=0.34, p=0.046**

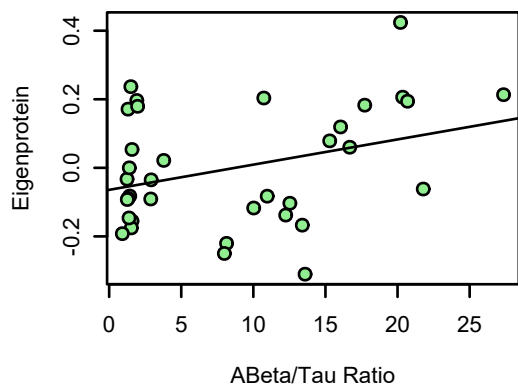

**bicor=-0.046, p=0.8**  
**cor=-0.18, p=0.33**

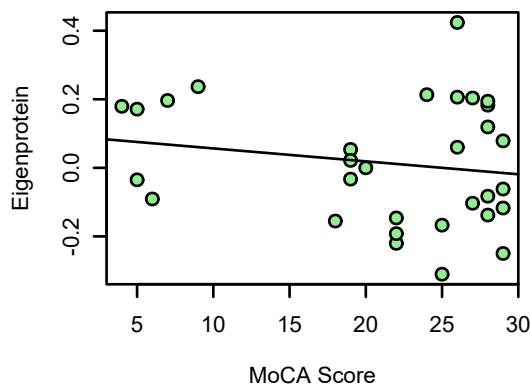

**bicor=-0.35, p=0.15**  
**cor=-0.33, p=0.18**

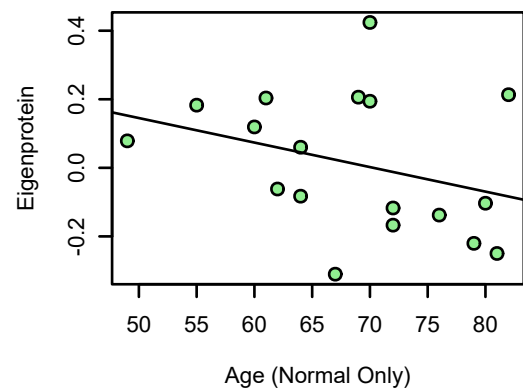

**bicor=-0.49, p=0.046**  
**cor=-0.49, p=0.046**

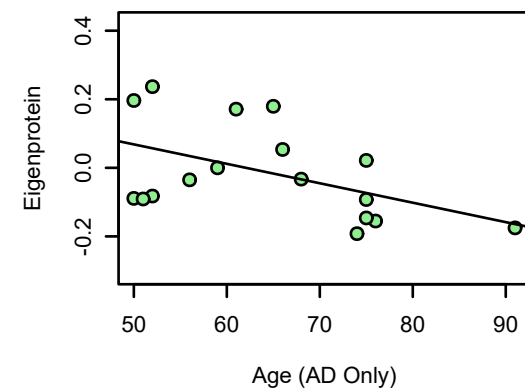

**M13 salmon.MEGATMT488**  
**RNA Splicing**

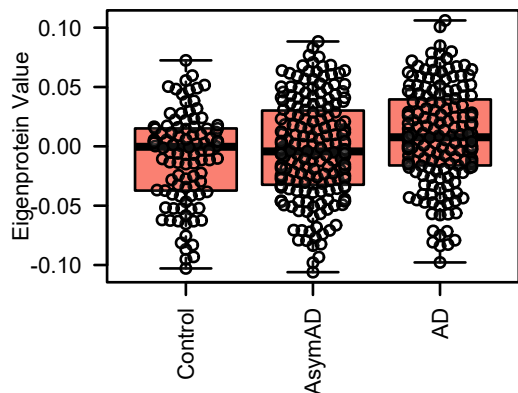

**MEsalmon.CSF 35 Samp. (Synthetic)**  
**ANOVA p: 0.12**

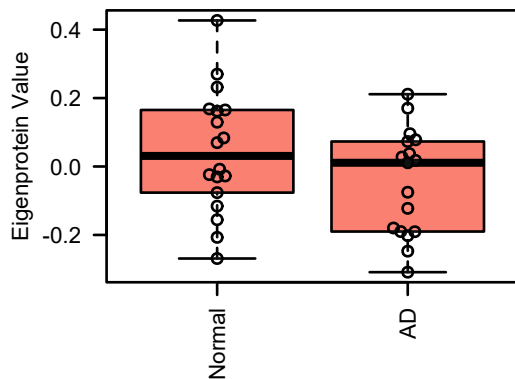

**MEsalmon.CSF (Synthetic)**  
**ANOVA p: 0.0022**

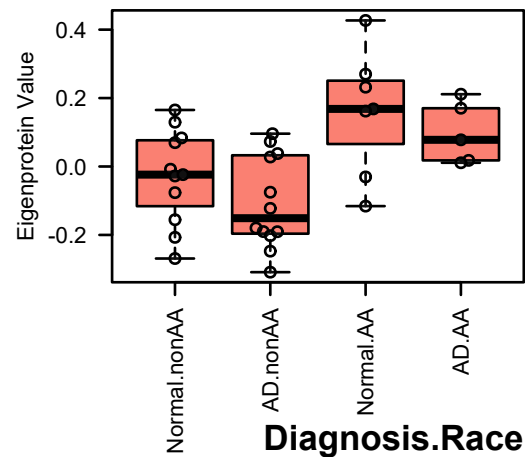

**MEsalmon.CSF (Synthetic)**  
**ANOVA p: 0.028**

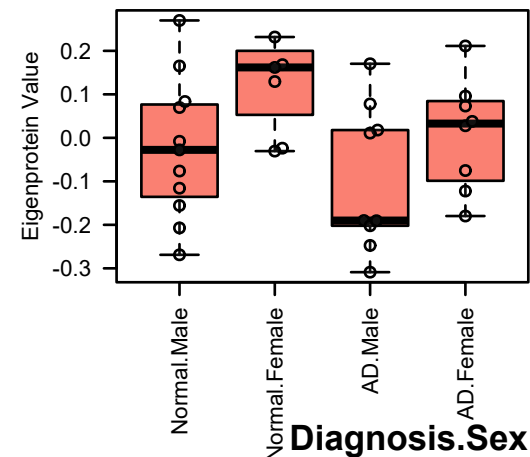

**bicor=0.45, p=0.0061**  
**cor=0.47, p=0.0044**

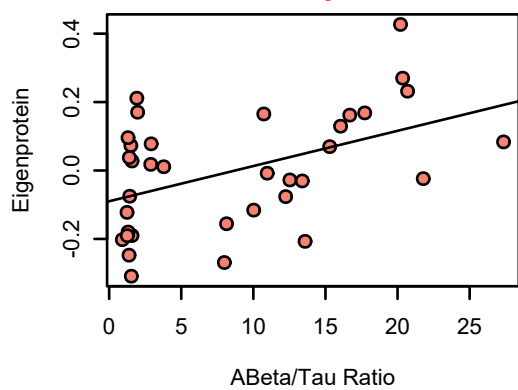

**bicor=0.11, p=0.57**  
**cor=-0.12, p=0.52**

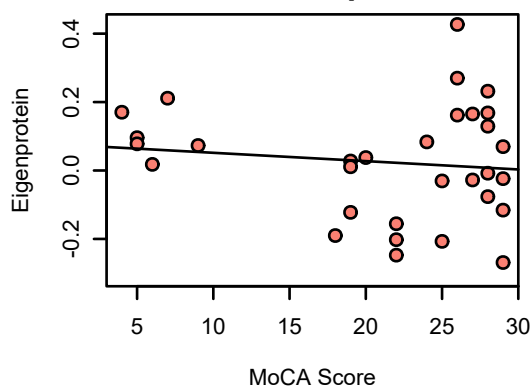

**bicor=-0.41, p=0.093**  
**cor=-0.37, p=0.13**

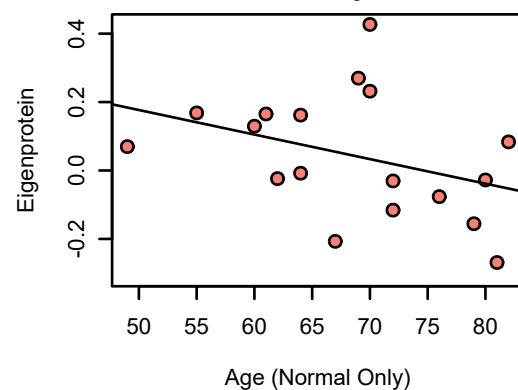

**bicor=-0.56, p=0.019**  
**cor=-0.64, p=0.0057**

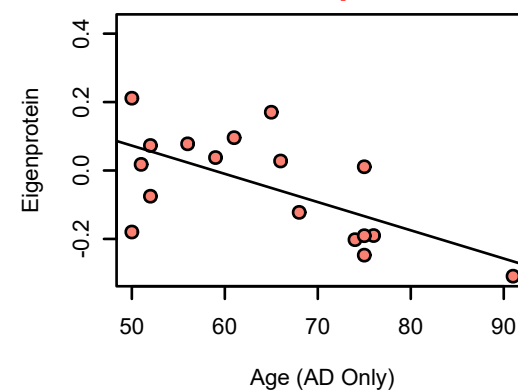

**M42 lightcyan1.MEGATMT488**  
**Matrisome**

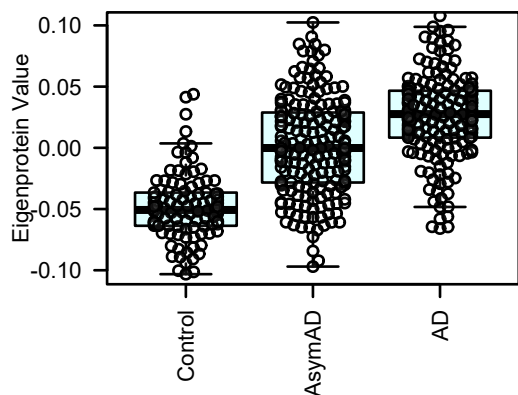

**MElightcyan1.CSF 35 Samp. (Synthetic)**  
**ANOVA p: 0.0046**

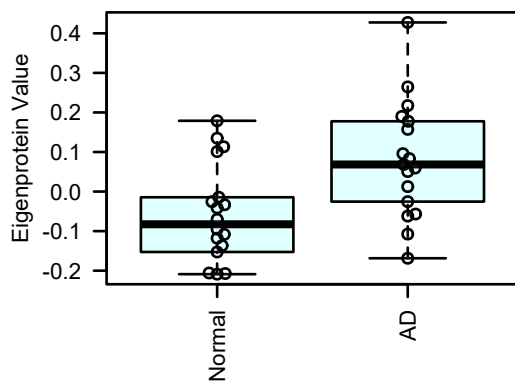

**MElightcyan1.CSF (Synthetic)**  
**ANOVA p: 0.0052**

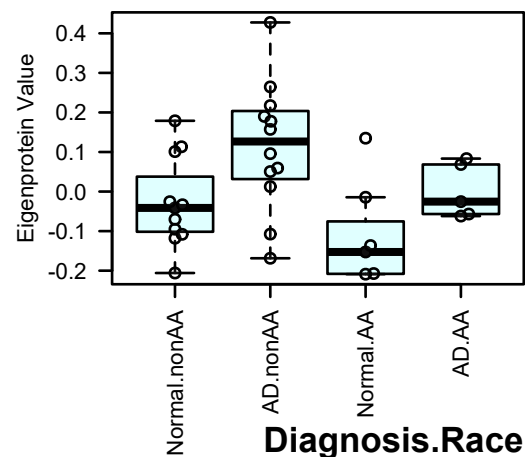

**MElightcyan1.CSF (Synthetic)**  
**ANOVA p: 0.024**

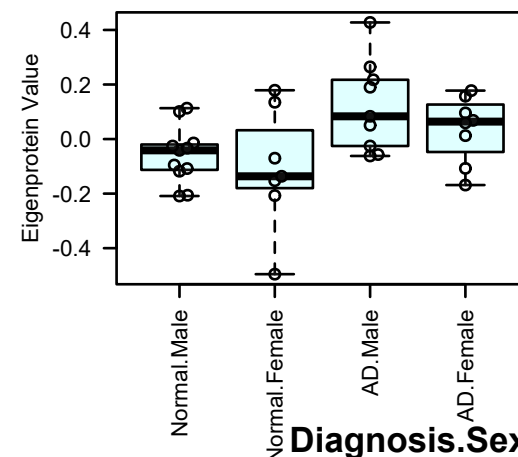

**bicor=-0.43, p=0.0091**  
**cor=-0.45, p=0.0067**

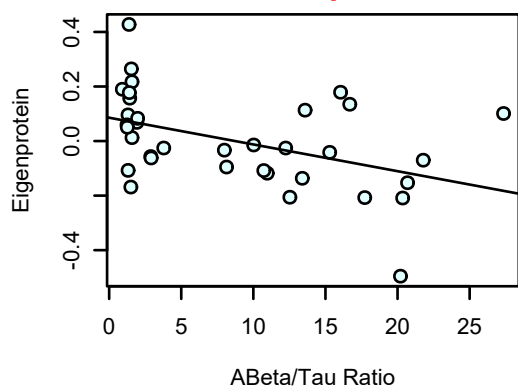

**bicor=-0.37, p=0.038**  
**cor=-0.2, p=0.28**

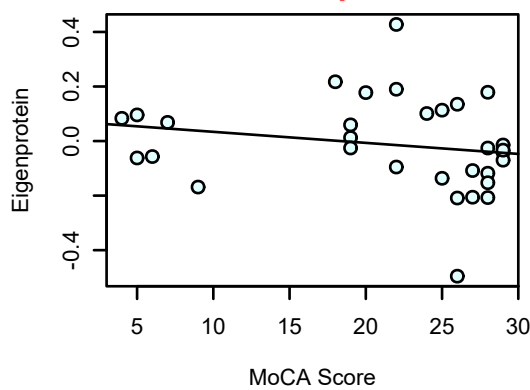

**bicor=-0.026, p=0.92**  
**cor=-0.045, p=0.86**

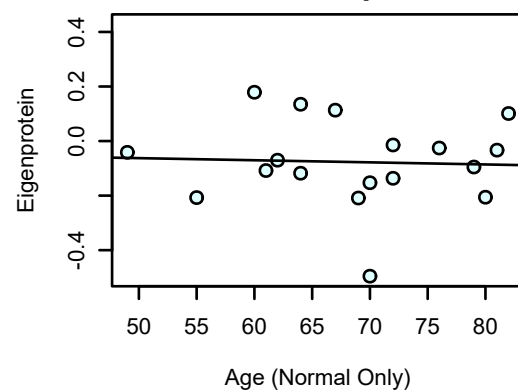

**bicor=0.59, p=0.012**  
**cor=0.6, p=0.011**

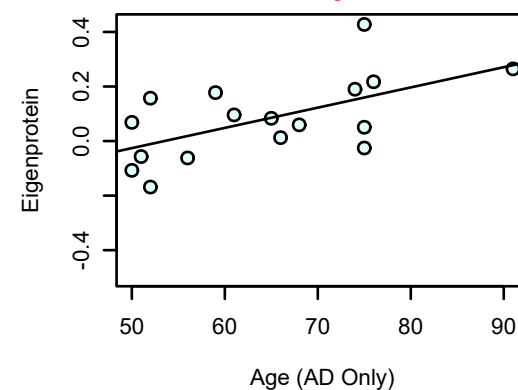

**M11 greenyellow.MEGATMT488**  
**Cell-ECM Interaction**

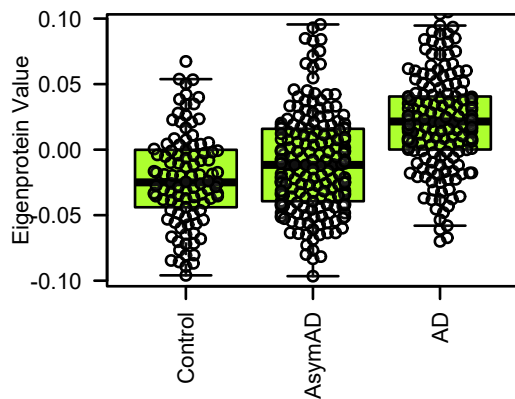

**MEgreenyellow.CSF 35 Samp. (Synthetic)**  
**ANOVA p: 0.35**

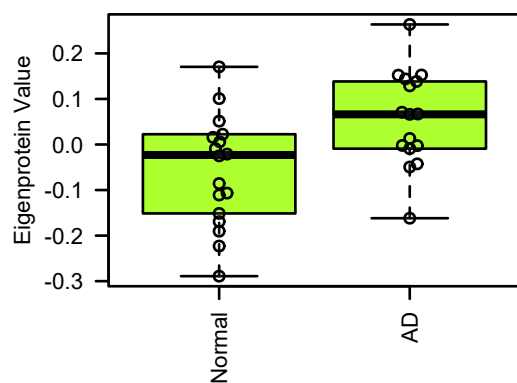

**MEgreenyellow.CSF (Synthetic)**  
**ANOVA p: 0.23**

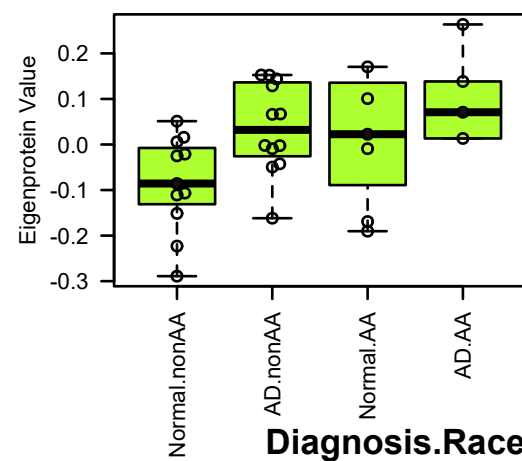

**MEgreenyellow.CSF (Synthetic)**  
**ANOVA p: 0.16**

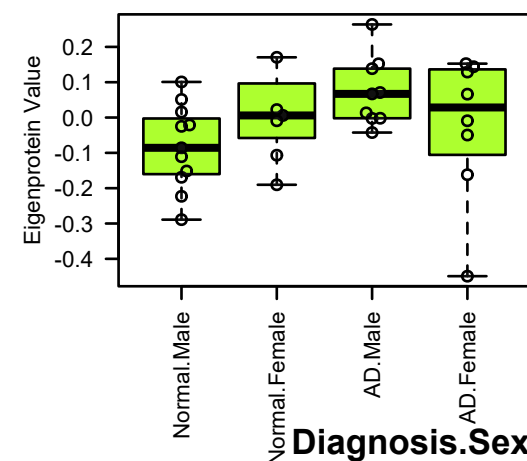

**bicor=-0.049, p=0.78**  
**cor=0.065, p=0.71**

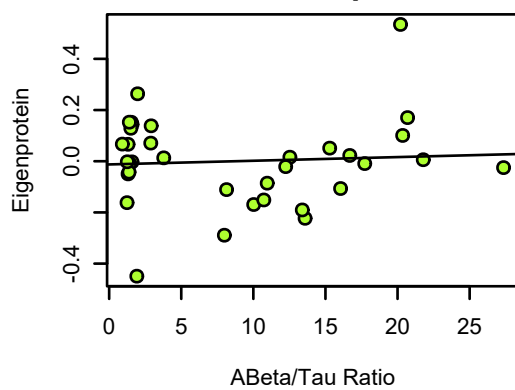

**bicor=-0.17, p=0.35**  
**cor=-0.16, p=0.39**

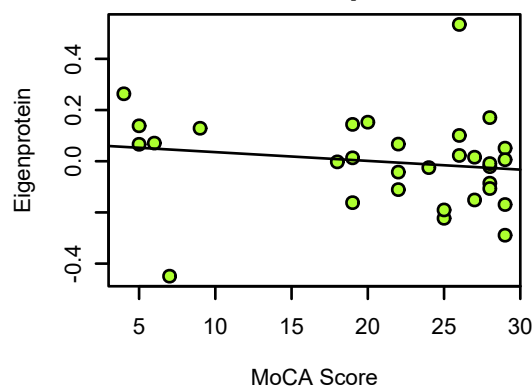

**bicor=-0.16, p=0.52**  
**cor=-0.12, p=0.64**

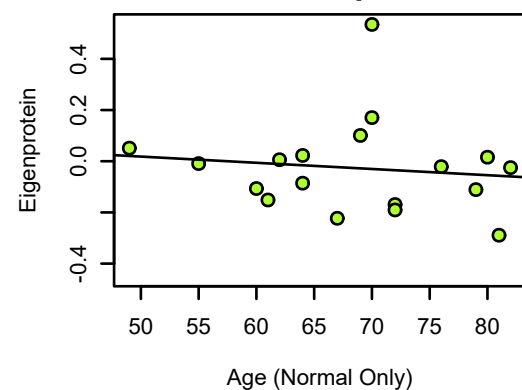

**bicor=0.018, p=0.95**  
**cor=0.22, p=0.4**

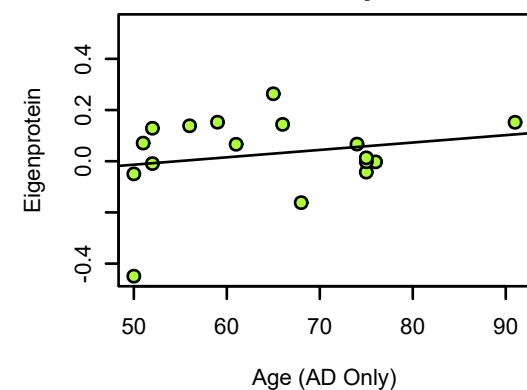

**M12 tan.MEGATMT488**  
**Cytoskeleton**

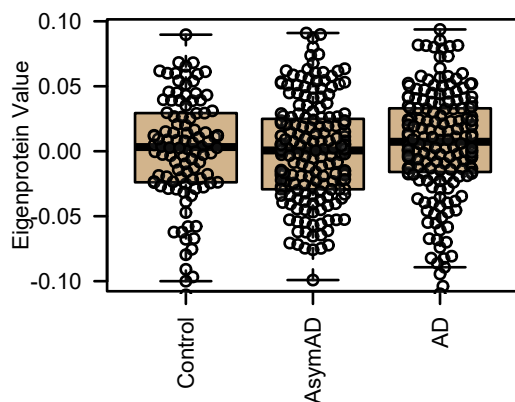

**MEtan.CSF 35 Samp. (Synthetic)**  
**ANOVA p: 0.28**

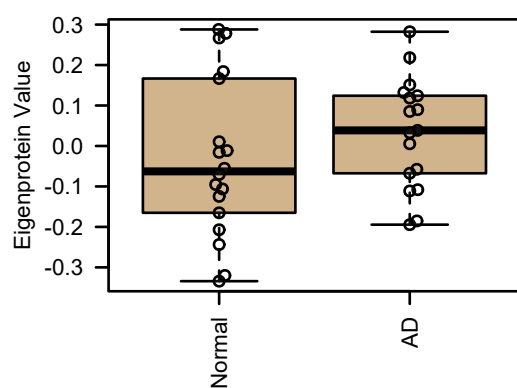

**MEtan.CSF (Synthetic)**  
**ANOVA p: 0.025**

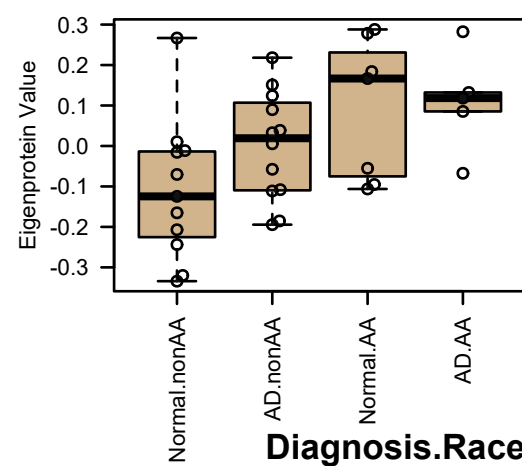

**MEtan.CSF (Synthetic)**  
**ANOVA p: 0.26**

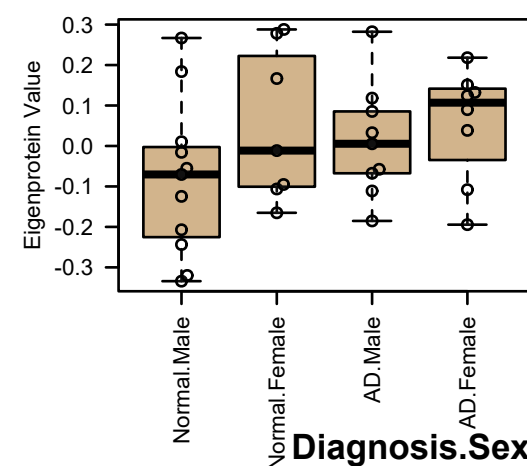

**bicor=0.024, p=0.89**  
**cor=0.034, p=0.85**

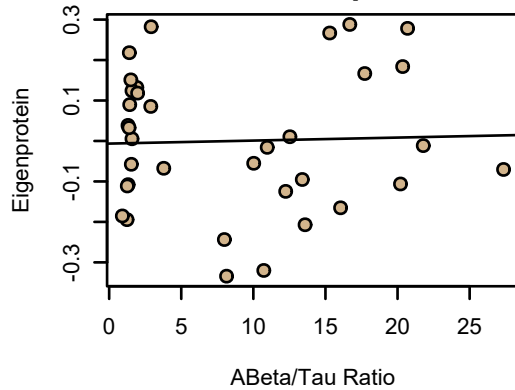

**bicor=-0.14, p=0.46**  
**cor=-0.3, p=0.1**

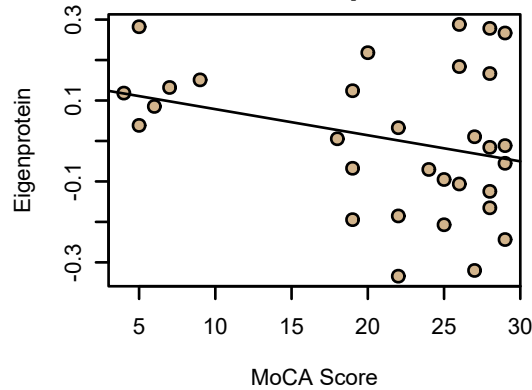

**bicor=-0.41, p=0.093**  
**cor=-0.42, p=0.083**

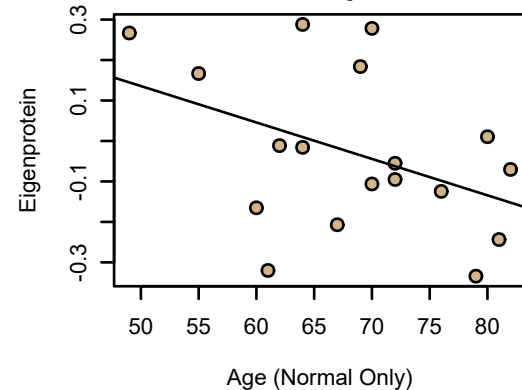

**bicor=-0.54, p=0.027**  
**cor=-0.51, p=0.036**

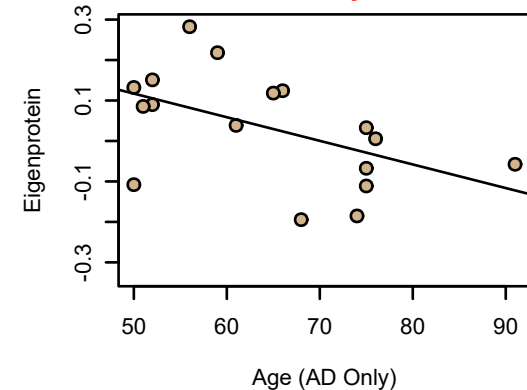

**M6 red.MEGATMT488  
Ribosome**

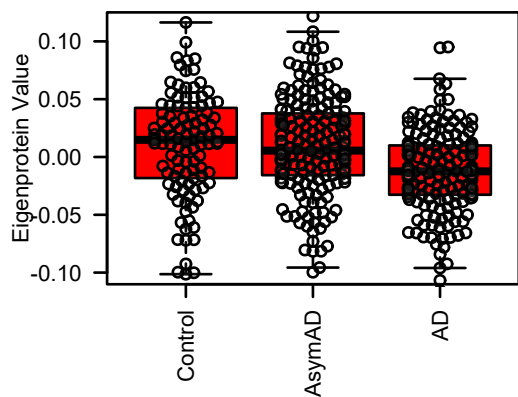

**MEred.Plasma 35 Samp. (Synthetic)  
ANOVA p: 0.00047**

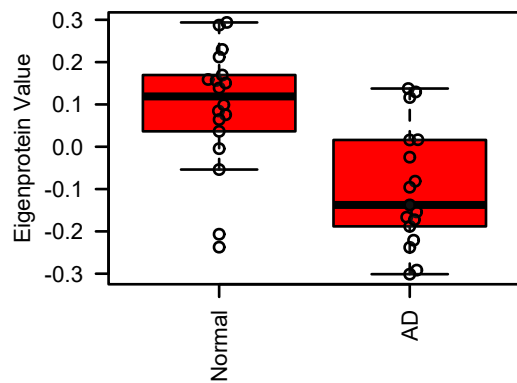

**MEred.Plasma (Synthetic)  
ANOVA p: 0.00015**

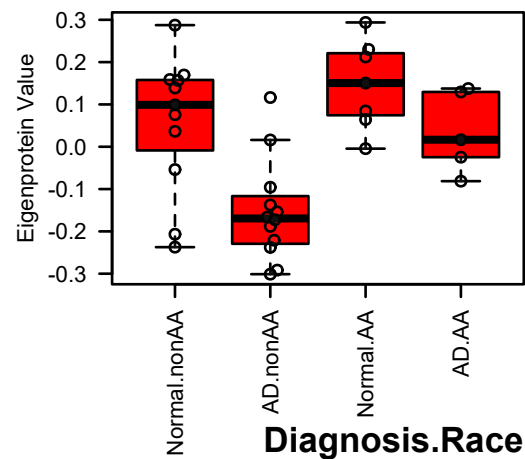

**MEred.Plasma (Synthetic)  
ANOVA p: 0.0049**

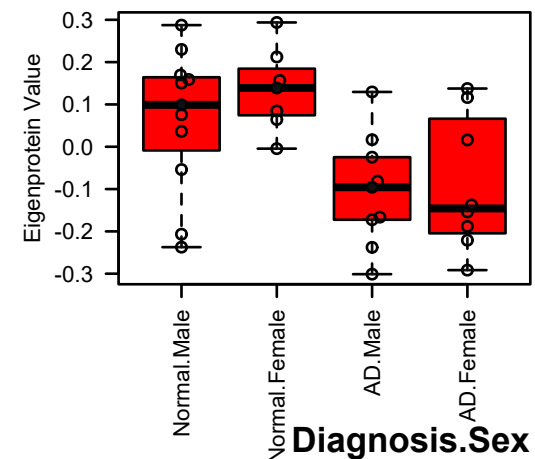

**bicor=0.57, p=0.00031  
cor=0.57, p=0.00035**

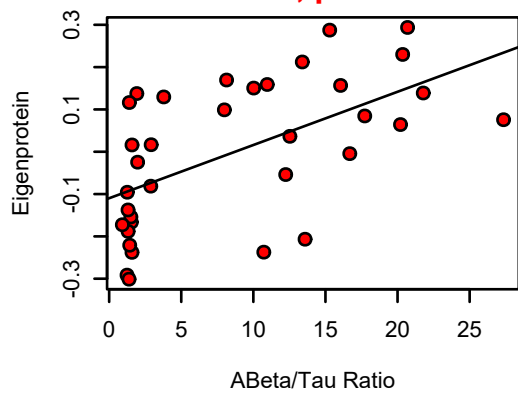

**bicor=0.5, p=0.0043  
cor=0.34, p=0.061**

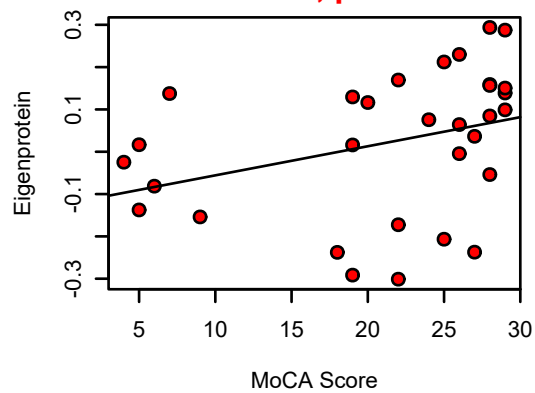

**bicor=-0.14, p=0.58  
cor=-0.07, p=0.78**

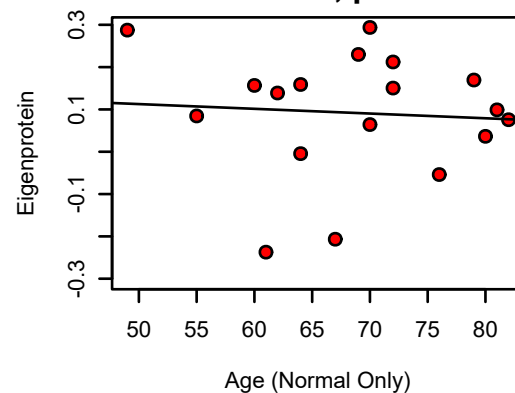

**bicor=-0.25, p=0.34  
cor=-0.24, p=0.35**

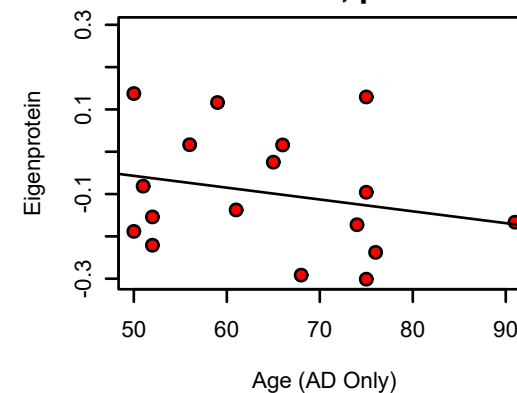

**M17 grey60.MEGATMT488  
Transcription**

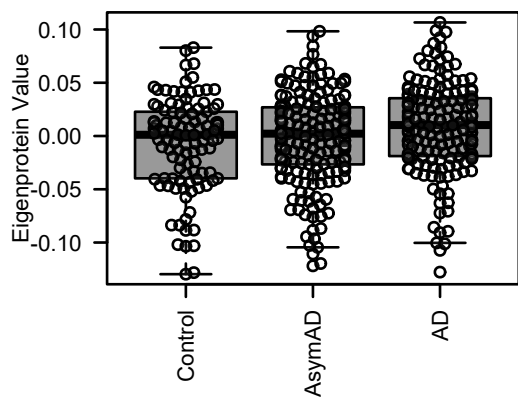

**MEgrey60.Plasma 35 Samp. (Synthetic)  
ANOVA p: 0.00027**

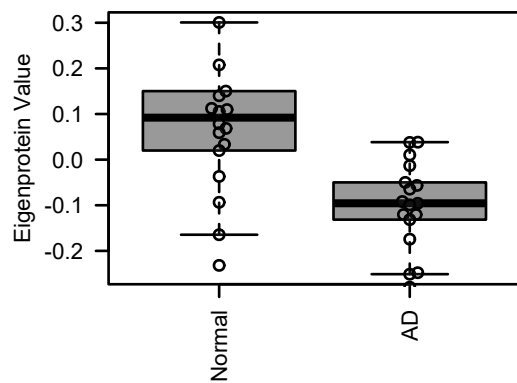

**MEgrey60.Plasma (Synthetic)  
ANOVA p: 0.0014**

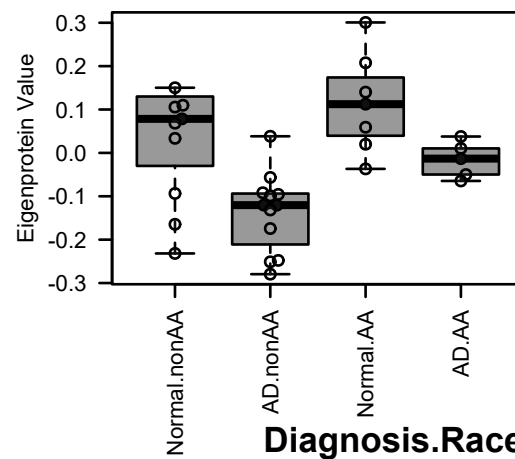

**MEgrey60.Plasma (Synthetic)  
ANOVA p: 0.0044**

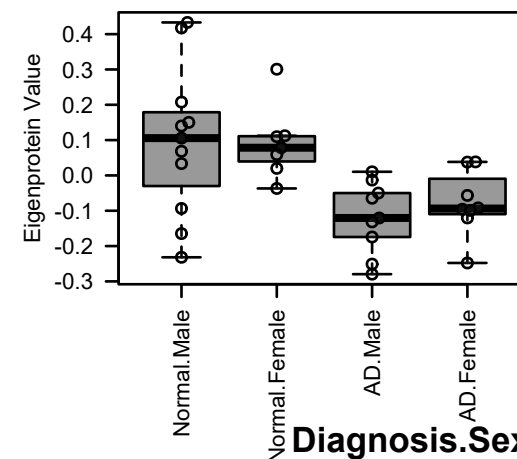

**bicor=0.56, p=0.00047  
cor=0.5, p=0.0022**

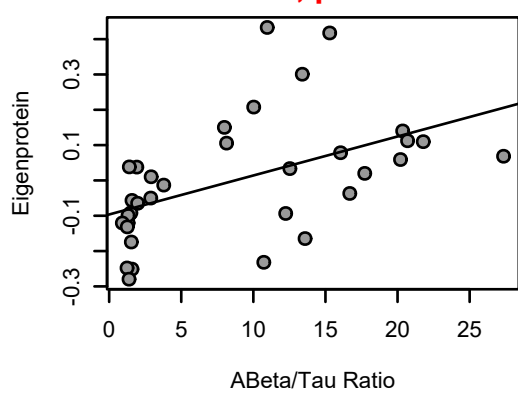

**bicor=0.55, p=0.0014  
cor=0.37, p=0.04**

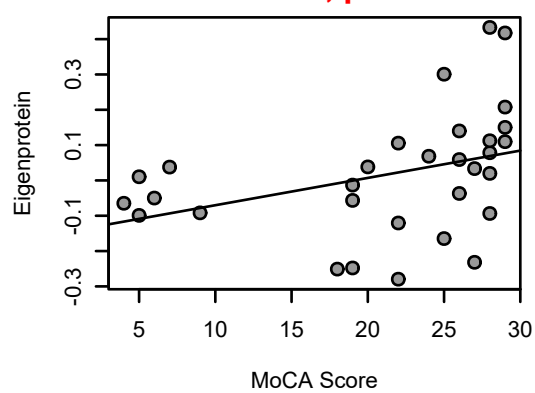

**bicor=-0.037, p=0.88  
cor=-0.14, p=0.58**

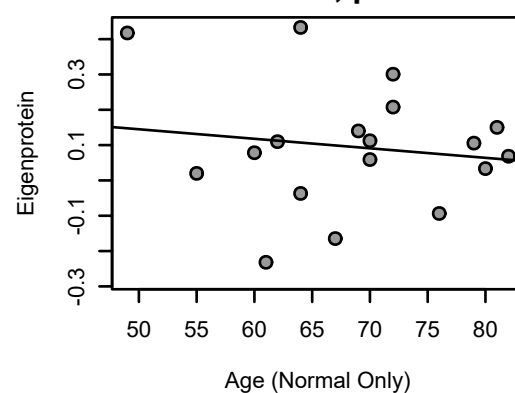

**bicor=-0.55, p=0.022  
cor=-0.54, p=0.025**

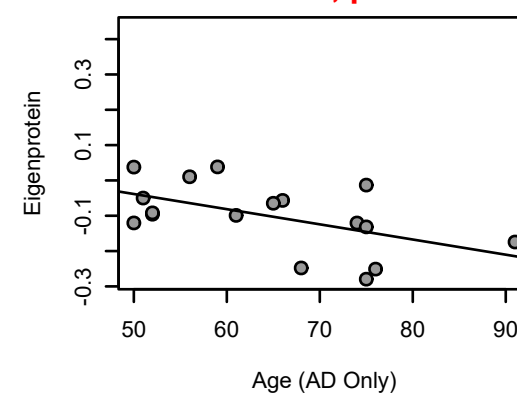

**M9 magenta.MEGATMT488**  
**Golgi**

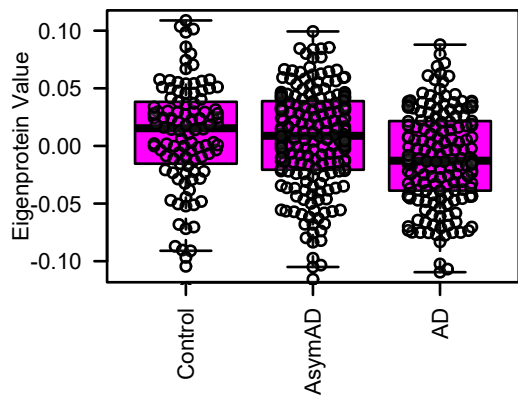

**MEmagenta.Plasma 35 Samp. (Synthetic)**  
**ANOVA p: 3.8e-05**

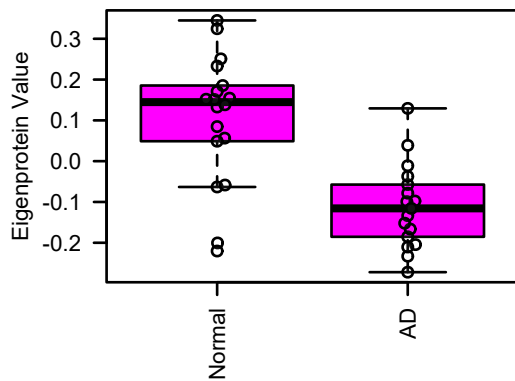

**MEmagenta.Plasma (Synthetic)**  
**ANOVA p: 1e-04**

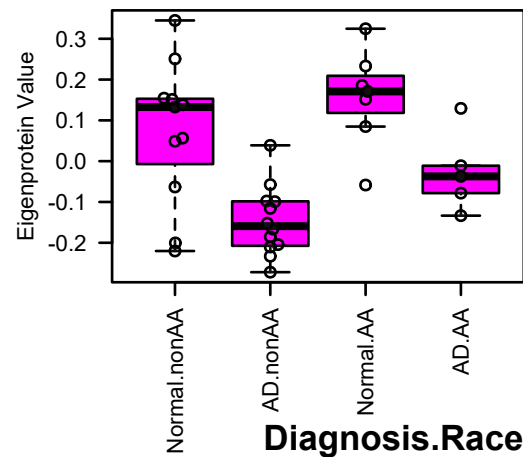

**MEmagenta.Plasma (Synthetic)**  
**ANOVA p: 0.00066**

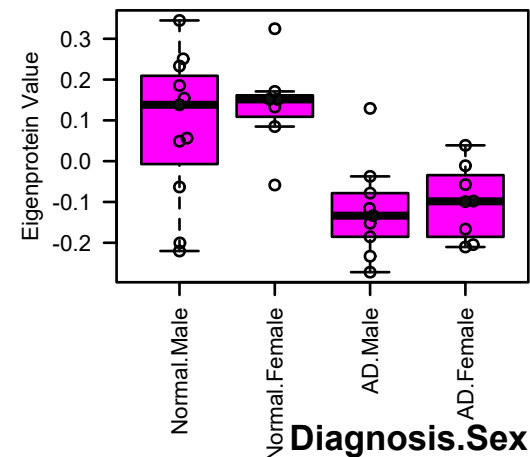

**bicor=0.62, p=6.6e-05**  
**cor=0.6, p=0.00014**

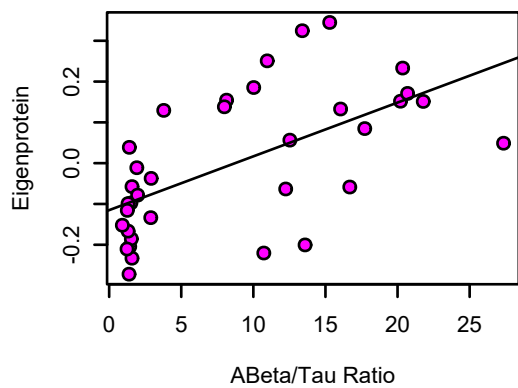

**bicor=0.57, p=0.00085**  
**cor=0.45, p=0.011**

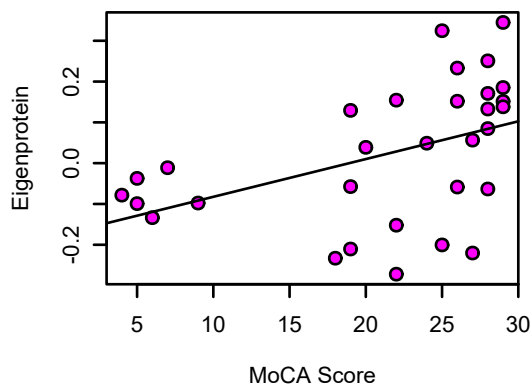

**bicor=-0.1, p=0.69**  
**cor=-0.094, p=0.71**

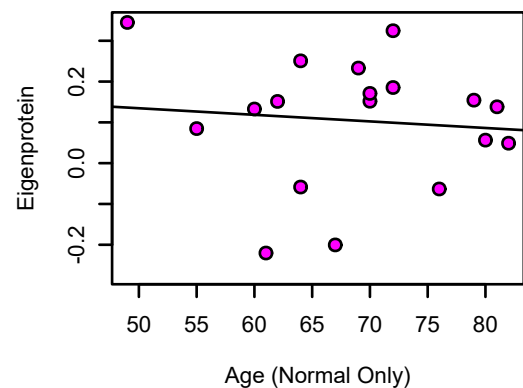

**bicor=-0.25, p=0.33**  
**cor=-0.21, p=0.42**

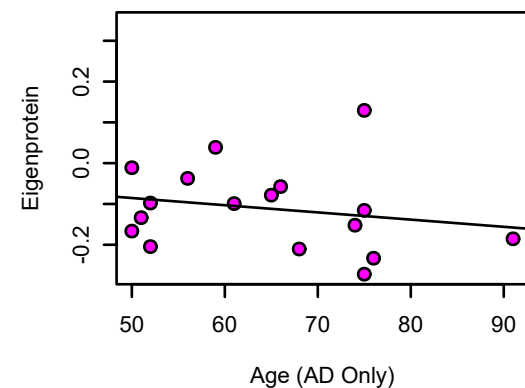

**M22 darkgreen.MEGATMT488**  
**Post-Synaptic Density**

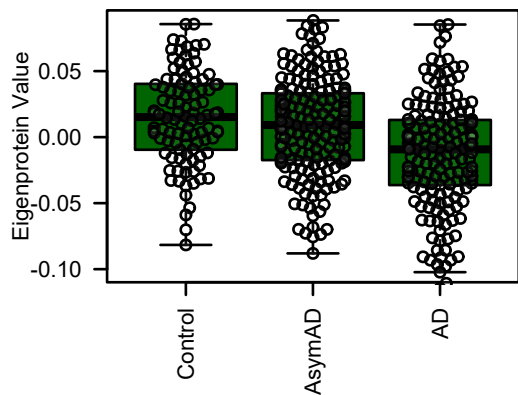

**MEdarkgreen.Plasma 35 Samp. (Synthetic)**  
**ANOVA p: 2.9e-05**

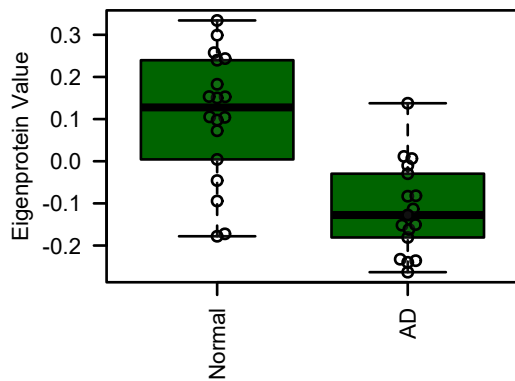

**MEdarkgreen.Plasma (Synthetic)**  
**ANOVA p: 7.9e-05**

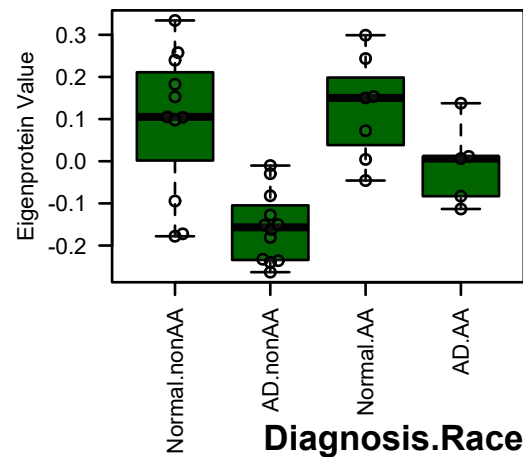

**MEdarkgreen.Plasma (Synthetic)**  
**ANOVA p: 0.00035**

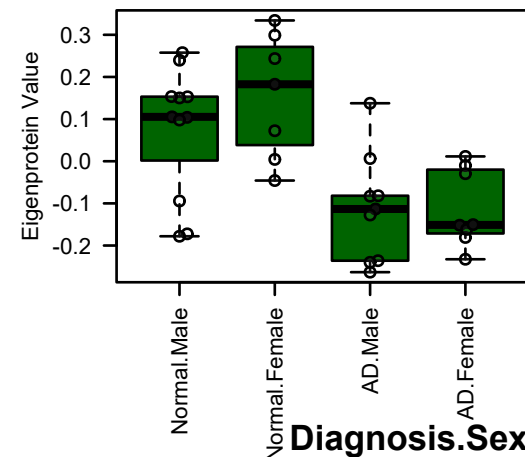

**bicor=0.64, p=3.7e-05**  
**cor=0.62, p=7.1e-05**

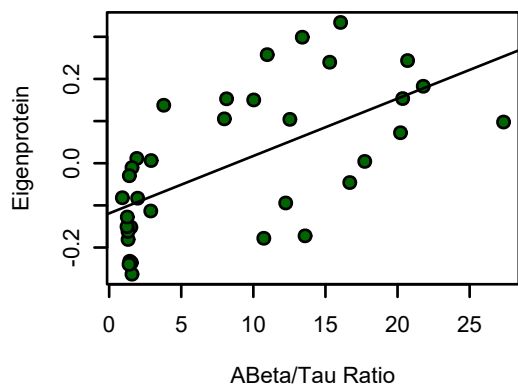

**bicor=0.51, p=0.0031**  
**cor=0.48, p=0.0063**

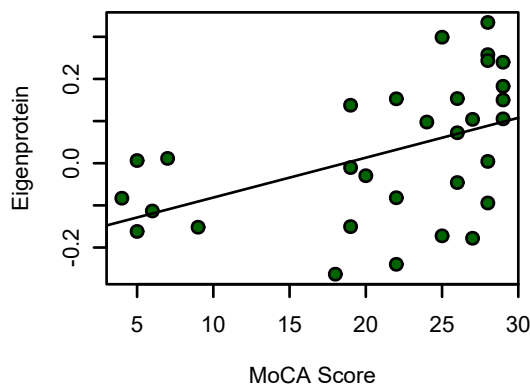

**bicor=-0.043, p=0.86**  
**cor=-0.053, p=0.83**

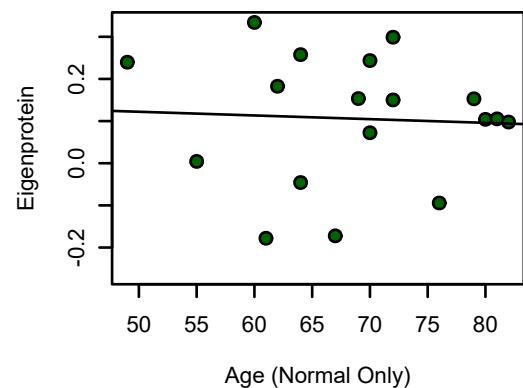

**bicor=-0.19, p=0.46**  
**cor=-0.17, p=0.51**

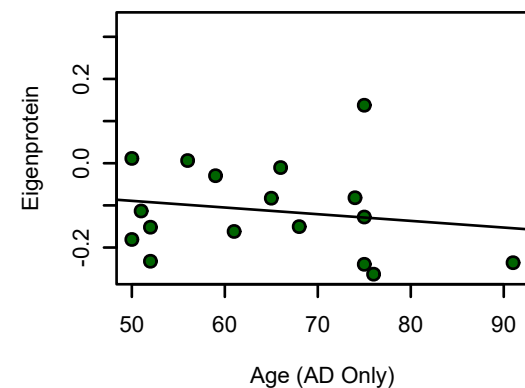



**M5 green.MEGATMT488**  
Post-Synaptic Density

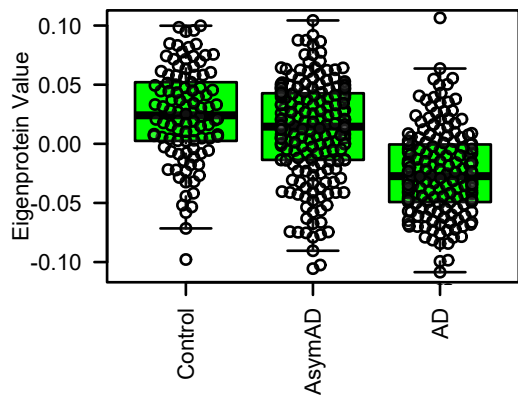

**MEgreen.Plasma 35 Samp. (Synthetic)**  
ANOVA p: 7.7e-05

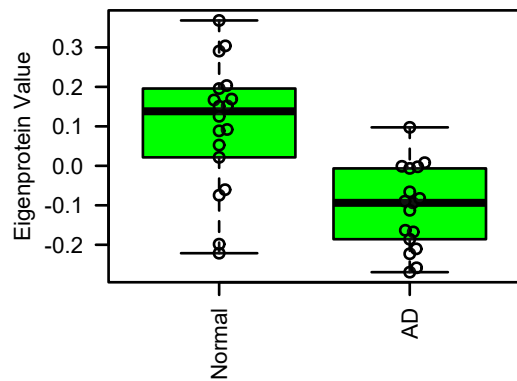

**MEgreen.Plasma (Synthetic)**  
ANOVA p: 0.00045

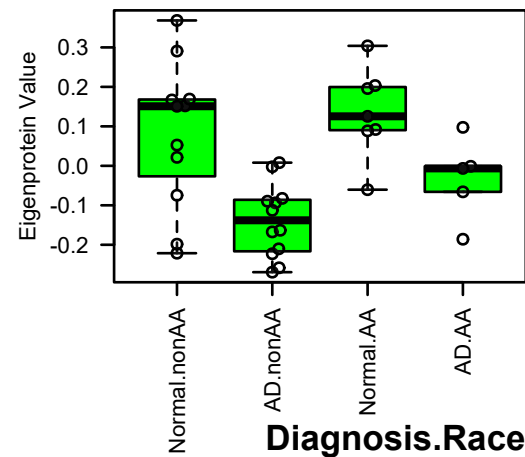

**MEgreen.Plasma (Synthetic)**  
ANOVA p: 0.0013

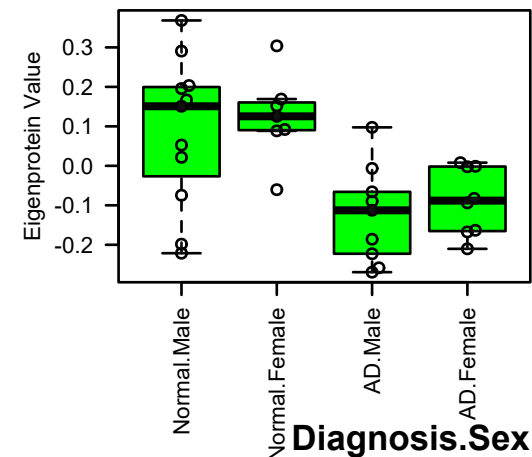

**bicor=0.58, p=0.00024**  
**cor=0.56, p=0.00047**

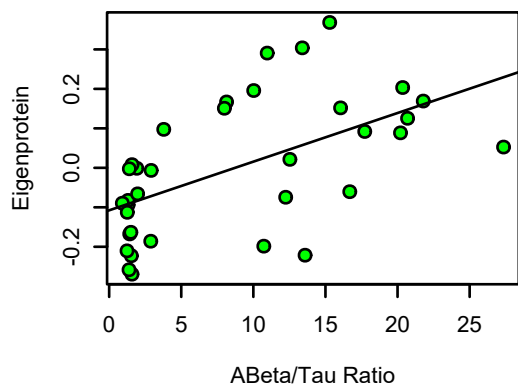

**bicor=0.54, p=0.0018**  
**cor=0.46, p=0.0092**

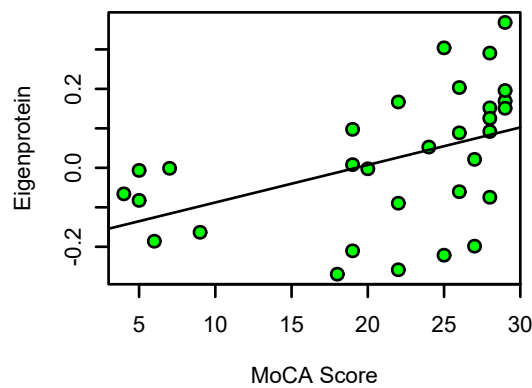

**bicor=-0.17, p=0.5**  
**cor=-0.15, p=0.55**

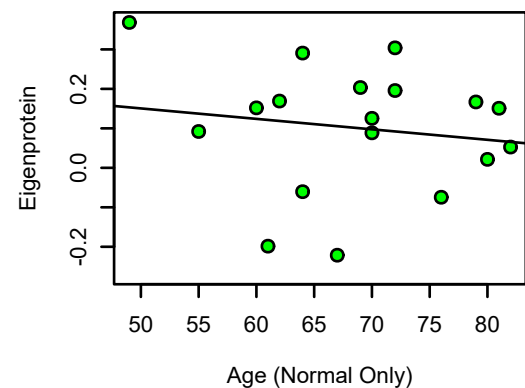

**bicor=-0.24, p=0.36**  
**cor=-0.26, p=0.31**

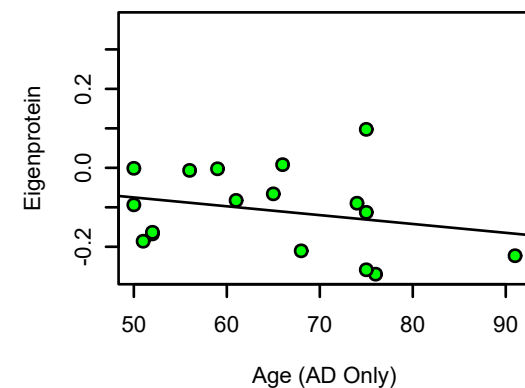

**M10 purple.MEGATMT488**  
Ambiguous

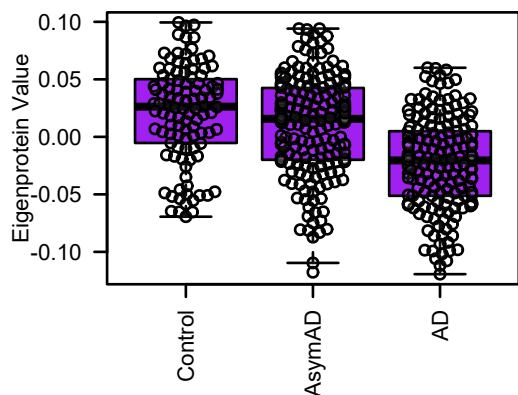

**MEpurple.Plasma 35 Samp. (Synthetic)**  
ANOVA p: 6.6e-05

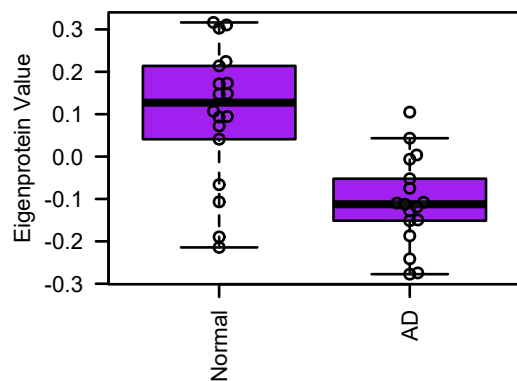

**MEpurple.Plasma (Synthetic)**  
ANOVA p: 0.00014

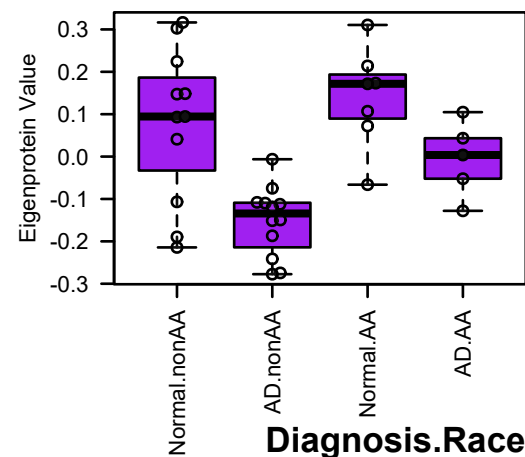

**MEpurple.Plasma (Synthetic)**  
ANOVA p: 9e-04

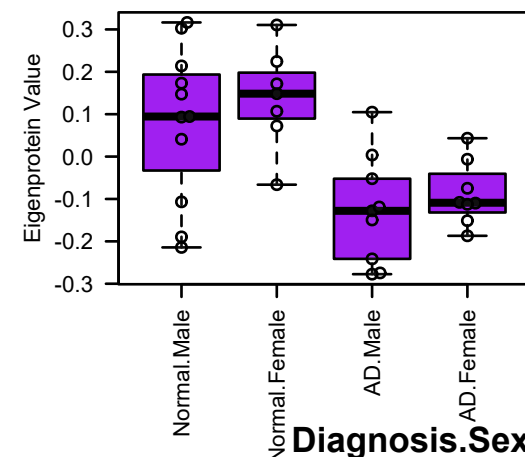

**bicor=0.61, p=0.00011**  
**cor=0.58, p=0.00026**

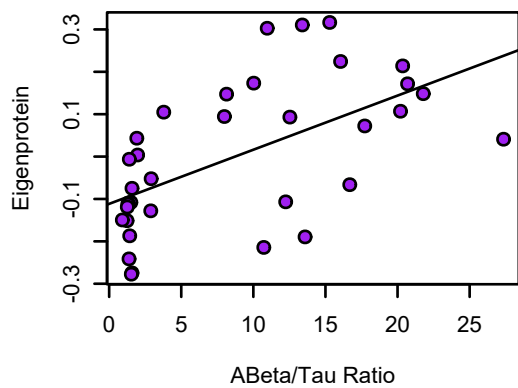

**bicor=0.56, p=0.00094**  
**cor=0.42, p=0.019**

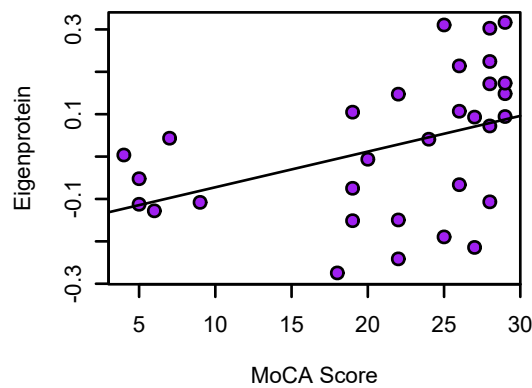

**bicor=-0.16, p=0.54**  
**cor=-0.14, p=0.58**

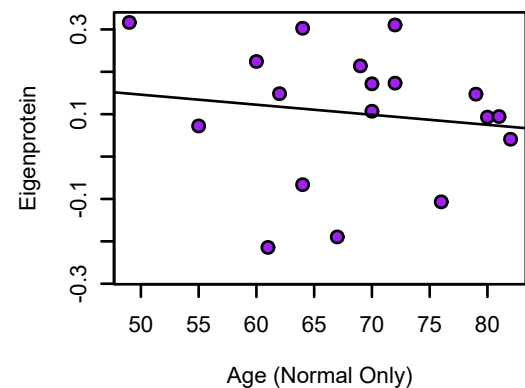

**bicor=-0.41, p=0.1**  
**cor=-0.4, p=0.11**

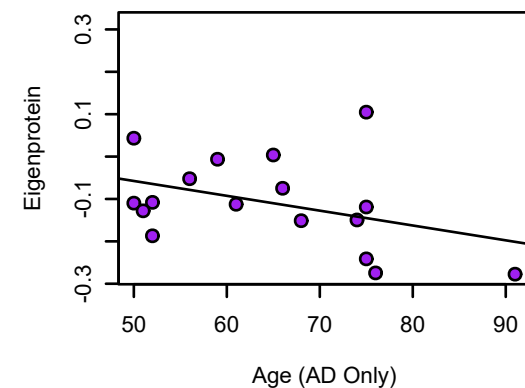

**M29 saddlebrown.MEGATMT488**  
Glycosylation/ER

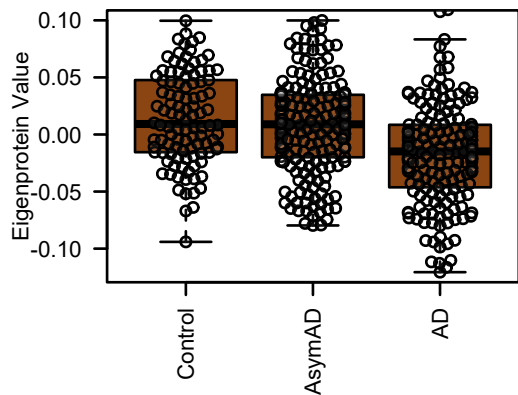

**MEsaddlebrown.Plasma 35 Samp. (Syntheti**  
ANOVA p: 1.5e-06

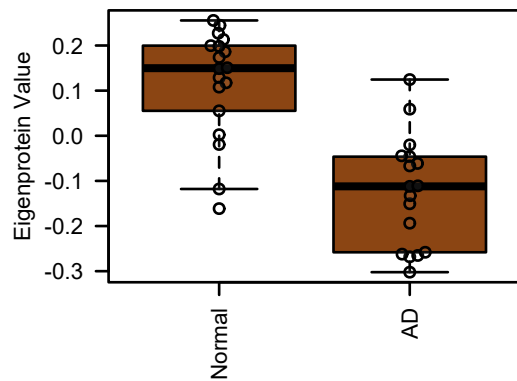

**MEsaddlebrown.Plasma (Synthetic)**  
ANOVA p: 2.2e-06

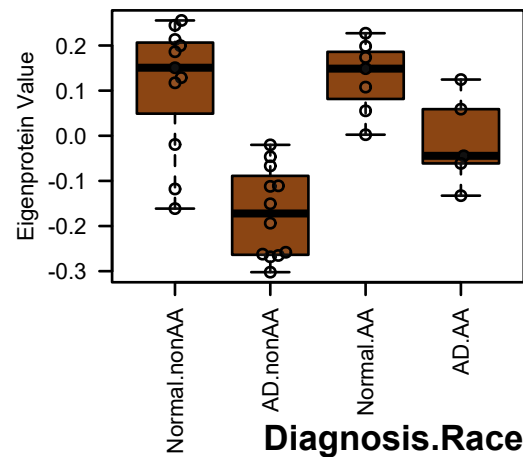

**MEsaddlebrown.Plasma (Synthetic)**  
ANOVA p: 4.3e-05

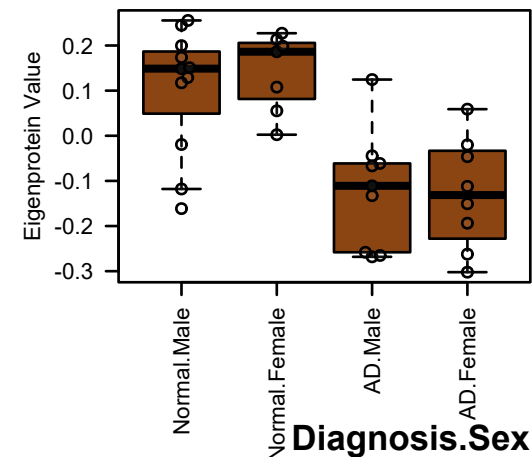

**bicor=0.69, p=4.9e-06**  
**cor=0.67, p=1.1e-05**

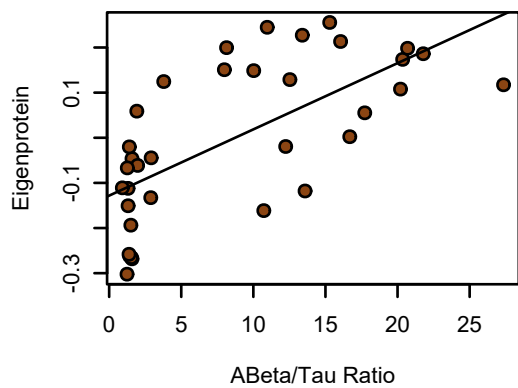

**bicor=0.65, p=7.4e-05**  
**cor=0.5, p=0.0042**

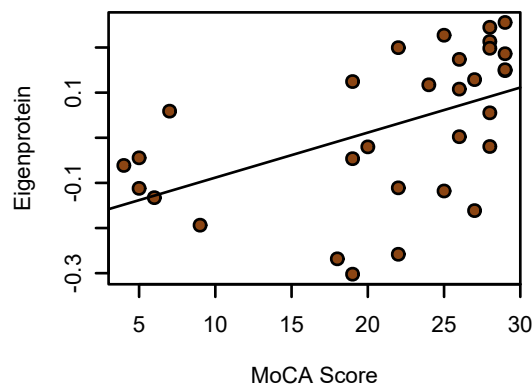

**bicor=-0.045, p=0.86**  
**cor=0.015, p=0.95**

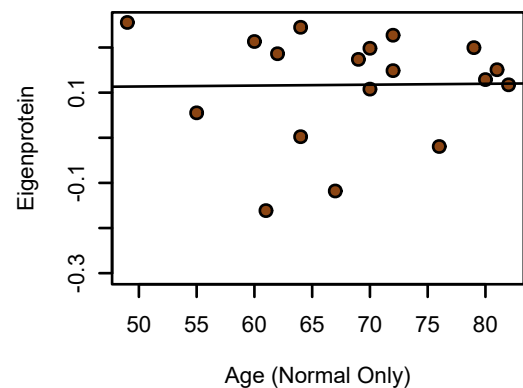

**bicor=-0.19, p=0.46**  
**cor=-0.2, p=0.44**

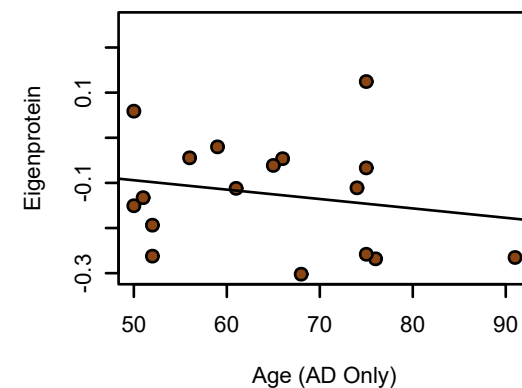

**M28 skyblue.MEGATMT488**  
Ribosome/Translation

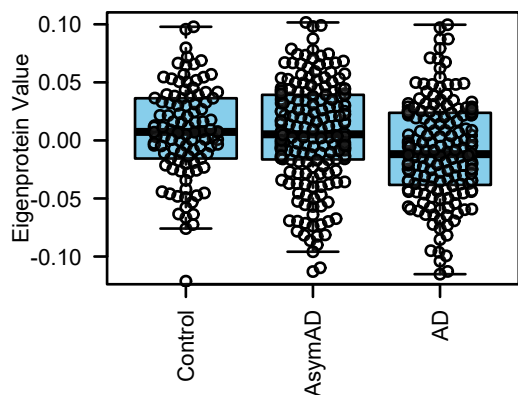

**MEskyblue.Plasma 35 Samp. (Synthetic)**  
ANOVA p: 1e-04

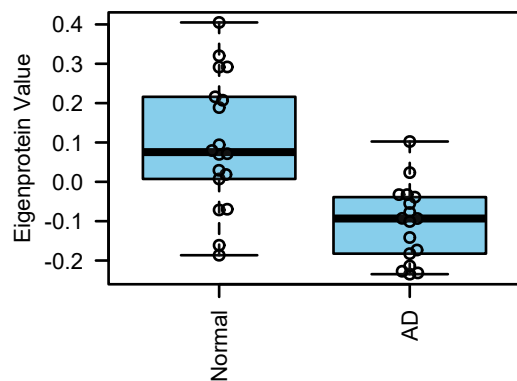

**MEskyblue.Plasma (Synthetic)**  
ANOVA p: 0.00081

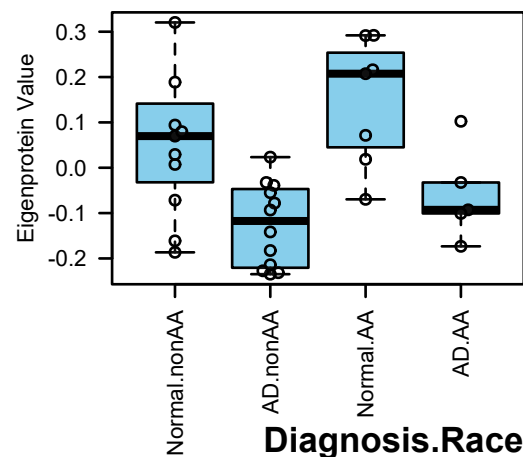

**MEskyblue.Plasma (Synthetic)**  
ANOVA p: 0.002

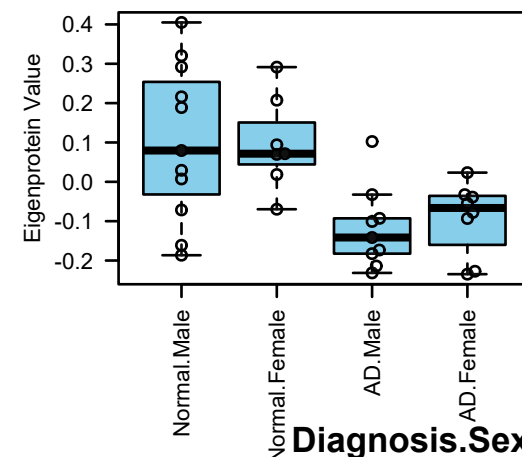

**bicor=0.57, p=0.00032**  
**cor=0.53, p=0.0011**

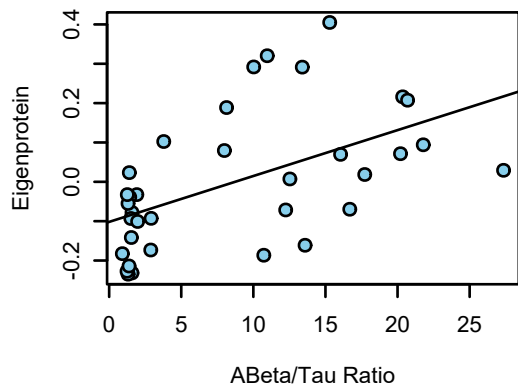

**bicor=0.54, p=0.0017**  
**cor=0.47, p=0.0076**

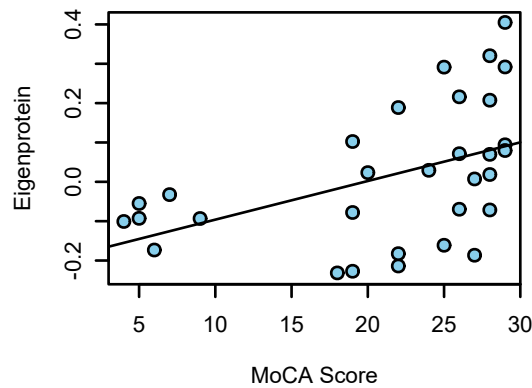

**bicor=-0.09, p=0.72**  
**cor=-0.13, p=0.61**

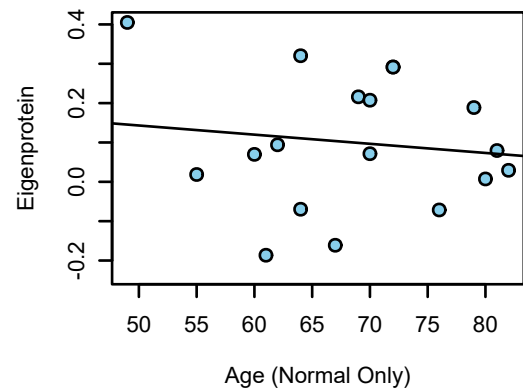

**bicor=-0.13, p=0.62**  
**cor=-0.11, p=0.67**

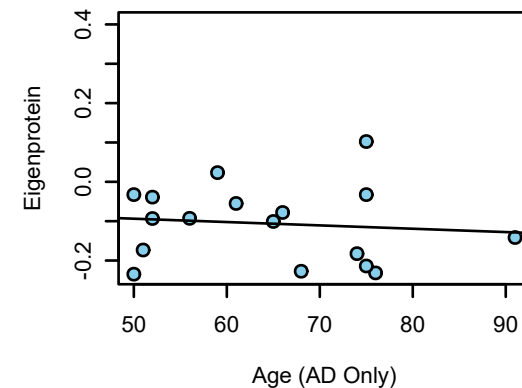

**M24 darkgrey.MEGATMT488**  
**Ubiquitination**



**MEdarkgrey.Plasma 35 Samp. (Synthetic)**  
**ANOVA p: 8.5e-05**

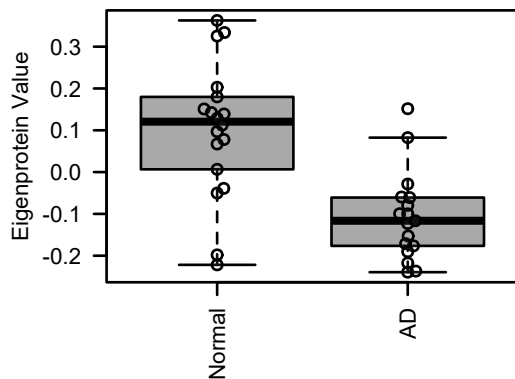

**MEdarkgrey.Plasma (Synthetic)**  
**ANOVA p: 0.00056**

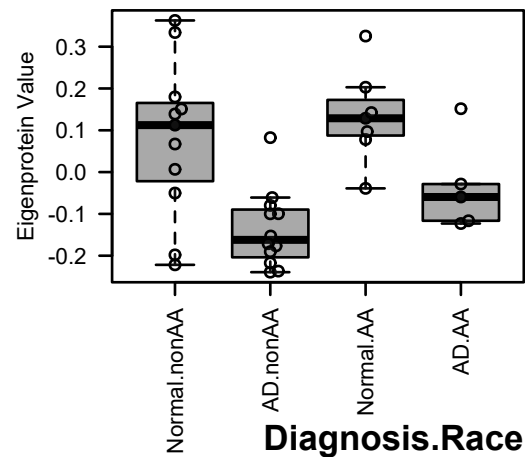

**MEdarkgrey.Plasma (Synthetic)**  
**ANOVA p: 0.0014**

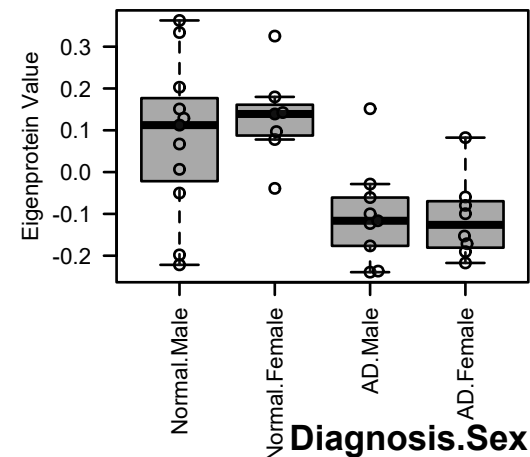

**bicor=0.61, p=9.5e-05**  
**cor=0.58, p=0.00026**

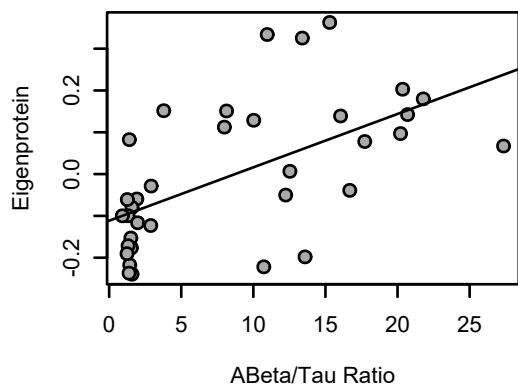

**bicor=0.52, p=0.0026**  
**cor=0.48, p=0.0063**

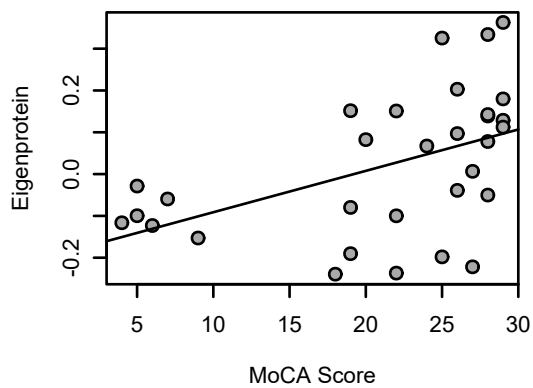

**bicor=-0.2, p=0.42**  
**cor=-0.17, p=0.5**

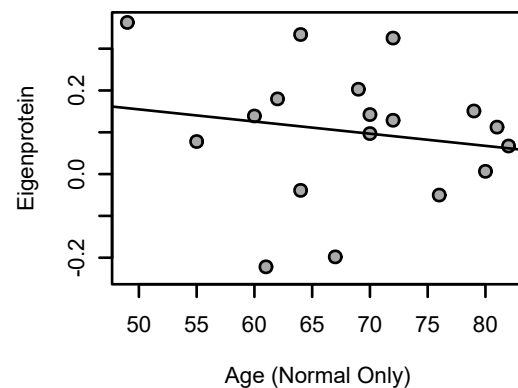

**bicor=-0.11, p=0.67**  
**cor=-0.051, p=0.85**

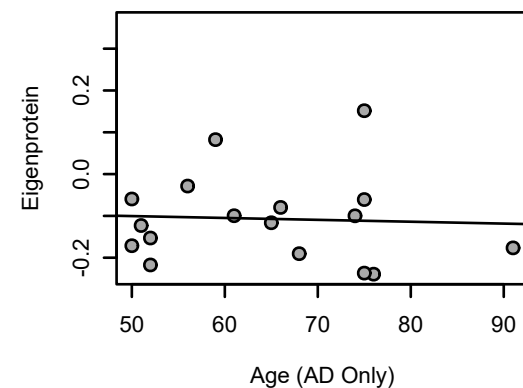

**M19 lightyellow.MEGATMT488**  
**Axonogenesis**



**MElightyellow.Plasma 35 Samp. (Synthetic)**  
**ANOVA p: 6.3e-05**

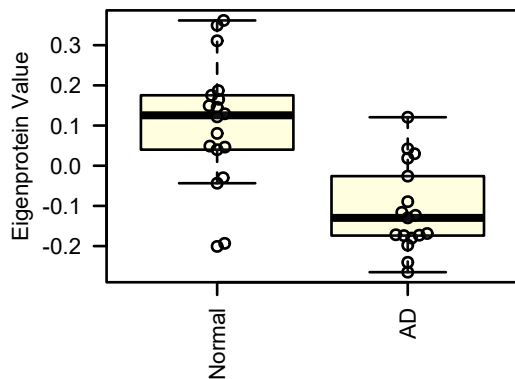

**MElightyellow.Plasma (Synthetic)**  
**ANOVA p: 0.00035**

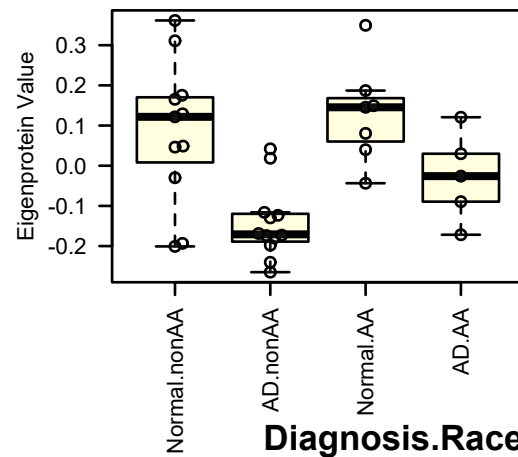

**MElightyellow.Plasma (Synthetic)**  
**ANOVA p: 0.001**

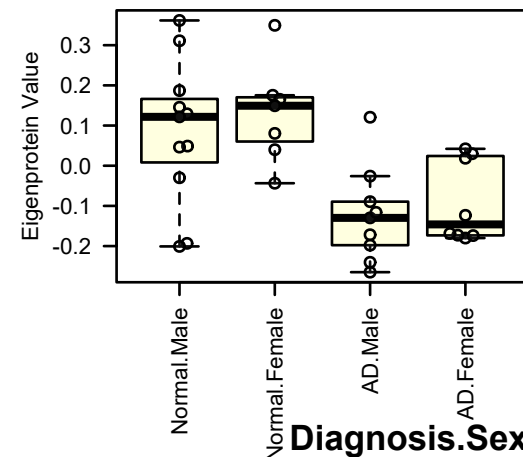

**bicor=0.57, p=0.00035**  
**cor=0.56, p=0.00047**

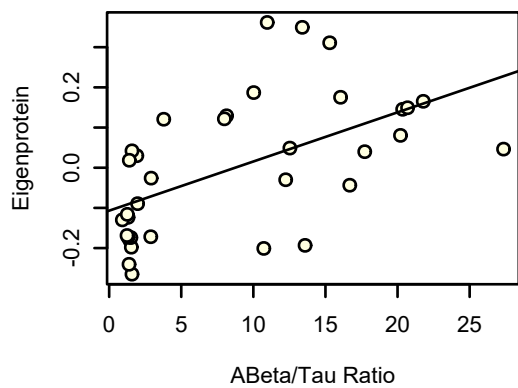

**bicor=0.57, p=0.00076**  
**cor=0.48, p=0.0063**

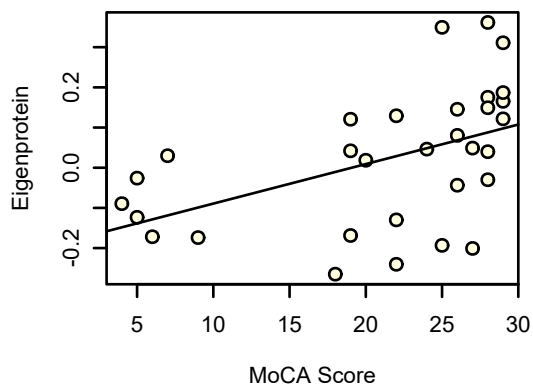

**bicor=-0.13, p=0.59**  
**cor=-0.11, p=0.66**

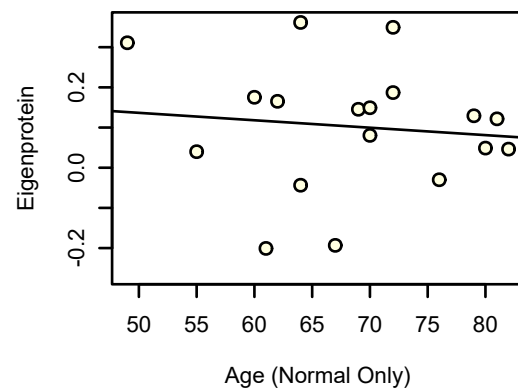

**bicor=-0.22, p=0.39**  
**cor=-0.16, p=0.54**

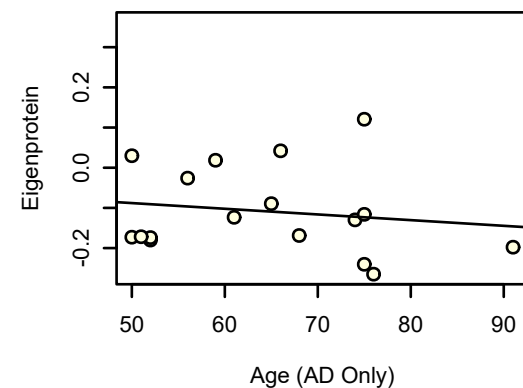

**M7 black.MEGATMT488**  
**MAPK/Metabolism**



**MEblack.Plasma 35 Samp. (Synthetic)**  
**ANOVA p: 1.9e-05**

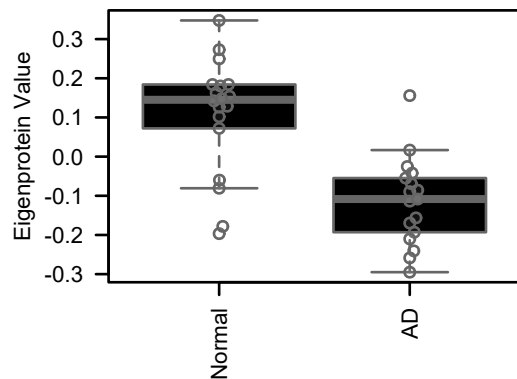

**MEblack.Plasma (Synthetic)**  
**ANOVA p: 4.7e-05**

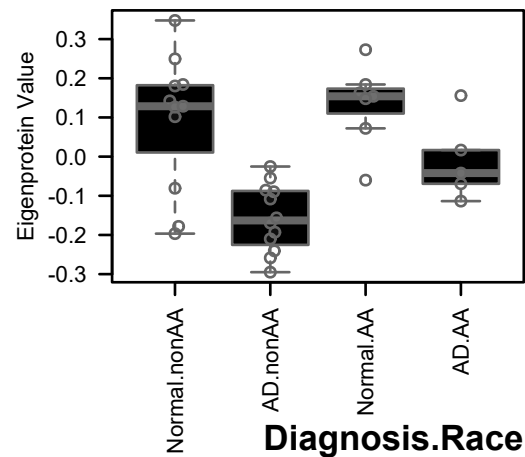

**MEblack.Plasma (Synthetic)**  
**ANOVA p: 0.00038**

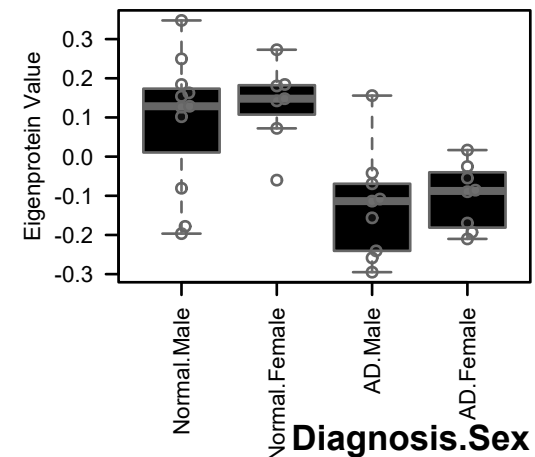

**bicor=0.64, p=3.4e-05**  
**cor=0.63, p=5e-05**

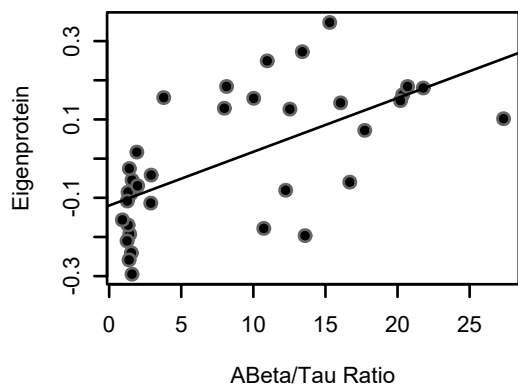

**bicor=0.54, p=0.0018**  
**cor=0.44, p=0.013**

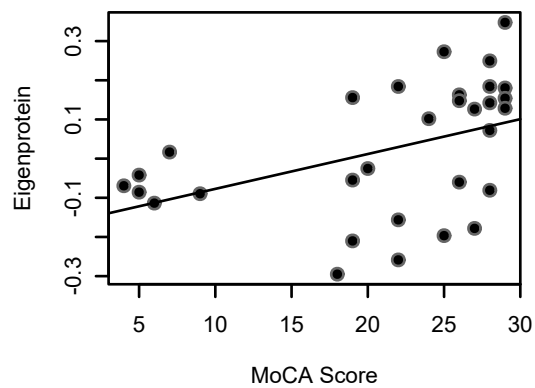

**bicor=-0.19, p=0.46**  
**cor=-0.066, p=0.79**

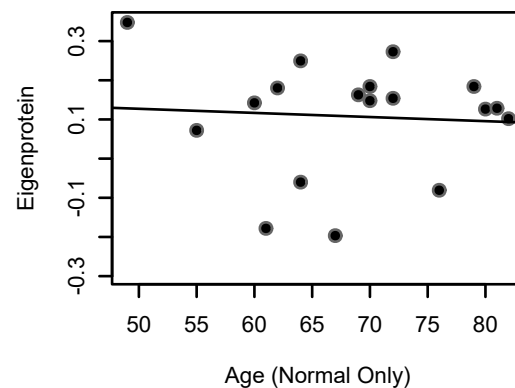

**bicor=-0.34, p=0.18**  
**cor=-0.29, p=0.26**

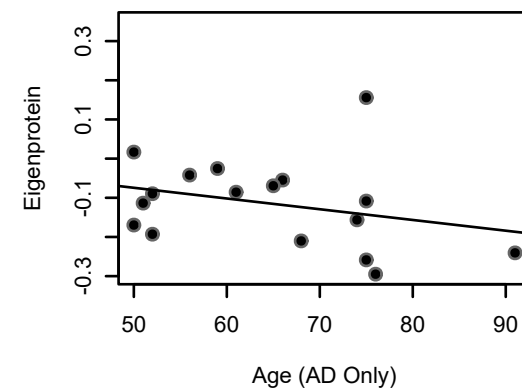

**M15 midnightblue.MEGATMT488**  
**Ambiguous**



**MEmidnightblue.Plasma 35 Samp. (Synthetic)**  
**ANOVA p: 0.00034**

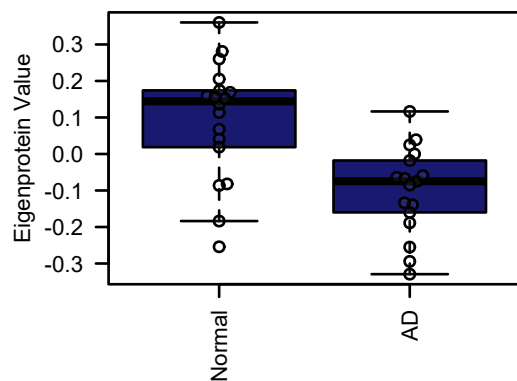

**MEMidnightblue.Plasma (Synthetic)**  
**ANOVA p: 0.00065**

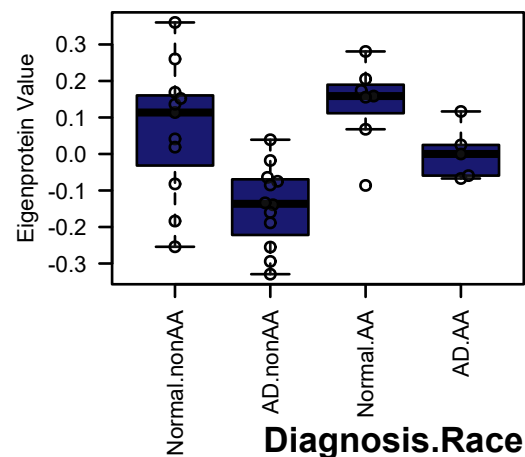

**MEMidnightblue.Plasma (Synthetic)**  
**ANOVA p: 0.0039**

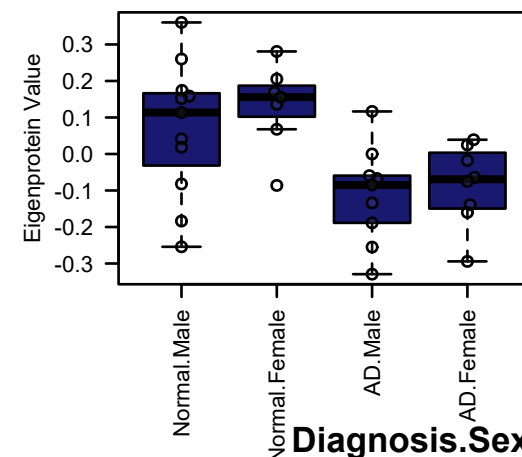

**bicor=0.56, p=5e-04**  
**cor=0.54, p=0.00081**

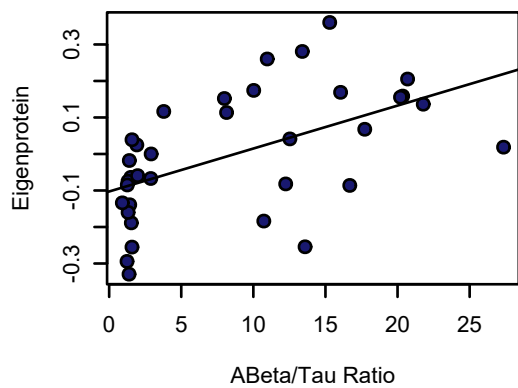

**bicor=0.52, p=0.0029**  
**cor=0.36, p=0.047**

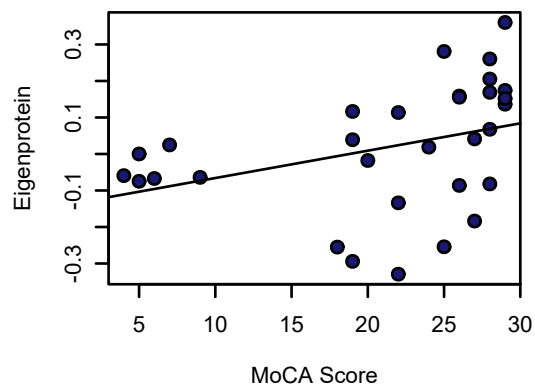

**bicor=-0.15, p=0.56**  
**cor=-0.15, p=0.55**

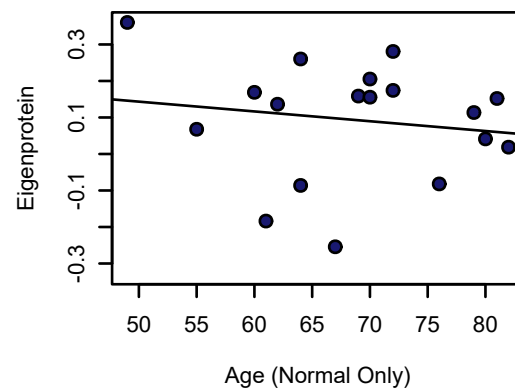

**bicor=-0.32, p=0.21**  
**cor=-0.33, p=0.2**

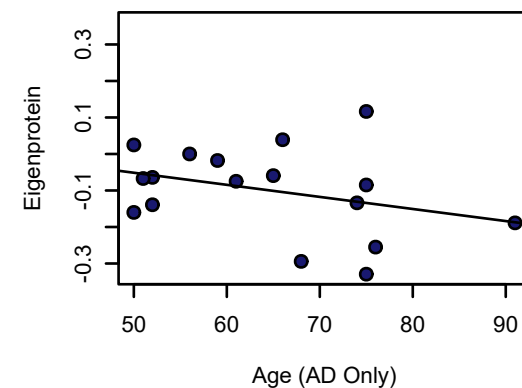

**M23 darkturquoise.MEGATMT488**  
**Ambiguous**



**MEdarkturquoise.Plasma 35 Samp. (Synthetic)**  
**ANOVA p: 0.00015**

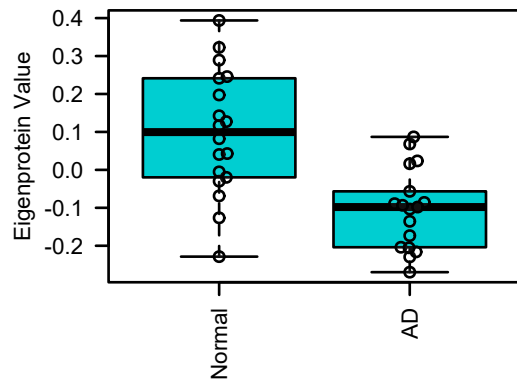

**MEdarkturquoise.Plasma (Synthetic)**  
**ANOVA p: 6e-04**

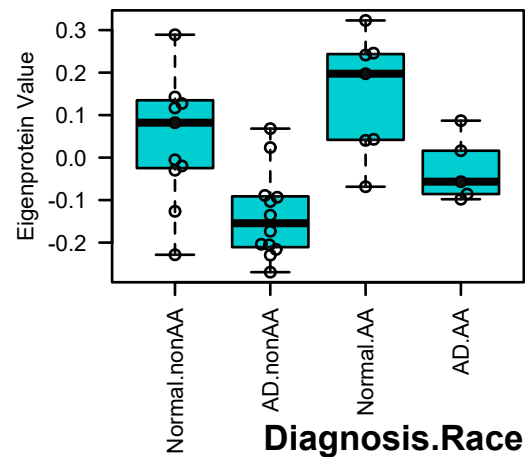

**MEdarkturquoise.Plasma (Synthetic)**  
**ANOVA p: 0.0028**

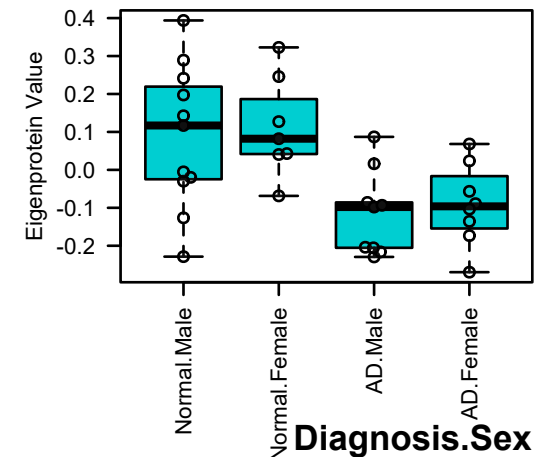

**bicor=0.57, p=0.00036**  
**cor=0.54, p=0.00081**

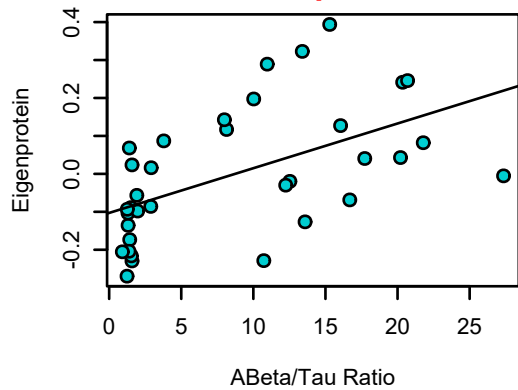

**bicor=0.52, p=0.0024**  
**cor=0.43, p=0.016**

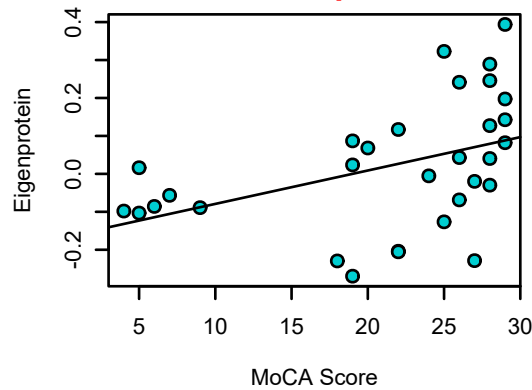

**bicor=-0.13, p=0.62**  
**cor=-0.16, p=0.53**

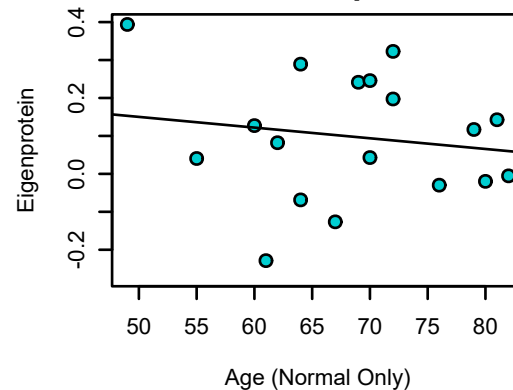

**bicor=-0.32, p=0.22**  
**cor=-0.32, p=0.21**

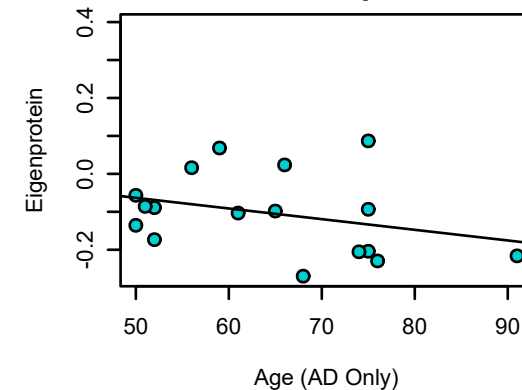

**M1 turquoise.MEGATMT488**  
**Synapse/Neuron**



**MEturquoise.Plasma 35 Samp. (Synthetic)**  
**ANOVA p: 2.3e-05**

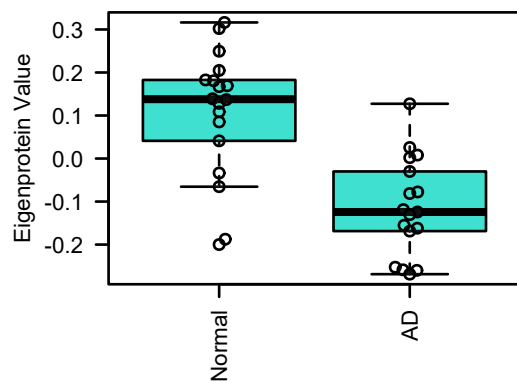

**MEturquoise.Plasma (Synthetic)**  
**ANOVA p: 7.7e-05**

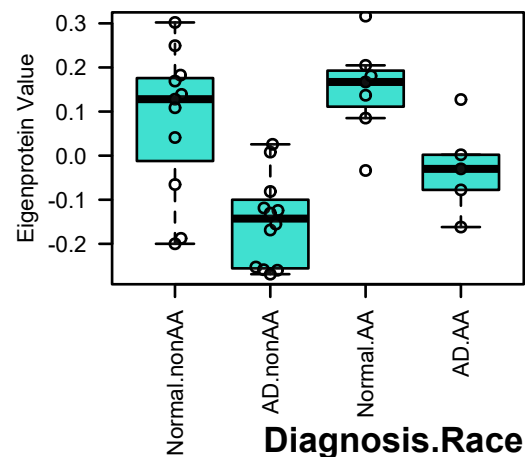

**MEturquoise.Plasma (Synthetic)**  
**ANOVA p: 0.00033**

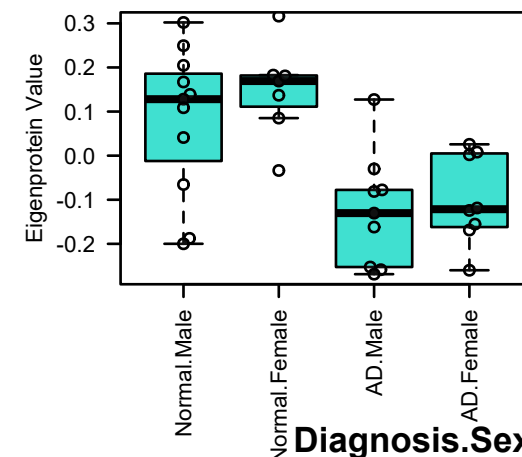

**bicor=0.65, p=2.5e-05**  
**cor=0.63, p=5e-05**

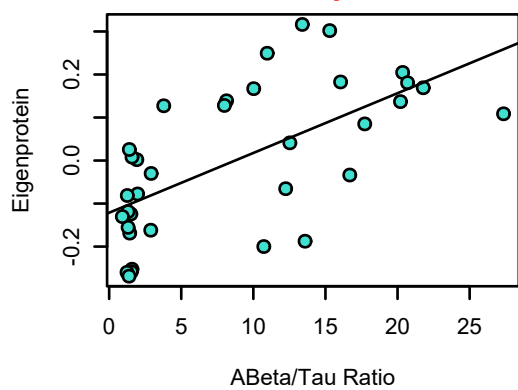

**bicor=0.56, p=0.0011**  
**cor=0.48, p=0.0063**

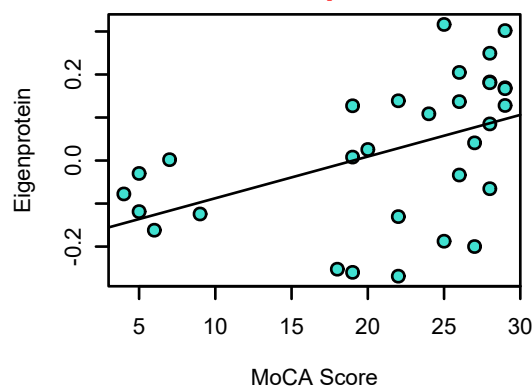

**bicor=-0.19, p=0.45**  
**cor=-0.091, p=0.72**

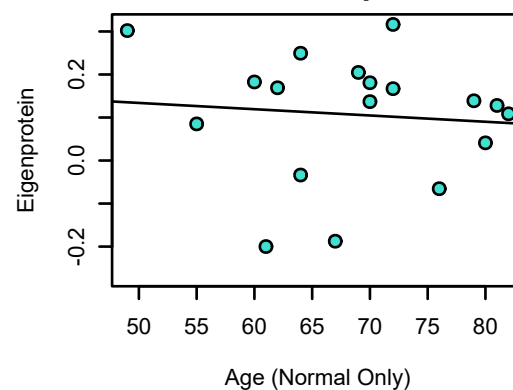

**bicor=-0.28, p=0.28**  
**cor=-0.26, p=0.31**

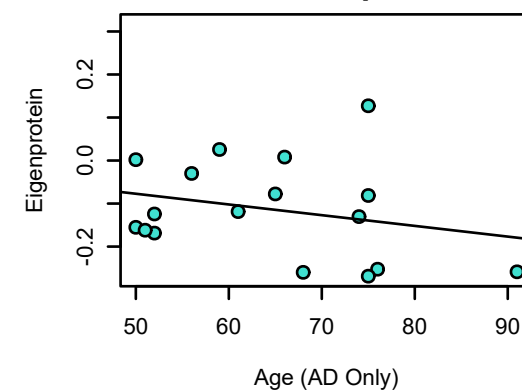

**M4 yellow.MEGATMT488**  
Synapse/Neuron



**MEyellow.Plasma 35 Samp. (Synthetic)**  
ANOVA p: 1.5e-05

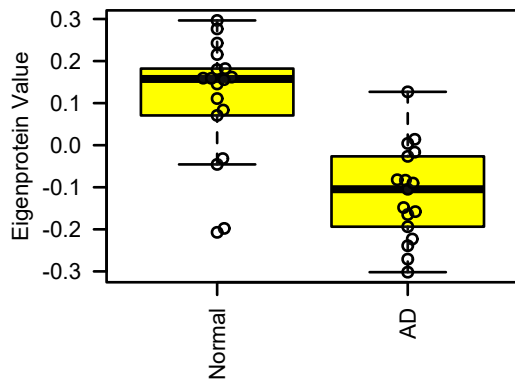

**MEyellow.Plasma (Synthetic)**  
ANOVA p: 4e-05

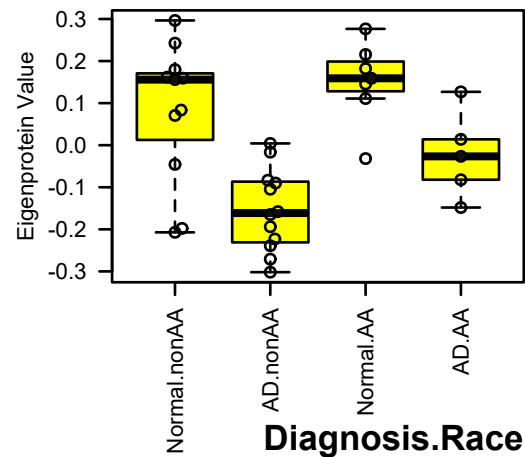

**MEyellow.Plasma (Synthetic)**  
ANOVA p: 0.00024

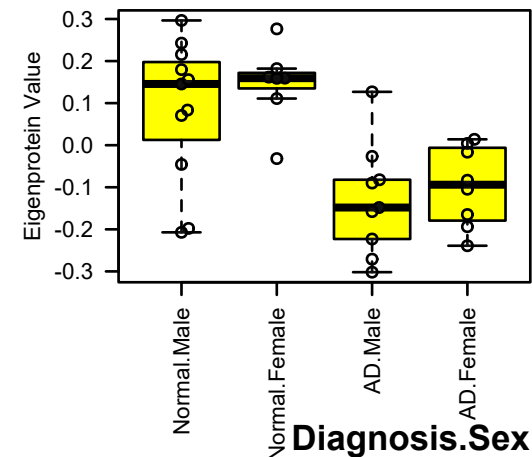

**bicor=0.65, p=2.5e-05**  
**cor=0.63, p=5e-05**

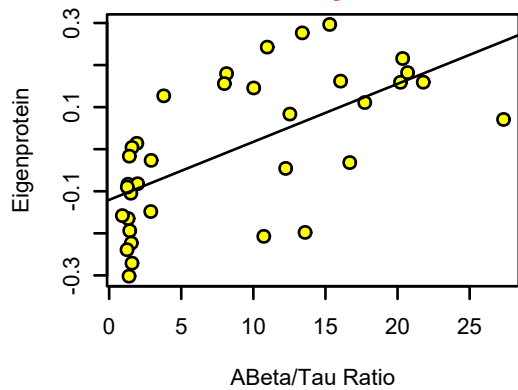

**bicor=0.54, p=0.0016**  
**cor=0.45, p=0.011**

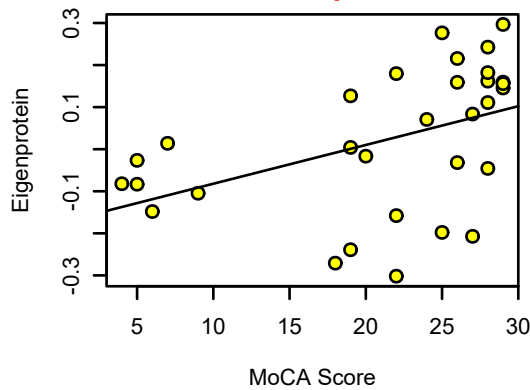

**bicor=-0.14, p=0.58**  
**cor=-0.057, p=0.82**

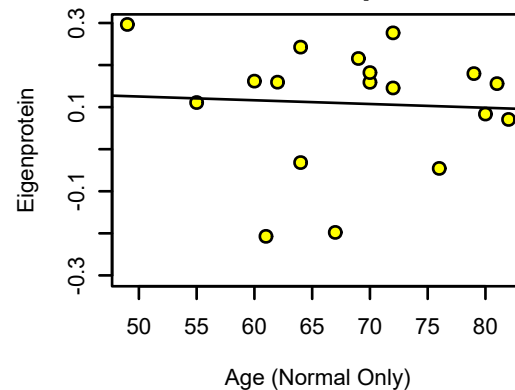

**bicor=-0.26, p=0.31**  
**cor=-0.26, p=0.31**

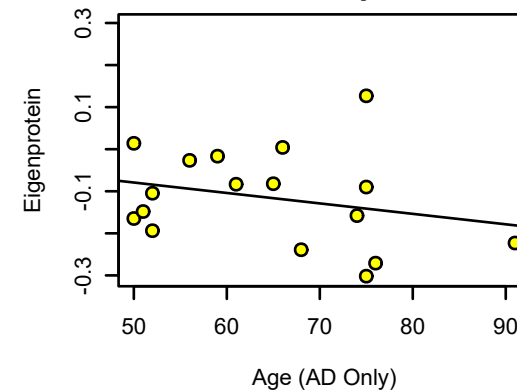

**M36 yellowgreen.MEGATMT488**  
Neurotransmitter Regulation

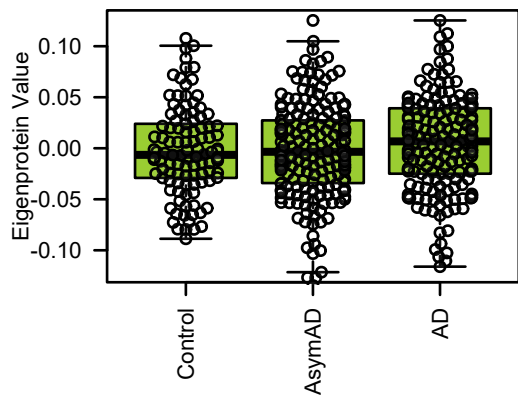

**MEyellowgreen.Plasma 35 Samp. (Synthetic)**  
ANOVA p: 0.004

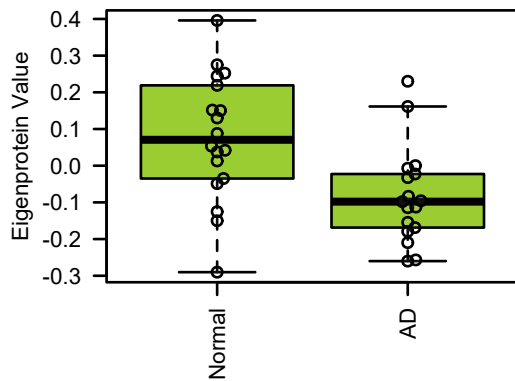

**MEyellowgreen.Plasma (Synthetic)**  
ANOVA p: 0.028

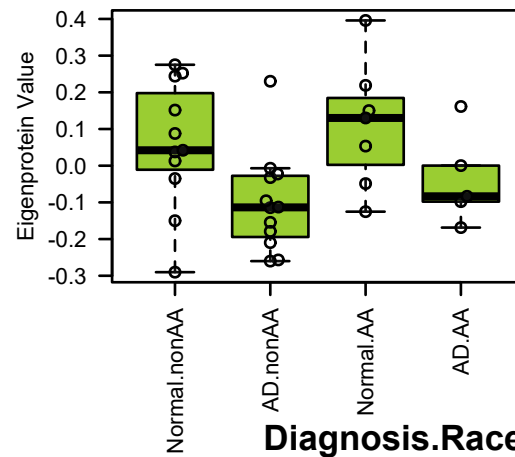

**MEyellowgreen.Plasma (Synthetic)**  
ANOVA p: 0.0053

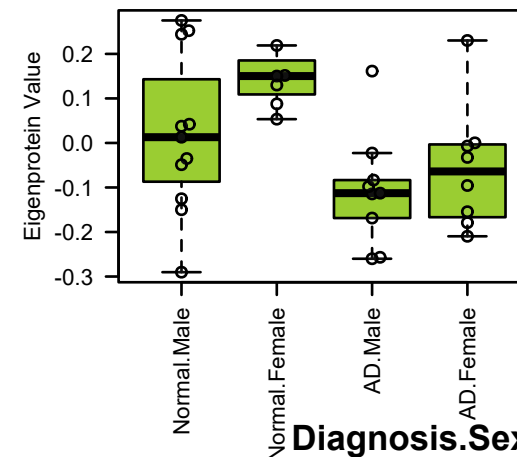

**bicor=0.57, p=0.00037**  
**cor=0.55, p=0.00062**

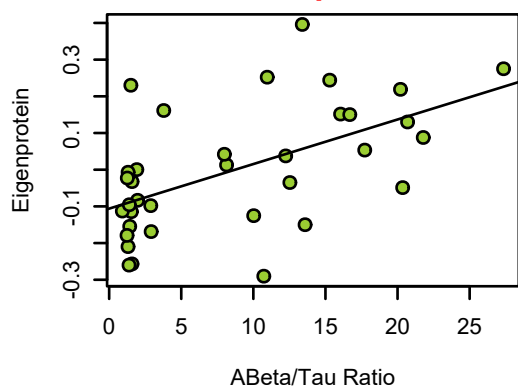

**bicor=0.32, p=0.08**  
**cor=0.33, p=0.07**

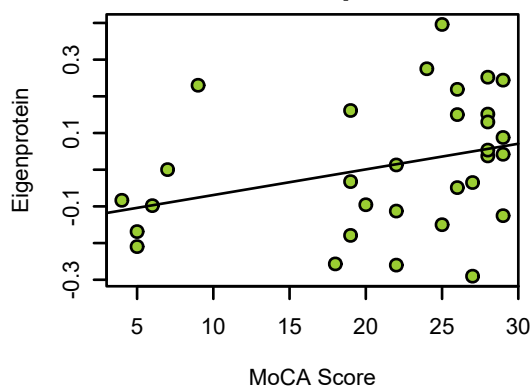

**bicor=-0.068, p=0.79**  
**cor=-0.039, p=0.88**

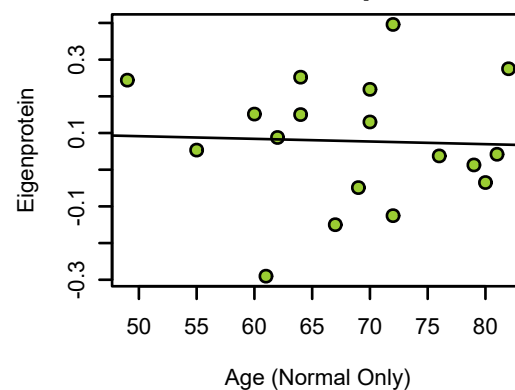

**bicor=-0.24, p=0.36**  
**cor=-0.23, p=0.37**

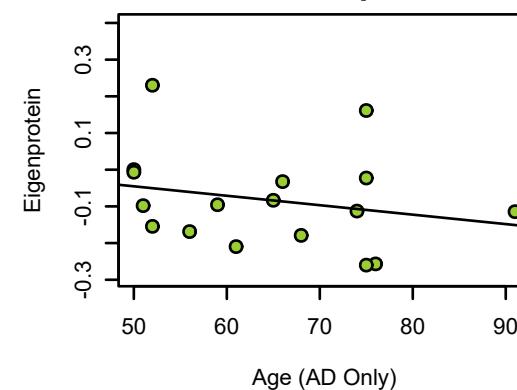

**M2 blue.MEGATMT488  
Mitochondria**



**MEblue.Plasma 35 Samp. (Synthetic)  
ANOVA p: 1.9e-05**

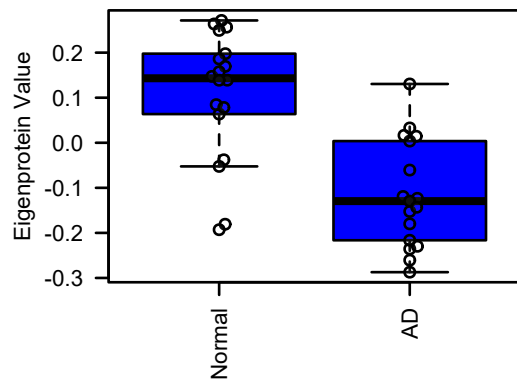

**MEblue.Plasma (Synthetic)  
ANOVA p: 2.3e-05**

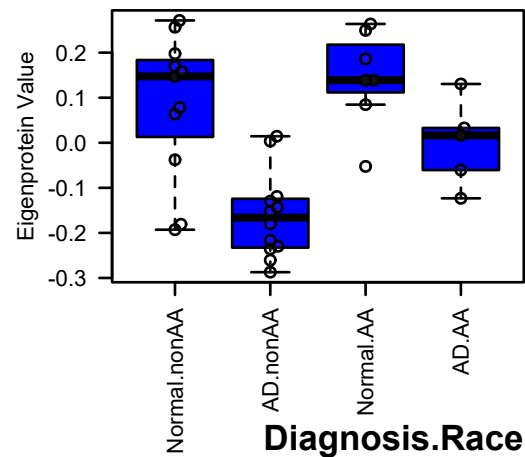

**MEblue.Plasma (Synthetic)  
ANOVA p: 0.00042**

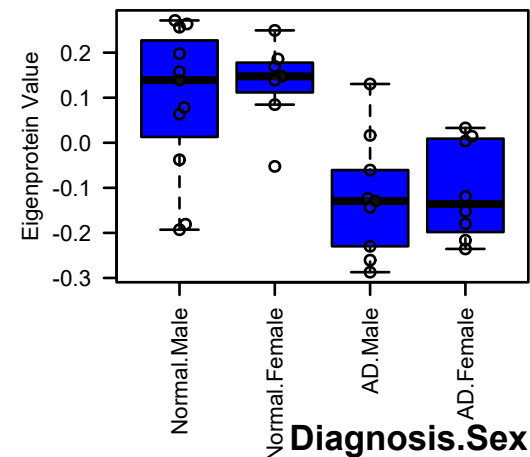

**bicor=0.63, p=4.5e-05  
cor=0.63, p=5e-05**

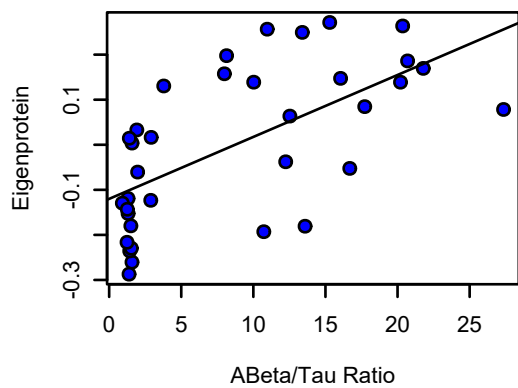

**bicor=0.56, p=0.0012  
cor=0.45, p=0.011**

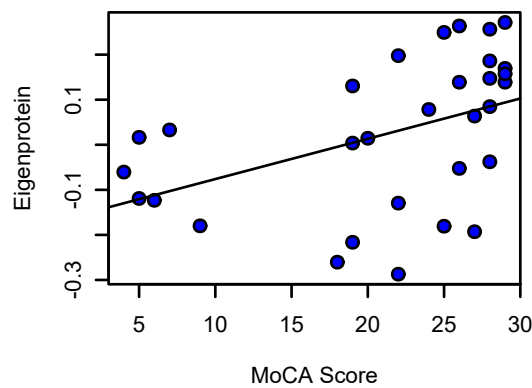

**bicor=-0.056, p=0.83  
cor=-0.021, p=0.93**

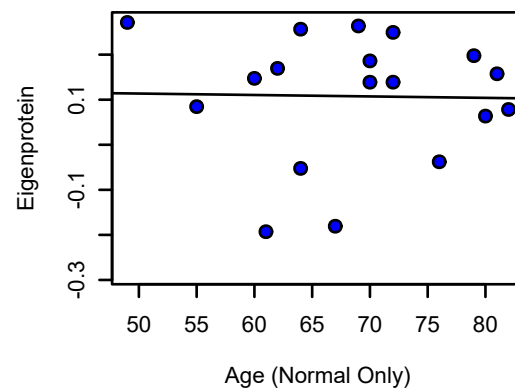

**bicor=-0.26, p=0.32  
cor=-0.24, p=0.35**

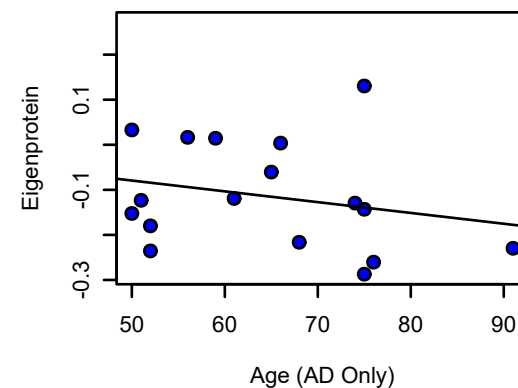

**M31 paleturquoise.MEGATMT488  
Axon Node/Ion Channel**

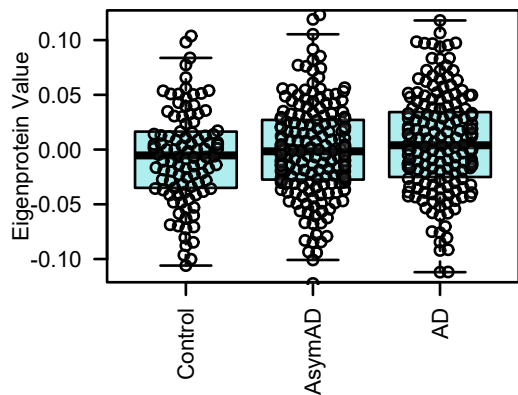

**MEpaleturquoise.Plasma 35 Samp. (Synthet)  
ANOVA p: 0.0012**

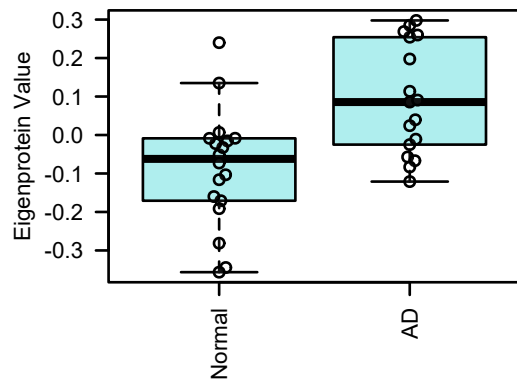

**MEpaleturquoise.Plasma (Synthetic)  
ANOVA p: 0.0033**

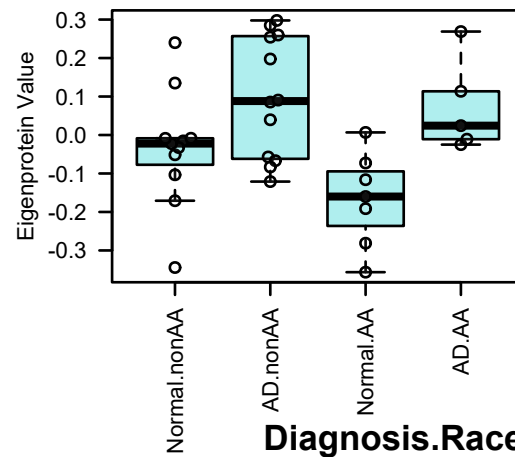

**MEpaleturquoise.Plasma (Synthetic)  
ANOVA p: 0.00085**

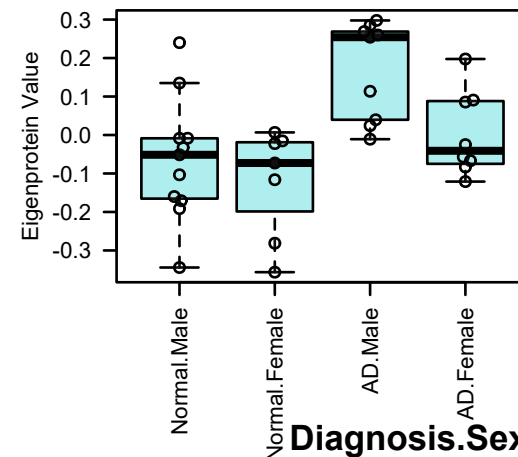

**bicor=-0.46, p=0.0051  
cor=-0.45, p=0.0067**

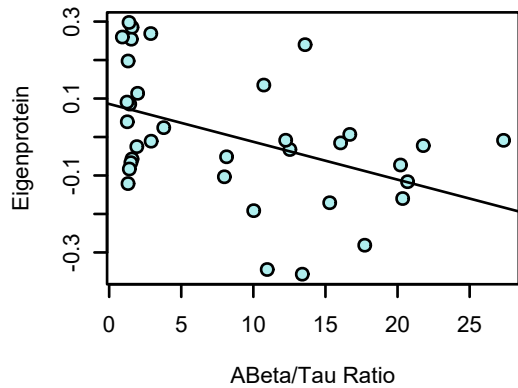

**bicor=-0.44, p=0.014  
cor=-0.31, p=0.09**

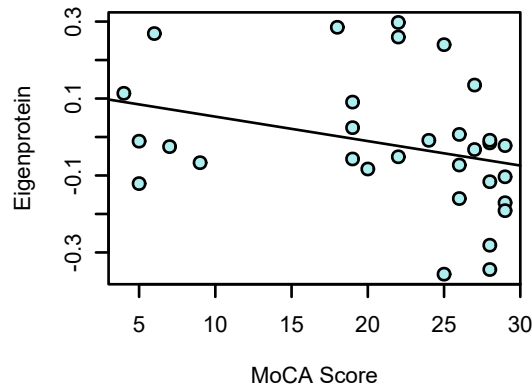

**bicor=0.15, p=0.56  
cor=0.12, p=0.64**

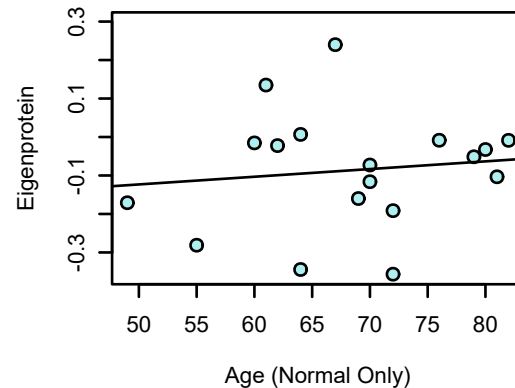

**bicor=0.4, p=0.11  
cor=0.41, p=0.1**

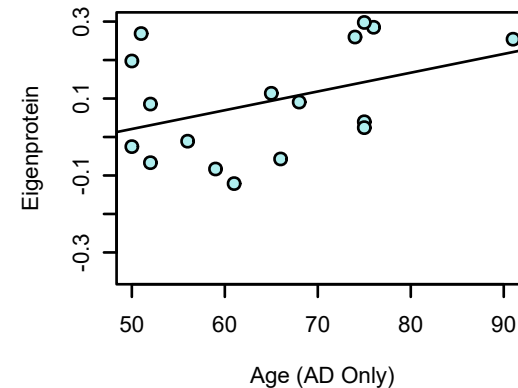

**M33 darkolivegreen.MEGATMT488**  
Ambiguous



**MEdarkolivegreen.Plasma 35 Samp. (Synthet**  
ANOVA p: 0.00012

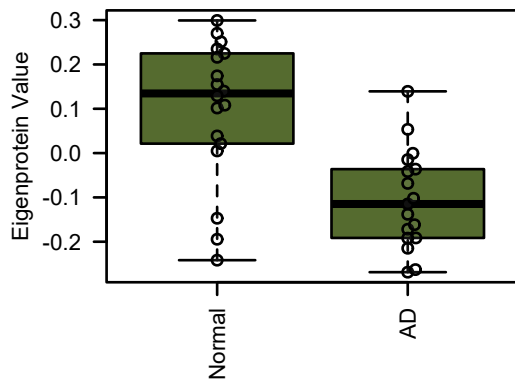

**MEdarkolivegreen.Plasma (Synthetic)**  
ANOVA p: 0.0024

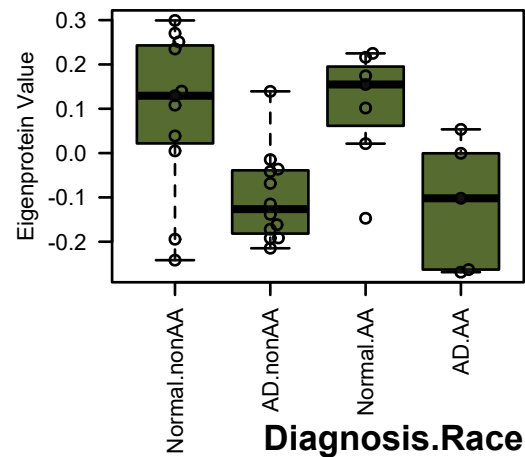

**MEdarkolivegreen.Plasma (Synthetic)**  
ANOVA p: 0.002

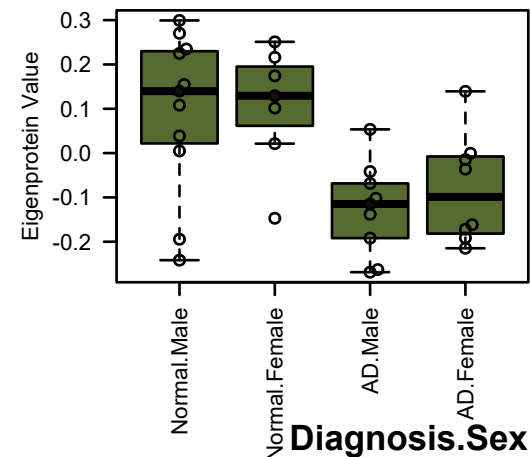

**bicor=0.61, p=9.4e-05**  
**cor=0.61, p=1e-04**

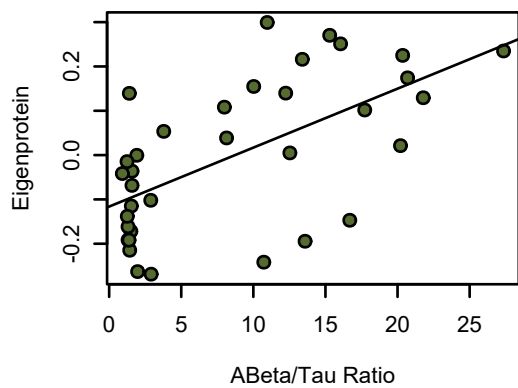

**bicor=0.52, p=0.0026**  
**cor=0.62, p=2e-04**

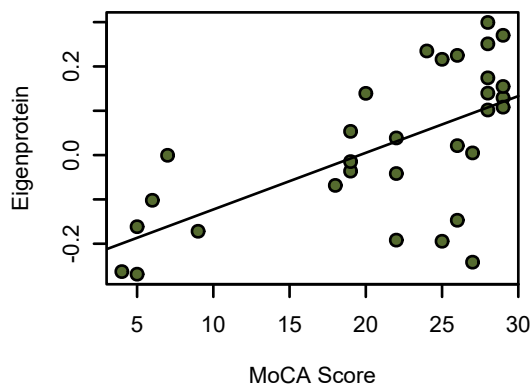

**bicor=-0.034, p=0.89**  
**cor=-0.018, p=0.94**

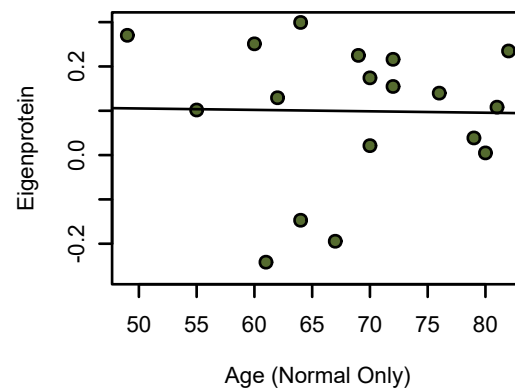

**bicor=0.2, p=0.44**  
**cor=0.17, p=0.51**

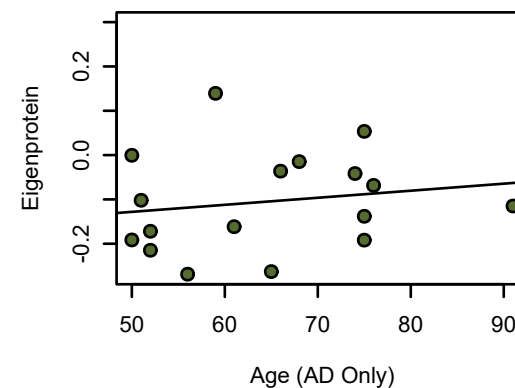

**M32 violet.MEGATMT488**  
Ambiguous

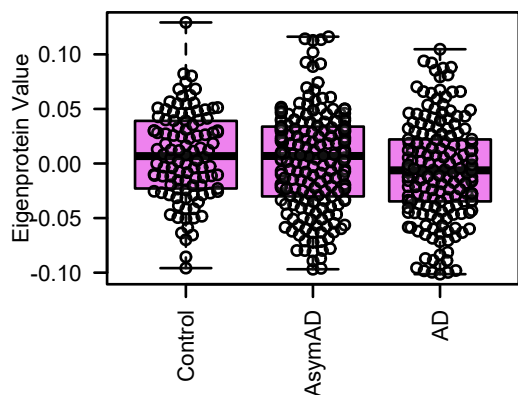

**MEviolet.Plasma 35 Samp. (Synthetic)**  
ANOVA p: 8e-04

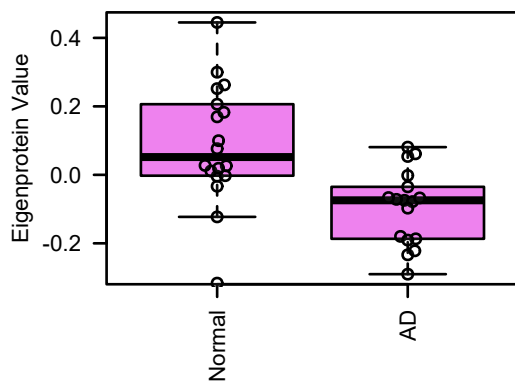

**MEviolet.Plasma (Synthetic)**  
ANOVA p: 0.0015

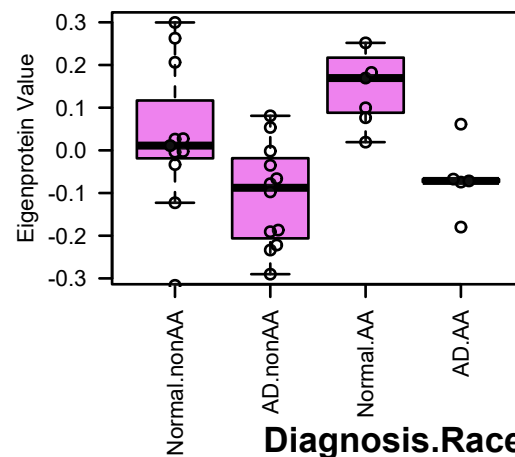

**MEviolet.Plasma (Synthetic)**  
ANOVA p: 0.0032

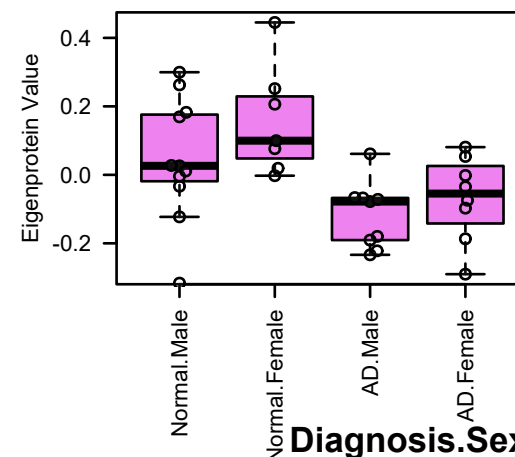

**bicor=0.58, p=0.00029**  
**cor=0.54, p=0.00081**

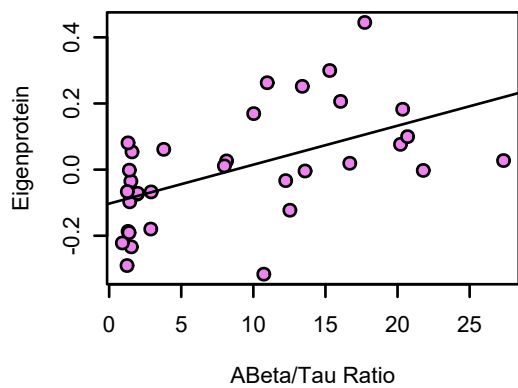

**bicor=0.47, p=0.0082**  
**cor=0.37, p=0.04**

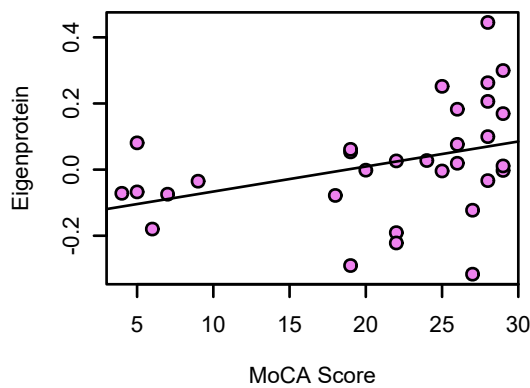

**bicor=-0.43, p=0.072**  
**cor=-0.42, p=0.083**

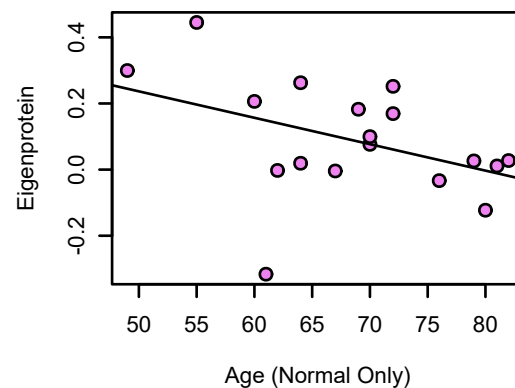

**bicor=-0.17, p=0.52**  
**cor=-0.2, p=0.44**

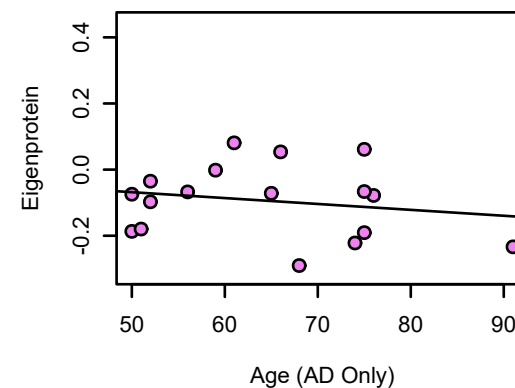



**M3 brown.MEGATMT488**  
**Oligo/Myelination**

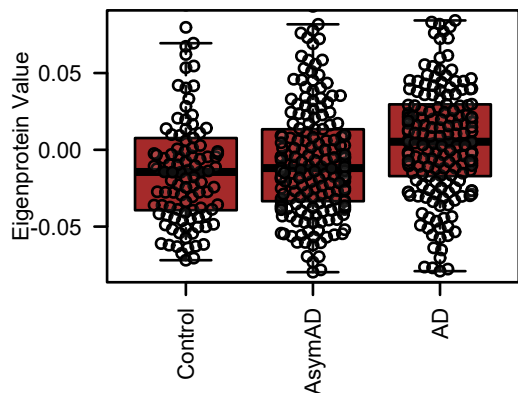

**MEbrown.Plasma 35 Samp. (Synthetic)**  
**ANOVA p: 6.1e-05**

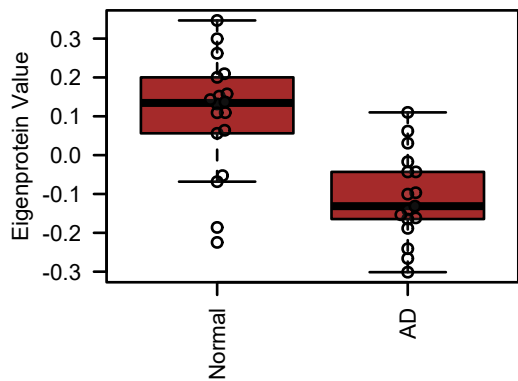

**MEbrown.Plasma (Synthetic)**  
**ANOVA p: 0.00015**

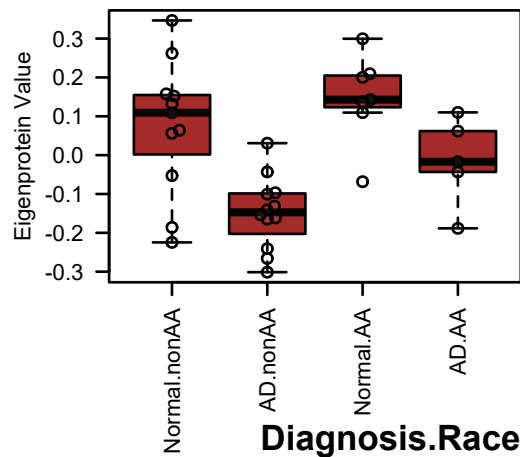

**MEbrown.Plasma (Synthetic)**  
**ANOVA p: 0.00086**

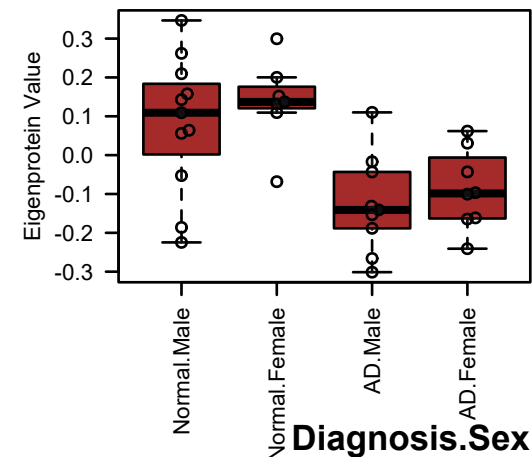

**bicor=0.62, p=6.9e-05**  
**cor=0.6, p=0.00014**

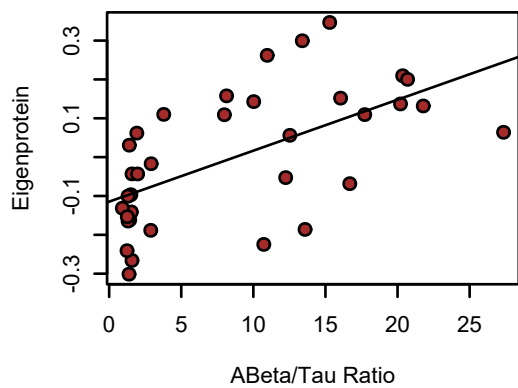

**bicor=0.57, p=0.00077**  
**cor=0.42, p=0.019**

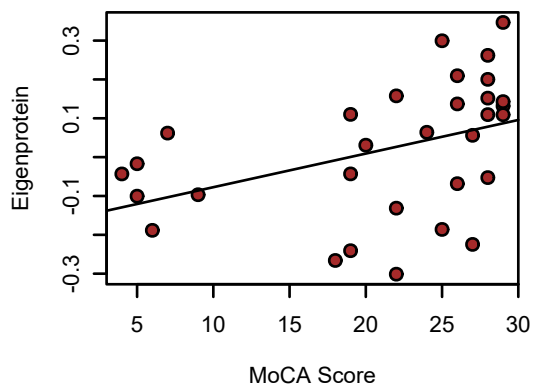

**bicor=-0.17, p=0.5**  
**cor=-0.12, p=0.64**

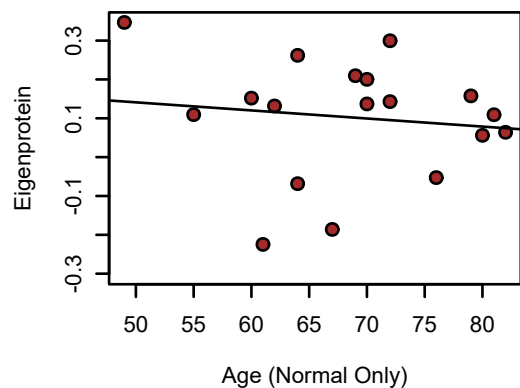

**bicor=-0.26, p=0.32**  
**cor=-0.23, p=0.37**

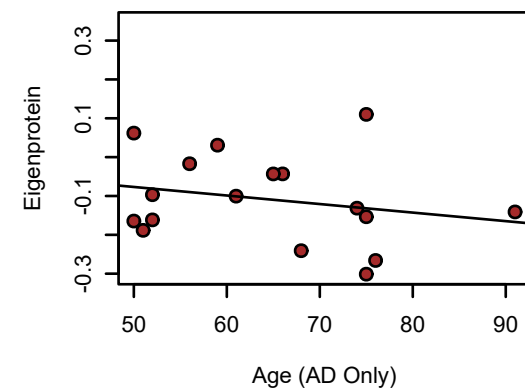

**M34 darkmagenta.MEGATMT488**  
**Ambiguous**

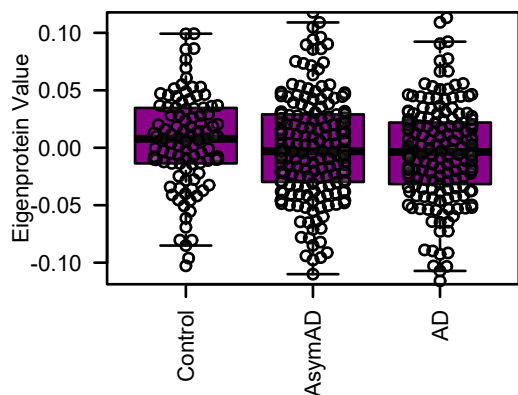

**MEdarkmagenta.Plasma 35 Samp. (Synthetic)**  
**ANOVA p: 6.2e-06**

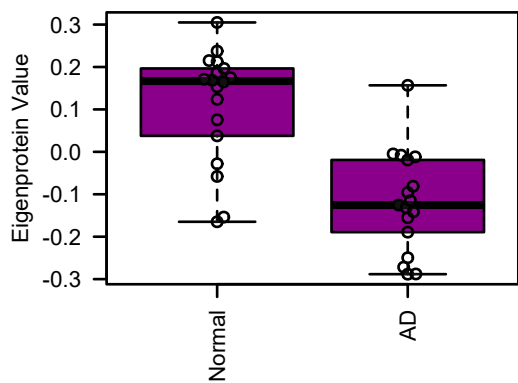

**MEdarkmagenta.Plasma (Synthetic)**  
**ANOVA p: 1.3e-05**

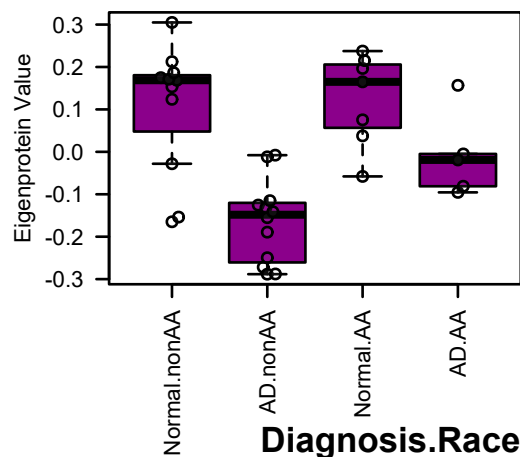

**MEdarkmagenta.Plasma (Synthetic)**  
**ANOVA p: 0.00017**

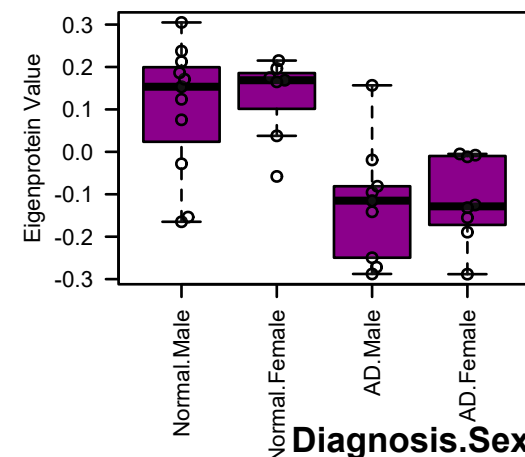

**bicor=0.7, p=2.7e-06**  
**cor=0.69, p=4.5e-06**

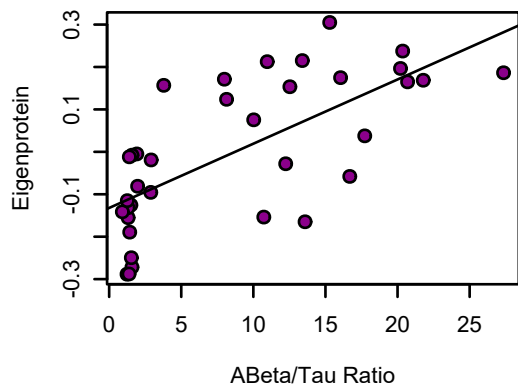

**bicor=0.52, p=0.0029**  
**cor=0.47, p=0.0076**

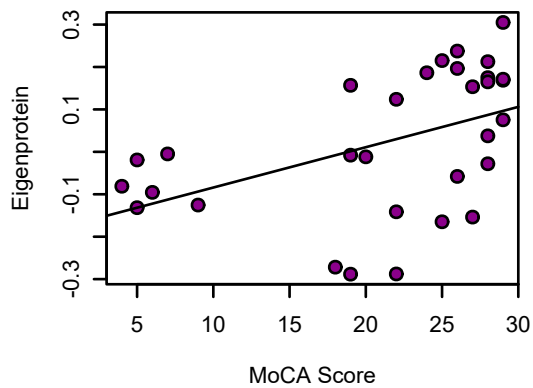

**bicor=-0.069, p=0.79**  
**cor=0.041, p=0.87**

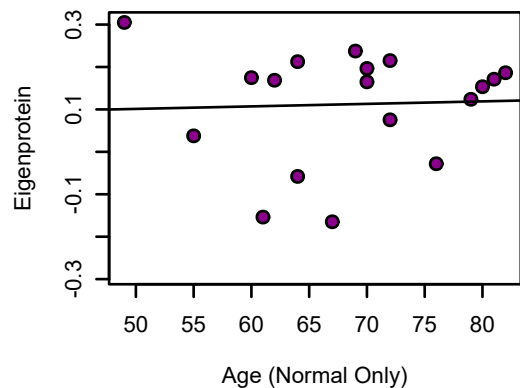

**bicor=-0.31, p=0.23**  
**cor=-0.29, p=0.26**

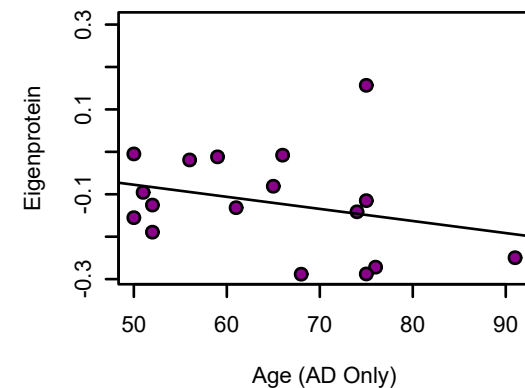

**M8 pink.MEGATMT488**  
**Protein Transport**

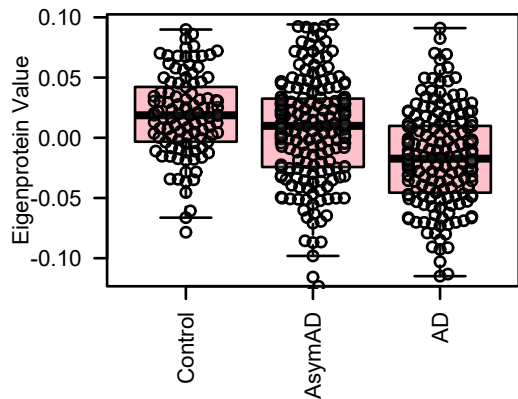

**MEpink.Plasma 35 Samp. (Synthetic)**  
**ANOVA p: 3.2e-05**

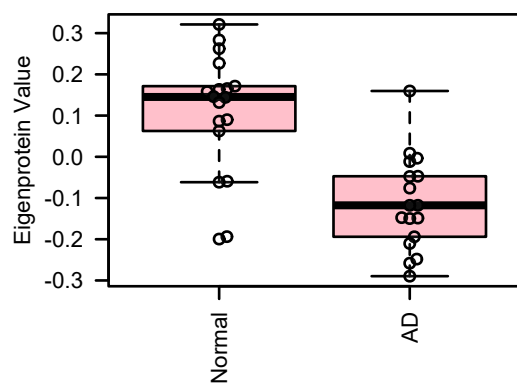

**MEpink.Plasma (Synthetic)**  
**ANOVA p: 9.9e-05**

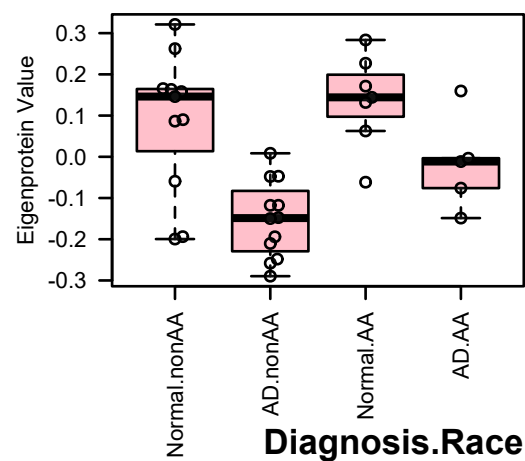

**MEpink.Plasma (Synthetic)**  
**ANOVA p: 0.00064**

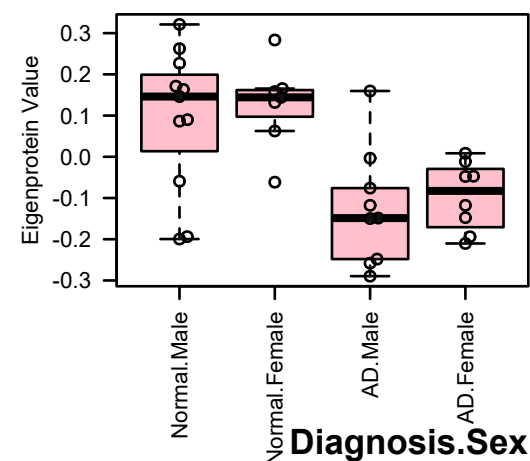

**bicor=0.63, p=5.7e-05**  
**cor=0.61, p=1e-04**

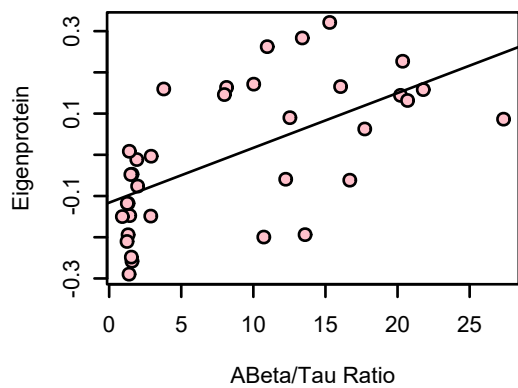

**bicor=0.51, p=0.0037**  
**cor=0.44, p=0.013**

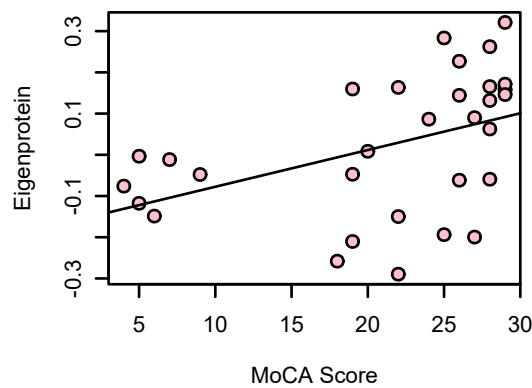

**bicor=-0.089, p=0.73**  
**cor=-0.053, p=0.83**

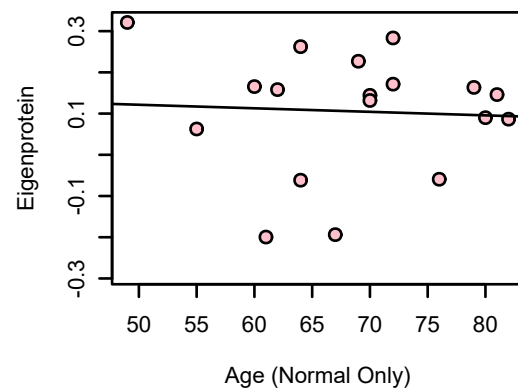

**bicor=-0.35, p=0.17**  
**cor=-0.3, p=0.24**

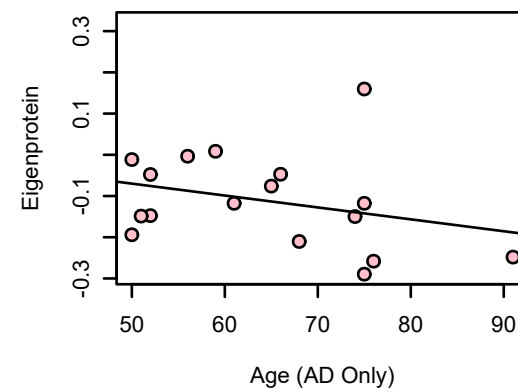

**M37 skyblue3.MEGATMT488**  
**Endosome**

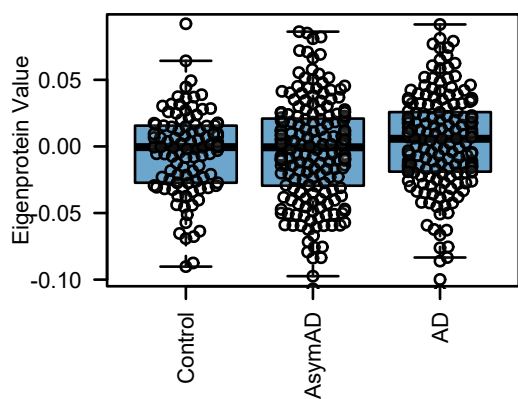

**MEskyblue3.Plasma 35 Samp. (Synthetic)**  
**ANOVA p: 1.3e-05**

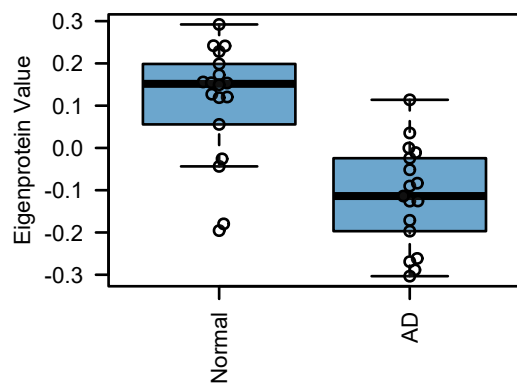

**MEskyblue3.Plasma (Synthetic)**  
**ANOVA p: 8.6e-06**

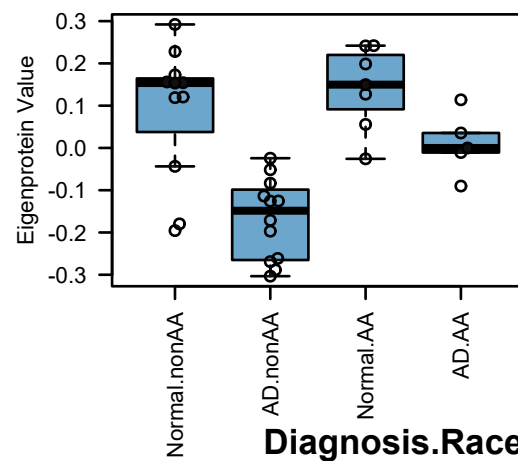

**MEskyblue3.Plasma (Synthetic)**  
**ANOVA p: 0.00028**

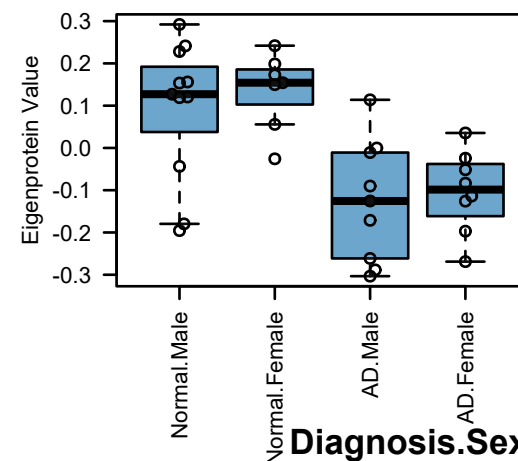

**bicor=0.67, p=1.2e-05**  
**cor=0.65, p=2.4e-05**

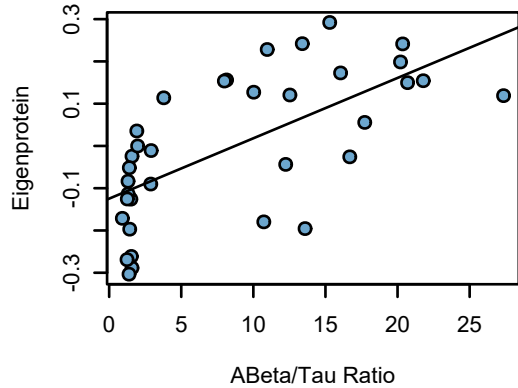

**bicor=0.58, p=0.00071**  
**cor=0.4, p=0.026**

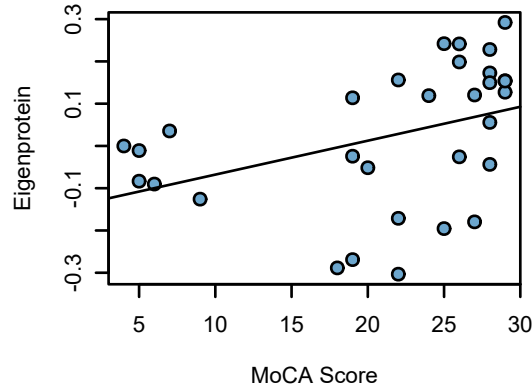

**bicor=-0.054, p=0.83**  
**cor=-0.0015, p=1**

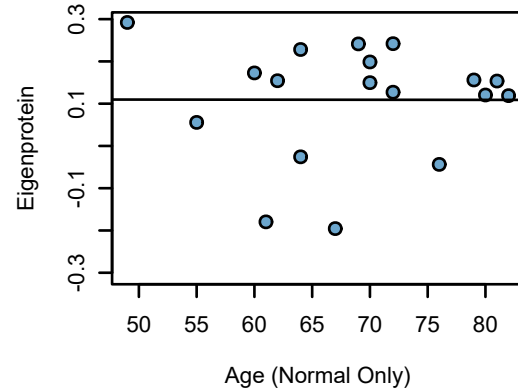

**bicor=-0.4, p=0.11**  
**cor=-0.39, p=0.12**

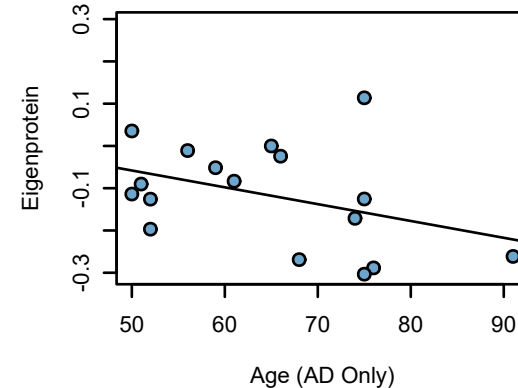

**M30 steelblue.MEGATMT488  
Proteasome**

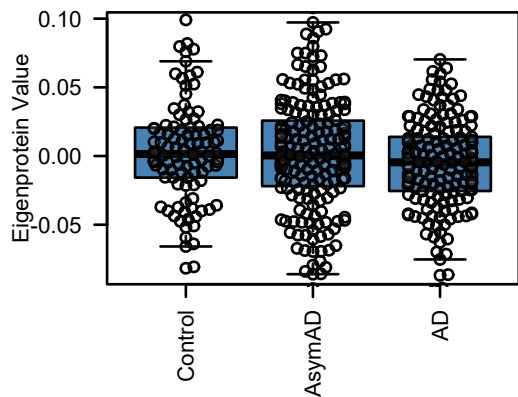

**MEsteelblue.Plasma 35 Samp. (Synthetic)  
ANOVA p: 2.7e-05**

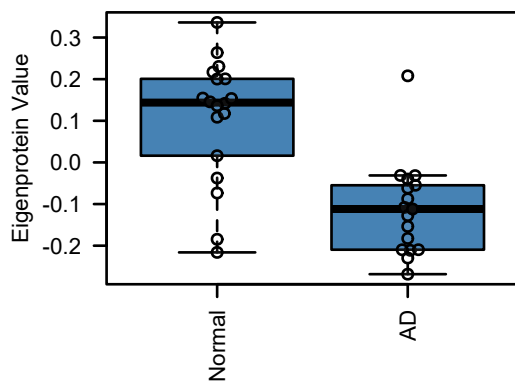

**MEsteelblue.Plasma (Synthetic)  
ANOVA p: 1e-04**

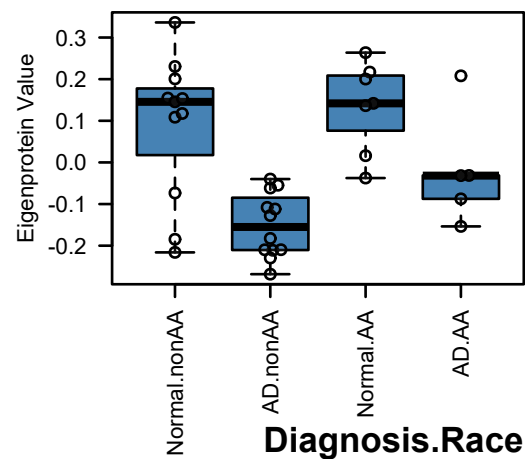

**MEsteelblue.Plasma (Synthetic)  
ANOVA p: 0.00056**

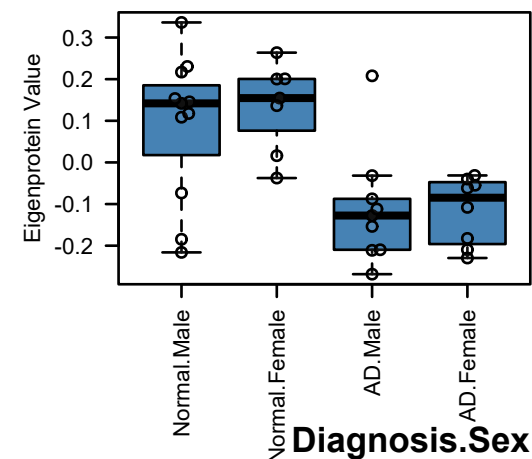

**bicor=0.65, p=2.4e-05  
cor=0.64, p=3.5e-05**

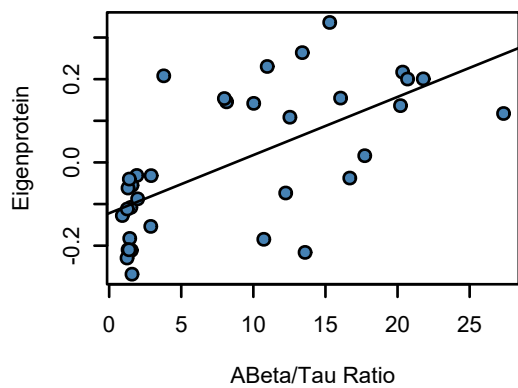

**bicor=0.45, p=0.011  
cor=0.47, p=0.0076**

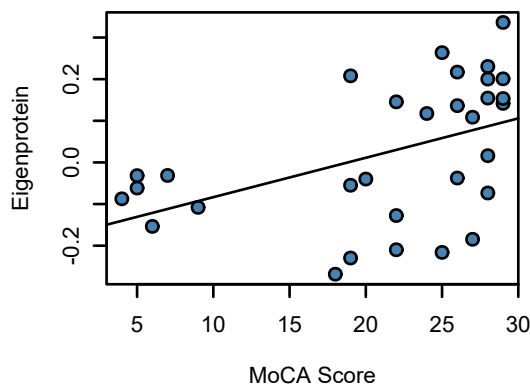

**bicor=-0.061, p=0.81  
cor=-0.034, p=0.89**

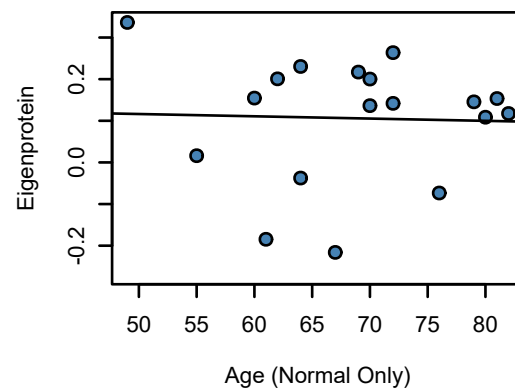

**bicor=-0.18, p=0.49  
cor=-0.1, p=0.7**

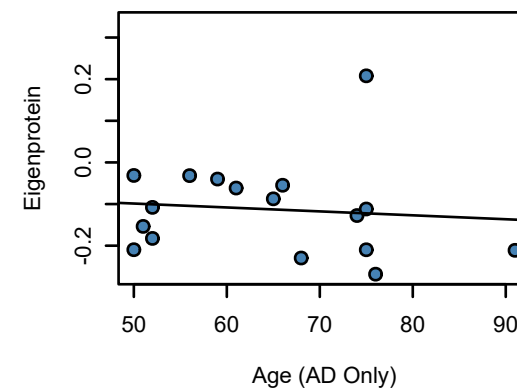

**M38 plum1.MEGATMT488  
Heat Shock/Folding**

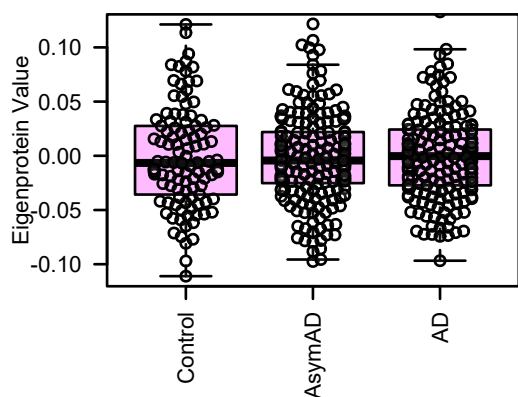

**MEplum1.Plasma 35 Samp. (Synthetic)  
ANOVA p: 1.6e-05**

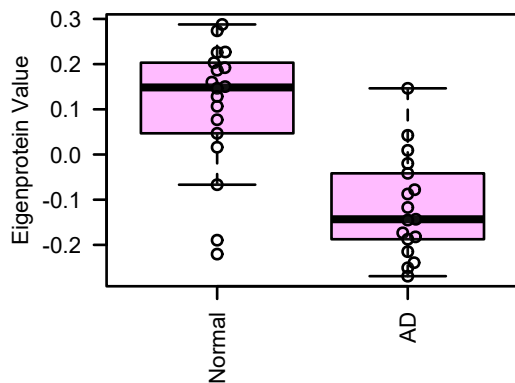

**MEplum1.Plasma (Synthetic)  
ANOVA p: 3.9e-05**

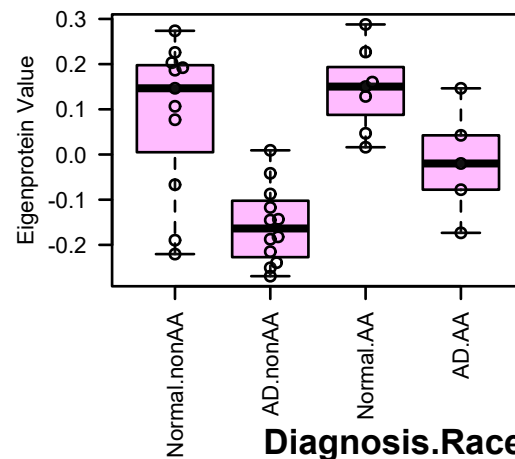

**MEplum1.Plasma (Synthetic)  
ANOVA p: 0.00018**

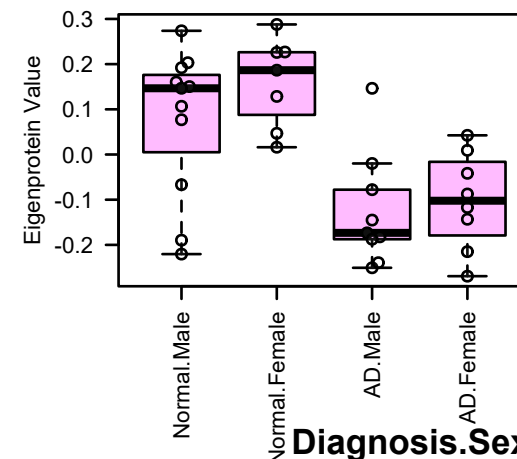

**bicor=0.65, p=2.8e-05  
cor=0.64, p=3.5e-05**

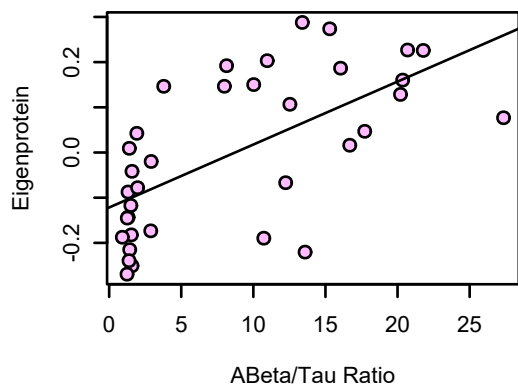

**bicor=0.58, p=0.00064  
cor=0.45, p=0.011**

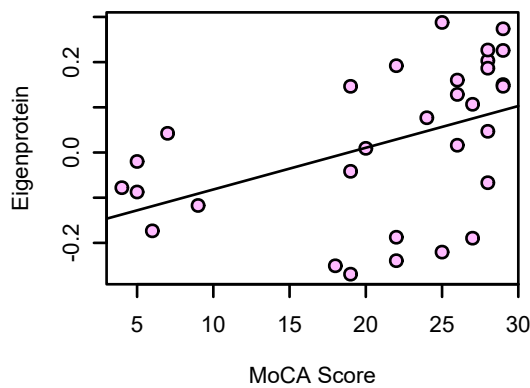

**bicor=-0.055, p=0.83  
cor=-0.022, p=0.93**

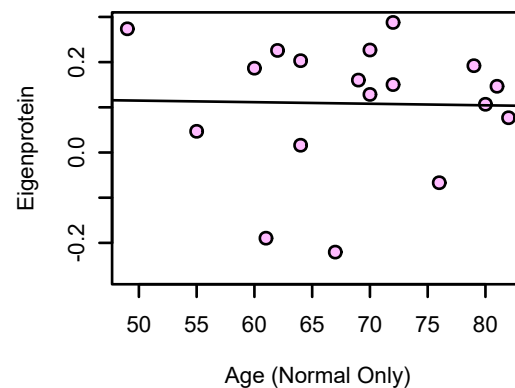

**bicor=-0.29, p=0.26  
cor=-0.22, p=0.4**

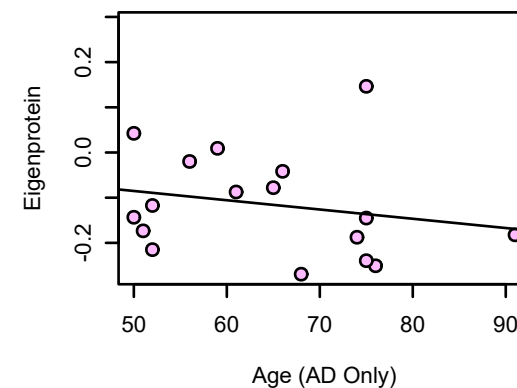

**M39 orangered4.MEGATMT488**  
Translation Initiation

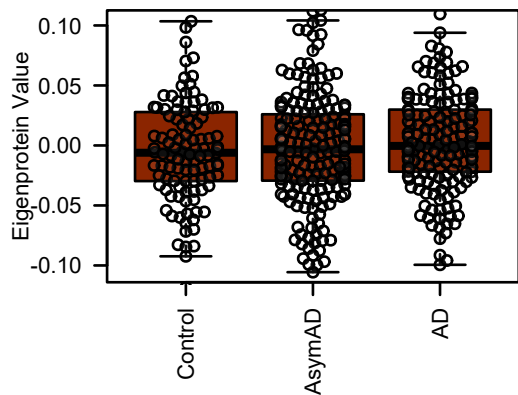

**MEorangered4.Plasma 35 Samp. (Synthetic)**  
ANOVA p: 1e-05

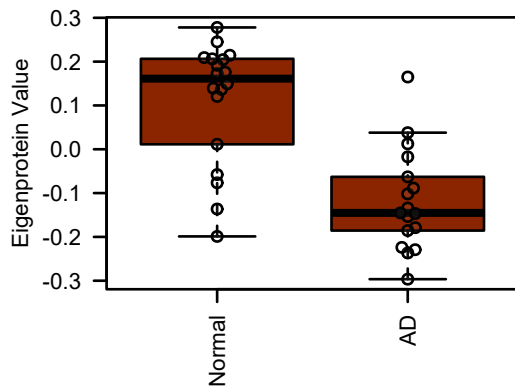

**MEorangered4.Plasma (Synthetic)**  
ANOVA p: 3e-05

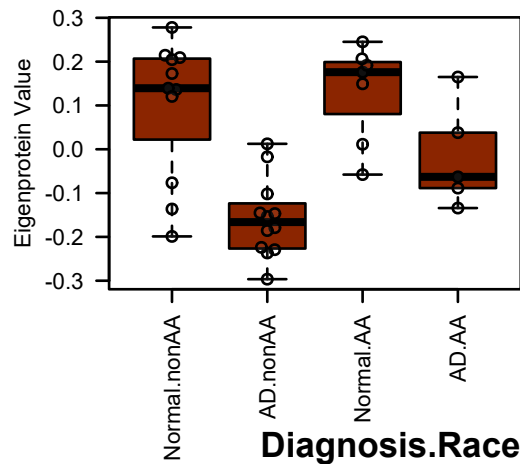

**MEorangered4.Plasma (Synthetic)**  
ANOVA p: 0.00027

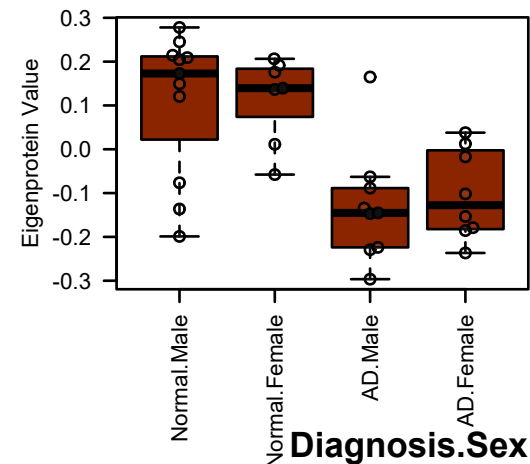

**bicor=0.65, p=2.9e-05**  
**cor=0.63, p=5e-05**

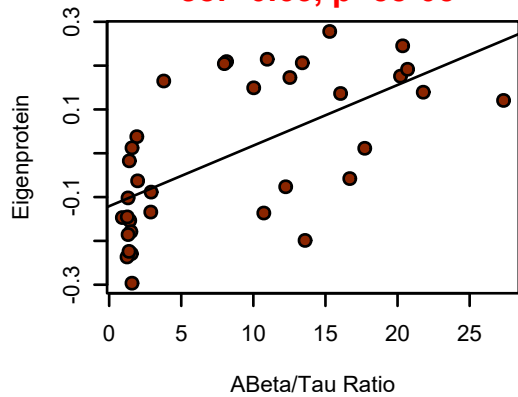

**bicor=0.54, p=0.0019**  
**cor=0.48, p=0.0063**

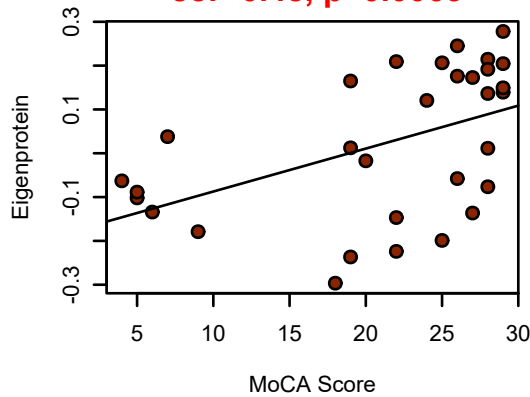

**bicor=0.12, p=0.62**  
**cor=0.12, p=0.64**

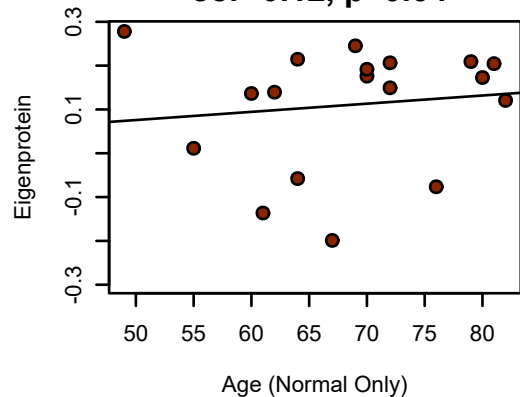

**bicor=-0.28, p=0.28**  
**cor=-0.21, p=0.42**

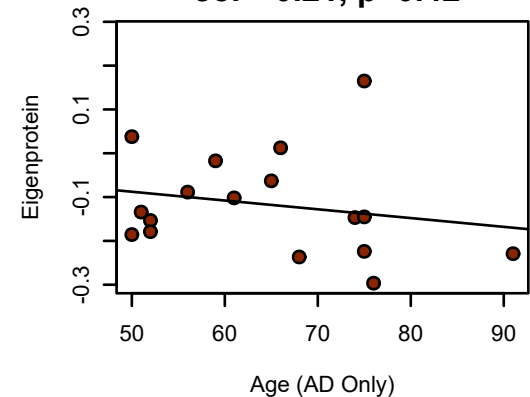

**M14 cyan.MEGATMT488**  
Protein Folding

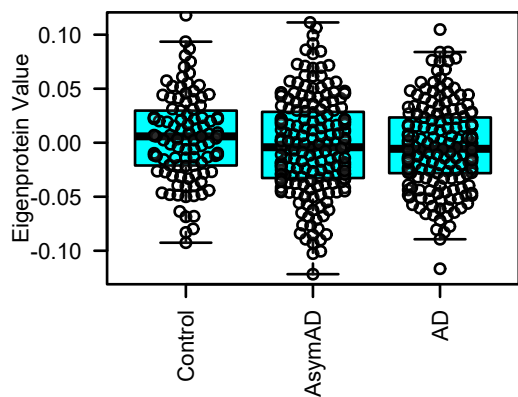

**MEcyan.Plasma 35 Samp. (Synthetic)**  
ANOVA p: 1.3e-05

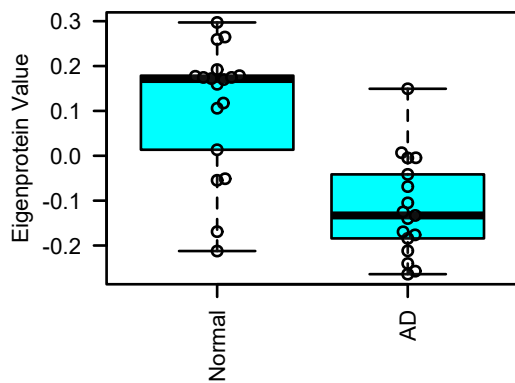

**MEcyan.Plasma (Synthetic)**  
ANOVA p: 3e-05

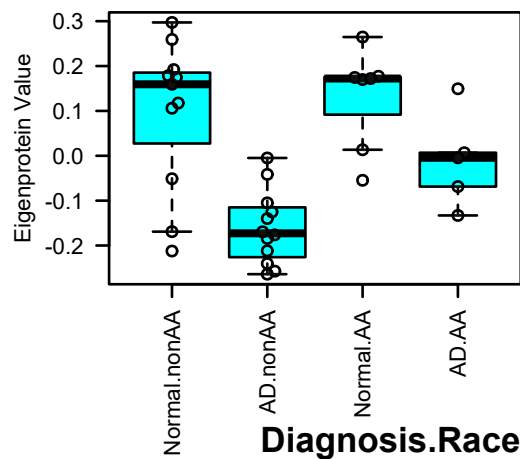

**MEcyan.Plasma (Synthetic)**  
ANOVA p: 3e-04

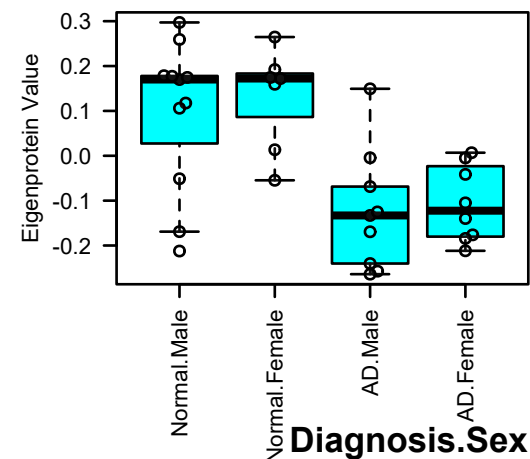

**bicor=0.64, p=3.6e-05**  
**cor=0.62, p=7.1e-05**

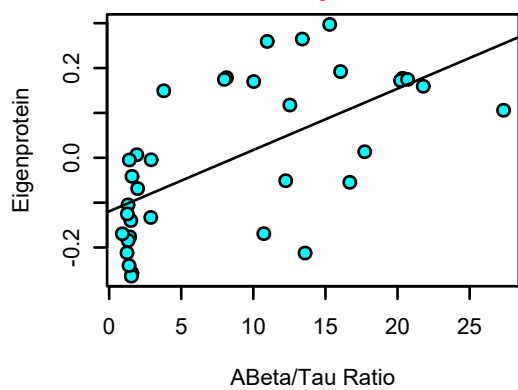

**bicor=0.53, p=0.002**  
**cor=0.46, p=0.0092**

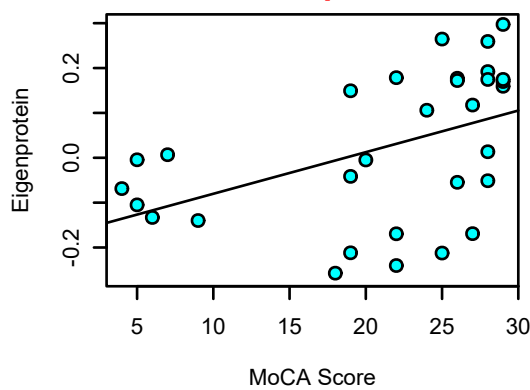

**bicor=-0.046, p=0.86**  
**cor=0.027, p=0.92**

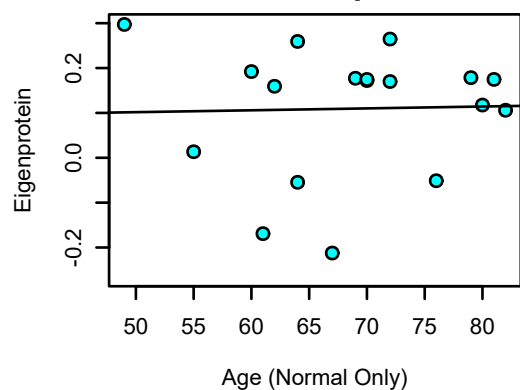

**bicor=-0.33, p=0.19**  
**cor=-0.28, p=0.28**

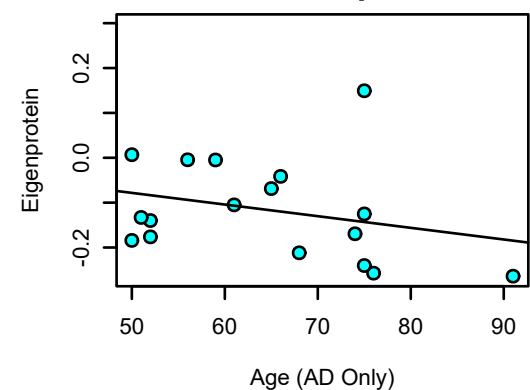

**M25 orange.MEGATMT488**  
**Sugar Metabolism**

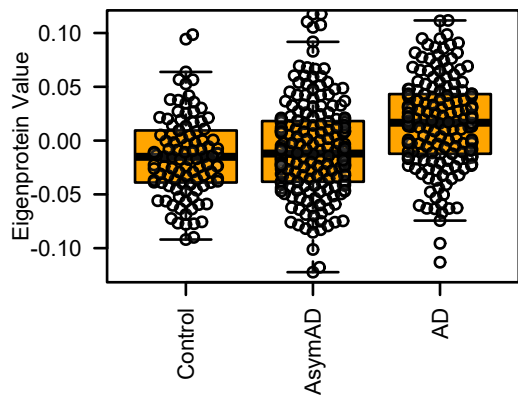

**MEorange.Plasma 35 Samp. (Synthetic)**  
**ANOVA p: 1.1e-05**

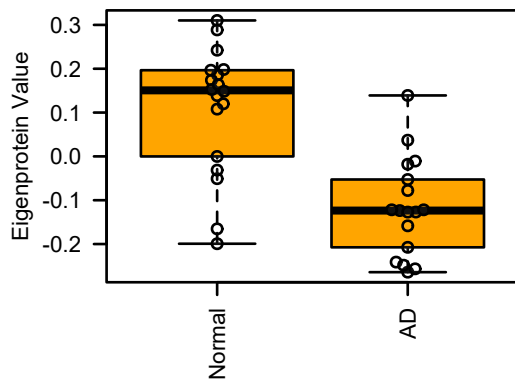

**MEorange.Plasma (Synthetic)**  
**ANOVA p: 2.2e-05**

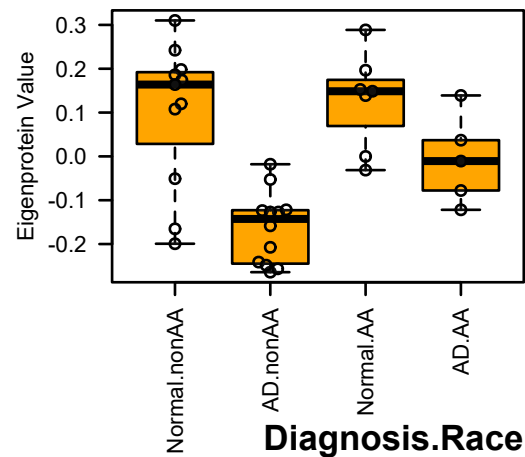

**MEorange.Plasma (Synthetic)**  
**ANOVA p: 0.00023**

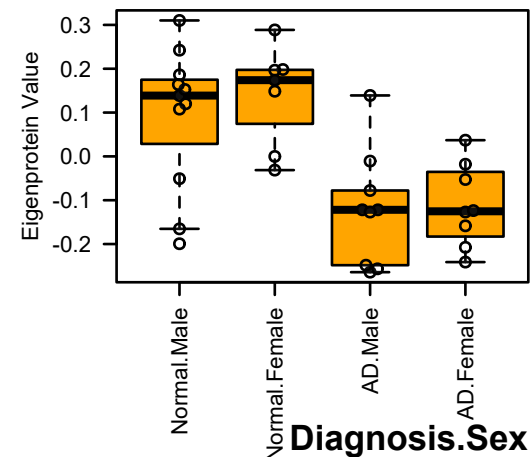

**bicor=0.65, p=2.5e-05**  
**cor=0.63, p=5e-05**

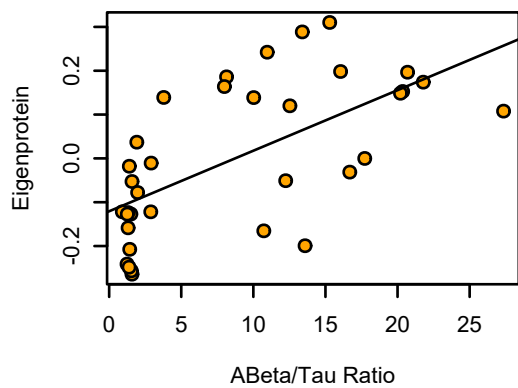

**bicor=0.52, p=0.0028**  
**cor=0.46, p=0.0092**

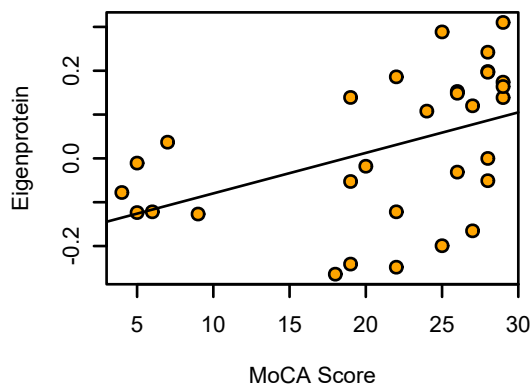

**bicor=-0.1, p=0.68**  
**cor=0.012, p=0.96**

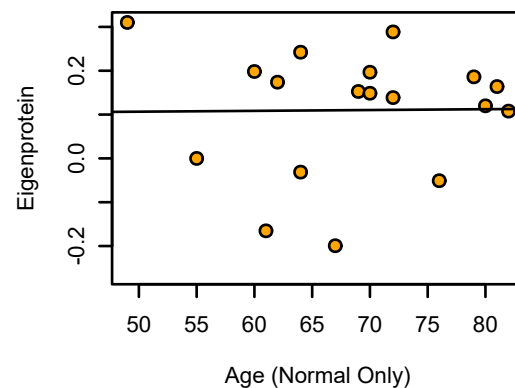

**bicor=-0.32, p=0.21**  
**cor=-0.29, p=0.26**

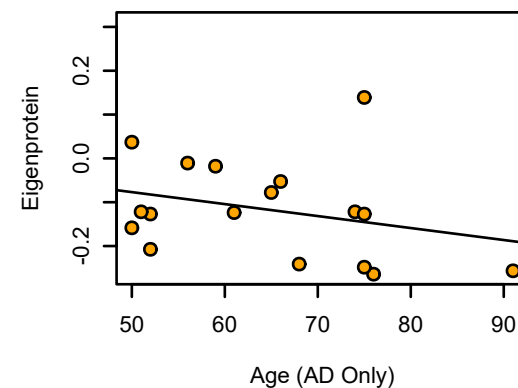

**M26 darkorange.MEGATMT488**  
**Complement/Acute Phase**

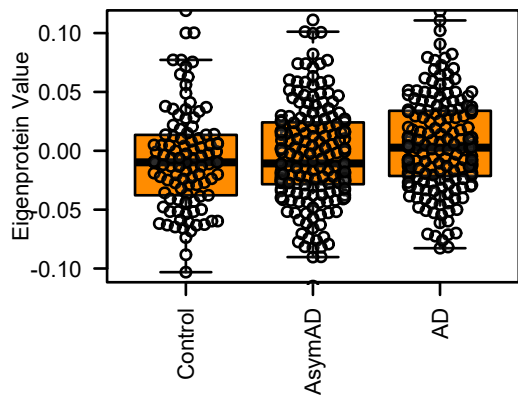

**MEdarkorange.Plasma 35 Samp. (Synthetic)**  
**ANOVA p: 0.0032**

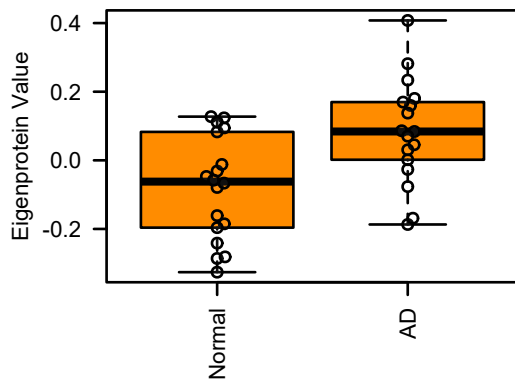

**MEdarkorange.Plasma (Synthetic)**  
**ANOVA p: 0.012**

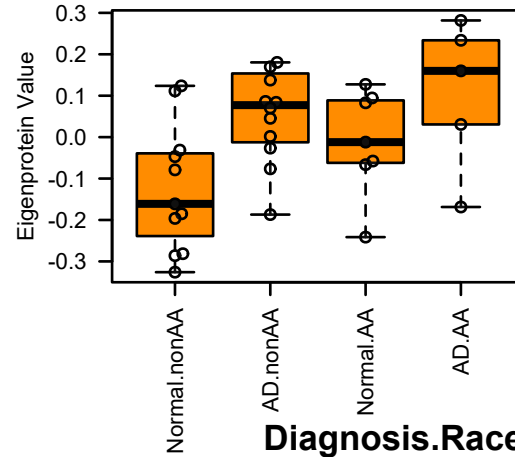

**MEdarkorange.Plasma (Synthetic)**  
**ANOVA p: 0.0024**

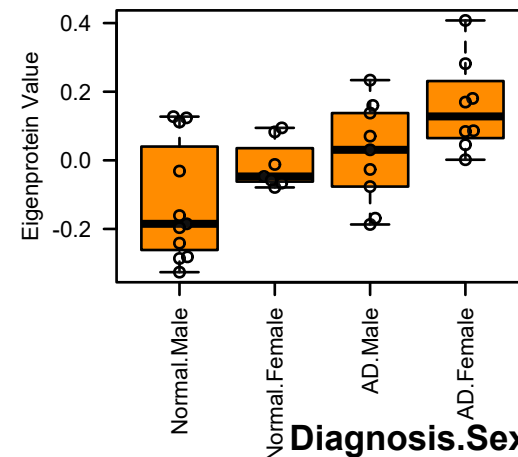

**bicor=-0.38, p=0.023**  
**cor=-0.39, p=0.021**

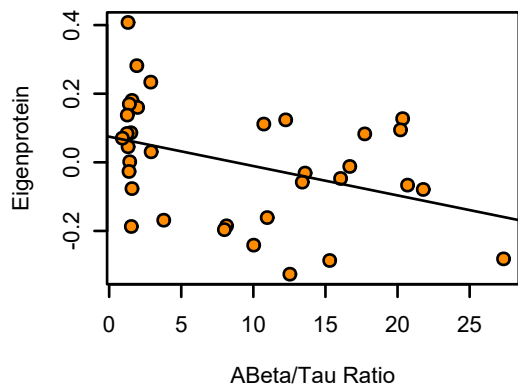

**bicor=-0.47, p=0.0074**  
**cor=-0.61, p=0.00027**

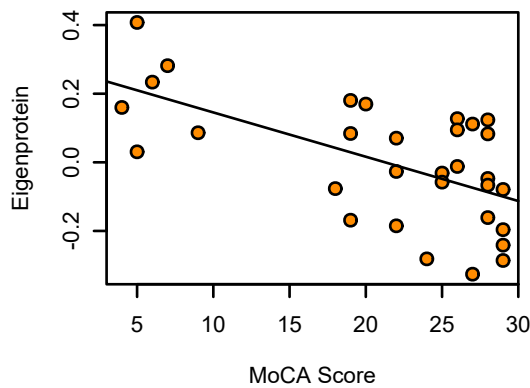

**bicor=-0.3, p=0.23**  
**cor=-0.28, p=0.26**

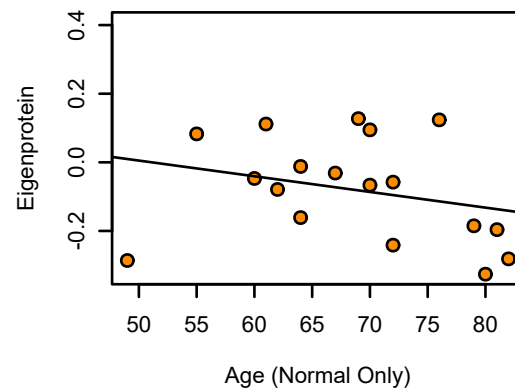

**bicor=-0.55, p=0.021**  
**cor=-0.57, p=0.017**

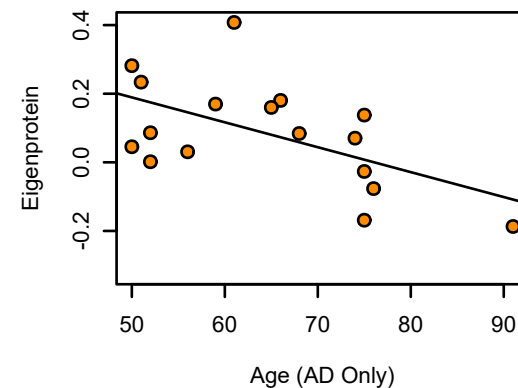

**M40 mediumpurple3.MEGATMT488**  
**Ambiguous**

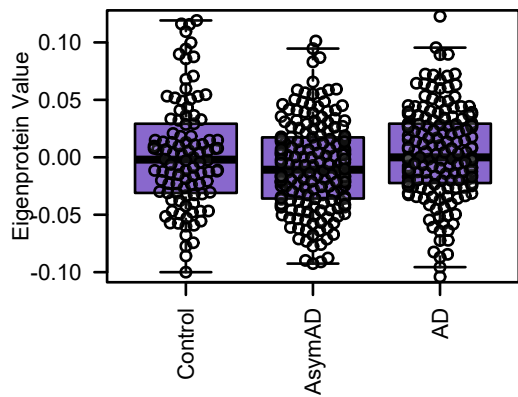

**MEmediumpurple3.Plasma 35 Samp. (Synthet**  
**ANOVA p: 0.18**

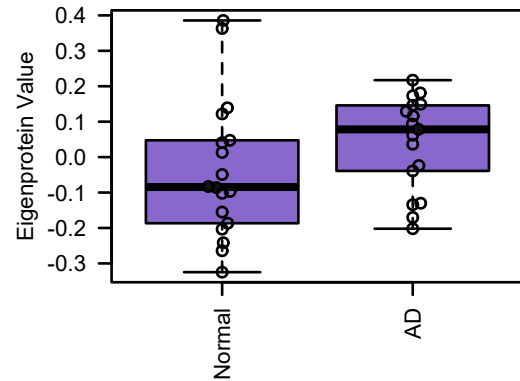

**MEmediumpurple3.Plasma (Synthetic)**  
**ANOVA p: 0.12**

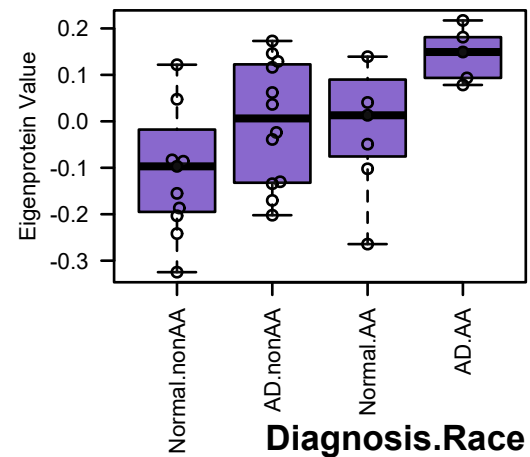

**MEmediumpurple3.Plasma (Synthetic)**  
**ANOVA p: 0.55**

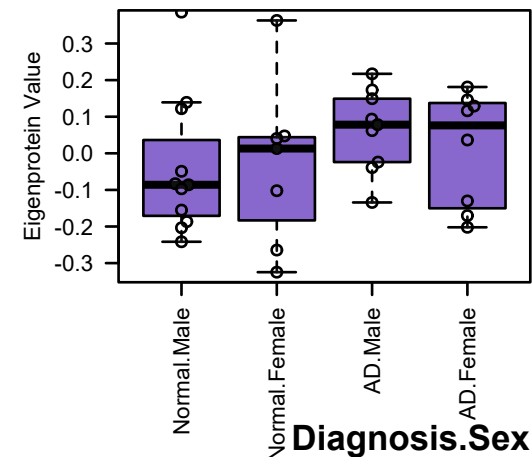

**bicor=-0.17, p=0.32**  
**cor=-0.15, p=0.39**

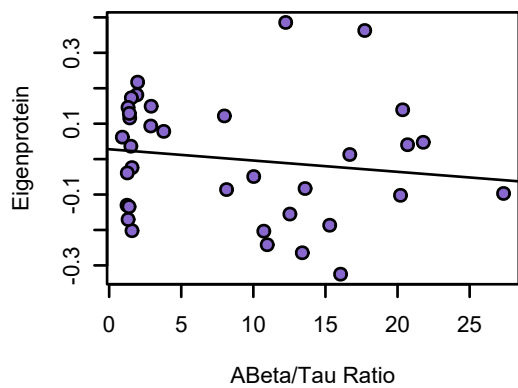

**bicor=-0.12, p=0.53**  
**cor=-0.34, p=0.061**

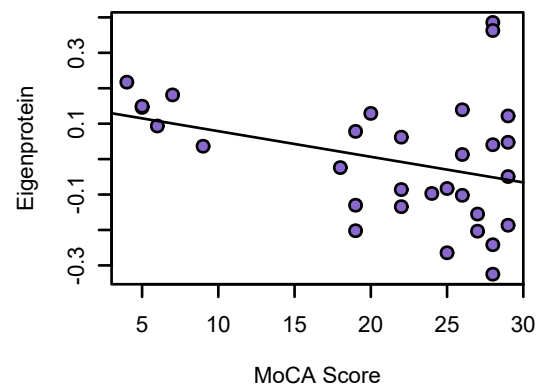

**bicor=0.12, p=0.64**  
**cor=0.1, p=0.69**

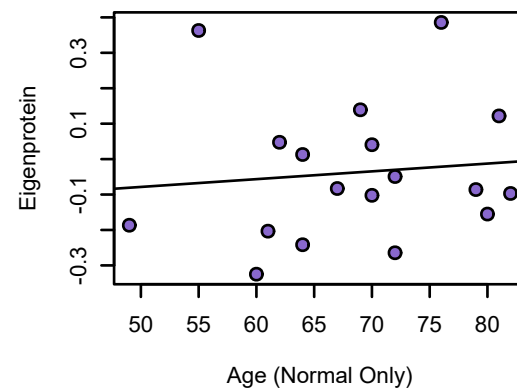

**bicor=-0.12, p=0.63**  
**cor=-0.1, p=0.7**

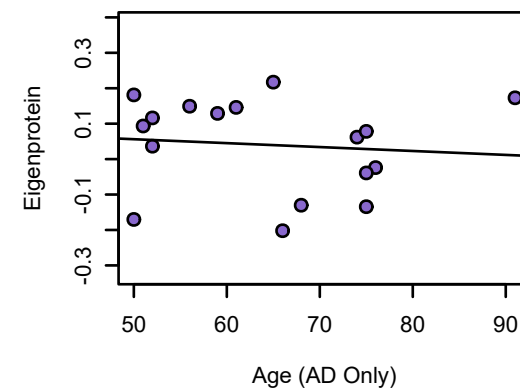

**M21 darkred.MEGATMT488**  
**MHC Complex/Immune**

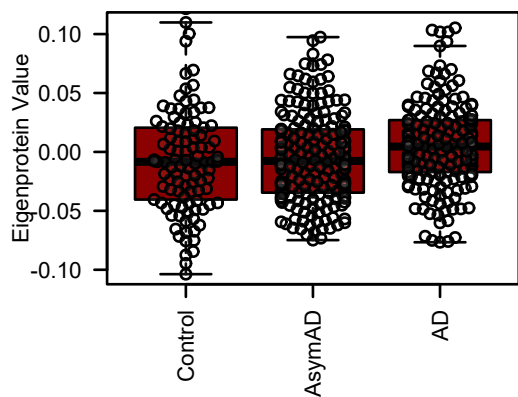

**MEdarkred.Plasma 35 Samp. (Synthetic)**  
**ANOVA p: 2.1e-05**

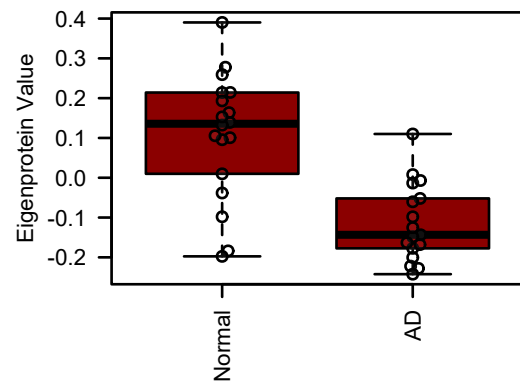

**MEdarkred.Plasma (Synthetic)**  
**ANOVA p: 6.7e-05**

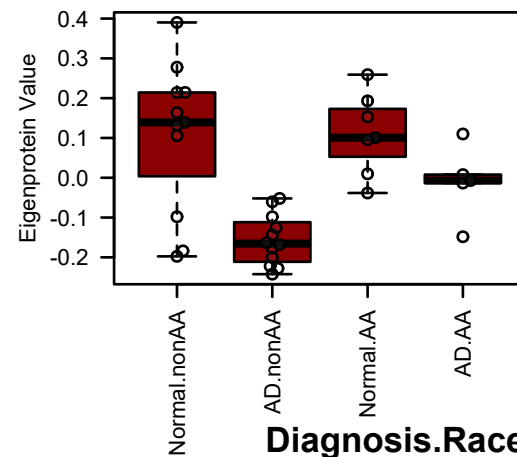

**MEdarkred.Plasma (Synthetic)**  
**ANOVA p: 0.00043**

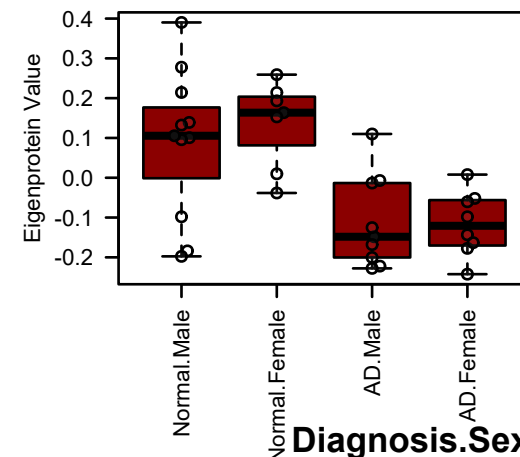

**bicor=0.64, p=3.4e-05**  
**cor=0.62, p=7.1e-05**

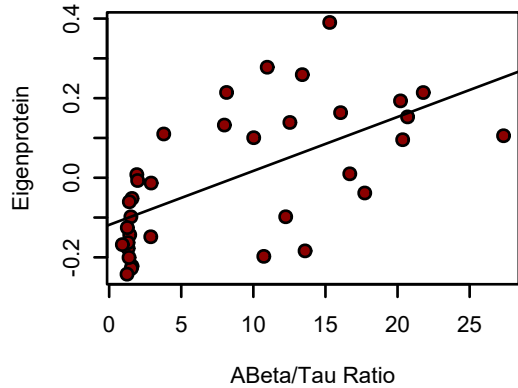

**bicor=0.52, p=0.0027**  
**cor=0.44, p=0.013**

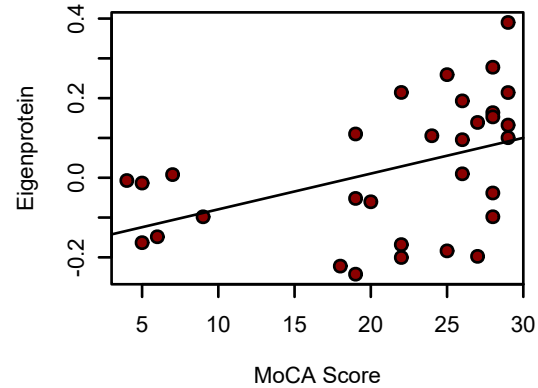

**bicor=-0.027, p=0.91**  
**cor=-0.057, p=0.82**

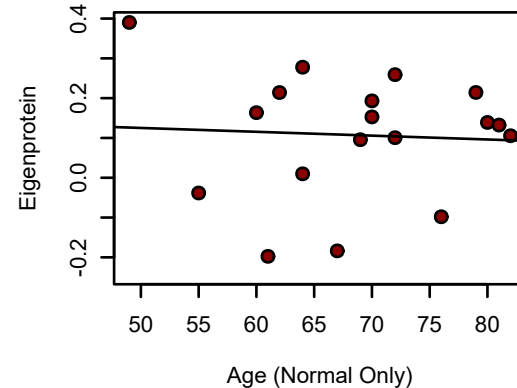

**bicor=-0.31, p=0.23**  
**cor=-0.26, p=0.31**

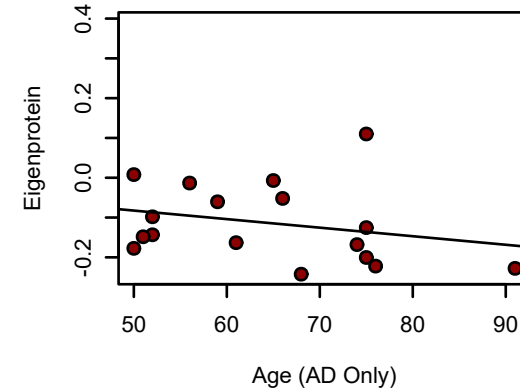

**M27 white.MEGATMT488**  
**Extracellular Matrix**

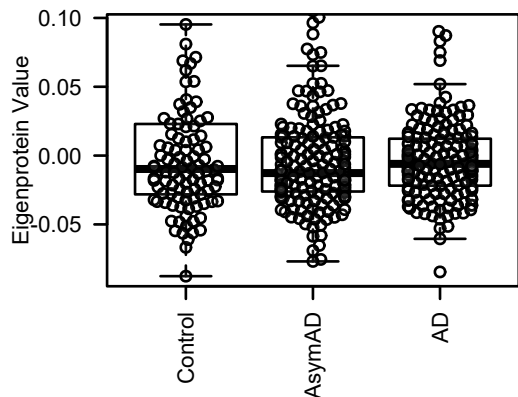

**MEwhite.Plasma 35 Samp. (Synthetic)**  
**ANOVA p: 6e-05**

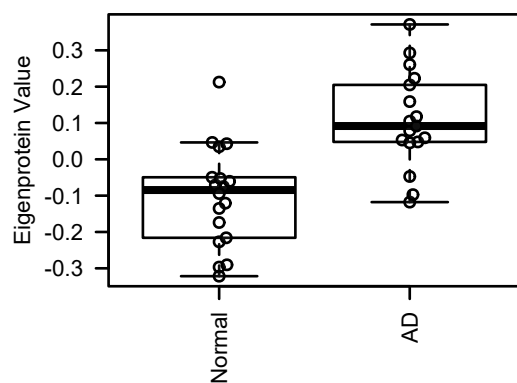

**MEwhite.Plasma (Synthetic)**  
**ANOVA p: 3.1e-05**

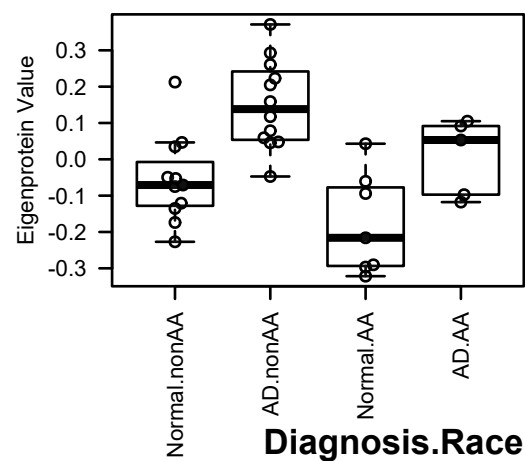

**MEwhite.Plasma (Synthetic)**  
**ANOVA p: 0.00041**

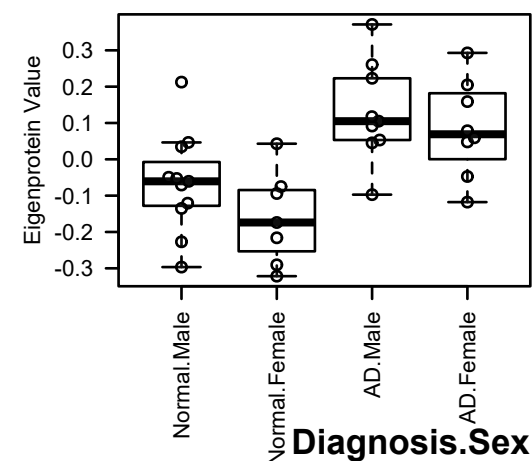

**bicor=-0.66, p=1.4e-05**  
**cor=-0.65, p=2.4e-05**

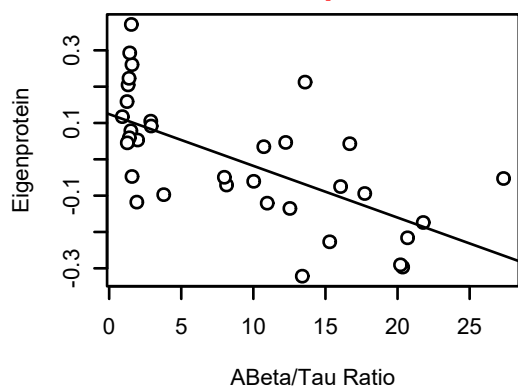

**bicor=-0.54, p=0.0019**  
**cor=-0.41, p=0.022**

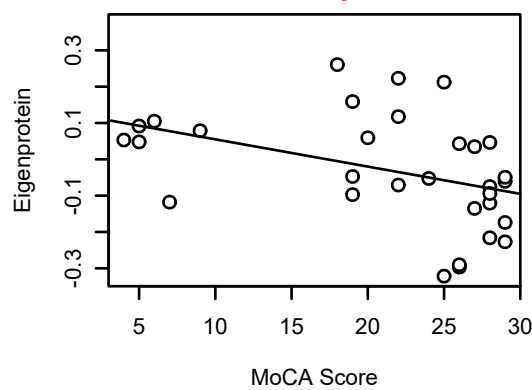

**bicor=0.087, p=0.73**  
**cor=0.079, p=0.76**

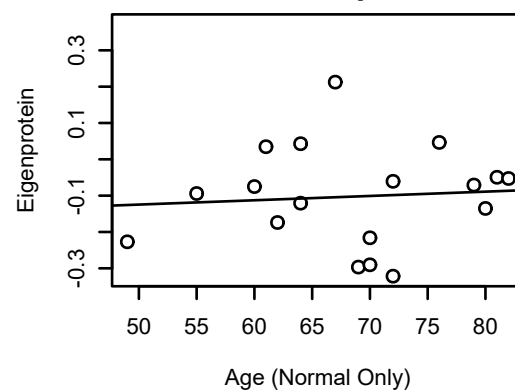

**bicor=0.21, p=0.41**  
**cor=0.3, p=0.24**

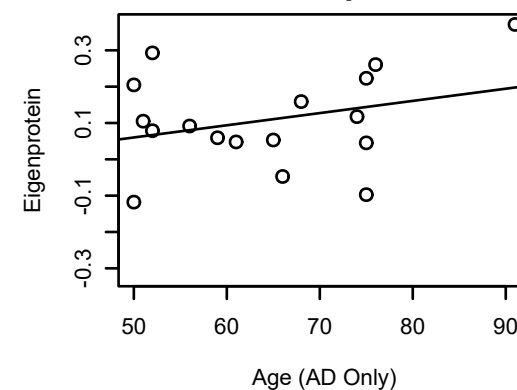

**M16 lightcyan.MEGATMT488**  
**RNA Binding**

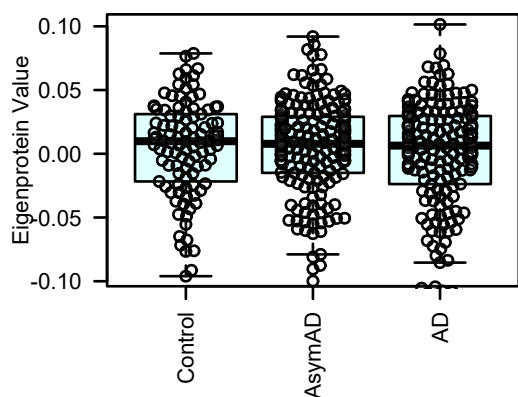

**MElightcyan.Plasma 35 Samp. (Synthetic)**  
**ANOVA p: 2.3e-05**

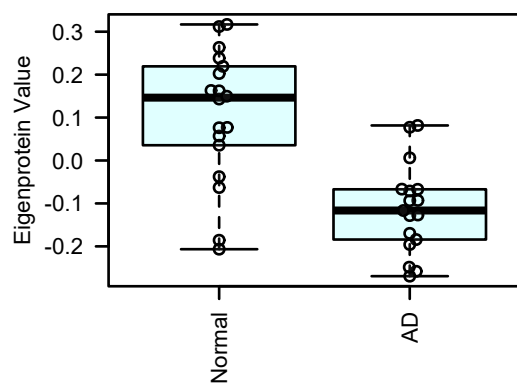

**MElightcyan.Plasma (Synthetic)**  
**ANOVA p: 5.6e-05**

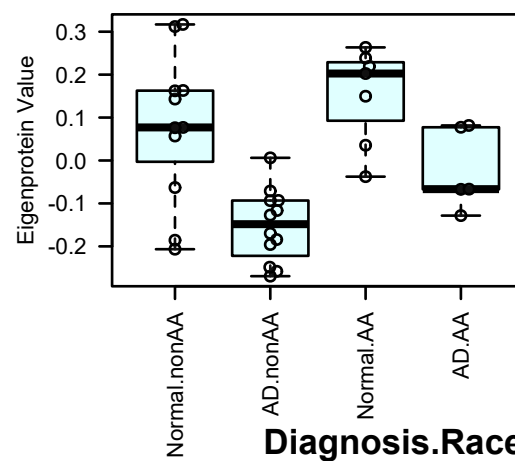

**MElightcyan.Plasma (Synthetic)**  
**ANOVA p: 0.00048**

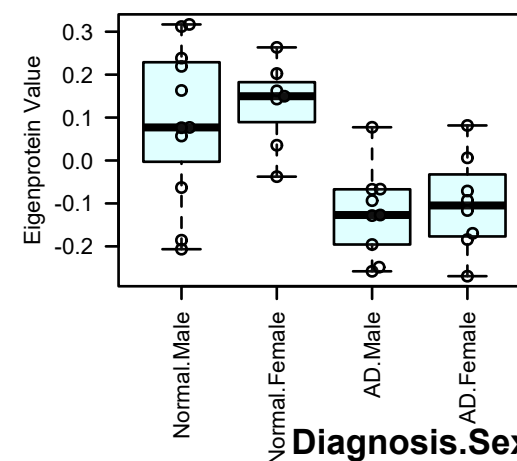

**bicor=0.64, p=3.3e-05**  
**cor=0.62, p=7.1e-05**

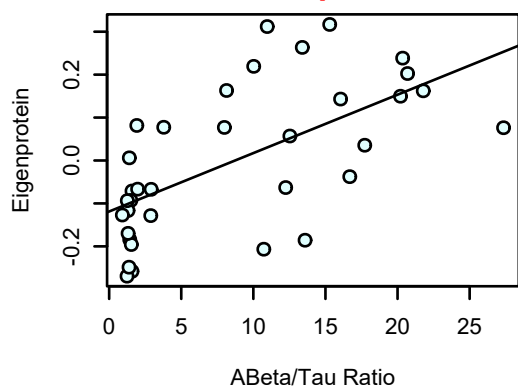

**bicor=0.57, p=0.00075**  
**cor=0.44, p=0.013**

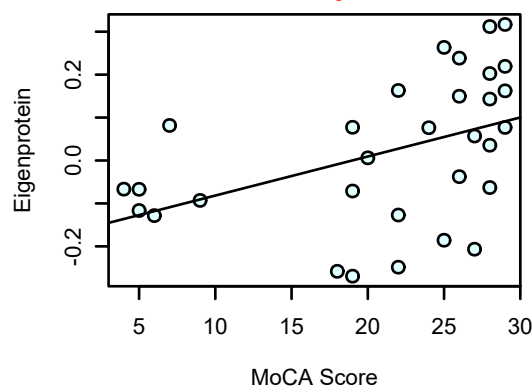

**bicor=-0.092, p=0.72**  
**cor=-0.088, p=0.73**

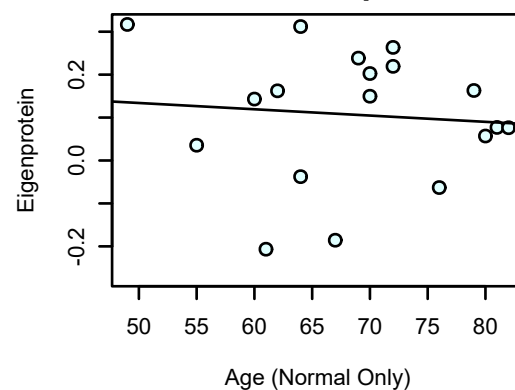

**bicor=-0.3, p=0.24**  
**cor=-0.29, p=0.26**

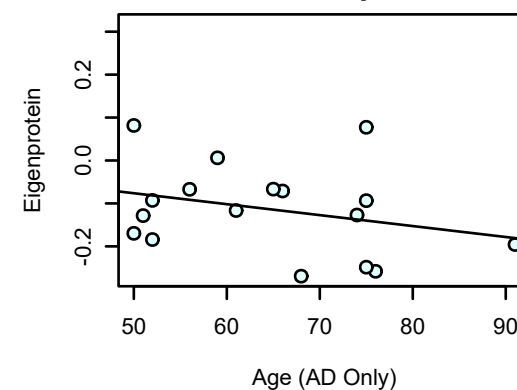

**M18 lightgreen.MEGATMT488**  
RNA Splicing

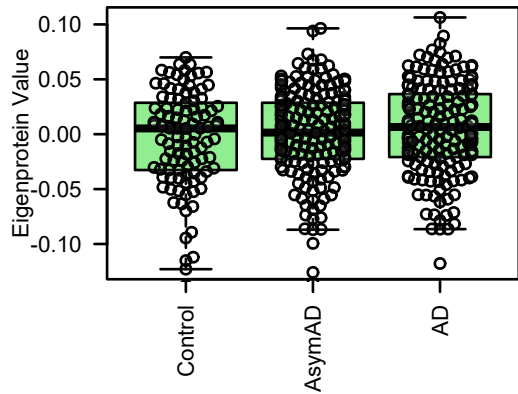

**MElightgreen.Plasma 35 Samp. (Synthetic)**  
ANOVA p: 0.00029

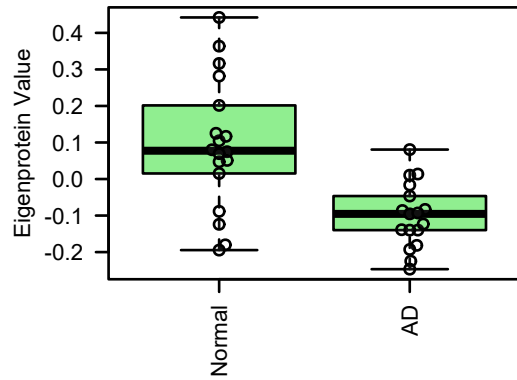

**MElightgreen.Plasma (Synthetic)**  
ANOVA p: 0.004

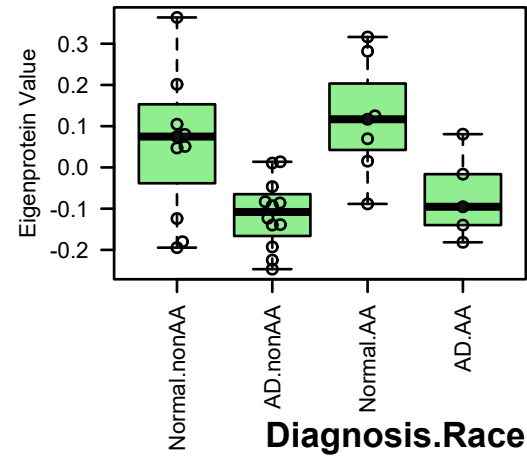

**MElightgreen.Plasma (Synthetic)**  
ANOVA p: 0.0041

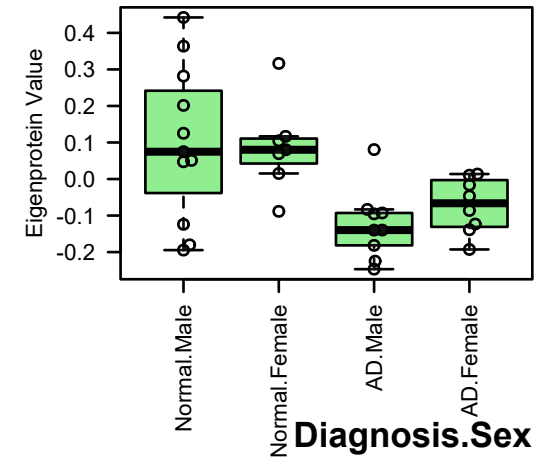

**bicor=0.53, p=0.001**  
**cor=0.48, p=0.0035**

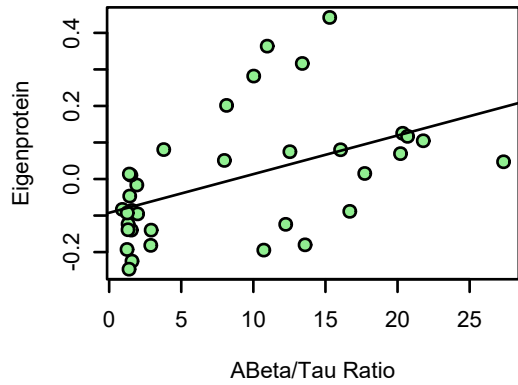

**bicor=0.51, p=0.0038**  
**cor=0.46, p=0.0092**

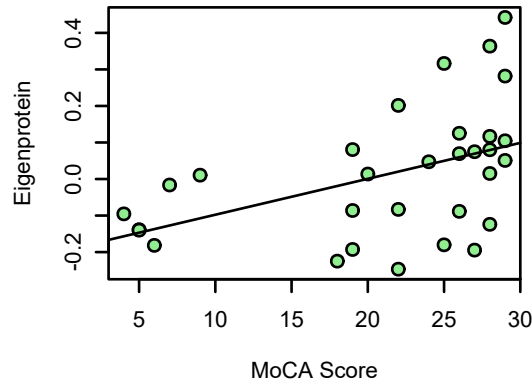

**bicor=-0.058, p=0.82**  
**cor=-0.14, p=0.58**

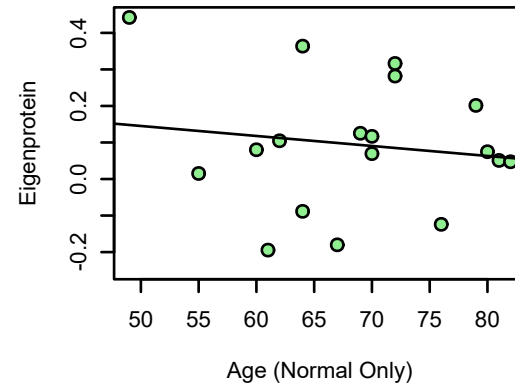

**bicor=-0.27, p=0.3**  
**cor=-0.25, p=0.33**

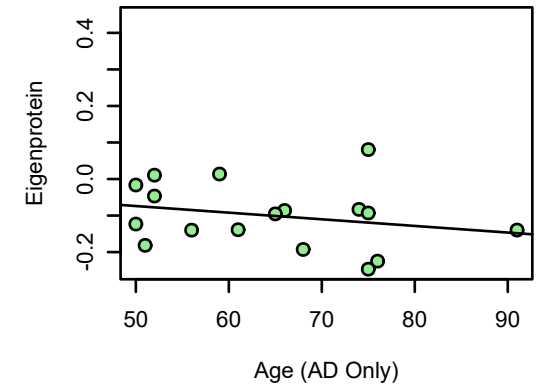

**M20 royalblue.MEGATMT488**  
RNA Splicing

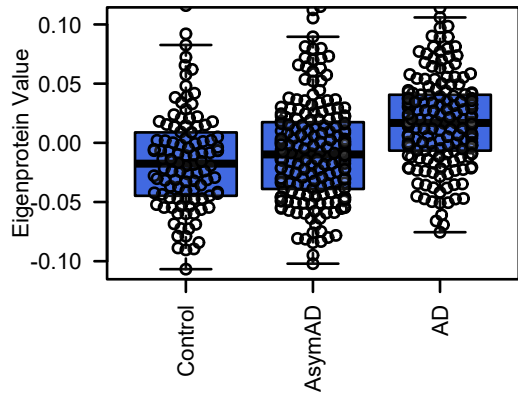

**MEroyalblue.Plasma 35 Samp. (Synthetic)**  
ANOVA p: 0.0013

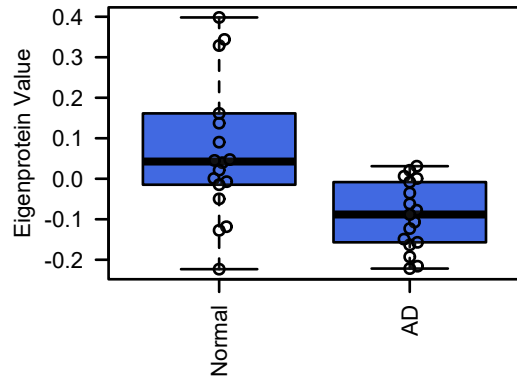

**MEroyalblue.Plasma (Synthetic)**  
ANOVA p: 0.0096

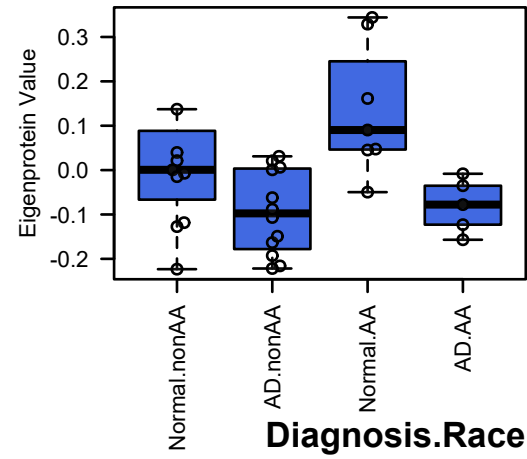

**MEroyalblue.Plasma (Synthetic)**  
ANOVA p: 0.014

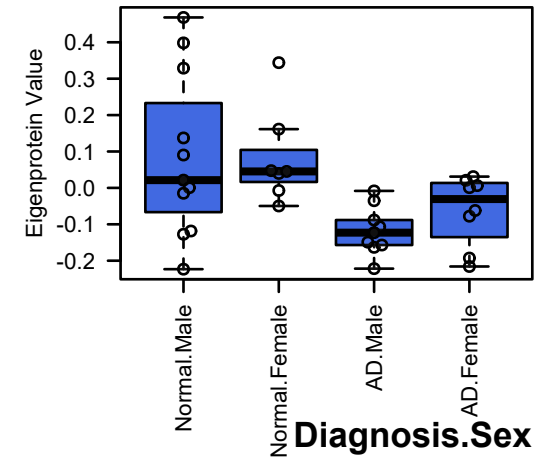

**bicor=0.46, p=0.0054**  
**cor=0.41, p=0.014**

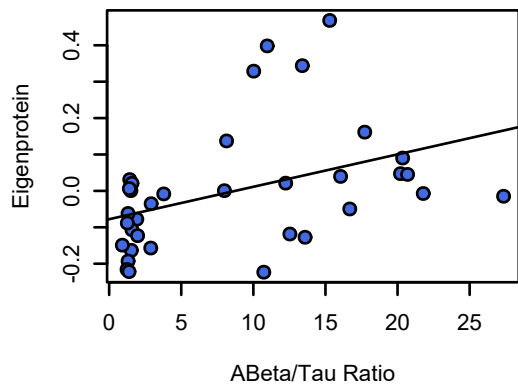

**bicor=0.45, p=0.011**  
**cor=0.4, p=0.026**

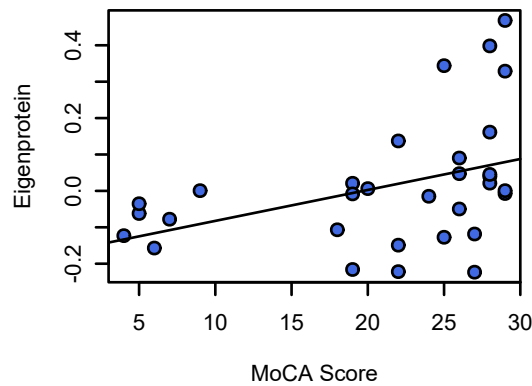

**bicor=-0.22, p=0.39**  
**cor=-0.29, p=0.24**

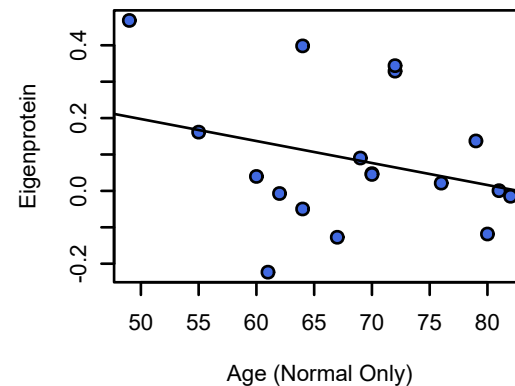

**bicor=-0.31, p=0.22**  
**cor=-0.31, p=0.23**

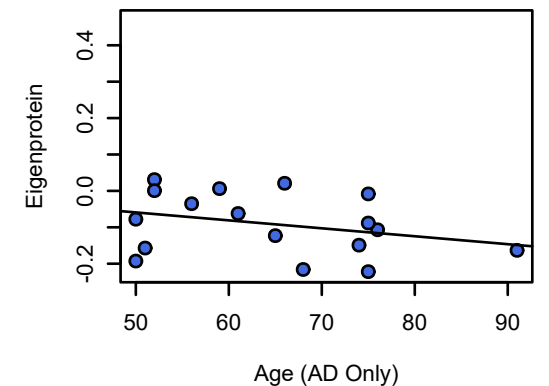



**M13 salmon.MEGATMT488  
RNA Splicing**

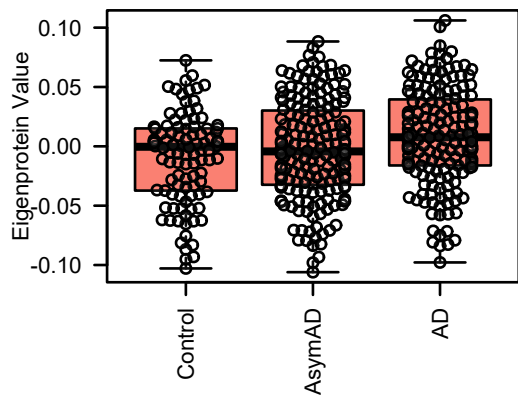

**MEsalmon.Plasma 35 Samp. (Synthetic)  
ANOVA p: 0.0012**

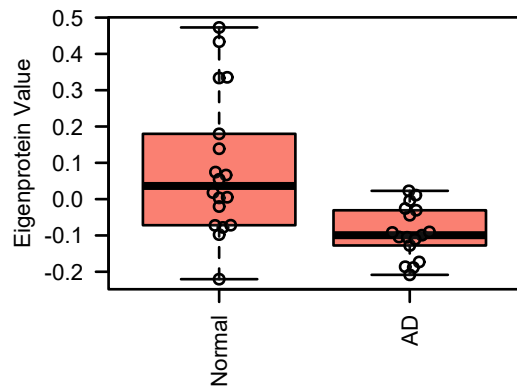

**MEsalmon.Plasma (Synthetic)  
ANOVA p: 0.012**

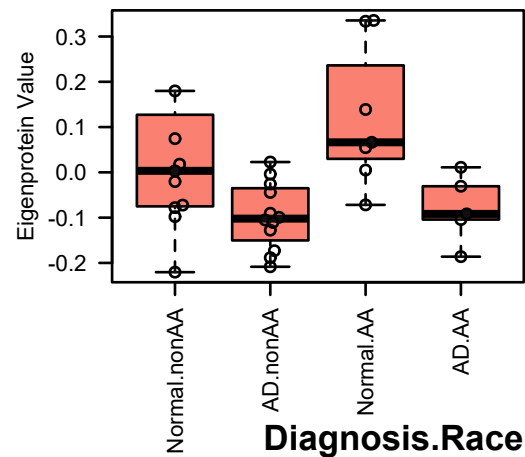

**MEsalmon.Plasma (Synthetic)  
ANOVA p: 0.012**

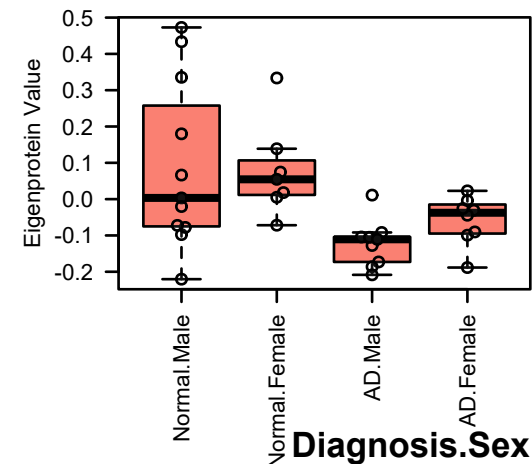

**bicor=0.5, p=0.0022  
cor=0.4, p=0.017**

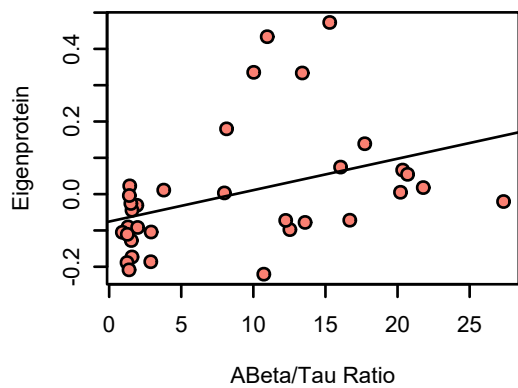

**bicor=0.45, p=0.011  
cor=0.43, p=0.016**

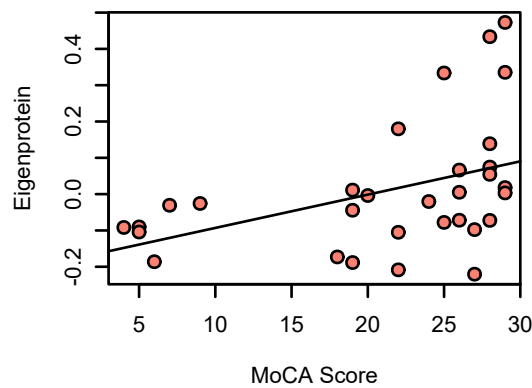

**bicor=-0.25, p=0.33  
cor=-0.3, p=0.23**

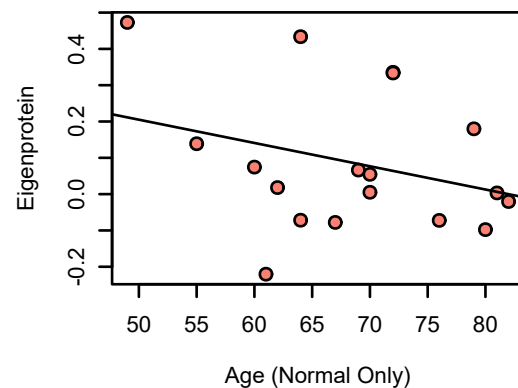

**bicor=-0.36, p=0.16  
cor=-0.35, p=0.17**

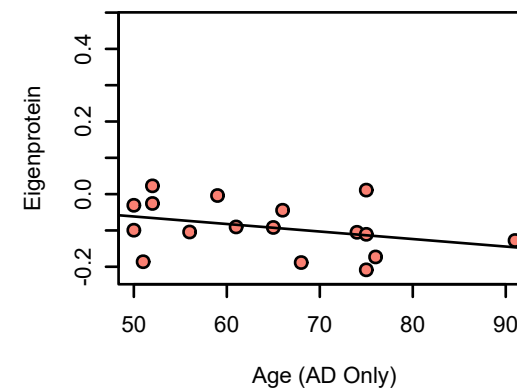

**M42 lightcyan1.MEGATMT488  
Matrisome**



**MElightcyan1.Plasma 35 Samp. (Synthetic)  
ANOVA p: 0.00014**

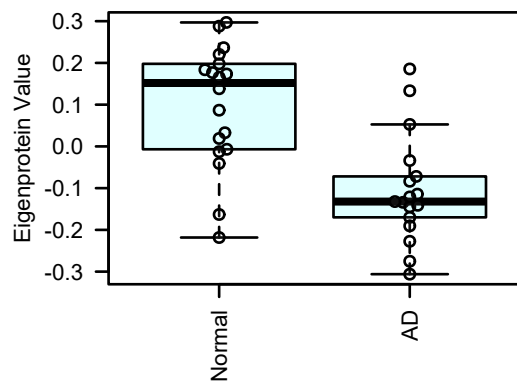

**MElightcyan1.Plasma (Synthetic)  
ANOVA p: 0.00054**

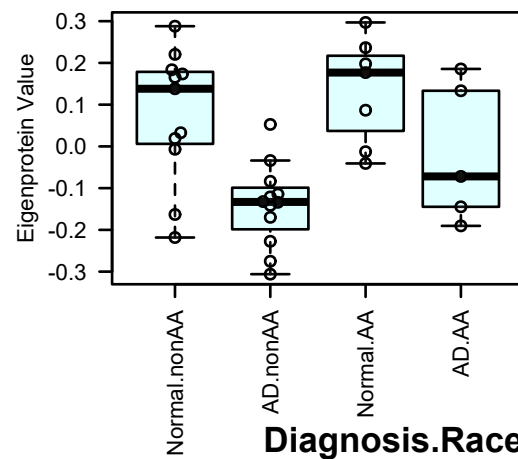

**MElightcyan1.Plasma (Synthetic)  
ANOVA p: 0.00054**

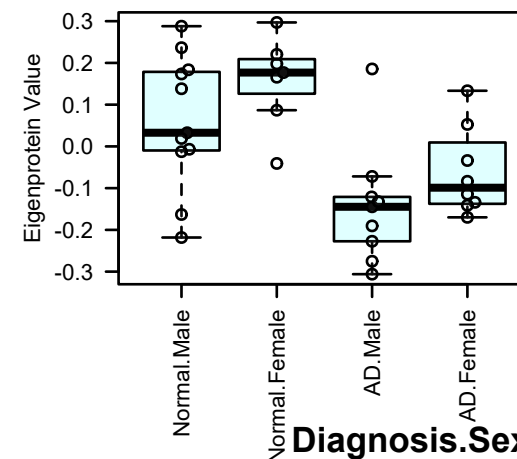

**bicor=0.57, p=0.00032  
cor=0.55, p=0.00062**

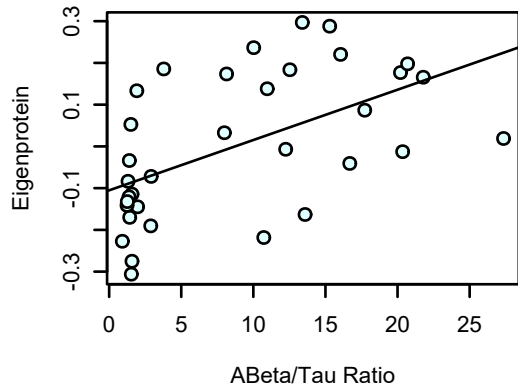

**bicor=0.47, p=0.0075  
cor=0.42, p=0.019**

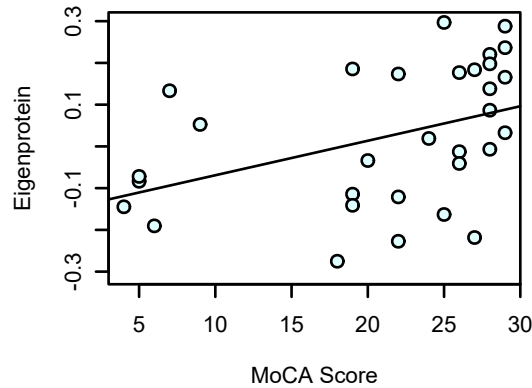

**bicor=-0.039, p=0.88  
cor=-0.057, p=0.82**

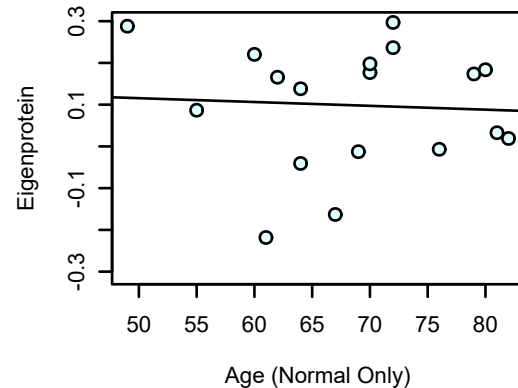

**bicor=-0.5, p=0.043  
cor=-0.39, p=0.12**

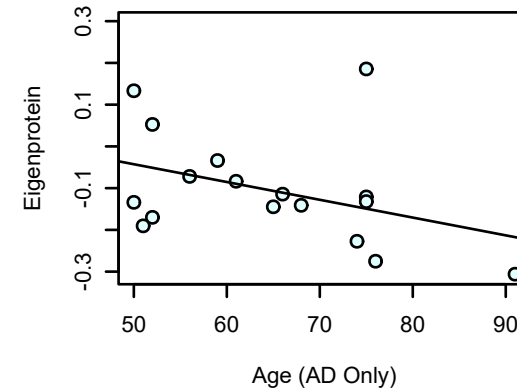

**M11 greenyellow.MEGATMT488**  
**Cell-ECM Interaction**

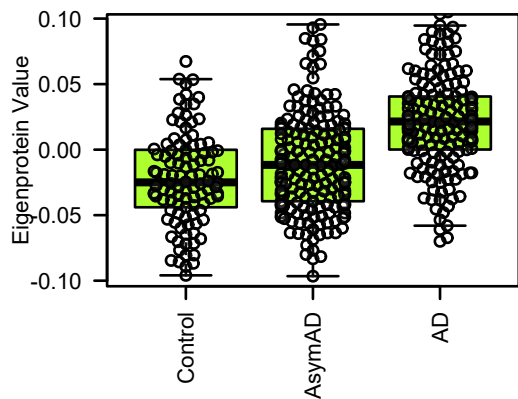

**MEgreenyellow.Plasma 35 Samp. (Synthetic)**  
**ANOVA p: 0.00014**

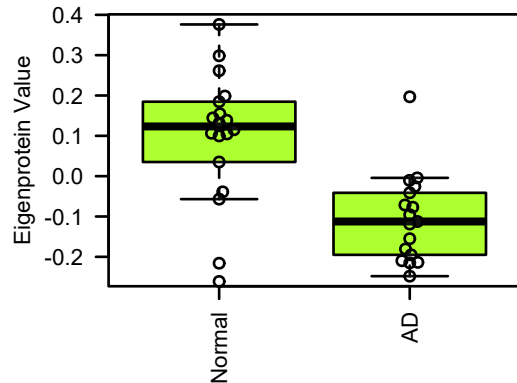

**MEgreenyellow.Plasma (Synthetic)**  
**ANOVA p: 0.00057**

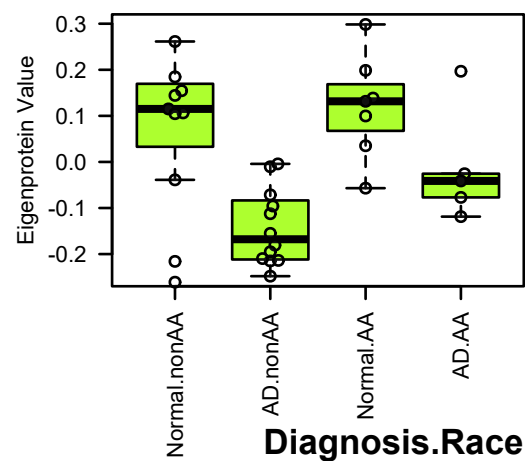

**MEgreenyellow.Plasma (Synthetic)**  
**ANOVA p: 0.0021**

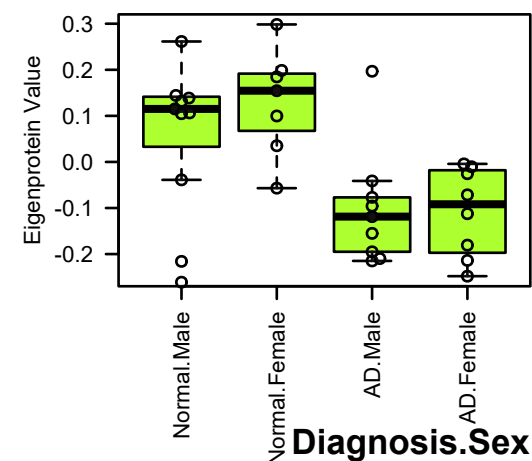

**bicor=0.61, p=0.00011**  
**cor=0.58, p=0.00026**

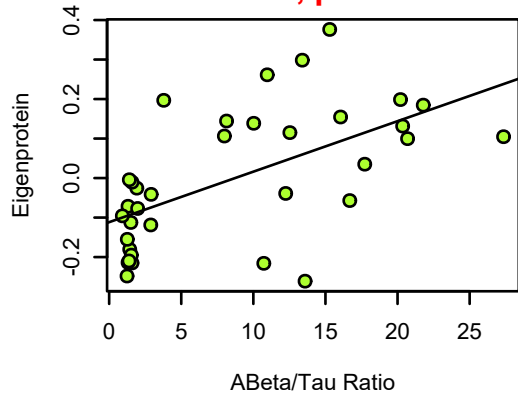

**bicor=0.46, p=0.0087**  
**cor=0.44, p=0.013**

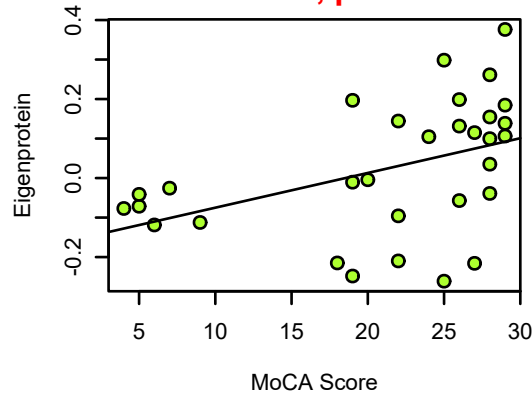

**bicor=-0.096, p=0.7**  
**cor=-0.075, p=0.77**

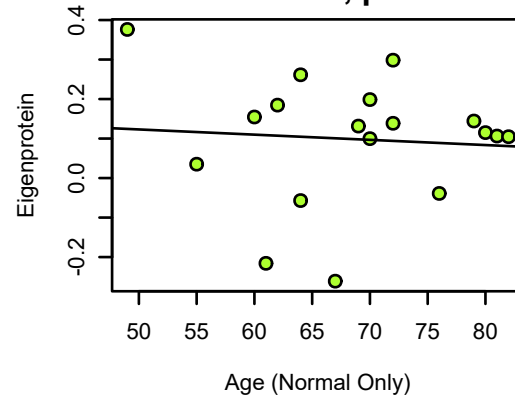

**bicor=-0.15, p=0.56**  
**cor=-0.091, p=0.73**

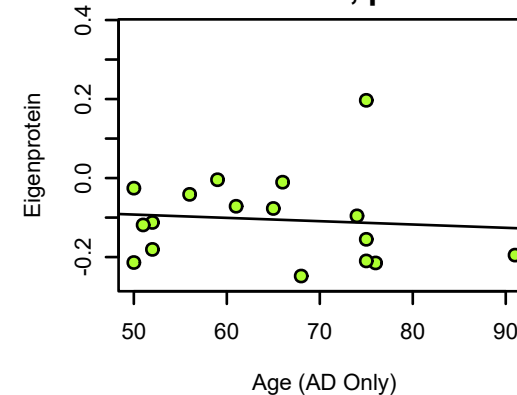

**M12 tan.MEGATMT488**  
**Cytoskeleton**

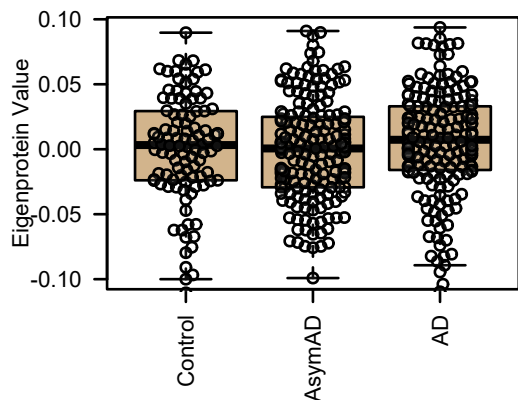

**MEtan.Plasma 35 Samp. (Synthetic)**  
**ANOVA p: 3.1e-05**

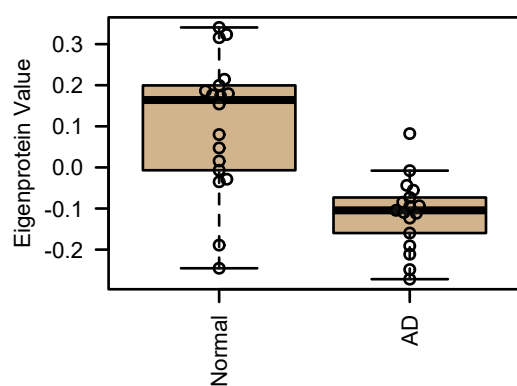

**MEtan.Plasma (Synthetic)**  
**ANOVA p: 7.9e-05**

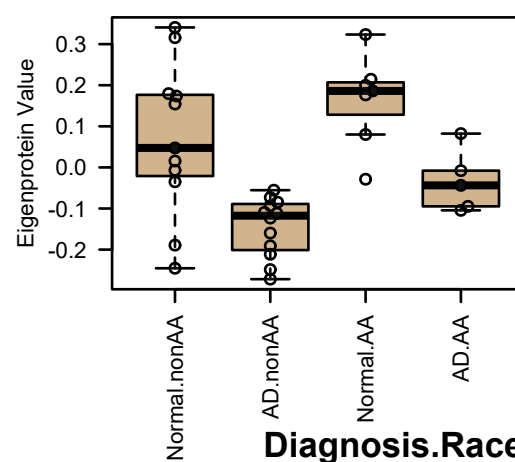

**MEtan.Plasma (Synthetic)**  
**ANOVA p: 0.00037**

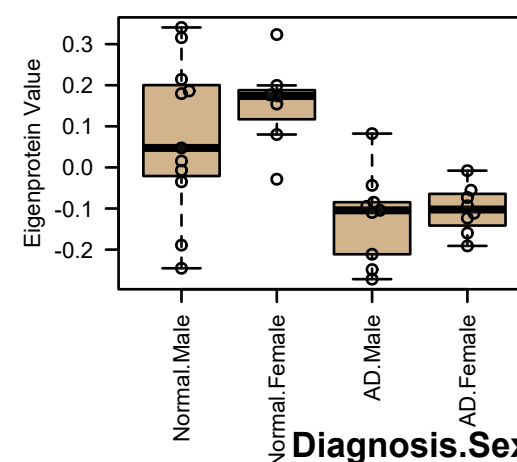

**bicor=0.63, p=4.5e-05**  
**cor=0.6, p=0.00014**

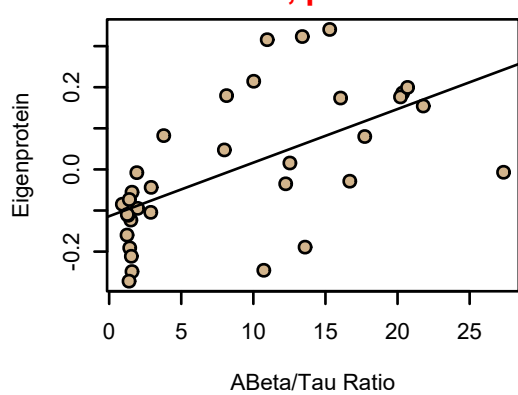

**bicor=0.53, p=0.0023**  
**cor=0.47, p=0.0076**

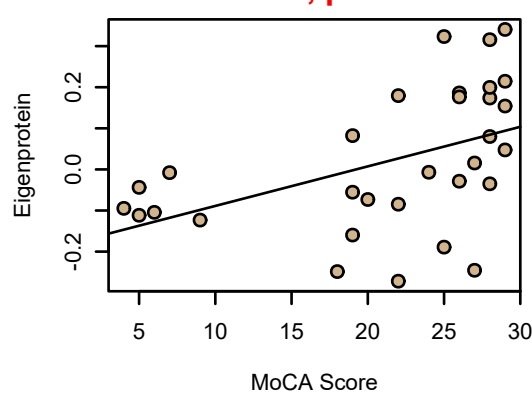

**bicor=-0.15, p=0.56**  
**cor=-0.17, p=0.5**

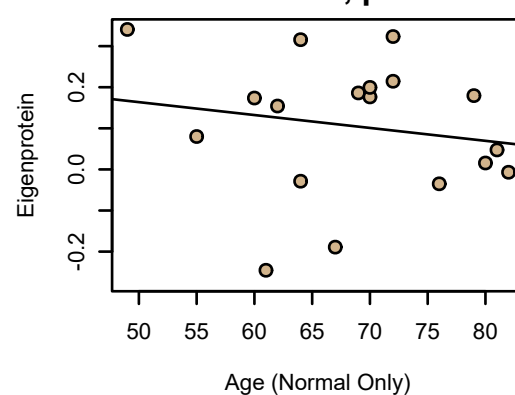

**bicor=-0.33, p=0.2**  
**cor=-0.31, p=0.23**

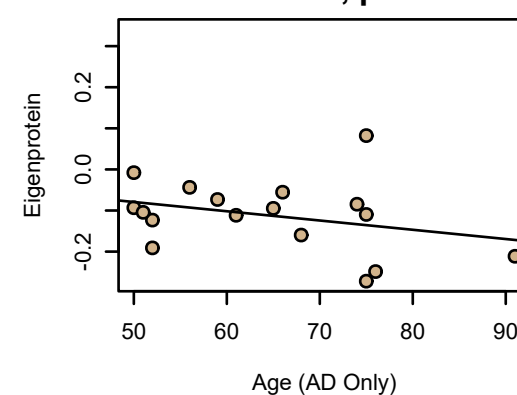

Supplement: Supplementary file [file media-1.pdf]
